# Supplementary material for: Complete avian malaria parasite genomes reveal features associated with lineage-specific evolution in birds and mammals
Source: Genome Res. 2018 Apr;28(4):547–60. doi: 10.1101/gr.218123.116 (PMC5880244; doi:10.1101/gr.218123.116)
Supplement: Supplemental Material [file supp_gr.218123.116_Supplemental_Table_S6.xlsx]

## Sheet: ETRAMP
Supplemental Table S6: Multigene families in the genome of P. gallinaceum 8A and P. relictum SGS1; early transcribed membrane protein (ETRAMP)
Gene Models (IDs) and Protein annotation
P. gallinaceum gene	Protein annotation	P. relictum gene	Protein annotation
PGAL8A_00001000	early transcribed membrane protein (ETRAMP)	PRELSG_0600200	early transcribed membrane protein (ETRAMP)
PGAL8A_00001300	early transcribed membrane protein (ETRAMP)	PRELSG_0616900	early transcribed membrane protein (ETRAMP)
PGAL8A_00122900	early transcribed membrane protein (ETRAMP)	PRELSG_0617000	early transcribed membrane protein (ETRAMP)
PGAL8A_00177600	early transcribed membrane protein (ETRAMP)	PRELSG_0004100	early transcribed membrane protein (ETRAMP)
PGAL8A_00180300	early transcribed membrane protein (ETRAMP)	PRELSG_0004600	early transcribed membrane protein (ETRAMP)
PGAL8A_00180500	early transcribed membrane protein (ETRAMP)	PRELSG_0012100	early transcribed membrane protein (ETRAMP)
PGAL8A_00195000	early transcribed membrane protein (ETRAMP)	PRELSG_0016300	early transcribed membrane protein (ETRAMP)
PGAL8A_00195100	early transcribed membrane protein (ETRAMP)	PRELSG_0017000	early transcribed membrane protein (ETRAMP)
PGAL8A_00265700	early transcribed membrane protein (ETRAMP)	PRELSG_0021300	early transcribed membrane protein (ETRAMP)
PGAL8A_00377100	early transcribed membrane protein (ETRAMP)	PRELSG_0026000	early transcribed membrane protein, pseudogene (ETRAMP)
PGAL8A_00475800	early transcribed membrane protein (ETRAMP)	PRELSG_0027400	early transcribed membrane protein (ETRAMP) (fragment)
PGAL8A_00492700	early transcribed membrane protein (ETRAMP)	PRELSG_0027700	early transcribed membrane protein (ETRAMP)
		PRELSG_9902000	early transcribed membrane protein (ETRAMP)
		PRELSG_9902500	early transcribed membrane protein (ETRAMP)

## Sheet:  retic binding protein
Supplemental Table S6: Multigene families in the genome of P. gallinaceum 8A and P. relictum SGS1; reticulocyte binding protein, putative
Gene Models (IDs) and Protein annotation
P. gallinaceum gene	Protein annotation	P. relictum gene	Protein annotation
PGAL8A_00000500	reticulocyte binding protein, putative (fragment)	PRELSG_0733800	reticulocyte binding protein, putative (long)
PGAL8A_00065400	reticulocyte binding protein, putative (long)	PRELSG_1445900	reticulocyte binding protein, putative (long)
PGAL8A_00185700	reticulocyte binding protein, putative (short)	PRELSG_0000300	reticulocyte binding protein, putative (short)
PGAL8A_00189900	reticulocyte binding protein, putative, pseudogene	PRELSG_0006200	reticulocyte binding protein, putative, pseudogene (long)
PGAL8A_00191800	reticulocyte binding protein, putative, pseudogene	PRELSG_0008000	reticulocyte binding protein, putative (long)
PGAL8A_00268200	reticulocyte binding protein, putative, pseudogene	PRELSG_0012500	reticulocyte binding protein, putative, pseudogene (fragment)
PGAL8A_00269300	reticulocyte binding protein, putative (long)	PRELSG_0013000	reticulocyte binding protein, putative (long)
PGAL8A_00272300	reticulocyte binding protein, putative (long)	PRELSG_0013400	reticulocyte binding protein, putative (long)
PGAL8A_00273000	reticulocyte binding protein, putative (long)	PRELSG_0014300	reticulocyte binding protein, putative (fragment)
PGAL8A_00329300	reticulocyte binding protein, putative (long)	PRELSG_0016500	reticulocyte binding protein, putative, pseudogene
PGAL8A_00377000	reticulocyte binding protein, putative, pseudogene	PRELSG_0017300	reticulocyte binding protein, putative (fragment)
PGAL8A_00411400	reticulocyte binding protein, putative (short)	PRELSG_0017500	reticulocyte binding protein, putative (fragment)
PGAL8A_00411600	reticulocyte binding protein, putative (fragment)	PRELSG_0019000	reticulocyte binding protein, putative (fragment)
PGAL8A_00413800	reticulocyte binding protein, putative (short)	PRELSG_0019600	reticulocyte binding protein, putative (fragment)
		PRELSG_0020900	reticulocyte binding protein, putative (long)
		PRELSG_0021100	reticulocyte binding protein, putative (long)
		PRELSG_0021400	reticulocyte binding protein, putative (long)
		PRELSG_0021800	reticulocyte binding protein, putative (fragment)
		PRELSG_0023800	reticulocyte binding protein, putative (fragment)
		PRELSG_0024400	reticulocyte binding protein, putative (fragment)
		PRELSG_0025100	reticulocyte binding protein, putative (fragment)
		PRELSG_0029600	reticulocyte binding protein, putative (long)
		PRELSG_0029900	reticulocyte binding protein, putative (fragment)
		PRELSG_0030700	reticulocyte binding protein, putative (long)
		PRELSG_0031400	reticulocyte binding protein, putative (fragment)
		PRELSG_0031600	reticulocyte binding protein, putative (short)
		PRELSG_0031700	reticulocyte binding protein, putative, pseudogene
		PRELSG_9901300	reticulocyte binding protein, putative (long)
		PRELSG_9901700	reticulocyte binding protein, putative, pseudogene
		PRELSG_9902100	reticulocyte binding protein, putative (fragment)
		PRELSG_9902200	reticulocyte binding protein, putative (fragment)
		PRELSG_9902400	reticulocyte binding protein, putative (fragment)
		PRELSG_9902700	reticulocyte binding protein, putative (fragment)

## Sheet: fam-e protein
Supplemental Table S6: Multigene families in the genome of P. gallinaceum 8A and P. relictum SGS1; fam-e protein
Gene Models (IDs) and Protein annotation
P. gallinaceum gene	Protein annotation	P. relictum gene	Protein annotation
PGAL8A_00022600	fam-e protein	PRELSG_0003700	fam-e protein
PGAL8A_00042200	fam-e protein	PRELSG_0005300	fam-e protein
PGAL8A_00042300	fam-e protein	PRELSG_0030100	fam-e protein
PGAL8A_00177300	fam-e protein (fragment)	PRELSG_0030400	fam-e protein
PGAL8A_00178200	fam-e protein
PGAL8A_00178600	fam-e protein
PGAL8A_00178700	fam-e protein
PGAL8A_00179600	fam-e protein
PGAL8A_00179800	fam-e protein
PGAL8A_00181300	fam-e protein (fragment)
PGAL8A_00185900	fam-e protein (fragment)
PGAL8A_00186200	fam-e protein
PGAL8A_00190900	fam-e protein
PGAL8A_00191100	fam-e protein (fragment)
PGAL8A_00191200	fam-e protein
PGAL8A_00191900	fam-e protein
PGAL8A_00194700	fam-e protein
PGAL8A_00264700	fam-e protein (fragment)
PGAL8A_00265100	fam-e protein
PGAL8A_00265900	fam-e protein
PGAL8A_00269900	fam-e protein
PGAL8A_00270100	fam-e protein (fragment)
PGAL8A_00320800	fam-e protein
PGAL8A_00321500	fam-e protein (fragment)
PGAL8A_00321600	fam-e protein (fragment)
PGAL8A_00324200	fam-e protein
PGAL8A_00324600	fam-e protein
PGAL8A_00324800	fam-e protein
PGAL8A_00324900	fam-e protein
PGAL8A_00325100	fam-e protein
PGAL8A_00325200	fam-e protein
PGAL8A_00325300	fam-e protein
PGAL8A_00327400	fam-e protein
PGAL8A_00328300	fam-e protein
PGAL8A_00375700	fam-e protein
PGAL8A_00375800	fam-e protein (fragment)
PGAL8A_00375900	fam-e protein
PGAL8A_00376100	fam-e protein
PGAL8A_00376200	fam-e protein
PGAL8A_00376300	fam-e protein
PGAL8A_00376500	fam-e protein
PGAL8A_00377300	fam-e protein (fragment)
PGAL8A_00410900	fam-e protein
PGAL8A_00411000	fam-e protein (fragment)
PGAL8A_00413700	fam-e protein
PGAL8A_00450200	fam-e protein
PGAL8A_00473900	fam-e protein
PGAL8A_00474500	fam-e protein
PGAL8A_00474900	fam-e protein

## Sheet: fam-f protein
Supplemental Table S6: Multigene families in the genome of P. gallinaceum 8A and P. relictum SGS1; fam-f protein (Plasmodium exported protein, unknown function)
Gene Models (IDs) and Protein annotation
P. gallinaceum gene	Protein annotation	P. relictum gene	Protein annotation	P. falciparum gene	Protein annotation	P.knowlesi gene	Protein annotation	P. vivax gene	Protein annotation
PGAL8A_00036000	fam-f protein	PRELSG_0101900	fam-f protein	PF3D7_1352900	Plasmodium exported protein, unknown function	PKNH_1248100	Plasmodium exported protein, unknown function	PVX_083545	Plasmodium exported protein, unknown function
PGAL8A_00130400	fam-f protein	PRELSG_0000900	fam-f protein
PGAL8A_00186300	fam-f protein	PRELSG_0002000	fam-f protein
PGAL8A_00186400	fam-f protein	PRELSG_0003600	fam-f protein
PGAL8A_00186600	fam-f protein	PRELSG_0004300	fam-f protein
PGAL8A_00186700	fam-f protein	PRELSG_0004700	fam-f protein
PGAL8A_00186800	fam-f protein	PRELSG_0006100	fam-f protein
PGAL8A_00186900	fam-f protein	PRELSG_0013500	fam-f protein
PGAL8A_00187000	fam-f protein	PRELSG_0015600	fam-f protein
PGAL8A_00187100	fam-f protein, pseudogene	PRELSG_0019400	fam-f protein
PGAL8A_00187200	fam-f protein	PRELSG_0021000	fam-f protein
PGAL8A_00187300	fam-f protein	PRELSG_0024600	fam-f protein (fragment)
PGAL8A_00187400	fam-f protein	PRELSG_9901500	fam-f protein
PGAL8A_00187500	fam-f protein	PRELSG_9901900	fam-f protein
PGAL8A_00272800	fam-f protein	PRELSG_9902300	fam-f protein
PGAL8A_00273100	fam-f protein
PGAL8A_00320400	fam-f protein
PGAL8A_00327700	fam-f protein, pseudogene

## Sheet: fam-g protein
Supplemental Table S6: Multigene families in the genome of P. gallinaceum 8A and P. relictum SGS1; 2-exon gene family
Gene Models (IDs) and Protein annotation
P. gallinaceum gene	Protein annotation
PGAL8A_00022400	fam-g protein
PGAL8A_00040300	fam-g protein
PGAL8A_00040900	fam-g protein
PGAL8A_00041000	fam-g protein
PGAL8A_00041200	fam-g protein, pseudogene
PGAL8A_00041300	fam-g protein
PGAL8A_00041400	fam-g protein
PGAL8A_00041500	fam-g protein
PGAL8A_00041600	fam-g protein
PGAL8A_00041700	fam-g protein
PGAL8A_00041800	fam-g protein
PGAL8A_00041900	fam-g protein
PGAL8A_00042000	fam-g protein
PGAL8A_00053300	fam-g protein (fragment)
PGAL8A_00178500	fam-g protein
PGAL8A_00179100	fam-g protein
PGAL8A_00179200	fam-g protein
PGAL8A_00187700	fam-g protein
PGAL8A_00187800	fam-g protein
PGAL8A_00187900	fam-g protein
PGAL8A_00188000	fam-g protein
PGAL8A_00188300	fam-g protein
PGAL8A_00188400	fam-g protein
PGAL8A_00188500	fam-g protein
PGAL8A_00188600	fam-g protein
PGAL8A_00188700	fam-g protein
PGAL8A_00188800	fam-g protein
PGAL8A_00188900	fam-g protein
PGAL8A_00189000	fam-g protein
PGAL8A_00189100	fam-g protein
PGAL8A_00189200	fam-g protein
PGAL8A_00189400	fam-g protein
PGAL8A_00189700	fam-g protein (fragment)
PGAL8A_00189800	fam-g protein (fragment)
PGAL8A_00190100	fam-g protein
PGAL8A_00190300	fam-g protein
PGAL8A_00264800	fam-g protein
PGAL8A_00266600	fam-g protein
PGAL8A_00266700	fam-g protein, pseudogene
PGAL8A_00266800	fam-g protein
PGAL8A_00266900	fam-g protein
PGAL8A_00267000	fam-g protein
PGAL8A_00267200	fam-g protein
PGAL8A_00267300	fam-g protein
PGAL8A_00267400	fam-g protein
PGAL8A_00267500	fam-g protein
PGAL8A_00267700	fam-g protein
PGAL8A_00267800	fam-g protein
PGAL8A_00267900	fam-g protein
PGAL8A_00268000	fam-g protein
PGAL8A_00268100	fam-g protein
PGAL8A_00269600	fam-g protein
PGAL8A_00269700	fam-g protein
PGAL8A_00269850	fam-g protein
PGAL8A_00270700	fam-g protein
PGAL8A_00270800	fam-g protein
PGAL8A_00271200	fam-g protein
PGAL8A_00271400	fam-g protein
PGAL8A_00271600	fam-g protein
PGAL8A_00271850	fam-g protein
PGAL8A_00271900	fam-g protein
PGAL8A_00272000	fam-g protein (fragment)
PGAL8A_00321700	fam-g protein (fragment)
PGAL8A_00322000	fam-g protein
PGAL8A_00322150	fam-g protein
PGAL8A_00322200	fam-g protein (fragment)
PGAL8A_00322400	fam-g protein
PGAL8A_00322500	fam-g protein
PGAL8A_00322600	fam-g protein
PGAL8A_00322700	fam-g protein
PGAL8A_00322800	fam-g protein
PGAL8A_00322900	fam-g protein
PGAL8A_00323000	fam-g protein
PGAL8A_00323500	fam-g protein
PGAL8A_00323600	fam-g protein
PGAL8A_00323700	fam-g protein
PGAL8A_00323800	fam-g protein
PGAL8A_00323900	fam-g protein
PGAL8A_00324300	fam-g protein
PGAL8A_00324400	fam-g protein
PGAL8A_00324500	fam-g protein
PGAL8A_00325700	fam-g protein
PGAL8A_00325800	fam-g protein
PGAL8A_00325900	fam-g protein
PGAL8A_00326000	fam-g protein
PGAL8A_00326100	fam-g protein
PGAL8A_00326200	fam-g protein
PGAL8A_00326300	fam-g protein (fragment)
PGAL8A_00326400	fam-g protein
PGAL8A_00326600	fam-g protein (fragment)
PGAL8A_00326800	fam-g protein
PGAL8A_00326900	fam-g protein
PGAL8A_00327000	fam-g protein
PGAL8A_00327100	fam-g protein
PGAL8A_00327300	fam-g protein
PGAL8A_00328700	fam-g protein
PGAL8A_00328900	fam-g protein
PGAL8A_00329000	fam-g protein
PGAL8A_00329100	fam-g protein
PGAL8A_00329200	fam-g protein
PGAL8A_00378100	fam-g protein
PGAL8A_00378200	fam-g protein (fragment)
PGAL8A_00378300	fam-g protein
PGAL8A_00412900	fam-g protein
PGAL8A_00413000	fam-g protein
PGAL8A_00413100	fam-g protein
PGAL8A_00413400	fam-g protein
PGAL8A_00413500	fam-g protein
PGAL8A_00413600	fam-g protein
PGAL8A_00449600	fam-g protein
PGAL8A_00449700	fam-g protein (fragment)
PGAL8A_00449900	fam-g protein
PGAL8A_00450000	fam-g protein
PGAL8A_00450100	fam-g protein
PGAL8A_00475000	fam-g protein
PGAL8A_00497700	fam-g protein
PGAL8A_00497800	fam-g protein
PGAL8A_00498000	fam-g protein
PGAL8A_00498100	fam-g protein

## Sheet: fam-h protein
Supplemental Table S6: Multigene families in the genome of P. gallinaceum 8A and P. relictum SGS1; fam-h protein (2-exon protein, PEXEL)
Gene Models (IDs) and Protein annotation
P. gallinaceum gene	Protein annotation	P. relictum gene	Protein annotation
PGAL8A_00177000	fam-h protein	PRELSG_0733900	fam-h protein
PGAL8A_00177100	fam-h protein	PRELSG_0000400	fam-h protein
		PRELSG_0001950	fam-h protein
		PRELSG_0002050	fam-h protein
		PRELSG_0002100	fam-h protein
		PRELSG_0002800	fam-h protein
		PRELSG_0003000	fam-h protein
		PRELSG_0003300	fam-h protein
		PRELSG_0003400	fam-h protein
		PRELSG_0004400	fam-h protein
		PRELSG_0004900	fam-h protein
		PRELSG_0005700	fam-h protein
		PRELSG_0005800	fam-h protein
		PRELSG_0005900	fam-h protein
		PRELSG_0006000	fam-h protein
		PRELSG_0006300	fam-h protein
		PRELSG_0006800	fam-h protein
		PRELSG_0007500	fam-h protein
		PRELSG_0012000	fam-h protein
		PRELSG_0012900	fam-h protein
		PRELSG_0013100	fam-h protein
		PRELSG_0013900	fam-h protein
		PRELSG_0015150	fam-h protein
		PRELSG_0015300	fam-h protein
		PRELSG_0016700	fam-h protein
		PRELSG_0017800	fam-h protein
		PRELSG_0018000	fam-h protein
		PRELSG_0021600	fam-h protein
		PRELSG_0021700	fam-h protein
		PRELSG_0021900	fam-h protein
		PRELSG_0024700	fam-h protein
		PRELSG_0024800	fam-h protein
		PRELSG_0025200	fam-h protein
		PRELSG_0025500	fam-h protein
		PRELSG_0025700	fam-h protein
		PRELSG_0025750	fam-h protein
		PRELSG_0027500	fam-h protein
		PRELSG_0029100	fam-h protein
		PRELSG_0030300	fam-h protein
		PRELSG_0030350	fam-h protein
		PRELSG_0030500	fam-h protein
		PRELSG_0031100	fam-h protein
		PRELSG_0031300	fam-h protein
		PRELSG_0031370	fam-h protein
		PRELSG_0031390	fam-h protein
		PRELSG_9900950	fam-h protein
		PRELSG_9901400	fam-h protein
		PRELSG_9902550	fam-h protein
		PRELSG_9902650	fam-h protein

## Sheet: fam-i protein
Supplemental Table S6: Multigene families in the genome of P. gallinaceum 8A and P. relictum SGS1; 2-exon gene family
Gene Models (IDs) and Protein annotation
P. gallinaceum gene	Protein annotation
PGAL8A_00000200	fam-i protein
PGAL8A_00053200	fam-i protein
PGAL8A_00178900	fam-i protein
PGAL8A_00180600	fam-i protein
PGAL8A_00264900	fam-i protein
PGAL8A_00267600	fam-i protein, fragment
PGAL8A_00269500	fam-i protein
PGAL8A_00270400	fam-i protein
PGAL8A_00270900	fam-i protein
PGAL8A_00271700	fam-i protein
PGAL8A_00272600	fam-i protein
PGAL8A_00320700	fam-i protein
PGAL8A_00321100	fam-i protein
PGAL8A_00323200	fam-i protein
PGAL8A_00324100	fam-i protein
PGAL8A_00327200	fam-i protein
PGAL8A_00376400	fam-i protein
PGAL8A_00376600	fam-i protein
PGAL8A_00411800	fam-i protein
PGAL8A_00412500	fam-i protein , fragment
PGAL8A_00412700	fam-i protein
PGAL8A_00450500	fam-i protein , fragment
PGAL8A_00450700	fam-i protein
PGAL8A_00474600	fam-i protein
PGAL8A_00497200	fam-i protein
PGAL8A_00497500	fam-i protein

## Sheet: PIR-like protein
Supplemental Table S6: Multigene families in the genome of P. gallinaceum 8A and P. relictum SGS1s; PIR-like protein
Gene Models (IDs) and Protein annotation
P. gallinaceum gene	Protein annotation	P. relictum gene	Protein annotation
PGAL8A_00053100	PIR-like protein (fragment)	PRELSG_0001800	PIR-like protein
PGAL8A_00178300	PIR-like protein	PRELSG_0007000	PIR-like protein
PGAL8A_00178400	PIR-like protein	PRELSG_0017600	PIR-like protein (fragment)
PGAL8A_00185800	PIR-like protein, pseudogene	PRELSG_0018100	PIR-like protein
PGAL8A_00194500	PIR-like protein	PRELSG_0028700	PIR-like protein
PGAL8A_00195300	PIR-like protein
PGAL8A_00264300	PIR-like protein
PGAL8A_00264400	PIR-like protein
PGAL8A_00266000	PIR-like protein
PGAL8A_00266200	PIR-like protein
PGAL8A_00266400	PIR-like protein
PGAL8A_00266500	PIR-like protein
PGAL8A_00268500	PIR-like protein
PGAL8A_00268600	PIR-like protein
PGAL8A_00268700	PIR-like protein
PGAL8A_00268900	PIR-like protein
PGAL8A_00269000	PIR-like protein
PGAL8A_00329800	PIR-like protein
PGAL8A_00377700	PIR-like protein
PGAL8A_00412100	PIR-like protein
PGAL8A_00413200	PIR-like protein
PGAL8A_00413300	PIR-like protein

## Sheet: Surfin
Supplemental Table S6: Multigene families in the genome of P. gallinaceum 8A and P. relictum SGS1; surface-associated interspersed protein (SURFIN)
Gene Models (IDs) and Protein annotation
P. gallinaceum gene	Protein annotation	P. relictum gene	Protein annotation
PGAL8A_00000100	surface-associated interspersed protein (SURFIN)	PRELSG_1349600	surface-associated interspersed protein (SURFIN), pseudogene
PGAL8A_00022000	surface-associated interspersed protein (SURFIN) (fragment)	PRELSG_0000200	surface-associated interspersed protein (SURFIN)
PGAL8A_00022200	surface-associated interspersed protein (SURFIN)	PRELSG_0000500	surface-associated interspersed protein (SURFIN)
PGAL8A_00022300	surface-associated interspersed protein (SURFIN) (fragment)	PRELSG_0001100	surface-associated interspersed protein (SURFIN)
PGAL8A_00040200	surface-associated interspersed protein (SURFIN) (fragment)	PRELSG_0001150	surface-associated interspersed protein (SURFIN), pseudogene
PGAL8A_00040500	surface-associated interspersed protein (SURFIN)	PRELSG_0001600	surface-associated interspersed protein (SURFIN)
PGAL8A_00040600	surface-associated interspersed protein (SURFIN) (fragment)	PRELSG_0001650	surface-associated interspersed protein (SURFIN), pseudogene
PGAL8A_00040700	surface-associated interspersed protein (SURFIN) (fragment)	PRELSG_0004650	surface-associated interspersed protein (SURFIN), pseudogene
PGAL8A_00040750	surface-associated interspersed protein (SURFIN) (fragment)	PRELSG_0005200	surface-associated interspersed protein (SURFIN), pseudogene
PGAL8A_00040800	surface-associated interspersed protein (SURFIN), pseudogene	PRELSG_0006700	surface-associated interspersed protein (SURFIN) (fragment)
PGAL8A_00042100	surface-associated interspersed protein (SURFIN)	PRELSG_0006900	surface-associated interspersed protein (SURFIN)
PGAL8A_00042400	surface-associated interspersed protein (SURFIN) (fragment)	PRELSG_0007400	surface-associated interspersed protein (SURFIN) (fragment)
PGAL8A_00077300	surface-associated interspersed protein (SURFIN) (fragment)	PRELSG_0007600	surface-associated interspersed protein (SURFIN) (fragment)
PGAL8A_00123100	surface-associated interspersed protein (SURFIN)	PRELSG_0007800	surface-associated interspersed protein (SURFIN) (fragment)
PGAL8A_00179000	surface-associated interspersed protein (SURFIN)	PRELSG_0012400	surface-associated interspersed protein (SURFIN)
PGAL8A_00179300	surface-associated interspersed protein (SURFIN) (fragment)	PRELSG_0013600	surface-associated interspersed protein (SURFIN), pseudogene
PGAL8A_00179400	surface-associated interspersed protein (SURFIN)	PRELSG_0013700	surface-associated interspersed protein (SURFIN)
PGAL8A_00179500	surface-associated interspersed protein (SURFIN) (fragment)	PRELSG_0014400	surface-associated interspersed protein (SURFIN)
PGAL8A_00179700	surface-associated interspersed protein (SURFIN)	PRELSG_0014500	surface-associated interspersed protein (SURFIN), pseudogene
PGAL8A_00179900	surface-associated interspersed protein (SURFIN)	PRELSG_0014800	surface-associated interspersed protein (SURFIN) (fragment)
PGAL8A_00186500	surface-associated interspersed protein (SURFIN), pseudogene	PRELSG_0015800	surface-associated interspersed protein (SURFIN)
PGAL8A_00190200	surface-associated interspersed protein (SURFIN)	PRELSG_0015900	surface-associated interspersed protein (SURFIN), pseudogene
PGAL8A_00190400	surface-associated interspersed protein (SURFIN)	PRELSG_0016800	surface-associated interspersed protein (SURFIN)
PGAL8A_00190500	surface-associated interspersed protein (SURFIN) (fragment)	PRELSG_0017100	surface-associated interspersed protein (SURFIN), pseudogene
PGAL8A_00190600	surface-associated interspersed protein (SURFIN) (fragment)	PRELSG_0017750	surface-associated interspersed protein (SURFIN), pseudogene
PGAL8A_00191700	surface-associated interspersed protein (SURFIN)	PRELSG_0019800	surface-associated interspersed protein (SURFIN)
PGAL8A_00194400	surface-associated interspersed protein (SURFIN)	PRELSG_0022100	surface-associated interspersed protein (SURFIN)
PGAL8A_00194600	surface-associated interspersed protein (SURFIN)	PRELSG_0022300	surface-associated interspersed protein (SURFIN) (fragment)
PGAL8A_00264100	surface-associated interspersed protein (SURFIN)	PRELSG_0022400	surface-associated interspersed protein (SURFIN) (fragment)
PGAL8A_00264200	surface-associated interspersed protein (SURFIN)	PRELSG_0023200	surface-associated interspersed protein (SURFIN)
PGAL8A_00264600	surface-associated interspersed protein (SURFIN), pseudogene	PRELSG_0023600	surface-associated interspersed protein (SURFIN) (fragment)
PGAL8A_00269100	surface-associated interspersed protein (SURFIN)	PRELSG_0023900	surface-associated interspersed protein (SURFIN) (fragment)
PGAL8A_00269400	surface-associated interspersed protein (SURFIN)	PRELSG_0024000	surface-associated interspersed protein (SURFIN), pseudogene
PGAL8A_00269800	surface-associated interspersed protein (SURFIN), pseudogene	PRELSG_0024900	surface-associated interspersed protein (SURFIN) (fragment)
PGAL8A_00270300	surface-associated interspersed protein (SURFIN)	PRELSG_0025600	surface-associated interspersed protein (SURFIN) (fragment)
PGAL8A_00270500	surface-associated interspersed protein (SURFIN)	PRELSG_0026900	surface-associated interspersed protein (SURFIN) (fragment)
PGAL8A_00270600	surface-associated interspersed protein (SURFIN) (fragment)	PRELSG_0027300	surface-associated interspersed protein (SURFIN) (fragment)
PGAL8A_00271000	surface-associated interspersed protein (SURFIN)	PRELSG_0028400	surface-associated interspersed protein (SURFIN), pseudogene
PGAL8A_00271100	surface-associated interspersed protein (SURFIN) (fragment)	PRELSG_0029300	surface-associated interspersed protein (SURFIN), pseudogene
PGAL8A_00271300	surface-associated interspersed protein (SURFIN)	PRELSG_0030200	surface-associated interspersed protein (SURFIN)
PGAL8A_00271800	surface-associated interspersed protein (SURFIN) (fragment)	PRELSG_0031200	surface-associated interspersed protein (SURFIN) (fragment)
PGAL8A_00320900	surface-associated interspersed protein (SURFIN)	PRELSG_0031500	surface-associated interspersed protein (SURFIN)
PGAL8A_00321000	surface-associated interspersed protein (SURFIN)	PRELSG_9900100	surface-associated interspersed protein (SURFIN) (fragment)
PGAL8A_00321400	surface-associated interspersed protein (SURFIN)	PRELSG_9900200	surface-associated interspersed protein (SURFIN) (fragment)
PGAL8A_00323300	surface-associated interspersed protein (SURFIN)	PRELSG_9900500	surface-associated interspersed protein (SURFIN) (fragment)
PGAL8A_00323400	surface-associated interspersed protein (SURFIN)	PRELSG_9900600	surface-associated interspersed protein (SURFIN) (fragment)
PGAL8A_00324000	surface-associated interspersed protein (SURFIN)	PRELSG_9901000	surface-associated interspersed protein (SURFIN) (fragment)
PGAL8A_00324700	surface-associated interspersed protein (SURFIN)	PRELSG_9901100	surface-associated interspersed protein (SURFIN) (fragment)
PGAL8A_00325000	surface-associated interspersed protein (SURFIN)	PRELSG_9901200	surface-associated interspersed protein (SURFIN) (fragment)
PGAL8A_00325500	surface-associated interspersed protein (SURFIN) (fragment)	PRELSG_9902600	surface-associated interspersed protein (SURFIN) (fragment)
PGAL8A_00327500	surface-associated interspersed protein (SURFIN) (fragment)
PGAL8A_00327600	surface-associated interspersed protein (SURFIN) (fragment)
PGAL8A_00328000	surface-associated interspersed protein (SURFIN) (fragment)
PGAL8A_00328100	surface-associated interspersed protein (SURFIN) (fragment)
PGAL8A_00328200	surface-associated interspersed protein (SURFIN)
PGAL8A_00328400	surface-associated interspersed protein (SURFIN)
PGAL8A_00329900	surface-associated interspersed protein (SURFIN) (fragment)
PGAL8A_00330000	surface-associated interspersed protein (SURFIN) (fragment)
PGAL8A_00376700	surface-associated interspersed protein (SURFIN)
PGAL8A_00377400	surface-associated interspersed protein (SURFIN)
PGAL8A_00377900	surface-associated interspersed protein (SURFIN)
PGAL8A_00378000	surface-associated interspersed protein (SURFIN) (fragment)
PGAL8A_00411200	surface-associated interspersed protein (SURFIN) (fragment)
PGAL8A_00411300	surface-associated interspersed protein (SURFIN) (fragment)
PGAL8A_00411700	surface-associated interspersed protein (SURFIN)
PGAL8A_00412400	surface-associated interspersed protein (SURFIN) (fragment)
PGAL8A_00412600	surface-associated interspersed protein (SURFIN) (fragment)
PGAL8A_00412800	surface-associated interspersed protein (SURFIN)
PGAL8A_00450800	surface-associated interspersed protein (SURFIN)
PGAL8A_00473800	surface-associated interspersed protein (SURFIN) (fragment)
PGAL8A_00474000	surface-associated interspersed protein (SURFIN) (fragment)
PGAL8A_00474100	surface-associated interspersed protein (SURFIN) (fragment)
PGAL8A_00474400	surface-associated interspersed protein (SURFIN) (fragment)
PGAL8A_00474700	surface-associated interspersed protein (SURFIN)
PGAL8A_00497300	surface-associated interspersed protein (SURFIN) (fragment)
PGAL8A_00497600	surface-associated interspersed protein (SURFIN) (fragment)
PGAL8A_00498200	surface-associated interspersed protein (SURFIN) (fragment)
PGAL8A_00498300	surface-associated interspersed protein (SURFIN)
