# Supplementary material for: Complete avian malaria parasite genomes reveal features associated with lineage-specific evolution in birds and mammals
Source: Genome Res. 2018 Apr;28(4):547–60. doi: 10.1101/gr.218123.116 (PMC5880244; doi:10.1101/gr.218123.116)
Supplement: Supplemental Material [file supp_gr.218123.116_Supplemental_Table_S7.xlsx]

## Sheet: Supp Tab S7
Supplemental Table S7: Gene summary of P. gallinaceum
To each gene we include the functional annotation, amount of exons, gene length and expression data (in RPKM, Reads Per Kilobase of transcript per Million mapped reads). If available we further state the one to one orthologous to P. relictum and P. falciparum. Also reported is if a gene has Pexel, transmembrane domains, signal peptides or Pfam domains.
P. gallinaceum gene	Protein annotation	Exons	Gene length (bp)	Gene expression (RPKM)	Orthologue in P. relictum	Orthologue in P. falciparum	Pexel score	Trans-membrane domains	Singal Peptide score	Pfam domains
PGAL8A_00000100	surface-associated interspersed protein (SURFIN)	3	4575	0.609				1
PGAL8A_00000200	fam-i protein	2	708	2.322				0
PGAL8A_00000300	hypothetical protein	2	333	14.67			2.6337	1
PGAL8A_00000400	Plasmodium exported protein, unknown function	2	687	17.531			3.2067	1
PGAL8A_00000500	reticulocyte binding protein, putative	1	372	2.96				1
PGAL8A_00000600	hypothetical protein	2	411	32.653				1
PGAL8A_00000700	hypothetical protein	2	408	3.046				1
PGAL8A_00000800	Plasmodium exported protein, unknown function	2	612	17.854			5.62654	0	17
PGAL8A_00000900	Plasmodium exported protein, unknown function	2	588	1.819	PRELSG_0000800			0
PGAL8A_00001000	early transcribed membrane protein	1	1203	8.135	PRELSG_0616900			1		Pfam:PF09716.5(ETRAMP)
PGAL8A_00001100	hypothetical protein	2	852	285.685	PRELSG_0029350			2	24
PGAL8A_00001200	Plasmodium exported protein, unknown function	2	855	6.496				1
PGAL8A_00001300	early transcribed membrane protein	1	576	73.502		PF3D7_0936100		2		Pfam:PF09716.5(ETRAMP)
PGAL8A_00001400	hypothetical protein	2	1794	14.558				0
PGAL8A_00001500	conserved Plasmodium protein, unknown function	1	1113	5.958	PRELSG_0833500	PF3D7_0301900		1
PGAL8A_00001600	pre-mRNA-splicing factor PRP46, putative	3	1788	41.968	PRELSG_0833400	PF3D7_0302000		0		Pfam:PF00400.27(WD40)
PGAL8A_00001700	serine/threonine protein kinase, putative	1	4062	167.27	PRELSG_0833300	PF3D7_0302100		0		Pfam:PF00069.20(Pkinase)
PGAL8A_00001800	cytoadherence linked asexual protein 3.2,putative	9	4212	430.924				2	25	Pfam:PF03805.8(CLAG)
PGAL8A_00001900	ABC transporter B family member 4, putative	1	3819	10.299	PRELSG_0833100	PF3D7_0302600		5	19	Pfam:PF00005.22(ABC_tran),Pfam:PF00664.18(ABC_membrane)
PGAL8A_00002000	CDGSH iron-sulfur domain-containing protein,putative	3	456	29.378	PRELSG_0833000	PF3D7_0302700		0		Pfam:PF09360.5(zf-CDGSH)
PGAL8A_00002100	conserved Plasmodium protein, unknown function	2	1332	71.992	PRELSG_0832900	PF3D7_0302800		0
PGAL8A_00002200	exportin-1, putative	3	3687	126.954	PRELSG_0832800	PF3D7_0302900		0		Pfam:PF03810.14(IBN_N),Pfam:PF08389.7(Xpo1),Pfam:PF08767.6(CRM1_C)
PGAL8A_00002300	N-ethylmaleimide-sensitive fusion protein,putative	1	2307	40.205	PRELSG_0832700	PF3D7_0303000		0		Pfam:PF00004.24(AAA),Pfam:PF02933.12(CDC48_2)
PGAL8A_00002400	conserved Plasmodium protein, unknown function	1	3669	23.409	PRELSG_0832600	PF3D7_0303100		0
PGAL8A_00002500	HAD superfamily protein, putative	5	2736	78.475	PRELSG_0832500	PF3D7_0303200		0		Pfam:PF04571.9(Lipin_N),Pfam:PF08235.8(LNS2)
PGAL8A_00002600	DNA-directed RNA polymerases I, II, and IIIsubunit RPABC2, putative	2	456	46.992	PRELSG_0832400	PF3D7_0303300		0		Pfam:PF01192.17(RNA_pol_Rpb6)
PGAL8A_00002700	palmitoyltransferase DHHC1, putative	8	1830	33.117	PRELSG_0832300	PF3D7_0303400		4		Pfam:PF01529.15(zf-DHHC),Pfam:PF12796.2(Ank_2)
PGAL8A_00002800	spindle pole body protein, putative	1	5364	58.053	PRELSG_0832200	PF3D7_0303500		0		Pfam:PF04130.8(Spc97_Spc98)
PGAL8A_00002900	plasmoredoxin, putative	1	531	14.518	PRELSG_0832100	PF3D7_0303600		0		Pfam:PF13905.1(Thioredoxin_8)
PGAL8A_00003000	lipoamide acyltransferase component ofbranched-chain alpha-keto acid dehydrogenase complex,putative	1	1416	151.168	PRELSG_0832000	PF3D7_0303700		0		Pfam:PF00198.18(2-oxoacid_dh),Pfam:PF00364.17(Biotin_lipoyl)
PGAL8A_00003100	IBR domain protein, putative	1	1689	15.053	PRELSG_0831900	PF3D7_0303800		0		Pfam:PF01485.16(IBR)
PGAL8A_00003200	phosphatidylethanolamine-binding protein,putative	3	582	4.758	PRELSG_0831800	PF3D7_0303900		0		Pfam:PF01161.15(PBP)
PGAL8A_00003300	inner membrane complex protein 1a, putative	5	2433	1.09	PRELSG_0831700	PF3D7_0304000		0		Pfam:PF12314.3(IMCp)
PGAL8A_00003400	inner membrane complex protein 1e, putative	1	1452	77.175	PRELSG_0831600	PF3D7_0304100		0		Pfam:PF12314.3(IMCp)
PGAL8A_00003500	EH domain-containing protein, putative	1	1578	43.285	PRELSG_0831500	PF3D7_0304200		0		Pfam:PF00350.18(Dynamin_N),Pfam:PF12763.2(EF-hand_4)
PGAL8A_00003600	conserved Plasmodium protein, unknown function	1	3528	14.596	PRELSG_0831400	PF3D7_0304300		0
PGAL8A_00003700	60S ribosomal protein L44, putative	2	312	736.094	PRELSG_0831300	PF3D7_0304400		0		Pfam:PF00935.14(Ribosomal_L44)
PGAL8A_00003800	1-cys-glutaredoxin-like protein-1, putative	3	507	13.39	PRELSG_0831200	PF3D7_0304500		0		Pfam:PF00462.19(Glutaredoxin)
PGAL8A_00003900	circumsporozoite (CS) protein, putative	1	1518	0.705	PRELSG_0831100	PF3D7_0304600	2.45573	1	16	Pfam:PF00090.14(TSP_1)
PGAL8A_00004000	conserved Plasmodium protein, unknown function	3	1233	76.874	PRELSG_0831000		2.24614	0
PGAL8A_00004100	conserved Plasmodium membrane protein, unknownfunction	1	3741	2.406	PRELSG_0830900	PF3D7_0304800		6
PGAL8A_00004200	conserved Plasmodium protein, unknown function	1	513	7.253	PRELSG_0830800	PF3D7_0304900		0
PGAL8A_00004300	elongation factor ts, putative	2	1071	39.509	PRELSG_0830700	PF3D7_0305000		0	21	Pfam:PF00889.14(EF_TS)
PGAL8A_00004400	conserved Plasmodium protein, unknown function	1	11292	47.102	PRELSG_0830600	PF3D7_0305100		8
PGAL8A_00004500	conserved Plasmodium protein, unknown function	1	5340	90.47	PRELSG_0830500	PF3D7_0305200		0
PGAL8A_00004600	conserved Plasmodium membrane protein, unknownfunction	3	1815	15.915	PRELSG_0830400	PF3D7_0305300		12
PGAL8A_00004700	conserved Plasmodium protein, unknown function	2	366	97.127	PRELSG_0830300	PF3D7_0305400		0
PGAL8A_00004800	conserved Plasmodium protein, unknown function	1	9075	22.562	PRELSG_0830200	PF3D7_0305500		2		Pfam:PF04118.9(Dopey_N)
PGAL8A_00004900	AP endonuclease (DNA-[apurinic or apyrimidinicsite] lyase), putative	1	1581	58.026	PRELSG_0830100	PF3D7_0305600		0		Pfam:PF03372.18(Exo_endo_phos)
PGAL8A_00005000	ubiquitin-conjugating enzyme E2, putative	3	429	230.823	PRELSG_0830000	PF3D7_0305700		0		Pfam:PF00179.21(UQ_con)
PGAL8A_00005100	P-loop containing nucleoside triphosphatehydrolase, putative	1	3123	11.383	PRELSG_0829900	PF3D7_0305800		0		Pfam:PF05186.8(Dpy-30),Pfam:PF13207.1(AAA_17)
PGAL8A_00005200	conserved Plasmodium protein, unknown function	1	474	4.365	PRELSG_0829800	PF3D7_0305900		2
PGAL8A_00005300	conserved Plasmodium protein, unknown function	1	411	19.331	PRELSG_0829700	PF3D7_0306000		1
PGAL8A_00005400	conserved Plasmodium protein, unknown function	2	3453	92.302	PRELSG_0829600	PF3D7_0306100		0
PGAL8A_00005500	activator of Hsp90 ATPase, putative	5	1041	79.148	PRELSG_0829500	PF3D7_0306200		0		Pfam:PF09229.6(Aha1_N)
PGAL8A_00005600	glutaredoxin 1, putative	5	330	146.316	PRELSG_0829400	PF3D7_0306300		0		Pfam:PF00462.19(Glutaredoxin)
PGAL8A_00005700	FAD-dependent glycerol-3-phosphate dehydrogenase,putative	1	1860	69.03	PRELSG_0829300	PF3D7_0306400		1		Pfam:PF01266.19(DAO)
PGAL8A_00005800	conserved Plasmodium protein, unknown function	1	843	126.685	PRELSG_0829200	PF3D7_0306500		1
PGAL8A_00005900	conserved Plasmodium protein, unknown function	1	258	14.788	PRELSG_0829100	PF3D7_0306600		0
PGAL8A_00006000	membrane magnesium transporter, putative	4	351	35.186	PRELSG_0829000	PF3D7_0306700		2		Pfam:PF10270.4(MMgT)
PGAL8A_00006100	T-complex protein 1 subunit beta, putative	1	1599	263.155	PRELSG_0828900	PF3D7_0306800		0		Pfam:PF00118.19(Cpn60_TCP1)
PGAL8A_00006200	40S ribosomal protein S23, putative	3	438	322.686	PRELSG_0828700	PF3D7_0306900		0		Pfam:PF00164.20(Ribosom_S12_S23)
PGAL8A_00006400	40S ribosomal protein S12, putative	2	426	542.306	PRELSG_0828600	PF3D7_0307100		0		Pfam:PF01248.21(Ribosomal_L7Ae)
PGAL8A_00006500	60S ribosomal protein L7, putative	3	774	690.846	PRELSG_0828500	PF3D7_0307200		0		Pfam:PF00327.15(Ribosomal_L30),Pfam:PF08079.7(Ribosomal_L30_N)
PGAL8A_00006600	EB1 homolog, putative	1	1254	28.467	PRELSG_0828400	PF3D7_0307300		0		Pfam:PF00307.26(CH),Pfam:PF03271.12(EB1)
PGAL8A_00006700	hypothetical protein	2	1401	51.803	PRELSG_0828300			0
PGAL8A_00006800	ATP-dependent Clp protease proteolytic subunit,putative	1	1011	18.394	PRELSG_0828200	PF3D7_0307400		0	21	Pfam:PF00574.18(CLP_protease)
PGAL8A_00006900	conserved protein, unknown function	4	918	108.297	PRELSG_0828100	PF3D7_0307500		0
PGAL8A_00007000	conserved Plasmodium protein, unknown function	3	1704	17.544	PRELSG_0828000	PF3D7_0307600		0
PGAL8A_00007100	conserved Plasmodium protein, unknown function	7	4701	134.074	PRELSG_0827900	PF3D7_0307700		0
PGAL8A_00007200	conserved Plasmodium protein, unknown function	1	1938	58.292	PRELSG_0827800	PF3D7_0307800		0
PGAL8A_00007300	conserved Plasmodium protein, unknown function	3	11478	7.938	PRELSG_0827700	PF3D7_0307900		0
PGAL8A_00007400	DNA polymerase delta small subunit, putative	1	1350	91.152	PRELSG_0827600	PF3D7_0308000		0		Pfam:PF04042.11(DNA_pol_E_B)
PGAL8A_00007500	conserved Plasmodium protein, unknown function	1	5586	132.41	PRELSG_0827500	PF3D7_0308100		0		Pfam:PF00643.19(zf-B_box)
PGAL8A_00007600	T-complex protein 1 subunit eta, putative	2	1620	195.938	PRELSG_0827400	PF3D7_0308200		0		Pfam:PF00118.19(Cpn60_TCP1)
PGAL8A_00007700	conserved Plasmodium protein, unknown function	1	816	8.368	PRELSG_0827300	PF3D7_0308300		0
PGAL8A_00007900	activator of Hsp90 ATPase, putative	3	423	68.269	PRELSG_0827100	PF3D7_0308500		0		Pfam:PF08327.6(AHSA1)
PGAL8A_00008000	pre-mRNA-processing factor 19, putative	1	1497	54.986	PRELSG_0827000	PF3D7_0308600		0		Pfam:PF00400.27(WD40),Pfam:PF08606.6(Prp19)
PGAL8A_00008100	conserved Plasmodium protein, unknown function	2	1302	34.678	PRELSG_0826900	PF3D7_0308700		0
PGAL8A_00008200	conserved protein, unknown function	2	327	18.163	PRELSG_0826800	PF3D7_0308800		0
PGAL8A_00008300	splicing factor 3B subunit 1, putative	1	3846	57.642	PRELSG_0826700	PF3D7_0308900		0		Pfam:PF08920.5(SF3b1)
PGAL8A_00008400	dual specificity protein phosphatase, putative	6	1566	26.764	PRELSG_0826600	PF3D7_0309000		0		Pfam:PF00782.15(DSPc)
PGAL8A_00008500	conserved Plasmodium protein, unknown function	5	531	21.022	PRELSG_0826500	PF3D7_0309100		0	19
PGAL8A_00008600	serine/threonine protein kinase, putative	3	5085	55.744	PRELSG_0826400	PF3D7_0309200		0		Pfam:PF00069.20(Pkinase)
PGAL8A_00008700	N2227-like protein, putative	2	2370	63.732	PRELSG_0826300	PF3D7_0309300		0		Pfam:PF07942.7(N2227)
PGAL8A_00008800	asparagine synthetase [glutamine-hydrolyzing],putative	2	1731	581.318	PRELSG_0826200	PF3D7_0309500		0		Pfam:PF00733.16(Asn_synthase),Pfam:PF13537.1(GATase_7)
PGAL8A_00008900	60S acidic ribosomal protein P2, putative	1	336	231.101	PRELSG_0826100	PF3D7_0309600		0		Pfam:PF00428.14(Ribosomal_60s)
PGAL8A_00009000	SECIS-binding protein 2, putative	1	1305	8.656	PRELSG_0826000	PF3D7_0309700		0		Pfam:PF01248.21(Ribosomal_L7Ae)
PGAL8A_00009100	YTH domain-containing protein, putative	7	834	12.498	PRELSG_0825900	PF3D7_0309800		0		Pfam:PF04146.10(YTH)
PGAL8A_00009200	conserved Plasmodium protein, unknown function	3	4188	19.555	PRELSG_0825800	PF3D7_0309900		2
PGAL8A_00009300	50S ribosomal protein L9, apicoplast, putative	3	588	23.238	PRELSG_0825700	PF3D7_0310000		1		Pfam:PF01281.14(Ribosomal_L9_N)
PGAL8A_00009400	calcium dependent protein kinase 3, putative	5	1665	1.885	PRELSG_0825600	PF3D7_0310100		0		Pfam:PF00069.20(Pkinase),Pfam:PF13499.1(EF-hand_7)
PGAL8A_00009500	phd finger protein, putative	1	14928	65.335	PRELSG_0825500	PF3D7_0310200		0		Pfam:PF13771.1(zf-HC5HC2H),Pfam:PF13831.1(PHD_2),Pfam:PF13832.1(zf-HC5HC2H_2)
PGAL8A_00009600	phosphoglycerate mutase, putative	2	3036	187.652	PRELSG_0825400	PF3D7_0310300		0		Pfam:PF00300.17(His_Phos_1)
PGAL8A_00009700	parasite-infected erythrocyte surface protein,putative	1	3093	67.291	PRELSG_0825300	PF3D7_0310400		0	19	Pfam:PF02434.11(Fringe)
PGAL8A_00009800	ATP-dependent RNA helicase DHX57, putative	1	6768	56.732	PRELSG_0825200	PF3D7_0310500		2		Pfam:PF00270.24(DEAD),Pfam:PF00271.26(Helicase_C)
PGAL8A_00009900	eukaryotic translation initiation factor 3subunit K, putative	2	705	170.942	PRELSG_0825100	PF3D7_0310600		0		Pfam:PF03399.11(SAC3_GANP)
PGAL8A_00010000	trafficking protein particle complex subunit 4,putative	2	438	59.047	PRELSG_0825000	PF3D7_0310700		0		Pfam:PF04099.7(Sybindin)
PGAL8A_00010100	conserved Plasmodium protein, unknown function	1	330	20.81	PRELSG_0824900	PF3D7_0310800		2
PGAL8A_00010200	conserved Plasmodium protein, unknown function	1	2130	127.352	PRELSG_0824800	PF3D7_0310900		0
PGAL8A_00010300	conserved Plasmodium protein, unknown function	2	567	3.774	PRELSG_0824700	PF3D7_0311000		2
PGAL8A_00010400	pre-mRNA splicing factor, putative	6	1584	92.311	PRELSG_0824600	PF3D7_0311100		0		Pfam:PF01480.12(PWI)
PGAL8A_00010500	valine--tRNA ligase, putative	2	3663	18.402	PRELSG_0824500	PF3D7_0311200		0	19	Pfam:PF00133.17(tRNA-synt_1),Pfam:PF08264.8(Anticodon_1)
PGAL8A_00010600	phosphatidylinositol 3- and 4-kinase, putative	4	2760	69.992	PRELSG_0824400	PF3D7_0311300		0		Pfam:PF00454.22(PI3_PI4_kinase)
PGAL8A_00010700	protein kinase, putative	2	8928	36.353	PRELSG_0824300	PF3D7_0311400		0
PGAL8A_00010800	conserved Plasmodium protein, unknown function	1	243	6.442	PRELSG_0824200	PF3D7_0311500		2
PGAL8A_00010900	conserved Plasmodium protein, unknown function	5	1971	10.596	PRELSG_0824100	PF3D7_0311600		1	20	Pfam:PF04597.9(Ribophorin_I)
PGAL8A_00011000	plasmepsin VI, putative	15	1290	20.459	PRELSG_0824000	PF3D7_0311700		1		Pfam:PF00026.18(Asp)
PGAL8A_00011100	conserved protein, unknown function	3	1701	590.035	PRELSG_0823900	PF3D7_0311800		0
PGAL8A_00011200	conserved Plasmodium protein, unknown function	1	2034	4.436	PRELSG_0823800	PF3D7_0311900		0
PGAL8A_00011300	conserved Plasmodium protein, unknown function	4	411	15.518	PRELSG_0823700	PF3D7_0312000		0		Pfam:PF01381.17(HTH_3)
PGAL8A_00011400	RING zinc finger protein, putative	1	2238	27.283	PRELSG_0823600	PF3D7_0312100		5		Pfam:PF13639.1(zf-RING_2)
PGAL8A_00011500	TPR Domain containing protein, putative	1	3225	18.258	PRELSG_0823500	PF3D7_0312200		0		Pfam:PF00515.23(TPR_1),Pfam:PF13414.1(TPR_11)
PGAL8A_00011600	glycogen synthase kinase 3, putative	7	1332	89.732	PRELSG_0823300	PF3D7_0312400		0		Pfam:PF00069.20(Pkinase)
PGAL8A_00011700	major facilitator superfamily-relatedtransporter, putative	1	1818	6.915	PRELSG_0823200	PF3D7_0312500		11
PGAL8A_00012000	60S ribosomal protein L26, putative	3	384	331.907	PRELSG_0822900	PF3D7_0312800		0		Pfam:PF00467.24(KOW)
PGAL8A_00012100	hypothetical protein	2	816	2.092	PRELSG_0822800			0
PGAL8A_00012200	conserved Plasmodium protein, unknown function	2	1605	54.127	PRELSG_0822700	PF3D7_0313000		0
PGAL8A_00012300	ubiquitin-protein ligase, putative	4	2187	23.603	PRELSG_0822600	PF3D7_0313100		0	21	Pfam:PF08238.7(Sel1)
PGAL8A_00012400	conserved Plasmodium protein, unknown function	1	699	32.681	PRELSG_0822500	PF3D7_0313200		0
PGAL8A_00012500	apicoplast conserved ycf19 protein precursor,unknown function	5	579	7.907	PRELSG_0822400	PF3D7_0313300		2		Pfam:PF02325.12(YGGT)
PGAL8A_00012600	conserved Plasmodium protein, unknown function	1	1749	9.782	PRELSG_0822300	PF3D7_0313400		0		Pfam:PF00004.24(AAA)
PGAL8A_00012700	Ras-like G protein, putative	1	2406	16.959	PRELSG_0822200	PF3D7_0313500		0		Pfam:PF01926.18(MMR_HSR1),Pfam:PF14714.1(KH_dom-like)
PGAL8A_00012800	conserved Plasmodium protein, unknown function	6	2448	47.613	PRELSG_0822100	PF3D7_0313600		0
PGAL8A_00012900	conserved Plasmodium protein, unknown function	17	1542	34.603	PRELSG_0822000	PF3D7_0313700		0
PGAL8A_00013000	conserved Plasmodium protein, unknown function	7	1710	62.232	PRELSG_0821900	PF3D7_0313800		0	22
PGAL8A_00013100	conserved Plasmodium protein, unknown function	1	2763	12.154	PRELSG_0821800	PF3D7_0313900		4
PGAL8A_00013200	co-chaperone p23, putative	7	1068	200.513	PRELSG_0821700	PF3D7_0314000		1	21
PGAL8A_00013300	vesicle transport v-SNARE protein, putative	8	588	16.358	PRELSG_0821600	PF3D7_0314100		1
PGAL8A_00013400	conserved Plasmodium protein, unknown function	1	1095	3.865	PRELSG_0821500			1
PGAL8A_00013500	conserved Plasmodium protein, unknown function	1	3564	15.98	PRELSG_0821400	PF3D7_0314200		0
PGAL8A_00013600	DER1-like protein, putative	1	1098	8.175	PRELSG_0821300	PF3D7_0314300		3	19	Pfam:PF04511.10(DER1)
PGAL8A_00013700	serine/threonine protein phosphatase 6, putative	1	927	90.01	PRELSG_0821200	PF3D7_0314400		0		Pfam:PF00149.23(Metallophos)
PGAL8A_00013800	conserved Plasmodium protein, unknown function	2	669	40.296	PRELSG_0821100	PF3D7_0314500		0
PGAL8A_00013900	conserved Plasmodium protein, unknown function	1	726	37.079	PRELSG_0821000	PF3D7_0314600		0
PGAL8A_00014000	zinc finger protein, putative	1	3117	125.048	PRELSG_0820900	PF3D7_0314700		0		Pfam:PF13639.1(zf-RING_2)
PGAL8A_00014100	conserved Plasmodium protein, unknown function	1	837	148.551	PRELSG_0411700	PF3D7_0210900		0
PGAL8A_00014200	hypothetical protein	1	2055	22.317	PRELSG_0411800			0
PGAL8A_00014300	conserved Plasmodium protein, unknown function	1	1149	5.333	PRELSG_0411900	PF3D7_0210800	0.865291	3
PGAL8A_00014400	syntaxin, Qa-SNARE family, putative	1	942	46.238	PRELSG_0412000	PF3D7_0210700		1		Pfam:PF14523.1(Syntaxin_2)
PGAL8A_00014500	conserved Plasmodium protein, unknown function	5	1344	11.425	PRELSG_0412100	PF3D7_0210600	3.65133	0
PGAL8A_00014600	conserved Plasmodium protein, unknown function	1	3705	18.066	PRELSG_0412200	PF3D7_0210500		0
PGAL8A_00014700	50S ribosomal protein L33, putative	4	360	128.136	PRELSG_0412300	PF3D7_0210400		0		Pfam:PF00471.15(Ribosomal_L33)
PGAL8A_00014800	monocarboxylate transporter, putative	2	1374	17.851	PRELSG_0412400	PF3D7_0210300		12		Pfam:PF07690.11(MFS_1)
PGAL8A_00014900	conserved Plasmodium protein, unknown function	2	6447	72.267	PRELSG_0412500	PF3D7_0210200		0
PGAL8A_00015000	60S ribosomal protein L37ae, putative	3	291	277.651	PRELSG_0412600	PF3D7_0210100		0		Pfam:PF01780.14(Ribosomal_L37ae)
PGAL8A_00015100	secretory complex protein 61 gamma subunit,putative	1	249	13.901	PRELSG_0412700	PF3D7_0210000		1		Pfam:PF00584.15(SecE)
PGAL8A_00015200	ATP-dependent RNA helicase UAP56, putative	2	1431	627.574	PRELSG_0412800	PF3D7_0209800		0		Pfam:PF00270.24(DEAD),Pfam:PF00271.26(Helicase_C)
PGAL8A_00015300	RING zinc finger protein, putative	1	1443	58.603	PRELSG_0412900	PF3D7_0209700		0		Pfam:PF13639.1(zf-RING_2)
PGAL8A_00015400	transporter, putative	8	2940	26.189	PRELSG_0413000	PF3D7_0209600		14		Pfam:PF00209.13(SNF)
PGAL8A_00015500	conserved Plasmodium protein, unknown function	1	1494	1.343	PRELSG_0413100	PF3D7_0209500		0
PGAL8A_00015600	conserved protein, unknown function	7	1353	63.118	PRELSG_0413200	PF3D7_0209400		0		Pfam:PF01937.14(DUF89)
PGAL8A_00015700	2C-methyl-D-erythritol 2,4-cyclodiphosphatesynthase, putative	2	702	22.524	PRELSG_0413300	PF3D7_0209300		0	23	Pfam:PF02542.11(YgbB)
PGAL8A_00015800	3'exoribonuclease, putative	8	789	14.357	PRELSG_0413400	PF3D7_0209200		0		Pfam:PF01138.16(RNase_PH)
PGAL8A_00015900	phospholipase A2, putative	3	2007	58.295	PRELSG_0413500	PF3D7_0209100		0		Pfam:PF01734.17(Patatin)
PGAL8A_00016000	transmission-blocking target antigen s230,putative	1	8544	372.623	PRELSG_0413600	PF3D7_0209000		0		Pfam:PF07422.8(s48_45)
PGAL8A_00016100	transmission-blocking target antigen s230paralog, putative	1	6672	13.341	PRELSG_0413700	PF3D7_0208900		1		Pfam:PF07422.8(s48_45)
PGAL8A_00016200	conserved Plasmodium protein, unknown function	1	636	117.416	PRELSG_0413800	PF3D7_0208800		0	20
PGAL8A_00016300	conserved Plasmodium protein, unknown function	7	669	19.954	PRELSG_0413900	PF3D7_0208700		0		Pfam:PF03876.12(SHS2_Rpb7-N)
PGAL8A_00016400	ribosome-recycling factor, putative	1	1200	45.829	PRELSG_0414000	PF3D7_0208600		1		Pfam:PF01765.14(RRF)
PGAL8A_00016500	acyl carrier protein, putative	3	405	28.144	PRELSG_0414100	PF3D7_0208500		0	17	Pfam:PF00550.20(PP-binding)
PGAL8A_00016600	conserved Plasmodium protein, unknown function	1	5889	21.35	PRELSG_0414200	PF3D7_0208400		0
PGAL8A_00016700	conserved Plasmodium protein, unknown function	1	4644	5.62	PRELSG_0414300	PF3D7_0208300		2
PGAL8A_00016800	KRR1 small subunit processome component,putative	1	906	93.234	PRELSG_0414400	PF3D7_0208200		0
PGAL8A_00016900	conserved Plasmodium protein, unknown function	14	4554	61.656	PRELSG_0414500	PF3D7_0208100		0
PGAL8A_00017000	serine repeat antigen, putative	4	2874	5376.76	PRELSG_0414600			0	17	Pfam:PF00112.18(Peptidase_C1)
PGAL8A_00017100	serine repeat antigen, putative	5	2010	3.651				0		Pfam:PF00112.18(Peptidase_C1)
PGAL8A_00017200	iron-sulfur assembly protein, putative	1	495	12.523	PRELSG_0414800	PF3D7_0207200		0		Pfam:PF01521.15(Fe-S_biosyn)
PGAL8A_00017300	zinc finger protein, putative	4	2343	16.991	PRELSG_0414900			5
PGAL8A_00017400	conserved Plasmodium protein, unknown function	4	4713	41.958	PRELSG_0415000	PF3D7_0207100		0
PGAL8A_00017500	merozoite surface protein 4, putative	2	678	337.596	PRELSG_0415100	PF3D7_0207000	6.95082	0		Pfam:PF00008.22(EGF)
PGAL8A_00017600	merozoite surface protein 5, putative	2	1146	81.458	PRELSG_0415200		5.35603	0	20
PGAL8A_00017700	merozoite surface protein 2, putative	1	495	1827.35	PRELSG_0415300		7.97133	0	20
PGAL8A_00017800	adenylosuccinate lyase, putative	1	1413	99.124	PRELSG_0415400	PF3D7_0206700		0		Pfam:PF00206.15(Lyase_1),Pfam:PF08328.6(ASL_C)
PGAL8A_00017900	DNA-directed RNA polymerase III subunit RPC10,putative	2	321	13.527	PRELSG_0415500	PF3D7_0206600		0		Pfam:PF01096.13(TFIIS_C)
PGAL8A_00018000	conserved Plasmodium protein, unknown function	1	2469	30.115	PRELSG_0415600	PF3D7_0206500		0
PGAL8A_00018100	pantothenate transporter, putative	1	1617	10.693	PRELSG_0415700	PF3D7_0206200		10		Pfam:PF07690.11(MFS_1)
PGAL8A_00018200	cysteine desulfuration protein SufE, putative	4	729	11.989	PRELSG_0415800	PF3D7_0206100		1		Pfam:PF02657.10(SufE)
PGAL8A_00018300	DNA repair protein RAD2, putative	1	4833	58.985	PRELSG_0415900	PF3D7_0206000		0		Pfam:PF00752.12(XPG_N),Pfam:PF00867.13(XPG_I)
PGAL8A_00018400	26S proteasome regulatory subunit RPN1, putative	4	2817	201.763	PRELSG_0416000	PF3D7_0205900		0
PGAL8A_00018500	PH domain-containing protein, putative	3	363	11.464	PRELSG_0416100	PF3D7_0205800		0		Pfam:PF00169.24(PH)
PGAL8A_00018600	RNA-binding protein, putative	5	582	35.115	PRELSG_0416200	PF3D7_0205700		0
PGAL8A_00018700	conserved Plasmodium protein, unknown function	1	1842	15.502	PRELSG_0416300	PF3D7_0205600		0
PGAL8A_00018800	DNA-directed RNA polymerase II 16 kDa subunit,putative	3	399	23.836	PRELSG_0416400	PF3D7_0205500		0		Pfam:PF03874.11(RNA_pol_Rpb4)
PGAL8A_00018900	PCI domain-containing protein, putative	1	1341	34.68	PRELSG_0416500	PF3D7_0205400		0
PGAL8A_00019000	conserved Plasmodium protein, unknown function	6	1569	3.896	PRELSG_0416600	PF3D7_0205300		0
PGAL8A_00019100	conserved Plasmodium protein, unknown function	4	597	6.701	PRELSG_0416700	PF3D7_0205200		0		Pfam:PF02493.15(MORN)
PGAL8A_00019200	conserved Plasmodium protein, unknown function	4	2241	2.735	PRELSG_0416800	PF3D7_0205100		0
PGAL8A_00019300	conserved Plasmodium protein, unknown function	1	2547	3.666	PRELSG_0416900	PF3D7_0205000		0
PGAL8A_00019400	ubiE/COQ5 methyltransferase, putative	2	1074	17.242	PRELSG_0417000	PF3D7_0204900		0		Pfam:PF01209.13(Ubie_methyltran)
PGAL8A_00019500	3'-5' exonuclease, putative	1	1101	7.545	PRELSG_0417100	PF3D7_0204800		0		Pfam:PF01612.15(DNA_pol_A_exo1)
PGAL8A_00019600	hexose transporter, putative	1	1509	635.327	PRELSG_0417200	PF3D7_0204700		12		Pfam:PF00083.19(Sugar_tr)
PGAL8A_00019700	conserved Plasmodium protein, unknown function	1	2778	13.635	PRELSG_0417300	PF3D7_0204600		1	23	Pfam:PF03159.13(XRN_N)
PGAL8A_00019800	aspartate aminotransferase, putative	1	1218	13.66	PRELSG_0417400	PF3D7_0204500		0		Pfam:PF00155.16(Aminotran_1_2)
PGAL8A_00019900	dynein light chain, putative	4	324	5.56	PRELSG_0417500	PF3D7_0204400		0		Pfam:PF01221.13(Dynein_light)
PGAL8A_00020000	conserved Plasmodium protein, unknown function	1	1911	5.244	PRELSG_0417600	PF3D7_0204300		0
PGAL8A_00020100	conserved Plasmodium protein, unknown function	5	816	21.932	PRELSG_0417700	PF3D7_0204200		1
PGAL8A_00020200	conserved Plasmodium protein, unknown function	1	6078	94.583	PRELSG_0417800	PF3D7_0204100	2.29932	1	22	Pfam:PF08238.7(Sel1)
PGAL8A_00020300	conserved Plasmodium protein, unknown function	2	2004	19.156	PRELSG_0417900	PF3D7_0204000		0		Pfam:PF06278.6(DUF1032)
PGAL8A_00020400	5'-3' exonuclease, N-terminal resolvase-likedomain, putative	1	1281	7.32	PRELSG_0418000	PF3D7_0203900		0	22	Pfam:PF01367.15(5_3_exonuc),Pfam:PF02739.11(5_3_exonuc_N)
PGAL8A_00020500	conserved Plasmodium protein, unknown function	12	1614	21.733	PRELSG_0418100	PF3D7_0203800		0
PGAL8A_00020600	protein MAK16, putative	2	1068	52.119	PRELSG_0418200	PF3D7_0203700		0		Pfam:PF01778.12(Ribosomal_L28e)
PGAL8A_00020700	conserved Plasmodium protein, unknown function	1	1281	11.09	PRELSG_0418300	PF3D7_0203600		1
PGAL8A_00020900	conserved Plasmodium protein, unknown function	4	276	86.474	PRELSG_0418500	PF3D7_0203400		0
PGAL8A_00021000	ERCC1 nucleotide excision repair protein,putative	1	681	9.772	PRELSG_0418600	PF3D7_0203300		0		Pfam:PF03834.9(Rad10)
PGAL8A_00021100	conserved Plasmodium protein, unknown function	1	1491	13.807	PRELSG_0418700	PF3D7_0203200		0
PGAL8A_00021200	protein kinase, putative	1	6645	35.693	PRELSG_0418800	PF3D7_0203100		0		Pfam:PF00069.20(Pkinase)
PGAL8A_00021300	repetitive organellar protein, putative	1	4878	21.743	PRELSG_0418900	PF3D7_0203000		0
PGAL8A_00021400	palmitoyltransferase DHHC12, putative	10	864	9.314	PRELSG_0419000	PF3D7_0202900		3		Pfam:PF01529.15(zf-DHHC)
PGAL8A_00021500	conserved Plasmodium protein, unknown function	4	363	10.12	PRELSG_0419100	PF3D7_0202800		0		Pfam:PF08777.6(RRM_3)
PGAL8A_00021600	octaprenyl pyrophosphate synthase, putative	1	1515	13.267	PRELSG_0419200	PF3D7_0202700		0		Pfam:PF00348.12(polyprenyl_synt)
PGAL8A_00021700	conserved Plasmodium protein, unknown function	3	3306	59.729	PRELSG_0419300			0
PGAL8A_00021800	hypothetical protein	4	2691	8.568	PRELSG_0718600			0
PGAL8A_00021950	hypothetical protein	2	411					0
PGAL8A_00022000	surface-associated interspersed protein (SURFIN),fragment	1	804	0.284				0
PGAL8A_00022100	Plasmodium exported protein, unknown function	2	531	0.489			1.28802	2
PGAL8A_00022200	surface-associated interspersed protein (SURFIN)	2	4161	0.212				1
PGAL8A_00022300	surface-associated interspersed protein (SURFIN),fragment	1	402	0.489				0
PGAL8A_00022400	fam-g protein	2	306	2.314			1.0514	0	23
PGAL8A_00022500	ribose 5-phosphate epimerase, putative	4	645	10.296	PRELSG_1017300	PF3D7_0514600		0		Pfam:PF06026.9(Rib_5-P_isom_A)
PGAL8A_00022600	fam-e protein	2	972	6.327				1
PGAL8A_00022700	Plasmodium exported protein, unknown function	2	435	12.93			2.9905	1	22
PGAL8A_00022800	rhoptry-associated protein 2/3, putative	1	1182	613.557	PRELSG_1030900		2.43444	0	22
PGAL8A_00022900	anaphase promoting complex subunit, putative	1	1956	9.258	PRELSG_1030800	PF3D7_0501700		0		Pfam:PF00515.23(TPR_1),Pfam:PF13181.1(TPR_8)
PGAL8A_00023000	chromosome assembly factor 1, putative	1	3102	153.85	PRELSG_1030700	PF3D7_0501800		0		Pfam:PF00400.27(WD40)
PGAL8A_00023100	conserved protein, unknown function	2	1143	30.359	PRELSG_1030600	PF3D7_0501900		0		Pfam:PF06159.8(DUF974)
PGAL8A_00023200	vacuolar protein sorting-associated protein 11,putative	3	3156	10.753	PRELSG_1030500	PF3D7_0502000		0		Pfam:PF12451.3(VPS11_C)
PGAL8A_00023300	HCNGP-like protein, putative	1	1176	103.736	PRELSG_1030400	PF3D7_0502100		0		Pfam:PF07818.8(HCNGP)
PGAL8A_00023400	protein Mpv17, putative	2	1266	26.763	PRELSG_1030300	PF3D7_0502200		5		Pfam:PF04117.7(Mpv17_PMP22)
PGAL8A_00023500	conserved Plasmodium protein, unknown function	1	570	0.911	PRELSG_1030200	PF3D7_0502300		0
PGAL8A_00023600	merozoite surface protein 8, pseudogene	4	1548	0.518	PRELSG_1030100	PF3D7_0502400		1
PGAL8A_00023700	conserved Plasmodium protein, unknown function	1	1476	1.13	PRELSG_1030000	PF3D7_0502500		1	22
PGAL8A_00023800	conserved Plasmodium protein, unknown function	8	2424	5.319	PRELSG_1029900	PF3D7_0502600		0
PGAL8A_00023900	conserved Plasmodium protein, unknown function	2	1008	4.058	PRELSG_1029800	PF3D7_0502700		0
PGAL8A_00024000	DnaJ protein, putative	1	417	3.377	PRELSG_1029700	PF3D7_0502800		0		Pfam:PF00226.26(DnaJ),Pfam:PF05207.8(zf-CSL)
PGAL8A_00024100	mitochondrial inner membrane TIM10 associatedprotein, putative	3	249	19.208	PRELSG_1029600	PF3D7_0502900		0		Pfam:PF02953.10(zf-Tim10_DDP)
PGAL8A_00024200	50S ribosomal protein L28, apicoplast, putative	5	753	41.255	PRELSG_1029500	PF3D7_0503000		1		Pfam:PF00830.14(Ribosomal_L28)
PGAL8A_00024300	4-diphosphocytidyl-2-C-methyl-D-erythritolkinase, putative	1	1494	9.736	PRELSG_1029400	PF3D7_0503100		0	26
PGAL8A_00024400	conserved Plasmodium protein, unknown function	1	2613	62.763	PRELSG_1029300	PF3D7_0503200		0		Pfam:PF13401.1(AAA_22)
PGAL8A_00024500	cullin, putative	2	5517	1.143	PRELSG_1029200			0		Pfam:PF10557.4(Cullin_Nedd8)
PGAL8A_00024600	serine/arginine-rich splicing factor 12,putative	1	942	597.057	PRELSG_1029100	PF3D7_0503300		0		Pfam:PF00076.17(RRM_1)
PGAL8A_00024700	actin-depolymerizing factor 1, putative	2	369	33.278	PRELSG_1029000	PF3D7_0503400		0		Pfam:PF00241.15(Cofilin_ADF)
PGAL8A_00024800	protein kinase, putative	1	2391	23.109	PRELSG_1028900	PF3D7_0503500		0
PGAL8A_00024900	myosin B, putative	8	2397	14.581	PRELSG_1028800	PF3D7_0503600		0		Pfam:PF00063.16(Myosin_head)
PGAL8A_00025000	60S ribosomal protein L31, putative	3	360	501.727	PRELSG_1028700	PF3D7_0503800		0		Pfam:PF01198.14(Ribosomal_L31e)
PGAL8A_00025100	conserved Plasmodium protein, unknown function	2	1614	16.688	PRELSG_1028600	PF3D7_0503900		0
PGAL8A_00025200	cation transporting P-ATPase, putative	2	5766	59.189	PRELSG_1028500	PF3D7_0504000		12		Pfam:PF00122.15(E1-E2_ATPase)
PGAL8A_00025300	AN1-like zinc finger family protein	5	438	17.403	PRELSG_1028400	PF3D7_0504100		0		Pfam:PF01428.11(zf-AN1)
PGAL8A_00025400	ATP-dependent RNA helicase DDX27, putative	3	1437	20.556	PRELSG_1028300	PF3D7_0504200		1		Pfam:PF00270.24(DEAD),Pfam:PF00271.26(Helicase_C)
PGAL8A_00025500	conserved Plasmodium protein, unknown function	4	678	9.618	PRELSG_1028200	PF3D7_0504300		0
PGAL8A_00025600	ATP-dependent helicase, putative	1	2166	43.102	PRELSG_1028100	PF3D7_0504400		0		Pfam:PF00270.24(DEAD),Pfam:PF00271.26(Helicase_C)
PGAL8A_00025700	conserved Plasmodium protein, unknown function	6	828	38.963	PRELSG_1028000	PF3D7_0504500		2	23	Pfam:PF04536.9(TPM)
PGAL8A_00025800	2-oxoisovalerate dehydrogenase subunit beta,mitochondrial, putative	1	1116	462.556	PRELSG_1027900	PF3D7_0504600		0		Pfam:PF02779.19(Transket_pyr),Pfam:PF02780.15(Transketolase_C)
PGAL8A_00025900	centrosomal protein CEP120, putative	1	6915	121.019	PRELSG_1027800	PF3D7_0504700		0
PGAL8A_00026000	conserved Plasmodium protein, unknown function	1	14697	89.393	PRELSG_1027700	PF3D7_0504800		0
PGAL8A_00026100	conserved protein, unknown function	9	519	40.59	PRELSG_1027600	PF3D7_0504900		2		Pfam:PF05608.7(DUF778)
PGAL8A_00026200	conserved Plasmodium membrane protein, unknownfunction	2	7251	18.349	PRELSG_1027500	PF3D7_0505000		6		Pfam:PF14500.1(MMS19_N)
PGAL8A_00026300	trafficking protein particle complex subunit 8,putative	2	6903	36.27	PRELSG_1027400	PF3D7_0505100		0		Pfam:PF12739.2(TRAPPC-Trs85)
PGAL8A_00026400	actin-like protein, putative	1	1818	12.401	PRELSG_1027300	PF3D7_0505200		0		Pfam:PF00022.14(Actin)
PGAL8A_00026500	UDP-N-acetylglucosamine transporter, putative	1	1587	4.521	PRELSG_1027200	PF3D7_0505300		8		Pfam:PF04142.10(Nuc_sug_transp)
PGAL8A_00026600	conserved Plasmodium protein, unknown function	1	2082	98.78	PRELSG_1027100	PF3D7_0505400		0
PGAL8A_00026700	DNA mismatch repair protein MSH6, putative	1	3693	104.803	PRELSG_1027000	PF3D7_0505500		0		Pfam:PF00488.16(MutS_V),Pfam:PF01624.15(MutS_I),Pfam:PF05188.12(MutS_II),Pfam:PF05190.13(MutS_IV),Pfam:PF05192.13(MutS_III)
PGAL8A_00026800	conserved Plasmodium protein, unknown function	1	810	26.076	PRELSG_1026900	PF3D7_0505600		0		Pfam:PF07572.7(BCNT)
PGAL8A_00026900	small ubiquitin-related modifier, putative	2	303	88.738	PRELSG_1026700	PF3D7_0505800		0		Pfam:PF11976.3(Rad60-SLD)
PGAL8A_00027000	conserved Plasmodium protein, unknown function	6	381	23.282	PRELSG_1026600	PF3D7_0505900		0		Pfam:PF01920.15(Prefoldin_2)
PGAL8A_00027100	conserved Plasmodium protein, unknown function	2	598	15.878	PRELSG_1026500	PF3D7_0506000		2
PGAL8A_00027200	60S ribosomal subunit protein L24-2, putative	3	606	31.92	PRELSG_1026400	PF3D7_0506100		0		Pfam:PF01246.15(Ribosomal_L24e)
PGAL8A_00027300	TATA-box-binding protein, putative	1	741	21.179	PRELSG_1026300	PF3D7_0506200		0		Pfam:PF00352.16(TBP)
PGAL8A_00027400	conserved Plasmodium protein, unknown function	1	954	15.082	PRELSG_1026200	PF3D7_0506300		0
PGAL8A_00027500	conserved Plasmodium protein, unknown function	5	342	15.71	PRELSG_1026100	PF3D7_0506400		0	24
PGAL8A_00027600	conserved Plasmodium protein, unknown function	3	10479	88.174	PRELSG_1026000	PF3D7_0506500		0
PGAL8A_00027700	histone deacetylase, putative	2	1329	18.513	PRELSG_1025900	PF3D7_0506600		0	203	Pfam:PF00850.14(Hist_deacetyl)
PGAL8A_00027800	GTPase-activating protein, putative	1	1638	9.365	PRELSG_1025800	PF3D7_0506700		4		Pfam:PF00566.13(RabGAP-TBC)
PGAL8A_00027900	transcription factor 25, putative	3	2205	22.665	PRELSG_1025700	PF3D7_0506800		0
PGAL8A_00028000	rhomboid protease ROM4, putative	1	1692	19.634	PRELSG_1025600	PF3D7_0506900		7		Pfam:PF01694.17(Rhomboid)
PGAL8A_00028100	conserved Plasmodium protein, unknown function	3	318	9.796	PRELSG_1025500	PF3D7_0507000		0
PGAL8A_00028200	60S ribosomal protein L4, putative	1	1260	4682.87	PRELSG_1025400	PF3D7_0507100		0		Pfam:PF00573.17(Ribosomal_L4),Pfam:PF14374.1(Ribos_L4_asso_C)
PGAL8A_00028300	subtilisin-like protease 3, putative	1	1644	17.077	PRELSG_1025300	PF3D7_0507200	6.9191	1		Pfam:PF00082.17(Peptidase_S8)
PGAL8A_00028400	conserved Plasmodium protein, unknown function	1	2805	0.681	PRELSG_1025200	PF3D7_0507300	6.64174	1
PGAL8A_00028500	conserved Plasmodium protein, unknown function	1	468	6.555	PRELSG_1025100	PF3D7_0507400		1
PGAL8A_00028600	subtilisin-like protease 1, putative	1	1818	24.664	PRELSG_1025000	PF3D7_0507500	6.7702	1		Pfam:PF00082.17(Peptidase_S8)
PGAL8A_00028700	cell differentiation protein, putative	1	1626	51.171	PRELSG_1024900	PF3D7_0507600		0		Pfam:PF04078.8(Rcd1)
PGAL8A_00028800	nuclear protein localization protein 4, putative	1	1473	81.046	PRELSG_1024800	PF3D7_0507700		0		Pfam:PF05020.10(zf-NPL4),Pfam:PF05021.10(NPL4),Pfam:PF11543.3(UN_NPL4)
PGAL8A_00028900	conserved Plasmodium protein, unknown function	1	4128	55.08	PRELSG_1024700	PF3D7_0507800		0
PGAL8A_00029000	conserved Plasmodium protein, unknown function	3	351	30.771	PRELSG_1024600	PF3D7_0507900		0
PGAL8A_00029100	6-cysteine protein, putative, pseudogene	6	855	2.779	PRELSG_1024500	PF3D7_0508000		2
PGAL8A_00029200	SET domain protein, putative	1	4839	32.625	PRELSG_1024400	PF3D7_0508100		0		Pfam:PF00023.25(Ank),Pfam:PF12796.2(Ank_2)
PGAL8A_00029300	longevity-assurance (LAG1) protein, putative	4	1059	30.768	PRELSG_1024300	PF3D7_0508200	0.978619	6		Pfam:PF03798.11(TRAM_LAG1_CLN8)
PGAL8A_00029400	triose phosphate transporter, putative	1	1035	74.606	PRELSG_1024200	PF3D7_0508300		8		Pfam:PF00892.15(EamA),Pfam:PF03151.11(TPT)
PGAL8A_00029500	transcription factor IIb, putative	4	1272	50.724	PRELSG_1024100	PF3D7_0508400		1		Pfam:PF05018.8(DUF667)
PGAL8A_00029600	guanidine nucleotide exchange factor, putative	1	6786	4.791	PRELSG_1024000	PF3D7_0508500		0		Pfam:PF00415.13(RCC1)
PGAL8A_00029700	conserved Plasmodium protein, unknown function	1	822	48.443	PRELSG_1023900	PF3D7_0508600		0
PGAL8A_00029800	pre-mRNA-processing ATP-dependent RNA helicasePRP5, putative	1	4305	44.555	PRELSG_1023800	PF3D7_0508700		0		Pfam:PF00270.24(DEAD),Pfam:PF00271.26(Helicase_C)
PGAL8A_00029900	single-stranded DNA-binding protein, putative	1	834	61.234	PRELSG_1023700	PF3D7_0508800		0	21	Pfam:PF00436.20(SSB)
PGAL8A_00030000	conserved Plasmodium protein, unknown function	1	8178	176.147	PRELSG_1023600	PF3D7_0508900		0
PGAL8A_00030100	SNAP protein (soluble N-ethylmaleimide-sensitivefactor attachment protein), putative	5	897	66.387	PRELSG_1023500	PF3D7_0509000		0		Pfam:PF14938.1(SNAP)
PGAL8A_00030200	structural maintenance of chromosomes protein 4,putative	1	4428	102.395	PRELSG_1023400	PF3D7_0509100		0		Pfam:PF02463.14(SMC_N),Pfam:PF06470.8(SMC_hinge)
PGAL8A_00030300	leucine-rich repeat protein	5	1041	13.98	PRELSG_1023300	PF3D7_0509200		0		Pfam:PF12799.2(LRR_4),Pfam:PF13855.1(LRR_8)
PGAL8A_00030400	conserved Plasmodium protein, unknown function	2	450	117.455	PRELSG_1023200	PF3D7_0509300		0
PGAL8A_00030500	RNA polymerase I, putative	3	8016	92.887	PRELSG_1023100	PF3D7_0509400		0		Pfam:PF00623.15(RNA_pol_Rpb1_2),Pfam:PF04983.13(RNA_pol_Rpb1_3),Pfam:PF04997.7(RNA_pol_Rpb1_1),Pfam:PF04998.12(RNA_pol_Rpb1_5),Pfam:PF05000.12(RNA_pol_Rpb1_4)
PGAL8A_00030600	conserved Plasmodium protein, unknown function	1	993	35.007	PRELSG_1023000	PF3D7_0509500		0
PGAL8A_00030700	asparagine--tRNA ligase, putative	2	1923	27.985	PRELSG_1022900	PF3D7_0509600		1	25	Pfam:PF00152.15(tRNA-synt_2),Pfam:PF01336.20(tRNA_anti-codon)
PGAL8A_00030800	conserved Plasmodium protein, unknown function	8	984	29.323	PRELSG_1022800	PF3D7_0509700		0
PGAL8A_00030900	phosphatidylinositol 4-kinase, putative	4	4449	80.118	PRELSG_1022700	PF3D7_0509800		0		Pfam:PF00454.22(PI3_PI4_kinase)
PGAL8A_00031000	conserved Plasmodium protein, unknown function	1	927	17.702	PRELSG_1022600	PF3D7_0509900		0		Pfam:PF08743.5(Nse4_C)
PGAL8A_00031100	conserved Plasmodium protein, unknown function	7	2559	21.463	PRELSG_1022500	PF3D7_0510000		0
PGAL8A_00031200	conserved Plasmodium protein, unknown function	1	7335	112.405	PRELSG_1022300	PF3D7_0510100		0
PGAL8A_00031300	peptidyl-prolyl cis-trans isomerase, putative	1	2214	76.607	PRELSG_1022200	PF3D7_0510200		0		Pfam:PF00160.16(Pro_isomerase),Pfam:PF00400.27(WD40)
PGAL8A_00031400	stripes inner membrane complex protein, putative	3	735	35.94	PRELSG_1022100	PF3D7_0510300		0
PGAL8A_00031500	purine nucleoside phosphorylase, putative	1	738	616.217	PRELSG_1022000			0		Pfam:PF01048.15(PNP_UDP_1)
PGAL8A_00031600	conserved Plasmodium protein, unknown function	1	1302	14.349	PRELSG_1021900	PF3D7_0510400		0		Pfam:PF04194.8(PDCD2_C)
PGAL8A_00031700	topoisomerase I, putative	1	2595	281.713	PRELSG_1021800	PF3D7_0510500		0		Pfam:PF01028.15(Topoisom_I),Pfam:PF02919.10(Topoisom_I_N),Pfam:PF14370.1(Topo_C_assoc)
PGAL8A_00031900	conserved Plasmodium protein, unknown function	1	1050	5.507	PRELSG_1021600	PF3D7_0510700		0
PGAL8A_00032000	WD repeat-containing protein, putative	12	1917	7.3	PRELSG_1021500	PF3D7_0510800		0		Pfam:PF00400.27(WD40)
PGAL8A_00032200	histamine-releasing factor, putative	1	516	708.759	PRELSG_1021300	PF3D7_0511000		0		Pfam:PF00838.12(TCTP)
PGAL8A_00032300	conserved Plasmodium protein, unknown function	2	360	15.826	PRELSG_1021200	PF3D7_0511100		0	21
PGAL8A_00032400	stearoyl-CoA desaturase, putative	2	2847	92.065	PRELSG_1021100	PF3D7_0511200		14		Pfam:PF00487.19(FA_desaturase)
PGAL8A_00032500	MORN repeat protein, putative	2	3765	57.481	PRELSG_1021000	PF3D7_0511300		0		Pfam:PF02493.15(MORN),Pfam:PF09794.4(Avl9)
PGAL8A_00032600	hypothetical protein	1	1809	1.6	PRELSG_1020900			0	19
PGAL8A_00032700	conserved Plasmodium protein, unknown function	1	1353	2.238	PRELSG_1020800	PF3D7_0511400		1
PGAL8A_00032800	RNA pseudouridylate synthase, putative	2	27360	122.124	PRELSG_1020700	PF3D7_0511500		0		Pfam:PF00849.17(PseudoU_synth_2)
PGAL8A_00032900	apical rhoptry neck protein, putative	1	486	9.906	PRELSG_1020600	PF3D7_0511600		1	20
PGAL8A_00033000	EKC/KEOPS complex subunit CGI121, putative	4	537	19.044	PRELSG_1020500	PF3D7_0511700		0		Pfam:PF08617.5(CGI-121)
PGAL8A_00033100	inositol-3-phosphate synthase, putative	2	1803	1.636	PRELSG_1020400	PF3D7_0511800		0		Pfam:PF01658.12(Inos-1-P_synth),Pfam:PF07994.7(NAD_binding_5)
PGAL8A_00033200	conserved Plasmodium protein, unknown function	1	1914	3.962	PRELSG_1020300	PF3D7_0511900		3
PGAL8A_00033300	prefoldin subunit, putative	5	360	62.473	PRELSG_1020200	PF3D7_0512000		0		Pfam:PF01920.15(Prefoldin_2)
PGAL8A_00033400	conserved Plasmodium protein, unknown function	2	378	28.303	PRELSG_1020100	PF3D7_0512100		0
PGAL8A_00033500	glutathione synthetase, putative	1	1800	13.176	PRELSG_1020000	PF3D7_0512200		0		Pfam:PF03199.10(GSH_synthase),Pfam:PF03917.12(GSH_synth_ATP)
PGAL8A_00033600	CDK-activating kinase assembly factor, putative	1	783	61.194	PRELSG_1019900	PF3D7_0512300		0		Pfam:PF00097.20(zf-C3HC4),Pfam:PF06391.8(MAT1)
PGAL8A_00033700	conserved Plasmodium protein, unknown function	1	693	1.283	PRELSG_1019800	PF3D7_0512400		0
PGAL8A_00033800	conserved Plasmodium protein, unknown function	9	1824	14.888	PRELSG_1019700	PF3D7_0512450		0
PGAL8A_00033900	conserved Plasmodium protein, unknown function	4	2262	33.285	PRELSG_1019600	PF3D7_0512500		0
PGAL8A_00033950	hypothetical protein	13	1101		PRELSG_1019550			0
PGAL8A_00034000	ras-related protein Rab-1B, putative	6	603	135.987	PRELSG_1019500	PF3D7_0512600		0		Pfam:PF00071.17(Ras)
PGAL8A_00034100	orotate phosphoribosyltransferase, putative	1	723	57.22	PRELSG_1019400	PF3D7_0512700		2		Pfam:PF00156.22(Pribosyltran)
PGAL8A_00034200	conserved Plasmodium protein, unknown function	1	3783	3.342	PRELSG_1019300	PF3D7_0512800		5
PGAL8A_00034300	conserved Plasmodium protein, unknown function	1	846	1.544	PRELSG_1019200	PF3D7_0512900		0		Pfam:PF10469.4(AKAP7_NLS)
PGAL8A_00034400	conserved Plasmodium protein, unknown function	1	807	9.758	PRELSG_1019100	PF3D7_0513000		0	19
PGAL8A_00034500	conserved Plasmodium protein, unknown function	3	753	21.155	PRELSG_1019000	PF3D7_0513100		0
PGAL8A_00034600	conserved Plasmodium protein, unknown function	4	6765	39.238	PRELSG_1018900	PF3D7_0513200		0		Pfam:PF03178.10(CPSF_A)
PGAL8A_00034700	purine nucleoside phosphorylase, putative	1	738	39.844	PRELSG_1018800	PF3D7_0513300		0		Pfam:PF01048.15(PNP_UDP_1)
PGAL8A_00034800	GTP-binding protein, putative	6	855	8.296	PRELSG_1018700	PF3D7_0513400		0		Pfam:PF01926.18(MMR_HSR1)
PGAL8A_00034900	mitochondrial import inner membrane translocasesubunit TIM16, putative	2	375	11.537	PRELSG_1018600	PF3D7_0513500		0	24
PGAL8A_00035000	deoxyribodipyrimidine photo-lyase, putative	2	2331	51.14	PRELSG_1018500	PF3D7_0513600		0		Pfam:PF00875.13(DNA_photolyase),Pfam:PF03441.9(FAD_binding_7)
PGAL8A_00035100	secreted ookinete protein, putative	2	1047	4.328	PRELSG_1018400			0	24
PGAL8A_00035200	secreted ookinete protein, putative	2	2151	20.246	PRELSG_1018300	PF3D7_0513700		1	24
PGAL8A_00035300	ras-related protein Rab-1A, putative	1	621	67.859	PRELSG_1018200	PF3D7_0513800		0		Pfam:PF00071.17(Ras)
PGAL8A_00035400	conserved Plasmodium protein, unknown function	2	717	11.41	PRELSG_1018100	PF3D7_0513900		0
PGAL8A_00035500	tubulin--tyrosine ligase, putative	5	1266	37.387	PRELSG_1018000	PF3D7_0514000		0		Pfam:PF03133.10(TTL)
PGAL8A_00035600	ATP-dependent DNA helicase UvrD, putative	1	3384	30.91	PRELSG_1017900	PF3D7_0514100		1		Pfam:PF00580.16(UvrD-helicase),Pfam:PF13361.1(UvrD_C)
PGAL8A_00035700	conserved Plasmodium protein, unknown function	1	1695	11.742	PRELSG_1017800	PF3D7_0514200		0
PGAL8A_00035800	aspartate--tRNA ligase, putative	1	2976	24.881	PRELSG_1017700	PF3D7_0514300		0		Pfam:PF00152.15(tRNA-synt_2)
PGAL8A_00036000	fam-f protein	3	1746	0.568	PRELSG_1017500			0	24
PGAL8A_00036100	conserved Plasmodium membrane protein, unknownfunction	5	462	16.584	PRELSG_1017400	PF3D7_0514500		3
PGAL8A_00036200	conserved Plasmodium protein, unknown function	1	4308	16.273	PRELSG_1017200	PF3D7_0514700		2		Pfam:PF02493.15(MORN)
PGAL8A_00036300	kinase, putative	1	3552	15.044	PRELSG_1017100	PF3D7_0514800		0		Pfam:PF03770.11(IPK)
PGAL8A_00036400	conserved Plasmodium protein, unknown function	1	960	28.139	PRELSG_1017000	PF3D7_0514900		0
PGAL8A_00036500	pre-mRNA-splicing factor CWC2, putative	1	2526	205.104	PRELSG_1016900	PF3D7_0515000		0		Pfam:PF13893.1(RRM_5)
PGAL8A_00036600	rhomboid protease ROM9, putative	3	1191	2.979	PRELSG_1016800	PF3D7_0515100		6		Pfam:PF01694.17(Rhomboid)
PGAL8A_00036700	conserved Plasmodium protein, unknown function	2	408	6.228	PRELSG_1016700	PF3D7_0515200		1
PGAL8A_00036800	phosphatidylinositol 3-kinase, putative	1	5901	30.821	PRELSG_1016600	PF3D7_0515300		0		Pfam:PF00454.22(PI3_PI4_kinase),Pfam:PF00613.15(PI3Ka)
PGAL8A_00036900	conserved Plasmodium protein, unknown function	6	1929	161.95	PRELSG_1016500	PF3D7_0515400		0
PGAL8A_00037000	amino acid transporter, putative	4	2700	1.465	PRELSG_1016400	PF3D7_0515500		15
PGAL8A_00037100	conserved Plasmodium protein, unknown function	10	4077	27.771	PRELSG_1016300	PF3D7_0515600		0
PGAL8A_00037200	glideosome-associated protein 40, putative	1	1389	660.261	PRELSG_1016200	PF3D7_0515700		10
PGAL8A_00037300	BolA-like protein, putative	1	267	22.215	PRELSG_1016100	PF3D7_0515800		0		Pfam:PF01722.13(BolA)
PGAL8A_00037400	NLI interacting factor-like phosphatase,putative	1	981	41.545	PRELSG_1016000	PF3D7_0515900		0		Pfam:PF03031.13(NIF)
PGAL8A_00037500	RAP protein, putative	2	2979	48.472	PRELSG_1015900	PF3D7_0516000		0		Pfam:PF08373.5(RAP)
PGAL8A_00037600	cation-transporting ATPase 1, putative	2	6231	17.076	PRELSG_1015800	PF3D7_0516100		9		Pfam:PF00122.15(E1-E2_ATPase),Pfam:PF12409.3(P5-ATPase),Pfam:PF12710.2(HAD)
PGAL8A_00037700	40S ribosomal protein S11, putative	3	456	557.466	PRELSG_1015700	PF3D7_0516200		0		Pfam:PF00411.14(Ribosomal_S11)
PGAL8A_00037800	tRNA pseudouridine synthase, putative	1	1566	4.245	PRELSG_1015600	PF3D7_0516300		0		Pfam:PF01416.15(PseudoU_synth_1)
PGAL8A_00037900	phosducin-like protein, putative	1	945	119.554	PRELSG_1015500	PF3D7_0516400		0		Pfam:PF02114.11(Phosducin)
PGAL8A_00038000	major facilitator superfamily domain-containingprotein, putative	6	1329	22.327	PRELSG_1015400	PF3D7_0516500		11		Pfam:PF07690.11(MFS_1)
PGAL8A_00038100	translation initiation factor IF-2, putative	1	4638	61.436	PRELSG_1015300	PF3D7_0516600		1		Pfam:PF00009.22(GTP_EFTU),Pfam:PF11987.3(IF-2)
PGAL8A_00038200	ubiquitin carboxyl-terminal hydrolase 2,putative	3	3540	66.025	PRELSG_1015200	PF3D7_0516700		0		Pfam:PF00443.24(UCH)
PGAL8A_00038300	transcription factor with AP2 domain(s),putative	1	5982	115.663	PRELSG_1015100	PF3D7_0516800		0		Pfam:PF00847.15(AP2),Pfam:PF14733.1(ACDC)
PGAL8A_00038400	60S ribosomal protein L2, putative	2	783	1331.88	PRELSG_1015000	PF3D7_0516900		0		Pfam:PF00181.18(Ribosomal_L2),Pfam:PF03947.13(Ribosomal_L2_C)
PGAL8A_00038500	60S ribosomal protein L12, putative	2	498	234.73	PRELSG_1014900	PF3D7_0517000		0		Pfam:PF00298.14(Ribosomal_L11),Pfam:PF03946.9(Ribosomal_L11_N)
PGAL8A_00038600	conserved Plasmodium protein, unknown function	1	1368	10.333	PRELSG_1014800	PF3D7_0517100		0
PGAL8A_00038700	conserved Plasmodium protein, unknown function	1	2493	2.518	PRELSG_1014700	PF3D7_0517200		0
PGAL8A_00038800	serine/arginine-rich splicing factor 1, putative	3	903	1100.41	PRELSG_1014600	PF3D7_0517300		0		Pfam:PF00076.17(RRM_1)
PGAL8A_00038900	FACT complex subunit SPT16, putative	3	3165	261.201	PRELSG_1014500	PF3D7_0517400		0		Pfam:PF00557.19(Peptidase_M24),Pfam:PF08512.7(Rtt106),Pfam:PF08644.6(SPT16),Pfam:PF14826.1(FACT-Spt16_Nlob)
PGAL8A_00039000	UTP--glucose-1-phosphate uridylyltransferase,putative	1	2169	22.936	PRELSG_1014400	PF3D7_0517500		0		Pfam:PF01704.13(UDPGP)
PGAL8A_00039100	F-actin-capping protein subunit beta, putative	1	906	9.073	PRELSG_1014300	PF3D7_0517600		0		Pfam:PF01115.12(F_actin_cap_B)
PGAL8A_00039200	eukaryotic translation initiation factor 3subunit B, putative	1	2151	146.076	PRELSG_1014200	PF3D7_0517700		0		Pfam:PF00076.17(RRM_1),Pfam:PF08662.6(eIF2A)
PGAL8A_00039300	apicortin, putative	2	786	31.666	PRELSG_1014100	PF3D7_0517800		0		Pfam:PF05517.7(p25-alpha)
PGAL8A_00039400	transcription factor with AP2 domain(s),putative	1	5364	57.401	PRELSG_1014000			0
PGAL8A_00039500	zinc finger protein, putative	2	1650	45.482	PRELSG_1013900	PF3D7_0517900		0		Pfam:PF00643.19(zf-B_box)
PGAL8A_00039600	conserved protein, unknown function	6	813	154.717	PRELSG_1013800	PF3D7_0518000		0		Pfam:PF00097.20(zf-C3HC4)
PGAL8A_00039700	RAP protein, putative	2	3633	31.695	PRELSG_1013700	PF3D7_0518100		2		Pfam:PF08373.5(RAP)
PGAL8A_00039800	SWIB/MDM2 domain-containing protein, putative	1	435	107.327	PRELSG_1013600	PF3D7_0518200		0		Pfam:PF02201.13(SWIB)
PGAL8A_00039900	proteasome subunit beta type-1, putative	4	726	120.456	PRELSG_1013500	PF3D7_0518300		0		Pfam:PF00227.21(Proteasome)
PGAL8A_00040000	cyclin, putative	1	672	28.118	PRELSG_1013400	PF3D7_0518400		0		Pfam:PF08613.6(Cyclin)
PGAL8A_00040100	ATP-dependent RNA helicase DDX23, putative	1	2721	124.982	PRELSG_1013300	PF3D7_0518500		0		Pfam:PF00270.24(DEAD),Pfam:PF00271.26(Helicase_C)
PGAL8A_00040200	surface-associated interspersed protein (SURFIN)	1	2495	0.451				0
PGAL8A_00040300	fam-g protein	2	861	30.735			0.891504	0
PGAL8A_00040400	elongation factor 1-alpha, putative, fragment	1	546	2452.74				0		Pfam:PF03143.12(GTP_EFTU_D3),Pfam:PF03144.20(GTP_EFTU_D2)
PGAL8A_00040500	surface-associated interspersed protein (SURFIN)	2	2625	0.719				1
PGAL8A_00040600	surface-associated interspersed protein (SURFIN)	1	1486	1.821				0
PGAL8A_00040700	surface-associated interspersed protein (SURFIN)	2	4209	0.727				1
PGAL8A_00040750	surface-associated interspersed protein (SURFIN)	1	495	3.623				0
PGAL8A_00040800	surface-associated interspersed protein (SURFIN),pseudogene	2	5301	0.559				0
PGAL8A_00040900	fam-g protein	2	831	4.837			8.37311	0	23	Pfam:PF09688.5(Wx5_PLAF3D7)
PGAL8A_00041000	fam-g protein	2	429	2.824			3.9109	1	23
PGAL8A_00041100	Plasmodium exported protein, unknown function	5	2073	11.718				0
PGAL8A_00041200	fam-g protein, pseudogene	2	411	2.68			2.441	0
PGAL8A_00041300	fam-g protein	2	549	10.302			8.54487	1
PGAL8A_00041400	fam-g protein	2	810	5.604			7.95372	0	29
PGAL8A_00041500	fam-g protein	2	417	2.358			2.0404	1
PGAL8A_00041600	fam-g protein	2	306	2.442			3.943	1
PGAL8A_00041700	fam-g protein	2	534	4.198			8.07262	0
PGAL8A_00041800	fam-g protein	2	534	2.946			7.85213	0
PGAL8A_00041900	fam-g protein	2	537	3.311			9.16473	0
PGAL8A_00042000	fam-g protein	2	582	14.206			7.48895	0
PGAL8A_00042100	surface-associated interspersed protein (SURFIN)	2	4656	0.078				1
PGAL8A_00042200	fam-e protein	2	1011	29.42				1
PGAL8A_00042300	fam-e protein	2	1011	21.246				1
PGAL8A_00042400	surface-associated interspersed protein (SURFIN),fragment	1	234	0.437				0
PGAL8A_00042500	Plasmodium exported protein, unknown function	2	603	36.384	PRELSG_0002500		5.0407	1
PGAL8A_00042600	hypothetical protein	5	2322	0.01	PRELSG_0002600			0
PGAL8A_00042700	Plasmodium exported protein, unknown function	2	912	0.224			1.4061	0
PGAL8A_00043000	centrin, putative	4	318	29.289	PRELSG_0100400	PF3D7_0702900		0	24	Pfam:PF13499.1(EF-hand_7)
PGAL8A_00043100	conserved Plasmodium protein, unknown function	1	4962	30.779	PRELSG_0100500	PF3D7_0703000		3
PGAL8A_00043200	conserved Plasmodium protein, unknown function	1	534	26.781	PRELSG_0100600	PF3D7_0703100		0		Pfam:PF01883.14(DUF59)
PGAL8A_00043300	conserved Plasmodium protein, unknown function	1	3933	51.333	PRELSG_0100700	PF3D7_0703200		0
PGAL8A_00043400	conserved Plasmodium protein, unknown function	1	420	11.144	PRELSG_0100800	PF3D7_0703300		0
PGAL8A_00043500	conserved Plasmodium protein, unknown function	1	2067	12.734	PRELSG_0100900	PF3D7_0703400		3
PGAL8A_00043600	erythrocyte membrane-associated antigen,putative	1	6195	108.129	PRELSG_0101000	PF3D7_0703500		0		Pfam:PF13086.1(AAA_11),Pfam:PF13087.1(AAA_12)
PGAL8A_00043700	conserved Plasmodium protein, unknown function	10	786	139.104	PRELSG_0101100	PF3D7_0703600		0
PGAL8A_00043800	conserved Plasmodium protein, unknown function	1	609	92.796	PRELSG_0101200	PF3D7_0703700		0
PGAL8A_00043900	conserved Plasmodium protein, unknown function	1	2643	14.885	PRELSG_0101300	PF3D7_0703800		0
PGAL8A_00044000	conserved Plasmodium protein, unknown function	1	11358	20.89	PRELSG_0101400	PF3D7_0703900		6
PGAL8A_00044100	conserved Plasmodium protein, unknown function	1	8685	23.342	PRELSG_0101500	PF3D7_0704000		4
PGAL8A_00044200	conserved Plasmodium protein, unknown function	1	10095	84.315	PRELSG_0101600	PF3D7_0704100		7
PGAL8A_00044300	tRNA m5C-methyltransferase, putative	1	3144	19.336	PRELSG_0101700	PF3D7_0704200		0		Pfam:PF01189.12(Nol1_Nop2_Fmu)
PGAL8A_00044400	conserved Plasmodium membrane protein, unknownfunction	1	6858	134.527	PRELSG_0101800	PF3D7_0704300		4
PGAL8A_00044500	phosphoinositide-binding protein, putative	1	2448	50.46	PRELSG_0102300	PF3D7_0704400		0		Pfam:PF00400.27(WD40),Pfam:PF00787.19(PX)
PGAL8A_00044600	serine/threonine protein kinase, putative	1	3549	54.44	PRELSG_0102400	PF3D7_0704500		0		Pfam:PF00069.20(Pkinase)
PGAL8A_00044700	ubiquitin transferase, putative	8	10077	182.146	PRELSG_0102500	PF3D7_0704600		4		Pfam:PF00632.20(HECT)
PGAL8A_00044800	phosphopantetheine adenylyltransferase, putative	1	3837	29.237	PRELSG_0102600	PF3D7_0704700		0
PGAL8A_00044900	conserved Plasmodium protein, unknown function	1	4026	83.182	PRELSG_0102700	PF3D7_0704800		0
PGAL8A_00045000	peptide chain release factor 2, putative	1	1029	15.771	PRELSG_0102800	PF3D7_0704900		0		Pfam:PF00472.15(RF-1),Pfam:PF03462.13(PCRF)
PGAL8A_00045100	methyltransferase, putative	2	3090	41.601	PRELSG_0102900	PF3D7_0705000		0		Pfam:PF03291.11(Pox_MCEL)
PGAL8A_00045200	conserved Plasmodium protein, unknown function	1	2271	38.394	PRELSG_0103000	PF3D7_0705100		0
PGAL8A_00045300	conserved Plasmodium protein, unknown function	1	3711	4.721	PRELSG_0103100	PF3D7_0705200		0
PGAL8A_00045400	origin recognition complex subunit 2, putative	1	2319	128.031	PRELSG_0103200	PF3D7_0705300		0		Pfam:PF04084.9(ORC2)
PGAL8A_00045500	DNA replication licensing factor MCM7, putative	1	2469	211.655	PRELSG_0103300	PF3D7_0705400		0		Pfam:PF00493.18(MCM),Pfam:PF14551.1(MCM_N)
PGAL8A_00045600	inositol-phosphate phosphatase, putative	2	7200	139.803	PRELSG_0103400	PF3D7_0705500		0		Pfam:PF02383.13(Syja_N)
PGAL8A_00045700	RNA helicase, putative	1	3078	15.996	PRELSG_0103500	PF3D7_0705600		0		Pfam:PF00270.24(DEAD),Pfam:PF00271.26(Helicase_C)
PGAL8A_00045800	40S ribosomal protein S29, putative	3	165	95.494	PRELSG_0103600	PF3D7_0705700		0		Pfam:PF00253.16(Ribosomal_S14)
PGAL8A_00045900	cysteine-rich secretory protein, putative	8	591	14.668	PRELSG_0103700	PF3D7_0705800		1	24	Pfam:PF00188.21(CAP)
PGAL8A_00046000	ATP synthase subunit C, putative	3	264	117.669	PRELSG_0103800	PF3D7_0705900		2
PGAL8A_00046100	importin-7, putative	1	3561	108.516	PRELSG_0103900	PF3D7_0706000		0		Pfam:PF03810.14(IBN_N)
PGAL8A_00046200	conserved Plasmodium protein, unknown function	9	4596	17.422	PRELSG_0104000	PF3D7_0706100		3
PGAL8A_00046300	conserved Plasmodium protein, unknown function	3	249	11.247	PRELSG_0104100	PF3D7_0706200		0
PGAL8A_00046400	conserved Plasmodium protein, unknown function	2	330	17.902	PRELSG_0104200			0
PGAL8A_00046500	60S ribosomal protein L37, putative	1	279	437.928	PRELSG_0104300	PF3D7_0706400		0		Pfam:PF01907.14(Ribosomal_L37e)
PGAL8A_00046600	conserved Plasmodium protein, unknown function	1	4755	130.041	PRELSG_0104400	PF3D7_0706500		0
PGAL8A_00046700	conserved Plasmodium protein, unknown function	1	1728	2.026	PRELSG_0104500	PF3D7_0706600		2
PGAL8A_00046800	DNA mismatch repair protein MSH2, putative	1	2430	17.128				0		Pfam:PF00488.16(MutS_V),Pfam:PF05192.13(MutS_III)
PGAL8A_00047300	conserved Plasmodium protein, unknown function	1	5112	35.884	PRELSG_0105100	PF3D7_0707200		2
PGAL8A_00047400	rhoptry-associated membrane antigen, putative	6	2139	320.855	PRELSG_0105200	PF3D7_0707300		0	17
PGAL8A_00047500	AAA family ATPase, putative	1	1863	46.827	PRELSG_0105300	PF3D7_0707400		0		Pfam:PF00004.24(AAA),Pfam:PF12037.3(DUF3523)
PGAL8A_00047600	conserved Plasmodium protein, unknown function	1	3870	7.395	PRELSG_0105400	PF3D7_0707500		0
PGAL8A_00047700	conserved Plasmodium protein, unknown function	1	705	61.626	PRELSG_0105500	PF3D7_0707600		0
PGAL8A_00047800	E3 ubiquitin-protein ligase, putative	1	2166	119.918	PRELSG_0105600	PF3D7_0707700		0		Pfam:PF04564.10(U-box),Pfam:PF13414.1(TPR_11)
PGAL8A_00047900	RAP protein, putative	3	3360	16.04	PRELSG_0105700	PF3D7_0707800		1		Pfam:PF08373.5(RAP)
PGAL8A_00048000	ribosomal protein S8e, putative	1	780	51.475	PRELSG_0105800	PF3D7_0707900		0		Pfam:PF01201.17(Ribosomal_S8e)
PGAL8A_00048100	cytoskeleton associated protein, putative	3	2397	13.022	PRELSG_0105900	PF3D7_0708000		0		Pfam:PF01302.20(CAP_GLY)
PGAL8A_00048200	conserved Plasmodium protein, unknown function	1	312	22.087	PRELSG_0106000			0
PGAL8A_00048300	DNA-directed RNA polymerases I, II, and IIIsubunit RPABC5, putative	1	210	29.443	PRELSG_0106100	PF3D7_0708100		0		Pfam:PF01194.12(RNA_pol_N)
PGAL8A_00048400	conserved Plasmodium protein, unknown function	2	2568	27.974	PRELSG_0106200	PF3D7_0708200		1
PGAL8A_00048500	EKC/KEOPS complex subunit BUD32, putative	5	702	45.563	PRELSG_0106300	PF3D7_0708300		0		Pfam:PF00069.20(Pkinase)
PGAL8A_00048600	heat shock protein 90, putative	2	2196	11476	PRELSG_0106400	PF3D7_0708400		0		Pfam:PF00183.13(HSP90),Pfam:PF02518.21(HATPase_c)
PGAL8A_00048700	heat shock protein 86 family protein, putative	1	2526	59.537	PRELSG_0106600	PF3D7_0708500		0		Pfam:PF06047.6(SynMuv_product)
PGAL8A_00048800	inner membrane complex protein 1d, putative	2	768	24.818	PRELSG_0106700	PF3D7_0708600		0
PGAL8A_00048900	RNA helicase, putative	1	678	266.578	PRELSG_0106800	PF3D7_0708700		1
PGAL8A_00049000	heat shock protein 110, putative	1	2598	763.401	PRELSG_0106900	PF3D7_0708800		0		Pfam:PF00012.15(HSP70)
PGAL8A_00049100	Cg3 protein, putative	1	879	34.097	PRELSG_0107000	PF3D7_0708900		1		Pfam:PF02630.9(SCO1-SenC)
PGAL8A_00049200	chloroquine resistance transporter, putative	14	1275	45.723	PRELSG_0107100	PF3D7_0709000		9
PGAL8A_00049300	cg1 protein, putative	1	2841	74.038	PRELSG_0107200	PF3D7_0709100		0	17	Pfam:PF08755.6(YccV-like)
PGAL8A_00049400	glutaredoxin-like protein, putative	1	888	80.862	PRELSG_0107300	PF3D7_0709200		0		Pfam:PF00462.19(Glutaredoxin)
PGAL8A_00049500	Cg2 protein, putative	1	7554	60.106	PRELSG_0107400	PF3D7_0709300		2
PGAL8A_00049600	Cg7 protein, putative	2	3015	50.841	PRELSG_0107500	PF3D7_0709400		0
PGAL8A_00049700	conserved Plasmodium protein, unknown function	2	402	30.174	PRELSG_0107600	PF3D7_0709500		0
PGAL8A_00049800	ribonucleases P/MRP protein subunit POP1,putative	5	3549	24.269	PRELSG_0107700	PF3D7_0709600		0		Pfam:PF06978.6(POP1),Pfam:PF08170.7(POPLD)
PGAL8A_00049900	lysophospholipase, putative	1	1080	321.265	PRELSG_0107800	PF3D7_0709700		0		Pfam:PF12697.2(Abhydrolase_6)
PGAL8A_00050000	conserved protein, unknown function	1	195	29.65	PRELSG_0107900	PF3D7_0709800		1		Pfam:PF14990.1(DUF4516)
PGAL8A_00050100	conserved Plasmodium protein, unknown function	3	6078	49.739	PRELSG_0108000	PF3D7_0709900		4		Pfam:PF05990.7(DUF900)
PGAL8A_00050200	conserved Plasmodium protein, unknown function	7	8922	34.387	PRELSG_0108100	PF3D7_0710000		0
PGAL8A_00050300	conserved Plasmodium protein, unknown function	1	1311	27.71	PRELSG_0108200	PF3D7_0710100		1
PGAL8A_00050400	conserved Plasmodium protein, unknown function	1	5373	55.046	PRELSG_0108300	PF3D7_0710200		0
PGAL8A_00050500	DNA repair protein RAD14, putative	1	1053	17.115	PRELSG_0108400	PF3D7_0710400		0
PGAL8A_00050600	conserved Plasmodium protein, unknown function	5	750	9.859	PRELSG_0108500	PF3D7_0710500		0
PGAL8A_00050700	60S ribosomal protein L34, putative	2	441	133.98	PRELSG_0108600	PF3D7_0710600		0		Pfam:PF01199.13(Ribosomal_L34e)
PGAL8A_00050800	conserved Plasmodium protein, unknown function	1	630	29.705	PRELSG_0108700	PF3D7_0710700		0
PGAL8A_00050900	conserved Plasmodium protein, unknown function	1	1167	34.385	PRELSG_0108800	PF3D7_0710800		1
PGAL8A_00051000	50S ribosomal protein L1, mitochondrial,putative	1	1059	39.095	PRELSG_0108900	PF3D7_0710900		0
PGAL8A_00051100	AAA family ATPase, CDC48 subfamily, putative	1	3432	64.518				1		Pfam:PF00004.24(AAA),Pfam:PF02359.13(CDC48_N)
PGAL8A_00051200	conserved Plasmodium protein, unknown function	1	456	6.193	PRELSG_0109100	PF3D7_0711100		4
PGAL8A_00051300	conserved Plasmodium protein, unknown function	1	2562	23.259	PRELSG_0109200	PF3D7_0711200		0
PGAL8A_00051400	conserved Plasmodium protein, unknown function	1	342	23.875	PRELSG_0109300	PF3D7_0711300		0
PGAL8A_00051500	histone deacetylase complex subunit SAP18,putative	1	2082	58.749	PRELSG_0109400	PF3D7_0711400		0		Pfam:PF06487.7(SAP18)
PGAL8A_00051600	regulator of chromosome condensation, putative	1	2322	242.637	PRELSG_0109500	PF3D7_0711500		0		Pfam:PF00415.13(RCC1)
PGAL8A_00051650	protein MPODD, putative	2	273		PRELSG_0109550	PF3D7_0808450
PGAL8A_00051700	coatomer subunit epsilon, putative	2	849	23.664	PRELSG_0109600	PF3D7_0808400		0		Pfam:PF04733.9(Coatomer_E)
PGAL8A_00051800	ubiquitin regulatory protein, putative	2	729	152.808	PRELSG_0109700	PF3D7_0808300		0		Pfam:PF00789.15(UBX),Pfam:PF08059.8(SEP)
PGAL8A_00051900	plasmepsin X, putative	1	1581	25.45	PRELSG_0109800	PF3D7_0808200		0	26	Pfam:PF00026.18(Asp)
PGAL8A_00052000	AP-3 complex subunit delta, putative	3	4008	9.26	PRELSG_0109900	PF3D7_0808100		2		Pfam:PF01602.15(Adaptin_N)
PGAL8A_00052100	conserved Plasmodium protein, unknown function	1	3141	9.442	PRELSG_0110000	PF3D7_0808000		0
PGAL8A_00052200	tyrosine--tRNA ligase, putative	3	1119	35.599	PRELSG_0110100	PF3D7_0807900		0		Pfam:PF00579.20(tRNA-synt_1b)
PGAL8A_00052300	proteasome subunit alpha type 5, putative	2	1281	401.687	PRELSG_0110200	PF3D7_0807800		0
PGAL8A_00052400	serine protease DegP, putative	5	3702	133.783	PRELSG_0110300	PF3D7_0807700	3.68184	0	26	Pfam:PF13365.1(Trypsin_2)
PGAL8A_00052500	conserved Plasmodium protein, unknown function	4	3327	207.462	PRELSG_0110400	PF3D7_0807600		1
PGAL8A_00052600	proteasome subunit alpha type-6, putative	3	783	737.649	PRELSG_0110500	PF3D7_0807500		0		Pfam:PF00227.21(Proteasome),Pfam:PF10584.4(Proteasome_A_N)
PGAL8A_00052700	coenzyme Q-binding protein COQ10 homolog,mitochondrial, putative	5	570	6.569	PRELSG_0110600	PF3D7_0807400		0
PGAL8A_00052800	ras-related protein Rab-18, putative	4	606	25.183	PRELSG_0110700	PF3D7_0807300		0		Pfam:PF00071.17(Ras)
PGAL8A_00052900	conserved Plasmodium membrane protein, unknownfunction	1	816	15.463	PRELSG_0110800	PF3D7_0807200		4
PGAL8A_00053000	adrenodoxin-type ferredoxin, putative	3	279	26.842	PRELSG_1430700	PF3D7_1214600		0		Pfam:PF00111.22(Fer2)
PGAL8A_00053100	PIR-like protein, fragment	1	219	2.874				0
PGAL8A_00053200	fam-i protein	2	729	1.521				0
PGAL8A_00053300	fam-g protein	1	561	102.881				0
PGAL8A_00053400	heat shock protein 70, putative	2	1887	6599.97				0		Pfam:PF00012.15(HSP70)
PGAL8A_00053600	regulator of chromosome condensation, putative	1	1710	48.183	PRELSG_0300200	PF3D7_0403100		0
PGAL8A_00053700	conserved Plasmodium protein, unknown function	1	1185	52.934	PRELSG_0300300	PF3D7_0403200		0		Pfam:PF12542.3(CWC25)
PGAL8A_00053800	conserved Plasmodium protein, unknown function	5	438	7.417	PRELSG_0300400	PF3D7_0403300	3.19426	1	20
PGAL8A_00053900	conserved Plasmodium protein, unknown function	3	10041	19.005	PRELSG_0300500	PF3D7_0403400		4		Pfam:PF04182.7(B-block_TFIIIC)
PGAL8A_00054000	ubiquitin specific protease, putative	1	1146	13.255	PRELSG_0300600	PF3D7_0403500	0.779149	0		Pfam:PF00443.24(UCH)
PGAL8A_00054100	conserved Plasmodium protein, unknown function	1	2856	3.639	PRELSG_0300700			0
PGAL8A_00054200	conserved Plasmodium protein, unknown function	2	1719	72.436	PRELSG_0300800	PF3D7_0403600		0
PGAL8A_00054300	pre-mRNA-splicing factor CLF1, putative	6	2076	147.557	PRELSG_0300900	PF3D7_0403700		0
PGAL8A_00054400	alpha/beta hydrolase, putative	1	2724	87.215	PRELSG_0301000	PF3D7_0403800		0		Pfam:PF12695.2(Abhydrolase_5)
PGAL8A_00054500	SET domain protein, putative	2	3495	27.023	PRELSG_0301100	PF3D7_0403900		0		Pfam:PF00856.23(SET)
PGAL8A_00054600	conserved Plasmodium protein, unknown function	2	246	15.221	PRELSG_0301200	PF3D7_0404000		0
PGAL8A_00054700	transcription factor with AP2 domain(s),putative	2	11664	14.231	PRELSG_0301300	PF3D7_0404100		0		Pfam:PF00847.15(AP2)
PGAL8A_00054800	conserved Plasmodium protein, unknown function	2	483	8.078	PRELSG_0301400	PF3D7_0404200		0
PGAL8A_00054900	conserved Plasmodium protein, unknown function	9	1776	83.333	PRELSG_0301500	PF3D7_0404300		0
PGAL8A_00055000	6-cysteine protein, putative	1	942	1.311	PRELSG_0301600	PF3D7_0404400		1		Pfam:PF07422.8(s48_45)
PGAL8A_00055100	6-cysteine protein, putative	1	1488	0.523	PRELSG_0301700	PF3D7_0404500		2		Pfam:PF07422.8(s48_45)
PGAL8A_00055200	6-cysteine protein, putative	1	1050	0.697	PRELSG_0301800			1	20	Pfam:PF07422.8(s48_45)
PGAL8A_00055300	conserved Plasmodium protein, unknown function	1	10902	37.233	PRELSG_0301900	PF3D7_0404600		0
PGAL8A_00055400	dipeptidyl peptidase 3, putative	2	2529	57.74	PRELSG_0302000	PF3D7_0404700		0	18	Pfam:PF00112.18(Peptidase_C1)
PGAL8A_00055500	conserved Plasmodium protein, unknown function	2	1788	1.535	PRELSG_0302100	PF3D7_0404800	2.5436	0	19
PGAL8A_00055600	6-cysteine protein, putative	1	1077	52.012	PRELSG_0302200	PF3D7_0404900		0	21	Pfam:PF07422.8(s48_45)
PGAL8A_00055700	ATP-dependent RNA helicase DDX51, putative	3	1578	9.656	PRELSG_0302300	PF3D7_0405000		0		Pfam:PF00270.24(DEAD),Pfam:PF00271.26(Helicase_C)
PGAL8A_00055800	protein transport protein Sec24B, putative	5	5880	62.311	PRELSG_0302400	PF3D7_0405100		0		Pfam:PF04811.10(Sec23_trunk),Pfam:PF04815.10(Sec23_helical),Pfam:PF08033.7(Sec23_BS)
PGAL8A_00055900	ag-1 blood stage membrane protein homologue,putative	9	1365	12.684	PRELSG_0302500	PF3D7_0405200		0
PGAL8A_00056000	liver specific protein 2, putative	1	3414	214.696	PRELSG_0302600	PF3D7_0405300		1		Pfam:PF07422.8(s48_45)
PGAL8A_00056100	pre-mRNA-processing-splicing factor 8, putative	2	9513	219.716	PRELSG_0302700	PF3D7_0405400		0		Pfam:PF08082.6(PRO8NT),Pfam:PF08083.6(PROCN),Pfam:PF08084.6(PROCT),Pfam:PF10596.4(U6-snRNA_bdg),Pfam:PF10597.4(U5_2-snRNA_bdg),Pfam:PF10598.4(RRM_4),Pfam:PF12134.3(PRP8_domainIV)
PGAL8A_00056200	conserved Plasmodium protein, unknown function	3	666	13.465	PRELSG_0302800	PF3D7_0405500		0
PGAL8A_00056300	conserved Plasmodium membrane protein, unknownfunction	9	945	34.404	PRELSG_0302900	PF3D7_0405600		4		Pfam:PF03661.8(UPF0121)
PGAL8A_00056400	lysine decarboxylase, putative	1	5973	7.05	PRELSG_0303000	PF3D7_0405700		0		Pfam:PF01276.15(OKR_DC_1),Pfam:PF03711.10(OKR_DC_1_C)
PGAL8A_00056500	conserved Plasmodium protein, unknown function	1	315	43.028	PRELSG_0303100	PF3D7_0405800		0
PGAL8A_00056600	apical sushi protein, putative	4	2028	488.465	PRELSG_0303200	PF3D7_0405900		0	20	Pfam:PF00084.15(Sushi)
PGAL8A_00056700	conserved Plasmodium protein, unknown function	1	1503	63.68	PRELSG_0303300	PF3D7_0406000		0
PGAL8A_00056800	V-type proton ATPase subunit B, putative	2	1485	200.661	PRELSG_0303400	PF3D7_0406100		0		Pfam:PF00006.20(ATP-synt_ab),Pfam:PF00306.22(ATP-synt_ab_C),Pfam:PF02874.18(ATP-synt_ab_N)
PGAL8A_00056900	sexual stage-specific protein precursor,putative	1	432	2781.67	PRELSG_0303500	PF3D7_0406200		2	26
PGAL8A_00057000	cytosolic glyoxalase II, putative	7	792	92.123	PRELSG_0303600	PF3D7_0406400		0		Pfam:PF00753.22(Lactamase_B)
PGAL8A_00057100	conserved Plasmodium protein, unknown function	2	8100	6.91	PRELSG_0303700	PF3D7_0406500		0		Pfam:PF11977.3(RNase_Zc3h12a)
PGAL8A_00057200	conserved Plasmodium protein, unknown function	1	420	30.829	PRELSG_0303800	PF3D7_0406600		0
PGAL8A_00057300	conserved Plasmodium protein, unknown function	13	2523	30.964	PRELSG_0303900	PF3D7_0406700		0
PGAL8A_00057400	ribosomal protein L25, putative	5	816	100.403	PRELSG_0304000	PF3D7_0406800		0
PGAL8A_00057500	conserved Plasmodium protein, unknown function	8	9906	1.457	PRELSG_0304100	PF3D7_0406900		0
PGAL8A_00057600	conserved Plasmodium protein, unknown function	1	1314	14.799	PRELSG_0304200	PF3D7_0407000		0
PGAL8A_00057700	methyltransferase, putative	2	933	28.658	PRELSG_0304300	PF3D7_0407100		1		Pfam:PF08241.7(Methyltransf_11)
PGAL8A_00057800	peptidyl-tRNA hydrolase 2, putative	5	555	35.463	PRELSG_0304400	PF3D7_0407200		1		Pfam:PF01981.11(PTH2)
PGAL8A_00057900	transcription factor, putative	1	723	4.319	PRELSG_0304500	PF3D7_0407300		0
PGAL8A_00058000	conserved Plasmodium protein, unknown function	1	318	18.776	PRELSG_0304600	PF3D7_0407400		0
PGAL8A_00058100	mitochondrial carrier protein, putative	3	1143	35.582	PRELSG_0304700	PF3D7_0407500		1		Pfam:PF00153.22(Mito_carr)
PGAL8A_00058200	conserved Plasmodium protein, unknown function	1	3240	1.042	PRELSG_0304800	PF3D7_0407600		0
PGAL8A_00058300	conserved Plasmodium protein, unknown function	6	5073	77.739	PRELSG_0304900	PF3D7_0407700		0		Pfam:PF04858.8(TH1)
PGAL8A_00058400	conserved Plasmodium protein, unknown function	1	4068	104.886	PRELSG_0305000	PF3D7_0407800		0
PGAL8A_00058500	AAA family ATPase, putative	1	1803	14.324	PRELSG_0305100	PF3D7_0407900		0		Pfam:PF00004.24(AAA)
PGAL8A_00058600	conserved Plasmodium protein, unknown function	1	513	5.122	PRELSG_0305200	PF3D7_0408000		0
PGAL8A_00058700	conserved Plasmodium protein, unknown function	1	3783	50.206	PRELSG_0305300	PF3D7_0408100		0
PGAL8A_00058800	conserved Plasmodium protein, unknown function	1	1416	20.577	PRELSG_0305400	PF3D7_0408200		0
PGAL8A_00058900	zinc finger, RAN binding protein, putative	5	801	61.792	PRELSG_0305500	PF3D7_0408300		0		Pfam:PF00641.13(zf-RanBP)
PGAL8A_00059000	conserved Plasmodium protein, unknown function	3	1389	61.946	PRELSG_0305600	PF3D7_0408400		0
PGAL8A_00059100	flap endonuclease 1, putative	1	1683	100.525	PRELSG_0305700	PF3D7_0408500		0		Pfam:PF00752.12(XPG_N),Pfam:PF00867.13(XPG_I)
PGAL8A_00059200	sporozoite invasion-associated protein 1,putative	1	2952	0.402	PRELSG_0305800	PF3D7_0408600		0	22
PGAL8A_00059300	sporozoite micronemal protein essential for celltraversal, putative	8	2577	0.943	PRELSG_0305900	PF3D7_0408700		1		Pfam:PF01823.14(MACPF)
PGAL8A_00059400	conserved Plasmodium protein, unknown function	1	951	2.382	PRELSG_0306000	PF3D7_0408800		0	23
PGAL8A_00059500	tRNA N6-adenosine threonylcarbamoyltransferase,putative	5	2082	23.785	PRELSG_0306100			1		Pfam:PF00814.20(Peptidase_M22)
PGAL8A_00059600	conserved Plasmodium protein, unknown function	1	5970	5.632	PRELSG_0306200	PF3D7_0409000		2	19
PGAL8A_00059700	U4/U6 small nuclear ribonucleoprotein PRP31,putative	2	1512	190.871	PRELSG_0306300	PF3D7_0409100		0		Pfam:PF01798.13(Nop),Pfam:PF08060.8(NOSIC),Pfam:PF09785.4(Prp31_C)
PGAL8A_00059800	protein SOF1, putative	1	1395	61.296	PRELSG_0306400	PF3D7_0409200		0		Pfam:PF00400.27(WD40),Pfam:PF04158.9(Sof1)
PGAL8A_00059900	conserved Plasmodium protein, unknown function	3	2544	42.582	PRELSG_0306500	PF3D7_0409300		0
PGAL8A_00060000	heat shock protein 40, putative	1	1995	133.86	PRELSG_0306600	PF3D7_0409400		0		Pfam:PF00226.26(DnaJ),Pfam:PF00684.14(DnaJ_CXXCXGXG),Pfam:PF01556.13(CTDII)
PGAL8A_00060100	conserved Plasmodium protein, unknown function	2	1209	11.36	PRELSG_0306700	PF3D7_0409500		3
PGAL8A_00060200	replication protein A1, large subunit, putative	1	2988	48.528	PRELSG_0306800	PF3D7_0409600		0		Pfam:PF01336.20(tRNA_anti-codon),Pfam:PF08646.5(Rep_fac-A_C)
PGAL8A_00060300	peptide chain release factor 2, putative	4	591	16.957	PRELSG_0306900	PF3D7_0409700	8.9638	1		Pfam:PF00472.15(RF-1)
PGAL8A_00060400	zinc finger protein, putative	1	1626	88.834	PRELSG_0307000	PF3D7_0409800		0		Pfam:PF12756.2(zf-C2H2_2)
PGAL8A_00060500	actin-like protein, putative	7	1233	4.498	PRELSG_0307100	PF3D7_0409900		0		Pfam:PF00022.14(Actin)
PGAL8A_00060600	erythrocyte vesicle protein 1, putative	2	1983	0.385	PRELSG_0307200	PF3D7_0410000		0
PGAL8A_00060900	protein phosphatase PPM1, putative	2	3240	56.177	PRELSG_0307500	PF3D7_0410300		0		Pfam:PF00481.16(PP2C)
PGAL8A_00061000	exosome complex component RRP4, putative	1	999	102.154	PRELSG_0307600	PF3D7_0410400		0
PGAL8A_00061100	conserved Plasmodium protein, unknown function	1	684	31.857	PRELSG_0307700	PF3D7_0410500		0
PGAL8A_00061200	conserved Plasmodium protein, unknown function	3	981	31.121	PRELSG_0307800	PF3D7_0410600		0
PGAL8A_00061300	GTPase, putative	1	2286	29.085	PRELSG_0307900	PF3D7_0410700		0	18	Pfam:PF01926.18(MMR_HSR1)
PGAL8A_00061400	conserved Plasmodium protein, unknown function	1	3381	94.388	PRELSG_0308000	PF3D7_0410800		0
PGAL8A_00061500	conserved Plasmodium protein, unknown function	1	2487	51.27	PRELSG_0308100	PF3D7_0410900		0
PGAL8A_00061600	conserved Plasmodium protein, unknown function	1	3477	23.484	PRELSG_0308200	PF3D7_0411000		0
PGAL8A_00061700	conserved Plasmodium protein, unknown function	1	597	42.679	PRELSG_0308300	PF3D7_0411100		0
PGAL8A_00061800	conserved Plasmodium protein, unknown function	1	2724	8.181	PRELSG_0308400	PF3D7_0411200		2		Pfam:PF01171.15(ATP_bind_3)
PGAL8A_00061900	conserved Plasmodium protein, unknown function	1	1971	8.437	PRELSG_0308500	PF3D7_0411300		0
PGAL8A_00062000	DEAD box ATP-dependent RNA helicase, putative	1	3726	24.385	PRELSG_0308600	PF3D7_0411400		0		Pfam:PF00270.24(DEAD),Pfam:PF00271.26(Helicase_C)
PGAL8A_00062300	conserved Plasmodium protein, unknown function	2	780	2.501	PRELSG_0308900	PF3D7_0411700		0	20
PGAL8A_00062400	conserved Plasmodium protein, unknown function	1	5232	54.61	PRELSG_0309000	PF3D7_0411800		2
PGAL8A_00062500	conserved Plasmodium protein, unknown function	10	10611	6.411	PRELSG_0309100			7
PGAL8A_00062600	DNA polymerase alpha catalytic subunit A,putative	2	4700	74.499	PRELSG_0309200	PF3D7_0411900		0
PGAL8A_00062700	conserved Plasmodium protein, unknown function	1	1530	61.965	PRELSG_0309300	PF3D7_0412000		2		Pfam:PF10601.4(zf-LITAF-like)
PGAL8A_00062800	mitochondrial ribosomal protein S12 precursor,putative	1	936	48.216	PRELSG_0309400	PF3D7_0412100		0		Pfam:PF00164.20(Ribosom_S12_S23)
PGAL8A_00062900	conserved Plasmodium protein, unknown function	1	975	8.657	PRELSG_0309500	PF3D7_0412200		0
PGAL8A_00063000	phosphopantothenoylcysteine synthetase, putative	1	1485	17.147	PRELSG_0309600	PF3D7_1102400		0		Pfam:PF04127.10(DFP)
PGAL8A_00063100	RNA-binding protein, putative	1	3072	71.402	PRELSG_0309700	PF3D7_0716000		0		Pfam:PF14259.1(RRM_6)
PGAL8A_00063200	large ribosomal subunit assembling factor,putative	2	2838	26.338	PRELSG_0309800	PF3D7_0716100		0
PGAL8A_00063300	conserved Plasmodium protein, unknown function	1	1425	13.304	PRELSG_0309900	PF3D7_0716200		0		Pfam:PF04194.8(PDCD2_C)
PGAL8A_00063400	conserved Plasmodium protein, unknown function	2	1299	338.712	PRELSG_0310000	PF3D7_0716300		0	22
PGAL8A_00063500	transcription initiation factor IIA subunit 1,putative	9	486	65.845	PRELSG_0310100	PF3D7_0716400		0		Pfam:PF03153.8(TFIIA)
PGAL8A_00063600	conserved Plasmodium protein, unknown function	10	1356	17.97	PRELSG_0310200	PF3D7_0716500		0
PGAL8A_00063700	cysteine desulfurase, putative	2	1656	17.899	PRELSG_0310300	PF3D7_0716600		0	17	Pfam:PF00266.14(Aminotran_5)
PGAL8A_00063800	conserved Plasmodium protein, unknown function	1	2913	10.94	PRELSG_0310400	PF3D7_0716700		0
PGAL8A_00063900	eukaryotic translation initiation factor 3subunit I, putative	3	984	99.01	PRELSG_0310500	PF3D7_0716800		0		Pfam:PF00400.27(WD40)
PGAL8A_00064000	drug/metabolite transporter, putative	1	969	3.97	PRELSG_0310600	PF3D7_0716900		9		Pfam:PF08449.6(UAA)
PGAL8A_00064100	conserved Plasmodium membrane protein, unknownfunction	14	900	12.989	PRELSG_0310700	PF3D7_0717000		7
PGAL8A_00064200	conserved Plasmodium protein, unknown function	2	2379	41.713	PRELSG_0310800	PF3D7_0717100		3		Pfam:PF01661.16(Macro)
PGAL8A_00064300	conserved Plasmodium protein, unknown function	2	981	186.365	PRELSG_0310900	PF3D7_0717200		0
PGAL8A_00064400	transcription initiation factor IIE subunitalpha, putative	4	1167	87.98	PRELSG_0311000	PF3D7_0717300		0		Pfam:PF02002.12(TFIIE_alpha)
PGAL8A_00064500	queuine tRNA-ribosyltransferase, putative	1	2148	22.849	PRELSG_0311100	PF3D7_0717400		0		Pfam:PF01702.13(TGT)
PGAL8A_00064600	calcium dependent protein kinase 4, putative	2	1587	233.223	PRELSG_0311200	PF3D7_0717500		0		Pfam:PF00069.20(Pkinase),Pfam:PF13499.1(EF-hand_7)
PGAL8A_00064700	conserved Plasmodium protein, unknown function	7	2577	65.938	PRELSG_0311300	PF3D7_0717600		0
PGAL8A_00064800	serine--tRNA ligase, putative	1	1527	58.96	PRELSG_0311400	PF3D7_0717700		0		Pfam:PF00587.20(tRNA-synt_2b),Pfam:PF02403.17(Seryl_tRNA_N)
PGAL8A_00064900	conserved Plasmodium protein, unknown function	1	3729	7.504	PRELSG_0311500	PF3D7_0717800		0
PGAL8A_00065000	thioredoxin-like protein	8	1293	57.809	PRELSG_0311600	PF3D7_0717900		0		Pfam:PF00085.15(Thioredoxin)
PGAL8A_00065100	dynein heavy chain, putative	11	15357	13.212	PRELSG_0311700	PF3D7_0718000		2		Pfam:PF03028.10(Dynein_heavy),Pfam:PF12774.2(AAA_6)
PGAL8A_00065200	exported serine/threonine protein kinase,putative	1	7182	45.815	PRELSG_0311800	PF3D7_0718100		0
PGAL8A_00065300	Plasmodium exported protein, unknown function	2	840	63.971	PRELSG_1446000		1.9636	1
PGAL8A_00065400	reticulocyte binding protein, putative	2	7752	17.811				1	24
PGAL8A_00065500	ABC transporter C family member 1, putative	1	5193	25.608				12		Pfam:PF00005.22(ABC_tran),Pfam:PF00664.18(ABC_membrane)
PGAL8A_00065600	conserved Plasmodium protein, unknown function	1	3225	191.583	PRELSG_0028200			1
PGAL8A_00065700	conserved Plasmodium protein, unknown function	5	708	72.488	PRELSG_1261800	PF3D7_1336200		0
PGAL8A_00065800	hypothetical protein	2	408	8.271				1
PGAL8A_00065900	Plasmodium exported protein, unknown function	2	687	16.283			4.8903	3
PGAL8A_00066000	WD repeat-containing protein 26, putative	1	3108	81.183	PRELSG_1013200	PF3D7_0518600		0		Pfam:PF00400.27(WD40)
PGAL8A_00066100	mRNA-binding protein PUF1, putative	5	3723	45.158	PRELSG_1013100	PF3D7_0518700		0		Pfam:PF00806.14(PUF)
PGAL8A_00066200	secreted ookinete protein, putative	7	606	13.656	PRELSG_1013000	PF3D7_0518800		0	21
PGAL8A_00066300	conserved Plasmodium protein, unknown function	4	642	3.627	PRELSG_1012900	PF3D7_0518900		0
PGAL8A_00066400	histone RNA hairpin-binding protein, putative	1	867	47.789	PRELSG_1012800	PF3D7_0519000		0		Pfam:PF15247.1(SLBP_RNA_bind)
PGAL8A_00066500	mitochondrial ribosomal protein L14 precursor,putative	1	375	35.493	PRELSG_1012700	PF3D7_0519100		0		Pfam:PF00238.14(Ribosomal_L14)
PGAL8A_00066600	V-type proton ATPase 16 kDa proteolipid subunit,putative	5	495	438.901	PRELSG_1012600	PF3D7_0519200		4		Pfam:PF00137.16(ATP-synt_C)
PGAL8A_00066700	protoheme IX farnesyltransferase, putative	1	1467	61.055	PRELSG_1012500	PF3D7_0519300		4		Pfam:PF01040.13(UbiA)
PGAL8A_00066800	40S ribosomal protein S24, putative	2	402	434.103	PRELSG_1012400	PF3D7_0519400		0		Pfam:PF01282.14(Ribosomal_S24e)
PGAL8A_00066900	carbon catabolite repressor protein 4, putative	2	5775	49.058	PRELSG_1012300	PF3D7_0519500		0		Pfam:PF03372.18(Exo_endo_phos)
PGAL8A_00067000	zinc finger protein, putative	1	1776	9.727	PRELSG_1012200	PF3D7_0519600		0		Pfam:PF07967.8(zf-C3HC)
PGAL8A_00067100	conserved Plasmodium protein, unknown function	2	381	137.426	PRELSG_1012100	PF3D7_0519700		0		Pfam:PF13865.1(FoP_duplication)
PGAL8A_00067200	conserved Plasmodium protein, unknown function	2	3258	71.117	PRELSG_1012000	PF3D7_0519800		0
PGAL8A_00067300	conserved Plasmodium protein, unknown function	1	1293	86.452	PRELSG_1011900	PF3D7_0519900		1	27
PGAL8A_00067400	40S ribosomal protein S9, putative	3	573	878.792	PRELSG_1011800	PF3D7_0520000		0		Pfam:PF00163.14(Ribosomal_S4),Pfam:PF01479.20(S4)
PGAL8A_00067500	protein phosphatase PPM9, putative	6	1920	83.95	PRELSG_1011700	PF3D7_0520100		0		Pfam:PF00481.16(PP2C)
PGAL8A_00067600	conserved Plasmodium protein, unknown function	1	2427	23.12	PRELSG_1011600	PF3D7_0520200		0
PGAL8A_00067700	conserved Plasmodium protein, unknown function	1	900	79.294	PRELSG_1011400	PF3D7_0520400		0
PGAL8A_00067800	phosphomethylpyrimidine kinase, putative	1	972	9.671	PRELSG_1011300	PF3D7_0520500		0		Pfam:PF08543.7(Phos_pyr_kin)
PGAL8A_00067900	bis(5'-nucleosyl)-tetraphosphatase[asymmetrical], putative	5	447	16.032	PRELSG_1011200	PF3D7_0520600		0		Pfam:PF00293.23(NUDIX)
PGAL8A_00068000	conserved Plasmodium protein, unknown function	1	2772	28.727	PRELSG_1011100	PF3D7_0520700		0		Pfam:PF05179.9(CDC73)
PGAL8A_00068100	conserved Plasmodium protein, unknown function	1	5553	23.223	PRELSG_1011000	PF3D7_0520800		0
PGAL8A_00068200	S-adenosyl-L-homocysteine hydrolase, putative	1	1434	171.537	PRELSG_1010900	PF3D7_0520900		0		Pfam:PF00670.16(AdoHcyase_NAD),Pfam:PF05221.12(AdoHcyase)
PGAL8A_00068300	conserved Plasmodium protein, unknown function	2	1902	93.281	PRELSG_1010800	PF3D7_0521000		0
PGAL8A_00068400	conserved Plasmodium protein, unknown function	8	4446	6.959	PRELSG_1010700	PF3D7_0521100		10
PGAL8A_00068500	conserved Plasmodium protein, unknown function	1	978	13.087	PRELSG_1010600	PF3D7_0521200		0
PGAL8A_00068600	conserved Plasmodium protein, unknown function	3	3693	31.766	PRELSG_1010500	PF3D7_0521300		0
PGAL8A_00068700	conserved Plasmodium protein, unknown function	1	1533	19.566	PRELSG_1010400	PF3D7_0521400		0	20
PGAL8A_00068800	ribosomal large subunit pseudouridylate synthase,putative	2	1488	21.797	PRELSG_1010300	PF3D7_0521500		0		Pfam:PF00849.17(PseudoU_synth_2)
PGAL8A_00068900	conserved Plasmodium protein, unknown function	1	279	3.919	PRELSG_1010200	PF3D7_0521600		0
PGAL8A_00069000	ATP-dependent RNA helicase DDX1, putative	1	2367	10.572	PRELSG_1010100	PF3D7_0521700		0		Pfam:PF00270.24(DEAD),Pfam:PF00271.26(Helicase_C),Pfam:PF00622.23(SPRY)
PGAL8A_00069100	nucleotide binding protein, putative	6	1887	11.643	PRELSG_1010000	PF3D7_0521800		0		Pfam:PF03969.11(AFG1_ATPase)
PGAL8A_00069200	conserved Plasmodium protein, unknown function	5	4563	8.103	PRELSG_1009900	PF3D7_0521900		0
PGAL8A_00069300	conserved Plasmodium protein, unknown function	1	2139	60.545	PRELSG_1009700	PF3D7_0522100		0
PGAL8A_00069400	transcription initiation factor TFIID subunit 10,putative	4	357	69.564	PRELSG_1009600	PF3D7_0522200		0		Pfam:PF03540.8(TFIID_30kDa)
PGAL8A_00069500	S-adenosylmethionine-dependent methyltransferase,putative	10	822	135.548	PRELSG_1009500	PF3D7_0522300		0		Pfam:PF08241.7(Methyltransf_11),Pfam:PF12589.3(WBS_methylT)
PGAL8A_00069600	conserved Plasmodium protein, unknown function	4	24837	32.079	PRELSG_1009400	PF3D7_0522400		3
PGAL8A_00069700	50S ribosomal protein L17, apicoplast, putative	3	501	26.347	PRELSG_1009300	PF3D7_0522500		0	17	Pfam:PF01196.14(Ribosomal_L17)
PGAL8A_00069800	inner membrane complex protein, putative	1	1386	52.63	PRELSG_1009200	PF3D7_0522600		8		Pfam:PF05653.9(Mg_trans_NIPA)
PGAL8A_00069900	iron-sulfur assembly protein, putative	5	516	12.76	PRELSG_1009100	PF3D7_0522700		0	19	Pfam:PF01521.15(Fe-S_biosyn)
PGAL8A_00070000	pre-mRNA-splicing factor BUD31, putative	3	444	47.27	PRELSG_1009000	PF3D7_0522800		0		Pfam:PF01125.12(G10)
PGAL8A_00070100	zinc finger protein, putative	1	4524	62.266	PRELSG_1008900	PF3D7_0522900		0
PGAL8A_00070200	ABC transporter B family member 1, putative	1	4131	107.346	PRELSG_1008800	PF3D7_0523000		11		Pfam:PF00005.22(ABC_tran),Pfam:PF00664.18(ABC_membrane)
PGAL8A_00070300	mitochondrial processing peptidase alpha subunit,putative	2	1602	127.076	PRELSG_1008700	PF3D7_0523100		0		Pfam:PF00675.15(Peptidase_M16),Pfam:PF05193.16(Peptidase_M16_C)
PGAL8A_00070400	conserved Plasmodium protein, unknown function	2	2850	5.341	PRELSG_1008600	PF3D7_0523200		0
PGAL8A_00070500	conserved Plasmodium protein, unknown function	3	393	144.238	PRELSG_1008500	PF3D7_0523300		0
PGAL8A_00070600	DnaJ protein, putative	4	1593	138.88	PRELSG_1008400	PF3D7_0523400		1		Pfam:PF00226.26(DnaJ),Pfam:PF14308.1(DnaJ-X)
PGAL8A_00070700	dynein light chain Tctex-type, putative	6	345	16.987	PRELSG_1008300	PF3D7_0523500		0		Pfam:PF03645.8(Tctex-1)
PGAL8A_00070800	conserved Plasmodium protein, unknown function	5	624	39.131	PRELSG_1008200	PF3D7_0523600		0
PGAL8A_00070900	conserved Plasmodium protein, unknown function	2	3843	13.874	PRELSG_1008100	PF3D7_0523700		3
PGAL8A_00071000	transporter, putative	1	1935	31.885	PRELSG_1008000	PF3D7_0523800		12		Pfam:PF01566.13(Nramp)
PGAL8A_00071100	conserved Plasmodium protein, unknown function	3	597	16.45	PRELSG_1007900	PF3D7_0523900		4		Pfam:PF03203.9(MerC)
PGAL8A_00071200	karyopherin beta, putative	1	3372	487.748	PRELSG_1007800	PF3D7_0524000		0		Pfam:PF13646.1(HEAT_2)
PGAL8A_00071300	conserved Plasmodium protein, unknown function	2	2814	10.391	PRELSG_1007700	PF3D7_0524100		0
PGAL8A_00071400	conserved Plasmodium protein, unknown function	3	462	16.635	PRELSG_1007600	PF3D7_0524200		4
PGAL8A_00071500	conserved Plasmodium protein, unknown function	1	1302	65.24	PRELSG_1007500	PF3D7_0524300		0		Pfam:PF10199.4(Adaptin_binding)
PGAL8A_00071600	ribosome-interacting GTPase 1, putative	1	1098	111.162	PRELSG_1007400	PF3D7_0524400		0		Pfam:PF01926.18(MMR_HSR1),Pfam:PF02824.16(TGS)
PGAL8A_00071700	conserved Plasmodium membrane protein, unknownfunction	1	369	16.031	PRELSG_1007300	PF3D7_0524500		0
PGAL8A_00071800	50S ribosomal protein L12, apicoplast, putative	1	726	75.056	PRELSG_1007200	PF3D7_0524600		1		Pfam:PF00542.14(Ribosomal_L12)
PGAL8A_00071900	mitochondrial import receptor subunit TOM22,putative	1	318	28.769	PRELSG_1007100	PF3D7_0524700		1
PGAL8A_00072000	ubiquitin fusion degradation protein 1, putative	2	1944	7.139	PRELSG_1007000	PF3D7_0524800		0		Pfam:PF03152.9(UFD1)
PGAL8A_00072100	hypothetical protein	1	1143	53.021	PRELSG_1006900			0
PGAL8A_00072200	tRNA-YW synthesizing protein, putative	1	2592	16.716	PRELSG_1006800	PF3D7_0524900		0		Pfam:PF00258.20(Flavodoxin_1),Pfam:PF04055.16(Radical_SAM),Pfam:PF08608.7(Wyosine_form)
PGAL8A_00072300	zinc finger protein, putative	1	1500	105.064	PRELSG_1006700	PF3D7_0525000		0
PGAL8A_00072400	acyl-CoA synthetase, putative	1	2022	307.123	PRELSG_1006600	PF3D7_0525100		0		Pfam:PF00501.23(AMP-binding)
PGAL8A_00072500	structural maintenance of chromosomes protein 6,putative	3	4491	85.259	PRELSG_1006500	PF3D7_0525200		0
PGAL8A_00072600	conserved Plasmodium protein, unknown function	1	1182	76.801	PRELSG_1006400	PF3D7_0525300		1
PGAL8A_00072700	G-protein coupled receptor, putative	1	1353	24.413	PRELSG_1006300	PF3D7_0525400		4		Pfam:PF05147.8(LANC_like)
PGAL8A_00072800	WD repeat-containing protein, putative	1	4731	23.571	PRELSG_1006200	PF3D7_0525500		0		Pfam:PF00400.27(WD40)
PGAL8A_00072900	RNA methyltransferase, putative	2	1053	12.14	PRELSG_1006100	PF3D7_0525600		0		Pfam:PF00588.14(SpoU_methylase)
PGAL8A_00073000	conserved Plasmodium protein, unknown function	2	396	14.422	PRELSG_1006000	PF3D7_0525700		0	26
PGAL8A_00073100	inner membrane complex protein 1g, putative	1	903	274.533	PRELSG_1005900	PF3D7_0525800		0		Pfam:PF12314.3(IMCp)
PGAL8A_00073200	NIMA related kinase 2, putative	8	879	3.258	PRELSG_1005800	PF3D7_0525900		1		Pfam:PF00069.20(Pkinase)
PGAL8A_00073300	RAP protein, putative	1	1956	3.044	PRELSG_1005700	PF3D7_0526000		2		Pfam:PF08373.5(RAP)
PGAL8A_00073400	conserved Plasmodium protein, unknown function	1	1017	3.674	PRELSG_1005600	PF3D7_0526100		5	22
PGAL8A_00073500	ADP-ribosylation factor GTPase-activatingprotein, putative	6	1293	18.116	PRELSG_1005500			0		Pfam:PF01412.13(ArfGap)
PGAL8A_00073600	nucleolar Jumonji domain interacting protein,putative	1	969	40.777	PRELSG_1005400	PF3D7_0526300		0		Pfam:PF00400.27(WD40)
PGAL8A_00073700	conserved Plasmodium protein, unknown function	1	1053	12.289	PRELSG_1005300	PF3D7_0526400		0
PGAL8A_00073800	conserved Plasmodium protein, unknown function	1	3546	90.659	PRELSG_1005200	PF3D7_0526500		0
PGAL8A_00073900	conserved Plasmodium protein, unknown function	1	9900	0.241	PRELSG_0031000	PF3D7_0526600		0
PGAL8A_00074000	conserved Plasmodium protein, unknown function	1	1761	47.275	PRELSG_1005100	PF3D7_0526700		2		Pfam:PF05542.6(DUF760)
PGAL8A_00074100	conserved Plasmodium protein, unknown function	1	852	22.418	PRELSG_1005000	PF3D7_0526800		0
PGAL8A_00074200	transmembrane emp24 domain-containing protein,putative	3	642	137.369	PRELSG_1004900	PF3D7_0526900		2	27	Pfam:PF01105.19(EMP24_GP25L)
PGAL8A_00074300	DNA replication licensing factor MCM3, putative	2	2871	263.152	PRELSG_1004800	PF3D7_0527000		0		Pfam:PF00493.18(MCM),Pfam:PF14551.1(MCM_N)
PGAL8A_00074400	ubiquitin-conjugating enzyme E2 N, putative	4	459	84.392	PRELSG_1004700	PF3D7_0527100		0		Pfam:PF00179.21(UQ_con)
PGAL8A_00074500	ubiquitin carboxyl-terminal hydrolase 14,putative	2	1755	276.061	PRELSG_1004600	PF3D7_0527200		0		Pfam:PF00240.18(ubiquitin),Pfam:PF00443.24(UCH)
PGAL8A_00074600	methionine aminopeptidase 1a, putative	3	990	21.978	PRELSG_1004500	PF3D7_0527300		0		Pfam:PF00557.19(Peptidase_M24)
PGAL8A_00074700	conserved Plasmodium protein, unknown function	1	525	55.71	PRELSG_1004400	PF3D7_0527400		2
PGAL8A_00074800	Hsc70-interacting protein, putative	2	1287	241.507	PRELSG_1004300	PF3D7_0527500		0		Pfam:PF13414.1(TPR_11)
PGAL8A_00074900	conserved Plasmodium protein, unknown function	11	1377	60.287	PRELSG_1004200	PF3D7_0527600		0
PGAL8A_00075200	RNA helicase 1, putative	1	1953	39.445	PRELSG_1003900	PF3D7_0527900		0		Pfam:PF00270.24(DEAD),Pfam:PF00271.26(Helicase_C)
PGAL8A_00075300	proteasome maturation factor UMP1, putative	1	375	69.036	PRELSG_1003800	PF3D7_0528000		0		Pfam:PF05348.6(UMP1)
PGAL8A_00075400	AP-1 complex subunit beta, putative	8	2769	183.937	PRELSG_1003700	PF3D7_0528100		0		Pfam:PF01602.15(Adaptin_N),Pfam:PF09066.5(B2-adapt-app_C)
PGAL8A_00075500	eukaryotic translation initiation factor 3subunit E, putative	2	1548	142.252	PRELSG_1003600	PF3D7_0528200		1		Pfam:PF01399.22(PCI)
PGAL8A_00075600	conserved Plasmodium protein, unknown function	1	1542	36.919	PRELSG_1003500	PF3D7_0528300		0
PGAL8A_00075700	palmitoyltransferase DHHC7, putative	8	1209	61.39	PRELSG_1003400	PF3D7_0528400		4		Pfam:PF01529.15(zf-DHHC)
PGAL8A_00075800	F-actin-capping protein subunit alpha, putative	9	909	22.414	PRELSG_1003300	PF3D7_0528500		0		Pfam:PF01267.12(F-actin_cap_A)
PGAL8A_00075900	conserved Plasmodium protein, unknown function	1	303	15.915	PRELSG_1003200	PF3D7_0528600		0
PGAL8A_00076000	peptidyl-prolyl cis-trans isomerase, putative	1	609	24.956	PRELSG_1003100	PF3D7_0528700		0		Pfam:PF00160.16(Pro_isomerase)
PGAL8A_00076100	nucleolar preribosomal GTPase, putative	1	1449	14.131	PRELSG_1003000	PF3D7_0528800		0		Pfam:PF08701.6(GN3L_Grn1)
PGAL8A_00076200	conserved Plasmodium protein, unknown function	9	696	14.388	PRELSG_1002900	PF3D7_0528900		0	22
PGAL8A_00076300	conserved Plasmodium protein, unknown function	1	2118	11.551	PRELSG_1002800	PF3D7_0529000		3		Pfam:PF13517.1(VCBS)
PGAL8A_00076400	thioredoxin-like protein, putative	1	489	24.645	PRELSG_1002700	PF3D7_0529100		0
PGAL8A_00076500	sugar transporter, putative	6	1692	0.93	PRELSG_1002600	PF3D7_0529200		11		Pfam:PF13347.1(MFS_2)
PGAL8A_00076600	apicoplast TIC22 precursor, putative	2	837	15.573	PRELSG_1002500	PF3D7_0529300	4.00008	1	18	Pfam:PF04278.7(Tic22)
PGAL8A_00076700	conserved Plasmodium protein, unknown function	9	4389	253.25	PRELSG_1002400			0
PGAL8A_00076800	cell cycle regulator protein, putative	6	543	51.714	PRELSG_1002300	PF3D7_0529500		0		Pfam:PF01472.15(PUA)
PGAL8A_00077000	conserved Plasmodium protein, unknown function	2	2517	21.805	PRELSG_1002100	PF3D7_0529700		0
PGAL8A_00077100	conserved Plasmodium protein, unknown function	1	5082	78.739	PRELSG_1002000	PF3D7_0529800		0
PGAL8A_00077200	RING zinc finger protein, putative	2	771	44.811	PRELSG_1001900	PF3D7_0529900		4
PGAL8A_00077300	surface-associated interspersed protein (SURFIN)	2	2376	0.642				1
PGAL8A_00077400	von Willebrand factor A domain-related protein,putative	1	879	6.256	PRELSG_0116700	PF3D7_0801300		0	18	Pfam:PF00092.23(VWA)
PGAL8A_00077500	hypothetical protein	2	240	10.226	PRELSG_0116600	PF3D7_0801400		0
PGAL8A_00077600	protein kinase, putative	5	3111	18.997	PRELSG_0116500			0		Pfam:PF00069.20(Pkinase)
PGAL8A_00077700	nucleolar protein 10, putative	1	1617	20.335	PRELSG_0116400	PF3D7_0801500		0
PGAL8A_00077800	conserved Plasmodium protein, unknown function	1	372	168.494	PRELSG_0116300	PF3D7_0801600		1
PGAL8A_00077900	sentrin-specific protease 2, putative	3	4962	41.824	PRELSG_0116200	PF3D7_0801700		0
PGAL8A_00078000	mannose-6-phosphate isomerase, putative	1	2313	43.72	PRELSG_0116100	PF3D7_0801800		1		Pfam:PF01238.16(PMI_typeI)
PGAL8A_00078100	conserved Plasmodium protein, unknown function	1	10176	37.731	PRELSG_0116000	PF3D7_0801900		0		Pfam:PF01593.19(Amino_oxidase),Pfam:PF13450.1(NAD_binding_8)
PGAL8A_00078200	glutamate dehydrogenase, putative	1	3513	67.941	PRELSG_0115900	PF3D7_0802000		0		Pfam:PF00208.16(ELFV_dehydrog),Pfam:PF05088.7(Bac_GDH)
PGAL8A_00078300	transcription factor with AP2 domain(s),putative	2	8124	94.107	PRELSG_0115800	PF3D7_0802100		0		Pfam:PF00847.15(AP2)
PGAL8A_00078400	1-cys peroxiredoxin, putative	1	669	279.347	PRELSG_0115700	PF3D7_0802200		0		Pfam:PF00578.16(AhpC-TSA),Pfam:PF10417.4(1-cysPrx_C)
PGAL8A_00078500	periodic tryptophan protein 2, putative	1	3165	20.194	PRELSG_0115600	PF3D7_0802300		0		Pfam:PF00400.27(WD40),Pfam:PF04003.7(Utp12)
PGAL8A_00078600	conserved Plasmodium protein, unknown function	3	3375	24.714	PRELSG_0115500	PF3D7_0802400		2		Pfam:PF00134.18(Cyclin_N)
PGAL8A_00078700	inositol 5-phosphatase, putative	1	3690	27.379	PRELSG_0115400	PF3D7_0802500		2		Pfam:PF02383.13(Syja_N)
PGAL8A_00078800	adenylyl cyclase beta, putative	5	5289	27.927	PRELSG_0115300	PF3D7_0802600		0		Pfam:PF00211.15(Guanylate_cyc)
PGAL8A_00078900	conserved Plasmodium protein, unknown function	4	1224	5.251	PRELSG_0115200	PF3D7_0802700		0
PGAL8A_00079000	serine/threonine protein phosphatase 2B catalyticsubunit A, putative	2	1584	40.211	PRELSG_0115100	PF3D7_0802800		0		Pfam:PF00149.23(Metallophos)
PGAL8A_00079100	conserved Plasmodium protein, unknown function	2	396	35.24	PRELSG_0115000	PF3D7_0802900		0
PGAL8A_00079200	peptidyl-prolyl cis-trans isomerase, putative	1	1956	48.337	PRELSG_0114900	PF3D7_0803000		0		Pfam:PF00160.16(Pro_isomerase),Pfam:PF08231.7(SYF2)
PGAL8A_00079300	U3 small nucleolar RNA-associated protein 14,putative	1	3138	34.424	PRELSG_0114800	PF3D7_0803100		0
PGAL8A_00079400	filament assembling protein, putative	2	1545	43.813	PRELSG_0114700	PF3D7_0803200		0		Pfam:PF06705.6(SF-assemblin)
PGAL8A_00079500	mitogen-activated protein kinase organizer 1,putative	7	1095	63.068	PRELSG_0114600	PF3D7_0803300		0		Pfam:PF00400.27(WD40)
PGAL8A_00079600	DNA repair and recombination protein RAD54,putative	1	3096	102.543	PRELSG_0114500	PF3D7_0803400		0		Pfam:PF00176.18(SNF2_N),Pfam:PF00271.26(Helicase_C)
PGAL8A_00079700	AAA family ATPase, putative	1	2976	32.481	PRELSG_0114400	PF3D7_0803500		0		Pfam:PF00004.24(AAA)
PGAL8A_00079900	conserved Plasmodium protein, unknown function	15	4179	40.606	PRELSG_0114300	PF3D7_0803600		0		Pfam:PF02893.15(GRAM)
PGAL8A_00080000	tubulin gamma chain, putative	1	1359	155.477	PRELSG_0114200	PF3D7_0803700		0		Pfam:PF00091.20(Tubulin),Pfam:PF03953.12(Tubulin_C)
PGAL8A_00080100	20S proteasome beta subunit, putative	2	771	111.62	PRELSG_0114100	PF3D7_0803800		0		Pfam:PF00227.21(Proteasome)
PGAL8A_00080300	cactin homolog, putative	3	1629	113.704	PRELSG_0113900	PF3D7_0804000		0		Pfam:PF09732.4(CactinC_cactus),Pfam:PF10312.4(Cactin_mid)
PGAL8A_00080400	conserved Plasmodium protein, unknown function	1	2433	5.092	PRELSG_0113800	PF3D7_0804300		0		Pfam:PF04438.11(zf-HIT)
PGAL8A_00080500	methionine aminopeptidase 1c, putative	1	1863	40.971	PRELSG_0113700	PF3D7_0804400		0		Pfam:PF00557.19(Peptidase_M24)
PGAL8A_00080600	conserved Plasmodium protein, unknown function	3	13998	55.799	PRELSG_0113600	PF3D7_0804500		6
PGAL8A_00080700	U2 snRNA/tRNA pseudouridine synthase, putative	3	1728	25.513	PRELSG_0113500	PF3D7_0804600		0		Pfam:PF01416.15(PseudoU_synth_1)
PGAL8A_00080800	conserved Plasmodium protein, unknown function	1	7155	22.869	PRELSG_0113400			0
PGAL8A_00080900	peptidyl-prolyl cis-trans isomerase, putative	1	648	464.036	PRELSG_0113300	PF3D7_0804800		0		Pfam:PF00160.16(Pro_isomerase)
PGAL8A_00081000	GTPase-activating protein, putative	1	1263	119.249	PRELSG_0113200	PF3D7_0804900		0		Pfam:PF01412.13(ArfGap)
PGAL8A_00081100	alpha/beta hydrolase, putative	7	735	34.227	PRELSG_0113100	PF3D7_0805000		0		Pfam:PF12695.2(Abhydrolase_5)
PGAL8A_00081200	conserved Plasmodium protein, unknown function	1	1518	52.334	PRELSG_0113000	PF3D7_0805100		0
PGAL8A_00081300	IMC-associated apicomplexan protein, putative	1	282	30.238	PRELSG_0112900	PF3D7_0805200		0
PGAL8A_00081400	conserved Plasmodium protein, unknown function	1	3927	16.308	PRELSG_0112800	PF3D7_0805300		0
PGAL8A_00081500	cysteine repeat modular protein 2, putative	7	7662	0.518	PRELSG_0205100	PF3D7_0718300		10	26	Pfam:PF07699.8(GCC2_GCC3)
PGAL8A_00081600	mitochondrial ribosomal protein S8 precursor,putative	2	390	34.794	PRELSG_0205000	PF3D7_0718400		0		Pfam:PF00410.14(Ribosomal_S8)
PGAL8A_00081700	prefoldin subunit 3, putative	6	570	122.938	PRELSG_0204900	PF3D7_0718500		0		Pfam:PF02996.12(Prefoldin)
PGAL8A_00081800	conserved Plasmodium protein, unknown function	10	4083	23.382	PRELSG_0204800	PF3D7_0718600		0
PGAL8A_00081900	conserved Plasmodium protein, unknown function	1	1365	12.471	PRELSG_0204700	PF3D7_0718700		4
PGAL8A_00082000	conserved Plasmodium protein, unknown function	5	822	1.723	PRELSG_0204600	PF3D7_0718800		2
PGAL8A_00082100	conserved Plasmodium protein, unknown function	2	738	1.62	PRELSG_0204500	PF3D7_0718900	3.2157	2
PGAL8A_00082200	conserved Plasmodium protein, unknown function	1	570	14.67	PRELSG_0204400	PF3D7_0719000		0
PGAL8A_00082300	conserved Plasmodium protein, unknown function	4	540	61.315	PRELSG_0204300	PF3D7_0719100		2
PGAL8A_00082400	NIMA related kinase 4, putative	7	933	72.063	PRELSG_0204200	PF3D7_0719200		0		Pfam:PF00069.20(Pkinase)
PGAL8A_00082500	actin-related protein, putative	1	2622	188.336	PRELSG_0204100	PF3D7_0719300		0		Pfam:PF00022.14(Actin)
PGAL8A_00082600	conserved Plasmodium protein, unknown function	1	3855	32.074	PRELSG_0204000	PF3D7_0719400		1
PGAL8A_00082700	LEM3/CDC50 family protein, putative	2	1656	26.497	PRELSG_0203900	PF3D7_0719500		2		Pfam:PF03381.10(CDC50)
PGAL8A_00082800	60S ribosomal protein L11a, putative	2	522	1711.02	PRELSG_0203800	PF3D7_0719600		0		Pfam:PF00281.14(Ribosomal_L5),Pfam:PF00673.16(Ribosomal_L5_C)
PGAL8A_00082900	40S ribosomal protein S10, putative	3	414	513.961	PRELSG_0203700	PF3D7_0719700		0		Pfam:PF03501.10(S10_plectin)
PGAL8A_00083000	conserved Plasmodium protein, unknown function	1	1353	46.513	PRELSG_0203600	PF3D7_0719800		0	18
PGAL8A_00083100	conserved Plasmodium protein, unknown function	2	7932	37.16	PRELSG_0203500	PF3D7_0719900		4
PGAL8A_00083200	exosome complex component CSL4, putative	2	567	16.288	PRELSG_0203400	PF3D7_0720000		0		Pfam:PF10447.4(EXOSC1),Pfam:PF14382.1(ECR1_N)
PGAL8A_00083300	small subunit rRNA processing protein, putative	1	1005	19.294	PRELSG_0203300	PF3D7_0720100		0		Pfam:PF14259.1(RRM_6)
PGAL8A_00083400	conserved Plasmodium protein, unknown function	2	363	19.287	PRELSG_0203200	PF3D7_0720200		0
PGAL8A_00083500	conserved Plasmodium protein, unknown function	2	318	14.546	PRELSG_0203100	PF3D7_0720300		0
PGAL8A_00083600	ferrodoxin reductase-like protein, putative	2	1911	210.526	PRELSG_0203000	PF3D7_0720400		1		Pfam:PF00070.22(Pyr_redox),Pfam:PF00355.21(Rieske),Pfam:PF07992.9(Pyr_redox_2)
PGAL8A_00083700	conserved Plasmodium protein, unknown function	6	402	24.695	PRELSG_0202900	PF3D7_0720500		2
PGAL8A_00083800	conserved Plasmodium protein, unknown function	7	696	242.493	PRELSG_0202800	PF3D7_0720600		0
PGAL8A_00083900	phosphoinositide-binding protein, putative	6	5271	90.316	PRELSG_0202700	PF3D7_0720700		4		Pfam:PF00787.19(PX)
PGAL8A_00084000	Ham1-like protein, putative	7	591	23.792	PRELSG_0202600	PF3D7_0720800		0		Pfam:PF01725.11(Ham1p_like)
PGAL8A_00084100	conserved Plasmodium protein, unknown function	4	618	41.318	PRELSG_0202500	PF3D7_0720900		0
PGAL8A_00084200	conserved Plasmodium protein, unknown function	2	8178	22.158	PRELSG_0202400	PF3D7_0721000		7
PGAL8A_00084300	conserved Plasmodium protein, unknown function	1	702	1414.82	PRELSG_0202300	PF3D7_0721100	0.379827	0	21
PGAL8A_00084400	conserved Plasmodium protein, unknown function	1	2739	11.264	PRELSG_0202200	PF3D7_0721200		0		Pfam:PF08737.5(Rgp1)
PGAL8A_00084500	ATP-dependent RNA helicase DBP7, putative	1	2376	45.547	PRELSG_0202100	PF3D7_0721300		0		Pfam:PF00270.24(DEAD),Pfam:PF00271.26(Helicase_C),Pfam:PF13959.1(DUF4217)
PGAL8A_00084600	conserved Plasmodium protein, unknown function	6	663	18.272	PRELSG_0202000	PF3D7_0721400		0
PGAL8A_00084700	conserved Plasmodium protein, unknown function	1	2523	27.59	PRELSG_0201900	PF3D7_0721500		7
PGAL8A_00084800	40S ribosomal protein S5, putative	2	585	389.975	PRELSG_0201800	PF3D7_0721600		0		Pfam:PF00177.16(Ribosomal_S7)
PGAL8A_00084900	secreted ookinete protein, putative	1	1392	144.111	PRELSG_0201700	PF3D7_0721700		0	17
PGAL8A_00085000	conserved Plasmodium protein, unknown function	3	324	122.61	PRELSG_0201600	PF3D7_0721800		0
PGAL8A_00085100	V-type ATPase V0 subunit e, putative	3	234	44.509	PRELSG_0201500	PF3D7_0721900		2		Pfam:PF05493.8(ATP_synt_H)
PGAL8A_00085200	conserved Plasmodium protein, unknown function	1	522	16.908	PRELSG_0201400	PF3D7_0722000		0
PGAL8A_00085300	DNA polymerase alpha, putative	3	232	160.923				0
PGAL8A_00085400	meiotic recombination protein DMC1, putative	7	1044	30.177	PRELSG_0507200	PF3D7_0816800		0		Pfam:PF08423.6(Rad51),Pfam:PF14520.1(HHH_5)
PGAL8A_00085500	trafficking protein particle complex subunit2-like protein, putative	4	432	64.534	PRELSG_0507300	PF3D7_0816700		0		Pfam:PF04628.8(Sedlin_N)
PGAL8A_00085600	chaperone protein ClpB1, putative	1	3096	131.44	PRELSG_0507400	PF3D7_0816600		0		Pfam:PF00004.24(AAA),Pfam:PF02861.15(Clp_N),Pfam:PF07724.9(AAA_2),Pfam:PF10431.4(ClpB_D2-small)
PGAL8A_00085700	small heat shock protein HSP20, putative	3	516	21.922	PRELSG_0507500	PF3D7_0816500		0		Pfam:PF00011.16(HSP20)
PGAL8A_00085800	conserved Plasmodium protein, unknown function	3	693	30.047	PRELSG_0507600	PF3D7_0816400		0		Pfam:PF13202.1(EF-hand_5)
PGAL8A_00085900	conserved Plasmodium protein, unknown function	10	3531	9.662	PRELSG_0507700	PF3D7_0816300		2	23	Pfam:PF10699.4(HAP2-GCS1)
PGAL8A_00086000	vacuolar protein sorting-associated protein 2,putative	1	630	6.618	PRELSG_0507800	PF3D7_0816200		0		Pfam:PF03357.16(Snf7)
PGAL8A_00086100	phosphopantothenoylcysteine decarboxylase,putative	4	549	21.021	PRELSG_0507900	PF3D7_0816100		0		Pfam:PF02441.14(Flavoprotein)
PGAL8A_00086200	ribosome assembly protein RRB1, putative	1	1320	13.772	PRELSG_0508000	PF3D7_0816000		0		Pfam:PF00400.27(WD40),Pfam:PF12265.3(CAF1C_H4-bd)
PGAL8A_00086300	dihydrolipoyl dehydrogenase, apicoplast,putative	1	1950	96.523	PRELSG_0508100	PF3D7_0815900		1		Pfam:PF00070.22(Pyr_redox),Pfam:PF02852.17(Pyr_redox_dim),Pfam:PF07992.9(Pyr_redox_2)
PGAL8A_00086400	vacuolar protein sorting-associated protein 9,putative	1	4434	80.022	PRELSG_0508200	PF3D7_0815800		0		Pfam:PF02204.13(VPS9)
PGAL8A_00086500	ubiquitin, putative	2	1044	13.405	PRELSG_0508300	PF3D7_0815700		2		Pfam:PF00240.18(ubiquitin)
PGAL8A_00086600	eukaryotic translation initiation factor 3subunit G, putative	10	807	152.582	PRELSG_0508400	PF3D7_0815600		0		Pfam:PF00076.17(RRM_1),Pfam:PF12353.3(eIF3g)
PGAL8A_00086700	conserved Plasmodium protein, unknown function	5	1581	178.898	PRELSG_0508500	PF3D7_0815500		0
PGAL8A_00086800	conserved Plasmodium protein, unknown function	2	453	37.231	PRELSG_0508600	PF3D7_0815400		0
PGAL8A_00086900	phosphoglucomutase-2, putative	1	891	269.782	PRELSG_0508700	PF3D7_0413500		1		Pfam:PF00300.17(His_Phos_1)
PGAL8A_00087000	26S protease regulatory subunit 6B, putative	2	1179	137.76	PRELSG_0508800	PF3D7_0413600		0		Pfam:PF00004.24(AAA)
PGAL8A_00087100	lysine decarboxylase-like protein, putative	1	1005	18.222	PRELSG_0508900	PF3D7_0413700		1		Pfam:PF03641.9(Lysine_decarbox)
PGAL8A_00087200	50S ribosomal protein L10, putative	1	822	50.902	PRELSG_0509000	PF3D7_0413800		0		Pfam:PF00466.15(Ribosomal_L10)
PGAL8A_00087300	ubiquitin carboxyl-terminal hydrolase 13,putative	4	2544	57.115	PRELSG_0509100	PF3D7_0413900		0		Pfam:PF00443.24(UCH),Pfam:PF02148.14(zf-UBP)
PGAL8A_00087400	structural maintenance of chromosomes protein 3,putative	21	3582	124.986	PRELSG_0509200	PF3D7_0414000		0		Pfam:PF02463.14(SMC_N),Pfam:PF06470.8(SMC_hinge),Pfam:PF13304.1(AAA_21)
PGAL8A_00087500	conserved Plasmodium protein, unknown function	4	4332	10.361	PRELSG_0509300	PF3D7_0414100		4	24
PGAL8A_00087600	calmodulin-like protein, putative	5	453	46.313	PRELSG_0509400			0
PGAL8A_00087700	Rab5-interacting protein, putative	4	333	15.568	PRELSG_0509500	PF3D7_0414300		3		Pfam:PF07019.7(Rab5ip)
PGAL8A_00087800	conserved Plasmodium protein, unknown function	3	1041	6.468	PRELSG_0509600	PF3D7_0414400		0
PGAL8A_00087900	RNA-binding protein, putative	8	1083	50.286	PRELSG_0509700	PF3D7_0414500		0		Pfam:PF00076.17(RRM_1)
PGAL8A_00088000	conserved protein, unknown function	2	717	23.336	PRELSG_0509800	PF3D7_0414600		0
PGAL8A_00088100	GTP-binding protein, putative	1	1788	25.865	PRELSG_0509900	PF3D7_0414700		0		Pfam:PF06858.9(NOG1)
PGAL8A_00088200	conserved Plasmodium protein, unknown function	1	1035	1.079	PRELSG_0510000	PF3D7_0414800		0		Pfam:PF12314.3(IMCp)
PGAL8A_00088300	armadillo-domain containing rhoptry protein,putative	11	828	88.593	PRELSG_0510100	PF3D7_0414900		0
PGAL8A_00088400	arsenical pump-driving ATPase, putative	1	1131	133.66	PRELSG_0510200	PF3D7_0415000		0		Pfam:PF02374.10(ArsA_ATPase)
PGAL8A_00088500	conserved Plasmodium protein, unknown function	1	1026	11.018	PRELSG_0510300	PF3D7_0415100		0		Pfam:PF10354.4(DUF2431)
PGAL8A_00088600	conserved Plasmodium protein, unknown function	1	4374	17.021	PRELSG_0510400	PF3D7_0415200		1
PGAL8A_00088700	cdc2-related protein kinase 3, putative	2	4308	64.582	PRELSG_0510500	PF3D7_0415300		0		Pfam:PF00069.20(Pkinase)
PGAL8A_00088800	coatomer subunit zeta, putative	1	627	22.934	PRELSG_0510600	PF3D7_0415400		0		Pfam:PF01217.15(Clat_adaptor_s)
PGAL8A_00088900	nuclear cap-binding protein subunit 2, putative	2	687	77.497	PRELSG_0510700	PF3D7_0415500		0		Pfam:PF00076.17(RRM_1)
PGAL8A_00089000	GTP:AMP phosphotransferase, putative	1	669	64.166	PRELSG_0510800	PF3D7_0415600		0		Pfam:PF00406.17(ADK)
PGAL8A_00089100	conserved Plasmodium protein, unknown function	1	1233	11.784	PRELSG_0510900	PF3D7_0415700		0
PGAL8A_00089200	RING zinc finger protein, putative	1	2166	13.939	PRELSG_0511000	PF3D7_0415800		0		Pfam:PF13639.1(zf-RING_2)
PGAL8A_00089300	60S ribosomal protein L15, putative	2	618	335.114	PRELSG_0511100	PF3D7_0415900		0		Pfam:PF00827.12(Ribosomal_L15e)
PGAL8A_00089400	RNA-binding protein, putative	7	1416	56.049	PRELSG_0511200	PF3D7_0416000		0		Pfam:PF00076.17(RRM_1)
PGAL8A_00089500	hypothetical protein	1	2784	2.292	PRELSG_0511300			0
PGAL8A_00089600	glutamyl-tRNA(Gln) amidotransferase subunit A,putative	1	1926	9.517	PRELSG_0511400	PF3D7_0416100		0	19	Pfam:PF01425.16(Amidase)
PGAL8A_00089700	conserved protein, unknown function	1	621	42.486	PRELSG_0511500	PF3D7_0416200		0		Pfam:PF06658.7(DUF1168)
PGAL8A_00089800	DNA helicase MCM9, putative	1	3315	9.017	PRELSG_0511600	PF3D7_0416300		0		Pfam:PF00493.18(MCM)
PGAL8A_00089900	histone acetyltransferase, putative	4	3096	86.351	PRELSG_0511700	PF3D7_0416400		0		Pfam:PF10394.4(Hat1_N)
PGAL8A_00090000	repressor of RNA polymerase III transcriptionMAF1, putative	1	657	9.004	PRELSG_0511800	PF3D7_0416500		0		Pfam:PF09174.5(Maf1)
PGAL8A_00090100	prohibitin-like protein, putative	1	885	39.83				0
PGAL8A_00090200	CDGSH iron-sulfur domain-containing protein,putative	1	267	18.208	PRELSG_0512000	PF3D7_0416700		0		Pfam:PF09360.5(zf-CDGSH)
PGAL8A_00090300	small GTP-binding protein sar1, putative	3	579	121.516	PRELSG_0512100	PF3D7_0416800		0		Pfam:PF00025.16(Arf)
PGAL8A_00090400	conserved Plasmodium protein, unknown function	2	6588	24.73	PRELSG_0512200	PF3D7_0416900		0
PGAL8A_00090500	conserved Plasmodium protein, unknown function	3	1800	25.981	PRELSG_0512300	PF3D7_0417000		0	20
PGAL8A_00090600	mRNA-binding protein PUF2, putative	4	1302	2.06	PRELSG_0512400	PF3D7_0417100		0		Pfam:PF00806.14(PUF)
PGAL8A_00090700	bifunctional dihydrofolate reductase-thymidylatesynthase, putative	1	1770	72.567	PRELSG_0512500	PF3D7_0417200		0		Pfam:PF00186.14(DHFR_1),Pfam:PF00303.14(Thymidylat_synt)
PGAL8A_00090800	LETM1-like protein, putative	4	2190	56.207	PRELSG_0512600	PF3D7_0417300		1		Pfam:PF07766.8(LETM1)
PGAL8A_00090900	conserved Plasmodium protein, unknown function	1	14505	32.55				2	18
PGAL8A_00091000	memo-like protein	9	687	35.233	PRELSG_0512800	PF3D7_0417500		0
PGAL8A_00091100	conserved Plasmodium protein, unknown function	4	2928	5.26	PRELSG_0512900	PF3D7_0417600		0
PGAL8A_00091200	conserved Plasmodium protein, unknown function	6	1584	2.528	PRELSG_0513000	PF3D7_0417700		0
PGAL8A_00091300	cdc2-related protein kinase 1, putative	1	2532	34.424	PRELSG_0513100	PF3D7_0417800		0		Pfam:PF00069.20(Pkinase)
PGAL8A_00091400	conserved Plasmodium protein, unknown function	1	2271	13.024	PRELSG_0513200	PF3D7_0417900		0
PGAL8A_00091500	conserved Plasmodium protein, unknown function	10	12660	23.065	PRELSG_0513300	PF3D7_0418000		2
PGAL8A_00091600	conserved Plasmodium protein, unknown function	1	3450	22.788	PRELSG_0513400	PF3D7_0418100		0
PGAL8A_00091700	eukaryotic translation initiation factor 3subunit M, putative	1	1290	201.381	PRELSG_0513500	PF3D7_0418200		0		Pfam:PF01399.22(PCI)
PGAL8A_00091800	conserved Plasmodium protein, unknown function	1	1764	219.458	PRELSG_0513600	PF3D7_0418300		0
PGAL8A_00091900	conserved Plasmodium protein, unknown function	3	333	8.41	PRELSG_0513700	PF3D7_0418400		0
PGAL8A_00092000	trafficking protein particle complex subunit 3,putative	6	564	72.067	PRELSG_0513800	PF3D7_0418500		0		Pfam:PF04051.11(TRAPP)
PGAL8A_00092100	regulator of chromosome condensation, putative	1	4065	4.681	PRELSG_0513900	PF3D7_0418600		0
PGAL8A_00092200	RNA-binding protein NOB1, putative	1	1698	31.887	PRELSG_0514000	PF3D7_0418700		0		Pfam:PF08772.6(NOB1_Zn_bind)
PGAL8A_00092300	conserved Plasmodium protein, unknown function	9	804	13.424	PRELSG_0514100	PF3D7_0418800		2	23	Pfam:PF04536.9(TPM)
PGAL8A_00092400	conserved Plasmodium protein, unknown function	5	1128	9.394	PRELSG_0514200	PF3D7_0418900		0
PGAL8A_00092500	conserved Plasmodium protein, unknown function	10	1332	8.457	PRELSG_0514300	PF3D7_0419000		0
PGAL8A_00092600	conserved Plasmodium protein, unknown function	2	747	8.509	PRELSG_0514400	PF3D7_0419100		0
PGAL8A_00092700	protein transport protein GOT1, putative	1	411	14.393	PRELSG_0514500	PF3D7_0419200		4		Pfam:PF04178.7(Got1)
PGAL8A_00092800	conserved Plasmodium protein, unknown function	2	969	18.712	PRELSG_0514600	PF3D7_0419300		0
PGAL8A_00092900	conserved Plasmodium protein, unknown function	4	6189	12.834	PRELSG_0514700	PF3D7_0419400		1	23
PGAL8A_00093000	conserved Plasmodium membrane protein, unknownfunction	1	1374	7.649	PRELSG_0514800	PF3D7_0419500		5
PGAL8A_00093100	ran binding protein 1, putative	2	873	653.79	PRELSG_0514900	PF3D7_0419600		0		Pfam:PF00638.13(Ran_BP1)
PGAL8A_00093200	apical merozoite protein, putative	1	855	141.541	PRELSG_0515000	PF3D7_0419700	4.93113	2	23
PGAL8A_00093300	60S ribosomal protein L7ae/L30e, putative	1	666	18.851	PRELSG_0515100	PF3D7_0419800		0		Pfam:PF01248.21(Ribosomal_L7Ae)
PGAL8A_00093400	phosphatidylinositol 4-kinase, putative	6	13173	38.09	PRELSG_0515200	PF3D7_0419900		21
PGAL8A_00093500	zinc finger protein, putative	2	9825	96.423	PRELSG_0515300	PF3D7_0420000		0		Pfam:PF07496.10(zf-CW)
PGAL8A_00093600	serine/threonine protein kinase RIO2, putative	1	2163	96.18	PRELSG_0515400	PF3D7_0420100		0		Pfam:PF01163.17(RIO1),Pfam:PF09202.6(Rio2_N)
PGAL8A_00093700	conserved Plasmodium protein, unknown function	1	4119	7.964	PRELSG_0515500			0		Pfam:PF01494.14(FAD_binding_3)
PGAL8A_00093800	holo-[acyl-carrier-protein] synthase, putative	1	1566	39.588	PRELSG_0515600	PF3D7_0420200		0		Pfam:PF01648.15(ACPS),Pfam:PF02130.12(UPF0054)
PGAL8A_00093900	transcription factor with AP2 domain(s),putative	1	7902	138.721	PRELSG_0515700	PF3D7_0420300		0		Pfam:PF00847.15(AP2)
PGAL8A_00094000	ribosome-recycling factor, putative	1	783	26.312	PRELSG_0515800	PF3D7_0420400		0		Pfam:PF01765.14(RRF)
PGAL8A_00094100	conserved Plasmodium protein, unknown function	1	561	14.289				0
PGAL8A_00094400	conserved Plasmodium protein, unknown function	1	8274	63.751	PRELSG_0218900	PF3D7_0730500		0
PGAL8A_00094500	conserved Plasmodium protein, unknown function	3	483	24.137	PRELSG_0218800	PF3D7_0730400		0
PGAL8A_00094600	transcription factor with AP2 domain(s),putative	1	4437	38.162	PRELSG_0218700	PF3D7_0730300		0		Pfam:PF00847.15(AP2),Pfam:PF14733.1(ACDC)
PGAL8A_00094700	AP-4 complex subunit beta, putative	4	2565	26.25	PRELSG_0218600	PF3D7_0730200		0		Pfam:PF01602.15(Adaptin_N),Pfam:PF09066.5(B2-adapt-app_C)
PGAL8A_00094800	tRNA pseudouridine synthase D, putative	1	2565	6.134	PRELSG_0218500	PF3D7_0730100		0		Pfam:PF01142.13(TruD)
PGAL8A_00094900	conserved Plasmodium protein, unknown function	2	330	17.878	PRELSG_0218400	PF3D7_0730000		1
PGAL8A_00095000	dynein heavy chain, putative	2	14730	12.35	PRELSG_0218300	PF3D7_0729900		0		Pfam:PF03028.10(Dynein_heavy),Pfam:PF07728.9(AAA_5),Pfam:PF08385.7(DHC_N1),Pfam:PF08393.8(DHC_N2),Pfam:PF12774.2(AAA_6),Pfam:PF12775.2(AAA_7),Pfam:PF12777.2(MT),Pfam:PF12780.2(AAA_8),Pfam:PF12781.2(AAA_9)
PGAL8A_00095100	dynein light chain, putative	1	294	1.151	PRELSG_0218200	PF3D7_0729800		0		Pfam:PF01221.13(Dynein_light)
PGAL8A_00095200	conserved Plasmodium protein, unknown function	2	2346	6.743	PRELSG_0218100	PF3D7_0729700		0
PGAL8A_00095300	conserved Plasmodium protein, unknown function	5	492	64.243	PRELSG_0218000	PF3D7_0729600		0		Pfam:PF08583.5(Cmc1)
PGAL8A_00095400	mRNA (N6-adenosine)-methyltransferase, putative	1	2298	19.697	PRELSG_0217900	PF3D7_0729500		0		Pfam:PF05063.9(MT-A70)
PGAL8A_00095500	ribosome biogenesis protein BRX1 homolog,putative	1	1287	29.589	PRELSG_0217800	PF3D7_0729400		0		Pfam:PF04427.13(Brix)
PGAL8A_00095600	60S ribosomal export protein NMD3, putative	1	2259	19.455	PRELSG_0217700	PF3D7_0729300		0		Pfam:PF04981.8(NMD3)
PGAL8A_00095700	1-cys peroxiredoxin, putative	2	714	4.715	PRELSG_0217600	PF3D7_0729200		0	19	Pfam:PF08534.5(Redoxin)
PGAL8A_00095800	conserved Plasmodium protein, unknown function	1	7446	56.332	PRELSG_0217500	PF3D7_0729100		0		Pfam:PF03561.10(Allantoicase)
PGAL8A_00095900	signal recognition particle SRP9, putative	4	300	27.192	PRELSG_0217400	PF3D7_0729000		0		Pfam:PF05486.7(SRP9-21)
PGAL8A_00096000	RNA-binding protein, putative	8	1506	43.224	PRELSG_0217300	PF3D7_0728900		0		Pfam:PF00076.17(RRM_1),Pfam:PF14237.1(DUF4339)
PGAL8A_00096100	conserved Plasmodium protein, unknown function	2	1149	32.363	PRELSG_0217200	PF3D7_0728800		0	25
PGAL8A_00096200	alpha/beta hydrolase, putative	4	2466	1.991	PRELSG_0217100	PF3D7_0728700		0		Pfam:PF12695.2(Abhydrolase_5)
PGAL8A_00096300	zinc finger, C3HC4 type, putative	5	5592	48.61	PRELSG_0217000	PF3D7_0728600		0		Pfam:PF13445.1(zf-RING_UBOX)
PGAL8A_00096400	conserved Plasmodium protein, unknown function	5	390	10.307	PRELSG_0216900	PF3D7_0728500		0
PGAL8A_00096500	conserved Plasmodium protein, unknown function	2	378	28.24	PRELSG_0216800			0		Pfam:PF03937.11(Sdh5)
PGAL8A_00096600	conserved Plasmodium protein, unknown function	1	645	194.271	PRELSG_0216700	PF3D7_0728300		0
PGAL8A_00096700	actin-like protein, putative	2	1515	8.536	PRELSG_0216600	PF3D7_0728200		0		Pfam:PF00022.14(Actin)
PGAL8A_00096800	conserved Plasmodium protein, unknown function	1	13479	34.956	PRELSG_0216500	PF3D7_0728100		2
PGAL8A_00096900	eukaryotic translation initiation factor 2subunit alpha, putative	2	999	449.388	PRELSG_0216400	PF3D7_0728000		0		Pfam:PF00575.18(S1),Pfam:PF07541.7(EIF_2_alpha)
PGAL8A_00097000	conserved Plasmodium protein, unknown function	1	5547	27.108	PRELSG_0216300	PF3D7_0727900		3
PGAL8A_00097100	cation transporting ATPase, putative	1	4833	44.658	PRELSG_0216200	PF3D7_0727800		12		Pfam:PF00122.15(E1-E2_ATPase),Pfam:PF12710.2(HAD)
PGAL8A_00097200	conserved Plasmodium protein, unknown function	1	2244	12.455	PRELSG_0216100	PF3D7_0727700		0
PGAL8A_00097300	conserved Plasmodium protein, unknown function	3	2901	12.265	PRELSG_0216000	PF3D7_0727600		0
PGAL8A_00097400	conserved Plasmodium protein, unknown function	1	2040	73.274	PRELSG_0215900	PF3D7_0727500		1		Pfam:PF02536.9(mTERF)
PGAL8A_00097500	proteasome subunit alpha type-5, putative	3	771	252.543	PRELSG_0215800	PF3D7_0727400		0		Pfam:PF00227.21(Proteasome),Pfam:PF10584.4(Proteasome_A_N)
PGAL8A_00097600	DNA (cytosine-5)-methyltransferase, putative	1	2217	22.397	PRELSG_0215700	PF3D7_0727300		0
PGAL8A_00097700	cysteine desulfurase, putative	1	1575	43.777	PRELSG_0215600	PF3D7_0727200		0		Pfam:PF00266.14(Aminotran_5)
PGAL8A_00097800	conserved Plasmodium protein, unknown function	1	2595	39.214		PF3D7_0727100		1
PGAL8A_00097900	vacuolar protein sorting-associated protein 53,putative	1	2877	24.748	PRELSG_0215300	PF3D7_0727000		0		Pfam:PF04100.7(Vps53_N)
PGAL8A_00098000	mitochondrial import inner membrane translocasesubunit TIM50, putative	1	1377	69.598	PRELSG_0215200	PF3D7_0726900		1		Pfam:PF03031.13(NIF)
PGAL8A_00098100	dolichyl-diphosphooligosaccharide--proteinglycosyltransferase subunit DAD1, putative	3	324	66.695	PRELSG_0215100	PF3D7_0726800		3		Pfam:PF02109.11(DAD)
PGAL8A_00098200	conserved Plasmodium protein, unknown function	1	501	98.464	PRELSG_0215000	PF3D7_0726700	1.07079	1	18
PGAL8A_00098300	conserved Plasmodium protein, unknown function	2	1947	35.284	PRELSG_0214900	PF3D7_0726600		0
PGAL8A_00098400	ubiquitin carboxyl-terminal hydrolase, putative	4	8520	218.934	PRELSG_0214800	PF3D7_0726500		0		Pfam:PF00443.24(UCH)
PGAL8A_00098500	conserved Plasmodium protein, unknown function	4	12543	19.399	PRELSG_0214700	PF3D7_0726400		4
PGAL8A_00098600	DNA mismatch repair protein PMS1, putative	2	3798	63.091	PRELSG_0214600	PF3D7_0726300		0		Pfam:PF01119.14(DNA_mis_repair),Pfam:PF08676.6(MutL_C),Pfam:PF13589.1(HATPase_c_3)
PGAL8A_00098700	conserved Plasmodium protein, unknown function	1	1449	2.562	PRELSG_0214500	PF3D7_0102800		3		Pfam:PF06775.9(Seipin)
PGAL8A_00098800	aspartate--tRNA ligase, putative	1	1833	171.122	PRELSG_0214400	PF3D7_0102900		0		Pfam:PF00152.15(tRNA-synt_2),Pfam:PF01336.20(tRNA_anti-codon)
PGAL8A_00098900	vacuolar protein sorting-associated protein VTA1,putative	7	783	50.765	PRELSG_0214300	PF3D7_0103000		0		Pfam:PF04652.11(DUF605)
PGAL8A_00099000	vacuolar protein sorting-associated protein 51,putative	1	4359	42.388	PRELSG_0214200	PF3D7_0103100		2		Pfam:PF08700.6(Vps51)
PGAL8A_00099100	AN1-like zinc finger, putative	2	1020	14.786	PRELSG_0214100			0		Pfam:PF01428.11(zf-AN1)
PGAL8A_00099200	nucleoside transporter 4, putative	2	1356	25.055	PRELSG_0214000	PF3D7_0103200		11
PGAL8A_00099300	conserved Plasmodium protein, unknown function	1	2205	28.901	PRELSG_0213900	PF3D7_0103300		0
PGAL8A_00099400	zinc-carboxypeptidase, putative	1	5841	66.289	PRELSG_0213800	PF3D7_0103400		0		Pfam:PF00246.19(Peptidase_M14)
PGAL8A_00099500	conserved Plasmodium protein, unknown function	7	5037	7.706	PRELSG_0213700	PF3D7_0103500		5
PGAL8A_00099600	ATP-dependent RNA helicase, putative	3	3906	16.881	PRELSG_0213600	PF3D7_0103600		1		Pfam:PF00270.24(DEAD),Pfam:PF00271.26(Helicase_C)
PGAL8A_00099700	L-seryl-tRNA(Sec) kinase, putative	6	1524	8.908	PRELSG_0213500	PF3D7_0103700		0
PGAL8A_00099800	actin-related protein	9	1017	18.169	PRELSG_0213400	PF3D7_0103800		0		Pfam:PF00022.14(Actin)
PGAL8A_00099900	parasite-infected erythrocyte surface protein,putative	1	1476	112.619	PRELSG_0213300	PF3D7_0103900		1	22
PGAL8A_00100000	thrombospondin-related sporozoite protein,putative	3	489	1.046	PRELSG_0213200	PF3D7_0104000	1.5491	1	25	Pfam:PF00090.14(TSP_1)
PGAL8A_00100100	hypothetical protein	2	1371	3.741	PRELSG_0213100			0
PGAL8A_00100200	conserved Plasmodium protein, unknown function	2	2361	3.848	PRELSG_0213000	PF3D7_0104100		5
PGAL8A_00100300	StAR-related lipid transfer protein, putative	1	1524	43.529	PRELSG_0212900	PF3D7_0104200		0	23
PGAL8A_00100400	ubiquitin carboxyl-terminal hydrolase 1,putative	3	8514	33.629	PRELSG_0212800	PF3D7_0104300		0
PGAL8A_00100500	4-hydroxy-3-methylbut-2-enyl diphosphatereductase, putative	1	1437	51.491	PRELSG_0212700	PF3D7_0104400		0		Pfam:PF02401.13(LYTB)
PGAL8A_00100600	conserved protein, unknown function	1	795	55.045	PRELSG_0212600	PF3D7_0104500		1		Pfam:PF11539.3(DUF3228)
PGAL8A_00100700	conserved Plasmodium protein, unknown function	1	3531	3.487	PRELSG_0212500	PF3D7_0104600		0
PGAL8A_00100800	major facilitator superfamily-relatedtransporter, putative	1	1800	9.859	PRELSG_0212400	PF3D7_0104700		12
PGAL8A_00100900	novel putative transporter 1, putative	1	1590	33.559	PRELSG_0212300	PF3D7_0104800		12		Pfam:PF07690.11(MFS_1)
PGAL8A_00101000	conserved Plasmodium protein, unknown function	1	429	21.069	PRELSG_0212100	PF3D7_0105100		0
PGAL8A_00101100	hypothetical protein	2	1365	4.651	PRELSG_0212000			0
PGAL8A_00101200	hypothetical protein	1	6393	15.847	PRELSG_0211900			8
PGAL8A_00101300	RAP protein, putative	1	1692	77.753	PRELSG_0211800	PF3D7_0105200		0		Pfam:PF08373.5(RAP)
PGAL8A_00101400	cyclase-associated protein, putative	2	765	34.582	PRELSG_0211700	PF3D7_0105300		0		Pfam:PF08603.6(CAP_C)
PGAL8A_00101500	conserved Plasmodium protein, unknown function	2	411	25.686	PRELSG_0211600	PF3D7_0105400		2	20
PGAL8A_00101600	conserved Plasmodium protein, unknown function	1	1002	18.072	PRELSG_0211500	PF3D7_0105500		0
PGAL8A_00101700	conserved Plasmodium protein, unknown function	3	3195	54.418	PRELSG_0211400	PF3D7_0105600		2
PGAL8A_00101800	asparagine-rich antigen, putative	1	6852	8.155	PRELSG_0211300			0
PGAL8A_00101900	conserved Plasmodium protein, unknown function	1	2313	113.008	PRELSG_0211200	PF3D7_0105800		0		Pfam:PF01111.14(CKS)
PGAL8A_00102000	DNA binding protein, putative	1	1314	24.803	PRELSG_0211100	PF3D7_0105900		0		Pfam:PF01612.15(DNA_pol_A_exo1)
PGAL8A_00102100	conserved Plasmodium protein, unknown function	1	2208	85.911	PRELSG_0211000	PF3D7_0106000		0
PGAL8A_00102200	V-type proton ATPase subunit C, putative	1	1152	27.615	PRELSG_0210900	PF3D7_0106100		0		Pfam:PF03223.10(V-ATPase_C)
PGAL8A_00102300	conserved Plasmodium protein, unknown function	2	636	8.287	PRELSG_0210800	PF3D7_0106200		0
PGAL8A_00102400	calcium-transporting ATPase, putative	3	3390	87.306	PRELSG_0210700	PF3D7_0106300		8		Pfam:PF00122.15(E1-E2_ATPase),Pfam:PF00689.16(Cation_ATPase_C),Pfam:PF00690.21(Cation_ATPase_N),Pfam:PF00702.21(Hydrolase)
PGAL8A_00102500	pre-rRNA-processing protein TSR2, putative	4	447	37.608	PRELSG_0210600	PF3D7_0106400		0		Pfam:PF10273.4(WGG)
PGAL8A_00102600	conserved Plasmodium protein, unknown function	1	3684	38.564	PRELSG_0210500	PF3D7_0106500		0
PGAL8A_00102700	conserved Plasmodium protein, unknown function	1	918	39.572	PRELSG_0210400	PF3D7_0106600		0
PGAL8A_00102800	small ribosomal subunit assembling AARP2 protein,putative	1	3792	46.717	PRELSG_0210300	PF3D7_0106700		0		Pfam:PF00009.22(GTP_EFTU),Pfam:PF04950.7(DUF663),Pfam:PF08142.7(AARP2CN)
PGAL8A_00102900	ras-related protein Rab-5C, putative	7	453	22.002	PRELSG_0210200	PF3D7_0106800		0		Pfam:PF00071.17(Ras)
PGAL8A_00103000	2-C-methyl-D-erythritol 4-phosphatecytidylyltransferase, putative	1	1896	17.426	PRELSG_0210100	PF3D7_0106900		0	22	Pfam:PF01128.14(IspD)
PGAL8A_00103100	centrin-1, putative	6	486	58.215	PRELSG_0210000	PF3D7_0107000		0		Pfam:PF13499.1(EF-hand_7),Pfam:PF13833.1(EF-hand_8)
PGAL8A_00103200	conserved Plasmodium protein, unknown function	1	1320	10.512	PRELSG_0209900	PF3D7_0107100		0
PGAL8A_00103300	carbon catabolite repressor protein 4, putative	8	756	8.636	PRELSG_0209800	PF3D7_0107200		0
PGAL8A_00103400	hypothetical protein	2	1725	0.602	PRELSG_0209700	PF3D7_0107300		2
PGAL8A_00103500	conserved Plasmodium protein, unknown function	1	456	55.1	PRELSG_0209600	PF3D7_0107400		1
PGAL8A_00103600	lipid/sterol:H+ symporter, putative	4	3960	73.603	PRELSG_0209500	PF3D7_0107500		11		Pfam:PF02460.13(Patched)
PGAL8A_00103700	hypothetical protein	1	3504	3.538	PRELSG_0209400			5
PGAL8A_00103800	serine/threonine protein kinase, putative	1	10923	10.962	PRELSG_0209300	PF3D7_0107600		2		Pfam:PF07714.12(Pkinase_Tyr)
PGAL8A_00103900	conserved Plasmodium membrane protein, unknownfunction	1	1212	3.576	PRELSG_0209200	PF3D7_0107700		5		Pfam:PF04756.8(OST3_OST6)
PGAL8A_00104000	double-strand break repair protein MRE11,putative	1	3426	35.229	PRELSG_0209100	PF3D7_0107800		0		Pfam:PF00149.23(Metallophos),Pfam:PF04152.9(Mre11_DNA_bind)
PGAL8A_00104100	conserved Plasmodium protein, unknown function	1	666	5.516	PRELSG_0209000	PF3D7_0107900		0	17
PGAL8A_00104200	proteasome subunit beta type-3, putative	4	657	218.621	PRELSG_0208900	PF3D7_0108000		0		Pfam:PF00227.21(Proteasome)
PGAL8A_00104300	conserved Plasmodium protein, unknown function	1	1899	19.2	PRELSG_0208800	PF3D7_0108100		0
PGAL8A_00104400	conserved Plasmodium protein, unknown function	1	6201	178.432	PRELSG_0208700	PF3D7_0108300		0
PGAL8A_00104500	mitochondrial carrier protein, putative	9	924	23.22	PRELSG_0208600	PF3D7_0108400		4		Pfam:PF00153.22(Mito_carr)
PGAL8A_00104600	conserved Plasmodium protein, unknown function	1	597	179.927	PRELSG_0208500	PF3D7_0108500		0
PGAL8A_00104700	conserved Plasmodium protein, unknown function	6	894	39.57	PRELSG_0208400	PF3D7_0108600		1		Pfam:PF00226.26(DnaJ)
PGAL8A_00104800	conserved Plasmodium protein, unknown function	9	999	21.611	PRELSG_0208200	PF3D7_0108800		3
PGAL8A_00104900	photosensitized INA-labeled protein PHIL1,putative	1	669	212.771	PRELSG_0208100	PF3D7_0109000		0
PGAL8A_00105000	LCCL domain-containing protein, putative	2	2970	17.547	PRELSG_0208000	PF3D7_0109100		0		Pfam:PF03815.14(LCCL),Pfam:PF07691.7(PA14)
PGAL8A_00105100	cleavage and polyadenylation specificity factorsubunit 5, putative	1	696	28.403	PRELSG_0207900	PF3D7_0109200		0		Pfam:PF13869.1(NUDIX_2)
PGAL8A_00105200	fatty acid elongation protein, GNS1/SUR4 family,putative	2	963	9.124	PRELSG_0207800	PF3D7_0109300		0		Pfam:PF01151.13(ELO)
PGAL8A_00105300	tubulin-specific chaperone a, putative	2	498	55.302	PRELSG_0207700	PF3D7_0109400		0		Pfam:PF02970.11(TBCA)
PGAL8A_00105400	N-acetyltransferase, putative	2	468	29.146	PRELSG_0207600	PF3D7_0109500		0		Pfam:PF08445.5(FR47)
PGAL8A_00105500	cold-shock protein, putative	3	423	15.101	PRELSG_0207500	PF3D7_0109600		0		Pfam:PF00313.17(CSD)
PGAL8A_00105600	conserved protein, unknown function	2	564	14.282	PRELSG_0207400	PF3D7_0109700		0		Pfam:PF06102.7(DUF947)
PGAL8A_00105700	phenylalanine--tRNA ligase alpha subunit,putative	1	1632	60.772	PRELSG_0207300	PF3D7_0109800		0		Pfam:PF01409.15(tRNA-synt_2d)
PGAL8A_00105750	phosphatidate cytidylyltransferase, putative	13	1782		PRELSG_0207250	PF3D7_0109850
PGAL8A_00105850	conserved Plasmodium protein, unknown function	6	501		PRELSG_0207150	PF3D7_0109950
PGAL8A_00105900	conserved Plasmodium protein, unknown function	1	624	20.687	PRELSG_0207100	PF3D7_0110000		1
PGAL8A_00106000	selenocysteine-specific elongation factor selB,putative	1	2085	27.663	PRELSG_0207000	PF3D7_0110100		0		Pfam:PF00009.22(GTP_EFTU),Pfam:PF03144.20(GTP_EFTU_D2)
PGAL8A_00106100	FAD-linked sulfhydryl oxidase ERV1, putative	1	417	25.712	PRELSG_0206900	PF3D7_0110200		0		Pfam:PF04777.8(Evr1_Alr)
PGAL8A_00106200	DNA-directed RNA polymerase II subunit RPB9,putative	2	687	32.966	PRELSG_0206800	PF3D7_0110400		0		Pfam:PF01096.13(TFIIS_C),Pfam:PF02150.11(RNA_POL_M_15KD)
PGAL8A_00106300	bromodomain protein, putative	2	5196	61.504	PRELSG_0206700	PF3D7_0110500		0		Pfam:PF00439.20(Bromodomain)
PGAL8A_00106400	phosphatidylinositol-4-phosphate 5-kinase,putative	7	4332	71.47	PRELSG_0206600	PF3D7_0110600		0		Pfam:PF01504.13(PIP5K)
PGAL8A_00106500	chromatin assembly factor 1 protein WD40 domain,putative	1	1341	391.98	PRELSG_0206500	PF3D7_0110700		0		Pfam:PF00400.27(WD40),Pfam:PF12265.3(CAF1C_H4-bd)
PGAL8A_00106600	transcription initiation factor TFIIB, putative	3	1101	104.879	PRELSG_0206400	PF3D7_0110800		0		Pfam:PF00382.14(TFIIB),Pfam:PF08271.7(TF_Zn_Ribbon)
PGAL8A_00106700	adenylate kinase-like protein 1	1	564	53.322	PRELSG_0206300	PF3D7_0110900		0		Pfam:PF13238.1(AAA_18)
PGAL8A_00106800	kinesin-8, putative	5	4149	250.936	PRELSG_0206200	PF3D7_0111000		0		Pfam:PF00225.18(Kinesin)
PGAL8A_00106900	conserved Plasmodium protein, unknown function	3	294	8.188	PRELSG_0206100	PF3D7_0111200		0
PGAL8A_00107000	replication factor c protein, putative	1	3204	28.102	PRELSG_0206000	PF3D7_0111300		0		Pfam:PF00004.24(AAA)
PGAL8A_00107100	conserved Plasmodium protein, unknown function	1	1632	46.977	PRELSG_0205900	PF3D7_0111400		0
PGAL8A_00107200	UMP-CMP kinase, putative	5	1056	58.142	PRELSG_0205800	PF3D7_0111500		0		Pfam:PF00406.17(ADK)
PGAL8A_00107300	conserved Plasmodium protein, unknown function	1	708	11.844	PRELSG_0205700	PF3D7_0111600		0
PGAL8A_00107400	conserved Plasmodium protein, unknown function	1	351	11.632	PRELSG_0205600	PF3D7_0111700		0
PGAL8A_00107500	eukaryotic translation initiation factor 4E,putative	8	1674	34.997	PRELSG_0205500	PF3D7_0111800		0		Pfam:PF01652.13(IF4E)
PGAL8A_00107600	conserved protein, unknown function	3	246	36.199	PRELSG_0205400	PF3D7_0111900		0		Pfam:PF05254.7(UPF0203)
PGAL8A_00107700	TatD-like deoxyribonuclease, putative	5	1365	45.896	PRELSG_0205300	PF3D7_0112000		1		Pfam:PF01026.16(TatD_DNase)
PGAL8A_00107800	conserved Plasmodium protein, unknown function	1	474	2.257	PRELSG_0205200	PF3D7_0112100	5.13365	1
PGAL8A_00107900	acetyltransferase, putative	6	663	19.708	PRELSG_0112700	PF3D7_0805400		0		Pfam:PF00583.19(Acetyltransf_1)
PGAL8A_00108000	conserved Plasmodium protein, unknown function	1	3027	34.823	PRELSG_0112600	PF3D7_0805500		0
PGAL8A_00108100	PAP2-like protein, putative	1	906	14.057	PRELSG_0112500	PF3D7_0805600		6		Pfam:PF01569.16(PAP2)
PGAL8A_00108200	serine/threonine protein kinase, FIKK family	2	3657	124.031	PRELSG_0112400	PF3D7_0805700		0		Pfam:PF00069.20(Pkinase)
PGAL8A_00108300	conserved Plasmodium protein, unknown function	1	2154	88.653	PRELSG_0112300	PF3D7_0805800		0		Pfam:PF00307.26(CH)
PGAL8A_00108400	conserved protein, unknown function	6	720	98.746	PRELSG_0112200	PF3D7_0805900		0		Pfam:PF09725.4(Fra10Ac1)
PGAL8A_00108500	AAA family ATPase, putative	2	3405	10.066	PRELSG_0112100	PF3D7_0806000		0		Pfam:PF00004.24(AAA)
PGAL8A_00108600	conserved Plasmodium protein, unknown function	1	1644	9.474	PRELSG_0112000	PF3D7_0806100		0
PGAL8A_00108700	C-mannosyltransferase, putative	10	2955	15.475	PRELSG_0111900	PF3D7_0806200		0		Pfam:PF10034.4(Dpy19)
PGAL8A_00108800	ferlin, putative	3	4722	51.472	PRELSG_0111800	PF3D7_0806300		1		Pfam:PF00168.25(C2)
PGAL8A_00108900	glycosyltransferase family 28 protein, putative	1	510	16.489	PRELSG_0111700	PF3D7_0806400		0		Pfam:PF04101.11(Glyco_tran_28_C)
PGAL8A_00109000	DnaJ protein, putative	1	1695	101.127	PRELSG_0111600	PF3D7_0806500		0		Pfam:PF00226.26(DnaJ),Pfam:PF14308.1(DnaJ-X)
PGAL8A_00109100	kinesin-like protein, putative	5	2649	6.72	PRELSG_0111500	PF3D7_0806600		0		Pfam:PF00225.18(Kinesin)
PGAL8A_00109200	conserved Plasmodium membrane protein, unknownfunction	4	6387	25.677	PRELSG_0111400	PF3D7_0806700		2
PGAL8A_00109300	protein tyrosine phosphatase, putative	1	3450	7.119	PRELSG_0111300			0		Pfam:PF00782.15(DSPc)
PGAL8A_00109400	vacuolar proton translocating ATPase subunit A,putative	1	2721	71.457	PRELSG_0111200	PF3D7_0806800		6		Pfam:PF01496.14(V_ATPase_I)
PGAL8A_00109500	conserved Plasmodium protein, unknown function	1	1056	13.878	PRELSG_0111100	PF3D7_0806900		0
PGAL8A_00109600	gas41 homologue, putative	9	666	22.82	PRELSG_0111000	PF3D7_0807000		0		Pfam:PF03366.11(YEATS)
PGAL8A_00109700	ATP-dependent RNA helicase DHH1, putative	2	4125	28.207	PRELSG_0110900	PF3D7_0807100		1		Pfam:PF00270.24(DEAD),Pfam:PF00271.26(Helicase_C)
PGAL8A_00109800	adenylate kinase 2, putative	1	966	94.487	PRELSG_0507100	PF3D7_0816900		0		Pfam:PF00406.17(ADK)
PGAL8A_00109900	NEDD8-activating enzyme E1 catalytic subunit,putative	1	1149	8.75	PRELSG_0507000	PF3D7_0817000		0		Pfam:PF00899.16(ThiF),Pfam:PF02134.16(UBACT)
PGAL8A_00110000	GTPase, putative	1	2127	43.315	PRELSG_0506900	PF3D7_0817100		1		Pfam:PF01926.18(MMR_HSR1),Pfam:PF10396.4(TrmE_N),Pfam:PF12631.2(GTPase_Cys_C)
PGAL8A_00110100	conserved Plasmodium protein, unknown function	1	2037	47.739	PRELSG_0506800	PF3D7_0817200		1
PGAL8A_00110200	asparagine-rich antigen, putative	1	5763	68.878	PRELSG_0506700	PF3D7_0817300		0
PGAL8A_00110300	phosphatase, putative	1	1437	3.509	PRELSG_0506600	PF3D7_0817400		0		Pfam:PF08645.6(PNK3P)
PGAL8A_00110400	protein kinase c inhibitor-like protein,putative	6	555	75.164	PRELSG_0506500	PF3D7_0817500		0	22	Pfam:PF01230.18(HIT)
PGAL8A_00110500	conserved Plasmodium protein, unknown function	2	2928	28.502	PRELSG_0506400	PF3D7_0817600		0
PGAL8A_00110700	rhoptry neck protein 5, putative	31	3459	188.201	PRELSG_0506300	PF3D7_0817700		0	21
PGAL8A_00110800	conserved Plasmodium protein, unknown function	2	162	76.042	PRELSG_0506200	PF3D7_0817800		0
PGAL8A_00110900	hypothetical protein	1	300	2079.58	PRELSG_0506100	PF3D7_0817900		0		Pfam:PF00505.14(HMG_box)
PGAL8A_00111000	conserved protein, unknown function	1	1377	163.945	PRELSG_0506000	PF3D7_0818000		0		Pfam:PF08648.7(DUF1777)
PGAL8A_00111100	zinc finger protein, putative	2	1539	32.376	PRELSG_0505900	PF3D7_0818100		0
PGAL8A_00111200	14-3-3 protein, putative	4	789	5438.74	PRELSG_0505800	PF3D7_0818200		0		Pfam:PF00244.15(14-3-3)
PGAL8A_00111300	dynactin subunit 6, putative	4	1671	1.732	PRELSG_0505700	PF3D7_0818300		0
PGAL8A_00111400	rRNA-processing protein FCF1, putative	2	582	62.675	PRELSG_0505600	PF3D7_0818400		0		Pfam:PF04900.7(Fcf1)
PGAL8A_00111500	zinc finger protein, putative	2	489	201.375	PRELSG_0505500	PF3D7_0818500		0		Pfam:PF01428.11(zf-AN1),Pfam:PF01754.11(zf-A20)
PGAL8A_00111600	BEM46-like protein, putative	10	825	9.012	PRELSG_0505400	PF3D7_0818600		0		Pfam:PF12695.2(Abhydrolase_5)
PGAL8A_00111700	DNA helicase, putative	5	2817	126.885	PRELSG_0505300	PF3D7_0818700		0		Pfam:PF00176.18(SNF2_N),Pfam:PF00271.26(Helicase_C)
PGAL8A_00111800	U3 small nucleolar ribonucleoprotein proteinIMP4, putative	1	1014	19.914	PRELSG_0505200	PF3D7_0818800		0		Pfam:PF04427.13(Brix)
PGAL8A_00111900	heat shock protein 70, putative	1	2019	10612.1				0		Pfam:PF00012.15(HSP70)
PGAL8A_00112000	conserved Plasmodium protein, unknown function	5	4323	63.56	PRELSG_0505000	PF3D7_0819000		0
PGAL8A_00112100	BRIX domain, putative	2	864	57.25	PRELSG_0504900	PF3D7_0819100		0		Pfam:PF04427.13(Brix)
PGAL8A_00112200	perforin like protein 5, putative	1	1890	5.969	PRELSG_0504800	PF3D7_0819200		0	24	Pfam:PF01823.14(MACPF)
PGAL8A_00112300	conserved Plasmodium protein, unknown function	1	2922	9.366	PRELSG_0504700	PF3D7_0819300		0
PGAL8A_00112400	perforin like protein 4, putative	1	1896	3.676	PRELSG_0504600	PF3D7_0819400		1		Pfam:PF01823.14(MACPF)
PGAL8A_00112500	conserved protein, unknown function	13	1158	38.806	PRELSG_0504500	PF3D7_0819500		1		Pfam:PF02582.9(DUF155)
PGAL8A_00112600	conserved Plasmodium protein, unknown function	2	699	121.238	PRELSG_0504400	PF3D7_0819600		0		Pfam:PF00240.18(ubiquitin)
PGAL8A_00112700	conserved Plasmodium protein, unknown function	1	1569	23.93	PRELSG_0504300	PF3D7_0819700		1
PGAL8A_00112800	conserved Plasmodium protein, unknown function	16	3726	13.047	PRELSG_0504200	PF3D7_0819800		1
PGAL8A_00112900	U6 snRNA-associated Sm-like protein LSm3,putative	4	276	62.362	PRELSG_0504100	PF3D7_0819900		0		Pfam:PF01423.17(LSM)
PGAL8A_00113000	Snf2-related CBP activator, putative	5	5286	146.15	PRELSG_0504000	PF3D7_0820000		0		Pfam:PF00176.18(SNF2_N),Pfam:PF00271.26(Helicase_C)
PGAL8A_00113100	conserved Plasmodium protein, unknown function	4	1029	25.663	PRELSG_0503900	PF3D7_0820100		0	18
PGAL8A_00113200	phosphatidylglycerophosphate synthase, putative	1	1905	43.825	PRELSG_0503800	PF3D7_0820200		0		Pfam:PF13091.1(PLDc_2)
PGAL8A_00113300	conserved Plasmodium protein, unknown function	1	1299	42.79	PRELSG_0503700	PF3D7_0820300		2
PGAL8A_00113400	conserved Plasmodium protein, unknown function	2	1377	19.852	PRELSG_0503600	PF3D7_0820400		1
PGAL8A_00113500	C-13 antigen	1	1959	14.621	PRELSG_0503500	PF3D7_0820500		6		Pfam:PF03878.10(YIF1)
PGAL8A_00113600	conserved Plasmodium membrane protein, unknownfunction	3	1374	22.472	PRELSG_0503400	PF3D7_0820600		4	24
PGAL8A_00113700	2-oxoglutarate dehydrogenase E1 component,putative	2	3111	83.873	PRELSG_0503300	PF3D7_0820700		0		Pfam:PF00676.15(E1_dh),Pfam:PF02779.19(Transket_pyr)
PGAL8A_00113800	conserved Plasmodium protein, unknown function	1	2304	8.802	PRELSG_0503200	PF3D7_0820800		1
PGAL8A_00113900	conserved Plasmodium protein, unknown function	3	4305	10.694	PRELSG_0503100	PF3D7_0820900		3
PGAL8A_00114000	hypothetical protein	7	1518	19.499	PRELSG_0503000			0
PGAL8A_00114100	conserved Plasmodium protein, unknown function	5	1545	38.675	PRELSG_0502900	PF3D7_0821000		2		Pfam:PF00350.18(Dynamin_N)
PGAL8A_00114200	protein kinase 1, putative	2	2820	42.886	PRELSG_0502800	PF3D7_0821100		0		Pfam:PF00069.20(Pkinase)
PGAL8A_00114300	zinc transporter ZIP domain-containing protein	2	1335	14.318	PRELSG_0502700			6		Pfam:PF02535.17(Zip)
PGAL8A_00114400	conserved Plasmodium protein, unknown function	1	603	131.825	PRELSG_0502600	PF3D7_0821200		0
PGAL8A_00114500	ATP-dependent RNA helicase DHX36, putative	3	2442	25.793	PRELSG_0502500	PF3D7_0821300		0		Pfam:PF00270.24(DEAD),Pfam:PF00271.26(Helicase_C),Pfam:PF04408.18(HA2),Pfam:PF07717.11(OB_NTP_bind)
PGAL8A_00114600	ribosomal RNA small subunit methyltransferaseNEP1, putative	1	684	10.328	PRELSG_0502400	PF3D7_0821500		0		Pfam:PF03587.9(EMG1)
PGAL8A_00114700	clp1-related protein, putative	1	1608	21.975	PRELSG_0502300	PF3D7_0821600		0
PGAL8A_00114800	60S ribosomal protein L22, putative	3	414	118.814	PRELSG_0502200	PF3D7_0821700		0		Pfam:PF01776.12(Ribosomal_L22e)
PGAL8A_00114900	protein transport protein SEC61 subunit beta,putative	3	237	62.002	PRELSG_0502100	PF3D7_0821800		1		Pfam:PF03911.11(Sec61_beta)
PGAL8A_00115000	conserved Plasmodium protein, unknown function	4	324	17.335	PRELSG_0502000	PF3D7_0821900		0
PGAL8A_00115100	mitochondrial ribosomal protein L4 precursor,putative	2	1884	55.086	PRELSG_0501900	PF3D7_0822000		0		Pfam:PF00573.17(Ribosomal_L4)
PGAL8A_00115200	mediator of RNA polymerase II transcriptionsubunit 7, putative	1	720	6.271	PRELSG_0501800	PF3D7_0822100		0		Pfam:PF05983.6(Med7)
PGAL8A_00115300	zinc-binding dehydrogenase, putative	1	1161	11.119	PRELSG_0501700			0		Pfam:PF00107.21(ADH_zinc_N),Pfam:PF08240.7(ADH_N)
PGAL8A_00115400	conserved Plasmodium protein, unknown function	3	3945	6.879	PRELSG_0501600	PF3D7_0822200		5		Pfam:PF12237.3(PCIF1_WW)
PGAL8A_00115500	small nuclear ribonucleoprotein G, putative	2	252	16.232	PRELSG_0501500	PF3D7_0822300		0		Pfam:PF01423.17(LSM)
PGAL8A_00115600	conserved Plasmodium protein, unknown function	7	1596	6.245	PRELSG_0501400	PF3D7_0822400		0
PGAL8A_00115700	dynein light chain 1, putative	6	597	13.56	PRELSG_0501300	PF3D7_0822500		0		Pfam:PF14580.1(LRR_9)
PGAL8A_00115800	protein transport protein SEC23, putative	2	2280	277.772	PRELSG_0501200	PF3D7_0822600		0		Pfam:PF00626.17(Gelsolin),Pfam:PF04810.10(zf-Sec23_Sec24),Pfam:PF04811.10(Sec23_trunk),Pfam:PF04815.10(Sec23_helical),Pfam:PF08033.7(Sec23_BS)
PGAL8A_00115900	conserved Plasmodium protein, unknown function	1	2562	0.669	PRELSG_0501100	PF3D7_0822700		2	26
PGAL8A_00116000	U5 snrnp-specific protein, putative	1	972	32.267	PRELSG_0501000	PF3D7_0822800		0		Pfam:PF00400.27(WD40)
PGAL8A_00116100	conserved Plasmodium protein, unknown function	1	2739	254.507	PRELSG_0500900	PF3D7_0822900		0
PGAL8A_00116200	serine/threonine protein kinase VPS15, putative	4	3057	8.847	PRELSG_0500800	PF3D7_0823000		3		Pfam:PF00069.20(Pkinase)
PGAL8A_00116300	RWD domain-containing protein, putative	5	687	35.691	PRELSG_0500700	PF3D7_0823100		0		Pfam:PF05773.17(RWD)
PGAL8A_00116400	RNA-binding protein, putative	3	861	1522.06	PRELSG_0500600	PF3D7_0823200		0		Pfam:PF00076.17(RRM_1),Pfam:PF00397.21(WW)
PGAL8A_00116500	histone acetyltransferase GCN5, putative	4	6102	155.12	PRELSG_0500500	PF3D7_0823300		0		Pfam:PF00583.19(Acetyltransf_1)
PGAL8A_00116600	alpha/beta-hydrolase, putative	5	1500	4.054	PRELSG_0500400	PF3D7_0823400		0
PGAL8A_00116700	inner membrane complex protein 1i, putative	1	1482	59.285	PRELSG_0500300	PF3D7_0823500		0		Pfam:PF12314.3(IMCp)
PGAL8A_00116800	lipoate-protein ligase B, putative	1	1290	25.904	PRELSG_0500200	PF3D7_0823600		0	21	Pfam:PF03099.14(BPL_LplA_LipB)
PGAL8A_00116900	conserved Plasmodium protein, unknown function	2	198	36.591	PRELSG_0500100	PF3D7_0823700		1
PGAL8A_00117000	DnaJ protein, putative	1	1965	89.293	PRELSG_1306100	PF3D7_0823800		3		Pfam:PF00085.15(Thioredoxin),Pfam:PF00226.26(DnaJ)
PGAL8A_00117100	dicarboxylate/tricarboxylate carrier, putative	1	957	47.782	PRELSG_1306200	PF3D7_0823900		2		Pfam:PF00153.22(Mito_carr)
PGAL8A_00117200	conserved Plasmodium protein, unknown function	1	2265	2.105	PRELSG_1306300	PF3D7_0824000		0
PGAL8A_00117300	exonuclease, putative	1	1224	5.019	PRELSG_1306400	PF3D7_0824100		0		Pfam:PF01612.15(DNA_pol_A_exo1)
PGAL8A_00117400	conserved Plasmodium protein, unknown function	3	3114	19.381	PRELSG_1306500	PF3D7_0824200		0
PGAL8A_00117500	GTP-binding protein, putative	1	2214	32.148	PRELSG_1306600	PF3D7_0824300		0		Pfam:PF01018.17(GTP1_OBG),Pfam:PF01926.18(MMR_HSR1)
PGAL8A_00117600	nucleoside transporter 2, putative	1	1713	27.976	PRELSG_1306700	PF3D7_0824400		10
PGAL8A_00117700	conserved Plasmodium protein, unknown function	2	1095	11.413	PRELSG_1306800	PF3D7_0824500		0
PGAL8A_00117800	Fe-S cluster assembly protein DRE2, putative	5	735	56.949	PRELSG_1306900	PF3D7_0824600		0		Pfam:PF05093.8(CIAPIN1)
PGAL8A_00117900	lipase maturation factor, putative	16	1767	8.499	PRELSG_1307000	PF3D7_0824700		10		Pfam:PF06762.9(LMF1)
PGAL8A_00118000	conserved Plasmodium protein, unknown function	2	2820	28.81	PRELSG_1307100	PF3D7_0824800		2
PGAL8A_00118100	conserved Plasmodium protein, unknown function	1	2964	25.545	PRELSG_1307200	PF3D7_0824900		0
PGAL8A_00118200	conserved Plasmodium protein, unknown function	2	5583	90.461	PRELSG_1307300	PF3D7_0825000		0
PGAL8A_00118300	conserved Plasmodium protein, unknown function	6	558	8.275	PRELSG_1307400	PF3D7_0825100		0		Pfam:PF12796.2(Ank_2)
PGAL8A_00118400	translation initiation factor IF-3, putative	4	489	12.628	PRELSG_1307500	PF3D7_0825200	8.52111	1		Pfam:PF00707.17(IF3_C)
PGAL8A_00118500	conserved protein, unknown function	1	447	17.845	PRELSG_1307600	PF3D7_0825300		1		Pfam:PF02810.10(SEC-C),Pfam:PF10260.4(SAYSvFN)
PGAL8A_00118600	conserved Plasmodium protein, unknown function	3	234	106.197	PRELSG_1307700	PF3D7_0825400		0
PGAL8A_00118700	conserved protein, unknown function	1	2061	49.058	PRELSG_1307800	PF3D7_0825500		0		Pfam:PF00569.12(ZZ),Pfam:PF12936.2(Kri1_C)
PGAL8A_00118800	cytochrome c oxidase assembly protein, putative	1	258	8.629	PRELSG_1307900	PF3D7_0825600		0		Pfam:PF10203.4(Pet191_N)
PGAL8A_00118900	conserved Plasmodium protein, unknown function	1	888	24.893	PRELSG_1308000	PF3D7_0825700		0	19
PGAL8A_00119000	conserved Plasmodium protein, unknown function	1	1245	34.17	PRELSG_1308100	PF3D7_0825800		0	26
PGAL8A_00119100	conserved Plasmodium protein, unknown function	1	1164	14.28	PRELSG_1308200	PF3D7_0825900		0
PGAL8A_00119200	conserved Plasmodium protein, unknown function	1	2706	9.422	PRELSG_1308300	PF3D7_0826000		0
PGAL8A_00119300	E3 ubiquitin-protein ligase, putative	1	23940	210.469	PRELSG_1308400	PF3D7_0826100		4		Pfam:PF00632.20(HECT),Pfam:PF06012.7(DUF908)
PGAL8A_00119400	alpha/beta hydrolase, putative	1	2205	66.76	PRELSG_1308500	PF3D7_0826200		0		Pfam:PF12697.2(Abhydrolase_6)
PGAL8A_00119500	SPRY domain, putative	1	1563	35.009	PRELSG_1308600	PF3D7_0826300		0		Pfam:PF00622.23(SPRY)
PGAL8A_00119600	dehydrodolichyl diphosphate synthetase, putative	8	942	46.773	PRELSG_1308700	PF3D7_0826400		0		Pfam:PF01255.14(Prenyltransf)
PGAL8A_00119700	ubiquitin conjugation factor E4 B, putative	1	3792	124.998	PRELSG_1308800	PF3D7_0826500		0		Pfam:PF04564.10(U-box),Pfam:PF10408.4(Ufd2P_core)
PGAL8A_00119800	SNARE protein, putative	1	810	31.971	PRELSG_1308900	PF3D7_0826600		0		Pfam:PF00957.16(Synaptobrevin)
PGAL8A_00119900	receptor for activated c kinase, putative	2	969	649.166	PRELSG_1309000	PF3D7_0826700		0		Pfam:PF00400.27(WD40)
PGAL8A_00120100	conserved Plasmodium protein, unknown function	3	1851	26.953	PRELSG_1309200	PF3D7_0826900		0
PGAL8A_00120200	ATP-dependent RNA helicase DBP10, putative	1	3486	48.939	PRELSG_1309300	PF3D7_0827000		0		Pfam:PF00270.24(DEAD),Pfam:PF00271.26(Helicase_C)
PGAL8A_00120300	translation initiation factor IF-2, putative	1	3825	33.658	PRELSG_1309400	PF3D7_0827100		0		Pfam:PF00009.22(GTP_EFTU),Pfam:PF11987.3(IF-2)
PGAL8A_00120400	conserved Plasmodium protein, unknown function	2	3876	31.636	PRELSG_1309500			0
PGAL8A_00120500	conserved Plasmodium protein, unknown function	1	2796	60.29	PRELSG_1309600	PF3D7_0827300		0
PGAL8A_00120600	conserved Plasmodium protein, unknown function	1	621	28.464	PRELSG_1309700	PF3D7_0827400	3.76535	1	22
PGAL8A_00120700	apicoplast ribosomal protein L21 precursor,putative	1	927	48.675	PRELSG_1309800	PF3D7_0827500		1		Pfam:PF00829.16(Ribosomal_L21p)
PGAL8A_00120800	conserved Plasmodium protein, unknown function	2	4638	52.114	PRELSG_1309900	PF3D7_0827600		0	17
PGAL8A_00120900	magnesium transporter, putative	1	2256	9.38	PRELSG_1310000	PF3D7_0827700		9		Pfam:PF05653.9(Mg_trans_NIPA)
PGAL8A_00121000	SET domain protein, putative	1	6501	46.772	PRELSG_1310100	PF3D7_0827800		0
PGAL8A_00121100	protein disulfide isomerase, putative	2	1449	3234.52	PRELSG_1310200	PF3D7_0827900		0	19	Pfam:PF00085.15(Thioredoxin),Pfam:PF13848.1(Thioredoxin_6)
PGAL8A_00121200	rhomboid protease ROM3, putative	4	804	7.221	PRELSG_1310300	PF3D7_0828000		7		Pfam:PF01694.17(Rhomboid)
PGAL8A_00121300	conserved Plasmodium protein, unknown function	1	2826	7.299	PRELSG_1310400	PF3D7_0828100		0
PGAL8A_00121400	leucine--tRNA ligase, putative	1	4011	12.836	PRELSG_1310500	PF3D7_0828200		2		Pfam:PF00133.17(tRNA-synt_1),Pfam:PF08264.8(Anticodon_1)
PGAL8A_00121500	conserved Plasmodium protein, unknown function	1	1488	245.33	PRELSG_1310600	PF3D7_0828300		0
PGAL8A_00121600	mitochondrial inner membrane protein OXA1,putative	1	1362	19.556	PRELSG_1310700	PF3D7_0828400		4		Pfam:PF02096.15(60KD_IMP)
PGAL8A_00121700	translation initiation factor eIF-2B subunitalpha, putative	4	1026	14.667	PRELSG_1310800	PF3D7_0828500		0		Pfam:PF01008.12(IF-2B)
PGAL8A_00121800	hypothetical protein	2	2538	1.02	PRELSG_1310900			0
PGAL8A_00121900	folate transporter 1, putative	4	1497	5.964	PRELSG_1311000	PF3D7_0828600		12		Pfam:PF03092.11(BT1)
PGAL8A_00122000	conserved Plasmodium protein, unknown function	1	3261	15.214	PRELSG_1311100	PF3D7_0828700		0
PGAL8A_00122100	GPI-anchored micronemal antigen, putative	1	2256	11.06	PRELSG_1311200	PF3D7_0828800		2	22
PGAL8A_00122200	conserved Plasmodium protein, unknown function	4	576	26.083	PRELSG_1311300	PF3D7_0828900		0
PGAL8A_00122300	conserved Plasmodium protein, unknown function	2	4875	34.724	PRELSG_1311400	PF3D7_0829000		2
PGAL8A_00122400	conserved protein, unknown function	7	651	37.435	PRELSG_1311500	PF3D7_0829100		0		Pfam:PF06244.7(DUF1014)
PGAL8A_00122500	prohibitin, putative	1	819	299.876	PRELSG_1311600	PF3D7_0829200		0		Pfam:PF01145.20(Band_7)
PGAL8A_00122600	U6 snRNA-associated Sm-like protein LSm8,putative	4	288	89.945	PRELSG_1311700	PF3D7_0829300		0		Pfam:PF01423.17(LSM)
PGAL8A_00122700	prolyl 4-hydroxylase subunit alpha, putative	1	1329	60.795	PRELSG_1311800	PF3D7_0829400		0
PGAL8A_00122800	conserved Plasmodium protein, unknown function	3	14004	0.841	PRELSG_0027600			0
PGAL8A_00122900	early transcribed membrane protein	1	522	0.422				2	25	Pfam:PF09716.5(ETRAMP)
PGAL8A_00123000	Plasmodium exported protein, unknown function	1	468	1.513				0
PGAL8A_00123100	surface-associated interspersed protein (SURFIN)	3	3789	0.035				0	23
PGAL8A_00123200	Plasmodium exported protein, unknown function	2	687	0.806			4.0523	3
PGAL8A_00123300	TRAP-like protein, putative, fragment,pseudogene	5	813	0.61				0
PGAL8A_00123400	heat shock protein, putative	1	912	1017.11				0	28	Pfam:PF13589.1(HATPase_c_3)
PGAL8A_00123500	transcription factor with AP2 domain(s),putative	1	7530	38.394	PRELSG_1438000	PF3D7_1222400		0		Pfam:PF00847.15(AP2)
PGAL8A_00123600	diphthine--ammonia ligase, putative	7	750	25.433	PRELSG_1438100	PF3D7_1222500		0		Pfam:PF01902.12(ATP_bind_4)
PGAL8A_00123700	transcription factor with AP2 domain(s),putative	1	7191	39.418	PRELSG_1438200	PF3D7_1222600		0
PGAL8A_00123800	glideosome-associated protein 45, putative	1	591	138.069	PRELSG_1438300	PF3D7_1222700		0
PGAL8A_00123900	conserved Plasmodium protein, unknown function	7	789	20.529	PRELSG_1438400	PF3D7_1222800		0
PGAL8A_00124000	conserved Plasmodium protein, unknown function	2	1326	7.327	PRELSG_1438500	PF3D7_1222900		0
PGAL8A_00124100	conserved Plasmodium protein, unknown function	4	396	13.19	PRELSG_1438600	PF3D7_1223000		1
PGAL8A_00124200	CAMP-dependent protein kinase regulatory subunit,putative	3	1320	342.817	PRELSG_1438700	PF3D7_1223100		0		Pfam:PF00027.24(cNMP_binding)
PGAL8A_00124300	nucleus export protein BRR6, putative	1	1281	55.151	PRELSG_1438800	PF3D7_1223200		3		Pfam:PF10104.4(Brr6_like_C_C)
PGAL8A_00124400	DNA gyrase subunit A, putative	1	3945	68.623	PRELSG_1438900	PF3D7_1223300		1		Pfam:PF00521.15(DNA_topoisoIV),Pfam:PF03989.8(DNA_gyraseA_C)
PGAL8A_00124500	phospholipid-transporting ATPase, putative	7	4629	92.666	PRELSG_1439000	PF3D7_1223400		10		Pfam:PF00122.15(E1-E2_ATPase),Pfam:PF00702.21(Hydrolase)
PGAL8A_00124600	conserved Plasmodium protein, unknown function	5	13008	37.198	PRELSG_1439100	PF3D7_1223500		0
PGAL8A_00124700	conserved Plasmodium protein, unknown function	2	4554	8.132	PRELSG_1439200	PF3D7_1223600		5
PGAL8A_00124800	vacuolar iron transporter, putative	2	825	20.253	PRELSG_1439300	PF3D7_1223700		5		Pfam:PF01988.14(VIT1)
PGAL8A_00124900	mitochondrial carrier protein, putative	1	912	15.5	PRELSG_1439400	PF3D7_1223800		0		Pfam:PF00153.22(Mito_carr)
PGAL8A_00125000	50S ribosomal protein L24, putative	1	693	40.978	PRELSG_1439500	PF3D7_1223900		0		Pfam:PF00467.24(KOW)
PGAL8A_00125100	GTP cyclohydrolase I, putative	1	1194	34.51	PRELSG_1439600	PF3D7_1224000		0		Pfam:PF01227.17(GTP_cyclohydroI)
PGAL8A_00125200	conserved Plasmodium protein, unknown function	4	576	22.165	PRELSG_1439700	PF3D7_1224100		0
PGAL8A_00125300	BRO1 domain-containing protein, putative	5	2454	18.674	PRELSG_1439800	PF3D7_1224200		0		Pfam:PF03097.13(BRO1)
PGAL8A_00125400	polyadenylate-binding protein, putative	1	2373	1820.74	PRELSG_1439900	PF3D7_1224300		0		Pfam:PF00076.17(RRM_1),Pfam:PF00658.13(PABP)
PGAL8A_00125500	conserved Plasmodium protein, unknown function	2	1626	17.175	PRELSG_1440000	PF3D7_1224400		0
PGAL8A_00125600	histone chaperone ASF1, putative	2	798	299.842	PRELSG_1440100	PF3D7_1224500		0		Pfam:PF04729.8(ASF1_hist_chap)
PGAL8A_00125700	cytochrome c heme lyase, putative	5	687	46.466	PRELSG_1440200	PF3D7_1224600		0		Pfam:PF01265.12(Cyto_heme_lyase)
PGAL8A_00125800	conserved Plasmodium protein, unknown function	1	4035	61.663	PRELSG_1440300	PF3D7_1224700		0
PGAL8A_00125900	conserved Plasmodium protein, unknown function	1	972	45.345	PRELSG_1440400	PF3D7_1224800		0
PGAL8A_00126000	splicing factor 3B subunit 6, putative	2	330	34.541	PRELSG_1440500	PF3D7_1224900		0		Pfam:PF00076.17(RRM_1)
PGAL8A_00126100	conserved Plasmodium protein, unknown function	3	4791	5.243	PRELSG_1440600	PF3D7_1225000		0
PGAL8A_00126200	isoleucine--tRNA ligase, putative	4	4653	8.15	PRELSG_1440700	PF3D7_1225100		0	21	Pfam:PF00133.17(tRNA-synt_1),Pfam:PF06827.9(zf-FPG_IleRS),Pfam:PF08264.8(Anticodon_1)
PGAL8A_00126300	conserved Plasmodium protein, unknown function	2	3663	111.015	PRELSG_1440800	PF3D7_1225200		0		Pfam:PF13921.1(Myb_DNA-bind_6)
PGAL8A_00126400	conserved Plasmodium protein, unknown function	2	1071	115.507	PRELSG_1440900	PF3D7_1225300		0		Pfam:PF04900.7(Fcf1)
PGAL8A_00126500	conserved Plasmodium protein, unknown function	1	687	9.321	PRELSG_1441000	PF3D7_1225400		0		Pfam:PF08524.6(rRNA_processing)
PGAL8A_00126600	small subunit rRNA processing factor, putative	2	1197	14.865	PRELSG_1441100	PF3D7_1225500		0		Pfam:PF03587.9(EMG1)
PGAL8A_00126700	conserved Plasmodium protein, unknown function	5	2373	70.625	PRELSG_1441200	PF3D7_1225600		0
PGAL8A_00126800	conserved Plasmodium protein, unknown function	1	4167	34.22	PRELSG_1441300	PF3D7_1225700		0		Pfam:PF11916.3(Vac14_Fig4_bd),Pfam:PF12755.2(Vac14_Fab1_bd)
PGAL8A_00126900	ubiquitin-activating enzyme E1, putative	3	3330	208.05	PRELSG_1441400	PF3D7_1225800		0		Pfam:PF00899.16(ThiF),Pfam:PF02134.16(UBACT),Pfam:PF09358.5(UBA_e1_C),Pfam:PF10585.4(UBA_e1_thiolCys)
PGAL8A_00127000	conserved Plasmodium protein, unknown function	1	1986	62.48	PRELSG_1441500	PF3D7_1225900		1
PGAL8A_00127100	conserved Plasmodium protein, unknown function	2	2607	15.648	PRELSG_1441600	PF3D7_1226000		0
PGAL8A_00127200	haloacid dehalogenase-like hydrolase, putative	1	900	40.766	PRELSG_1441700	PF3D7_1226100		0		Pfam:PF08282.7(Hydrolase_3)
PGAL8A_00127300	conserved Plasmodium protein, unknown function	1	1395	143.361	PRELSG_1441800	PF3D7_1226200		0
PGAL8A_00127400	haloacid dehalogenase-like hydrolase, putative	1	888	109.466	PRELSG_1441900	PF3D7_1226300		0		Pfam:PF08282.7(Hydrolase_3)
PGAL8A_00127500	conserved Plasmodium protein, unknown function	5	2472	17.843	PRELSG_1442000	PF3D7_1226400		0		Pfam:PF07035.7(Mic1)
PGAL8A_00127600	RAP protein, putative	1	3825	13.588	PRELSG_1442100	PF3D7_1226500		0		Pfam:PF08373.5(RAP)
PGAL8A_00127700	proliferating cell nuclear antigen 2, putative	2	795	449.427	PRELSG_1442200	PF3D7_1226600		0		Pfam:PF00705.13(PCNA_N),Pfam:PF02747.10(PCNA_C)
PGAL8A_00127800	U3 small nucleolar RNA-interacting protein 2,putative	1	1788	20.41	PRELSG_1442300	PF3D7_1226700		0		Pfam:PF00400.27(WD40)
PGAL8A_00127900	ataxin-3, putative	6	1143	264.617	PRELSG_1442400	PF3D7_1226800		0		Pfam:PF02099.12(Josephin)
PGAL8A_00128000	conserved Plasmodium protein, unknown function	1	1386	335.511	PRELSG_1442500	PF3D7_1226900		3	23
PGAL8A_00128100	conserved Plasmodium protein, unknown function	1	483	7.068	PRELSG_1442600	PF3D7_1227000		0
PGAL8A_00128200	DNA helicase 60, putative	1	2103	42.684	PRELSG_1442700	PF3D7_1227100		0		Pfam:PF00270.24(DEAD),Pfam:PF00271.26(Helicase_C)
PGAL8A_00128300	potassium channel, putative	2	5646	9.531	PRELSG_1442800	PF3D7_1227200		7		Pfam:PF07885.11(Ion_trans_2)
PGAL8A_00128400	conserved Plasmodium protein, unknown function	1	3069	21.71	PRELSG_1442900	PF3D7_1227300		1
PGAL8A_00128500	conserved Plasmodium protein, unknown function	1	2838	23.106	PRELSG_1443000	PF3D7_1227400		0		Pfam:PF01909.18(NTP_transf_2)
PGAL8A_00128600	cyclin, putative	1	7053	47.277	PRELSG_1443100	PF3D7_1227500		0
PGAL8A_00128700	cyclin related protein, putative	2	2457	128.902	PRELSG_1443200	PF3D7_1227600		0
PGAL8A_00128800	conserved Plasmodium protein, unknown function	3	2256	115.877	PRELSG_1443300	PF3D7_1227700		0
PGAL8A_00128900	histone S-adenosyl methyltransferase, putative	1	3108	35.976	PRELSG_1443400	PF3D7_1227800		1		Pfam:PF04055.16(Radical_SAM)
PGAL8A_00129000	RNA pseudouridylate synthase, putative	1	1500	15.895	PRELSG_1443500	PF3D7_1227900		0		Pfam:PF00849.17(PseudoU_synth_2)
PGAL8A_00129100	conserved Plasmodium protein, unknown function	1	450	7.674	PRELSG_1443600	PF3D7_1228000		0
PGAL8A_00129200	leucine-rich repeat protein	3	1272	5.014	PRELSG_1443700	PF3D7_1228100		0
PGAL8A_00129300	conserved Plasmodium protein, unknown function	1	2214	3.613	PRELSG_1443800	PF3D7_1228200		0
PGAL8A_00129400	NIMA related kinase 1, putative	2	2559	178.509	PRELSG_1443900	PF3D7_1228300		0		Pfam:PF00069.20(Pkinase)
PGAL8A_00129500	conserved Plasmodium protein, unknown function	2	3519	66.16	PRELSG_1444000	PF3D7_1228400		0
PGAL8A_00129600	RNA pseudouridylate synthase, putative	3	1182	53.834	PRELSG_1444100	PF3D7_1228500		0		Pfam:PF00849.17(PseudoU_synth_2),Pfam:PF01479.20(S4)
PGAL8A_00129700	merozoite surface protein 9, putative	1	1647	2728.94	PRELSG_1444200	PF3D7_1228600		0	23
PGAL8A_00129800	conserved Plasmodium protein, unknown function	2	3204	84.029	PRELSG_1444300	PF3D7_1228700		0	20
PGAL8A_00129900	WD repeat-containing protein, putative	1	6546	63.049	PRELSG_1444400	PF3D7_1228800		1
PGAL8A_00130000	conserved Plasmodium protein, unknown function	20	2241	53.962	PRELSG_1444500	PF3D7_1228900		0
PGAL8A_00130100	conserved Plasmodium protein, unknown function	1	4536	13.862	PRELSG_1444600	PF3D7_1229000		8
PGAL8A_00130200	ABC transporter C family member 2, putative	1	5850	97.345				12		Pfam:PF00005.22(ABC_tran),Pfam:PF00664.18(ABC_membrane)
PGAL8A_00130300	hypothetical protein	4	2565	0.169	PRELSG_1146400			0
PGAL8A_00130400	fam-f protein	3	1725	16.927		PF3D7_1352900	2.22582	0
PGAL8A_00130500	conserved Plasmodium protein, unknown function	1	3888	54.96	PRELSG_1146300	PF3D7_0602000		0
PGAL8A_00130600	ATP-dependent RNA helicase, putative	2	3876	57.624	PRELSG_1146200	PF3D7_0602100		0		Pfam:PF00270.24(DEAD),Pfam:PF00271.26(Helicase_C),Pfam:PF08148.7(DSHCT),Pfam:PF13234.1(rRNA_proc-arch)
PGAL8A_00130700	MYND finger protein, putative	3	765	177.463	PRELSG_1146100	PF3D7_0602200		0		Pfam:PF01753.13(zf-MYND)
PGAL8A_00130800	liver merozoite formation protein, putative	1	906	57.531	PRELSG_1146000	PF3D7_0602300		1
PGAL8A_00130900	elongation factor G, putative	4	2844	49.517	PRELSG_1145900	PF3D7_0602400		1	31	Pfam:PF00009.22(GTP_EFTU),Pfam:PF00679.19(EFG_C),Pfam:PF03144.20(GTP_EFTU_D2),Pfam:PF03764.13(EFG_IV),Pfam:PF14492.1(EFG_II)
PGAL8A_00131000	geranylgeranyltransferase, putative	1	1083	32.955	PRELSG_1145800	PF3D7_0602500		0		Pfam:PF00432.16(Prenyltrans)
PGAL8A_00131100	conserved Plasmodium protein, unknown function	5	4233	59.191	PRELSG_1145700	PF3D7_0602600		0		Pfam:PF03399.11(SAC3_GANP)
PGAL8A_00131200	conserved Plasmodium protein, unknown function	1	1581	15.609	PRELSG_1145600	PF3D7_0602700		0
PGAL8A_00131300	JmjC domain containing protein, putative	1	2079	30.474	PRELSG_1145500	PF3D7_0602800		0		Pfam:PF13621.1(Cupin_8)
PGAL8A_00131400	conserved Plasmodium protein, unknown function	2	1239	31.612	PRELSG_1145400	PF3D7_0602900		0
PGAL8A_00131500	conserved Plasmodium protein, unknown function	1	1266	52.953	PRELSG_1145300	PF3D7_0603000		1		Pfam:PF13019.1(Telomere_Sde2)
PGAL8A_00131600	conserved Plasmodium protein, unknown function	1	1185	6.984	PRELSG_1145200	PF3D7_0603100		0
PGAL8A_00131700	mitochondrial chaperone BCS1, putative	1	1407	19.719	PRELSG_1145100	PF3D7_0603200		1		Pfam:PF00004.24(AAA),Pfam:PF08740.6(BCS1_N)
PGAL8A_00131800	dihydroorotate dehydrogenase, putative	1	1632	32.743	PRELSG_1145000	PF3D7_0603300		1		Pfam:PF01180.16(DHO_dh)
PGAL8A_00131900	trophozoite exported protein 1, putative	1	3087	93.732	PRELSG_1144900	PF3D7_0603400		0		Pfam:PF13923.1(zf-C3HC4_2)
PGAL8A_00132000	cation/H+ antiporter, putative	1	1323	5.833	PRELSG_1144800	PF3D7_0603500		10		Pfam:PF01699.19(Na_Ca_ex)
PGAL8A_00132100	conserved Plasmodium protein, unknown function	3	7092	49.843	PRELSG_1144700	PF3D7_0603600		2		Pfam:PF01388.16(ARID)
PGAL8A_00132200	phenylalanine--tRNA ligase, putative	1	1344	60.509	PRELSG_1144600	PF3D7_0603700		0		Pfam:PF01409.15(tRNA-synt_2d),Pfam:PF03147.9(FDX-ACB)
PGAL8A_00132300	centrosomal protein CEP76, putative	20	5826	43.675	PRELSG_1144500	PF3D7_0603800		1
PGAL8A_00132400	conserved Plasmodium protein, unknown function	1	1095	10.41	PRELSG_1144400	PF3D7_0603900		0
PGAL8A_00132500	conserved Plasmodium protein, unknown function	1	4839	33.298	PRELSG_1144300	PF3D7_0604000		0
PGAL8A_00132600	transcription factor with AP2 domain(s),putative	1	5820	224.199	PRELSG_1144200	PF3D7_0604100		0
PGAL8A_00132700	mitochondrial ribosomal protein L41, putative	3	282	18.008	PRELSG_1144100	PF3D7_0604200		0		Pfam:PF09809.4(MRP-L27)
PGAL8A_00132800	conserved Plasmodium protein, unknown function	1	1863	45.822	PRELSG_1144000	PF3D7_0604300		0
PGAL8A_00132900	conserved Plasmodium protein, unknown function	4	564	7.197	PRELSG_1143900	PF3D7_0604400		1	21
PGAL8A_00133000	conserved Plasmodium protein, unknown function	4	7125	92.839	PRELSG_1143800	PF3D7_0604500		0		Pfam:PF02213.11(GYF)
PGAL8A_00133100	DNA helicase, putative	2	4494	17.989	PRELSG_1143700	PF3D7_0604600		0		Pfam:PF00176.18(SNF2_N),Pfam:PF00271.26(Helicase_C),Pfam:PF01844.18(HNH)
PGAL8A_00133200	glyoxalase I, putative	6	915	32.609	PRELSG_1143600	PF3D7_0604700	0.876536	0		Pfam:PF12681.2(Glyoxalase_2)
PGAL8A_00133300	RAP protein, putative	1	3801	5.139	PRELSG_1143500	PF3D7_0604800		0
PGAL8A_00133400	conserved Plasmodium protein, unknown function	3	282	13.864	PRELSG_1143400	PF3D7_0604900		1
PGAL8A_00133500	50S ribosomal protein L24, putative	1	585	35.648	PRELSG_1143300	PF3D7_0605000		0		Pfam:PF00467.24(KOW)
PGAL8A_00133600	RNA-binding protein, putative	1	2049	31.999	PRELSG_1143200	PF3D7_0605100		0		Pfam:PF00013.24(KH_1)
PGAL8A_00133700	conserved Plasmodium protein, unknown function	6	636	67.842	PRELSG_1143100	PF3D7_0605200		0
PGAL8A_00133800	serine/threonine protein kinase, putative	4	1062	55.465	PRELSG_1143000	PF3D7_0605300		0		Pfam:PF00069.20(Pkinase)
PGAL8A_00133900	calcium-binding protein, putative	1	477	26.469	PRELSG_1142900	PF3D7_0605400		0		Pfam:PF13499.1(EF-hand_7)
PGAL8A_00134000	cyclin dependent kinase binding protein,putative	2	1386	27.209	PRELSG_1142800	PF3D7_0605500		0		Pfam:PF00134.18(Cyclin_N)
PGAL8A_00134100	nucleoside diphosphate kinase, putative	7	4935	5.212	PRELSG_1142700	PF3D7_0605600		0		Pfam:PF00334.14(NDK)
PGAL8A_00134200	conserved Plasmodium protein, unknown function	1	765	30.386	PRELSG_1142600	PF3D7_0605700		0
PGAL8A_00134300	DNA repair protein RAD50, putative	1	5406	32.839	PRELSG_1142500	PF3D7_0605800		0		Pfam:PF13476.1(AAA_23),Pfam:PF13558.1(SbcCD_C)
PGAL8A_00134400	long chain polyunsaturated fatty acid elongationenzyme, putative	5	885	70.514	PRELSG_1142400	PF3D7_0605900		7		Pfam:PF01151.13(ELO)
PGAL8A_00134500	conserved Plasmodium protein, unknown function	1	2847	60.594	PRELSG_1142300	PF3D7_0606000		0
PGAL8A_00134600	RNA-binding protein, putative	4	1515	268.249	PRELSG_1142200	PF3D7_0606100		0		Pfam:PF00076.17(RRM_1)
PGAL8A_00134700	ubiquitin-conjugating enzyme E2, putative	5	459	17.584	PRELSG_1142100	PF3D7_0606200		0		Pfam:PF00179.21(UQ_con)
PGAL8A_00134800	conserved Plasmodium protein, unknown function	1	336	19.479	PRELSG_1142000	PF3D7_0606300		0
PGAL8A_00134900	conserved Plasmodium protein, unknown function	5	375	6.167	PRELSG_1141900	PF3D7_0606400		0
PGAL8A_00135000	polypyrimidine tract-binding protein, putative	5	1917	90.717	PRELSG_1141800	PF3D7_0606500		0		Pfam:PF00076.17(RRM_1),Pfam:PF13893.1(RRM_5)
PGAL8A_00135100	conserved Plasmodium protein, unknown function	2	5340	72.542	PRELSG_1141700	PF3D7_0606600		0
PGAL8A_00135200	coatomer alpha subunit, putative	4	4041	107.652	PRELSG_1141600	PF3D7_0606700		0		Pfam:PF00400.27(WD40),Pfam:PF04053.9(Coatomer_WDAD),Pfam:PF06957.6(COPI_C)
PGAL8A_00135300	hypothetical protein	1	903	31.527	PRELSG_1141500	PF3D7_0606800		0	22
PGAL8A_00135400	glutaredoxin-like protein	1	630	71.872	PRELSG_1141400	PF3D7_0606900		0		Pfam:PF00462.19(Glutaredoxin)
PGAL8A_00135500	translation initiation factor IF-2, putative	1	2808	94.168	PRELSG_1141300	PF3D7_0607000		0		Pfam:PF00009.22(GTP_EFTU),Pfam:PF03144.20(GTP_EFTU_D2),Pfam:PF11987.3(IF-2)
PGAL8A_00135600	MYND finger protein, putative	15	1473	24.908	PRELSG_1141200	PF3D7_0607100		0		Pfam:PF01753.13(zf-MYND)
PGAL8A_00135700	RING zinc finger protein, putative	2	1086	9.699	PRELSG_1141100	PF3D7_0607200	5.41999	4		Pfam:PF13639.1(zf-RING_2)
PGAL8A_00135800	uroporphyrinogen III decarboxylase	2	1239	17.669	PRELSG_1141000	PF3D7_0607300	0.954538	0	19	Pfam:PF01208.12(URO-D)
PGAL8A_00135900	G-protein associated signal transduction protein,putative	13	1902	28.711	PRELSG_1140900	PF3D7_0607400		8		Pfam:PF03105.14(SPX),Pfam:PF03124.9(EXS)
PGAL8A_00136000	para-hydroxybenzoate--polyprenyltransferase,putative	1	1374	14.771	PRELSG_1140800	PF3D7_0607500		7		Pfam:PF01040.13(UbiA)
PGAL8A_00136100	spindle assembly abnormal protein 6, putative	5	2379	183.752	PRELSG_1140700	PF3D7_0607600		0
PGAL8A_00136200	conserved Plasmodium protein, unknown function	1	8997	124.782	PRELSG_1140600	PF3D7_0607700		0		Pfam:PF14418.1(OHA)
PGAL8A_00136300	GTP-binding protein, putative	2	1665	24.191	PRELSG_1140500	PF3D7_0607800		0		Pfam:PF01018.17(GTP1_OBG),Pfam:PF01926.18(MMR_HSR1)
PGAL8A_00136400	conserved Plasmodium protein, unknown function	1	2322	54.394	PRELSG_1140400	PF3D7_0607900		1
PGAL8A_00136500	diphthine methyltransferase, putative	12	1026	15.304	PRELSG_1140300	PF3D7_0608000		0		Pfam:PF00400.27(WD40)
PGAL8A_00136600	conserved Plasmodium protein, unknown function	1	3786	42.858	PRELSG_1140200	PF3D7_0608100		1
PGAL8A_00136700	conserved Plasmodium protein, unknown function	4	456	5.486	PRELSG_1140100	PF3D7_0608200		0
PGAL8A_00136800	conserved Plasmodium protein, unknown function	1	3276	13.435	PRELSG_1140000	PF3D7_0608300		0
PGAL8A_00136900	sorting assembly machinery 50 kDa subunit,putative	1	1353	3.064	PRELSG_1139900	PF3D7_0608310		0
PGAL8A_00137000	conserved Plasmodium protein, unknown function	2	306	20.72	PRELSG_1139800	PF3D7_0608400		1
PGAL8A_00137100	proteasome subunit alpha type-2, putative	2	708	999.296	PRELSG_1139700	PF3D7_0608500		0		Pfam:PF00227.21(Proteasome),Pfam:PF10584.4(Proteasome_A_N)
PGAL8A_00137200	conserved Plasmodium protein, unknown function	2	1122	175.278	PRELSG_1139600	PF3D7_0608600		0	23
PGAL8A_00137300	T-complex protein 1 subunit zeta, putative	2	1632	324.332	PRELSG_1139500	PF3D7_0608700		0		Pfam:PF00118.19(Cpn60_TCP1)
PGAL8A_00137400	ornithine aminotransferase, putative	1	1245	35.39	PRELSG_1139400	PF3D7_0608800		0		Pfam:PF00202.16(Aminotran_3)
PGAL8A_00137500	conserved Plasmodium protein, unknown function	2	2544	28.253	PRELSG_1139300	PF3D7_0608900		3
PGAL8A_00137600	conserved Plasmodium protein, unknown function	1	16026	129.033	PRELSG_1139200	PF3D7_0609000		2
PGAL8A_00137700	zinc transporter ZIP1, putative	7	1008	38.469	PRELSG_1139100	PF3D7_0609100		8		Pfam:PF02535.17(Zip)
PGAL8A_00137800	citrate synthase-like protein, putative	2	1287	7.115	PRELSG_1139000	PF3D7_0609200		0		Pfam:PF00285.16(Citrate_synt)
PGAL8A_00137900	conserved Plasmodium protein, unknown function	2	2958	38.064	PRELSG_1138900	PF3D7_0609300		0
PGAL8A_00138000	mitochondrial cardiolipin synthase, putative	1	1602	22.372	PRELSG_1138800	PF3D7_0609400		0		Pfam:PF13091.1(PLDc_2)
PGAL8A_00138100	conserved Plasmodium protein, unknown function	10	3201	9.889	PRELSG_1138700	PF3D7_0609500		0	21
PGAL8A_00138300	conserved Plasmodium protein, unknown function	5	8856	33.963	PRELSG_1138500			3
PGAL8A_00138400	palmitoyltransferase DHHC2, putative	4	855	39.415	PRELSG_1138400	PF3D7_0609800		4		Pfam:PF01529.15(zf-DHHC)
PGAL8A_00138500	conserved Plasmodium protein, unknown function	1	5187	34.049	PRELSG_1138300	PF3D7_0609900		0
PGAL8A_00138600	mitochondrial ribosomal protein L19 precursor,putative	3	951	156.585	PRELSG_1138200	PF3D7_0610000		0		Pfam:PF01245.15(Ribosomal_L19)
PGAL8A_00138700	pre-mRNA-splicing factor SLU7, putative	3	1296	70.986	PRELSG_1138100	PF3D7_0610100		0		Pfam:PF11708.3(Slu7)
PGAL8A_00138800	RNA-binding protein 25, putative	1	2475	177.178	PRELSG_1138000	PF3D7_0610200		0		Pfam:PF00076.17(RRM_1),Pfam:PF01480.12(PWI)
PGAL8A_00138900	histone H3, putative	1	411	180.967	PRELSG_1137900	PF3D7_0610400		0		Pfam:PF00125.19(Histone)
PGAL8A_00139000	peptidyl-tRNA hydrolase PTRHD1, putative	2	372	29.33	PRELSG_1137800	PF3D7_0610500		0		Pfam:PF01981.11(PTH2)
PGAL8A_00139100	calcium-dependent protein kinase 2, putative	3	1521	82.218	PRELSG_1137700	PF3D7_0610600		0		Pfam:PF00069.20(Pkinase),Pfam:PF13499.1(EF-hand_7)
PGAL8A_00139200	conserved Plasmodium protein, unknown function	3	255	38.962	PRELSG_1137600	PF3D7_0610700		0
PGAL8A_00139300	transketolase, putative	1	2010	220.867	PRELSG_1137500	PF3D7_0610800		0		Pfam:PF00456.16(Transketolase_N),Pfam:PF02779.19(Transket_pyr)
PGAL8A_00139400	transcription elongation factor SPT5, putative	1	3597	111.657	PRELSG_1137400	PF3D7_0610900		0		Pfam:PF03439.8(Spt5-NGN),Pfam:PF11942.3(Spt5_N)
PGAL8A_00139500	SNARE associated Golgi protein, putative	3	852	32.156	PRELSG_1137300	PF3D7_0611000		7		Pfam:PF09335.6(SNARE_assoc)
PGAL8A_00139600	succinate dehydrogenase subunit 3, putative	1	252	11.175	PRELSG_1137200	PF3D7_0611100		2
PGAL8A_00139700	transcription factor with AP2 domain(s),putative	3	834	7.687	PRELSG_1137100	PF3D7_0611200		0		Pfam:PF00847.15(AP2)
PGAL8A_00139800	conserved Plasmodium protein, unknown function	3	843	314.434	PRELSG_1137000	PF3D7_0611300		0
PGAL8A_00139900	SWIB/MDM2 domain-containing protein, putative	1	2499	65.714	PRELSG_1136900	PF3D7_0611400		0		Pfam:PF02201.13(SWIB)
PGAL8A_00140000	conserved Plasmodium protein, unknown function	1	1116	128.605	PRELSG_1136800	PF3D7_0611500		0
PGAL8A_00140100	conserved Plasmodium protein, unknown function	1	2145	91.823	PRELSG_1136700	PF3D7_0611600		3
PGAL8A_00140200	60S ribosomal protein L39, putative	3	156	259.492	PRELSG_1136600	PF3D7_0611700		0		Pfam:PF00832.15(Ribosomal_L39)
PGAL8A_00140300	conserved Plasmodium protein, unknown function	5	7950	76.384	PRELSG_1136500	PF3D7_0611800		0
PGAL8A_00140400	lsm12, putative	3	537	52.677	PRELSG_1136400	PF3D7_0611900		0		Pfam:PF09793.4(AD)
PGAL8A_00140500	conserved Plasmodium protein, unknown function	3	258	10.153	PRELSG_1136300	PF3D7_0612000		1
PGAL8A_00140600	eukaryotic translation initiation factor 3subunit L, putative	1	1713	280.061	PRELSG_1136200	PF3D7_0612100		2		Pfam:PF10255.4(Paf67)
PGAL8A_00140700	leucine-rich repeat protein	8	6234	88.744	PRELSG_1136100	PF3D7_0612200		0
PGAL8A_00140800	conserved protein, unknown function	1	354	24.244	PRELSG_1136000	PF3D7_0612300		4	19	Pfam:PF10639.4(UPF0546)
PGAL8A_00140900	conserved Plasmodium protein, unknown function	1	705	19.337	PRELSG_1135900	PF3D7_0612400		0		Pfam:PF01195.14(Pept_tRNA_hydro)
PGAL8A_00141000	conserved Plasmodium protein, unknown function	1	363	14.129	PRELSG_1135800	PF3D7_0612500		0
PGAL8A_00141100	cytoplasmic tRNA 2-thiolation protein 1,putative	1	1254	39.32	PRELSG_1135700	PF3D7_0612600		0		Pfam:PF01171.15(ATP_bind_3)
PGAL8A_00141200	6-cysteine protein, putative	1	1008	36.016	PRELSG_1135600	PF3D7_0612700	2.06059	0	23	Pfam:PF07422.8(s48_45)
PGAL8A_00141300	6-cysteine protein, putative	1	945	6.06	PRELSG_1135500	PF3D7_0612800		1	24	Pfam:PF07422.8(s48_45)
PGAL8A_00141400	nucleolar GTP-binding protein 1, putative	1	2049	49.076	PRELSG_1135400	PF3D7_0612900		0		Pfam:PF06858.9(NOG1),Pfam:PF08155.6(NOGCT)
PGAL8A_00141500	conserved Plasmodium protein, unknown function	6	378	107.404	PRELSG_1135300			0
PGAL8A_00141600	hypothetical protein	1	2769	6.418	PRELSG_1135200			0		Pfam:PF00063.16(Myosin_head)
PGAL8A_00141700	conserved Plasmodium protein, unknown function	4	234	10.623	PRELSG_1135100	PF3D7_0613100		2	20
PGAL8A_00141800	conserved Plasmodium protein, unknown function	2	189	15.025	PRELSG_1135000	PF3D7_0613200		1
PGAL8A_00141900	rhoptry protein ROP14, putative	4	4281	82.948	PRELSG_1134900	PF3D7_0613300		12		Pfam:PF06762.9(LMF1)
PGAL8A_00142000	apicoplast ribosomal protein L18 precursor,putative	2	624	74.731	PRELSG_1134800	PF3D7_0613400		1		Pfam:PF00861.17(Ribosomal_L18p)
PGAL8A_00142100	AP-3 complex subunit beta, putative	1	3183	21.303	PRELSG_1134700	PF3D7_0613500		0		Pfam:PF01602.15(Adaptin_N)
PGAL8A_00142200	conserved Plasmodium protein, unknown function	1	1899	49.448	PRELSG_1134600	PF3D7_0613600		0
PGAL8A_00142300	syntaxin binding protein, putative	1	1851	111.095	PRELSG_1134500	PF3D7_0613700		0		Pfam:PF00995.18(Sec1)
PGAL8A_00142400	transcription factor with AP2 domain(s),putative	1	9648	590.908	PRELSG_1134400	PF3D7_0613800		0		Pfam:PF00847.15(AP2)
PGAL8A_00142500	myosin E, putative	1	4431	29.602	PRELSG_1134300	PF3D7_0613900		0		Pfam:PF00063.16(Myosin_head)
PGAL8A_00142600	thiamin-phosphate pyrophosphorylase, putative	1	1530	22.509	PRELSG_1134200	PF3D7_0614000		0		Pfam:PF02581.12(TMP-TENI)
PGAL8A_00142700	conserved Plasmodium protein, unknown function	1	2562	36.111	PRELSG_1134100	PF3D7_0614100		0		Pfam:PF00630.14(Filamin)
PGAL8A_00142800	transcription factor with AP2 domain(s),putative	1	5313	1.34	PRELSG_1134000			0		Pfam:PF00847.15(AP2)
PGAL8A_00142900	cytosolic Fe-S cluster assembly factor NAR1,putative	1	2568	19.332	PRELSG_1133900	PF3D7_0614200		0		Pfam:PF02906.9(Fe_hyd_lg_C)
PGAL8A_00143000	major facilitator superfamily-relatedtransporter, putative	4	2709	132.011	PRELSG_1133800	PF3D7_0614300		12		Pfam:PF07690.11(MFS_1)
PGAL8A_00143100	conserved Plasmodium protein, unknown function	1	741	50.532	PRELSG_1133700	PF3D7_0614400		0		Pfam:PF05700.6(BCAS2)
PGAL8A_00143200	60S ribosomal protein L19, putative	3	549	633.443	PRELSG_1133600	PF3D7_0614500		0		Pfam:PF01280.15(Ribosomal_L19e)
PGAL8A_00143300	conserved Plasmodium protein, unknown function	1	1668	8.465	PRELSG_1133500	PF3D7_0614600		1
PGAL8A_00143400	conserved Plasmodium protein, unknown function	2	1671	15.528	PRELSG_1133400	PF3D7_0614700		0
PGAL8A_00143500	endonuclease III homologue, putative	1	1155	46.409	PRELSG_1133300	PF3D7_0614800		0	16	Pfam:PF00633.18(HHH),Pfam:PF00730.20(HhH-GPD)
PGAL8A_00143600	conserved Plasmodium protein, unknown function	3	3105	22.824	PRELSG_1133200	PF3D7_0614900		11
PGAL8A_00143700	conserved Plasmodium protein, unknown function	1	414	12.921	PRELSG_1133100	PF3D7_0615000		0
PGAL8A_00143800	enoyl-acyl carrier reductase, putative	1	1173	123.892	PRELSG_1133000	PF3D7_0615100		0	21	Pfam:PF13561.1(adh_short_C2)
PGAL8A_00143900	conserved Plasmodium protein, unknown function	9	1254	19.967	PRELSG_1132900	PF3D7_0615200		0
PGAL8A_00144000	GPI-anchored wall transfer protein 1, putative	1	1983	7.676	PRELSG_1132800	PF3D7_0615300		14	20	Pfam:PF06423.7(GWT1)
PGAL8A_00144100	ribonuclease, putative	8	7923	55.101	PRELSG_1132700	PF3D7_0615400		0		Pfam:PF00773.14(RNB),Pfam:PF08206.6(OB_RNB)
PGAL8A_00144200	cdc2-related protein kinase 5, putative	1	1869	90.34	PRELSG_1132600	PF3D7_0615500		0		Pfam:PF00069.20(Pkinase)
PGAL8A_00144300	conserved Plasmodium protein, unknown function	8	6378	11.447	PRELSG_1132500	PF3D7_0615600		2
PGAL8A_00144400	RNA and export factor binding protein, putative	7	471	28.548	PRELSG_1132400	PF3D7_0615700		0		Pfam:PF00076.17(RRM_1)
PGAL8A_00144500	conserved Plasmodium protein, unknown function	3	3117	33.573	PRELSG_1132300	PF3D7_0615800		0
PGAL8A_00144600	conserved Plasmodium protein, unknown function	1	4611	35.323	PRELSG_1132200	PF3D7_0615900		1		Pfam:PF00481.16(PP2C)
PGAL8A_00144700	pyridoxine kinase, putative	3	939	27.897	PRELSG_1132100	PF3D7_0616000		0		Pfam:PF08543.7(Phos_pyr_kin)
PGAL8A_00144800	conserved Plasmodium protein, unknown function	2	438	18.984	PRELSG_1132000	PF3D7_0616100		0
PGAL8A_00144900	kinetochore protein NDC80, putative	5	1773	182.106	PRELSG_1131900	PF3D7_0616200		0		Pfam:PF03801.8(Ndc80_HEC)
PGAL8A_00145000	conserved Plasmodium protein, unknown function	1	801	71.515	PRELSG_1131800	PF3D7_0616300		0
PGAL8A_00145100	conserved Plasmodium protein, unknown function	1	3717	4.973	PRELSG_1131700	PF3D7_0616400		2
PGAL8A_00145200	hypothetical protein	3	1593	2.331	PRELSG_1131600			1
PGAL8A_00145300	TRAP-like protein, putative	1	3639	1.483	PRELSG_1131500	PF3D7_0616500		1	20	Pfam:PF00092.23(VWA)
PGAL8A_00145400	conserved Plasmodium protein, unknown function	1	1662	43.128	PRELSG_1131400	PF3D7_0616600		0		Pfam:PF15072.1(DUF4539)
PGAL8A_00145500	ras GTPAse, putative	1	1167	10.94	PRELSG_1131300	PF3D7_0616700		0		Pfam:PF00071.17(Ras)
PGAL8A_00145600	malate:quinone oxidoreductase, putative	1	1539	131.373	PRELSG_1131200	PF3D7_0616800		0		Pfam:PF06039.10(Mqo)
PGAL8A_00145700	conserved Plasmodium protein, unknown function	1	3768	17.679	PRELSG_1131100	PF3D7_0616900		0
PGAL8A_00145800	mitochondrial import receptor subunit TOM40,putative	1	1125	243.629	PRELSG_1131000	PF3D7_0617000		0		Pfam:PF01459.17(Porin_3)
PGAL8A_00145900	AP-2 complex subunit alpha, putative	7	3393	151.994	PRELSG_1130900	PF3D7_0617100		2		Pfam:PF01602.15(Adaptin_N)
PGAL8A_00146000	conserved Plasmodium protein, unknown function	4	1347	693.469	PRELSG_1130800	PF3D7_0617200		0
PGAL8A_00146100	conserved Plasmodium protein, unknown function	3	420	9.885	PRELSG_1130700	PF3D7_0617300		0
PGAL8A_00146200	histone H2A, putative	1	402	1872.12	PRELSG_1130600	PF3D7_0617800		0		Pfam:PF00125.19(Histone)
PGAL8A_00146300	histone H3 variant, putative	1	411	1745.74	PRELSG_1130500	PF3D7_0617900		0		Pfam:PF00125.19(Histone)
PGAL8A_00146400	conserved Plasmodium protein, unknown function	1	2361	130.251	PRELSG_1130400	PF3D7_0618000		4
PGAL8A_00146500	conserved Plasmodium protein, unknown function	1	1890	14.488	PRELSG_1130300	PF3D7_0618100		0
PGAL8A_00146600	conserved Plasmodium protein, unknown function	2	606	78.415	PRELSG_1130200	PF3D7_0618200		0
PGAL8A_00146700	60S ribosomal protein L27a, putative	2	447	292.977	PRELSG_1130100	PF3D7_0618300		0		Pfam:PF00828.14(Ribosomal_L18e)
PGAL8A_00146800	conserved Plasmodium membrane protein, unknownfunction	5	1680	1.091	PRELSG_1130000	PF3D7_0618400		9
PGAL8A_00146900	malate dehydrogenase, putative	1	942	120.444	PRELSG_1129900	PF3D7_0618500		0		Pfam:PF00056.18(Ldh_1_N),Pfam:PF02866.13(Ldh_1_C)
PGAL8A_00147000	rhomboid protease ROM10, putative	8	825	13.692	PRELSG_1129800	PF3D7_0618600		6		Pfam:PF01694.17(Rhomboid)
PGAL8A_00147100	trafficking protein particle complex subunit 6A,putative	2	708	30.61	PRELSG_1129700	PF3D7_0618700		1		Pfam:PF04051.11(TRAPP)
PGAL8A_00147200	conserved Plasmodium protein, unknown function	2	2838	3.213	PRELSG_1129600	PF3D7_0618800		2
PGAL8A_00147300	phosphatidylinositolN-acetylglucosaminyltransferase subunit GPI1, putative	10	1986	8.532	PRELSG_1129500			5		Pfam:PF05024.10(Gpi1)
PGAL8A_00147400	conserved Plasmodium protein, unknown function	14	4515	46.404	PRELSG_1129400			0		Pfam:PF09758.4(FPL)
PGAL8A_00147500	conserved Plasmodium protein, unknown function	3	963	3.978	PRELSG_1129300	PF3D7_0619100		1	20
PGAL8A_00147600	conserved Plasmodium protein, unknown function	2	2811	14.871	PRELSG_1129200	PF3D7_0619200		0
PGAL8A_00147700	conserved Plasmodium protein, unknown function	3	9273	32.522	PRELSG_1129100	PF3D7_0619300		0
PGAL8A_00147800	cell division cycle protein 48 homologue,putative	2	2457	493.967				0		Pfam:PF00004.24(AAA),Pfam:PF02359.13(CDC48_N),Pfam:PF02933.12(CDC48_2)
PGAL8A_00147900	acyl-CoA synthetase, putative	1	3957	47.664	PRELSG_1128900	PF3D7_0619500		0		Pfam:PF00501.23(AMP-binding),Pfam:PF02775.16(TPP_enzyme_C),Pfam:PF02776.13(TPP_enzyme_N)
PGAL8A_00148000	conserved Plasmodium protein, unknown function	1	2205	34.238	PRELSG_1128800	PF3D7_0619600		0
PGAL8A_00148100	conserved Plasmodium protein, unknown function	3	1800	15.117	PRELSG_1128700	PF3D7_0619700		0
PGAL8A_00148200	conserved Plasmodium membrane protein, unknownfunction	2	6615	6.803	PRELSG_1128600	PF3D7_0619800		9
PGAL8A_00148300	splicing factor 3A subunit 2, putative	1	696	50.623	PRELSG_1128500	PF3D7_0619900		0		Pfam:PF12874.2(zf-met)
PGAL8A_00148400	conserved Plasmodium protein, unknown function	1	1884	2.923	PRELSG_1128400	PF3D7_0620000		1	21
PGAL8A_00148500	conserved Plasmodium protein, unknown function	2	384	16.655	PRELSG_1128300	PF3D7_0620100		0
PGAL8A_00148600	conserved Plasmodium protein, unknown function	1	771	1.877	PRELSG_1128200	PF3D7_0620200		0	19
PGAL8A_00148700	conserved Plasmodium protein, unknown function	1	2253	2.727	PRELSG_1128100	PF3D7_0620300		0
PGAL8A_00148800	merozoite surface protein 10, putative	1	1230	134.229	PRELSG_1128000	PF3D7_0620400		0	27	Pfam:PF12947.2(EGF_3)
PGAL8A_00148900	cleavage stimulation factor subunit 1, putative	1	1482	61.122	PRELSG_1127900	PF3D7_0620500		0		Pfam:PF00400.27(WD40)
PGAL8A_00149000	conserved Plasmodium protein, unknown function	1	873	10.849	PRELSG_1127800	PF3D7_0620600		0
PGAL8A_00149100	DnaJ protein, putative	1	1071	82.983	PRELSG_1127700	PF3D7_0620700		0		Pfam:PF00226.26(DnaJ),Pfam:PF11875.3(DUF3395)
PGAL8A_00149400	conserved Plasmodium protein, unknown function	1	2439	27.179	PRELSG_1127400	PF3D7_0621000		1
PGAL8A_00149500	conserved Plasmodium protein, unknown function	1	3789	88.701	PRELSG_1127300	PF3D7_0621100		0
PGAL8A_00149600	pyridoxine biosynthesis protein PDX1, putative	1	891	20.615	PRELSG_1127200	PF3D7_0621200		0		Pfam:PF01680.12(SOR_SNZ)
PGAL8A_00149700	mRNA binding Pumilio-homology domain protein,putative	1	1941	9.812	PRELSG_1127100	PF3D7_0621300		0
PGAL8A_00149800	protein SYS1, putative	3	405	6.779	PRELSG_1127000	PF3D7_0621350		4		Pfam:PF09801.4(SYS1)
PGAL8A_00149900	inner membrane complex protein 1j, putative	1	1599	50.859	PRELSG_1126900	PF3D7_0621400		0		Pfam:PF12314.3(IMCp)
PGAL8A_00150000	ribonuclease P/MRP protein subunit RPP1,putative	1	975	18.161	PRELSG_1126800	PF3D7_0621500		0		Pfam:PF01876.11(RNase_P_p30)
PGAL8A_00150200	conserved Plasmodium protein, unknown function	4	4587	18.859	PRELSG_1126600	PF3D7_0621700		0
PGAL8A_00150300	nascent polypeptide-associated complex subunitalpha, putative	3	552	288.252	PRELSG_1126500	PF3D7_0621800		0		Pfam:PF00627.26(UBA),Pfam:PF01849.13(NAC)
PGAL8A_00150400	conserved Plasmodium protein, unknown function	1	2049	55.979	PRELSG_1126400	PF3D7_0621900		0
PGAL8A_00150500	conserved Plasmodium protein, unknown function	3	630	2.372	PRELSG_1126300	PF3D7_0622000		3	19
PGAL8A_00150600	conserved Plasmodium protein, unknown function	1	4179	22.112	PRELSG_1126200	PF3D7_0622100		0
PGAL8A_00150700	radical SAM protein, putative	1	2166	13.528	PRELSG_1126100	PF3D7_0622200		1		Pfam:PF00919.15(UPF0004),Pfam:PF04055.16(Radical_SAM)
PGAL8A_00150800	vacuolar transporter chaperone, putative	4	2208	14.81	PRELSG_1126000	PF3D7_0622300		3		Pfam:PF09359.5(VTC)
PGAL8A_00150900	conserved Plasmodium protein, unknown function	1	375	24.627	PRELSG_1125900	PF3D7_0622400		0
PGAL8A_00151000	RNA methyltransferase, putative	1	1293	11.827	PRELSG_1125800	PF3D7_0622500		0		Pfam:PF04452.9(Methyltrans_RNA)
PGAL8A_00151100	conserved Plasmodium protein, unknown function	4	288	19.166	PRELSG_1125700	PF3D7_0622600		1		Pfam:PF05365.7(UCR_UQCRX_QCR9)
PGAL8A_00151200	conserved Plasmodium membrane protein, unknownfunction	2	1341	7.514	PRELSG_1125600	PF3D7_0622700	5.86724	5
PGAL8A_00151300	leucyl tRNA synthase, putative	1	3864	196.063	PRELSG_1125500	PF3D7_0622800		0		Pfam:PF00133.17(tRNA-synt_1),Pfam:PF08264.8(Anticodon_1),Pfam:PF09334.6(tRNA-synt_1g)
PGAL8A_00151400	transcription factor with AP2 domain(s),putative	1	6537	5.014	PRELSG_1125400	PF3D7_0622900		0
PGAL8A_00151500	chorismate synthase, putative, pseudogene	5	987	0.789	PRELSG_1125300	PF3D7_0623000		0	22
PGAL8A_00151600	nuclear polyadenylated RNA-binding protein NAB2,putative	12	2481	138.165	PRELSG_1125200	PF3D7_0623100		0		Pfam:PF14608.1(zf-CCCH_2)
PGAL8A_00151700	ferredoxin NADP reductase, putative	1	1053	22.695	PRELSG_1125100	PF3D7_0623200	0.925857	0	19	Pfam:PF00175.16(NAD_binding_1)
PGAL8A_00151800	EGF-like membrane protein, putative	4	711	19.506	PRELSG_1125000	PF3D7_0623300		1	24
PGAL8A_00151900	MEI2-like RNA-binding protein, putative	1	1167	23.7	PRELSG_1124900	PF3D7_0623400		0		Pfam:PF04059.7(RRM_2)
PGAL8A_00152000	superoxide dismutase, putative	9	798	29.807	PRELSG_1124800	PF3D7_0623500		0	27	Pfam:PF00081.17(Sod_Fe_N),Pfam:PF02777.13(Sod_Fe_C)
PGAL8A_00152100	transcription or splicing factor-like protein,putative	2	1860	114.11	PRELSG_1124700	PF3D7_0623600		0		Pfam:PF00013.24(KH_1)
PGAL8A_00152200	ATP-dependent RNA helicase SUV3, putative	1	2691	21.53	PRELSG_1124600	PF3D7_0623700		0		Pfam:PF00271.26(Helicase_C),Pfam:PF12513.3(SUV3_C)
PGAL8A_00152300	tyrosine kinase-like protein, putative	1	5265	46.652	PRELSG_1124500	PF3D7_0623800		0		Pfam:PF07714.12(Pkinase_Tyr)
PGAL8A_00152400	ribonuclease H2 subunit A, putative	1	867	35.322	PRELSG_1124400	PF3D7_0623900		0		Pfam:PF01351.13(RNase_HII)
PGAL8A_00152500	hexokinase, putative	1	1470	41.248	PRELSG_1124300	PF3D7_0624000		0		Pfam:PF00349.16(Hexokinase_1),Pfam:PF03727.11(Hexokinase_2)
PGAL8A_00152600	conserved Plasmodium protein, unknown function	2	810	27.076	PRELSG_1124200	PF3D7_0624100		0
PGAL8A_00152700	conserved Plasmodium protein, unknown function	7	834	31.617	PRELSG_1124100	PF3D7_0624200		0
PGAL8A_00152800	conserved Plasmodium protein, unknown function	9	540	8.07	PRELSG_1124000	PF3D7_0624300		0	18	Pfam:PF09717.5(CPW_WPC)
PGAL8A_00152900	conserved Plasmodium protein, unknown function	1	1671	24.979	PRELSG_1123900	PF3D7_0624400		0	21
PGAL8A_00153000	anaphase-promoting complex subunit 11, putative	1	270	23.658	PRELSG_1123800	PF3D7_0624500		0		Pfam:PF12678.2(zf-rbx1)
PGAL8A_00153100	SNF2 helicase, putative	1	7815	528.271	PRELSG_1123700	PF3D7_0624600		0		Pfam:PF00176.18(SNF2_N),Pfam:PF00271.26(Helicase_C),Pfam:PF00628.24(PHD)
PGAL8A_00153200	N-acetylglucosaminylphosphatidylinositoldeacetylase, putative	5	699	10.376	PRELSG_1123600	PF3D7_0624700		2		Pfam:PF02585.12(PIG-L)
PGAL8A_00153300	conserved Plasmodium protein, unknown function	5	1695	7.504	PRELSG_1123500	PF3D7_0624800		0	20
PGAL8A_00153400	GAS8-like protein, putative	11	1326	6.116	PRELSG_1123400	PF3D7_0624900		0		Pfam:PF13851.1(GAS)
PGAL8A_00153500	sphingomyelin synthase 1, putative	4	1389	12.341	PRELSG_1123300			6		Pfam:PF14360.1(PAP2_C)
PGAL8A_00153600	sphingomyelin synthase 2, putative	1	1206	41.817	PRELSG_1123200	PF3D7_0625100		6		Pfam:PF14360.1(PAP2_C)
PGAL8A_00153700	conserved Plasmodium protein, unknown function	1	1110	51.586	PRELSG_1123100	PF3D7_0625200		0
PGAL8A_00153800	DNA polymerase 1, putative	1	3444	28.958	PRELSG_1123000	PF3D7_0625300		0		Pfam:PF00476.15(DNA_pol_A)
PGAL8A_00153900	conserved Plasmodium protein, unknown function	1	1023	38.133	PRELSG_1122900	PF3D7_0625400		0	19
PGAL8A_00154000	conserved Plasmodium protein, unknown function	1	894	9.591	PRELSG_1122800	PF3D7_0625500		4
PGAL8A_00154100	poly(A) polymerase PAP, putative	1	1902	79.69	PRELSG_1122700	PF3D7_0625600		0		Pfam:PF01909.18(NTP_transf_2),Pfam:PF04926.10(PAP_RNA-bind),Pfam:PF04928.12(PAP_central)
PGAL8A_00154200	conserved Plasmodium protein, unknown function	1	282	23.348	PRELSG_1122600	PF3D7_0625700		0
PGAL8A_00154300	conserved Plasmodium protein, unknown function	1	1692	41.517	PRELSG_1122500	PF3D7_0625800		1
PGAL8A_00154400	conserved Plasmodium protein, unknown function	3	936	2.815	PRELSG_1122400	PF3D7_0625900		0
PGAL8A_00154500	conserved Plasmodium protein, unknown function	1	4248	15.72	PRELSG_1122300	PF3D7_0626000		4
PGAL8A_00154600	oxidoreductase, short-chain dehydrogenase family,putative	9	1170	39.359	PRELSG_1122200	PF3D7_0626100		2		Pfam:PF00106.20(adh_short)
PGAL8A_00154700	conserved Plasmodium protein, unknown function	1	1137	11.146	PRELSG_1122100	PF3D7_0626200		0
PGAL8A_00154800	3-oxoacyl-acyl-carrier protein synthase I/II,putative	3	1425	67.006	PRELSG_1122000	PF3D7_0626300		0	20	Pfam:PF00109.21(ketoacyl-synt),Pfam:PF02801.17(Ketoacyl-synt_C)
PGAL8A_00154900	Sec14 domain containing protein	1	2526	27.657	PRELSG_1121900	PF3D7_0626400		0		Pfam:PF00650.15(CRAL_TRIO)
PGAL8A_00155000	conserved Plasmodium protein, unknown function	1	2730	27.083	PRELSG_1121800	PF3D7_0626500		0
PGAL8A_00155100	conserved Plasmodium protein, unknown function	1	435	7.324	PRELSG_1121700	PF3D7_0626600		0
PGAL8A_00155200	conserved Plasmodium protein, unknown function	1	1128	86.113	PRELSG_1121600	PF3D7_0626700		0		Pfam:PF03690.8(UPF0160)
PGAL8A_00155300	pyruvate kinase, putative	3	1536	412.093	PRELSG_1121500	PF3D7_0626800		0		Pfam:PF00224.16(PK),Pfam:PF02887.11(PK_C)
PGAL8A_00155400	mitochondrial ribosomal protein L46 precursor,putative	1	1056	23.234	PRELSG_1121400	PF3D7_0626900		0
PGAL8A_00155500	conserved Plasmodium protein, unknown function	1	345	10.762	PRELSG_1121300	PF3D7_0627000		0
PGAL8A_00155600	ankyrin-repeat protein, putative	1	4605	137.239	PRELSG_1121200	PF3D7_0627100		0		Pfam:PF12796.2(Ank_2)
PGAL8A_00155700	myosin light chain, putative	8	420	8.616	PRELSG_1121100	PF3D7_0627200		0
PGAL8A_00155800	E3 ubiquitin-protein ligase RNF5, putative	1	1566	79.373	PRELSG_1121000	PF3D7_0627300		1		Pfam:PF13923.1(zf-C3HC4_2)
PGAL8A_00155850	transmembrane protein, putative	5	624		PRELSG_1120950			0
PGAL8A_00155900	mitochondrial import inner membrane translocasesubunit TIM22, putative	1	522	44.983	PRELSG_1120900	PF3D7_0627400		1		Pfam:PF02466.14(Tim17)
PGAL8A_00156000	protein DJ-1, putative	3	570	562.3	PRELSG_1120800	PF3D7_0627500		0		Pfam:PF01965.19(DJ-1_PfpI)
PGAL8A_00156100	conserved Plasmodium protein, unknown function	1	1059	59.819	PRELSG_1120700	PF3D7_0627600		0
PGAL8A_00156200	transportin, putative	1	3213	146.777	PRELSG_1120600	PF3D7_0627700		0		Pfam:PF03810.14(IBN_N),Pfam:PF13513.1(HEAT_EZ)
PGAL8A_00156300	acetyl-CoA synthetase, putative	1	2676	173.926				0		Pfam:PF00501.23(AMP-binding),Pfam:PF13193.1(AMP-binding_C)
PGAL8A_00156400	conserved Plasmodium protein, unknown function	3	942	42.787	PRELSG_1120400	PF3D7_0627900		0		Pfam:PF01868.11(UPF0086)
PGAL8A_00156500	6-pyruvoyltetrahydropterin synthase, putative	1	519	12.414	PRELSG_1120300	PF3D7_0628000		0		Pfam:PF01242.14(PTPS)
PGAL8A_00156600	HECT-domain (ubiquitin-transferase), putative	1	26628	109.272				0		Pfam:PF12796.2(Ank_2)
PGAL8A_00156700	protein kinase PK4, putative	1	8733	68.348	PRELSG_1120100	PF3D7_0628200	0.771066	4		Pfam:PF00069.20(Pkinase)
PGAL8A_00156800	choline/ethanolaminephosphotransferase, putative	10	894	58.23	PRELSG_1120000	PF3D7_0628300		7
PGAL8A_00156900	conserved Plasmodium protein, unknown function	8	1011	1.992	PRELSG_1119900	PF3D7_0628400		8		Pfam:PF13367.1(PrsW-protease)
PGAL8A_00157000	conserved Plasmodium protein, unknown function	1	897	14.347	PRELSG_1119800	PF3D7_0628500		0
PGAL8A_00157100	conserved Plasmodium protein, unknown function	5	1149	82.855	PRELSG_1119700	PF3D7_0628600		0
PGAL8A_00157200	conserved Plasmodium protein, unknown function	1	1545	2.052	PRELSG_1119600	PF3D7_0628700		0
PGAL8A_00157300	glutamyl-tRNA(Gln) amidotransferase subunit B,putative	1	2100	30.413	PRELSG_1119500	PF3D7_0628800		2		Pfam:PF02637.13(GatB_Yqey),Pfam:PF02934.10(GatB_N)
PGAL8A_00157400	RAP protein, putative	3	3594	2.863	PRELSG_1119400	PF3D7_0628900		0		Pfam:PF08373.5(RAP)
PGAL8A_00157500	N-acetyltransferase, putative	1	861	18.483	PRELSG_1119300	PF3D7_0629000		0
PGAL8A_00157600	nicotinate phosphoribosyltransferase, putative	1	2376	51.817	PRELSG_1119200	PF3D7_0629100		0		Pfam:PF04095.11(NAPRTase)
PGAL8A_00157700	DnaJ protein, putative	1	1137	242.456	PRELSG_1119100	PF3D7_0629200		0	22	Pfam:PF00226.26(DnaJ),Pfam:PF01556.13(CTDII)
PGAL8A_00157800	phosphatidylcholine-sterol acyltransferase,putative	1	2172	77.187	PRELSG_1119000	PF3D7_0629300		0
PGAL8A_00157900	RNA-binding protein, putative	1	1623	37.151	PRELSG_1118900	PF3D7_0629400		0		Pfam:PF00076.17(RRM_1)
PGAL8A_00158000	amino acid transporter, putative	2	1821	54.689	PRELSG_1118800	PF3D7_0629500		11		Pfam:PF01490.13(Aa_trans)
PGAL8A_00158100	conserved Plasmodium protein, unknown function	2	744	17.9	PRELSG_1118700	PF3D7_0629600		0		Pfam:PF00076.17(RRM_1),Pfam:PF12923.2(RRP7)
PGAL8A_00158200	SET domain protein, putative	6	19224	123.082	PRELSG_1118600	PF3D7_0629700		0		Pfam:PF00856.23(SET),Pfam:PF13771.1(zf-HC5HC2H)
PGAL8A_00158300	cullin-like protein, putative	2	2997	67.827	PRELSG_1118500	PF3D7_0629800		0		Pfam:PF00888.17(Cullin),Pfam:PF10557.4(Cullin_Nedd8)
PGAL8A_00158400	sec14-like cytosolic factor orphosphatidylinositol/phosphatidylcholine transfer protein,putative	3	981	107.898	PRELSG_1118400	PF3D7_0629900		0		Pfam:PF00650.15(CRAL_TRIO)
PGAL8A_00158500	CPW-WPC family protein, putative	8	624	27.684	PRELSG_1118300	PF3D7_0630000		0
PGAL8A_00158600	conserved Plasmodium protein, unknown function	1	1779	3.582	PRELSG_1118200	PF3D7_0630100		0
PGAL8A_00158700	secreted ookinete protein, putative	5	402	26.006	PRELSG_1118100	PF3D7_0630200		0	23
PGAL8A_00158800	DNA polymerase epsilon catalytic subunit A,putative	4	8211	59.505	PRELSG_1118000	PF3D7_0630300		1		Pfam:PF03104.14(DNA_pol_B_exo1)
PGAL8A_00158900	conserved Plasmodium protein, unknown function	1	1098	22.016	PRELSG_1117900	PF3D7_0630400		2
PGAL8A_00159000	ribosome biogenesis protein YTM1, putative	1	1362	11.54	PRELSG_1117800	PF3D7_0630500		0		Pfam:PF00400.27(WD40),Pfam:PF08154.7(NLE)
PGAL8A_00159100	conserved Plasmodium protein, unknown function	2	2625	51.337	PRELSG_1117700	PF3D7_0630600		0		Pfam:PF13898.1(DUF4205)
PGAL8A_00159200	bifunctional methylenetetrahydrofolatedehydrogenase/cyclohydrolase, putative	1	1851	4.331	PRELSG_1117600	PF3D7_0630700		1		Pfam:PF00763.18(THF_DHG_CYH),Pfam:PF02882.14(THF_DHG_CYH_C)
PGAL8A_00159300	SNF1-related protein kinase catalytic subunitalpha, putative	2	2007	8.827	PRELSG_1117500			0		Pfam:PF00069.20(Pkinase)
PGAL8A_00159400	conserved Plasmodium protein, unknown function	10	1062	10.289	PRELSG_1117400	PF3D7_0630800		0		Pfam:PF13868.1(Trichoplein)
PGAL8A_00159500	ATP-dependent RNA helicase HAS1, putative	2	1842	48.34	PRELSG_1117300	PF3D7_0630900		0		Pfam:PF00270.24(DEAD),Pfam:PF00271.26(Helicase_C),Pfam:PF13959.1(DUF4217)
PGAL8A_00159600	tetratricopeptide repeat protein, putative	1	837	83.759	PRELSG_1117200			0		Pfam:PF13174.1(TPR_6),Pfam:PF13181.1(TPR_8),Pfam:PF13414.1(TPR_11)
PGAL8A_00159700	conserved Plasmodium protein, unknown function	2	5031	37.439	PRELSG_1117100	PF3D7_1353300		3
PGAL8A_00159800	Ran-binding protein, putative	1	3315	56.143	PRELSG_1117000	PF3D7_1353400		0		Pfam:PF14259.1(RRM_6)
PGAL8A_00159900	RNA polymerase II transcription factor B subunit4, putative	1	972	27.241	PRELSG_1116900	PF3D7_1353500		0		Pfam:PF03850.9(Tfb4)
PGAL8A_00160000	ER lumen protein retaining receptor, putative	3	666	32.181	PRELSG_1116800	PF3D7_1353600		5		Pfam:PF00810.13(ER_lumen_recept)
PGAL8A_00160100	reactive oxygen species modulator 1, putative	1	519	17.446	PRELSG_1116700	PF3D7_1353700		2		Pfam:PF10247.4(Romo1)
PGAL8A_00160200	proteasome subunit alpha type-4, putative	2	741	71.52	PRELSG_1116600	PF3D7_1353800		0		Pfam:PF00227.21(Proteasome),Pfam:PF10584.4(Proteasome_A_N)
PGAL8A_00160300	proteasome subunit alpha type-7, putative	4	726	408.373	PRELSG_1116500	PF3D7_1353900		0		Pfam:PF00227.21(Proteasome),Pfam:PF10584.4(Proteasome_A_N)
PGAL8A_00160400	conserved Plasmodium protein, unknown function	1	1893	11.104	PRELSG_1116400	PF3D7_1354000		0		Pfam:PF03179.10(V-ATPase_G)
PGAL8A_00160500	conserved Plasmodium protein, unknown function	1	897	9.261	PRELSG_1116300	PF3D7_1354100		0
PGAL8A_00160600	inositol-polyphosphate 5-phosphatase, putative	1	2313	23.599	PRELSG_1116200	PF3D7_1354200		3		Pfam:PF02383.13(Syja_N)
PGAL8A_00160700	large subunit rRNA methyltransferase, putative	2	2976	50.849	PRELSG_1116100	PF3D7_1354300		0		Pfam:PF01728.14(FtsJ),Pfam:PF07780.7(Spb1_C),Pfam:PF11861.3(DUF3381)
PGAL8A_00160800	V-type proton ATPase 21 kDa proteolipid subunit,putative	5	546	44.288	PRELSG_1116000	PF3D7_1354400		4		Pfam:PF00137.16(ATP-synt_C)
PGAL8A_00160900	adenylosuccinate synthetase, putative	2	1329	71.668	PRELSG_1115900	PF3D7_1354500		0		Pfam:PF00709.16(Adenylsucc_synt)
PGAL8A_00161000	60S ribosomal protein L7-2, putative	3	759	9.193	PRELSG_1115800	PF3D7_1354600		0
PGAL8A_00161100	conserved Plasmodium protein, unknown function	1	1026	1.579	PRELSG_1115700	PF3D7_1354700		0
PGAL8A_00161200	metacaspase 1, putative	1	1710	25.407	PRELSG_1115600	PF3D7_1354800		0		Pfam:PF00656.17(Peptidase_C14)
PGAL8A_00161300	conserved Plasmodium protein, unknown function	1	1698	82.283	PRELSG_1115500	PF3D7_1354900		0
PGAL8A_00161400	DNA replication licensing factor MCM6, putative	1	2793	383.964	PRELSG_1115400	PF3D7_1355100		0		Pfam:PF00493.18(MCM),Pfam:PF14551.1(MCM_N)
PGAL8A_00161500	RAP protein, putative	1	2832	16.902	PRELSG_1115300	PF3D7_1355200		0		Pfam:PF08373.5(RAP)
PGAL8A_00161600	histone-lysine N-methyltransferase, putative	1	1527	11.122	PRELSG_1115200	PF3D7_1355300		0		Pfam:PF00856.23(SET),Pfam:PF01753.13(zf-MYND)
PGAL8A_00161700	hypothetical protein	1	2496	1.538	PRELSG_1115150			0		Pfam:PF01936.13(NYN)
PGAL8A_00161900	serine/threonine protein phosphatase, putative	1	2031	42.853	PRELSG_1115000	PF3D7_1355500		0		Pfam:PF00149.23(Metallophos),Pfam:PF07719.12(TPR_2),Pfam:PF08321.7(PPP5),Pfam:PF13414.1(TPR_11)
PGAL8A_00162000	conserved Plasmodium protein, unknown function	2	1734	14.014	PRELSG_1114900	PF3D7_1355600		0
PGAL8A_00162100	NLI interacting factor-like phosphatase,putative	1	4254	47.395	PRELSG_1114800	PF3D7_1355700		0		Pfam:PF03031.13(NIF)
PGAL8A_00162200	splicing factor 3B subunit 5, putative	4	267	29.816	PRELSG_1114700	PF3D7_1355800		0		Pfam:PF07189.6(SF3b10)
PGAL8A_00162300	conserved Plasmodium protein, unknown function	1	1122	20.83	PRELSG_1114600	PF3D7_1355900		0		Pfam:PF05773.17(RWD),Pfam:PF06544.7(DUF1115)
PGAL8A_00162400	conserved Plasmodium protein, unknown function	1	4602	10.624	PRELSG_1114500	PF3D7_1356000		0
PGAL8A_00162500	conserved Plasmodium protein, unknown function	1	2895	142.186	PRELSG_1114400	PF3D7_1356100		0
PGAL8A_00162600	mitochondrial import inner membrane translocasesubunit TIM23, putative	2	504	26.237	PRELSG_1114300	PF3D7_1356200		2		Pfam:PF02466.14(Tim17)
PGAL8A_00162700	ubiquitin-conjugating enzyme, putative	7	609	361.333	PRELSG_1114200	PF3D7_1356300		0		Pfam:PF00179.21(UQ_con),Pfam:PF00627.26(UBA)
PGAL8A_00162800	phosphatase 2A regulatory subunit-relatedprotein, putative	1	2892	44.982	PRELSG_1114100	PF3D7_1356400		0
PGAL8A_00162900	conserved Plasmodium protein, unknown function	2	588	8.361	PRELSG_1114000	PF3D7_1356500		4
PGAL8A_00163000	regulator of chromosome condensation, putative	1	1440	27.768	PRELSG_1113900	PF3D7_1356600		0		Pfam:PF00415.13(RCC1),Pfam:PF13540.1(RCC1_2)
PGAL8A_00163100	DnaJ protein, putative	7	606	7.568	PRELSG_1113800	PF3D7_1356700		1		Pfam:PF00226.26(DnaJ)
PGAL8A_00163200	serine/threonine protein kinase, putative	1	11751	162.862	PRELSG_1113700	PF3D7_1356800		0		Pfam:PF00069.20(Pkinase)
PGAL8A_00163300	protein kinase 5, putative	5	867	126.625	PRELSG_1113600	PF3D7_1356900		0		Pfam:PF00069.20(Pkinase)
PGAL8A_00163400	elongation factor 1-alpha, putative	1	859	4724.69				0
PGAL8A_00163500	elongation factor 1-alpha, putative	1	1293	4104.31				0		Pfam:PF00009.22(GTP_EFTU),Pfam:PF03143.12(GTP_EFTU_D3),Pfam:PF03144.20(GTP_EFTU_D2)
PGAL8A_00163600	elongation factor 1-alpha, putative	7	1710	43.312	PRELSG_1113500	PF3D7_1357200		0	18	Pfam:PF00749.16(tRNA-synt_1c)
PGAL8A_00163700	dynein light chain, putative	1	369	7.227	PRELSG_1113400	PF3D7_1357300		0		Pfam:PF01221.13(Dynein_light)
PGAL8A_00163800	conserved Plasmodium protein, unknown function	1	2991	25.63	PRELSG_1113300	PF3D7_1357400		0
PGAL8A_00163900	DNA helicase, putative	1	2529	31.46	PRELSG_1113200	PF3D7_1357500		0		Pfam:PF00176.18(SNF2_N),Pfam:PF00271.26(Helicase_C)
PGAL8A_00164000	conserved Plasmodium protein, unknown function	1	57	33.122				0
PGAL8A_00164100	U3 snoRNA-associated small subunit rRNAprocessing, putative	4	3642	39.926	PRELSG_1113000	PF3D7_1357700		0		Pfam:PF04192.7(Utp21)
PGAL8A_00164200	T-complex protein 1 subunit delta, putative	3	1590	241.703	PRELSG_1112900	PF3D7_1357800		0		Pfam:PF00118.19(Cpn60_TCP1)
PGAL8A_00164300	pyrroline-5-carboxylate reductase, putative	6	786	31.846				0		Pfam:PF03807.12(F420_oxidored),Pfam:PF14748.1(P5CR_dimer)
PGAL8A_00164400	pyrroline-5-carboxylate reductase, putative	6	777	33.884				0		Pfam:PF03807.12(F420_oxidored),Pfam:PF14748.1(P5CR_dimer)
PGAL8A_00164500	patatin-like phospholipase, putative	2	5844	46.061	PRELSG_1112600	PF3D7_1358000		0		Pfam:PF01734.17(Patatin)
PGAL8A_00164600	small subunit rRNA processing factor, putative	1	2265	57.041	PRELSG_1112500	PF3D7_1358100		0		Pfam:PF04000.10(Sas10_Utp3),Pfam:PF09368.5(Sas10)
PGAL8A_00164700	conserved Plasmodium protein, unknown function	2	4419	22.118	PRELSG_1112400	PF3D7_1358200		2
PGAL8A_00164800	rhomboid protease ROM7, putative	1	993	20.795	PRELSG_1112300	PF3D7_1358300		5	19	Pfam:PF01694.17(Rhomboid)
PGAL8A_00164900	conserved Plasmodium protein, unknown function	3	399	21.707	PRELSG_1112200	PF3D7_1358400		2
PGAL8A_00165000	zinc finger protein, putative	1	1692	71.477	PRELSG_1112100	PF3D7_1358500		0		Pfam:PF03367.8(zf-ZPR1)
PGAL8A_00165100	zinc finger protein, putative	1	2625	66.168	PRELSG_1112000	PF3D7_1358600		0
PGAL8A_00165200	HVA22-like protein, putative	1	468	22.171	PRELSG_1111900	PF3D7_1358700		3		Pfam:PF03134.14(TB2_DP1_HVA22)
PGAL8A_00165250	5'-AMP-activated protein kinase subunit beta-1,putative	7	714		PRELSG_1111850			0
PGAL8A_00165300	40S ribosomal protein S15, putative	1	456	879.215	PRELSG_1111800	PF3D7_1358800		0		Pfam:PF00312.17(Ribosomal_S15),Pfam:PF08069.7(Ribosomal_S13_N)
PGAL8A_00165400	GTP-binding protein, putative	15	1092	16.751	PRELSG_1111700	PF3D7_1358900		0		Pfam:PF01926.18(MMR_HSR1),Pfam:PF02824.16(TGS)
PGAL8A_00165500	conserved Plasmodium protein, unknown function	1	8598	16.028	PRELSG_1111600	PF3D7_1359000		2
PGAL8A_00165600	riboflavin kinase / FAD synthase family protein,putative	1	1800	9.995	PRELSG_1111500	PF3D7_1359100		0		Pfam:PF01687.12(Flavokinase)
PGAL8A_00165700	high mobility group protein B4, putative	11	747	25.105	PRELSG_1111400	PF3D7_1359200		0		Pfam:PF00808.18(CBFD_NFYB_HMF),Pfam:PF09011.5(HMG_box_2)
PGAL8A_00165800	exosome complex exonuclease RRP44, putative	1	2982	69.221	PRELSG_1111300	PF3D7_1359300		0		Pfam:PF00773.14(RNB)
PGAL8A_00165900	CUGBP Elav-like family member 1, putative	2	1536	811.607	PRELSG_1111200	PF3D7_1359400		0		Pfam:PF00076.17(RRM_1),Pfam:PF00397.21(WW)
PGAL8A_00166000	conserved Plasmodium protein, unknown function	1	732	6.126	PRELSG_1111100	PF3D7_1359500		0
PGAL8A_00166100	conserved Plasmodium protein, unknown function	1	5592	249.757	PRELSG_1111000	PF3D7_1359600		0
PGAL8A_00166200	conserved Plasmodium protein, unknown function	1	11865	6.91	PRELSG_1110900	PF3D7_1359700		0
PGAL8A_00166300	ADP-ribosylation factor, putative	3	615	14.428	PRELSG_1110800	PF3D7_1359800		0		Pfam:PF00025.16(Arf)
PGAL8A_00166400	conserved Plasmodium protein, unknown function	1	5922	68.43	PRELSG_1110700	PF3D7_1359900		4		Pfam:PF05990.7(DUF900)
PGAL8A_00166500	conserved Plasmodium protein, unknown function	1	531	35.925	PRELSG_1110600	PF3D7_1360000	8.66109	1
PGAL8A_00166600	RNA-binding protein, putative	4	543	56.311	PRELSG_1110500	PF3D7_1360100		0		Pfam:PF00076.17(RRM_1)
PGAL8A_00166700	ER membrane protein complex subunit 3, putative	7	774	29.352	PRELSG_1110400	PF3D7_1360200		3		Pfam:PF01956.11(DUF106)
PGAL8A_00166800	conserved Plasmodium protein, unknown function	1	1011	4.676	PRELSG_1110300	PF3D7_1360300		1	19
PGAL8A_00166900	conserved Plasmodium protein, unknown function	1	1155	18.682	PRELSG_1110200	PF3D7_1360400		0
PGAL8A_00167000	guanylyl cyclase beta, putative	14	9372	6.98	PRELSG_1110100	PF3D7_1360500		22		Pfam:PF00122.15(E1-E2_ATPase),Pfam:PF00211.15(Guanylate_cyc)
PGAL8A_00167100	E3 SUMO-protein ligase PIAS, putative	5	5004	80.972	PRELSG_1110000	PF3D7_1360700		0		Pfam:PF02891.15(zf-MIZ)
PGAL8A_00167200	falcilysin, putative	1	3444	542.553	PRELSG_1109900	PF3D7_1360800		0		Pfam:PF00675.15(Peptidase_M16),Pfam:PF05193.16(Peptidase_M16_C),Pfam:PF08367.6(M16C_assoc)
PGAL8A_00167300	polyadenylate-binding protein, putative	9	1170	260.313	PRELSG_1109800	PF3D7_1360900		0		Pfam:PF00076.17(RRM_1)
PGAL8A_00167400	protein arginine N-methyltransferase 5, putative	1	1953	20.139	PRELSG_1109700	PF3D7_1361000		0		Pfam:PF05185.11(PRMT5)
PGAL8A_00167500	protein transport protein Sec24A, putative	5	2718	192.786	PRELSG_1109600	PF3D7_1361100		0		Pfam:PF00626.17(Gelsolin),Pfam:PF04810.10(zf-Sec23_Sec24),Pfam:PF04811.10(Sec23_trunk),Pfam:PF04815.10(Sec23_helical),Pfam:PF08033.7(Sec23_BS)
PGAL8A_00167600	conserved Plasmodium protein, unknown function	6	5562	60.957	PRELSG_1109500	PF3D7_1361200		0
PGAL8A_00167700	conserved Plasmodium protein, unknown function	10	747	6.424	PRELSG_1109400	PF3D7_1361300		5
PGAL8A_00167800	actin-depolymerizing factor 2, putative	2	432	6.517	PRELSG_1109300	PF3D7_1361400		0		Pfam:PF00241.15(Cofilin_ADF)
PGAL8A_00167900	conserved Plasmodium protein, unknown function	12	1092	9.977	PRELSG_1109200	PF3D7_1361500		0		Pfam:PF00169.24(PH),Pfam:PF05708.7(DUF830)
PGAL8A_00168000	iron-sulfur assembly protein, putative	1	399	24.013	PRELSG_1109100	PF3D7_1361600		0		Pfam:PF04384.8(Fe-S_assembly)
PGAL8A_00168100	cytochrome c oxidase subunit 2, putative	2	684	42.61	PRELSG_1109000	PF3D7_1361700		1
PGAL8A_00168200	conserved Plasmodium protein, unknown function	2	7818	94.098	PRELSG_1108900	PF3D7_1361800		0
PGAL8A_00168300	proliferating cell nuclear antigen 1, putative	1	825	400.36	PRELSG_1108800	PF3D7_1361900		0		Pfam:PF00705.13(PCNA_N),Pfam:PF02747.10(PCNA_C)
PGAL8A_00168350	acyl CoA:diacylglycerol acyltransferase,putative	10	1014	2.048	PRELSG_1108700			6		Pfam:PF03062.14(MBOAT)
PGAL8A_00168400	conserved Plasmodium protein, unknown function	1	600	55.131	PRELSG_1108600	PF3D7_1362000		1
PGAL8A_00168500	14-3-3 protein, putative	7	822	2.335	PRELSG_1108500	PF3D7_1362100		0		Pfam:PF00244.15(14-3-3)
PGAL8A_00168600	RuvB-like helicase 3, putative	1	1449	144.36	PRELSG_1108400	PF3D7_1362200		0		Pfam:PF06068.8(TIP49)
PGAL8A_00168700	conserved protein, unknown function	1	567	40.623	PRELSG_1108300	PF3D7_1362300		2		Pfam:PF01956.11(DUF106)
PGAL8A_00168800	calpain, putative	1	6156	33.449	PRELSG_1108200	PF3D7_1362400		0		Pfam:PF00648.16(Peptidase_C2),Pfam:PF01067.17(Calpain_III)
PGAL8A_00168900	exonuclease, putative	2	2130	6.389	PRELSG_1108100	PF3D7_1362500		0		Pfam:PF01612.15(DNA_pol_A_exo1)
PGAL8A_00169000	conserved Plasmodium protein, unknown function	3	792	40.504	PRELSG_1108000	PF3D7_1362600		0
PGAL8A_00169100	conserved Plasmodium protein, unknown function	1	4287	104.341	PRELSG_1107900			0
PGAL8A_00169200	conserved Plasmodium protein, unknown function	2	5946	4.501	PRELSG_1107800	PF3D7_1362800		2
PGAL8A_00169300	conserved Plasmodium protein, unknown function	2	4425	13.6	PRELSG_1107700	PF3D7_1362900		0
PGAL8A_00169400	conserved Plasmodium protein, unknown function	1	2964	5.433	PRELSG_1107600	PF3D7_1363000		0
PGAL8A_00169500	conserved Plasmodium protein, unknown function	2	3003	44.799	PRELSG_1107500	PF3D7_1363100		0
PGAL8A_00169600	bifunctional polynucleotide phosphatase/kinase,putative	2	1389	32.117	PRELSG_1107400	PF3D7_1363200		0		Pfam:PF08645.6(PNK3P),Pfam:PF13671.1(AAA_33)
PGAL8A_00169700	50S ribosomal protein L9, mitochondrial,putative	2	756	33.547	PRELSG_1107300	PF3D7_1363300		0		Pfam:PF01281.14(Ribosomal_L9_N)
PGAL8A_00169800	polyubiquitin binding protein, putative	2	2601	18.736	PRELSG_1107200	PF3D7_1363400		0		Pfam:PF00400.27(WD40),Pfam:PF08324.6(PUL),Pfam:PF09070.6(PFU)
PGAL8A_00169900	DNase I-like protein, putative	3	2211	24.393	PRELSG_1107100	PF3D7_1363500		0		Pfam:PF03372.18(Exo_endo_phos)
PGAL8A_00170000	conserved Plasmodium protein, unknown function	1	5601	1.437				0
PGAL8A_00170100	conserved Plasmodium protein, unknown function	1	681	29.756	PRELSG_1106900	PF3D7_1363600		0
PGAL8A_00170200	conserved Plasmodium protein, unknown function	1	1965	50.041	PRELSG_1106800	PF3D7_1363700		0	18	Pfam:PF00218.16(IGPS)
PGAL8A_00170300	nuclear fusion protein, putative	12	1929	6.92	PRELSG_1106700	PF3D7_1363800		2
PGAL8A_00170400	conserved Plasmodium protein, unknown function	1	543	9.721	PRELSG_1106600			3		Pfam:PF02453.12(Reticulon)
PGAL8A_00170500	conserved Plasmodium protein, unknown function	1	2289	36.975	PRELSG_1106500	PF3D7_1364000		0
PGAL8A_00170600	cysteine-rich surface protein, putative	1	2493	44.359	PRELSG_1106400	PF3D7_1364100		0	22
PGAL8A_00170700	conserved Plasmodium protein, unknown function	1	5088	78.219	PRELSG_1106300	PF3D7_1364200		0
PGAL8A_00170800	pre-mRNA-splicing factor ATP-dependent RNAhelicase PRP16, putative	1	3303	37.699	PRELSG_1106200	PF3D7_1364300		0		Pfam:PF00270.24(DEAD),Pfam:PF00271.26(Helicase_C),Pfam:PF04408.18(HA2),Pfam:PF07717.11(OB_NTP_bind)
PGAL8A_00170900	conserved Plasmodium protein, unknown function	1	7698	24.734	PRELSG_1106100	PF3D7_1364400		4
PGAL8A_00171000	exosome complex component RRP45, putative	1	1491	38.689	PRELSG_1106000	PF3D7_1364500		0		Pfam:PF01138.16(RNase_PH),Pfam:PF03725.10(RNase_PH_C)
PGAL8A_00171100	aldehyde reductase, putative	1	2388	29.707	PRELSG_1105900	PF3D7_1364600		0	18	Pfam:PF00248.16(Aldo_ket_red)
PGAL8A_00171200	conserved Plasmodium protein, unknown function	1	1278	5.134	PRELSG_1105800	PF3D7_1364700		0		Pfam:PF00400.27(WD40)
PGAL8A_00171300	DNA-directed RNA polymerases I, II, and IIIsubunit RPABC1, putative	7	618	51.094	PRELSG_1105700	PF3D7_1364800		0		Pfam:PF01191.14(RNA_pol_Rpb5_C),Pfam:PF03871.9(RNA_pol_Rpb5_N)
PGAL8A_00171400	ferrochelatase, putative	4	1053	13.21	PRELSG_1105600	PF3D7_1364900		0		Pfam:PF00762.14(Ferrochelatase)
PGAL8A_00171500	conserved Plasmodium protein, unknown function	1	894	46.468	PRELSG_1105500	PF3D7_1365000		0		Pfam:PF09745.4(DUF2040)
PGAL8A_00171600	mitochondrial ribosomal protein S17 precursor,putative	3	348	34.744	PRELSG_1105400	PF3D7_1365100		0		Pfam:PF00366.15(Ribosomal_S17)
PGAL8A_00171700	conserved Plasmodium protein, unknown function	1	156	40.139	PRELSG_1105300	PF3D7_1365200		1
PGAL8A_00171800	conserved Plasmodium protein, unknown function	1	1710	18.088	PRELSG_1105200	PF3D7_1365300		0
PGAL8A_00171900	ubiquitin-activating enzyme, putative	1	1554	7.269	PRELSG_1105100	PF3D7_1365400		0		Pfam:PF00899.16(ThiF),Pfam:PF05237.8(MoeZ_MoeB)
PGAL8A_00172000	aminomethyltransferase, mitochondrial, putative	2	1197	26.544	PRELSG_1105000	PF3D7_1365500		0		Pfam:PF01571.16(GCV_T),Pfam:PF08669.6(GCV_T_C)
PGAL8A_00172100	DNA topoisomerase VI, b subunit, putative	8	1635	7.712	PRELSG_1104900	PF3D7_1365600		0		Pfam:PF13589.1(HATPase_c_3)
PGAL8A_00172200	SNARE associated Golgi protein, putative	3	1206	55.215	PRELSG_1104800	PF3D7_1365700		7		Pfam:PF09335.6(SNARE_assoc)
PGAL8A_00172300	conserved Plasmodium protein, unknown function	3	888	48.563	PRELSG_1104700	PF3D7_1365800		0
PGAL8A_00172400	ubiquitin-60S ribosomal protein L40, putative	2	387	736.54	PRELSG_1104600	PF3D7_1365900		0		Pfam:PF00240.18(ubiquitin),Pfam:PF01020.12(Ribosomal_L40e)
PGAL8A_00172500	conserved Plasmodium protein, unknown function	1	264	11.889	PRELSG_1104500	PF3D7_1366000		0
PGAL8A_00172600	conserved Plasmodium protein, unknown function	2	384	15.938	PRELSG_1104400	PF3D7_1366100		0
PGAL8A_00172700	conserved Plasmodium protein, unknown function	1	444	19.489	PRELSG_1104300	PF3D7_1366200		0
PGAL8A_00172800	conserved Plasmodium protein, unknown function	4	11304	107.589	PRELSG_1104200	PF3D7_1366300		0
PGAL8A_00172900	rhoptry protein RHOP148, putative	1	2574	20.656	PRELSG_1104100	PF3D7_1366400		0		Pfam:PF04417.7(DUF501)
PGAL8A_00173000	nucleoside diphosphate kinase, putative	1	432	137.645	PRELSG_1104000	PF3D7_1366500		0		Pfam:PF00334.14(NDK)
PGAL8A_00173100	signal recognition particle receptor alphasubunit, putative	1	1590	78.254	PRELSG_1103900	PF3D7_1366600		0		Pfam:PF00448.17(SRP54),Pfam:PF02881.14(SRP54_N),Pfam:PF04086.8(SRP-alpha_N)
PGAL8A_00173200	conserved Plasmodium protein, unknown function	1	852	7.617	PRELSG_1103800	PF3D7_1366700		0
PGAL8A_00173300	phosphatidylserine synthase I, putative	10	1119	16.81	PRELSG_1103700	PF3D7_1366800		8		Pfam:PF03034.10(PSS)
PGAL8A_00173400	conserved Plasmodium protein, unknown function	3	1914	1157.75	PRELSG_1103600	PF3D7_1366900		0
PGAL8A_00173500	suppressor of kinetochore protein 1, putative	5	489	104.725	PRELSG_1103500	PF3D7_1367000		0		Pfam:PF01466.14(Skp1),Pfam:PF03931.10(Skp1_POZ)
PGAL8A_00173600	U1 small nuclear ribonucleoprotein, putative	1	1206	155.027	PRELSG_1103400	PF3D7_1367100		0		Pfam:PF00076.17(RRM_1),Pfam:PF12220.3(U1snRNP70_N)
PGAL8A_00173700	conserved Plasmodium protein, unknown function	3	1098	6.885	PRELSG_1103300	PF3D7_1367200		1		Pfam:PF14769.1(CLAMP)
PGAL8A_00173800	conserved Plasmodium protein, unknown function	4	996	12.732	PRELSG_1103200	PF3D7_1367300		1	25
PGAL8A_00173900	conserved Plasmodium protein, unknown function	1	3093	25.197	PRELSG_1103100	PF3D7_1367400		0
PGAL8A_00174000	NADH-cytochrome b5 reductase, putative	2	987	22.755	PRELSG_0010900	PF3D7_1367500		0		Pfam:PF00175.16(NAD_binding_1),Pfam:PF00970.19(FAD_binding_6)
PGAL8A_00174100	ribosome biogenesis protein MRT4, putative	3	672	16.728	PRELSG_0010800	PF3D7_1367600		0		Pfam:PF00466.15(Ribosomal_L10)
PGAL8A_00174200	alanine--tRNA ligase, putative	1	3624	76.904	PRELSG_0010700	PF3D7_1367700		0	17	Pfam:PF01411.14(tRNA-synt_2c),Pfam:PF07973.9(tRNA_SAD)
PGAL8A_00174300	secreted ookinete protein, putative	1	2706	2.773	PRELSG_0010500	PF3D7_1367800		0	24
PGAL8A_00174400	conserved Plasmodium protein, unknown function	1	2238	4.489	PRELSG_0010400	PF3D7_1367900		0
PGAL8A_00174500	conserved Plasmodium protein, unknown function	4	378	8.387	PRELSG_0010300	PF3D7_1368000		0	23
PGAL8A_00174600	26S proteasome regulatory subunit RPN11,putative	3	936	306.405	PRELSG_0010200	PF3D7_1368100		0		Pfam:PF01398.16(JAB),Pfam:PF13012.1(MitMem_reg)
PGAL8A_00174700	ABC transporter E family member 1, putative	2	1860	67.487	PRELSG_0010100	PF3D7_1368200		0		Pfam:PF00005.22(ABC_tran),Pfam:PF00037.22(Fer4),Pfam:PF04068.10(RLI)
PGAL8A_00174800	conserved Plasmodium protein, unknown function	6	687	32.393	PRELSG_0010000	PF3D7_1368300		0
PGAL8A_00174900	conserved Plasmodium protein, unknown function	6	912	104.473	PRELSG_0009900	PF3D7_1368400		0		Pfam:PF00687.16(Ribosomal_L1)
PGAL8A_00175000	conserved Plasmodium protein, unknown function	1	2364	14.745	PRELSG_0009800	PF3D7_1368500		0
PGAL8A_00175100	mitochondrial import inner membrane translocasesubunit TIM9, putative	1	279	7.81	PRELSG_0009700	PF3D7_1368600		0		Pfam:PF02953.10(zf-Tim10_DDP)
PGAL8A_00175200	mitochondrial carrier protein, putative	1	1443	23.605	PRELSG_0009600	PF3D7_1368700		3		Pfam:PF00153.22(Mito_carr)
PGAL8A_00175300	DNA repair endonuclease, putative	1	4338	13.628	PRELSG_0009500	PF3D7_1368800		0		Pfam:PF02732.10(ERCC4)
PGAL8A_00175400	conserved Plasmodium protein, unknown function	3	1263	88.256	PRELSG_0009400	PF3D7_1368900		0
PGAL8A_00175500	glycosylphosphatidylinositol anchor attachment 1protein, putative	5	2262	12.819	PRELSG_0009300	PF3D7_1369000		8		Pfam:PF04114.9(Gaa1)
PGAL8A_00175600	conserved Plasmodium protein, unknown function	1	1170	15.84	PRELSG_0009200	PF3D7_1369100		0
PGAL8A_00175700	conserved Plasmodium protein, unknown function	1	6309	36.108	PRELSG_0009100	PF3D7_1369200		2
PGAL8A_00175800	conserved Plasmodium protein, unknown function	2	1218	24.762	PRELSG_0009000	PF3D7_1369300		0
PGAL8A_00175900	conserved Plasmodium protein, unknown function	2	7662	4.506	PRELSG_0008900	PF3D7_1369400		0
PGAL8A_00176000	conserved Plasmodium protein, unknown function	2	3168	42.193	PRELSG_0008800	PF3D7_1369500		0
PGAL8A_00176100	conserved Plasmodium protein, unknown function	1	2517	95.654	PRELSG_0008700	PF3D7_1369600		0
PGAL8A_00176200	U2 small nuclear ribonucleoprotein A', putative	5	528	37.962	PRELSG_0008600	PF3D7_1369700		0		Pfam:PF14580.1(LRR_9)
PGAL8A_00176800	hypothetical protein	3	1644	62.372			4.46484	0
PGAL8A_00176900	Plasmodium exported protein, unknown function	2	693	0.306			6.5084	3
PGAL8A_00177000	fam-h protein	2	699	0.101			5.3189	3
PGAL8A_00177100	fam-h protein	2	699	0.136			5.401	3
PGAL8A_00177200	Plasmodium exported protein, unknown function	2	693	1.044			3.7632	3
PGAL8A_00177300	fam-e protein	2	669	7.235				1
PGAL8A_00177400	hypothetical protein	1	297	7.522				1
PGAL8A_00177500	hypothetical protein	1	363	0.498				0
PGAL8A_00177600	early transcribed membrane protein	1	585	291.462	PRELSG_0016300			0	25	Pfam:PF09716.5(ETRAMP)
PGAL8A_00177700	Plasmodium exported protein (PHIST), unknownfunction	2	720	49.188	PRELSG_0016400		4.2702	0		Pfam:PF09687.5(PRESAN)
PGAL8A_00177800	Plasmodium exported protein (PHIST), unknownfunction	2	669	5.915			8.5762	1		Pfam:PF09687.5(PRESAN)
PGAL8A_00177900	cysteine-rich protective antigen, putative	2	1065	13.731	PRELSG_0016600	PF3D7_0423800		0	25
PGAL8A_00178000	Plasmodium exported protein, unknown function	2	633	0.584			7.95283	1
PGAL8A_00178100	hypothetical protein	1	768	319.626			4.9897	1
PGAL8A_00178200	fam-e protein	2	1050	1.198				1
PGAL8A_00178300	PIR-like protein	3	1005	0.759			6.91328	1
PGAL8A_00178400	PIR-like protein	3	1065	0.901			7.47901	1
PGAL8A_00178500	fam-g protein	2	306	324.89			4.0045	1
PGAL8A_00178600	fam-e protein	2	1032	2.708				1
PGAL8A_00178700	fam-e protein	2	1068	76.27				1
PGAL8A_00178800	hypothetical protein	2	291	0.676				1
PGAL8A_00178900	fam-i protein	2	1446	0.468				0
PGAL8A_00179000	surface-associated interspersed protein (SURFIN)	2	4839	0.081				0
PGAL8A_00179100	fam-g protein	2	462	0.783			5.5945	1
PGAL8A_00179200	fam-g protein	2	759	6.498			1.922	1
PGAL8A_00179300	surface-associated interspersed protein (SURFIN)	1	1719	0.211				0
PGAL8A_00179400	surface-associated interspersed protein (SURFIN)	2	5796	0.318				1		Pfam:PF12879.2(SICA_C)
PGAL8A_00179500	surface-associated interspersed protein (SURFIN),fragment	2	447	0.352				1
PGAL8A_00179600	fam-e protein	2	1158	0.727				1
PGAL8A_00179700	surface-associated interspersed protein (SURFIN)	2	4665	0.061				1
PGAL8A_00179800	fam-e protein	2	1068	68.453				1
PGAL8A_00179900	surface-associated interspersed protein (SURFIN)	3	6165	0.221				0		Pfam:PF12879.2(SICA_C)
PGAL8A_00180000	gamete antigen 27/25, putative	1	621	5531.86				0		Pfam:PF09216.5(Pfg27)
PGAL8A_00180100	hypothetical protein	2	240	17.47				1
PGAL8A_00180200	Plasmodium exported protein, unknown function	2	831	0.473			6.6554	1
PGAL8A_00180300	early transcribed membrane protein	1	627	38.354				1	25	Pfam:PF09716.5(ETRAMP)
PGAL8A_00180400	hypothetical protein	4	2064	0.324	PRELSG_0026100			0
PGAL8A_00180500	early transcribed membrane protein	1	609	42.109	PRELSG_0026000			1		Pfam:PF09716.5(ETRAMP)
PGAL8A_00180600	fam-i protein	2	1449	199.153				0
PGAL8A_00180700	hypothetical protein	1	351	2714.91				1	25	Pfam:PF09716.5(ETRAMP)
PGAL8A_00181100	conserved Plasmodium protein, unknown function	4	315	29.709	PRELSG_0314100	PF3D7_0725400		0
PGAL8A_00181200	protein kinase, putative	1	6348	9.512	PRELSG_0314000			1		Pfam:PF00069.20(Pkinase)
PGAL8A_00181300	fam-e protein	1	714	2.865				1
PGAL8A_00181400	conserved Plasmodium protein, unknown function	2	2280	32.422	PRELSG_0313900	PF3D7_0725300		0
PGAL8A_00181500	mago nashi protein homologue, putative	4	447	582.045	PRELSG_0313800	PF3D7_0725200		0		Pfam:PF02792.9(Mago_nashi)
PGAL8A_00181600	conserved Plasmodium protein, unknown function	2	4011	5.88	PRELSG_0313700	PF3D7_0725100		8
PGAL8A_00181700	exonuclease I, putative	1	3369	79.764	PRELSG_0313600	PF3D7_0725000		0		Pfam:PF00752.12(XPG_N),Pfam:PF00867.13(XPG_I)
PGAL8A_00181800	kinesin-19, putative	1	6633	22.315	PRELSG_0313500	PF3D7_0724900		0		Pfam:PF00225.18(Kinesin)
PGAL8A_00181900	kelch protein, putative	4	1179	6.278	PRELSG_0313400	PF3D7_0724800		0		Pfam:PF01344.20(Kelch_1)
PGAL8A_00182000	conserved Plasmodium protein, unknown function	5	10143	35.606	PRELSG_0313300	PF3D7_0724700		0
PGAL8A_00182100	protein kinase, putative	5	5202	31.857	PRELSG_0313200	PF3D7_0724600		0
PGAL8A_00182200	conserved Plasmodium protein, unknown function	4	948	24.861	PRELSG_0313100	PF3D7_0724500		0
PGAL8A_00182300	mitochondrial import inner membrane translocasesubunit TIM14, putative	2	345	99.163	PRELSG_0313000	PF3D7_0724400		0	17	Pfam:PF00226.26(DnaJ)
PGAL8A_00182400	3-demethylubiquinone-9 3-methyltransferase,putative	2	1053	12.513	PRELSG_0312900	PF3D7_0724300		0		Pfam:PF13489.1(Methyltransf_23)
PGAL8A_00182500	type 2A phosphatase-associated protein 42,putative	1	1119	83.993	PRELSG_0312800	PF3D7_0724200		0		Pfam:PF04177.7(TAP42)
PGAL8A_00182600	conserved Plasmodium protein, unknown function	2	3156	83.645	PRELSG_0312700	PF3D7_0724100		0
PGAL8A_00182700	Rab GTPase activator and protein kinase,putative	2	4926	15.821	PRELSG_0312600	PF3D7_0724000		5		Pfam:PF00069.20(Pkinase)
PGAL8A_00182800	conserved Plasmodium protein, unknown function	4	3798	146.346	PRELSG_0312500	PF3D7_0723900		1		Pfam:PF13893.1(RRM_5)
PGAL8A_00182900	conserved Plasmodium protein, unknown function	4	6372	271.698	PRELSG_0312400	PF3D7_0723800		0
PGAL8A_00183000	metallo-hydrolase/oxidoreductase, putative	1	2697	22.651	PRELSG_0312300	PF3D7_0723700		1		Pfam:PF12706.2(Lactamase_B_2)
PGAL8A_00183100	conserved Plasmodium protein, unknown function	3	414	13.548	PRELSG_0312200	PF3D7_0723600		0
PGAL8A_00183200	dynactin subunit 5, putative	1	684	20.667	PRELSG_0312100	PF3D7_0723500		0		Pfam:PF00132.19(Hexapep)
PGAL8A_00183300	conserved Plasmodium protein, unknown function	1	4482	65.7	PRELSG_0312000			0
PGAL8A_00183400	conserved Plasmodium protein, unknown function	1	2451	47.539		PF3D7_0723300		0
PGAL8A_00183500	conserved Plasmodium protein, unknown function	4	1065	8.723	PRELSG_0200200	PF3D7_0723200		0	19	Pfam:PF13385.1(Laminin_G_3)
PGAL8A_00183600	conserved Plasmodium protein, unknown function	1	1377	20.263	PRELSG_0200300	PF3D7_0723100		0
PGAL8A_00183700	tRNAHis guanylyltransferase, putative	1	954	66.098	PRELSG_0200400	PF3D7_0723000		0		Pfam:PF04446.7(Thg1),Pfam:PF14413.1(Thg1C)
PGAL8A_00183800	conserved Plasmodium protein, unknown function	11	954	23.845	PRELSG_0200500	PF3D7_0722900		0
PGAL8A_00183900	conserved Plasmodium protein, unknown function	1	1812	30.302	PRELSG_0200600	PF3D7_0722800		0	21
PGAL8A_00184000	conserved Plasmodium protein, unknown function	2	240	281.455	PRELSG_0200700	PF3D7_0722700		0
PGAL8A_00184100	U3 small nucleolar RNA-associated protein 7,putative	1	1959	32.63	PRELSG_0200800	PF3D7_0722600		0		Pfam:PF00400.27(WD40),Pfam:PF08149.6(BING4CT)
PGAL8A_00184200	pre-mRNA-splicing factor CWC15, putative	2	819	139.771	PRELSG_0200900	PF3D7_0722500		0		Pfam:PF04889.7(Cwf_Cwc_15)
PGAL8A_00184300	GTP-binding protein, putative	3	1179	182.957	PRELSG_0201000	PF3D7_0722400		0		Pfam:PF01926.18(MMR_HSR1),Pfam:PF06071.8(YchF-GTPase_C)
PGAL8A_00184400	ubiquitin carboxyl-terminal hydrolase, putative	1	3462	58.04	PRELSG_0201100	PF3D7_0722300		0		Pfam:PF02148.14(zf-UBP)
PGAL8A_00184500	rhoptry-associated leucine zipper-like protein 1,putative	1	2286	145.991	PRELSG_0201200	PF3D7_0722200		0	17
PGAL8A_00184600	TRAP-like protein, putative, fragment	1	864	2.076				0
PGAL8A_00184700	ras-related protein RAB7, putative	7	621	708.627	PRELSG_0700300	PF3D7_0903200		0		Pfam:PF00071.17(Ras)
PGAL8A_00184800	protein RER1, putative	2	606	94.099	PRELSG_0700200	PF3D7_0903100	3.08962	4		Pfam:PF03248.8(Rer1)
PGAL8A_00184900	conserved protein, unknown function	1	492	44.752	PRELSG_0700100	PF3D7_0903000		0
PGAL8A_00185000	Plasmodium exported protein, unknown function	2	474	1.975				0	24
PGAL8A_00185400	aspartate aminotransferase, putative	1	1218	133.717	PRELSG_0026600			0		Pfam:PF00155.16(Aminotran_1_2)
PGAL8A_00185500	hypothetical protein	1	774	0.528				1	27
PGAL8A_00185600	gamete antigen 27/25, putative	1	624	643.751				0		Pfam:PF09216.5(Pfg27)
PGAL8A_00185700	reticulocyte binding protein, putative	2	1329	0.136				1
PGAL8A_00185800	PIR-like protein, pseudogene	3	1641	0.067	PRELSG_0001800		4.57973	1
PGAL8A_00185900	fam-e protein, fragment	1	261	7.113				0
PGAL8A_00186000	Plasmodium exported protein, unknown function	4	1986	17.686				0
PGAL8A_00186100	Plasmodium exported protein (PHIST), unknownfunction	2	702	178.374			8.14613	0		Pfam:PF09687.5(PRESAN)
PGAL8A_00186200	fam-e protein	1	1188	72.275				1
PGAL8A_00186300	fam-f protein	3	1773	22.335			3.1379	1
PGAL8A_00186400	fam-f protein	3	1776	1.178			2.3342	2
PGAL8A_00186500	surface-associated interspersed protein (SURFIN),pseudogene	10	2403	0.072				4
PGAL8A_00186600	fam-f protein	3	1767	0.156			8.02545	0
PGAL8A_00186700	fam-f protein	3	1755	1.555			2.2293	1
PGAL8A_00186800	fam-f protein	3	1755	1.502			9.55486	1
PGAL8A_00186900	fam-f protein	3	1755	0.291			8.35513	0
PGAL8A_00187000	fam-f protein	3	1812	0.256				1
PGAL8A_00187100	fam-f protein, pseudogene	3	1818	0.662			9.39443	1
PGAL8A_00187200	fam-f protein	3	1788	0.392			2.9942	2
PGAL8A_00187300	fam-f protein	3	1788	0.321			3.935	1
PGAL8A_00187400	fam-f protein	3	1785	0.132			3.782	1
PGAL8A_00187500	fam-f protein	3	1776	3.729			3.8508	1
PGAL8A_00187600	Plasmodium exported protein, unknown function	2	651	0.036			5.8307	1
PGAL8A_00187700	fam-g protein	2	1041	1.421			7.79618	0
PGAL8A_00187800	fam-g protein	2	672	2.341			7.19684	0
PGAL8A_00187900	fam-g protein	2	948	2.489			7.73686	0	23
PGAL8A_00188000	fam-g protein	2	792	8.294			0.095	1
PGAL8A_00188100	hypothetical protein	2	405	10.275				1
PGAL8A_00188200	conserved Plasmodium protein, unknown function	2	564	7.239			1.4163	3	27
PGAL8A_00188300	fam-g protein	2	789	5.773			1.0633	1
PGAL8A_00188400	fam-g protein	2	675	12.528			8.47223	1		Pfam:PF09688.5(Wx5_PLAF3D7)
PGAL8A_00188500	fam-g protein	2	1047	18.197			7.47629	0
PGAL8A_00188600	fam-g protein	2	831	44.501			8.93709	1
PGAL8A_00188700	fam-g protein	2	909	15.551			7.04497	0	29	Pfam:PF09688.5(Wx5_PLAF3D7)
PGAL8A_00188800	fam-g protein	2	549	177.389			6.46015	0	29
PGAL8A_00188900	fam-g protein	2	621	13.364			7.34004	0
PGAL8A_00189000	fam-g protein	2	426	6.001			5.9298	2
PGAL8A_00189100	fam-g protein	2	732	13.551			6.59735	0
PGAL8A_00189200	fam-g protein	2	1353	14.547			5.86403	0	23
PGAL8A_00189400	fam-g protein	2	519	102.355			7.92796	1
PGAL8A_00189600	hypothetical protein	8	2613	18.317				0	22
PGAL8A_00189700	fam-g protein	1	348	0.769				1
PGAL8A_00189800	fam-g protein	1	852	6.731				0
PGAL8A_00189900	reticulocyte binding protein, putative,pseudogene	2	927	0.289				0
PGAL8A_00190000	Plasmodium exported protein, unknown function	2	729	29.826		PF3D7_0936200	1.4767	1		Pfam:PF09688.5(Wx5_PLAF3D7)
PGAL8A_00190100	fam-g protein	2	1308	586.755			9.05332	0		Pfam:PF09688.5(Wx5_PLAF3D7)
PGAL8A_00190200	surface-associated interspersed protein (SURFIN)	3	2970	84.357	PRELSG_0030200			0	17
PGAL8A_00190300	fam-g protein	2	420	1.011			4.7617	1
PGAL8A_00190400	surface-associated interspersed protein (SURFIN)	2	6273	0.212				1		Pfam:PF12879.2(SICA_C)
PGAL8A_00190500	surface-associated interspersed protein (SURFIN)	1	2826	0.337				0
PGAL8A_00190600	surface-associated interspersed protein (SURFIN),fragment	2	2784	1.314				1
PGAL8A_00190700	hypothetical protein	2	1053	4.101				1		Pfam:PF12319.3(TryThrA_C)
PGAL8A_00190800	Plasmodium exported protein, unknown function,pseudogene	2	1467	2.054			4.76536	1
PGAL8A_00190900	fam-e protein	2	990	3.129				1
PGAL8A_00191000	Plasmodium exported protein, unknown function	2	1722	5.354			3.47984	0
PGAL8A_00191100	fam-e protein, fragment	2	393	5.463				1
PGAL8A_00191200	fam-e protein	1	993	2.194				1
PGAL8A_00191300	Plasmodium exported protein, unknown function	2	1719	4.141			4.24559	0
PGAL8A_00191500	Plasmodium exported protein, unknown function	2	1002	0.322				2
PGAL8A_00191600	hypothetical protein	2	279	2.171				1
PGAL8A_00191700	surface-associated interspersed protein (SURFIN)	3	5685	0.087				0		Pfam:PF12879.2(SICA_C)
PGAL8A_00191800	reticulocyte binding protein, putative,pseudogene	2	4503	0.066				0
PGAL8A_00191900	fam-e protein	2	1014	2.828				1
PGAL8A_00192000	conserved Plasmodium protein, unknown function	1	213	2.622	PRELSG_0516300	PF3D7_0421900		0	21
PGAL8A_00192100	steroid dehydrogenase, putative	5	954	56.566	PRELSG_0516400	PF3D7_0422000		1		Pfam:PF00106.20(adh_short)
PGAL8A_00192200	transmembrane emp24 domain-containing protein,putative	1	1041	45.718	PRELSG_0516500	PF3D7_0422100		2	26	Pfam:PF01105.19(EMP24_GP25L)
PGAL8A_00192300	erythrocyte membrane-associated antigen,putative	1	13701	66.328	PRELSG_0516600	PF3D7_0422200		0
PGAL8A_00192400	serine/threonine protein phosphatase, putative	1	1524	7.737	PRELSG_0516700			0		Pfam:PF00481.16(PP2C)
PGAL8A_00192500	alpha tubulin 2, putative	3	1353	249.314				0		Pfam:PF00091.20(Tubulin),Pfam:PF03953.12(Tubulin_C)
PGAL8A_00192600	40S ribosomal protein S19, putative	2	519	965.983	PRELSG_0516900	PF3D7_0422400		0		Pfam:PF01090.14(Ribosomal_S19e)
PGAL8A_00192700	pre-mRNA-splicing helicase BRR2, putative	1	7878	95.157	PRELSG_0517000	PF3D7_0422500		0		Pfam:PF00270.24(DEAD),Pfam:PF00271.26(Helicase_C),Pfam:PF02889.11(Sec63)
PGAL8A_00192800	conserved Plasmodium protein, unknown function	1	423	20.791	PRELSG_0517100	PF3D7_0422600		0
PGAL8A_00192900	eukaryotic initiation factor 4A-III, putative	1	1173	118.916	PRELSG_0517200	PF3D7_0422700		0		Pfam:PF00270.24(DEAD),Pfam:PF00271.26(Helicase_C)
PGAL8A_00193000	serpentine receptor, putative	7	1386	9.03	PRELSG_0517300	PF3D7_0422800		7		Pfam:PF10192.4(GpcrRhopsn4)
PGAL8A_00193100	conserved Plasmodium protein, unknown function	4	747	14.115	PRELSG_0517400	PF3D7_0422900		0
PGAL8A_00193200	conserved Plasmodium protein, unknown function	1	1104	36.119	PRELSG_0517500	PF3D7_0423000		0
PGAL8A_00193300	AP-4 complex subunit sigma, putative	2	441	35.069	PRELSG_0517600	PF3D7_0423100		0		Pfam:PF01217.15(Clat_adaptor_s)
PGAL8A_00193400	BSD-domain protein, putative	2	405	13.713	PRELSG_0517700	PF3D7_0423200		0		Pfam:PF03909.12(BSD)
PGAL8A_00193500	hypothetical protein	1	1251	195.416	PRELSG_0517800			1
PGAL8A_00193600	asparagine-rich protein	1	579	141.936	PRELSG_0517900			0
PGAL8A_00193700	glideosome associated protein with multiplemembrane spans 2, putative	2	1119	1187.24	PRELSG_0518000	PF3D7_0423500		6		Pfam:PF11677.3(DUF3273)
PGAL8A_00193800	sodium- and chloride-dependent neutral and basicamino acid transporter, putative	1	3333	15.162	PRELSG_0518100			12		Pfam:PF00209.13(SNF)
PGAL8A_00193900	conserved Plasmodium protein, unknown function	1	3558	69.136	PRELSG_0518200	PF3D7_0423600		1
PGAL8A_00194000	conserved Plasmodium protein, unknown function	2	873	14.874	PRELSG_0518300			2	24
PGAL8A_00194080	fam-g protein	1	261					1
PGAL8A_00194100	Plasmodium exported protein, unknown function	2	723	2.677			9.23655	2
PGAL8A_00194200	Plasmodium exported protein, unknown function	2	726	4.204			3.5482	3
PGAL8A_00194300	hypothetical protein	2	999	77.436				1
PGAL8A_00194400	surface-associated interspersed protein (SURFIN)	3	2898	16.698				0
PGAL8A_00194500	PIR-like protein	3	1068	0.096			4.40638	1	18
PGAL8A_00194600	surface-associated interspersed protein (SURFIN)	2	4548	0.033				1
PGAL8A_00194700	fam-e protein	1	993	0.119				1
PGAL8A_00194800	hypothetical protein	2	963	363.324	PRELSG_0004000			1	24
PGAL8A_00194850	Plasmodium exported protein, unknown function	2	594		PRELSG_0022650		1.671	0	33
PGAL8A_00194900	hypothetical protein	1	774	118.607				1
PGAL8A_00195000	early transcribed membrane protein	1	537	65.554		PF3D7_1476100		2	25	Pfam:PF09716.5(ETRAMP)
PGAL8A_00195100	early transcribed membrane protein	1	801	0.137	PRELSG_0004100		5.83998	2	26	Pfam:PF09716.5(ETRAMP)
PGAL8A_00195200	conserved Plasmodium protein, unknown function	1	1635	32.279	PRELSG_0022600	PF3D7_1475900		0
PGAL8A_00195300	PIR-like protein	2	1188	0.126	PRELSG_0017600			1
PGAL8A_00195400	tubulin epsilon chain, putative	1	1497	3.81	PRELSG_1244700	PF3D7_1475700		0		Pfam:PF00091.20(Tubulin),Pfam:PF03953.12(Tubulin_C)
PGAL8A_00195500	conserved Plasmodium protein, unknown function	3	480	2.491	PRELSG_1113100	PF3D7_1357600		0
PGAL8A_00195600	6-cysteine protein, putative	1	1032	1.014	PRELSG_1244600			0		Pfam:PF07422.8(s48_45)
PGAL8A_00195700	bromodomain protein, putative	1	2229	57.994	PRELSG_1244500	PF3D7_1475600		0		Pfam:PF00439.20(Bromodomain)
PGAL8A_00195800	LCCL domain-containing protein	1	4791	25.097	PRELSG_1244400	PF3D7_1475500		0	20	Pfam:PF00754.20(F5_F8_type_C),Pfam:PF03815.14(LCCL)
PGAL8A_00195900	cysteine repeat modular protein 4, putative	2	15672	0.128	PRELSG_1244300	PF3D7_1475400		11		Pfam:PF07699.8(GCC2_GCC3)
PGAL8A_00196000	cytochrome c oxidase assembly protein, putative	1	684	24.876	PRELSG_1244200	PF3D7_1475300		1		Pfam:PF04442.9(CtaG_Cox11)
PGAL8A_00196100	conserved protein, unknown function	1	2889	26.194	PRELSG_1244100	PF3D7_1475200		0		Pfam:PF04408.18(HA2),Pfam:PF07717.11(OB_NTP_bind)
PGAL8A_00196200	conserved protein, unknown function	1	4170	5.529	PRELSG_1244000	PF3D7_1475100		0
PGAL8A_00196300	mediator of RNA polymerase II transcriptionsubunit 31, putative	1	390	8.673	PRELSG_1243900	PF3D7_1475000		0		Pfam:PF05669.7(Med31)
PGAL8A_00196400	trailer hitch homolog, putative	1	966	18.2	PRELSG_1243800	PF3D7_1474900		0		Pfam:PF09532.5(FDF),Pfam:PF12701.2(LSM14)
PGAL8A_00196500	proteasome subunit alpha type-1, putative	3	801	208.338	PRELSG_1243700	PF3D7_1474800		0		Pfam:PF00227.21(Proteasome),Pfam:PF10584.4(Proteasome_A_N)
PGAL8A_00196600	protein kinase, putative	3	2115	10.251	PRELSG_1243600	PF3D7_1474700		0		Pfam:PF00069.20(Pkinase)
PGAL8A_00196700	conserved Plasmodium membrane protein, unknownfunction	5	1152	61.853	PRELSG_1243500	PF3D7_1474600		5		Pfam:PF09335.6(SNARE_assoc)
PGAL8A_00196800	splicing factor 3A subunit 1, putative	1	1773	107.881	PRELSG_1243400	PF3D7_1474500		0		Pfam:PF01805.15(Surp),Pfam:PF12230.3(PRP21_like_P)
PGAL8A_00196900	conserved Plasmodium protein, unknown function	15	8142	17.376	PRELSG_1243300	PF3D7_1474400		2
PGAL8A_00197000	DNA repair metallo-beta-lactamase protein,putative	2	2292	48.627	PRELSG_1243200	PF3D7_1474300		0		Pfam:PF07522.9(DRMBL),Pfam:PF12706.2(Lactamase_B_2)
PGAL8A_00197100	conserved Plasmodium membrane protein, unknownfunction	3	12246	6.144	PRELSG_1243100	PF3D7_1474200		19
PGAL8A_00197200	ribosomal protein L20, putative	2	366	13.068	PRELSG_1243000	PF3D7_1474100		0		Pfam:PF00453.13(Ribosomal_L20)
PGAL8A_00197300	secretory complex protein 62, putative	3	1137	88.318	PRELSG_1242900	PF3D7_1438100		3		Pfam:PF03839.11(Sec62)
PGAL8A_00197600	metacaspase-like protein, putative	7	4938	76.363	PRELSG_1242600	PF3D7_1438400		0
PGAL8A_00197700	cleavage and polyadenylation specificity factorsubunit 3, putative	1	2775	97.139	PRELSG_1242500	PF3D7_1438500		0		Pfam:PF00753.22(Lactamase_B),Pfam:PF07521.7(RMMBL),Pfam:PF10996.3(Beta-Casp),Pfam:PF11718.3(CPSF73-100_C)
PGAL8A_00197800	conserved protein, unknown function	1	834	25.844	PRELSG_1242400	PF3D7_1438600		0		Pfam:PF04190.8(DUF410)
PGAL8A_00197900	DNA primase small subunit	16	1353	48.943	PRELSG_1242300	PF3D7_1438700		0		Pfam:PF01896.14(DNA_primase_S)
PGAL8A_00198000	conserved Plasmodium protein, unknown function	4	2073	9.65	PRELSG_1242200	PF3D7_1438800		0		Pfam:PF12872.2(OST-HTH),Pfam:PF14418.1(OHA)
PGAL8A_00198100	thioredoxin peroxidase 1, putative	1	588	377.443	PRELSG_1242100	PF3D7_1438900		0		Pfam:PF00578.16(AhpC-TSA),Pfam:PF10417.4(1-cysPrx_C)
PGAL8A_00198200	DEAD/DEAH box helicase, putative	2	711	46.878	PRELSG_1242000	PF3D7_1439000		4	24	Pfam:PF04145.10(Ctr)
PGAL8A_00198300	DEAD/DEAH box helicase, putative	5	6960	22.857	PRELSG_1241900	PF3D7_1439100		0		Pfam:PF00270.24(DEAD),Pfam:PF00271.26(Helicase_C),Pfam:PF02889.11(Sec63)
PGAL8A_00198400	conserved Plasmodium protein, unknown function	5	3462	15.09	PRELSG_1241800	PF3D7_1439200		0
PGAL8A_00198500	conserved Plasmodium protein, unknown function	2	4263	43.42	PRELSG_1241700	PF3D7_1439300		2	19	Pfam:PF07738.8(Sad1_UNC)
PGAL8A_00198600	ubiquinol-cytochrome c reductase iron-sulfur,putative	1	1068	482.314	PRELSG_1241600	PF3D7_1439400		1		Pfam:PF00355.21(Rieske),Pfam:PF02921.9(UCR_TM)
PGAL8A_00198700	CCAAT-binding transcription factor, putative	2	2193	55.98	PRELSG_1241500	PF3D7_1439500		0		Pfam:PF00808.18(CBFD_NFYB_HMF)
PGAL8A_00198800	conserved Plasmodium protein, unknown function	1	543	54.225	PRELSG_1241400	PF3D7_1439600		1		Pfam:PF06522.6(B12D)
PGAL8A_00198900	leucine carboxyl methyltransferase, putative	6	987	13.358	PRELSG_1241300	PF3D7_1439700		0		Pfam:PF04072.9(LCM)
PGAL8A_00199000	vesicle-associated membrane protein, putative	2	726	130.046	PRELSG_1241200	PF3D7_1439800		1		Pfam:PF00635.21(Motile_Sperm)
PGAL8A_00199100	triosephosphate isomerase, putative	2	747	235.583	PRELSG_1241100	PF3D7_1439900		0		Pfam:PF00121.13(TIM)
PGAL8A_00199200	conserved Plasmodium protein, unknown function	5	5970	47.518	PRELSG_1241000	PF3D7_1440000		0
PGAL8A_00199300	conserved Plasmodium protein, unknown function	1	2958	57.632	PRELSG_1240900	PF3D7_1440100		0		Pfam:PF04825.8(Rad21_Rec8_N)
PGAL8A_00199400	delta-aminolevulinic acid dehydratase, putative	6	1347	37.335	PRELSG_1240800	PF3D7_1440300		0	18	Pfam:PF00490.16(ALAD)
PGAL8A_00199500	stromal-processing peptidase, putative	6	4311	31.615	PRELSG_1240700	PF3D7_1440200		0	18	Pfam:PF00675.15(Peptidase_M16),Pfam:PF05193.16(Peptidase_M16_C)
PGAL8A_00199600	conserved Plasmodium protein, unknown function	2	3405	53.783	PRELSG_1240600	PF3D7_1440400		0		Pfam:PF00643.19(zf-B_box)
PGAL8A_00199700	allantoicase, putative	1	1425	86.443	PRELSG_1240500	PF3D7_1440500		0		Pfam:PF03561.10(Allantoicase)
PGAL8A_00199800	conserved Plasmodium protein, unknown function	16	1404	5.805	PRELSG_1240400	PF3D7_1440600		0
PGAL8A_00199900	adaptor complexes medium subunit family	1	1872	16.729	PRELSG_1240300	PF3D7_1440700		0		Pfam:PF00928.16(Adap_comp_sub)
PGAL8A_00200000	major facilitator superfamily domain-containingprotein, putative	3	1599	6.376	PRELSG_1240200	PF3D7_1440800		12		Pfam:PF07690.11(MFS_1)
PGAL8A_00200100	conserved Plasmodium protein, unknown function	6	714	37.184	PRELSG_1240100	PF3D7_1440900		0
PGAL8A_00200200	cytoplasmic tRNA 2-thiolation protein 2,putative	1	1539	8.378	PRELSG_1240000	PF3D7_1441000		0		Pfam:PF10288.4(DUF2392)
PGAL8A_00200300	conserved Plasmodium protein, unknown function	1	750	1231.96	PRELSG_1239900			0
PGAL8A_00200400	60S ribosomal protein L1, putative	2	654	201.28	PRELSG_1239800	PF3D7_1441200		0		Pfam:PF00687.16(Ribosomal_L1)
PGAL8A_00200500	serine/threonine protein kinase, putative	5	8526	39.562	PRELSG_1239700	PF3D7_1441300		0		Pfam:PF00069.20(Pkinase)
PGAL8A_00200600	FACT complex subunit SSRP1, putative	1	1509	139.688	PRELSG_1239600	PF3D7_1441400		0		Pfam:PF03531.9(SSrecog),Pfam:PF08512.7(Rtt106)
PGAL8A_00200700	conserved Plasmodium protein, unknown function	4	1455	73.988	PRELSG_1239500	PF3D7_1441500		0
PGAL8A_00200800	acid cluster protein 33 homologue, putative	1	1716	4.983	PRELSG_1239400	PF3D7_1441600		0		Pfam:PF12697.2(Abhydrolase_6)
PGAL8A_00200900	metalloprotease, putative	1	1371	15.894	PRELSG_1239300	PF3D7_1441700		0		Pfam:PF09768.4(Peptidase_M76)
PGAL8A_00201000	vacuolar-sorting protein SNF7, putative	3	690	45.523	PRELSG_1239200	PF3D7_1441800		0		Pfam:PF03357.16(Snf7)
PGAL8A_00201100	RNA polymerase II transcription factor B subunit5, putative	1	204	41.029	PRELSG_1239100	PF3D7_1441900		0		Pfam:PF06331.7(Tbf5)
PGAL8A_00201200	ADP-ribosylation factor, putative	2	558	19.412	PRELSG_1239000	PF3D7_1442000		0		Pfam:PF00025.16(Arf)
PGAL8A_00201300	replication factor A protein 3, putative	5	330	35.208	PRELSG_1238900	PF3D7_1442100		0		Pfam:PF08661.6(Rep_fac-A_3)
PGAL8A_00201400	GTP-binding protein, putative	1	2775	31.401	PRELSG_1238800	PF3D7_1442200		0		Pfam:PF01926.18(MMR_HSR1)
PGAL8A_00201500	tRNA import protein tRIP, putative	2	1194	247.998	PRELSG_1238700	PF3D7_1442300		0		Pfam:PF01588.15(tRNA_bind)
PGAL8A_00201600	conserved Plasmodium protein, unknown function	1	6588	56.068	PRELSG_1238600	PF3D7_1442400		0
PGAL8A_00201700	protein prenyltransferase alpha subunit,putative	8	2073	23.812	PRELSG_1238500	PF3D7_1442500		0		Pfam:PF01239.17(PPTA)
PGAL8A_00201800	TRAP-like protein, putative	3	12885	0.375				1	21
PGAL8A_00201900	conserved Plasmodium protein, unknown function	2	8082	62.471	PRELSG_1238300	PF3D7_1442700		0
PGAL8A_00202000	conserved Plasmodium protein, unknown function	1	1191	25.904	PRELSG_1238200	PF3D7_1442800		0
PGAL8A_00202100	protein transport protein SEC7, putative	1	8763	66.717	PRELSG_1238100	PF3D7_1442900		2		Pfam:PF01369.15(Sec7)
PGAL8A_00202200	serine/threonine protein kinase, putative	1	3786	24.597	PRELSG_1238000	PF3D7_1443000		0		Pfam:PF00069.20(Pkinase)
PGAL8A_00202300	conserved Plasmodium protein, unknown function	1	1605	139.552	PRELSG_1237900	PF3D7_1443100		0
PGAL8A_00202400	conserved Plasmodium protein, unknown function	2	1854	29.781	PRELSG_1237800	PF3D7_1443200		0
PGAL8A_00202500	U6 snRNA-associated Sm-like protein LSm5,putative	3	318	84.206	PRELSG_1237700	PF3D7_1443300		0		Pfam:PF01423.17(LSM)
PGAL8A_00202600	WD repeat-containing protein, putative	2	2295	93.28	PRELSG_1237600	PF3D7_1443400		0		Pfam:PF00400.27(WD40)
PGAL8A_00202700	poly(A)-specific ribonuclease PARN, putative	1	2433	25.636	PRELSG_1237500	PF3D7_1443500		0		Pfam:PF04857.15(CAF1)
PGAL8A_00202800	conserved Plasmodium protein, unknown function	1	5229	78.356	PRELSG_1237400	PF3D7_1443600		0		Pfam:PF04130.8(Spc97_Spc98)
PGAL8A_00202900	dephospho-CoA kinase, putative	2	825	28.586	PRELSG_1237300	PF3D7_1443700		3		Pfam:PF01121.15(CoaE)
PGAL8A_00203000	pre-mRNA-splicing factor CWC24, putative	1	1173	20.36	PRELSG_1237200	PF3D7_1443800		0		Pfam:PF00642.19(zf-CCCH)
PGAL8A_00203100	heat shock protein 90, putative	1	2721	93.597	PRELSG_1237100	PF3D7_1443900		0		Pfam:PF00183.13(HSP90),Pfam:PF13589.1(HATPase_c_3)
PGAL8A_00203200	conserved Plasmodium protein, unknown function	4	684	3.462	PRELSG_1237000	PF3D7_1444000		0
PGAL8A_00203300	conserved Plasmodium protein, unknown function	14	20202	10.745	PRELSG_1236900	PF3D7_1444100		0
PGAL8A_00203400	calmodulin-like protein, putative	3	624	12.027	PRELSG_1236800	PF3D7_1444200		0		Pfam:PF13499.1(EF-hand_7)
PGAL8A_00203500	apicoplast 1-acyl-sn-glycerol-3-phosphate,putative	3	879	52.273	PRELSG_1236700	PF3D7_1444300		3		Pfam:PF01553.16(Acyltransferase)
PGAL8A_00203600	conserved Plasmodium protein, unknown function	3	1476	21.937	PRELSG_1236600	PF3D7_1444400		0
PGAL8A_00203650	mitotic checkpoint protein BUB3, putative	7	966		PRELSG_1236550
[truncated: 3,310 more rows]
