# Supplementary material for: Complete avian malaria parasite genomes reveal features associated with lineage-specific evolution in birds and mammals
Source: Genome Res. 2018 Apr;28(4):547–60. doi: 10.1101/gr.218123.116 (PMC5880244; doi:10.1101/gr.218123.116)
Supplement: Supplemental Material [file supp_gr.218123.116_Supplemental_Table_S8.xlsx]

## Sheet: Supplemental Table S8
Supplemental Table S8: dN/dS values for all genes with 1:1 orthologous across six species.
4335 genes with 1:1 orthologues across P. gallinaceum (PGAL8A), P. relictum (PRELSG), P. falciparum (PF3D7), P. reichenowi (PRCDC), P. knowlesi (PKN) and P. vivax (PVX) are shown along with the annotation for the P. falciparum orthologue. For orthologues in each of the avian (PGAL8A vs PRELSG), falciparum (PF3D7 vs PRCDC) and vivax (PKN vs PVX) clades, dN/dS values were calculated and ranked. Gen…
					dN/dS values			ranked order based on dN/dS values			Annotation			RPKM of expression from Lopez Barragán 2011								Expression percentile							Life-cycle stage with top 20% expression
P. gallinaceum gene	gene length (bp)	Gene expression (FPKM)	alignment length (bp)	Proportion analysed	PGAL8A vs PRELSG	PF3D7 vs PRCDC	PKN vs PVX	PGAL8A vs PRELSG	PF3D7 vs PRCDC	PKN vs PVX	Orthologue in P. falciparum	Protein annotation	gene name	Ring	Early Trophozoite	Late Trophozoite	Schizont	Gametocyte II	Gametocyte V	Ookinete	max	Ring	Early Trophozoite	Late Trophozoite	Schizont	Gametocyte II	Gametocyte V	Ookinete	blood	gametocyte	Ookinete	Other
PGAL8A_00098700	1449	2.562	504	0.347826	0.2272	0.2109	0.3313	157	574	175	PF3D7_0102800	conserved Plasmodium protein, unknown function		3.49	1.61	5.05	2.9	8.08	46.77	28.38	46.7677	29.83	30.36	24.68	39.26	51.05	67.06	52.33	0	0	0	1
PGAL8A_00098800	1833	171.122	1407	0.767594	0.0391	0.021	0.0746	2897	3237	2519	PF3D7_0102900	aspartate--tRNA ligase // aspartyl-tRNA synthetase		40.73	63.02	47.69	12.03	16.72	19.27	27.52	63.0197	81.31	86.97	75.14	66.02	66.47	43.81	51.69	1	0	0	0
PGAL8A_00098900	783	50.765	438	0.559387	0.0447	0.1191	0.1947	2694	1332	730	PF3D7_0103000	vacuolar protein sorting-associated protein VTA1, putative		2.68	1.12	15.83	29.77	34.4	33.56	165.03	165.026	19.71	24.95	49.42	80.47	77.12	58.95	86.9	1	0	1	0
PGAL8A_00099000	4359	42.388	1398	0.320716	0.1783	0.1252	0.2209	299	1249	550	PF3D7_0103100	vacuolar protein sorting-associated protein 51, putative		3.6	0.45	11.41	2.52	2.31	20.87	14.55	20.8695	30.85	12.65	40.73	36.97	20.48	45.82	37.75	0	0	0	1
PGAL8A_00099200	1356	25.055	687	0.506637	0.0747	0.0727	0.0563	1668	2072	2978	PF3D7_0103200	nucleoside transporter 4	ENT4	20.16	90.71	72.39	28.83	102.05	118.18	38.6	118.181	69.93	89.84	82.55	80.06	89.09	83.69	59.6	1	1	0	0
PGAL8A_00099300	2205	28.901	1221	0.553741	0.0322	0.0646	0.0736	3195	2236	2550	PF3D7_0103300	conserved Plasmodium protein, unknown function		29	23.35	21.43	8.53	3.79	11.6	20.81	29.003	76.18	74.88	57.33	59.74	32.2	29.32	44.99	0	0	0	1
PGAL8A_00099400	5841	66.289	1776	0.304058	0.0886	0.2155	0.1651	1320	554	1018	PF3D7_0103400	zinc-carboxypeptidase, putative		7	28.73	44.79	21.88	6.92	91.46	140.11	140.115	50.15	77.69	74.02	76.11	47.52	79.47	84.49	0	0	1	0
PGAL8A_00099500	5037	7.706	1560	0.309708	0.1067	0.4108	0.2789	998	171	303	PF3D7_0103500	conserved Plasmodium protein, unknown function		1.96	1.04	4.5	1.13	2.75	10.01	3.84	10.009	10.32	23.94	23.04	24.52	24.36	26.07	20.37	0	0	0	1
PGAL8A_00099600	3906	16.881	1272	0.325653	0.0882	0.1603	0.0806	1333	915	2394	PF3D7_0103600	ATP-dependent RNA helicase, putative		5.12	11.36	11.76	3.83	11.34	43.03	24	43.0268	41.96	62.1	41.7	44.4	58.7	65.29	48.45	0	0	0	1
PGAL8A_00099700	1524	8.908	519	0.340551	0.1212	0.0999	0.1819	798	1585	850	PF3D7_0103700	L-seryl-tRNA(Sec) kinase, putative		3.18	2.07	4.66	0.73	4.03	22.79	26.97	26.9733	26.07	33.6	23.47	20.17	33.82	48.55	51.24	0	0	0	1
PGAL8A_00099800	1017	18.169	1011	0.9941	0.0078	0.0205	0.0144	4058	3248	4032	PF3D7_0103800	actin-related protein	PfARP1	6.94	1.53	35.35	26.23	102.66	225.51	55.08	225.507	49.96	29.65	68.79	78.69	89.13	90.98	67.47	0	1	0	0
PGAL8A_00099900	1476	112.619	942	0.638211	0.0608	0.0695	0.0954	2114	2145	2092	PF3D7_0103900	parasite-infected erythrocyte surface protein		2.9	5.97	23.14	5.95	3.95	96.1	19.43	96.0953	22.68	51	59.09	53.03	33.3	80.42	43.43	0	1	0	0
PGAL8A_00100000	489	1.046	255	0.521472	0.4152	0.3787	0.4071	17	198	96	PF3D7_0104000	thrombospondin-related sporozoite protein // sporozoite stage TSP1 domain protein	S21	4.88	1.45	6.52	10.75	25.93	130.04	34.13	130.037	40.4	28.75	29.13	64.12	73.07	85.04	56.52	0	1	0	0
PGAL8A_00100200	2361	3.848	1437	0.60864	0.1596	0.5086	0.1145	397	104	1737	PF3D7_0104100	conserved Plasmodium membrane protein, unknown function		2.68	0.53	48.56	243.44	1.2	15.34	4.71	243.441	19.8	14.87	75.61	95.57	12.01	37.04	22.32	1	0	0	0
PGAL8A_00100300	1524	43.529	789	0.517717	0.0273	0.0579	0.0971	3370	2372	2066	PF3D7_0104200	StAR-related lipid transfer protein		7.82	73.8	127.28	88.11	19.15	17.09	55.93	127.284	52.4	88.19	88.94	90.48	68.82	40.33	67.72	1	0	0	0
PGAL8A_00100400	8514	33.629	2418	0.284003	0.0862	0.0494	0.0919	1388	2569	2159	PF3D7_0104300	ubiquitin carboxyl-terminal hydrolase 1, putative		53.12	50.9	45.97	17.89	4.89	12.96	21.99	53.1186	84.85	85.17	74.45	72.84	38.51	32.2	46.2	1	0	0	0
PGAL8A_00100500	1437	51.491	924	0.643006	0.0499	0.0691	0.0744	2482	2155	2528	PF3D7_0104400	4-hydroxy-3-methylbut-2-enyl diphosphate reductase	IspH	7.21	15.58	48.92	17.91	26.95	53.59	180.98	180.982	50.79	67.68	75.73	72.88	73.72	69.88	88.09	0	0	1	0
PGAL8A_00100600	795	55.045	564	0.709434	0.0298	0.0424	0.0335	3262	2702	3581	PF3D7_0104500	conserved protein, unknown function		50.82	34.42	37	3.17	68.04	92.87	21.81	92.8686	84.33	80.11	69.9	40.9	85.55	79.82	46.04	1	1	0	0
PGAL8A_00100700	3531	3.487	1398	0.395922	0.269	0.183	0.2271	86	747	521	PF3D7_0104600	conserved Plasmodium protein, unknown function		2.41	2.64	2.11	0.37	2.33	9.86	0.35	9.8624	16.17	37.74	15.91	15.17	20.7	25.84	12.86	0	0	0	1
PGAL8A_00100800	1800	9.859	1059	0.588333	0.0978	0.1078	0.1272	1145	1474	1536	PF3D7_0104700	major facilitator superfamily-related transporter, putative		2.25	0.41	0.62	0	1.49	4.45	24.24	24.2359	13.8	11.32	8.15	5.14	13.97	15.6	48.69	0	0	0	1
PGAL8A_00100900	1590	33.559	1047	0.658491	0.0482	0.1764	0.0733	2562	787	2561	PF3D7_0104800	novel putative transporter 1, putative		7.83	2.42	26.34	19.49	19.66	62.61	45.19	62.6119	52.41	36.33	62.02	74.23	69.21	73.13	63.34	0	0	0	1
PGAL8A_00101000	429	21.069	387	0.902098	0.0651	0.2319	0.1319	1963	494	1450	PF3D7_0105100	conserved Apicomplexan protein, unknown function		1.93	0.55	4.19	2.72	2.55	8.98	9.72	9.7162	9.96	15.27	22.1	38.24	22.55	24.02	30.88	0	0	0	1
PGAL8A_00101300	1692	77.753	1413	0.835106	0.0306	0.138	0.108	3236	1117	1844	PF3D7_0105200	RAP protein, putative		6.54	16.95	29.94	4.82	6.38	22.26	24.59	29.9371	48.59	69.31	65.28	48.54	45.54	47.97	49.07	0	0	0	1
PGAL8A_00101400	765	34.582	414	0.541176	0.0951	0.001	0.1479	1186	3526	1213	PF3D7_0105300	cyclase-associated protein	C-CAP	5.98	0.97	160.21	242.22	97.38	111.8	60.09	242.221	46.18	23.03	90.84	95.53	88.7	82.86	69.3	1	1	0	0
PGAL8A_00101600	1002	18.072	774	0.772455	0.0272	0.0346	0.0666	3373	2893	2713	PF3D7_0105500	conserved Plasmodium protein, unknown function		2.62	1.46	4.53	1.42	2.13	8.99	5.41	8.9912	18.92	28.82	23.13	27.91	18.76	24.06	23.58	0	0	0	1
PGAL8A_00101700	3195	54.418	1977	0.618779	0.0599	0.0711	0.1161	2143	2115	1715	PF3D7_0105600	conserved Plasmodium protein, unknown function		20.45	14.52	13.55	5.12	5.98	13.72	23.6	23.6044	70.17	66.42	45.47	49.59	43.61	34	47.88	0	0	0	1
PGAL8A_00101900	2313	113.008	1587	0.686122	0.0414	0.0244	0.0624	2813	3150	2813	PF3D7_0105800	conserved Plasmodium protein, unknown function		3.68	1.75	51.14	41.75	8.76	27.97	36.39	51.1395	31.63	31.42	76.61	84.63	52.9	54.2	58.13	1	0	0	0
PGAL8A_00102000	1314	24.803	768	0.584475	0.0803	0.0914	0.2177	1512	1717	575	PF3D7_0105900	DNA binding protein, putative		3.1	1.82	14.91	8.73	8.33	107.59	32.2	107.588	25.21	31.97	48.04	60.38	51.72	82.19	55.1	0	1	0	0
PGAL8A_00102100	2208	85.911	1365	0.618207	0.0524	0.0058	0.0602	2390	3506	2878	PF3D7_0106000	conserved Plasmodium protein, unknown function		5.84	3.87	27.13	22.71	1.79	14.35	21.22	27.1331	45.53	43.98	62.7	76.68	16.31	35.07	45.54	0	0	0	1
PGAL8A_00102200	1152	27.615	1008	0.875	0.0104	0.0055	0.0167	3983	3509	4000	PF3D7_0106100	V-type proton ATPase subunit C, putative		19.66	48.66	59.22	21.69	6.01	13.72	9.72	59.2179	69.47	84.51	79.42	75.97	43.79	33.98	30.88	1	0	0	0
PGAL8A_00102300	636	8.287	429	0.674528	0.2142	0.9507	0.0909	180	20	2188	PF3D7_0106200	conserved Plasmodium protein, unknown function		5.32	1.22	10.67	5.9	6.62	36.65	49.66	49.6606	43.2	26.21	39.18	52.92	46.41	61.04	65.38	0	0	0	1
PGAL8A_00102400	3390	87.306	2661	0.784956	0.0324	0.0129	0.0266	3189	3391	3765	PF3D7_0106300	calcium-transporting ATPase	ATPase6	93.26	83.61	280.66	337.67	27.56	16.46	54.64	337.675	90.27	89.22	93.87	96.75	74.09	39	67.32	1	0	0	0
PGAL8A_00102500	447	37.608	264	0.590604	0.1391	0.452	0.0575	581	132	2952	PF3D7_0106400	pre-rRNA-processing protein TSR2, putative		104.83	42.76	16.25	0.62	102.97	483.24	77.23	483.243	91.36	82.93	50.19	18.87	89.15	95.93	74.57	1	1	0	0
PGAL8A_00102600	3684	38.564	867	0.235342	0.212	0.4021	0.2899	187	179	271	PF3D7_0106500	conserved Plasmodium protein, unknown function		3.6	0.49	6.24	2.98	1.87	13.3	34.68	34.681	30.86	13.42	28.3	39.67	16.91	32.98	56.95	0	0	0	1
PGAL8A_00102800	3792	46.717	2076	0.547468	0.0262	0.0161	0.0582	3424	3332	2932	PF3D7_0106700	small ribosomal subunit assembling AARP2 protein // asparagine and aspartate rich protein 2	PfAARP2	106.91	139.46	60.77	28.74	5.88	13.78	48.1	139.464	91.5	92.42	79.9	80.01	43.15	34.12	64.77	1	0	0	0
PGAL8A_00102900	453	22.002	444	0.980132	0.001	0.001	0.0222	4222	3526	3876	PF3D7_0106800	ras-related protein Rab-5C		4.53	16.47	129.62	91.59	109.46	107.76	60.74	129.624	38.38	68.69	89.04	90.74	89.67	82.21	69.5	1	1	0	0
PGAL8A_00103000	1896	17.426	966	0.509494	0.1005	0.1802	0.2277	1096	759	515	PF3D7_0106900	2-C-methyl-D-erythritol 4-phosphate cytidylyltransferase, putative		1.37	1.15	10.23	5.33	2.99	27.92	41.24	41.2443	5.38	25.39	38.31	50.42	26.28	54.02	61.32	0	0	0	1
PGAL8A_00103200	1320	10.512	624	0.472727	0.1095	0.3212	0.1393	939	264	1336	PF3D7_0107100	conserved Plasmodium protein, unknown function		2.24	3.79	8.17	1.44	4.85	12.12	15.43	15.4316	13.71	43.69	33.29	28.12	38.26	30.54	38.86	0	0	0	1
PGAL8A_00103300	756	8.636	591	0.781746	0.058	0.257	0.2584	2204	405	371	PF3D7_0107200	carbon catabolite repressor protein 4, putative		2.68	2.82	11.93	1.74	16.92	13.96	13.8	16.9185	19.71	38.7	42.05	30.7	66.67	34.43	36.71	0	0	0	1
PGAL8A_00103500	456	55.1	408	0.894737	0.0388	0.0844	0.0426	2910	1844	3324	PF3D7_0107400	conserved Apicomplexan protein, unknown function		37.96	6.52	31.71	10.81	293.97	189.68	66.63	293.969	80.18	52.31	66.45	64.2	94.58	89.34	71.55	1	1	0	0
PGAL8A_00103600	3960	73.603	2454	0.619697	0.0803	0.0128	0.0298	1512	3394	3676	PF3D7_0107500	lipid/sterol:H+ symporter		390.78	328.86	149.51	30.44	11.56	14.56	47.56	390.776	97.13	95.46	90.34	80.73	59.18	35.42	64.55	1	0	0	0
PGAL8A_00103900	1212	3.576	471	0.388614	0.0814	0.0736	0.0667	1487	2049	2709	PF3D7_0107700	conserved Plasmodium membrane protein, unknown function		2.02	0.77	6.81	1.1	12.87	83.2	36.52	83.2022	10.91	19.87	29.88	24.22	61.35	78.12	58.21	0	0	0	1
PGAL8A_00104000	3426	35.229	1290	0.376532	0.0523	0.0493	0.0834	2395	2572	2338	PF3D7_0107800	double-strand break repair protein MRE11		3.19	5.35	11.91	2.86	2.88	14.19	17.76	17.7631	26.12	49.16	41.98	39.05	25.43	34.86	41.82	0	0	0	1
PGAL8A_00104100	666	5.516	417	0.626126	0.041	0.057	0.2643	2834	2398	350	PF3D7_0107900	conserved Plasmodium protein, unknown function		3.91	13.79	17.49	2.84	34.53	134.63	28.73	134.634	33.37	65.53	51.95	38.96	77.17	85.6	52.55	0	1	0	0
PGAL8A_00104200	657	218.621	612	0.931507	0.0341	0.0408	0.0169	3116	2738	3996	PF3D7_0108000	proteasome subunit beta type-3, putative		159.68	133.6	470.57	218.31	255.26	190.92	115	470.574	93.8	92.18	96.11	95.14	94.11	89.46	81.74	1	1	1	0
PGAL8A_00104300	1899	19.2	1086	0.57188	0.1199	0.2043	0.0915	813	611	2170	PF3D7_0108100	conserved Plasmodium protein, unknown function		1.91	1.25	7.93	1.94	7.42	76.67	10.65	76.6739	9.74	26.45	32.72	32.34	49.23	76.6	32.55	0	0	0	1
PGAL8A_00104400	6201	178.432	1608	0.259313	0.0313	0.0634	0.0153	3220	2256	4021	PF3D7_0108300	conserved Plasmodium protein, unknown function		270.84	759.62	221.26	247	52.28	43.84	110.4	759.616	95.9	97.44	92.87	95.64	82.45	65.71	81.18	1	1	1	0
PGAL8A_00104600	597	179.927	123	0.20603	0.0665	0.001	0.001	1910	3526	4217	PF3D7_0108500	conserved Plasmodium protein, unknown function		47662.7	2978.85	4995.51	6377.32	1011.73	555.59	510.42	47662.7	99.98	99.34	99.43	99.58	97.91	96.33	96.76	1	1	1	0
PGAL8A_00104700	894	39.57	423	0.473154	0.2091	0.346	0.1417	192	235	1298	PF3D7_0108600	conserved Plasmodium protein, unknown function		47.83	8.18	26.27	7.02	23.52	153.56	71.4	153.562	83.49	56.26	61.97	55.98	71.49	87.1	73.15	1	1	0	0
PGAL8A_00376000	2688	66.599	747	0.277902	0.113	0.1174	0.1887	889	1350	781	PF3D7_0108700	secreted ookinete protein, putative		34.07	56.07	94.47	27.79	12.59	29.4	167.05	167.055	78.5	86	86.03	79.5	60.81	55.37	87.1	1	0	1	0
PGAL8A_00104800	999	21.611	726	0.726727	0.0549	0.0692	0.0939	2311	2153	2118	PF3D7_0108800	conserved Plasmodium protein, unknown function		10.31	21.31	39.59	16.01	48.13	333.24	171.82	333.237	58.09	73.39	71.33	71.02	81.36	94.08	87.43	0	1	1	0
PGAL8A_00104900	669	212.771	603	0.901345	0.0931	0.3041	0.1492	1223	297	1194	PF3D7_0109000	photosensitized INA-labeled protein PHIL1, putative		8.04	1.76	173.48	117.56	1516.29	1107.23	410.41	1516.29	53.09	31.53	91.43	92.05	98.44	97.99	95.46	1	1	1	0
PGAL8A_00105000	2970	17.547	2295	0.772727	0.0537	0.0923	0.1324	2356	1700	1441	PF3D7_0109100	LCCL domain-containing protein	LAP3	1.99	0.36	5.43	5.14	16.73	59.48	88.75	88.7476	10.63	9.73	25.71	49.71	66.51	71.94	77.39	0	0	0	1
PGAL8A_00105100	696	28.403	486	0.698276	0.0165	0.001	0.0474	3782	3526	3200	PF3D7_0109200	cleavage and polyadenylation specificity factor subunit 5, putative		18.82	22.69	48.97	14.3	155.12	202.33	66.05	202.333	68.82	74.55	75.77	69.27	91.97	90.06	71.32	0	1	0	0
PGAL8A_00105200	963	9.124	636	0.660436	0.0621	0.1551	0.0528	2061	956	3074	PF3D7_0109300	fatty acid elongation protein, GNS1/SUR4 family, putative		1.72	1.31	5.01	1.82	26.56	94.84	2.89	94.8359	7.82	27.11	24.58	31.44	73.53	80.18	18.21	0	1	0	0
PGAL8A_00105300	498	55.302	372	0.746988	0.1255	0.4751	0.2644	746	116	349	PF3D7_0109400	tubulin-specific chaperone a, putative		12.71	21.84	45.01	9.39	1702.46	1264.05	444.04	1702.46	61.97	73.79	74.14	61.71	98.53	98.22	96.02	0	1	1	0
PGAL8A_00105400	468	29.146	408	0.871795	0.0192	0.1187	0.0357	3685	1338	3519	PF3D7_0109500	N-acetyltransferase, putative		57.99	220.59	274.13	167.05	497.45	1431.89	370.71	1431.89	85.94	94.29	93.79	93.72	96.35	98.34	94.79	1	1	1	0
PGAL8A_00105500	423	15.101	288	0.680851	0.0737	0.0966	0.1037	1702	1627	1939	PF3D7_0109600	cold-shock protein, putative		14.98	11.55	9.63	1.95	128.91	178.04	12.35	178.038	64.77	62.37	36.97	32.4	90.76	88.7	34.92	0	1	0	0
PGAL8A_00105600	564	14.282	231	0.409574	0.015	0.1011	0.0798	3835	1566	2413	PF3D7_0109700	rRNA biogenesis protein RRP36, putative		47.09	44.39	13.57	5.86	58.77	103.43	106.46	106.456	83.21	83.4	45.51	52.74	83.92	81.58	80.45	1	1	1	0
PGAL8A_00105700	1632	60.772	1305	0.799632	0.0558	0.0587	0.064	2288	2361	2777	PF3D7_0109800	phenylalanine--tRNA ligase alpha subunit // phenylalanyl-tRNA synthetase alpha subunit		43.98	29.96	37.81	7.14	10.25	12.23	74.49	74.4909	82.41	78.21	70.47	56.34	56.47	30.73	73.92	1	0	0	0
PGAL8A_00105900	624	20.687	423	0.677885	0.112	0.1703	0.2603	897	833	363	PF3D7_0110000	conserved Plasmodium protein, unknown function		10.07	8.1	57.2	24.6	1649.71	922.76	752.16	1649.71	57.75	56.07	78.83	77.74	98.48	97.68	98.04	0	1	1	0
PGAL8A_00106000	2085	27.663	1041	0.499281	0.0811	0.0946	0.129	1497	1667	1503	PF3D7_0110100	selenocysteine-specific elongation factor selB homologue, putative		9.12	8.93	9.97	2.2	7.45	52.15	12.47	52.1488	55.74	57.73	37.71	34.48	49.28	69.21	35.14	0	0	0	1
PGAL8A_00106100	417	25.712	288	0.690647	0.0126	0.2006	0.0766	3909	632	2475	PF3D7_0110200	FAD-linked sulfhydryl oxidase ERV1, putative	PfERV	7.25	8.63	21.33	2.04	34.11	81.9	29.15	81.9025	50.96	57.12	57.11	33.38	76.99	77.79	52.9	0	0	0	1
PGAL8A_00106200	687	32.966	435	0.633188	0.0132	0.0195	0.0387	3887	3271	3435	PF3D7_0110400	DNA-directed RNA polymerase II subunit RPB9, putative		29.37	46.83	64.19	16.07	24.93	136.1	115.66	136.099	76.41	83.97	80.86	71.06	72.43	85.75	81.81	1	1	1	0
PGAL8A_00106300	5196	61.504	1185	0.22806	0.0584	0.0519	0.1703	2194	2513	951	PF3D7_0110500	bromodomain protein, putative		9.8	30.96	17.52	3.73	14.85	27.44	46.11	46.1073	57.26	78.71	52.03	44.04	64.22	53.59	63.86	0	0	0	1
PGAL8A_00106400	4332	71.47	1725	0.398199	0.0386	0.0387	0.0399	2919	2795	3406	PF3D7_0110600	phosphatidylinositol-4-phosphate 5-kinase	PfPIP5K	242.03	247.82	109	48.67	24.4	26.85	218.06	247.821	95.59	94.77	87.48	86	71.99	52.81	89.87	1	0	1	0
PGAL8A_00106500	1341	391.98	1194	0.89038	0.0156	0.0212	0.027	3817	3231	3748	PF3D7_0110700	chromatin assembly factor 1 protein WD40 domain, putative		16.11	36.13	112.3	25.42	127.6	35.85	126.25	127.602	66.06	80.99	87.78	78.28	90.64	60.64	83	1	1	1	0
PGAL8A_00106600	1101	104.879	936	0.850136	0.0033	0.001	0.0169	4185	3526	3996	PF3D7_0110800	transcription initiation factor TFIIB, putative		76.68	93.94	90.86	30.62	34.47	47.5	138.14	138.139	88.51	90.17	85.46	80.84	77.13	67.39	84.28	1	0	1	0
PGAL8A_00106700	564	53.322	339	0.601064	0.0618	0.0376	0.02	2065	2820	3933	PF3D7_0110900	adenylate kinase-like protein 1		16	9.05	4.69	0.52	12.94	16.93	4.99	16.9336	65.85	57.99	23.56	17.41	61.42	40.11	22.81	0	0	0	1
PGAL8A_00106800	4149	250.936	2364	0.569776	0.0565	0.078	0.0574	2264	1966	2955	PF3D7_0111000	kinesin-8, putative		3.7	1.11	26.92	21.65	3.06	18.46	223.53	223.525	31.83	24.87	62.59	75.94	26.8	42.34	90.15	0	0	1	0
PGAL8A_00106900	294	8.188	252	0.857143	0.0052	0.001	0.1303	4145	3526	1481	PF3D7_0111200	conserved Plasmodium protein, unknown function		1.07	0.54	5.32	3	21.69	40.23	23.79	40.2254	3.83	15	25.41	39.86	70.49	63.3	48.15	0	0	0	1
PGAL8A_00107000	3204	28.102	1674	0.522472	0.0915	0.0344	0.0703	1259	2901	2620	PF3D7_0111300	P-loop containing nucleoside triphosphate hydrolase, putative		2.95	2.6	21.23	6.88	3.52	21.11	14.77	21.2302	23.39	37.53	56.98	55.62	30.14	46.36	38.05	0	0	0	1
PGAL8A_00107100	1632	46.977	837	0.512868	0.0202	0.0561	0.0617	3652	2414	2834	PF3D7_0111400	conserved Plasmodium protein, unknown function // gametocyte exported protein 19	PfGEXP19	2.37	1.62	11.83	3.27	7.24	38.42	103.78	103.784	15.6	30.45	41.84	41.39	48.69	62.04	79.9	0	0	0	1
PGAL8A_00107200	1056	58.142	627	0.59375	0.0429	0.0383	0.1134	2754	2801	1753	PF3D7_0111500	UMP-CMP kinase, putative		5.14	9.52	55.89	47.4	25.03	30.23	75.22	75.2222	42.12	58.98	78.28	85.77	72.51	56.27	74.05	1	0	0	0
PGAL8A_00107300	708	11.844	240	0.338983	0.1092	0.0745	0.1846	948	2034	826	PF3D7_0111600	conserved Plasmodium protein, unknown function		1.26	7.32	8.7	3.15	23.11	110.69	41.21	110.692	4.78	54.42	34.53	40.77	71.3	82.66	61.19	0	1	0	0
PGAL8A_00107400	351	11.632	213	0.606838	0.0487	0	0.031	2537	4212	3647	PF3D7_0111700	conserved Plasmodium protein, unknown function		2.36	6.94	7.67	1.66	11.49	17.25	0	17.2514	15.37	53.42	31.99	30.15	58.99	40.51	6.4	0	0	0	1
PGAL8A_00107500	1674	34.997	627	0.374552	0.0946	0.5861	0.1216	1198	72	1632	PF3D7_0111800	eukaryotic translation initiation factor 4E, putative		7.12	21.54	25.31	3.79	3.6	15.25	30.04	30.0404	50.53	73.48	61.02	44.18	30.98	36.92	53.59	0	0	0	1
PGAL8A_00107600	246	36.199	177	0.719512	0.0088	0.001	0.0392	4036	3526	3421	PF3D7_0111900	conserved protein, unknown function		12.31	30.94	81.29	13.14	80.02	89.45	85.31	89.4497	61.45	78.67	84.13	67.65	87.19	79.09	76.48	1	1	0	0
PGAL8A_00107700	1365	45.896	969	0.70989	0.09	0.1297	0.1422	1297	1198	1291	PF3D7_0112000	TatD-like deoxyribonuclease		6.37	5.43	13.9	3.72	3.03	15	33.31	33.3127	47.83	49.45	46.13	43.93	26.55	36.4	55.9	0	0	0	1
PGAL8A_00107800	474	2.257	117	0.246835	0.1673	0.3571	0.3903	359	219	111	PF3D7_0112100	conserved Plasmodium protein, unknown function		1.7	0.64	0	0	0.45	3.35	949.82	949.818	7.59	17.34	1.45	5.14	7.37	13.62	98.56	0	0	1	0
PGAL8A_00021600	1515	13.267	1128	0.744554	0.0934	0.0499	0.1128	1216	2558	1767	PF3D7_0202700	octaprenyl pyrophosphate synthase	PSY	2.84	2.35	13.64	6.36	5.44	31.23	4.33	31.2331	21.91	35.87	45.58	54.11	41.2	57.14	21.46	0	0	0	1
PGAL8A_00021500	363	10.12	261	0.719008	0.2977	0	0.0977	64	4212	2049	PF3D7_0202800	conserved Plasmodium protein, unknown function		5.46	0.22	14.06	5.67	15.75	151.95	0	151.948	43.97	5.33	46.37	51.91	65.41	86.9	6.4	0	1	0	0
PGAL8A_00021300	4878	21.743	1185	0.242927	0.13	0.0444	0.206	677	2661	647	PF3D7_0203000	repetitive organellar protein, putative		4.74	1.27	21.93	17.52	4.57	14	49.94	49.9354	39.59	26.69	57.78	72.53	36.85	34.5	65.5	0	0	0	1
PGAL8A_00021100	1491	13.807	402	0.269618	0.1097	0.0835	0.1871	935	1862	790	PF3D7_0203200	conserved Plasmodium protein, unknown function		10	5.62	5.56	2.51	3.46	52.48	25.71	52.4756	57.66	49.95	26.12	36.85	29.8	69.45	50.16	0	0	0	1
PGAL8A_00021000	681	9.772	513	0.753304	0.0266	0.0117	0.0447	3404	3409	3271	PF3D7_0203300	ERCC1 nucleotide excision repair protein, putative	RAD10	4.15	2.18	11.63	4.43	23.08	297.72	67.17	297.725	35.45	34.33	41.32	47.2	71.28	93.27	71.75	0	1	0	0
PGAL8A_00020900	276	86.474	201	0.728261	0.0295	0.001	0.001	3283	3526	4217	PF3D7_0203400	conserved Plasmodium protein, unknown function		5.3	2.3	237.93	57.5	1059.46	345.6	70.97	1059.46	43.02	35.46	93.25	87.33	97.96	94.2	73.01	1	1	0	0
PGAL8A_00020700	1281	11.09	609	0.47541	0.0351	0.0581	0.1167	3067	2368	1707	PF3D7_0203600	conserved Plasmodium protein, unknown function		4.27	1.04	10.01	3.7	2.54	11.18	2.2	11.1771	36.35	23.82	37.79	43.83	22.49	28.49	16.57	0	0	0	1
PGAL8A_00020600	1068	52.119	492	0.460674	0.0186	0.0238	0.0501	3709	3167	3137	PF3D7_0203700	protein MAK16, putative		151.36	220.99	49.62	4.45	26.16	22.25	60.42	220.994	93.65	94.31	75.96	47.25	73.17	47.93	69.41	1	0	0	0
PGAL8A_00020500	1614	21.733	1278	0.791822	0.0255	0.1079	0.0479	3456	1472	3188	PF3D7_0203800	conserved Plasmodium protein, unknown function		3.08	0.92	14.4	1.98	17.42	329.43	1056.44	1056.44	24.87	22.35	46.75	32.84	67.23	93.92	98.79	0	1	1	0
PGAL8A_00020400	1281	7.32	771	0.601874	0.0383	0.0602	0.0877	2931	2325	2242	PF3D7_0203900	5'-3' exonuclease, N-terminal resolvase-like domain, putative		3.13	10.06	35.31	11.7	2.79	9.06	16.14	35.3081	25.55	59.96	68.76	65.48	24.67	24.16	39.8	0	0	0	1
PGAL8A_00020300	2004	19.156	1269	0.633234	0.0183	0.062	0.0861	3718	2297	2274	PF3D7_0204000	condensin-2 complex subunit H2, putative		2.49	2.09	7.8	1.35	1.7	14.41	12.86	14.4149	17.02	33.74	32.32	27.25	15.72	35.17	35.59	0	0	0	1
PGAL8A_00020200	6078	94.583	2388	0.392892	0.0617	0.0571	0.0746	2068	2391	2519	PF3D7_0204100	conserved Plasmodium protein, unknown function		4.85	3.66	70.8	190.35	10.14	37.66	52.2	190.351	40.16	43.03	82.17	94.58	56.22	61.69	66.23	1	0	0	0
PGAL8A_00020100	816	21.932	459	0.5625	0.0625	0.0966	0.0744	2045	1627	2528	PF3D7_0204200	conserved Plasmodium protein, unknown function		78.76	103.24	106.06	36.08	138.16	647.29	385.56	647.295	88.77	90.79	87.14	82.81	91.09	96.87	95.05	1	1	1	0
PGAL8A_00020000	1911	5.244	477	0.249608	0.3055	0.215	0.1851	58	556	816	PF3D7_0204300	conserved Plasmodium protein, unknown function		28.01	14.03	9.25	1.69	1	5.66	62.9	62.8974	75.68	65.86	35.88	30.45	10.63	17.62	70.31	0	0	0	1
PGAL8A_00019900	324	5.56	318	0.981481	0.0475	0.001	0.0102	2587	3526	4105	PF3D7_0204400	dynein light chain, putative		29.64	11.01	12.45	1.81	0.34	1.8	17.27	29.641	76.6	61.56	43.28	31.36	6.66	10.96	41.1	0	0	0	1
PGAL8A_00019800	1218	13.66	936	0.768473	0.0511	0.1006	0.1959	2441	1576	713	PF3D7_0204500	aspartate transaminase // aspartate aminotransferase	PfAspAT	27.34	12.69	16.89	4.1	1.17	0.56	12.64	27.3397	75.19	63.87	51.2	45.83	11.75	6.97	35.36	0	0	0	1
PGAL8A_00019700	2778	13.635	1149	0.413607	0.1123	0.1462	0.1316	895	1035	1458	PF3D7_0204600	5'-3' exonuclease, putative		6.76	9.02	7.57	3.87	1.36	8.07	7.06	9.0249	49.35	57.92	31.78	44.75	13.14	22.26	26.62	0	0	0	1
PGAL8A_00019600	1509	635.327	1176	0.779324	0.0452	0.0139	0.0694	2678	3372	2636	PF3D7_0204700	hexose transporter	PfHT	58.71	126.71	147.91	105.54	103.22	35.58	71.11	147.906	86.05	91.86	90.25	91.48	89.22	60.29	73.08	1	1	0	0
PGAL8A_00019500	1101	7.545	813	0.73842	0.0411	0.2067	0.1393	2830	597	1336	PF3D7_0204800	3'-5' exonuclease, putative		2.67	3.17	12.24	2.82	23.91	123.59	8.95	123.592	19.59	40.47	42.88	38.87	71.68	84.42	29.69	0	1	0	0
PGAL8A_00019400	1074	17.242	837	0.77933	0.0379	0.0675	0.1361	2948	2189	1381	PF3D7_0204900	2-methoxy-6-polyprenyl-1,4-benzoquinol methylase, mitochondrial, putative		4.31	5.51	34.46	8.56	38	64.72	5.25	64.7155	36.75	49.68	68.34	59.84	78.45	73.67	23.32	0	0	0	1
PGAL8A_00019200	2241	2.735	426	0.190094	0.1643	0.296	0.3121	371	316	214	PF3D7_0205100	conserved Plasmodium protein, unknown function		2.76	0.52	1.24	0.28	3.84	38.03	25.76	38.0332	20.88	14.5	12.1	13.64	32.65	61.81	50.22	0	0	0	1
PGAL8A_00019100	597	6.701	330	0.552764	0.0676	0.1687	0.1299	1884	844	1486	PF3D7_0205200	conserved Plasmodium protein, unknown function		2.65	0.27	2.65	0	4.47	33.95	21.31	33.9524	19.22	6.73	17.74	5.14	36.16	59.22	45.58	0	0	0	1
PGAL8A_00019000	1569	3.896	681	0.434034	0.2416	0.4353	0.1965	127	143	710	PF3D7_0205300	conserved Plasmodium protein, unknown function		1.97	0.77	1.38	0.32	5.23	18.02	11.34	18.0152	10.44	19.96	12.83	14.3	40.33	41.6	33.59	0	0	0	1
PGAL8A_00018900	1341	34.68	1032	0.769575	0.0158	0.0276	0.0163	3807	3087	4007	PF3D7_0205400	PCI domain-containing protein, putative		33.96	12.41	15.93	2.35	17.85	46.42	14.26	46.4224	78.45	63.39	49.71	35.49	67.65	66.82	37.35	0	0	0	1
PGAL8A_00018800	399	23.836	393	0.984962	0.0122	0.001	0.0085	3923	3526	4128	PF3D7_0205500	DNA-directed RNA polymerase II 16 kDa subunit, putative		50.76	22.06	51.77	6.63	100.32	176.38	24.55	176.381	84.32	73.95	76.91	54.93	88.96	88.59	49	1	1	0	0
PGAL8A_00018700	1842	15.502	1338	0.726384	0.0162	0.001	0.0228	3796	3526	3865	PF3D7_0205600	conserved Plasmodium protein, unknown function		8.64	14.79	43	15.71	13.03	11.69	35.2	42.9999	54.58	66.78	73.07	70.57	61.59	29.63	57.31	0	0	0	1
PGAL8A_00018500	363	11.464	354	0.975207	0.1427	0.0498	0.0814	539	2559	2380	PF3D7_0205800	PH domain-containing protein, putative		27.61	14.2	65.52	42.91	107.85	371.99	77.09	371.991	75.4	66.06	81.25	84.87	89.6	94.77	74.54	1	1	0	0
PGAL8A_00018400	2817	201.763	2211	0.784878	0.0151	0.0076	0.0233	3831	3492	3854	PF3D7_0205900	26S proteasome regulatory subunit RPN1, putative		58.08	101.92	347.29	394.72	101.4	58.31	147.58	394.718	85.98	90.72	94.81	97.02	89.03	71.46	85.32	1	1	1	0
PGAL8A_00018300	4833	58.985	1809	0.374302	0.0827	0.1335	0.0663	1460	1161	2726	PF3D7_0206000	DNA repair protein RAD2, putative	XPG	12.52	11.8	12.26	8.07	2.05	10.78	150.34	150.335	61.69	62.64	42.93	58.73	18.23	27.61	85.62	0	0	1	0
PGAL8A_00018200	729	11.989	504	0.691358	0.0609	0.176	0.1569	2112	792	1097	PF3D7_0206100	cysteine desulfuration protein SufE	PfSufE	20.74	26.11	29.08	9.41	20.53	31.15	89.54	89.5445	70.43	76.44	64.51	61.74	69.78	57.07	77.65	0	0	0	1
PGAL8A_00018100	1617	10.693	1215	0.751391	0.042	0.0147	0.0242	2789	3353	3835	PF3D7_0206200	pantothenate transporter		8.61	2.52	34.8	35.83	4.79	27.92	147.49	147.494	54.46	37.08	68.55	82.74	38.01	54.04	85.3	1	0	1	0
PGAL8A_00018000	2469	30.115	759	0.307412	0.095	0.0997	0.1932	1187	1588	744	PF3D7_0206500	conserved Plasmodium protein, unknown function		33.32	35.31	26.04	7.09	3.42	25.93	43.81	43.8142	78.12	80.63	61.64	56.15	29.44	51.91	62.64	1	0	0	0
PGAL8A_00017900	321	13.527	273	0.850467	0.0062	0.001	0.0323	4121	3526	3613	PF3D7_0206600	DNA-directed RNA polymerase III subunit RPC10, putative		34.47	16.8	8.2	0	9.59	22.65	0	34.4708	78.74	69.12	33.41	5.14	54.89	48.4	6.4	0	0	0	1
PGAL8A_00017800	1413	99.124	1149	0.813163	0.0482	0.0267	0.0798	2562	3102	2413	PF3D7_0206700	adenylosuccinate lyase	ASL	63.99	56.05	58.17	32.38	15.77	11.43	12.85	63.9893	86.83	85.98	79.18	81.6	65.43	29.08	35.55	1	0	0	0
PGAL8A_00017500	678	337.596	183	0.269912	0.3096	0	0.342	56	4212	161	PF3D7_0207000	merozoite surface protein 4		19.25	11.42	869.33	2589.22	246.8	89.36	263.08	2589.22	69.14	62.19	97.68	99.17	93.89	79.07	91.86	1	1	1	0
PGAL8A_00017400	4713	41.958	2079	0.44112	0.1615	0.1931	0.2383	386	673	452	PF3D7_0207100	conserved Plasmodium protein, unknown function		3.83	3.38	26.09	21.43	7.79	21.63	273.52	273.523	32.72	41.53	61.78	75.8	50.32	47.12	92.3	0	0	1	0
PGAL8A_00017200	495	12.523	378	0.763636	0.028	0.5558	0.0837	3342	84	2332	PF3D7_0207200	iron-sulfur assembly protein, putative		2.38	0.49	4.09	3.04	8.65	60.81	28.97	60.8112	15.72	13.55	21.88	40.06	52.66	72.46	52.74	0	0	0	1
PGAL8A_00016800	906	93.234	678	0.748344	0.0098	0.001	0.0183	4010	3526	3967	PF3D7_0208200	KRR1 small subunit processome component, putative		48.78	30.21	27.7	1.95	6.09	32.85	21.69	48.7838	83.76	78.32	63.37	32.53	44.24	58.42	45.98	1	0	0	0
PGAL8A_00016700	4644	5.62	1515	0.326227	0.2072	0.1765	0.2927	197	786	254	PF3D7_0208300	conserved Plasmodium protein, unknown function		9.44	6.39	6.37	1.41	6.4	19.68	3.62	19.6776	56.57	51.95	28.67	27.89	45.65	44.26	20.01	0	0	0	1
PGAL8A_00016600	5889	21.35	1269	0.215487	0.0309	0.1435	0.0602	3230	1062	2878	PF3D7_0208400	conserved Plasmodium protein, unknown function		12.61	13.05	24.07	13.59	7.78	42.93	31.08	42.933	61.83	64.46	60.01	68.34	50.3	65.26	54.28	0	0	0	1
PGAL8A_00016500	405	28.144	336	0.82963	0.0223	0.001	0.0457	3563	3526	3247	PF3D7_0208500	acyl carrier protein	PfACP	3.53	2.11	21.67	9.23	24.44	111.69	37.18	111.688	30.23	33.77	57.52	61.38	72.03	82.85	58.56	0	1	0	0
PGAL8A_00016400	1200	45.829	411	0.3425	0.0362	0.001	0.039	3012	3526	3426	PF3D7_0208600	ribosome-recycling factor		5.58	18.43	72.89	18.65	4.33	17.22	92.53	92.5278	44.43	70.73	82.66	73.48	35.42	40.47	78.1	1	0	0	0
PGAL8A_00016200	636	117.416	396	0.622642	0.0283	0.2524	0.1205	3331	418	1643	PF3D7_0208800	conserved Plasmodium protein, unknown function		10.91	11.09	23.25	6.64	162.78	613.52	5.93	613.522	58.96	61.68	59.26	54.99	92.23	96.62	24.38	0	1	0	0
PGAL8A_00016100	6672	13.341	4734	0.709532	0.0762	0.0443	0.059	1623	2664	2914	PF3D7_0208900	6-cysteine protein	PfsMR5	3.4	0.77	1.05	0.04	0.94	3.4	4.28	4.2752	28.67	19.89	11.08	10.37	10.16	13.67	21.31	0	0	0	1
PGAL8A_00016000	8544	372.623	5520	0.646067	0.1465	0.0635	0.0845	503	2252	2311	PF3D7_0209000	6-cysteine protein // transmission-blocking target antigen s230	Pfs230	3.25	1.33	0.66	0.44	11.23	74.66	174.45	174.446	27	27.35	8.52	16.18	58.46	76.16	87.57	0	0	1	0
PGAL8A_00015900	2007	58.295	1602	0.798206	0.0368	0.0383	0.0458	2987	2801	3242	PF3D7_0209100	phospholipase A2, putative		34.54	13.14	51.23	29.25	7.71	10.03	48.7	51.2301	78.8	64.58	76.67	80.25	50.16	26.09	65.09	1	0	0	0
PGAL8A_00015800	789	14.357	642	0.813688	0.0169	0.1141	0.0522	3769	1398	3090	PF3D7_0209200	3'exoribonuclease, putative		24.84	16.47	18.68	2.84	16.47	15.69	121.66	121.664	73.67	68.67	53.73	38.96	66.12	37.51	82.69	0	0	1	0
PGAL8A_00015700	702	22.524	372	0.529915	0.0726	0.001	0.2053	1735	3526	649	PF3D7_0209300	2C-methyl-D-erythritol 2,4-cyclodiphosphate synthase		4.19	7.13	10.13	2.44	11.41	30.57	17.42	30.5692	35.76	53.94	38.08	36.28	58.87	56.57	41.3	0	0	0	1
PGAL8A_00015600	1353	63.118	1203	0.889135	0.0928	0.0132	0.0789	1230	3386	2438	PF3D7_0209400	conserved protein, unknown function		5.32	5.22	14.17	4.78	4.55	39.48	13.44	39.4768	43.24	48.57	46.44	48.44	36.68	62.8	36.26	0	0	0	1
PGAL8A_00015500	1494	1.343	441	0.295181	0.1362	0.1863	0.1955	611	715	725	PF3D7_0209500	conserved Plasmodium protein, unknown function		3.65	0.37	1.19	1.75	0.58	16.19	141.3	141.299	31.37	9.94	11.77	30.74	8.26	38.38	84.68	0	0	1	0
PGAL8A_00015400	2940	26.189	1944	0.661224	0.0467	0.0986	0.0444	2627	1607	3282	PF3D7_0209600	transporter, putative		10.1	2.29	51.33	76.18	3.79	5.62	9.88	76.1799	57.78	35.38	76.7	89.56	32.13	17.57	31.31	1	0	0	0
PGAL8A_00015200	1431	627.574	1245	0.870021	0.0029	0.0125	0.0057	4196	3398	4171	PF3D7_0209800	ATP-dependent RNA helicase UAP56	PfU52	387.47	494.67	527.76	198.94	55.95	51.64	290.21	527.764	97.04	96.38	96.49	94.77	83.4	68.86	92.97	1	1	1	0
PGAL8A_00015100	249	13.901	237	0.951807	0.005	0.2168	0.1331	4152	547	1429	PF3D7_0210000	secretory complex protein 61 gamma subunit		190.53	303.95	560.98	193.55	417.08	3102.37	221.81	3102.37	94.5	95.27	96.68	94.67	95.71	99.15	90.05	1	1	1	0
PGAL8A_00014900	6447	72.267	3570	0.553746	0.0542	0.0633	0.0458	2341	2261	3242	PF3D7_0210200	conserved Plasmodium protein, unknown function		4.13	8.15	42.36	20.06	15.45	35.68	23.78	42.3585	35.17	56.17	72.86	74.71	65.07	60.38	48.1	0	0	0	1
PGAL8A_00014800	1374	17.851	1176	0.855895	0.0406	0.0312	0.0314	2850	2991	3637	PF3D7_0210300	monocarboxylate transporter, putative		3.42	5.71	56.9	20.32	16.09	26.03	15.27	56.8968	28.98	50.25	78.66	74.88	65.8	52.02	38.67	0	0	0	1
PGAL8A_00014700	360	128.136	324	0.9	0.001	0.001	0.0056	4222	3526	4174	PF3D7_0210400	50S ribosomal protein L33, putative		8.41	15.42	52.35	4.9	28.1	33.39	11.66	52.3461	54.01	67.45	77.13	48.85	74.38	58.88	34	0	0	0	1
PGAL8A_00014600	3705	18.066	1680	0.453441	0.1857	1.1659	0.4053	274	11	99	PF3D7_0210500	conserved Plasmodium protein, unknown function		3.1	5.93	3.5	0.73	5.12	18.73	11.77	18.7348	25.21	50.89	20.24	20.1	39.78	42.89	34.14	0	0	0	1
PGAL8A_00014500	1344	11.425	933	0.694196	0.0401	0.1026	0.0562	2867	1544	2981	PF3D7_0210600	conserved Plasmodium protein, unknown function		3.74	1.6	54.43	73.42	12.79	189.97	219.1	219.104	32.18	30.21	77.91	89.29	61.21	89.37	89.93	1	1	1	0
PGAL8A_00014400	942	46.238	759	0.805732	0.1024	0.0525	0.0603	1074	2498	2875	PF3D7_0210700	syntaxin, Qa-SNARE family	Stx1	2.32	0.59	5.14	1.24	7.33	98.27	20.73	98.2702	14.77	16.19	24.84	26.03	49.01	80.82	44.89	0	1	0	0
PGAL8A_00014300	1149	5.333	546	0.475196	0.3504	0.0445	0.465	34	2659	65	PF3D7_0210800	conserved Plasmodium protein, unknown function		13.3	7.18	5.67	1.88	16.65	54.53	4.48	54.5269	62.75	54.04	26.42	31.88	66.38	70.11	21.73	0	0	0	1
PGAL8A_00014100	837	148.551	471	0.562724	0.0456	0.0791	0.3915	2665	1947	108	PF3D7_0210900	conserved Plasmodium protein, unknown function		71.42	49.8	71.9	16.84	4.37	29.93	70.37	71.8962	87.78	84.82	82.43	71.56	35.66	55.93	72.93	1	0	0	0
PGAL8A_00401700	3261	9.051	2004	0.614535	0.2686	0.5162	0.3233	87	100	186	PF3D7_0211100	conserved Plasmodium protein, unknown function		1.21	1.88	1.03	0.17	0.98	6.59	0	6.5949	4.54	32.39	11.01	11.87	10.46	19.28	6.4	0	0	0	1
PGAL8A_00401800	681	19.649	489	0.718062	0.0042	0.001	0.1209	4171	3526	1639	PF3D7_0211200	ras-related protein Rab-5A	PfRab5a	3.69	7.39	29.06	13.28	29.2	47.37	13.83	47.373	31.76	54.6	64.48	67.84	74.99	67.32	36.78	0	0	0	1
PGAL8A_00401900	879	12.449	810	0.921502	0.0604	0.001	0.086	2126	3526	2276	PF3D7_0211300	ubiquinol-cytochrome-c reductase complex assembly factor 1, putative		2.02	0.54	14.04	4.68	73.81	72.9	17.51	73.8141	10.87	15.03	46.36	47.94	86.41	75.54	41.49	0	1	0	0
PGAL8A_00402000	1110	48.666	912	0.821622	0.0433	0.001	0.1839	2738	3526	834	PF3D7_0211400	beta-ketoacyl-ACP synthase III // oxoacyl-ACP synthase	PfKASIII	2.34	0.43	4.94	0	14.78	45.34	8.78	45.3413	15.08	11.93	24.33	5.14	64.1	66.23	29.43	0	0	0	1
PGAL8A_00402100	3972	77.102	1689	0.425227	0.108	0.1499	0.0796	975	1004	2421	PF3D7_0211500	GAF domain-related protein, putative		2.12	0.51	6.78	2.12	3.8	8.3	10.48	10.4804	12.12	14	29.81	34.01	32.27	22.68	32.32	0	0	0	1
PGAL8A_00402300	618	9.228	252	0.407767	0.0646	0	0.1862	1978	4212	801	PF3D7_0211600	UDP-N-acetylglucosamine transferase subunit ALG14, putative		2.15	0.38	5.36	4.67	7.51	18	6.66	18.0025	12.46	10.4	25.46	47.85	49.49	41.56	25.81	0	0	0	1
PGAL8A_00402400	3309	43.252	1047	0.31641	0.0469	0.1282	0.1578	2620	1221	1087	PF3D7_0211700	tyrosine kinase-like protein, putative	PfTKL-1	2.99	3.94	9.38	2.7	2.26	9.32	10.2	10.2043	23.78	44.18	36.39	38.07	20.06	24.87	31.97	0	0	0	1
PGAL8A_00402500	1704	410.044	1572	0.922535	0.0272	0.0505	0.0328	3373	2545	3599	PF3D7_0211800	asparagine--tRNA ligase		128.93	81.45	120.94	24.37	21.3	13.06	44.27	128.933	92.83	88.99	88.49	77.64	70.19	32.44	62.85	1	0	0	0
PGAL8A_00402600	1158	20.923	678	0.585492	0.082	0.0786	0.1048	1474	1958	1918	PF3D7_0211900	conserved Plasmodium protein, unknown function		9.88	2.4	59.36	17.38	8.94	50.3	12.41	59.3613	57.4	36.16	79.47	72.36	53.47	68.36	35.04	0	0	0	1
PGAL8A_00402700	927	3.751	597	0.644013	0.0822	0.4687	0.1005	1468	123	1996	PF3D7_0212000	GDP-fructose:GMP antiporter, putative		4.01	2.29	33.58	10.68	70.85	170.05	31.39	170.054	34.26	35.4	67.72	64.01	86.07	88.33	54.51	0	1	0	0
PGAL8A_00402800	5625	50.296	354	0.0629333	0.0817	0.0772	0.8157	1481	1985	10	PF3D7_0212100	conserved Plasmodium protein, unknown function		26.25	26.6	66.28	25.28	14.23	12.98	82.91	82.9116	74.43	76.68	81.37	78.14	63.37	32.25	75.9	1	0	0	0
PGAL8A_00402900	720	56.715	327	0.454167	0.0657	0.1842	0.0481	1947	739	3180	PF3D7_0212200	mitochondrial ribosomal protein L12 precursor, putative		24.06	32.83	19.18	2.3	34.94	61.97	54.65	61.9738	73.03	79.33	54.35	35.14	77.36	72.91	67.34	0	0	0	1
PGAL8A_00403000	1284	94.992	1044	0.813084	0.001	0.001	0.0016	4222	3526	4212	PF3D7_0212300	peptide chain release factor subunit 1, putative		169.92	227.87	215.79	35.25	13.53	13.74	88.26	227.869	94.01	94.44	92.66	82.57	62.33	34.03	77.29	1	0	0	0
PGAL8A_00403200	9663	47.859	4359	0.451102	0.0417	0.0321	0.0352	2801	2962	3535	PF3D7_0212500	conserved Plasmodium protein, unknown function		35.12	41.66	31.73	9.67	6.08	16.19	39.38	41.662	79	82.5	66.47	62.25	44.21	38.41	60.03	1	0	0	0
PGAL8A_00403300	741	13.058	528	0.712551	0.1112	0.001	0.0777	910	3526	2454	PF3D7_0212600	secreted protein with altered thrombospondin repeat domain	PfSPATR	11.78	1.47	99.45	102.65	29.65	10.56	187.67	187.666	60.53	29.15	86.52	91.31	75.33	27.26	88.35	1	0	1	0
PGAL8A_00403400	1035	5.244	612	0.591304	0.1002	0.1124	0.2009	1100	1418	675	PF3D7_0212700	SRR1-like protein		3.81	4.9	8.33	3.06	1.64	75.88	187.38	187.384	32.54	47.72	33.62	40.25	15.31	76.41	88.33	0	0	1	0
PGAL8A_00403500	2610	1.808	846	0.324138	0.1235	0.1483	0.0798	775	1017	2413	PF3D7_0212800	multidrug efflux pump, putative		2.67	7.12	19.68	6.88	14.51	26.56	12.18	26.5619	19.58	53.92	55.03	55.6	63.77	52.52	34.67	0	0	0	1
PGAL8A_00403600	1203	24.816	762	0.633416	0.0212	0.0313	0.0569	3606	2986	2967	PF3D7_0212900	arginyl-tRNA--protein transferase		2.66	0.36	53.66	32.39	2.1	8.12	29.31	53.6614	19.47	9.78	77.58	81.62	18.6	22.38	53.04	1	0	0	0
PGAL8A_00403700	501	12.184	423	0.844311	0.029	0.3196	0.0901	3310	268	2199	PF3D7_0213000	conserved Plasmodium protein, unknown function		3.54	0.79	11.66	4.69	19.97	108.16	27.93	108.159	30.36	20.29	41.46	48.04	69.43	82.24	51.91	0	1	0	0
PGAL8A_00403800	987	518.644	792	0.802432	0.0055	0.001	0.0542	4136	3526	3036	PF3D7_0213100	protein SIS1		43.89	196.82	124.23	21.44	47.8	122.57	287.77	287.765	82.38	93.85	88.8	75.84	81.22	84.32	92.85	1	1	1	0
PGAL8A_00403900	381	64.811	324	0.850394	0.0536	0.0808	0.2529	2358	1913	393	PF3D7_0213200	conserved Plasmodium protein, unknown function		4.11	5.62	19.22	5.4	77.07	221.35	29.38	221.352	35.07	49.95	54.44	50.81	86.9	90.83	53.08	0	1	0	0
PGAL8A_00404000	191	53.912	150	0.78534	0.001	0.3473	0.158	4222	230	1084	PF3D7_0213300	conserved Plasmodium protein, unknown function		7.05	6.36	39.93	9.92	214.84	115.75	82.65	214.837	50.35	51.84	71.51	62.92	93.53	83.38	75.89	0	1	0	0
PGAL8A_00404100	1041	28.337	924	0.887608	0.0359	0.1137	0.2736	3023	1404	323	PF3D7_0213400	protein kinase 7	PfPK7	4.55	3.07	15.87	7.69	26.32	32.22	164.05	164.046	38.48	39.95	49.58	57.92	73.31	57.92	86.84	0	0	1	0
PGAL8A_00404200	1326	23.119	861	0.649321	0.0679	0.199	0.1921	1866	647	753	PF3D7_0213500	tetratricopeptide repeat protein, putative		8.98	7.11	20.47	2.98	10.1	21.31	107.24	107.237	55.46	53.87	56.14	39.62	56.08	46.7	80.6	0	0	1	0
PGAL8A_00404300	5835	11.609	2451	0.420051	0.1351	0.1291	0.1967	622	1209	707	PF3D7_0213600	conserved Plasmodium protein, unknown function		3.09	0.52	1.87	0.16	4.88	33.25	10.03	33.2472	25.08	14.52	14.89	11.72	38.45	58.73	31.56	0	0	0	1
PGAL8A_00404400	465	106.087	396	0.851613	0.0208	0.001	0.0102	3620	3526	4105	PF3D7_0213700	conserved protein, unknown function		42.43	131.3	73.09	3.16	338.19	252.24	54.16	338.189	81.86	92.07	82.67	40.83	95.07	92.04	67.08	1	1	0	0
PGAL8A_00404600	3171	31.627	888	0.280038	0.1254	0.0999	0.1168	749	1585	1704	PF3D7_0213900	conserved Plasmodium protein, unknown function		16.52	33.52	9.99	1.18	5.21	9.8	13.19	33.5191	66.54	79.71	37.77	25.12	40.25	25.67	36	0	0	0	1
PGAL8A_00404700	1629	287.321	1503	0.922652	0.0271	0.035	0.0192	3380	2883	3951	PF3D7_0214000	T-complex protein 1 subunit theta	TRiCtheta	68.82	79.88	80.47	11.19	17.75	11.66	62.7	80.4722	87.43	88.85	83.99	64.69	67.53	29.51	70.23	1	0	0	0
PGAL8A_00404800	3990	81.827	2400	0.601504	0.0296	0.0242	0.059	3273	3160	2914	PF3D7_0214100	protein transport protein SEC31	PfSec31p	224.57	102.15	407.52	1246.59	28.31	18.18	42.77	1246.59	95.1	90.76	95.53	98.62	74.5	41.95	62.11	1	0	0	0
PGAL8A_00404900	639	126.368	552	0.86385	0.0175	0.0911	0.0268	3751	1729	3757	PF3D7_0214200	mitochondrial ribosomal protein L13 precursor, putative		12.91	3.47	114.23	24.38	204.8	49.76	50.36	204.796	62.14	42.1	87.95	77.65	93.35	68.13	65.59	1	1	0	0
PGAL8A_00405100	1533	22.116	483	0.315068	0.118	0.081	0.1179	836	1904	1685	PF3D7_0214400	conserved Plasmodium protein, unknown function		71.78	43.52	18.98	0.63	8.22	47.9	94.03	94.0277	87.87	83.21	54.09	18.99	51.43	67.65	78.35	1	0	0	0
PGAL8A_00405200	885	6.435	495	0.559322	0.1231	0.1371	0.2291	781	1127	504	PF3D7_0214500	conserved Plasmodium protein, unknown function		6.69	2.32	2.5	0.32	16.36	33.26	0	33.2595	49.09	35.71	17.22	14.35	66.04	58.77	6.4	0	0	0	1
PGAL8A_00405300	4908	26.371	1455	0.296455	0.1159	0.3615	0.1865	855	217	795	PF3D7_0214600	serine/threonine protein kinase, putative		4.24	0.37	11.26	6.4	0.56	4.47	166.97	166.971	36.11	10.13	40.47	54.27	8.03	15.67	87.09	0	0	1	0
PGAL8A_00405400	906	33.706	690	0.761589	0.1686	0.2127	0.1801	349	567	863	PF3D7_0214700	conserved Plasmodium protein, unknown function		4.95	0.18	8.36	6.16	7.65	18.94	151.34	151.341	41.02	4.43	33.72	53.64	49.97	43.43	85.7	0	0	1	0
PGAL8A_00405500	3153	7.26	1503	0.476689	0.1433	0.0837	0.0155	536	1857	4020	PF3D7_0214800	conserved Plasmodium membrane protein, unknown function		33.48	80.6	22.77	8.64	5.82	6.92	19.72	80.6009	78.26	88.92	58.78	60.1	42.95	19.89	43.66	1	0	0	0
PGAL8A_00405600	2649	139.762	483	0.182333	0.0677	0.1191	0.137	1877	1332	1364	PF3D7_0214900	rhoptry neck protein 6	PfRON6	4.9	2.06	61.29	162.25	15.11	8.39	51.49	162.254	40.57	33.55	80.02	93.65	64.67	22.9	65.95	1	0	0	0
PGAL8A_00405800	900	41.71	663	0.736667	0.0122	0.4267	0.0462	3923	155	3231	PF3D7_0215100	RING zinc finger protein, putative		13.27	15.73	67.89	33.09	38.99	27.23	107.63	107.626	62.7	67.92	81.65	81.86	78.81	53.31	80.67	1	0	1	0
PGAL8A_00405900	711	3.961	360	0.506329	0.0556	0.001	0.4428	2292	3526	74	PF3D7_0215200	conserved Plasmodium protein, unknown function		4.54	0.86	2.69	1.6	1.35	38.64	264.6	264.598	38.45	21.48	17.85	29.6	13.07	62.16	91.92	0	0	1	0
PGAL8A_00406000	3945	21.015	1164	0.295057	0.0331	0.029	0.0361	3163	3056	3502	PF3D7_0215400	conserved Plasmodium protein, unknown function		39.16	48.05	43.33	34.54	8.25	9.9	46.01	48.0526	80.68	84.28	73.29	82.31	51.58	25.93	63.77	1	0	0	0
PGAL8A_00406100	2514	37.956	711	0.282816	0.0474	0.2356	0.0508	2592	476	3121	PF3D7_0215500	conserved Plasmodium protein, unknown function		18.42	17.52	12.73	5.25	1.63	9.04	15.85	18.4214	68.5	69.9	43.97	50.15	15.24	24.15	39.36	0	0	0	1
PGAL8A_00406300	3918	39.286	3489	0.890505	0.0054	0.0058	0.0066	4141	3506	4158	PF3D7_0215700	DNA-directed RNA polymerase II subunit RPB2, putative		54.59	63.25	103.28	21.77	2.41	3.73	26.78	103.278	85.22	86.98	86.9	76.05	21.36	14.21	51.13	1	0	0	0
PGAL8A_00406400	2439	30.747	1689	0.692497	0.02	0.0173	0.0296	3660	3308	3680	PF3D7_0215800	origin recognition complex subunit 5	PfORC5	3.87	1.47	18.01	4.35	2.97	11.81	10.88	18.0125	33.04	29.05	52.71	46.95	26.16	29.89	32.94	0	0	0	1
PGAL8A_00406500	771	5.52	432	0.560311	0.0386	0.0509	0.1402	2919	2533	1317	PF3D7_0215900	palmitoyltransferase DHHC11, putative		1.87	0.2	9.35	4.13	17.28	91.61	26.8	91.6132	9.26	4.85	36.32	45.96	67.09	79.52	51.19	0	0	0	1
PGAL8A_00406600	4959	115.316	2517	0.507562	0.0595	0.1545	0.0637	2159	961	2789	PF3D7_0216000	DEAD/DEAH box helicase, putative		3.38	0.37	6.45	0.83	2.24	54.5	369.51	369.508	28.51	10.14	28.93	21.41	19.89	70.09	94.77	0	0	1	0
PGAL8A_00406700	3165	18.094	753	0.237915	0.2398	0.233	0.4687	129	482	63	PF3D7_0216100	conserved Plasmodium protein, unknown function		4.21	1.43	8.16	2.4	6.1	22.59	5.13	22.5885	35.9	28.46	33.27	35.92	44.31	48.31	23.03	0	0	0	1
PGAL8A_00406800	609	9.933	303	0.497537	0.1232	2.4991	0.0555	780	3	3004	PF3D7_0216200	conserved Plasmodium protein, unknown function		19.99	19.24	15.76	1.72	6.59	23.67	20.46	23.6673	69.81	71.51	49.35	30.6	46.3	49.71	44.57	0	0	0	1
PGAL8A_00406900	3402	5.492	1326	0.389771	0.1859	0.1486	0.1868	273	1015	794	PF3D7_0216300	conserved Plasmodium protein, unknown function		11.15	10.02	5.86	0.35	2.28	6.64	4.39	11.1538	59.43	59.84	27.12	15.09	20.2	19.4	21.55	0	0	0	1
PGAL8A_00407000	2028	26.357	1461	0.720414	0.0465	0.0608	0.0274	2633	2317	3736	PF3D7_0216400	vacuolar protein sorting-associated protein 45, putative		4.43	2.08	20.56	9.35	8.01	26.14	8.39	26.1447	37.61	33.72	56.27	61.55	50.84	52.12	28.82	0	0	0	1
PGAL8A_00407200	5076	27.802	1440	0.283688	0.1511	0.1914	0.2584	472	684	371	PF3D7_0216500	conserved Plasmodium protein, unknown function		4.17	1	4.86	2.38	1.56	11.36	59.86	59.8575	35.59	23.33	24.03	35.76	14.56	28.9	69.15	0	0	0	1
PGAL8A_00407300	1644	71.454	534	0.324818	0.0528	0.0201	0.0624	2380	3260	2813	PF3D7_0216600	MtN3-like protein		31.76	26.82	56.1	38.22	11.9	24.88	176.5	176.504	77.36	76.77	78.4	83.33	59.67	50.84	87.76	1	0	1	0
PGAL8A_00407500	2448	3.525	1593	0.650735	0.0296	0.1368	0.0486	3273	1130	3168	PF3D7_0216800	TMEM121 domain-containing protein, putative		3.1	0.54	37.44	174.04	3	3.28	1.66	174.043	25.15	15.06	70.26	94.01	26.35	13.52	15.3	1	0	0	0
PGAL8A_00407600	1449	16.303	387	0.267081	0.1208	0.0778	0.1255	800	1970	1564	PF3D7_0216900	conserved Plasmodium protein, unknown function		2.34	0.34	14.41	3.92	5	13.39	5.09	14.4133	15.14	8.95	46.79	44.98	39.07	33.22	22.97	0	0	0	1
PGAL8A_00407700	2478	5.701	816	0.329298	0.0936	0.092	0.094	1213	1705	2114	PF3D7_0217000	conserved Plasmodium membrane protein, unknown function		1.42	0.08	6.88	1.91	15.57	35.45	3.82	35.4541	5.63	2.87	30.14	32.08	65.21	60.2	20.32	0	0	0	1
PGAL8A_00407800	1641	346.733	1467	0.893967	0.0058	0.0102	0.021	4128	3447	3912	PF3D7_0217100	ATP synthase F1, alpha subunit		4.92	2.35	140.93	49.7	24.77	39.04	59.99	140.928	40.64	35.85	89.77	86.2	72.3	62.47	69.22	1	0	0	0
PGAL8A_00407900	4086	12.142	1530	0.374449	0.247	0.3232	0.2948	113	259	251	PF3D7_0217200	conserved Plasmodium protein, unknown function		4.78	2.31	4.57	0.75	4.76	22.23	7.7	22.2346	39.85	35.61	23.26	20.36	37.82	47.9	27.66	0	0	0	1
PGAL8A_00408000	426	7.386	324	0.760563	0.001	0	0.0055	4222	4212	4175	PF3D7_0217300	AP-2 complex subunit sigma, putative		20.09	5.77	15.07	4.83	94.48	102.63	22.99	102.626	69.9	50.39	48.28	48.57	88.38	81.43	47.22	0	1	0	0
PGAL8A_00408100	435	64.657	351	0.806897	0.0775	0.0763	0.0855	1586	2003	2287	PF3D7_0217400	conserved Plasmodium protein, unknown function		6.54	4.43	11.97	5.26	27.31	57.68	131.46	131.462	48.57	46.14	42.15	50.18	73.95	71.25	83.54	0	0	1	0
PGAL8A_00408200	1581	188.506	1446	0.914611	0.0088	0.001	0.0022	4036	3526	4206	PF3D7_0217500	calcium-dependent protein kinase 1	PfCDPK1	7.16	1.51	169.18	230.46	17.53	27.63	141.25	230.464	50.68	29.51	91.19	95.33	67.35	53.78	84.65	1	0	1	0
PGAL8A_00408300	4368	23.882	1728	0.395604	0.0755	0.1503	0.1324	1649	999	1441	PF3D7_0217600	conserved Plasmodium protein, unknown function		6	12.59	14.77	3.84	3.26	8.74	52.61	52.6072	46.34	63.72	47.6	44.5	28.11	23.71	66.38	0	0	0	1
PGAL8A_00408400	717	16.314	348	0.485356	0.0358	0.1618	0.6189	3030	902	34	PF3D7_0217700	E2F-associated phosphoprotein, putative		26.5	31.72	18.44	1.67	9.2	49.64	525.92	525.915	74.61	78.93	53.37	30.24	53.99	68.08	96.87	0	0	1	0
PGAL8A_00408500	324	206.834	273	0.842593	0.001	0.001	0.001	4222	3526	4217	PF3D7_0217800	40S ribosomal protein S26		345.71	856.78	826.46	144.23	635.05	394.03	367.06	856.783	96.68	97.65	97.52	93.11	97.01	95.03	94.7	1	1	1	0
PGAL8A_00408600	1602	21.537	1131	0.705993	0.0591	0.1546	0.0829	2172	960	2348	PF3D7_0217900	conserved Plasmodium protein, unknown function		18.47	4.93	83.45	19.41	5.64	19.45	26.01	83.4513	68.55	47.84	84.4	74.19	42.08	44	50.42	1	0	0	0
PGAL8A_00408700	996	75.655	942	0.945783	0.0112	0.001	0.0113	3953	3526	4083	PF3D7_0218000	replication factor C subunit 2, putative		6.41	8.94	123.23	33.74	29.35	39.83	596.01	596.005	48.1	57.75	88.66	82.01	75.09	63.04	97.23	1	0	1	0
PGAL8A_00408800	1050	7.042	498	0.474286	0.0293	0.1631	0.3056	3299	886	228	PF3D7_0218100	conserved Plasmodium membrane protein, unknown function		2.05	0.52	21.42	14.59	20.39	201.95	1.31	201.952	11.27	14.32	57.28	69.62	69.64	90.05	14.54	0	1	0	0
PGAL8A_00409000	1047	5.951	450	0.429799	0.0633	0.0525	0.1345	2019	2498	1410	PF3D7_0218300	apicoplast RNA methyltransferase precursor, putative		19.31	10.87	35.85	11.31	60.61	167.2	21.02	167.204	69.19	61.35	69.15	64.81	84.2	88.16	45.3	0	1	0	0
PGAL8A_00409100	1563	45.019	1203	0.769674	0.0173	0.0125	0.0255	3756	3398	3795	PF3D7_0218400	ATP-dependent RNA helicase DDX47, putative		81.21	35.58	14.91	3.65	8.53	21.35	25.68	81.2113	89.01	80.79	48.05	43.53	52.33	46.79	50.13	1	0	0	0
PGAL8A_00409200	306	9.255	261	0.852941	0.0315	0.0315	0.001	3211	2978	4217	PF3D7_0218500	small nuclear ribonucleoprotein Sm D2, putative	SMD2	186.94	110.64	116.98	23.05	495.95	192.61	82.3	495.945	94.44	91.14	88.21	76.86	96.33	89.6	75.77	1	1	0	0
PGAL8A_00409300	5505	15.183	1668	0.302997	0.0747	0.0316	0.0912	1668	2976	2180	PF3D7_0218600	conserved Plasmodium protein, unknown function		15.68	87.94	22.4	12.8	6.13	20.87	11.95	87.9383	65.54	89.56	58.35	66.99	44.38	45.84	34.38	1	0	0	0
PGAL8A_00409400	1425	79.173	864	0.606316	0.0179	0.0142	0.0322	3731	3362	3620	PF3D7_0218700	pre-mRNA-processing protein 45, putative	SNW1	25.79	27.47	22.04	5.07	11.23	34.99	109.11	109.111	74.33	77.17	57.95	49.46	58.44	59.93	80.98	0	0	1	0
PGAL8A_00409900	177	124.441	171	0.966102	0.0028	0	0.001	4200	4212	4217	PF3D7_0219200	40S ribosomal protein S30		210.55	542.94	451.9	58.12	359.73	68.46	387.33	542.942	94.89	96.5	95.9	87.43	95.33	74.5	95.1	1	1	1	0
PGAL8A_00410000	366	5.567	153	0.418033	0.1299	0.001	0.1885	680	3526	784	PF3D7_0219300	conserved Plasmodium protein, unknown function		9.94	6.99	8.03	2.1	41.89	251.57	3.33	251.574	57.56	53.56	33.03	33.86	79.57	92	19.45	0	1	0	0
PGAL8A_00410200	936	27.196	348	0.371795	0.113	0.001	0.0627	889	3526	2807	PF3D7_0219500	pseudouridine synthase, putative		2.36	5.46	38.19	8.09	21.63	37.27	85.3	85.2962	15.42	49.51	70.61	58.78	70.4	61.4	76.46	0	0	0	1
PGAL8A_00410300	2634	137.382	1734	0.658314	0.0268	0.0206	0.0376	3397	3247	3463	PF3D7_0219600	replication factor C subunit 1, putative		3.19	3.04	39.25	13.53	2.75	5.36	56.17	56.1714	26.21	39.78	71.21	68.24	24.37	17.21	67.84	0	0	0	1
PGAL8A_00001500	1113	5.958	582	0.522911	0.079	0.0398	0.0891	1549	2764	2215	PF3D7_0301900	conserved Plasmodium protein, unknown function		2.27	1.85	4.4	0.74	9.37	38.87	0	38.8718	14.06	32.09	22.73	20.24	54.32	62.28	6.4	0	0	0	1
PGAL8A_00001600	1788	41.968	1392	0.778523	0.0304	0.0179	0.0294	3243	3297	3684	PF3D7_0302000	pre-mRNA-splicing factor PRP46, putative		50.43	43.85	40.39	7.17	15.98	23.98	26.38	50.4282	84.27	83.28	71.91	56.47	65.69	50.1	50.67	1	0	0	0
PGAL8A_00001700	4062	167.27	1974	0.485968	0.1017	0.1069	0.0803	1081	1483	2404	PF3D7_0302100	serine/threonine protein kinase	CLK4	26.71	49.45	49.58	7.17	6.73	31.35	43.89	49.5752	74.73	84.7	75.9	56.45	46.89	57.21	62.7	1	0	0	0
PGAL8A_00001900	3819	10.299	2028	0.531029	0.0862	0.179	0.1299	1388	765	1486	PF3D7_0302600	ABC transporter B family member 4, putative	MDR4	2.01	4.22	14.42	3.8	1.96	6.46	2.73	14.4179	10.82	45.23	46.81	44.24	17.54	19.14	17.72	0	0	0	1
PGAL8A_00002000	456	29.378	300	0.657895	0.0551	0.001	0.0761	2307	3526	2490	PF3D7_0302700	CDGSH iron-sulfur domain-containing protein, putative	PfMNL1	4.32	5.53	26.89	15.37	38.09	46.67	6.1	46.6732	36.78	49.75	62.58	70.31	78.47	66.99	24.74	0	0	0	1
PGAL8A_00002100	1332	71.992	711	0.533784	0.0434	0.0209	0.0806	2733	3241	2394	PF3D7_0302800	conserved Plasmodium protein, unknown function		24.61	8.43	9.47	1.87	3.49	16.54	0	24.6057	73.45	56.78	36.61	31.76	29.95	39.26	6.4	0	0	0	1
PGAL8A_00002200	3687	126.954	3288	0.891782	0.0078	0.0031	0.0039	4058	3522	4195	PF3D7_0302900	exportin-1, putative		49.38	20.15	83.58	33.02	19.75	16.3	14.86	83.5804	83.97	72.44	84.42	81.81	69.34	38.6	38.1	1	0	0	0
PGAL8A_00002300	2307	40.205	1866	0.808843	0.0342	0.0158	0.0481	3109	3337	3180	PF3D7_0303000	N-ethylmaleimide-sensitive fusion protein		6.26	2.9	11.79	2.5	4.16	4.41	8.33	11.7908	47.41	39.12	41.79	36.78	34.46	15.51	28.69	0	0	0	1
PGAL8A_00002400	3669	23.409	1557	0.424366	0.1525	0.0565	0.1615	456	2405	1045	PF3D7_0303100	conserved Plasmodium protein, unknown function		2.41	3.45	7.55	3.13	1.32	7.55	6.15	7.5518	16.13	42.01	31.73	40.57	12.82	21.05	24.81	0	0	0	1
PGAL8A_00002500	2736	78.475	1530	0.559211	0.028	0.0081	0.011	3342	3482	4089	PF3D7_0303200	HAD superfamily protein, putative		6.49	10.43	101.18	52.23	13.11	17.81	117.9	117.898	48.36	60.65	86.71	86.57	61.76	41.32	82.22	1	0	1	0
PGAL8A_00002600	456	46.992	348	0.763158	0.0031	0.001	0.0172	4190	3526	3989	PF3D7_0303300	DNA-directed RNA polymerases I, II, and III subunit RPABC2, putative		42.93	31.41	41.5	5.09	56.65	62.11	57.54	62.1066	82.05	78.78	72.55	49.49	83.49	72.98	68.27	1	1	0	0
PGAL8A_00002700	1830	33.117	1596	0.872131	0.0398	0.0733	0.1312	2878	2053	1464	PF3D7_0303400	palmitoyltransferase DHHC1	AnkDHHC	3.61	0.56	39.83	28.9	26.97	46.66	6.8	46.6616	30.95	15.44	71.44	80.09	73.74	66.97	26.1	1	0	0	0
PGAL8A_00002800	5364	58.053	2544	0.474273	0.0587	0.0278	0.0577	2185	3079	2945	PF3D7_0303500	spindle pole body protein, putative		3.06	2.55	16.64	6.47	9.4	58.55	16.13	58.5451	24.79	37.22	50.8	54.37	54.46	71.56	39.76	0	0	0	1
PGAL8A_00002900	531	14.518	360	0.677966	0.0336	0.001	0.105	3145	3526	1913	PF3D7_0303600	plasmoredoxin		1.74	5.58	5.18	4.35	15.48	38.24	0	38.2361	7.97	49.87	25	46.95	65.12	61.92	6.4	0	0	0	1
PGAL8A_00003000	1416	151.168	855	0.603814	0.0738	0.2238	0.0491	1698	526	3156	PF3D7_0303700	lipoamide acyltransferase component of branched-chain alpha-keto acid dehydrogenase complex	BCDH-E2	6.28	39.03	95.12	50.19	29.31	52.03	148.53	148.535	47.5	81.84	86.1	86.29	75.07	69.1	85.48	1	0	1	0
PGAL8A_00003100	1689	15.053	1098	0.650089	0.0577	0.1733	0.0821	2218	811	2371	PF3D7_0303800	IBR domain protein, putative		3.28	11.44	13.11	3.46	4.07	40.74	52.6	52.6049	27.38	62.25	44.68	42.39	34	63.67	66.37	0	0	0	1
PGAL8A_00003200	582	4.758	453	0.778351	0.0792	0.2025	0.1238	1544	622	1597	PF3D7_0303900	phosphatidylethanolamine-binding protein, putative		3.51	0.13	8.73	1.98	210.87	1965.01	1036.4	1965.01	30	3.74	34.59	32.8	93.44	98.81	98.7	0	1	1	0
PGAL8A_00003300	2433	1.09	1131	0.464858	0.1464	0.0571	0.0666	504	2391	2713	PF3D7_0304000	inner membrane complex protein 1a, putative	PfIMC1a	3.03	0.58	2.58	1.02	1.57	2.66	4.87	4.8693	24.42	16.08	17.5	23.6	14.66	12.52	22.69	0	0	0	1
PGAL8A_00003400	1452	77.175	810	0.557851	0.0387	0.0816	0.0487	2914	1893	3165	PF3D7_0304100	inner membrane complex protein 1e, putative	ALV2	2.18	0.2	20.49	21.79	22.44	718	1210.28	1210.28	12.86	4.79	56.17	76.08	70.97	97.07	99	0	1	1	0
PGAL8A_00003500	1578	43.285	1518	0.961977	0.0241	0.001	0.0284	3504	3526	3705	PF3D7_0304200	EH domain-containing protein	PfPast-1	38.17	28.49	33.9	20.49	16.59	29.61	108.17	108.171	80.28	77.62	68.03	75.06	66.3	55.57	80.84	1	0	1	0
PGAL8A_00003600	3528	14.596	1422	0.403061	0.3542	0.4145	0.4496	33	168	70	PF3D7_0304300	conserved Plasmodium protein, unknown function		3.24	0.57	3.32	1.3	1.64	5.36	1.63	5.3552	26.9	15.84	19.65	26.73	15.35	17.19	15.18	0	0	0	1
PGAL8A_00003800	507	13.39	411	0.810651	0.0342	0.0397	0.1886	3109	2765	783	PF3D7_0304500	1-cys-glutaredoxin-like protein-1	PfGLP1	4.65	8.76	17.54	3.42	24.94	12.4	89.48	89.4794	39	57.34	52.09	42.12	72.44	31.23	77.63	0	0	0	1
PGAL8A_00003900	1518	0.705	279	0.183794	0.2579	0.3405	0.5371	99	241	46	PF3D7_0304600	circumsporozoite (CS) protein	PfCSP	20.28	27.23	58.31	53.66	196.45	22.89	51.56	196.455	70.07	76.98	79.23	86.81	93.16	48.71	65.97	1	1	0	0
PGAL8A_00004100	3741	2.406	1119	0.299118	0.1735	0.5213	0.4311	327	97	79	PF3D7_0304800	conserved Plasmodium membrane protein, unknown function		2.12	0.44	4.85	1.76	3.09	11.77	3.22	11.7681	12.07	12.31	24.01	30.83	27	29.79	19.01	0	0	0	1
PGAL8A_00004200	513	7.253	240	0.467836	0.0352	0.0488	0.0298	3063	2578	3676	PF3D7_0304900	conserved Plasmodium protein, unknown function		33.37	46.52	20.53	3.44	18.65	40.63	32.73	46.5235	78.15	83.87	56.21	42.26	68.34	63.56	55.48	1	0	0	0
PGAL8A_00004300	1071	39.509	693	0.647059	0.0684	0.0262	0.1024	1854	3110	1966	PF3D7_0305000	elongation factor Ts		10.15	10.21	33.25	7.27	6.66	34.87	40.55	40.5545	57.85	60.15	67.37	56.9	46.58	59.82	60.71	0	0	0	1
PGAL8A_00004400	11292	47.102	3054	0.270457	0.1142	0.2018	0.19	872	626	770	PF3D7_0305100	conserved Plasmodium protein, unknown function		4.24	13.07	15.49	6.03	7.1	33.93	13.48	33.9282	36.14	64.51	48.87	53.21	48.28	59.18	36.3	0	0	0	1
PGAL8A_00004500	5340	90.47	933	0.174719	0.1833	0.0913	0.2512	283	1721	404	PF3D7_0305200	conserved Plasmodium protein, unknown function		17.89	17.99	16.87	20.37	4.18	27.3	20.86	27.2953	68.08	70.3	51.13	74.95	34.53	53.4	45.06	0	0	0	1
PGAL8A_00004600	1815	15.915	711	0.391736	0.079	0.0184	0.0345	1549	3293	3554	PF3D7_0305300	conserved Plasmodium membrane protein, unknown function		84.1	32.4	30.24	9.83	13.06	41.9	34.6	84.0995	89.3	79.18	65.54	62.66	61.66	64.55	56.85	1	0	0	0
PGAL8A_00004700	366	97.127	237	0.647541	0.0125	0.001	0.059	3913	3526	2914	PF3D7_0305400	conserved Plasmodium protein, unknown function		25.74	10.14	48.28	18.12	239.52	138.77	41.53	239.525	74.31	60.02	75.49	73.03	93.82	86	61.49	0	1	0	0
PGAL8A_00004800	9075	22.562	4032	0.444298	0.0613	0.026	0.0264	2089	3116	3770	PF3D7_0305500	conserved Plasmodium protein, unknown function		43.01	110.32	44.65	46.45	10.58	24.18	28.33	110.323	82.07	91.1	73.95	85.56	57.21	50.25	52.31	1	0	0	0
PGAL8A_00004900	1581	58.026	906	0.573055	0.045	0.0832	0.0529	2684	1868	3068	PF3D7_0305600	AP endonuclease (DNA-[apurinic or apyrimidinic site] lyase), putative		5.12	1.97	50.69	25.52	3.86	111.94	123.01	123.009	41.98	32.92	76.44	78.31	32.75	82.9	82.81	0	1	1	0
PGAL8A_00005000	429	230.823	417	0.972028	0.0102	0.001	0.0166	3990	3526	4001	PF3D7_0305700	ubiquitin-conjugating enzyme E2, putative		66.92	216.43	451.54	227.46	415.79	363.8	195.68	451.545	87.21	94.25	95.88	95.27	95.66	94.62	88.85	1	1	1	0
PGAL8A_00005100	3123	11.383	1572	0.503362	0.0638	0.0726	0.0676	2003	2074	2679	PF3D7_0305800	P-loop containing nucleoside triphosphate hydrolase, putative		3.4	0.47	1.13	0.18	4.9	18.55	25.93	25.9331	28.77	13.05	11.51	11.91	38.58	42.5	50.35	0	0	0	1
PGAL8A_00005300	411	19.331	345	0.839416	0.0356	0.001	0.0752	3044	3526	2508	PF3D7_0306000	conserved Plasmodium protein, unknown function		6.56	1.92	60.23	36.92	189.66	74.22	20.28	189.659	48.66	32.62	79.76	83	93.08	75.92	44.21	1	1	0	0
PGAL8A_00005400	3453	92.302	378	0.10947	0.0361	0	0.0952	3015	4212	2097	PF3D7_0306100	conserved Plasmodium protein, unknown function		21.24	14.29	21.15	4.52	4.08	34.52	33.37	34.5212	70.97	66.18	56.88	47.48	34.05	59.67	55.96	0	0	0	1
PGAL8A_00005500	1041	79.148	783	0.752161	0.0677	0.0746	0.1838	1877	2029	835	PF3D7_0306200	activator of Hsp90 ATPase		16.7	13.06	17.79	1.68	31.21	642.18	234.52	642.183	66.76	64.48	52.4	30.39	75.9	96.83	90.58	0	1	1	0
PGAL8A_00005600	330	146.316	273	0.827273	0.1907	0.232	0.119	254	493	1666	PF3D7_0306300	glutaredoxin 1		97.24	212.15	381.09	66.48	1076.47	523.63	328.96	1076.47	90.72	94.2	95.27	88.61	97.99	96.14	93.91	1	1	1	0
PGAL8A_00005700	1860	69.03	1626	0.874194	0.0289	0.0349	0.0277	3313	2885	3730	PF3D7_0306400	FAD-dependent glycerol-3-phosphate dehydrogenase, putative		3.19	1.86	68.07	79.84	2.3	8.35	22.11	79.8443	26.22	32.16	81.67	89.87	20.37	22.81	46.36	1	0	0	0
PGAL8A_00005800	843	126.685	627	0.743772	0.0338	0.0308	0.0305	3134	3005	3659	PF3D7_0306500	conserved Plasmodium protein, unknown function		4.29	1.76	76.44	45.07	39.71	57.84	54.41	76.439	36.51	31.53	83.31	85.32	78.99	71.28	67.16	1	0	0	0
PGAL8A_00005900	258	14.788	213	0.825581	0.0468	0.0843	0.0337	2625	1846	3575	PF3D7_0306600	conserved Plasmodium protein, unknown function		1.21	1.84	65.39	126.45	148.33	198.01	10.85	198.006	4.55	32.02	81.24	92.47	91.66	89.8	32.87	1	1	0	0
PGAL8A_00006000	351	35.186	309	0.880342	0.1132	0.0952	0.0641	886	1655	2770	PF3D7_0306700	membrane magnesium transporter, putative		53.83	42.02	63.3	9.21	112.79	90.31	59.79	112.79	84.97	82.64	80.57	61.35	89.91	79.31	69.08	1	1	0	0
PGAL8A_00006100	1599	263.155	1488	0.930582	0.0053	0.0086	0.0093	4142	3473	4119	PF3D7_0306800	T-complex protein 1 subunit beta	TCP1-b	141.01	182.69	156.36	14.13	12.42	12.28	27.07	182.686	93.27	93.54	90.67	69.05	60.5	30.9	51.31	1	0	0	0
PGAL8A_00006200	438	322.686	384	0.876712	0.001	0.001	0.001	4222	3526	4217	PF3D7_0306900	40S ribosomal protein S23, putative		1185.69	2679.78	1588.51	1048.82	1948.84	243.01	319.44	2679.78	99.13	99.27	98.74	98.41	98.63	91.57	93.77	1	1	1	0
PGAL8A_00006400	426	542.306	360	0.84507	0.0079	0.001	0.0178	4056	3526	3973	PF3D7_0307100	40S ribosomal protein S12, putative		380.55	949.82	630.12	115.91	528.43	170.89	134.66	949.817	97.01	97.89	96.97	91.95	96.45	88.38	83.87	1	1	1	0
PGAL8A_00006500	774	690.846	477	0.616279	0.0263	0.1479	0.0112	3419	1020	4084	PF3D7_0307200	60S ribosomal protein L7, putative		588.03	882.75	551.69	251	438.75	227.56	300.07	882.753	98.11	97.72	96.59	95.74	95.93	91.05	93.25	1	1	1	0
PGAL8A_00006600	1254	28.467	729	0.58134	0.0513	0.0205	0.0347	2428	3248	3551	PF3D7_0307300	microtubule-associated protein RP/EB family, putative		2.59	0.62	1.02	1.53	2.8	31.68	165.19	165.195	18.38	16.88	10.96	29.17	24.68	57.57	86.91	0	0	1	0
PGAL8A_00006800	1011	18.394	525	0.519288	0.0505	0.0784	0.0736	2463	1960	2550	PF3D7_0307400	ATP-dependent Clp protease proteolytic subunit	PfClpP	4.13	4.7	32.68	13.73	6.92	32.66	27.66	32.6797	35.19	47.15	67.01	68.53	47.5	58.3	51.72	0	0	0	1
PGAL8A_00006900	918	108.297	639	0.696078	0.0872	0.2193	0.1378	1364	537	1359	PF3D7_0307500	conserved protein, unknown function		1.61	2.98	27.36	14.57	8.93	15.16	31.09	31.0918	6.91	39.54	62.99	69.55	53.45	36.77	54.32	0	0	0	1
PGAL8A_00007000	1704	17.544	615	0.360915	0.1498	0.1735	0.1993	480	809	689	PF3D7_0307600	conserved Plasmodium protein, unknown function		2.75	3.4	40.5	21.51	9.86	25.05	29.97	40.5028	20.72	41.72	71.99	75.87	55.51	51.06	53.57	0	0	0	1
PGAL8A_00007100	4701	134.074	1164	0.247607	0.0741	0.1122	0.1869	1691	1421	792	PF3D7_0307700	conserved Plasmodium protein, unknown function		7.45	50.01	356.71	400.62	18.02	36.93	46.71	400.622	51.5	84.87	94.93	97.09	67.79	61.24	64.12	1	0	0	0
PGAL8A_00007200	1938	58.292	1014	0.52322	0.0732	0.0495	0.0673	1721	2563	2691	PF3D7_0307800	conserved Plasmodium protein, unknown function		17.05	15.63	42.28	11.34	10.89	8.82	46.64	46.6377	67.2	67.75	72.81	64.88	57.82	23.85	64.04	0	0	0	1
PGAL8A_00007300	11478	7.938	3921	0.34161	0.1544	0.1988	0.1507	442	649	1164	PF3D7_0307900	conserved Plasmodium protein, unknown function		3.29	2.77	2.12	0.32	2.27	14.66	9.26	14.6597	27.57	38.43	15.96	14.23	20.13	35.69	30.1	0	0	0	1
PGAL8A_00007400	1350	91.152	1110	0.822222	0.041	0.0144	0.0777	2834	3358	2454	PF3D7_0308000	DNA polymerase delta small subunit, putative		3.28	12.71	31.66	5.5	17.04	28.56	14.02	31.663	27.32	63.93	66.44	51.22	66.85	54.72	37.03	0	0	0	1
PGAL8A_00007500	5586	132.41	2145	0.383996	0.0621	0.158	0.1927	2061	932	750	PF3D7_0308100	zinc finger protein, putative		3.33	0.31	17.98	24.89	2.1	5	69.19	69.1939	28.04	8.15	52.66	77.86	18.52	16.6	72.41	0	0	0	1
PGAL8A_00007600	1620	195.938	1485	0.916667	0.0021	0.012	0.0129	4209	3406	4056	PF3D7_0308200	T-complex protein 1 subunit eta	TRiCeta	153.17	184.03	162.55	46.45	28.44	13.88	111.41	184.033	93.66	93.58	90.98	85.58	74.54	34.27	81.29	1	0	1	0
PGAL8A_00007900	423	68.269	363	0.858156	0.0766	0.001	0.0576	1608	3526	2947	PF3D7_0308500	activator of Hsp90 ATPase, putative		27.64	209.19	137.74	29.88	631.49	133.83	95.92	631.486	75.42	94.13	89.61	80.51	96.95	85.46	78.69	1	1	0	0
PGAL8A_00008000	1497	54.986	1362	0.90982	0.0218	0.0366	0.0462	3578	2847	3231	PF3D7_0308600	pre-mRNA-processing factor 19, putative	PRP19	66.72	59.56	91.4	15.99	6.12	5.46	60.38	91.3999	87.14	86.48	85.58	70.97	44.37	17.4	69.38	1	0	0	0
PGAL8A_00008100	1302	34.678	846	0.64977	0.0831	0.0918	0.1092	1453	1711	1825	PF3D7_0308700	conserved Plasmodium protein, unknown function		4.52	0.75	19.08	60.01	6.17	7.41	175.96	175.956	38.26	19.56	54.2	87.69	44.52	20.82	87.69	1	0	1	0
PGAL8A_00008200	327	18.163	318	0.972477	0.0457	0.2858	0.1031	2661	339	1954	PF3D7_0308800	conserved protein, unknown function		9.9	2.42	57.13	62.02	104.59	195.36	154.03	195.356	57.43	36.37	78.8	87.97	89.37	89.67	86	1	1	1	0
PGAL8A_00008300	3846	57.642	2910	0.75663	0.0094	0.0437	0.0126	4022	2672	4063	PF3D7_0308900	splicing factor 3B subunit 1, putative		52.33	50.31	46.5	18.58	4.78	6.73	24.55	52.332	84.58	85.01	74.64	73.41	37.98	19.58	49	1	0	0	0
PGAL8A_00008400	1566	26.764	984	0.628352	0.0799	0.081	0.0545	1528	1904	3027	PF3D7_0309000	dual specificity protein phosphatase	PfYVH1	41.68	13.67	21.72	6.63	12.66	34.16	14.57	41.6827	81.56	65.35	57.59	54.96	61	59.37	37.86	1	0	0	0
PGAL8A_00008500	531	21.022	327	0.615819	0.0145	0.001	0.0742	3849	3526	2533	PF3D7_0309100	conserved Plasmodium protein, unknown function		6.22	1.62	10.42	3.83	264.79	355.07	145.91	355.074	47.19	30.48	38.65	44.43	94.24	94.37	85.1	0	1	1	0
PGAL8A_00008600	5085	55.744	1371	0.269617	0.107	0.2318	0.1336	989	497	1422	PF3D7_0309200	serine/threonine protein kinase, putative	Pfark-2	6.26	5.04	33.26	10.68	14.14	57.85	437.28	437.282	47.43	48.21	67.41	64.03	63.23	71.32	95.91	0	0	1	0
PGAL8A_00008700	2370	63.732	1197	0.505063	0.0183	0.2205	0.038	3718	534	3449	PF3D7_0309300	N2227-like protein, putative		21.18	13.41	40.72	24.19	7.32	5.78	15.61	40.715	70.89	64.95	72.06	77.48	48.97	17.88	39.02	0	0	0	1
PGAL8A_00008800	1731	581.318	1623	0.937608	0.0345	0.0152	0.0306	3098	3345	3653	PF3D7_0309500	asparagine synthetase [glutamine-hydrolyzing], putative		237.42	205.17	330.24	335.92	18.84	8.25	51.14	335.921	95.38	94.06	94.55	96.73	68.55	22.62	65.81	1	0	0	0
PGAL8A_00008900	336	231.101	219	0.651786	0.0622	0.001	0.0253	2057	3526	3803	PF3D7_0309600	60S acidic ribosomal protein P2		668.82	2945.93	1610.13	1763.47	2188.38	454.66	1180.39	2945.93	98.37	99.32	98.75	98.89	98.77	95.67	98.96	1	1	1	0
PGAL8A_00009000	1305	8.656	477	0.365517	0.0619	0.001	0.124	2063	3526	1592	PF3D7_0309700	SECIS-binding protein 2, putative		15.54	3.82	5.5	0.64	6.44	22.28	46.71	46.7143	65.48	43.85	25.9	19.13	45.82	48.02	64.12	0	0	0	1
PGAL8A_00009100	834	12.498	543	0.651079	0.0119	0.001	0.0842	3935	3526	2321	PF3D7_0309800	YTH domain-containing protein, putative		52.88	31.7	62.77	10.46	134.63	92.68	86.3	134.626	84.75	78.88	80.46	63.68	90.95	79.71	76.75	1	1	0	0
PGAL8A_00009200	4188	19.555	1617	0.386103	0.1396	0.3556	0.2874	577	221	278	PF3D7_0309900	conserved Plasmodium protein, unknown function		2.27	1.06	6.78	1.93	2.04	13.16	136.24	136.236	14	24.1	29.83	32.25	18.11	32.72	84.07	0	0	1	0
PGAL8A_00009300	588	23.238	399	0.678571	0.1114	0.6967	0.0944	906	49	2105	PF3D7_0310000	50S ribosomal protein L9, apicoplast, putative		1.58	1.87	23.14	6.43	49.62	290.32	183.72	290.321	6.76	32.28	59.04	54.31	81.76	93.11	88.23	0	1	1	0
PGAL8A_00009400	1665	1.885	1368	0.821622	0.0219	0.0475	0.0437	3575	2596	3302	PF3D7_0310100	calcium-dependent protein kinase 3	PfCDPK3	4.7	4.13	5.41	3.31	21.1	5.74	1981.48	1981.48	39.28	44.88	25.64	41.6	70.12	17.74	99.5	0	0	1	0
PGAL8A_00009500	14928	65.335	2646	0.177251	0.1256	0.1257	0.1398	745	1244	1321	PF3D7_0310200	phd finger protein, putative // phd finger protein, putative		56.89	121.03	33.08	7.23	5.22	15.2	41.5	121.03	85.72	91.76	67.21	56.72	40.28	36.85	61.45	1	0	0	0
PGAL8A_00009600	3036	187.652	1752	0.577075	0.0606	0.0993	0.0374	2123	1598	3470	PF3D7_0310300	phosphoglycerate mutase, putative		38.05	35.16	14.82	2.77	7.83	39.16	76	75.9963	80.23	80.58	47.81	38.58	50.46	62.56	74.29	1	0	0	0
PGAL8A_00009700	3093	67.291	1773	0.57323	0.103	0.0202	0.1501	1059	3257	1180	PF3D7_0310400	parasite-infected erythrocyte surface protein // TVN-junction protein 1	TVN-JP1	5.19	1.39	86.65	49.63	2.21	18.16	57.98	86.6543	42.27	27.97	84.8	86.19	19.54	41.89	68.51	1	0	0	0
PGAL8A_00010000	438	59.047	393	0.89726	0.0226	0.001	0.0084	3552	3526	4130	PF3D7_0310700	trafficking protein particle complex subunit 4, putative	TRS23	26.69	44.17	111.6	14.76	22.6	61.53	38.33	111.6	74.69	83.34	87.71	69.83	71.01	72.74	59.38	1	0	0	0
PGAL8A_00010100	330	20.81	264	0.8	0.2111	0	0.0913	191	4212	2178	PF3D7_0310800	conserved Plasmodium protein, unknown function		31.95	65.6	138.65	32.06	33.32	79.02	97.52	138.648	77.48	87.35	89.65	81.39	76.86	77.27	78.92	1	0	0	0
PGAL8A_00010200	2130	127.352	1188	0.557746	0.1085	0.0521	0.1074	966	2509	1858	PF3D7_0310900	conserved Plasmodium protein, unknown function		8.36	2.92	29	12.2	3.59	32.72	67.56	67.5566	53.87	39.28	64.46	66.28	30.79	58.32	71.91	0	0	0	1
PGAL8A_00010300	567	3.774	489	0.862434	0.1685	1.2949	0.1469	351	9	1226	PF3D7_0311000	conserved Plasmodium protein, unknown function		3.04	0.51	1.2	0.48	39.33	20.7	83.77	83.7669	24.55	14.12	11.82	16.57	78.9	45.71	76.16	0	0	0	1
PGAL8A_00010400	1584	92.311	318	0.200758	0.0327	0.0526	0.0608	3179	2497	2860	PF3D7_0311100	pre-mRNA splicing factor, putative		31.9	49.74	50.43	8.48	8.11	12.04	157.53	157.529	77.46	84.8	76.32	59.63	51.12	30.4	86.29	1	0	1	0
PGAL8A_00010500	3663	18.402	1851	0.505324	0.1098	0.169	0.1686	933	841	969	PF3D7_0311200	valine--tRNA ligase, putative		3.84	12.11	9.87	3.44	5.14	14.72	45	45.0013	32.87	63.1	37.41	42.26	39.9	35.84	63.29	0	0	0	1
PGAL8A_00010600	2760	69.992	1743	0.631522	0.0135	0.0394	0.0338	3882	2773	3572	PF3D7_0311300	phosphatidylinositol 3- and 4-kinase, putative		4.78	5.01	107.08	81.23	22.94	34.51	108.53	108.528	39.81	48.16	87.26	90.01	71.2	59.65	80.87	1	0	1	0
PGAL8A_00010700	8928	36.353	2355	0.263777	0.1094	0.2813	0.2425	942	349	430	PF3D7_0311400	protein kinase, putative		3.35	0.34	1.19	2.34	3.1	19.97	218.92	218.916	28.24	8.93	11.75	35.43	27.11	44.66	89.91	0	0	1	0
PGAL8A_00010800	243	6.442	63	0.259259	0.0115	0.001	0.001	3944	3526	4217	PF3D7_0311500	conserved Plasmodium protein, unknown function		42.43	7.09	11.71	1.19	20.12	272.29	102.38	272.29	81.88	53.8	41.61	25.44	69.5	92.54	79.75	1	1	0	0
PGAL8A_00010900	1971	10.596	1212	0.614916	0.0793	0.1512	0.1627	1539	989	1036	PF3D7_0311600	dolichyl-diphosphooligosaccharide--protein glycosyltransferase subunit 1, putative		3.42	1.47	9.64	0.7	20.7	105.16	43.79	105.164	28.91	28.96	36.99	19.73	69.81	81.72	62.61	0	1	0	0
PGAL8A_00011000	1290	20.459	1095	0.848837	0.059	0.1168	0.1683	2178	1361	976	PF3D7_0311700	plasmepsin VI		3.62	0.79	8.36	1.36	522.76	2002.09	374.83	2002.09	31.02	20.35	33.77	27.32	96.42	98.84	94.84	0	1	1	0
PGAL8A_00011100	1701	590.035	1293	0.760141	0.0434	0.2488	0.0796	2733	428	2421	PF3D7_0311800	conserved protein, unknown function		3.02	0.61	40.92	15.1	11.3	48.63	49.7	49.696	24.34	16.57	72.17	70.12	58.59	67.82	65.4	0	0	0	1
PGAL8A_00011200	2034	4.436	1032	0.507375	0.0455	0.14	0.1072	2669	1091	1862	PF3D7_0311900	conserved Plasmodium protein, unknown function		2.53	2.51	4.85	2.68	2.67	11.39	4.85	11.387	17.73	36.96	23.97	37.98	23.64	28.94	22.66	0	0	0	1
PGAL8A_00011300	411	15.518	312	0.759124	0.0264	0.001	0.0273	3415	3526	3740	PF3D7_0312000	conserved Plasmodium protein, unknown function		4.83	9.26	58.26	42.91	81.88	15.09	47.66	81.8758	40.07	58.4	79.19	84.85	87.42	36.59	64.58	1	1	0	0
PGAL8A_00011400	2238	27.283	816	0.364611	0.0279	0.0307	0.0398	3348	3012	3408	PF3D7_0312100	E3 ubiquitin-protein ligase, putative		4.32	2.4	40.34	28.33	19.45	27.18	41.23	41.2329	36.8	36.13	71.89	79.85	68.96	53.21	61.28	0	0	0	1
PGAL8A_00011500	3225	18.258	1509	0.467907	0.1161	0.1772	0.1719	852	780	935	PF3D7_0312200	tetratricopeptide repeat protein, putative		1.94	0.77	6.5	1.9	4.5	23.38	39.21	39.2104	10.06	19.91	29.06	32.01	36.47	49.37	59.91	0	0	0	1
PGAL8A_00011600	1332	89.732	1020	0.765766	0.012	0.0341	0.0285	3933	2910	3702	PF3D7_0312400	glycogen synthase kinase 3	PfGSK3	11.52	39.38	290.91	160.62	103.9	133.28	306.69	306.688	60.1	81.98	94.06	93.61	89.3	85.39	93.35	1	1	1	0
PGAL8A_00011700	1818	6.915	678	0.372937	0.1609	0.0389	0.1292	391	2787	1500	PF3D7_0312500	major facilitator superfamily-related transporter, putative		10.56	34.82	15.51	3.04	14.85	16.88	33.77	34.8151	58.33	80.41	48.88	40.04	64.25	39.99	56.27	1	0	0	0
PGAL8A_00012000	384	331.907	339	0.882812	0.0215	0.001	0.001	3590	3526	4217	PF3D7_0312800	60S ribosomal protein L26, putative		408.51	738.8	363.72	163.54	1018.89	422.6	547.17	1018.89	97.28	97.33	95.08	93.66	97.92	95.33	97.04	1	1	1	0
PGAL8A_00012200	1605	54.127	222	0.138318	0.1943	0.2079	0.2917	238	588	261	PF3D7_0313000	conserved Plasmodium protein, unknown function		19.85	4.27	10.51	2.54	7.08	58.76	25.54	58.758	69.69	45.46	38.95	37.13	48.16	71.66	49.94	0	0	0	1
PGAL8A_00012300	2187	23.603	1308	0.59808	0.0235	0.0219	0.0536	3521	3212	3048	PF3D7_0313100	ubiquitin-protein ligase, putative		14.25	37.45	54.52	18.43	7.39	21.79	43.29	54.521	64	81.39	77.95	73.29	49.2	47.31	62.39	1	0	0	0
PGAL8A_00012400	699	32.681	288	0.412017	0.0591	0.3042	0.0561	2172	296	2986	PF3D7_0313200	conserved Plasmodium protein, unknown function		6.69	4.74	15.36	5.44	20.83	217.07	111.61	217.072	49.12	47.29	48.66	50.96	69.92	90.64	81.32	0	1	1	0
PGAL8A_00012500	579	7.907	237	0.409326	0.0743	0.001	0.1859	1680	3526	804	PF3D7_0313300	apicoplast conserved ycf19 protein precursor, unknown function		7.03	2.81	16.2	4.69	11.31	129.59	76.9	129.593	50.29	38.67	50.11	48.02	58.65	84.94	74.5	0	1	0	0
PGAL8A_00012600	1749	9.782	405	0.231561	0.0851	0.0952	0.2201	1402	1655	556	PF3D7_0313400	conserved Plasmodium protein, unknown function		9.35	9.23	6.22	1.5	5.42	50.96	313.1	313.097	56.4	58.3	28.23	28.67	41.11	68.6	93.63	0	0	1	0
PGAL8A_00012700	2406	16.959	1143	0.475062	0.0675	0.1766	0.1176	1888	784	1689	PF3D7_0313500	Ras-like G protein		7.55	7.48	8.03	0.97	1.73	13.11	132.45	132.447	51.84	54.82	33.01	22.88	15.91	32.61	83.64	0	0	1	0
PGAL8A_00012800	2448	47.613	531	0.216912	0.114	0.0366	0.0529	874	2847	3068	PF3D7_0313600	conserved Plasmodium protein, unknown function		0.76	2.93	12.54	1.65	4.87	34.48	259.45	259.447	3.01	39.31	43.47	30.02	38.38	59.6	91.64	0	0	1	0
PGAL8A_00013000	1710	62.232	957	0.559649	0.0726	0.154	0.1652	1735	966	1017	PF3D7_0313800	conserved Plasmodium protein, unknown function		2.21	5.79	30.08	5.77	6.64	14.64	37.34	37.3384	13.19	50.46	65.38	52.35	46.49	35.64	58.73	0	0	0	1
PGAL8A_00013100	2763	12.154	927	0.335505	0.0823	0.1857	0.1526	1466	721	1141	PF3D7_0313900	conserved Plasmodium protein, unknown function		1.43	0.82	1.85	0.8	5.08	15.17	11.9	15.1693	5.64	20.86	14.82	21.01	39.61	36.78	34.31	0	0	0	1
PGAL8A_00013200	1068	200.513	525	0.491573	0.0569	0.0987	0.0808	2251	1605	2389	PF3D7_0314000	co-chaperone p23		5.93	7.57	86.86	104.71	89.65	359.53	133.49	359.532	45.98	55.08	84.85	91.45	87.97	94.53	83.75	1	1	1	0
PGAL8A_00013500	3564	15.98	1254	0.351852	0.1834	0.1583	0.1746	282	929	910	PF3D7_0314200	conserved Plasmodium protein, unknown function		2.33	2.78	11	3.75	2.01	7.39	0	11.0037	14.99	38.53	40	44.07	17.9	20.79	6.4	0	0	0	1
PGAL8A_00013600	1098	8.175	729	0.663934	0.0508	0.1095	0.0727	2454	1449	2580	PF3D7_0314300	DER1-like protein	PfsDer1-2	2.46	1.05	7.33	2.81	2.67	7.92	2.06	7.9175	16.62	24.03	31.21	38.84	23.66	22.02	16.25	0	0	0	1
PGAL8A_00013700	927	90.01	879	0.94822	0.0033	0.0106	0.0072	4185	3430	4148	PF3D7_0314400	serine/threonine protein phosphatase 6, putative		37.16	24.63	36.57	10.46	61.21	37.96	27.17	61.2133	79.85	75.73	69.67	63.7	84.33	61.8	51.38	0	1	0	0
PGAL8A_00013800	669	40.296	267	0.399103	0.0328	0.5861	0.0314	3172	72	3637	PF3D7_0314500	conserved Plasmodium protein, unknown function		18.51	22.1	12.4	3.53	3.37	21.2	9.33	22.0957	68.58	74	43.19	42.79	29.1	46.46	30.25	0	0	0	1
PGAL8A_00013900	726	37.079	276	0.380165	0.1052	0.2375	0.3543	1023	464	143	PF3D7_0314600	conserved Plasmodium protein, unknown function		29.69	35.41	22.66	15.13	10.19	59.26	16.21	59.2599	76.61	80.66	58.66	70.17	56.27	71.8	39.85	1	0	0	0
PGAL8A_00014000	3117	125.048	687	0.220404	0.042	0.4232	0.274	2789	160	321	PF3D7_0314700	zinc finger protein, putative		3.33	2.53	16.55	2.74	74.37	24.44	53.27	74.3681	27.92	37.1	50.63	38.36	86.53	50.44	66.7	0	1	0	0
PGAL8A_00401500	3165	46.375	1227	0.387678	0.3367	0.1735	0.5539	43	809	41	PF3D7_0314800	conserved Plasmodium protein, unknown function		1.94	0.03	2.74	3.86	1.2	2.76	0.9	3.8585	10.02	2.44	18.05	44.68	11.96	12.76	13.55	0	0	0	1
PGAL8A_00401400	1590	28.017	507	0.318868	0.3455	0.8042	0.3665	35	35	125	PF3D7_0314900	conserved Plasmodium membrane protein, unknown function		1.42	0.65	9.5	7.2	2.93	26.4	19.81	26.3989	5.61	17.39	36.66	56.59	25.88	52.31	43.76	0	0	0	1
PGAL8A_00401300	570	17.706	357	0.626316	0.2088	0.2296	0.6572	193	503	25	PF3D7_0315000	zinc finger protein, putative		9.16	2.5	7.22	2.58	26.62	31.8	19.64	31.802	55.82	36.89	31.01	37.34	73.57	57.66	43.61	0	0	0	1
PGAL8A_00401200	684	175.937	678	0.991228	0.0304	0.001	0.0224	3243	3526	3875	PF3D7_0315100	eukaryotic translation initiation factor 4E		29.61	30.02	36.09	8.59	34.25	22.68	49.09	49.0924	76.56	78.22	69.29	59.98	77.05	48.42	65.23	0	0	0	1
PGAL8A_00401100	5652	1.635	3225	0.570594	0.1957	0.2114	0.2074	235	573	643	PF3D7_0315200	circumsporozoite- and TRAP-related protein		4.2	0.77	2.17	0.69	1.39	1.74	3783.72	3783.72	35.83	19.99	16.17	19.71	13.29	10.92	99.76	0	0	1	0
PGAL8A_00401000	4779	1.876	2007	0.419962	0.2003	0.6286	0.2764	223	65	314	PF3D7_0315300	conserved Plasmodium protein, unknown function		2.38	0.61	1.97	1	1.87	11.61	39.83	39.832	15.74	16.72	15.25	23.3	16.89	29.34	60.27	0	0	0	1
PGAL8A_00400900	669	30.337	294	0.439462	0.0913	0.0315	0.2969	1264	2978	250	PF3D7_0315400	conserved Plasmodium protein, unknown function		3.66	8.54	35.12	13.34	24.39	53.69	83.48	83.4761	31.44	56.95	68.67	67.89	71.98	69.95	76.08	0	0	0	1
PGAL8A_00400800	693	96.032	561	0.809524	0.0177	0.001	0.0905	3740	3526	2194	PF3D7_0315500	mitochondrial ribosomal protein L29/L47 precursor, putative		3.43	0.91	32.96	2.52	67.65	84.32	18.01	84.3169	29.12	21.98	67.15	37.04	85.46	78.29	42.03	0	1	0	0
PGAL8A_00400700	1170	26.82	462	0.394872	0.0544	1.1449	0.4186	2334	12	85	PF3D7_0315600	zinc finger protein, putative		4.44	1.69	44.48	11.49	6.64	5.12	81.57	81.5681	37.67	30.95	73.88	65.19	46.48	16.76	75.64	0	0	0	1
PGAL8A_00400600	2955	4.592	1674	0.566497	0.0535	0.0506	0.0822	2362	2541	2368	PF3D7_0315700	conserved Plasmodium membrane protein, unknown function		3.34	0.76	1.64	0.21	5.24	43.38	43.3	43.3818	28.18	19.82	13.99	12.39	40.38	65.52	62.4	0	0	0	1
PGAL8A_00400500	960	50.018	291	0.303125	0.0516	0.001	0.0505	2418	3526	3128	PF3D7_0315800	zinc finger protein, putative		22.53	18.27	21.96	1.61	14.22	33.28	14.02	33.2833	71.96	70.57	57.85	29.67	63.35	58.78	37.01	0	0	0	1
PGAL8A_00400400	834	0.924	483	0.579137	0.0685	0.0592	0.6912	1851	2349	22	PF3D7_0315900	conserved Plasmodium protein, unknown function		8.26	0.48	1.28	0.35	2.11	8.37	5.03	8.3686	53.68	13.07	12.29	15.03	18.66	22.83	22.88	0	0	0	1
PGAL8A_00400300	798	25.265	354	0.443609	0.0301	0.0697	0.1794	3251	2141	872	PF3D7_0316000	microneme associated antigen	PfMA	2.37	1.8	13	3.18	14.76	142.99	63.6	142.992	15.63	31.82	44.47	40.94	64.06	86.31	70.61	0	1	0	0
PGAL8A_00400200	858	32.208	576	0.671329	0.0315	0.095	0.0625	3211	1660	2812	PF3D7_0316100	mitochondrial ribosomal protein L27 precursor, putative		3.03	3.98	29.36	8.52	37.76	483.71	95.15	483.711	24.39	44.35	64.8	59.71	78.35	95.95	78.54	0	1	0	0
PGAL8A_00400100	5931	13.514	2331	0.39302	0.1286	0.2832	0.228	699	342	513	PF3D7_0316200	conserved Plasmodium protein, unknown function		2.05	1.52	15.98	8.08	5.99	28.45	22.51	28.4465	11.29	29.58	49.8	58.77	43.66	54.56	46.86	0	0	0	1
PGAL8A_00399900	2688	79.004	1389	0.516741	0.2023	0.1027	0.0966	216	1543	2077	PF3D7_0316400	conserved Plasmodium protein, unknown function		3.38	3.77	30.58	10	9.85	25.68	128.03	128.034	28.53	43.62	65.76	63.01	55.44	51.58	83.19	0	0	1	0
PGAL8A_00399800	1374	261.294	825	0.600437	0.0103	0.1268	0.0474	3988	1232	3200	PF3D7_0316500	kinetochore protein NUF2, putative		4.14	3.66	61.69	49.2	29.28	95.89	143.35	143.345	35.36	43.05	80.15	86.08	75.06	80.37	84.87	1	1	1	0
PGAL8A_00399700	948	45.332	822	0.867089	0.0607	0.0811	0.0739	2119	1902	2544	PF3D7_0316600	formate-nitrite transporter		236.84	436.02	331.91	102.39	51.56	29.08	157.97	436.015	95.33	96.17	94.56	91.28	82.26	55.19	86.37	1	1	1	0
PGAL8A_00399600	711	54.025	471	0.662447	0.034	0.001	0.0157	3123	3526	4016	PF3D7_0316700	protein YOP1, putative		27.74	93.46	170.76	253.31	43.76	22.27	63.02	253.311	75.51	90.05	91.33	95.79	80.18	47.98	70.37	1	1	0	0
PGAL8A_00399500	393	570.008	390	0.992366	0.001	0.001	0.0077	4222	3526	4139	PF3D7_0316800	40S ribosomal protein S15A, putative		405.33	861.91	786.06	183.23	1528.11	445.47	452.14	1528.11	97.27	97.66	97.37	94.29	98.46	95.59	96.11	1	1	1	0
PGAL8A_00399400	1404	63.408	867	0.617521	0.01	0.001	0.0354	3998	3526	3527	PF3D7_0316900	E3 ubiquitin-protein ligase, putative		61.43	33.64	44	13.37	3.96	32.96	15.52	61.4286	86.46	79.8	73.76	67.96	33.39	58.54	38.91	1	0	0	0
PGAL8A_00399300	762	65.306	699	0.917323	0.0189	0.0324	0.0364	3696	2955	3496	PF3D7_0317000	proteasome subunit alpha type-3, putative		51.16	42.1	155.91	110.75	455.82	421.98	71.89	455.82	84.39	82.67	90.64	91.67	96.02	95.29	73.31	1	1	0	0
PGAL8A_00399200	2424	1.256	1584	0.653465	0.1699	0.14	0.0842	342	1091	2321	PF3D7_0317100	6-cysteine protein		4.48	0.82	2.83	1.21	5.48	7.96	21.64	21.636	37.94	20.82	18.33	25.6	41.34	22.12	45.86	0	0	0	1
PGAL8A_00399100	3723	267.164	2217	0.595488	0.028	0.0628	0.0251	3342	2273	3807	PF3D7_0317200	cdc2-related protein kinase 4	Pfcrk-4	6.87	7.57	136.71	87.76	6.63	7.73	142.55	142.554	49.84	55.1	89.51	90.43	46.44	21.57	84.8	1	0	1	0
PGAL8A_00399000	8673	217.566	2637	0.304047	0.0615	0.0639	0.0668	2081	2245	2706	PF3D7_0317300	conserved Plasmodium protein, unknown function		28.16	42.13	37.36	19.22	11.97	21.48	35.72	42.1328	75.75	82.69	70.17	73.98	59.77	46.96	57.69	1	0	0	0
PGAL8A_00398900	1410	58.162	1125	0.797872	0.0137	0.0093	0.0231	3874	3462	3858	PF3D7_0317400	DNA replication complex GINS protein, putative		4.49	9.17	19.61	6.61	8.9	23.22	22.47	23.2224	38.03	58.25	54.86	54.82	53.31	49.25	46.72	0	0	0	1
PGAL8A_00398800	4191	103.056	2124	0.5068	0.0296	0.057	0.0605	3273	2398	2868	PF3D7_0317500	kinesin-5	KLP3	22.45	26.99	31.58	12.1	9.39	15.84	20.73	31.5786	71.84	76.84	66.37	66.09	54.42	37.79	44.89	0	0	0	1
PGAL8A_00398700	486	254.381	450	0.925926	0.0065	0.0817	0.001	4112	1891	4217	PF3D7_0317600	40S ribosomal protein S11, putative		796.87	1264.09	744.17	232.23	482.42	263.09	713.96	1264.09	98.68	98.32	97.28	95.36	96.24	92.37	97.94	1	1	1	0
PGAL8A_00398600	7113	50.238	3264	0.458878	0.0482	0.1451	0.0574	2562	1045	2955	PF3D7_0317700	CPSF (cleavage and polyadenylation specific factor), subunit A, putative		19.57	14.65	22.06	6.79	11.5	37.38	41.1	41.0984	69.36	66.59	57.99	55.36	59.04	61.47	61.1	0	0	0	1
PGAL8A_00398500	666	43.183	453	0.68018	0.0696	0.0384	0.2014	1820	2800	673	PF3D7_0317800	26S proteasome non-ATPase regulatory subunit 9, putative		12.47	21.4	56.44	6.94	12.16	14.87	14.45	56.4384	61.64	73.45	78.52	55.81	60.12	36.13	37.58	0	0	0	1
PGAL8A_00398400	1887	7.926	1422	0.753577	0.0294	0.0772	0.1245	3289	1985	1580	PF3D7_0317900	conserved Plasmodium protein, unknown function		4.94	3.91	8.15	1.14	1.65	3.89	0.68	8.1495	40.89	44.11	33.25	24.63	15.51	14.47	13.19	0	0	0	1
PGAL8A_00398200	1125	31.99	807	0.717333	0.0065	0.0334	0.0196	4112	2936	3944	PF3D7_0318100	stomatin-like protein		6.5	22.41	22.24	3.14	2.15	4.39	7.46	22.4129	48.39	74.24	58.11	40.63	19.04	15.44	27.24	0	0	0	1
PGAL8A_00398100	6603	137.846	5154	0.780554	0.0078	0.0123	0.0174	4058	3403	3982	PF3D7_0318200	DNA-directed RNA polymerase II subunit RPB1		127.86	110.32	163.86	67.8	28.6	10.4	39.85	163.856	92.8	91.12	91.02	88.7	74.66	26.85	60.29	1	0	0	0
PGAL8A_00398000	2685	26.878	1722	0.641341	0.129	0.0752	0.0513	693	2021	3113	PF3D7_0318300	conserved Plasmodium protein, unknown function		22.49	16.16	36.17	11.02	6.32	22.24	11.24	36.1736	71.94	68.31	69.34	64.47	45.33	47.91	33.44	0	0	0	1
PGAL8A_00397900	1788	23.745	771	0.431208	0.1745	0.6473	0.1655	320	61	1014	PF3D7_0318400	conserved Plasmodium protein, unknown function		2.64	0.36	1.58	0.17	4.46	18.12	114.23	114.231	19.14	9.59	13.69	11.79	36.13	41.79	81.62	0	0	1	0
PGAL8A_00397800	13092	29.327	5061	0.386572	0.1522	0.1419	0.1991	460	1076	690	PF3D7_0318500	conserved Plasmodium protein, unknown function		3.46	0.41	7.27	13.33	2.44	21.14	133.59	133.585	29.5	11.61	31.14	67.87	21.52	46.41	83.76	0	0	1	0
PGAL8A_00397700	2958	25.392	1845	0.623732	0.0313	0.039	0.0563	3220	2786	2978	PF3D7_0318600	cleavage and polyadenylation specificity factor, putative		24.13	20.87	12.42	6.06	2.63	10.25	2.75	24.1316	73.12	72.94	43.22	53.33	23.18	26.57	17.79	0	0	0	1
PGAL8A_00397500	1047	18.783	636	0.60745	0.0355	0.1277	0.2292	3050	1224	503	PF3D7_0318800	triosephosphate isomerase, putative		2.24	0.15	1.38	0.55	11.37	3.97	0	11.3656	13.64	3.92	12.86	17.74	58.75	14.72	6.4	0	0	0	1
PGAL8A_00397400	1194	106.454	621	0.520101	0.0482	0.0143	0.0537	2562	3360	3046	PF3D7_0318900	conserved protein, unknown function		16.89	23.85	38.5	11.77	4.24	25.06	32.78	38.5019	66.99	75.21	70.85	65.67	34.81	51.08	55.53	0	0	0	1
PGAL8A_00397300	4986	23.342	3882	0.77858	0.0303	0.014	0.038	3245	3366	3449	PF3D7_0319000	P-type ATPase, putative	ATP7	5.19	5.26	59.42	25.85	4.38	12.15	43.26	59.42	42.29	48.73	79.52	78.48	35.73	30.62	62.33	0	0	0	1
PGAL8A_00397200	324	12.844	264	0.814815	0.0204	0.001	0.0323	3639	3526	3613	PF3D7_0319100	E3 ubiquitin-protein ligase RBX1, putative		42.21	76.6	193.54	72.57	564.11	745.87	272.05	745.875	81.69	88.52	92.05	89.23	96.59	97.18	92.22	1	1	1	0
PGAL8A_00397100	2520	34.89	1449	0.575	0.0506	0.1589	0.1614	2460	925	1048	PF3D7_0319200	endonuclease/exonuclease/phosphatase family protein, putative		11.36	13.93	11.92	2.16	5.74	30.07	15.94	30.0678	59.79	65.64	41.99	34.27	42.55	56.1	39.45	0	0	0	1
PGAL8A_00397000	483	11.238	444	0.919255	0.0129	0.1525	0.0577	3896	978	2945	PF3D7_0319300	ubiquitin-conjugating enzyme E2, putative		24.21	20.03	22.32	1.83	74.45	142.5	52.14	142.495	73.19	72.27	58.32	31.52	86.57	86.29	66.19	0	1	0	0
PGAL8A_00396900	3501	64.138	1569	0.448158	0.0493	0.0636	0.0531	2511	2249	3064	PF3D7_0319400	kinesin-8, putative		3.9	0.47	29.28	8.04	6.72	28.31	27.35	29.2804	33.31	12.9	64.69	58.68	46.79	54.44	51.54	0	0	0	1
PGAL8A_00396800	1113	73.816	444	0.398922	0.0217	0.001	0.0477	3584	3526	3196	PF3D7_0319500	RNA-binding protein, putative		143.9	113.91	154.14	29.08	54.39	41.59	49.65	154.141	93.46	91.28	90.53	80.18	82.89	64.29	65.36	1	1	0	0
PGAL8A_00396700	498	179.902	318	0.638554	0.0467	0.001	0.0415	2627	3526	3352	PF3D7_0319600	elongation factor 1-delta, putative		136.75	85.69	70.58	8.74	56.74	45.48	68.32	136.746	93.15	89.42	82.1	60.41	83.54	66.35	72.21	1	1	0	0
PGAL8A_00396600	7824	10.223	3162	0.404141	0.1133	0.0509	0.0549	885	2533	3015	PF3D7_0319700	ABC transporter I family member 1, putative		32.41	50.46	8.03	1.66	2.62	20.73	44.64	50.4571	77.69	85.04	33.04	30.1	23.14	45.75	63.1	1	0	0	0
PGAL8A_00396400	840	11.594	606	0.721429	0.0725	0.0551	0.1034	1738	2434	1947	PF3D7_0319900	conserved Plasmodium protein, unknown function		21.32	7.89	24.82	9.02	27.93	154.07	75.51	154.073	71.01	55.76	60.65	61	74.24	87.17	74.12	0	1	0	0
PGAL8A_00396300	432	158.695	333	0.770833	0.0355	0.096	0.0383	3050	1638	3442	PF3D7_0320000	protein phosphatase inhibitor 2		10.8	20.6	188.8	55.4	588.28	652.93	279.83	652.93	58.84	72.77	91.93	87.09	96.71	96.9	92.6	1	1	1	0
PGAL8A_00396200	666	32.954	555	0.833333	0.0019	0.001	0.013	4215	3526	4054	PF3D7_0320100	protein transport protein SEC22	PfSec22	15.36	10.95	54	12.8	80.58	143.66	48.32	143.659	65.21	61.52	77.65	67.01	87.26	86.38	64.9	0	1	0	0
PGAL8A_00396100	1557	58.622	1140	0.732177	0.0342	0.1149	0.1582	3109	1384	1081	PF3D7_0320200	CPW-WPC family protein		2.2	0.36	1.55	0.34	2.89	84.05	336.21	336.207	13.15	9.8	13.48	14.67	25.45	78.21	94.13	0	0	1	0
PGAL8A_00396000	1608	199.479	1428	0.88806	0.0072	0.0072	0.0109	4084	3497	4092	PF3D7_0320300	T-complex protein 1 subunit epsilon	TRiCepsilon	96.66	141.77	110.03	22.48	16.21	14.95	54.82	141.767	90.64	92.56	87.55	76.61	65.86	36.26	67.37	1	0	0	0
PGAL8A_00395900	8484	0.645	5586	0.658416	0.236	0.255	0.1751	136	411	905	PF3D7_0320400	oocyst capsule protein Cap380, putative		2.06	0.31	1.53	0.03	0.31	1.28	1223.07	1223.07	11.41	8.12	13.42	10.32	6.44	9.47	99.03	0	0	1	0
PGAL8A_00395800	1221	31.897	663	0.542998	0.1086	0.1906	0.0855	965	688	2287	PF3D7_0320500	nicotinamidase, putative		12.54	43.83	56.9	31.9	11.42	119.48	52.06	119.48	61.73	83.26	78.68	81.37	58.89	83.94	66.09	1	1	0	0
PGAL8A_00395700	402	32.071	384	0.955224	0.0995	0.001	0.0711	1113	3526	2607	PF3D7_0320600	conserved Plasmodium protein, unknown function		2.35	2.98	20.42	9.58	45.75	277.21	14.03	277.205	15.29	39.52	55.98	62	80.66	92.7	37.04	0	1	0	0
PGAL8A_00395600	552	47.948	438	0.793478	0.0984	0.034	0.2786	1133	2914	305	PF3D7_0320700	signal peptidase complex subunit SPC2, putative	SPC25	4.25	13.66	151.78	75.65	104.27	353.64	145.1	353.64	36.25	65.33	90.5	89.48	89.35	94.32	85.01	1	1	1	0
PGAL8A_00395500	1296	50.045	1221	0.94213	0.0015	0.0098	0.0026	4219	3455	4205	PF3D7_0320800	ATP-dependent RNA helicase DDX6	PfDZ50	5.45	34.83	132.73	42.66	125.09	194.77	188.06	194.767	43.85	80.42	89.22	84.8	90.46	89.65	88.37	1	1	1	0
PGAL8A_00395400	474	1331.41	324	0.683544	0.001	0.001	0.001	4222	3526	4217	PF3D7_0320900	histone H2A.Z	PfH2A.Z	389.76	1084.97	5190.71	8195	3761.13	355.03	721.57	8195	97.11	98.17	99.46	99.67	99.19	94.36	97.99	1	1	1	0
PGAL8A_00395300	1338	31.777	570	0.426009	0.1309	0.3511	0.1383	666	226	1354	PF3D7_0321000	conserved Plasmodium protein, unknown function		19.76	25.79	22.26	4.97	10.71	41.75	232.72	232.716	69.57	76.29	58.18	49.16	57.45	64.38	90.51	0	0	1	0
PGAL8A_00395200	4518	13.456	1041	0.230412	0.1801	0.1991	0.2354	291	646	473	PF3D7_0321100	conserved Plasmodium protein, unknown function		2.77	0.39	8.86	10.35	2.5	6.53	41.71	41.7085	20.98	10.73	34.9	63.42	22.23	19.21	61.54	0	0	0	1
PGAL8A_00395100	1197	9.667	915	0.764411	0.0549	0.1804	0.0974	2311	756	2057	PF3D7_0321200	UDP-N-acetylglucosamine--dolichyl-phosphate N-acetylglucosaminephosphotransferase, putative		4.9	3.25	16.95	10.83	33.06	77.45	53.9	77.4519	40.52	41.06	51.34	64.22	76.8	76.91	66.96	0	0	0	1
PGAL8A_00395000	3330	11.632	573	0.172072	0.0607	0.7461	0.1988	2119	40	694	PF3D7_0321300	conserved Plasmodium protein, unknown function		2.31	0.46	4.85	4.49	2.84	35.84	6.61	35.8359	14.73	12.79	23.92	47.41	25.01	60.57	25.67	0	0	0	1
PGAL8A_00394900	945	17.489	693	0.733333	0.1293	0.0713	0.1414	688	2110	1302	PF3D7_0321400	protein kinase, putative		2.17	0.58	39.95	52.66	8.25	146.52	69.96	146.516	12.74	15.93	71.53	86.6	51.55	86.58	72.78	1	1	0	0
PGAL8A_00394800	2550	12.531	1899	0.744706	0.0457	0.0715	0.0516	2661	2100	3105	PF3D7_0321500	peptidase, putative		3.3	4.62	27.97	7.75	3.31	34.72	15.18	34.7168	27.7	46.86	63.58	58.11	28.58	59.72	38.51	0	0	0	1
PGAL8A_00394700	2043	126.81	1257	0.615272	0.0792	0.0976	0.084	1544	1615	2328	PF3D7_0321600	ATP-dependent RNA helicase DDX42, putative		8.18	19.82	35.63	23.43	8.47	26.52	38.65	38.6536	53.47	72.15	68.98	77.17	52.16	52.48	59.65	0	0	0	1
PGAL8A_00394600	5097	101.786	1575	0.309005	0.0802	0.0908	0.1133	1520	1733	1754	PF3D7_0321700	conserved Plasmodium protein, unknown function		3	1.22	11.38	7.15	2.32	7.53	11.02	11.3835	23.96	26.16	40.63	56.36	20.56	20.99	33.17	0	0	0	1
PGAL8A_00394500	6339	46.658	2808	0.442972	0.0474	0.1007	0.098	2592	1574	2044	PF3D7_0321800	WD repeat-containing protein, putative		41.24	31.47	26.08	24.32	4.5	14.9	19.81	41.2359	81.44	78.83	61.73	77.58	36.37	36.16	43.74	1	0	0	0
PGAL8A_00394400	3462	22.99	1524	0.440208	0.0614	0.0875	0.062	2083	1785	2829	PF3D7_0321900	cyclic amine resistance locus protein	Pfcarl	37.37	16.57	36.64	17.02	4.74	11.73	23.97	37.3705	79.92	68.82	69.72	71.85	37.74	29.72	48.39	0	0	0	1
PGAL8A_00394300	516	467.018	471	0.912791	0.0534	0.001	0.0308	2365	3526	3650	PF3D7_0322000	peptidyl-prolyl cis-trans isomerase	PfCYP19A	1245.17	1191.52	893.08	115.63	2446.42	303.58	197.94	2446.42	99.19	98.25	97.72	91.9	98.93	93.37	88.94	1	1	1	0
PGAL8A_00394200	1575	55.864	921	0.584762	0.0214	0.0309	0.0588	3597	2999	2922	PF3D7_0322100	mRNA-capping enzyme subunit beta // RNA triphosphatase		40.38	24.69	33.73	5.3	2.79	10.43	9.45	40.3798	81.18	75.77	67.82	50.36	24.64	26.92	30.42	1	0	0	0
PGAL8A_00394100	2304	91.308	990	0.429688	0.0553	0.434	0.2656	2302	145	345	PF3D7_0322200	conserved Plasmodium protein, unknown function		2.22	0.98	2.58	1.3	6.47	35.78	14.23	35.7834	13.29	23.13	17.54	26.69	45.94	60.52	37.27	0	0	0	1
PGAL8A_00394000	1641	7.401	1161	0.707495	0.0423	0.0531	0.0609	2778	2483	2858	PF3D7_0322300	diacylglycerol O-acyltransferase		9.74	8.85	76.38	28.16	11.88	46.94	9.98	76.377	57.14	57.54	83.3	79.73	59.65	67.13	31.51	1	0	0	0
PGAL8A_00393900	2286	8.341	1197	0.523622	0.1586	0.3075	0.1822	406	285	848	PF3D7_0322400	regulator of initiation factor 2 (eIF2)		19.92	15.59	14.06	1.58	4.69	39.2	16.12	39.199	69.78	67.7	46.39	29.44	37.37	62.59	39.73	0	0	0	1
PGAL8A_00393800	780	14.634	333	0.426923	0.1436	0.6477	0.1127	534	60	1768	PF3D7_0322500	iron-sulfur assembly protein, putative		2.58	2.02	10.02	4.84	7.51	50.82	16.12	50.8219	18.27	33.27	37.86	48.64	49.51	68.55	39.74	0	0	0	1
PGAL8A_00393700	3441	16.979	1245	0.361813	0.0472	0.0765	0.0528	2606	1999	3074	PF3D7_0322600	conserved Plasmodium protein, unknown function		2.84	0.53	0.94	0.36	0.95	5.97	13.49	13.4931	21.88	14.7	10.46	15.15	10.28	18.16	36.33	0	0	0	1
PGAL8A_00393600	8073	24.586	2691	0.333333	0.1324	0.1451	0.2165	652	1045	586	PF3D7_0322700	conserved Plasmodium protein, unknown function		7.99	14.81	16.32	4.14	4.96	14.69	6.17	16.3235	52.95	66.8	50.3	45.99	38.83	35.75	24.86	0	0	0	1
PGAL8A_00393500	513	14.353	312	0.608187	0.1273	0.2521	0.2301	719	420	498	PF3D7_0322800	conserved Plasmodium protein, unknown function		16.06	2.47	0.9	0	7.86	22.19	15.38	22.1924	65.97	36.73	10.31	5.14	50.56	47.81	38.79	0	0	0	1
PGAL8A_00393400	789	575.996	681	0.863118	0.0033	0.001	0.001	4185	3526	4217	PF3D7_0322900	40S ribosomal protein S3A, putative		376.41	905.57	551.84	182.9	128.23	42.88	111.72	905.566	96.97	97.8	96.61	94.25	90.67	65.21	81.34	1	1	1	0
PGAL8A_00393200	4155	28.088	1416	0.340794	0.0618	0.0564	0.0829	2065	2408	2348	PF3D7_0323100	conserved Plasmodium protein, unknown function		9.22	34.26	24.25	7.37	5.51	27.45	9.97	34.2583	56.03	80.08	60.19	57.24	41.51	53.63	31.45	1	0	0	0
PGAL8A_00393100	1116	11.363	486	0.435484	0.103	0.0299	0.0947	1059	3030	2103	PF3D7_0323200	conserved Plasmodium protein, unknown function		5.2	3.77	14.89	3.32	7.3	39.33	5.28	39.3303	42.32	43.6	48	41.7	48.94	62.68	23.33	0	0	0	1
PGAL8A_00393000	1233	7.937	669	0.542579	0.0912	0.198	0.2018	1267	655	668	PF3D7_0323300	conserved protein, unknown function		2.16	1.34	4.61	2.71	4.48	51.82	11.82	51.8187	12.55	27.47	23.37	38.13	36.21	68.95	34.2	0	0	0	1
PGAL8A_00392900	3051	17.68	2637	0.864307	0.1526	0.1398	0.171	455	1099	944	PF3D7_0323400	Rh5 interacting protein	PfRIPR	3.39	0.36	20.11	8.02	0.57	6.87	24.03	24.0268	28.63	9.9	55.57	58.66	8.17	19.82	48.47	0	0	0	1
PGAL8A_00392800	954	68.745	615	0.644654	0.0551	0.0336	0.0254	2307	2931	3799	PF3D7_0323500	survival motor neuron-like protein		19.27	13.38	32.12	10.23	5.57	37.22	56.08	56.0834	69.15	64.91	66.73	63.27	41.79	61.36	67.8	0	0	0	1
PGAL8A_00392700	1947	87.198	1326	0.681048	0.068	0.1431	0.0675	1865	1065	2683	PF3D7_0323600	conserved Plasmodium protein, unknown function		10.84	10.64	10.83	2.92	2.84	11.12	3.48	11.1238	58.89	60.9	39.5	39.38	25.03	28.35	19.76	0	0	0	1
PGAL8A_00392600	1854	81.512	693	0.373786	0.0276	0.1066	0.0748	3354	1493	2516	PF3D7_0323700	U4/U6.U5 tri-snRNP-associated protein 1, putative	SNU66	22.71	23.61	27	7.06	3.64	14.85	49.06	49.057	72.1	75.02	62.63	56.1	31.25	36.07	65.21	0	0	0	1
PGAL8A_00392500	2283	72.27	876	0.383706	0.0273	0.045	0.0424	3370	2648	3329	PF3D7_0323800	conserved Plasmodium protein, unknown function		22.34	14.86	20.08	6.61	16.72	245.41	23.84	245.415	71.72	66.96	55.51	54.86	66.45	91.69	48.17	0	1	0	0
PGAL8A_00053600	1710	48.183	1167	0.682456	0.0438	0.1544	0.1244	2715	962	1582	PF3D7_0403100	regulator of chromosome condensation, putative		7.71	1.48	9.97	2.03	3.16	14.64	26.78	26.7776	52.14	29.17	37.71	33.2	27.42	35.62	51.12	0	0	0	1
PGAL8A_00053700	1185	52.934	132	0.111392	0.0535	0.1293	0.0361	2362	1206	3502	PF3D7_0403200	pre-mRNA splicing factor, putative		61.47	52.48	25.96	6.99	11.5	19.58	116.39	116.387	86.48	85.37	61.51	55.93	59.01	44.18	81.93	1	0	1	0
PGAL8A_00053800	438	7.417	192	0.438356	0.3396	0.001	0.2254	40	3526	530	PF3D7_0403300	conserved Plasmodium protein, unknown function		7.96	2.25	5.2	1.28	38.81	133.26	15.24	133.262	52.86	34.98	25.05	26.44	78.75	85.37	38.62	0	1	0	0
PGAL8A_00053900	10041	19.005	4113	0.409621	0.0974	0.1773	0.2112	1155	778	614	PF3D7_0403400	conserved Plasmodium protein, unknown function		8.78	7.37	10.94	4.12	4.33	15.3	20.36	20.3567	54.96	54.53	39.76	45.92	35.38	36.99	44.37	0	0	0	1
PGAL8A_00054000	1146	13.255	834	0.727749	0.0493	0.0292	0.0562	2511	3052	2981	PF3D7_0403500	ubiquitin specific protease, putative		7.98	9.36	17.51	13.68	4.84	40.93	36.05	40.9342	52.93	58.68	52	68.44	38.24	63.75	57.86	0	0	0	1
PGAL8A_00054200	1719	72.436	603	0.350785	0.0288	0.2178	0.1015	3317	544	1985	PF3D7_0403600	conserved Plasmodium protein, unknown function		3.48	3.06	91.21	200.53	2.67	24.62	262.6	262.603	29.77	39.9	85.53	94.81	23.64	50.65	91.8	1	0	1	0
PGAL8A_00054300	2076	147.557	1551	0.74711	0.0174	0.0794	0.0299	3754	1945	3672	PF3D7_0403700	pre-mRNA-splicing factor CLF1, putative		47.89	59.29	52.4	19.32	10.89	12.78	87.78	87.7817	83.54	86.43	77.17	74.1	57.8	31.8	77.15	1	0	0	0
PGAL8A_00054400	2724	87.215	900	0.330396	0.0616	0.011	0.1074	2077	3427	1858	PF3D7_0403800	alpha/beta hydrolase, putative		16.24	6.04	40.64	23.33	5.29	98.48	151.02	151.018	66.17	51.17	72.01	77.12	40.56	80.87	85.65	0	1	1	0
PGAL8A_00054500	3495	27.023	1530	0.437768	0.0579	0.1817	0.073	2209	749	2575	PF3D7_0403900	SET domain protein, putative	PfSET8	2.37	0.24	12.66	9.9	3.83	17.34	247.53	247.53	15.67	6.13	43.74	62.89	32.51	40.64	91.12	0	0	1	0
PGAL8A_00054600	246	15.221	198	0.804878	0.0245	0.8631	0.0868	3491	31	2262	PF3D7_0404000	conserved Plasmodium protein, unknown function		8.35	2.11	11.25	10.78	36.66	138.62	573.64	573.645	53.85	33.89	40.44	64.18	77.94	85.98	97.18	0	1	1	0
PGAL8A_00054700	11664	14.231	1713	0.146862	0.1921	0.5603	0.4145	249	82	89	PF3D7_0404100	AP2 domain transcription factor AP2-SP2, putative	ApiAP2	2.19	0.19	0.88	0.65	1.06	6.71	5.75	6.7127	12.98	4.59	10.11	19.16	11.03	19.54	24.03	0	0	0	1
PGAL8A_00054800	483	8.078	342	0.708075	0.1605	0.1175	0.2374	394	1348	461	PF3D7_0404200	conserved Plasmodium protein, unknown function		1.27	0.48	1.67	1.19	35.76	100.09	182	182.001	4.85	13.31	14.16	25.44	77.6	81.11	88.18	0	1	1	0
PGAL8A_00054900	1776	83.333	429	0.241554	0.0703	0.3702	0.0528	1804	208	3074	PF3D7_0404300	conserved Plasmodium protein, unknown function		97.01	143.53	144.49	49.92	48.72	11.91	112.17	144.486	90.67	92.68	90.06	86.24	81.51	30.05	81.44	1	1	1	0
PGAL8A_00055000	942	1.311	798	0.847134	0.0833	0.0364	0.1334	1448	2853	1425	PF3D7_0404400	6-cysteine protein	PF36	18.59	3.2	7.72	4.64	13.7	61.56	38.05	61.5633	68.65	40.64	32.11	47.78	62.68	72.77	59.18	0	0	0	1
PGAL8A_00055100	1488	0.523	666	0.447581	0.0758	0.0953	0.1776	1638	1652	887	PF3D7_0404500	6-cysteine protein	P36p	5.23	4.63	5.84	1.64	2.07	4.86	3.89	5.8411	42.51	46.93	27.09	29.89	18.28	16.25	20.44	0	0	0	1
PGAL8A_00055300	10902	37.233	3687	0.338195	0.0922	0.1897	0.1647	1242	694	1021	PF3D7_0404600	conserved Plasmodium membrane protein, unknown function		21.11	17.59	23.95	1.96	4.19	39.02	7.1	39.0182	70.78	70	59.88	32.65	34.57	62.44	26.74	0	0	0	1
PGAL8A_00055400	2529	57.74	1062	0.419929	0.1072	0.0397	0.0543	986	2765	3034	PF3D7_0404700	dipeptidyl aminopeptidase 3	PfDPAP3	4.63	0.82	48.38	127.05	8.77	4.4	35.72	127.049	38.88	20.79	75.54	92.49	52.93	15.46	57.71	1	0	0	0
PGAL8A_00055500	1788	1.535	723	0.404362	0.3444	0.1515	0.1371	36	987	1362	PF3D7_0404800	conserved Plasmodium protein, unknown function		13.35	2.05	18.74	55.02	4.58	7.62	3.28	55.022	62.87	33.43	53.82	86.98	36.92	21.26	19.27	1	0	0	0
PGAL8A_00055600	1077	52.012	684	0.635097	0.2364	0.1707	0.0666	134	828	2713	PF3D7_0404900	6-cysteine protein	Pf41	13.4	3.42	124.12	311.23	8.03	9.89	41.84	311.23	62.94	41.87	88.78	96.47	50.89	25.91	61.62	1	0	0	0
PGAL8A_00055700	1578	9.656	1137	0.720532	0.0766	0.0873	0.0553	1608	1792	3010	PF3D7_0405000	ATP-dependent RNA helicase DDX51, putative		65.49	25.55	19.37	6.38	26.2	73.33	42.7	73.3283	86.98	76.16	54.53	54.21	73.24	75.66	62.06	1	0	0	0
PGAL8A_00055800	5880	62.311	2286	0.388776	0.0461	0.0916	0.0738	2646	1714	2548	PF3D7_0405100	protein transport protein Sec24B, putative		25.58	14.26	67.65	37.71	13.57	16.55	14.5	67.6519	74.14	66.12	81.56	83.24	62.45	39.29	37.68	1	0	0	0
PGAL8A_00055900	1365	12.684	972	0.712088	0.0255	0.0812	0.0655	3456	1899	2741	PF3D7_0405200	ag-1 blood stage membrane protein homologue	PfMAg-1	6.72	3.6	87.4	136.14	10.55	35.82	47.44	136.145	49.2	42.6	85.01	92.85	57.14	60.55	64.5	1	0	0	0
PGAL8A_00056000	3414	214.696	1074	0.314587	0.1442	0.1014	0.2233	524	1562	540	PF3D7_0405300	liver specific protein 2, putative // sequestrin // 6-cysteine protein		3.52	0.36	1.17	0.7	0.91	4	4.75	4.7468	30.17	9.85	11.65	19.77	10.07	14.82	22.45	0	0	0	1
PGAL8A_00056100	9513	219.716	6753	0.709871	0.0093	0.0104	0.0096	4025	3436	4115	PF3D7_0405400	pre-mRNA-processing-splicing factor 8, putative	PRP8	78.71	102.01	138.99	36.88	11.12	14.52	178.11	178.107	88.75	90.74	89.68	82.95	58.32	35.36	87.83	1	0	1	0
PGAL8A_00056200	666	13.465	477	0.716216	0.1295	0.1507	0.1362	687	994	1379	PF3D7_0405500	conserved Plasmodium protein, unknown function		9.74	8.93	8.53	1.31	45.94	111.3	12.44	111.298	57.16	57.71	34.17	26.8	80.73	82.78	35.1	0	1	0	0
PGAL8A_00056300	945	34.404	723	0.765079	0.0999	0.001	0.1278	1107	3526	1527	PF3D7_0405600	conserved Plasmodium membrane protein, unknown function		19.82	13.3	30.29	7.75	61.13	115.85	19.19	115.854	69.62	64.77	65.55	58.13	84.32	83.4	43.14	0	1	0	0
PGAL8A_00056400	5973	7.05	3198	0.535409	0.0386	0.0631	0.0624	2919	2264	2813	PF3D7_0405700	lysine decarboxylase, putative		4.16	8.08	8.78	1.26	3.26	14.81	45.75	45.7498	35.54	56.05	34.65	26.12	28.22	36.02	63.68	0	0	0	1
PGAL8A_00056500	315	43.028	246	0.780952	0.0665	0.1085	0.0294	1910	1468	3684	PF3D7_0405800	conserved Plasmodium protein, unknown function		5.07	0.77	15.71	1.9	81.86	325.32	620.33	620.328	41.67	19.93	49.26	32.03	87.38	93.79	97.39	0	1	1	0
PGAL8A_00056600	2028	488.465	852	0.420118	0.117	0.2912	0.1794	843	326	872	PF3D7_0405900	apical sushi protein	RON1	5.23	0.76	65.73	195.94	8.86	21.89	61.16	195.941	42.5	19.77	81.29	94.73	53.16	47.46	69.73	1	0	0	0
PGAL8A_00056700	1503	63.68	876	0.582834	0.0203	0.154	0.0831	3647	966	2344	PF3D7_0406000	conserved Plasmodium protein, unknown function		13.06	16.77	50.71	39.84	19.66	61.83	31.15	61.8313	62.37	69.1	76.46	83.95	69.22	72.86	54.38	1	0	0	0
PGAL8A_00056800	1485	200.661	1434	0.965657	0.0052	0.001	0.0058	4145	3526	4170	PF3D7_0406100	V-type proton ATPase subunit B		210.6	233.17	417	103.71	81.98	61.1	193.15	416.996	94.91	94.51	95.59	91.38	87.43	72.49	88.71	1	1	1	0
PGAL8A_00057000	792	92.123	747	0.943182	0.0435	0.059	0.0459	2731	2355	3239	PF3D7_0406400	cytosolic glyoxalase II		65.9	40.05	87.38	109.47	48.04	47.61	40.63	109.474	87.05	82.13	84.99	91.64	81.31	67.44	60.76	1	1	0	0
PGAL8A_00057100	8100	6.91	1206	0.148889	0.0485	0.1628	0.04	2545	891	3403	PF3D7_0406500	NYN domain-containing protein, putative		56.77	12.44	9.56	12.93	43.69	34.82	35.57	56.7656	85.65	63.48	36.78	67.21	80.13	59.75	57.56	1	1	0	0
PGAL8A_00057300	2523	30.964	1224	0.485137	0.1077	0.1804	0.1642	980	756	1025	PF3D7_0406700	conserved Plasmodium protein, unknown function		2.95	0.47	15.17	6.47	5.92	16.46	32.45	32.4484	23.42	12.95	48.43	54.41	43.34	39.02	55.25	0	0	0	1
PGAL8A_00057400	816	100.403	729	0.893382	0.0488	0.1286	0.0872	2531	1214	2254	PF3D7_0406800	ribosomal protein L25, putative		12.73	1.75	43.87	10.24	90.81	112.25	52	112.249	62	31.47	73.69	63.29	88.13	83.02	66.05	0	1	0	0
PGAL8A_00057500	9906	1.457	1506	0.152029	0.2561	0.7	0.4852	102	47	58	PF3D7_0406900	conserved Plasmodium protein, unknown function		7.03	1.4	0.99	0.28	2.24	15.7	260.07	260.075	50.25	28.11	10.73	13.67	19.91	37.53	91.67	0	0	1	0
PGAL8A_00057600	1314	14.799	576	0.438356	0.1553	0.6749	0.4508	432	53	68	PF3D7_0407000	conserved Plasmodium protein, unknown function		13.8	4.69	3.04	0.72	2.08	50.38	11.49	50.3784	63.32	47.07	18.92	20.05	18.4	68.43	33.79	0	0	0	1
PGAL8A_00057700	933	28.658	684	0.733119	0.1265	0.0964	0.0989	733	1632	2024	PF3D7_0407100	methyltransferase, putative		7.71	2.61	7.15	2.35	2.2	11.22	16.76	16.756	52.09	37.6	30.83	35.47	19.42	28.58	40.52	0	0	0	1
PGAL8A_00057800	555	35.463	381	0.686486	0.0547	0.5428	0.052	2321	87	3093	PF3D7_0407200	peptidyl-tRNA hydrolase 2, putative		78.02	107.67	51.68	12.38	74.09	216.32	778.11	778.115	88.66	90.95	76.86	66.54	86.45	90.58	98.18	1	1	1	0
PGAL8A_00057900	723	4.319	426	0.589212	0.061	0.096	0.0611	2104	1638	2852	PF3D7_0407300	transcription factor, putative		17.89	34.17	7.35	1.83	10.73	41.88	162.72	162.724	68.06	80.04	31.28	31.57	57.54	64.51	86.72	1	0	1	0
PGAL8A_00058100	1143	35.582	756	0.661417	0.0075	0.0377	0.0509	4072	2817	3119	PF3D7_0407500	mitochondrial carrier protein, putative		6.48	15.96	8.35	0.77	5.29	11.11	9.79	15.9553	48.28	68.11	33.69	20.58	40.57	28.28	31.16	0	0	0	1
PGAL8A_00058200	3240	1.042	867	0.267593	0.1359	0.217	0.4077	614	546	94	PF3D7_0407600	conserved Plasmodium protein, unknown function		3.01	0.48	0.47	0.24	1	12.12	8.07	12.1204	24.13	13.17	7.27	12.95	10.54	30.57	28.2	0	0	0	1
PGAL8A_00058300	5073	77.739	1923	0.379066	0.0745	0.1048	0.1675	1676	1518	984	PF3D7_0407700	conserved Plasmodium protein, unknown function		3.37	0.39	21.09	23.98	6.88	20.81	25.18	25.1786	28.47	10.8	56.85	77.38	47.29	45.8	49.58	0	0	0	1
PGAL8A_00058400	4068	104.886	1824	0.448378	0.1074	0.1394	0.1428	983	1104	1280	PF3D7_0407800	conserved Plasmodium protein, unknown function		2.73	0.57	55.13	53.11	7.25	37.49	107.97	107.973	20.5	15.72	78.07	86.71	48.8	61.55	80.79	1	0	1	0
PGAL8A_00058500	1803	14.324	1173	0.650582	0.0311	0.0231	0.0287	3226	3185	3696	PF3D7_0407900	AAA family ATPase, putative		7.76	5.9	18.77	6.6	2.69	10.3	32.12	32.1158	52.22	50.8	53.85	54.8	23.85	26.71	55.01	0	0	0	1
PGAL8A_00058600	513	5.122	402	0.783626	0.0859	0.2567	0.1637	1396	407	1026	PF3D7_0408000	conserved Plasmodium protein, unknown function		5.06	0.77	14.35	6.27	19.18	194.25	29.83	194.249	41.6	19.85	46.7	53.9	68.86	89.63	53.47	0	1	0	0
PGAL8A_00058700	3783	50.206	573	0.151467	0.1679	0.1149	0.3531	356	1384	144	PF3D7_0408100	conserved Plasmodium protein, unknown function		10.95	2.43	6.11	4.19	2.32	9.53	27.43	27.4339	59.08	36.39	27.9	46.31	20.6	25.2	51.63	0	0	0	1
PGAL8A_00058800	1416	20.577	327	0.230932	0.125	0.0373	0.2036	754	2831	657	PF3D7_0408200	conserved Plasmodium protein, unknown function		8.38	1.23	2.73	2.2	2.12	21.26	180.41	180.413	53.92	26.26	18.02	34.5	18.71	46.62	88.06	0	0	1	0
PGAL8A_00058900	801	61.792	333	0.41573	0.0106	0.001	0.0745	3974	3526	2526	PF3D7_0408300	zinc finger Ran-binding domain-containing protein 2, putative		30.16	50.26	37.29	12.78	16.36	16.02	78.41	78.4055	76.86	84.96	70.11	66.96	66.09	38.1	74.94	1	0	0	0
PGAL8A_00059000	1389	61.946	708	0.509719	0.1065	0.1219	0.1354	1003	1297	1395	PF3D7_0408400	conserved Plasmodium protein, unknown function		1.92	0.84	8.54	3.11	2.72	20.47	46.44	46.4401	9.81	21.2	34.19	40.52	24.11	45.32	63.94	0	0	0	1
PGAL8A_00059100	1683	100.525	927	0.550802	0.0215	0.0079	0.0173	3590	3487	3986	PF3D7_0408500	flap endonuclease 1	PfFEN1	5.02	1.81	81.72	66.24	18.9	8.21	60.98	81.7202	41.44	31.87	84.2	88.52	68.62	22.5	69.64	1	0	0	0
PGAL8A_00059200	2952	0.402	2616	0.886179	0.1287	0.1078	0.1027	697	1474	1959	PF3D7_0408600	sporozoite invasion-associated protein 1	S5	3.18	0.46	6.13	0.6	1.75	8.46	24.62	24.6209	26.05	12.71	27.96	18.45	16.12	23.06	49.11	0	0	0	1
PGAL8A_00059300	2577	0.943	1638	0.635623	0.0474	0.0425	0.0828	2592	2700	2352	PF3D7_0408700	perforin-like protein 1 // sporozoite micronemal protein essential for cell traversal	SPECT2	4.13	0.25	2.83	0.81	6.31	16.75	20.47	20.4697	35.23	6.27	18.37	21.16	45.28	39.76	44.63	0	0	0	1
PGAL8A_00059400	951	2.382	495	0.520505	0.14	0.001	0.1809	572	3526	859	PF3D7_0408800	conserved Plasmodium protein, unknown function		2.64	0.25	0.26	0	1.51	2.97	1369.62	1369.62	19.11	6.28	5.63	5.14	14.09	13.07	99.17	0	0	1	0
PGAL8A_00059600	5970	5.632	3072	0.514573	0.1481	0.1855	0.3015	493	723	236	PF3D7_0409000	conserved Plasmodium protein, unknown function		4.42	0.48	3.01	3.4	1.53	7.65	0.91	7.6502	37.55	13.33	18.82	41.99	14.22	21.36	13.62	0	0	0	1
PGAL8A_00059700	1512	190.871	945	0.625	0.0176	0.0309	0.022	3746	2999	3883	PF3D7_0409100	U4/U6 small nuclear ribonucleoprotein PRP31, putative	PRP31	53.01	48.91	52.66	11.54	14.46	23.07	114.2	114.197	84.8	84.61	77.29	65.24	63.7	48.94	81.6	1	0	1	0
PGAL8A_00059800	1395	61.296	1305	0.935484	0.018	0.0205	0.0418	3727	3248	3341	PF3D7_0409200	protein SOF1, putative		68.51	66.27	60.26	10.75	42.35	106.5	131.32	131.32	87.38	87.45	79.78	64.1	79.66	81.89	83.52	1	1	1	0
PGAL8A_00059900	2544	42.582	1740	0.683962	0.0719	0.1106	0.1182	1755	1439	1679	PF3D7_0409300	conserved Plasmodium protein, unknown function		15.73	15.87	8.63	1.26	1.56	6.04	8.76	15.8686	65.59	68.03	34.4	26.16	14.54	18.29	29.38	0	0	0	1
PGAL8A_00060000	1995	133.86	1134	0.568421	0.007	0.0038	0.0334	4093	3515	3583	PF3D7_0409400	chaperone protein DnaJ // heat shock protein 40	PfDnaJ	26.32	39.12	26.09	3.06	2.72	9.22	23.56	39.1153	74.47	81.88	61.76	40.21	24.18	24.51	47.84	1	0	0	0
PGAL8A_00060100	1209	11.36	624	0.516129	0.0864	0.001	0.0919	1382	3526	2159	PF3D7_0409500	conserved Plasmodium protein, unknown function		5.15	2.85	71.36	45.92	41.16	100.58	37.4	100.581	42.13	38.81	82.33	85.48	79.41	81.22	58.77	1	1	0	0
PGAL8A_00060200	2988	48.528	1815	0.60743	0.0385	0.0311	0.1084	2927	2995	1834	PF3D7_0409600	replication protein A1, large subunit	RPA1L	4.86	12.41	41	15.9	2.02	10.29	26.45	41.0018	40.22	63.41	72.22	70.9	17.95	26.64	50.72	0	0	0	1
PGAL8A_00060300	591	16.957	315	0.532995	0.1085	0.4414	0.2264	966	141	525	PF3D7_0409700	peptide chain release factor 2	RF2Cyt	3.39	9.35	21.52	15.57	81.58	307.71	45.44	307.712	28.61	58.66	57.45	70.43	87.35	93.47	63.45	0	1	0	0
PGAL8A_00060400	1626	88.834	927	0.570111	0.0419	0.1069	0.0811	2795	1483	2384	PF3D7_0409800	zinc finger protein, putative		57.51	41.39	34.81	25.85	8.59	52.4	83.4	83.3974	85.86	82.4	68.56	78.5	52.52	69.38	76.06	1	0	0	0
PGAL8A_00060500	1233	4.498	1056	0.856448	0.039	0.0913	0.2726	2900	1721	327	PF3D7_0409900	actin-like protein, putative		8.59	2.35	15.13	63.2	7.74	13.48	16.78	63.199	54.44	35.83	48.35	88.13	50.22	33.4	40.56	1	0	0	0
PGAL8A_00060600	1983	0.385	801	0.403933	0.4355	0.1594	0.3063	15	920	225	PF3D7_0410000	erythrocyte vesicle protein 1		24.78	60.28	50.65	25.61	4.66	10.77	72.7	72.6967	73.64	86.62	76.41	78.36	37.23	27.59	73.43	1	0	0	0
PGAL8A_00060900	3240	56.177	1266	0.390741	0.0602	0.0804	0.083	2130	1924	2347	PF3D7_0410300	protein phosphatase PPM1, putative		14.23	12.79	20.17	7.99	6.51	8.84	38.56	38.5648	63.94	64.1	55.69	58.63	46.08	23.89	59.55	0	0	0	1
PGAL8A_00061000	999	102.154	882	0.882883	0.0173	0.0408	0.0322	3756	2738	3620	PF3D7_0410400	exosome complex component RRP4, putative		35.51	18.48	11.89	4.91	58.5	112.09	55.03	112.092	79.14	70.78	41.92	48.94	83.83	82.97	67.44	0	1	0	0
PGAL8A_00061100	684	31.857	315	0.460526	0.218	0.1223	0.1507	170	1290	1164	PF3D7_0410500	conserved Plasmodium protein, unknown function		2.6	0.74	1.54	1.37	6.17	57.68	235.37	235.368	18.55	19.39	13.45	27.51	44.5	71.23	90.62	0	0	1	0
PGAL8A_00061200	981	31.121	888	0.905199	0.0163	0.001	0.0412	3789	3526	3361	PF3D7_0410600	conserved Plasmodium protein, unknown function		24.37	44.94	40.68	9.59	25	43.77	69.89	69.8853	73.24	83.5	72.04	62.06	72.49	65.67	72.74	1	0	0	0
PGAL8A_00061300	2286	29.085	1137	0.497375	0.0338	0.0648	0.0746	3134	2230	2519	PF3D7_0410700	ribosome biogenesis GTPase A, putative	YlqF	3.35	3.59	34.04	28.04	10.73	62.55	69.57	69.5701	28.2	42.53	68.11	79.64	57.52	73.12	72.56	0	0	0	1
PGAL8A_00061400	3381	94.388	888	0.262644	0.0456	0.14	0.0408	2665	1091	3376	PF3D7_0410800	conserved Plasmodium protein, unknown function		6.11	13.63	90.93	45.18	21.98	38.88	54.93	90.9275	46.84	65.29	85.49	85.34	70.64	62.32	67.39	1	0	0	0
PGAL8A_00061500	2487	51.27	1134	0.455971	0.0326	0.0717	0.1195	3181	2096	1660	PF3D7_0410900	conserved Plasmodium protein, unknown function		12.31	11.92	11.64	2.4	6.48	23.66	84.88	84.8826	61.47	62.84	41.35	35.94	46.01	49.65	76.37	0	0	0	1
PGAL8A_00061600	3477	23.484	669	0.192407	0.1213	0.2251	0.4101	796	521	93	PF3D7_0411000	conserved Plasmodium protein, unknown function		75.04	55.06	7.18	1	8.68	151.87	172.48	172.48	88.23	85.77	30.86	23.32	52.74	86.88	87.5	1	1	1	0
PGAL8A_00061700	597	42.679	438	0.733668	0.0599	0.067	0.1738	2143	2197	918	PF3D7_0411100	conserved Plasmodium protein, unknown function		16.55	2.44	7.72	0.95	6.05	57.1	20.38	57.0954	66.59	36.47	32.09	22.7	44	71.02	44.43	0	0	0	1
PGAL8A_00061800	2724	8.181	975	0.35793	0.1378	0.0698	0.3228	592	2138	190	PF3D7_0411200	conserved Plasmodium protein, unknown function		4.36	8.59	6.6	0.24	3.88	23.6	22.08	23.5988	37.16	57.05	29.31	12.86	32.96	49.59	46.32	0	0	0	1
PGAL8A_00061900	1971	8.437	660	0.334855	0.0934	0.1392	0.1669	1216	1108	996	PF3D7_0411300	conserved Plasmodium protein, unknown function		1.88	1.43	8.69	0.95	2.18	10.86	33.54	33.543	9.36	28.32	34.48	22.64	19.27	27.71	56.1	0	0	0	1
PGAL8A_00062000	3726	24.385	1551	0.416264	0.0722	0.1684	0.1697	1750	846	954	PF3D7_0411400	DEAD box ATP-dependent RNA helicase, putative		9.44	8.95	6.64	0.83	5.03	13.3	0	13.2963	56.59	57.76	29.38	21.29	39.31	32.99	6.4	0	0	0	1
PGAL8A_00062300	780	2.501	81	0.103846	0.1579	0.001	0.1664	410	3526	1000	PF3D7_0411700	conserved Plasmodium protein, unknown function		2.25	0.38	0	0.7	69.36	1833.2	40.26	1833.2	13.88	10.54	1.45	19.85	85.84	98.7	60.52	0	1	0	0
PGAL8A_00062400	5232	54.61	882	0.168578	0.1958	0.1397	0.2513	234	1101	402	PF3D7_0411800	conserved Plasmodium protein, unknown function		1.98	0.66	7.82	3.56	3.1	18.81	12.57	18.8111	10.56	17.64	32.4	42.88	27.04	43.12	35.28	0	0	0	1
PGAL8A_00062600	4700	74.499	2826	0.601277	0.0335	0.0495	0.0287	3151	2563	3696	PF3D7_0411900	DNA polymerase alpha catalytic subunit A		3.35	4.7	78.96	38.36	11.94	42.19	23.16	78.9642	28.24	47.12	83.75	83.38	59.7	64.76	47.41	1	0	0	0
PGAL8A_00062700	1530	61.965	837	0.547059	0.0435	0.0142	0.0622	2731	3362	2823	PF3D7_0412000	LITAF-like zinc finger protein, putative		2.37	8.52	64.16	25.66	12.42	9.5	10.78	64.1565	15.53	56.9	80.84	78.4	60.48	25.1	32.7	1	0	0	0
PGAL8A_00062800	936	48.216	648	0.692308	0.0259	0.1312	0.0849	3439	1183	2300	PF3D7_0412100	30S ribosomal protein S12, mitochondrial, putative		5.68	2.59	11.88	2.03	2.61	5.75	11.07	11.8837	44.82	37.46	41.91	33.24	23.07	17.78	33.26	0	0	0	1
PGAL8A_00062900	975	8.657	675	0.692308	0.0254	0.0323	0.0842	3461	2957	2321	PF3D7_0412200	conserved Plasmodium protein, unknown function		3.66	3.02	2.8	0.88	8.15	30.37	0	30.3715	31.49	39.74	18.24	22	51.24	56.4	6.4	0	0	0	1
PGAL8A_00086900	891	269.782	651	0.73064	0.0643	0.0257	0.0695	1984	3120	2635	PF3D7_0413500	phosphoglucomutase-2	PfPGM2	5.05	0.8	88.22	47	16.35	29.8	18.91	88.2217	41.58	20.56	85.08	85.7	65.99	55.77	42.82	1	0	0	0
PGAL8A_00087000	1179	137.76	1086	0.92112	0.0061	0.0128	0.0051	4123	3394	4181	PF3D7_0413600	26S protease regulatory subunit 6B, putative // 26S proteasome AAA-ATPase subunit RPT3, putative		54.36	61.74	333.63	206.91	43.56	35.27	198.18	333.63	85.15	86.74	94.62	94.95	80.08	60.05	88.97	1	1	1	0
PGAL8A_00087100	1005	18.222	780	0.776119	0.0559	0.034	0.1103	2283	2914	1802	PF3D7_0413700	lysine decarboxylase-like protein, putative		4.41	6.08	61.41	22.25	8	29.93	28.89	61.4147	37.51	51.26	80.08	76.44	50.81	55.91	52.69	1	0	0	0
PGAL8A_00087200	822	50.902	498	0.605839	0.0344	0.001	0.0574	3102	3526	2955	PF3D7_0413800	50S ribosomal protein L10, putative		2.11	0.47	12.1	5.58	16.18	189.27	9.96	189.274	11.87	12.99	42.48	51.55	65.83	89.3	31.44	0	1	0	0
PGAL8A_00087300	2544	57.115	1554	0.610849	0.0484	0.0256	0.05	2550	3123	3139	PF3D7_0413900	ubiquitin carboxyl-terminal hydrolase 13, putative		26.73	12.78	37	14	8.41	17.48	38.77	38.7738	74.74	64.06	69.92	68.92	51.96	40.83	59.72	0	0	0	1
PGAL8A_00087400	3582	124.986	2748	0.767169	0.0569	0.0351	0.0413	2251	2880	3360	PF3D7_0414000	structural maintenance of chromosomes protein 3, putative		2.54	7.7	26.01	6.07	8.9	41.57	46.87	46.8721	17.74	55.34	61.57	53.38	53.33	64.27	64.19	0	0	0	1
PGAL8A_00087500	4332	10.361	2541	0.586565	0.1948	0.2595	0.3655	237	401	127	PF3D7_0414100	conserved Plasmodium membrane protein, unknown function		1.19	3.41	3.49	0.79	1.63	5.83	1.26	5.8275	4.41	41.82	20.22	20.88	15.19	17.95	14.35	0	0	0	1
PGAL8A_00087700	333	15.568	213	0.63964	0.2418	0	0.0432	126	4212	3312	PF3D7_0414300	Rab5-interacting protein, putative		19.71	20.35	33.26	6.07	19.46	65.77	4.13	65.7683	69.5	72.6	67.39	53.36	68.99	73.88	21	0	0	0	1
PGAL8A_00087800	1041	6.468	291	0.279539	0.2304	1.0442	0.2882	147	15	276	PF3D7_0414400	conserved Plasmodium protein, unknown function		1.05	0.72	0.25	0	0.44	4	0	4.0024	3.74	19.01	5.48	5.14	7.34	14.83	6.4	0	0	0	1
PGAL8A_00087900	1083	50.286	642	0.592798	0.0339	0.0308	0.1379	3128	3005	1358	PF3D7_0414500	RNA-binding protein, putative		5.83	1.45	4.45	3.23	64.15	33.56	38.44	64.1494	45.49	28.77	22.85	41.25	84.79	58.95	59.44	0	1	0	0
PGAL8A_00088000	717	23.336	429	0.598326	0.0305	0.001	0.0106	3240	3526	4097	PF3D7_0414600	acylated pleckstrin-homology domain-containing protein, putative		3.1	2.8	76.71	61.85	30.91	93.92	262.83	262.832	25.12	38.62	83.37	87.93	75.84	79.99	91.83	1	0	1	0
PGAL8A_00088100	1788	25.865	1215	0.67953	0.0679	0.0391	0.0808	1866	2781	2389	PF3D7_0414700	GTP-binding protein, putative		3.47	4.73	21.7	13.33	3.83	17.74	21.4	21.7011	29.55	47.2	57.57	67.86	32.47	41.2	45.63	0	0	0	1
PGAL8A_00088200	1035	1.079	153	0.147826	0.1054	0.7744	0.4021	1017	37	102	PF3D7_0414800	conserved Plasmodium protein, unknown function		1.04	0.4	6.17	9.8	0.18	2.1	23.32	23.3188	3.72	11.03	28.09	62.55	5.11	11.46	47.57	0	0	0	1
PGAL8A_00088300	828	88.593	822	0.992754	0.0207	0.3446	0.0651	3627	237	2749	PF3D7_0414900	armadillo-domain containing rhoptry protein // armadillo repeats-only protein	PfARO	16.01	2.97	175.02	475.3	13.95	5.39	74.35	475.298	65.88	39.47	91.47	97.49	62.94	17.29	73.88	1	0	0	0
PGAL8A_00088400	1131	133.66	957	0.846154	0.0213	0.001	0.0202	3602	3526	3930	PF3D7_0415000	arsenical pump-driving ATPase, putative		51.83	12.87	38.26	5.67	18.52	33.16	2.45	51.8278	84.49	64.17	70.69	51.94	68.25	58.67	16.99	1	0	0	0
PGAL8A_00088500	1026	11.018	708	0.690058	0.0874	0.0523	0.1829	1353	2500	843	PF3D7_0415100	conserved protein, unknown function		30.59	3.26	7.42	0.71	7.61	59.55	2.25	59.5513	76.98	41.08	31.47	19.92	49.87	71.99	16.67	0	0	0	1
PGAL8A_00088600	4374	17.021	1587	0.362826	0.0761	0.0837	0.1518	1626	1857	1149	PF3D7_0415200	conserved Plasmodium protein, unknown function		3.95	2.54	14.55	4.91	1.59	7.59	8.85	14.5518	33.74	37.16	47.15	48.95	14.83	21.17	29.51	0	0	0	1
PGAL8A_00088700	4308	64.582	1440	0.334262	0.0479	0.0628	0.169	2573	2273	961	PF3D7_0415300	cdc2-related protein kinase 3	PfCRK3	55.7	74.38	40.24	8.48	12.83	30.14	35.5	74.3797	85.53	88.3	71.78	59.67	61.29	56.19	57.5	1	0	0	0
PGAL8A_00088800	627	22.934	537	0.856459	0.0514	0.0288	0.0539	2426	3065	3042	PF3D7_0415400	coatomer subunit zeta, putative		35.46	20.11	55.25	35.16	117.86	296.53	69.18	296.531	79.09	72.39	78.1	82.55	90.22	93.2	72.39	1	1	0	0
PGAL8A_00088900	687	77.497	447	0.650655	0.0287	0.001	0.0174	3320	3526	3982	PF3D7_0415500	nuclear cap-binding protein subunit 2, putative		49.01	42.85	46.69	18.34	57.87	77.14	57.55	77.1369	83.82	82.97	74.71	73.22	83.73	76.82	68.3	1	1	0	0
PGAL8A_00089000	669	64.166	612	0.914798	0.0299	0.0243	0.1957	3257	3158	720	PF3D7_0415600	GTP:AMP phosphotransferase	PfGAK	3.63	1.72	2.62	0.43	8.93	68.98	48.67	68.9796	31.12	31.24	17.66	16.05	53.44	74.62	65.05	0	0	0	1
PGAL8A_00089100	1233	11.784	786	0.63747	0.0981	0.1429	0.2568	1138	1068	379	PF3D7_0415700	conserved Plasmodium protein, unknown function		2.03	1.09	11.87	5.73	1.43	6.08	4.04	11.8745	11.03	24.56	41.89	52.19	13.61	18.35	20.75	0	0	0	1
PGAL8A_00089300	618	335.114	510	0.825243	0.0055	0.001	0.0051	4136	3526	4181	PF3D7_0415900	60S ribosomal protein L15, putative		2079.49	3005.1	1316.52	456.56	2032.85	620.83	1007.47	3005.1	99.53	99.36	98.42	97.37	98.67	96.68	98.65	1	1	1	0
PGAL8A_00089400	1416	56.049	519	0.366525	0.0402	0.1643	0.1066	2861	877	1869	PF3D7_0416000	RNA-binding protein, putative		34.14	66.26	197.78	323.13	167.67	109.97	99.71	323.133	78.55	87.43	92.14	96.66	92.47	82.59	79.36	1	1	0	0
PGAL8A_00089600	1926	9.517	1161	0.602804	0.0756	0.1285	0.1525	1644	1218	1144	PF3D7_0416100	glutamyl-tRNA(Gln) amidotransferase subunit A		6.23	18.86	70.52	59.35	8.73	36.92	54.14	70.516	47.26	71.16	82.07	87.61	52.8	61.23	67.06	1	0	0	0
PGAL8A_00089700	621	42.486	180	0.289855	0.0724	0	0.0638	1742	4212	2785	PF3D7_0416200	conserved protein, unknown function		37.31	34.44	39.96	15.07	29.25	34.95	502.25	502.253	79.9	80.16	71.54	70.1	75.04	59.89	96.65	1	0	1	0
PGAL8A_00089800	3315	9.017	2022	0.609955	0.0686	0.0833	0.0786	1847	1867	2440	PF3D7_0416300	DNA helicase MCM9, putative		3.85	5.48	26.08	8.82	2.38	9.94	319.4	319.402	32.91	49.61	61.74	60.6	21.12	25.97	93.75	0	0	1	0
PGAL8A_00089900	3096	86.351	1551	0.500969	0.0448	0.0843	0.0689	2692	1846	2650	PF3D7_0416400	histone acetyltransferase, putative		14.28	39.14	151.06	71.61	17.89	28.49	355.34	355.336	64.03	81.93	90.46	89.08	67.66	54.6	94.46	1	0	1	0
PGAL8A_00090000	657	9.004	420	0.639269	0.0102	0.001	0.0019	3990	3526	4210	PF3D7_0416500	repressor of RNA polymerase III transcription MAF1		2.77	0.81	24.76	19.09	30.55	80.61	86.1	86.1005	20.91	20.75	60.55	73.84	75.7	77.55	76.72	0	0	0	1
PGAL8A_00090100	885	39.83	480	0.542373	0.1096	0.0803	0.1448	936	1928	1256	PF3D7_0416600	prohibitin-like protein, putative		3.62	0.73	14.95	4.08	19.47	63.39	3.24	63.3903	31.08	19.27	48.12	45.7	69.02	73.39	19.08	0	0	0	1
PGAL8A_00090300	579	121.516	525	0.906736	0.008	0.001	0.0073	4053	3526	4147	PF3D7_0416800	small GTP-binding protein sar1		215.09	403.58	794.91	680.72	357.45	241.42	415.63	794.91	94.95	95.98	97.39	98.08	95.29	91.48	95.62	1	1	1	0
PGAL8A_00090400	6588	24.73	2616	0.397086	0.0572	0.0714	0.133	2241	2106	1432	PF3D7_0416900	conserved Plasmodium protein, unknown function		15.58	18.88	9.72	3.48	2.95	21.79	40.23	40.2282	65.5	71.2	37.13	42.46	25.95	47.29	60.48	0	0	0	1
PGAL8A_00090500	1800	25.981	333	0.185	0.2711	2.5961	0.2563	82	1	382	PF3D7_0417000	conserved Plasmodium protein, unknown function		3.66	2.2	1.89	0.35	46.09	153.37	245.02	245.017	31.47	34.65	14.94	15.11	80.8	87.09	91	0	1	1	0
PGAL8A_00090600	1302	2.06	885	0.679724	0.0209	0.0397	0.0673	3616	2765	2691	PF3D7_0417100	mRNA-binding protein PUF2	PfPuf2	1.76	0.21	0.11	0	3.77	23.59	35.32	35.3179	8.17	4.92	3.67	5.14	32.04	49.58	57.37	0	0	0	1
PGAL8A_00090700	1770	72.567	1359	0.767797	0.0896	0.1062	0.06	1302	1498	2886	PF3D7_0417200	bifunctional dihydrofolate reductase-thymidylate synthase	PfDHFR-TS	4.06	4.38	60.49	16.89	10.47	11.94	179.97	179.965	34.64	45.94	79.89	71.63	57.01	30.17	88.02	0	0	1	0
PGAL8A_00090800	2190	56.207	1101	0.50274	0.0497	0.0518	0.0448	2490	2515	3269	PF3D7_0417300	LETM1-like protein, putative		34.62	46.61	37.1	7.81	12.51	23.1	68.53	68.5337	78.81	83.88	70.02	58.28	60.65	48.97	72.29	1	0	0	0
PGAL8A_00090900	14505	32.55	4425	0.305067	0.1265	0.1478	0.1734	733	1021	923	PF3D7_0417400	conserved Plasmodium protein, unknown function		45.03	50.68	22.29	9.87	8.48	40.96	13.43	50.6822	82.76	85.1	58.27	62.82	52.21	63.77	36.25	1	0	0	0
PGAL8A_00091100	2928	5.26	669	0.228484	0.0438	0.1215	0.066	2715	1305	2733	PF3D7_0417600	conserved Plasmodium protein, unknown function		2.5	0.26	5.64	0.97	3.77	23.07	34.63	34.632	17.14	6.55	26.28	22.94	31.97	48.95	56.92	0	0	0	1
PGAL8A_00091200	1584	2.528	438	0.276515	0.1702	0.4514	0.2894	341	133	273	PF3D7_0417700	conserved Plasmodium protein, unknown function		1.96	0.26	6.51	1.91	10.34	52.68	34.48	52.6802	10.25	6.42	29.1	32.09	56.71	69.52	56.78	0	0	0	1
PGAL8A_00091300	2532	34.424	1029	0.406398	0.0293	0.1139	0.0805	3299	1400	2397	PF3D7_0417800	cdc2-related protein kinase 1	Pfcrk-1	6.11	11.59	40.13	7.84	16.34	23.54	44.64	44.639	46.86	62.4	71.68	58.33	65.97	49.46	63.08	0	0	0	1
PGAL8A_00091400	2271	13.024	801	0.352708	0.0526	0.0605	0.0866	2382	2322	2267	PF3D7_0417900	conserved Plasmodium protein, unknown function		3	1.19	0.98	0.39	4.47	30.04	12.99	30.0409	23.93	25.88	10.7	15.54	36.2	56.07	35.76	0	0	0	1
PGAL8A_00091500	12660	23.065	5829	0.460427	0.1235	0.2705	0.1712	775	377	942	PF3D7_0418000	conserved Plasmodium protein, unknown function		3.15	0.88	6.9	4.47	5.04	29.79	31.75	31.7464	25.77	21.69	30.21	47.29	39.4	55.74	54.84	0	0	0	1
PGAL8A_00091600	3450	22.788	1473	0.426957	0.0074	0.0161	0.0428	4078	3332	3319	PF3D7_0418100	protein SOC1, putative		34.97	17.17	10.96	1.13	4.13	16.74	19.18	34.9677	78.93	69.59	39.83	24.52	34.24	39.73	43.12	0	0	0	1
PGAL8A_00091700	1290	201.381	1125	0.872093	0.0225	0.0404	0.0218	3557	2748	3889	PF3D7_0418200	eukaryotic translation initiation factor 3 subunit M, putative		76.07	70.07	76.8	20.05	27.28	42.61	28.2	76.8048	88.37	87.81	83.4	74.69	73.91	65.02	52.21	1	0	0	0
PGAL8A_00091900	333	8.41	228	0.684685	0.2703	1.4857	0.0927	83	7	2139	PF3D7_0418400	conserved Plasmodium protein, unknown function		6.96	22.11	8.98	0.89	15	118.67	80.56	118.674	50.03	74.05	35.23	22.1	64.5	83.82	75.39	0	1	0	0
PGAL8A_00092000	564	72.067	486	0.861702	0.0268	0.001	0.0064	3397	3526	4164	PF3D7_0418500	trafficking protein particle complex subunit 3, putative		14.81	22.21	44.79	9.38	50.11	254.89	69.46	254.889	64.62	74.12	74.03	61.69	81.88	92.07	72.52	0	1	0	0
PGAL8A_00092100	4065	4.681	1533	0.377122	0.0868	0.0549	0.0511	1373	2439	3115	PF3D7_0418600	regulator of chromosome condensation, putative		3.93	1.25	16.66	18.84	0.97	2.91	27.82	27.8157	33.6	26.47	50.84	73.53	10.39	12.95	51.83	0	0	0	1
PGAL8A_00092200	1698	31.887	735	0.432862	0.0306	0.0458	0.0729	3236	2628	2577	PF3D7_0418700	RNA-binding protein NOB1, putative		43.71	31.44	14.53	5.5	4.44	19.73	81.82	81.8206	82.34	78.8	47.08	51.24	36.02	44.33	75.68	1	0	0	0
PGAL8A_00092300	804	13.424	645	0.802239	0.0507	0.1658	0.1139	2458	868	1744	PF3D7_0418800	MOLO1 domain-containing protein, putative		3.98	0.4	0.63	0	317.04	3290.05	610.56	3290.05	34.1	11.16	8.22	5.14	94.91	99.19	97.32	0	1	1	0
PGAL8A_00092400	1128	9.394	735	0.651596	0.095	0.1714	0.0823	1187	822	2367	PF3D7_0418900	conserved Plasmodium protein, unknown function		3.16	1	9.26	1.48	8.86	21.08	104.55	104.553	25.84	23.4	35.94	28.46	53.19	46.25	80.01	0	0	1	0
PGAL8A_00092500	1332	8.457	600	0.45045	0.1406	0.0907	0.0652	564	1735	2747	PF3D7_0419000	conserved Plasmodium protein, unknown function		1.66	0.24	7.22	1.33	28.43	46.6	78.26	78.2584	7.28	5.97	30.98	27.03	74.52	66.92	74.85	0	0	0	1
PGAL8A_00092600	747	8.509	504	0.674699	0.194	0.4438	0.2589	240	139	369	PF3D7_0419100	conserved Plasmodium protein, unknown function		2	2.28	4.44	0.7	10.68	15.81	6.71	15.8074	10.73	35.33	22.81	19.85	57.4	37.75	25.91	0	0	0	1
PGAL8A_00092700	411	14.393	237	0.576642	0.0417	0	0.0432	2801	4212	3312	PF3D7_0419200	protein transport protein GOT1, putative		9.91	5.4	19.22	11.44	46.02	102.83	20.43	102.833	57.49	49.35	54.42	65.12	80.77	81.5	44.52	0	1	0	0
PGAL8A_00092800	969	18.712	441	0.455108	0.014	0.0815	0.1957	3866	1894	720	PF3D7_0419300	conserved Plasmodium protein, unknown function		3.21	0.69	33.83	17.5	8.87	13.87	17.47	33.8333	26.51	18.4	67.89	72.51	53.21	34.24	41.39	0	0	0	1
PGAL8A_00092900	6189	12.834	3102	0.501212	0.1726	0.2179	0.1559	330	542	1111	PF3D7_0419400	conserved Plasmodium protein, unknown function		2.19	0.34	20.03	19.17	1.2	4.34	14.14	20.0319	13.07	9.11	55.44	73.95	12	15.41	37.2	0	0	0	1
PGAL8A_00093000	1374	7.649	543	0.395197	0.0681	0.0841	0.1747	1862	1850	909	PF3D7_0419500	conserved Plasmodium membrane protein, unknown function		10.11	3.79	12.62	6.2	6.42	34.06	8.68	34.0572	57.82	43.71	43.66	53.78	45.7	59.3	29.25	0	0	0	1
PGAL8A_00093100	873	653.79	450	0.515464	0.0127	0.001	0.0052	3904	3526	4180	PF3D7_0419600	ran-specific GTPase-activating protein 1, putative		444.55	219.53	443.28	137.37	133.45	107.29	819.9	819.896	97.52	94.27	95.78	92.92	90.91	82.08	98.36	1	1	1	0
PGAL8A_00093200	855	141.541	219	0.25614	0.0706	0.1276	0.0951	1800	1226	2099	PF3D7_0419700	apical merozoite protein	PV2	13.13	0.97	29.28	38.47	8.43	57.19	18.6	57.1907	62.51	23.03	64.7	83.43	52.03	71.06	42.58	1	0	0	0
PGAL8A_00093300	666	18.851	417	0.626126	0.0094	0.0694	0.1175	4022	2147	1691	PF3D7_0419800	60S ribosomal protein L7ae/L30e, putative		155.92	42.6	36.57	22.74	47.79	289.72	41.32	289.719	93.72	82.86	69.67	76.72	81.2	93.08	61.36	1	1	0	0
PGAL8A_00093400	13173	38.09	3765	0.285812	0.1184	0.1923	0.1017	829	676	1982	PF3D7_0419900	phosphatidylinositol 4-kinase, putative		34.29	22.52	25.24	16.01	4.22	24.97	16.11	34.2916	78.62	74.4	60.93	71.01	34.74	51.01	39.71	0	0	0	1
PGAL8A_00093500	9825	96.423	1536	0.156336	0.0834	0.2321	0.2381	1445	492	455	PF3D7_0420000	zinc finger protein, putative		34.31	39.23	17.74	4.59	3.7	20.55	45.52	45.5171	78.64	81.95	52.33	47.64	31.57	45.46	63.55	1	0	0	0
PGAL8A_00093600	2163	96.18	978	0.45215	0.015	0.1125	0.0533	3835	1417	3057	PF3D7_0420100	serine/threonine protein kinase RIO2	PfRIO2	59.19	81.38	43.78	20.87	28.09	29.09	84.94	84.9416	86.15	88.97	73.55	75.35	74.36	55.22	76.41	1	0	0	0
PGAL8A_00093800	1566	39.588	801	0.511494	0.0753	0.0455	0.1609	1653	2637	1055	PF3D7_0420200	holo-[acyl-carrier-protein] synthase, putative		5.97	1.24	6.18	0	2.16	39.92	45.46	45.462	46.13	26.41	28.13	5.14	19.12	63.1	63.49	0	0	0	1
PGAL8A_00093900	7902	138.721	2970	0.375854	0.0889	0.0737	0.0887	1313	2048	2222	PF3D7_0420300	AP2 domain transcription factor, putative		64.05	101.08	88.46	69.06	8.36	17.53	360.19	360.188	86.86	90.62	85.11	88.84	51.83	40.96	94.55	1	0	1	0
PGAL8A_00094000	783	26.312	417	0.532567	0.07	0.1764	0.1194	1809	787	1661	PF3D7_0420400	ribosome-recycling factor		3.39	3.27	5.86	3.67	19.08	53.73	29.69	53.7327	28.58	41.13	27.14	43.64	68.76	69.98	53.38	0	0	0	1
PGAL8A_00449500	594	2.119	399	0.671717	0.0789	0.001	0.1312	1551	3526	1464	PF3D7_0420500	conserved Plasmodium protein, unknown function		2.1	0.13	6.48	4.92	99.84	406.74	0	406.745	11.81	3.7	29.03	49.01	88.89	95.14	6.4	0	1	0	0
PGAL8A_00449400	1314	104.76	492	0.374429	0.0265	0.0232	0.0869	3410	3184	2261	PF3D7_0420600	conserved Plasmodium protein, unknown function		3.22	3.25	29.92	27.05	13.08	60.49	0	60.4902	26.73	40.99	65.22	79.07	61.73	72.34	6.4	0	0	0	1
PGAL8A_00449300	5844	6.51	2136	0.365503	0.3158	0.1865	0.3296	53	711	179	PF3D7_0421700	conserved Plasmodium protein, unknown function		1.98	0.12	0.07	0.2	2.5	21.19	22.63	22.6326	10.5	3.53	3.05	12.27	22.17	46.44	46.94	0	0	0	1
PGAL8A_00192000	213	2.622	75	0.352113	0.019	0.155	0.0421	3690	957	3334	PF3D7_0421900	conserved Plasmodium protein, unknown function		1.93	0.37	0.76	0	95.21	1977.78	336.83	1977.78	9.96	9.99	9.19	5.14	88.47	98.82	94.16	0	1	1	0
PGAL8A_00192100	954	56.566	735	0.77044	0.0708	0.5254	0.1329	1794	94	1435	PF3D7_0422000	steroid dehydrogenase, putative		4.54	4.6	15.16	1.22	48.38	186.25	66.63	186.247	38.42	46.72	48.4	25.65	81.44	89.13	71.55	0	1	0	0
PGAL8A_00192200	1041	45.718	564	0.541787	0.018	0.001	0.0596	3727	3526	2896	PF3D7_0422100	transmembrane emp24 domain-containing protein, putative		27.58	15.2	28.99	10.15	8.83	58.01	44.7	58.0113	75.39	67.28	64.45	63.18	53.09	71.37	63.13	0	0	0	1
PGAL8A_00192300	13701	66.328	2235	0.163127	0.0725	0.1588	0.1671	1738	926	988	PF3D7_0422200	erythrocyte membrane-associated antigen		15.32	15.34	10.05	4.55	5.5	45.83	22.76	45.83	65.15	67.41	37.93	47.55	41.44	66.52	47.1	0	0	0	1
PGAL8A_00192600	519	965.983	507	0.976879	0.0164	0.001	0.0187	3786	3526	3959	PF3D7_0422400	40S ribosomal protein S19		439.33	609.6	463.27	66.46	394.22	352.79	346.37	609.598	97.42	96.81	95.98	88.59	95.57	94.29	94.25	1	1	1	0
PGAL8A_00192700	7878	95.157	4986	0.632902	0.0254	0.0376	0.027	3461	2820	3748	PF3D7_0422500	pre-mRNA-splicing helicase BRR2, putative		51.17	70.93	37.09	9.61	13.52	16.49	58.4	70.9344	84.4	87.92	70	62.09	62.26	39.1	68.67	1	0	0	0
PGAL8A_00192800	423	20.791	363	0.858156	0.0446	0.001	0.0966	2696	3526	2077	PF3D7_0422600	conserved Plasmodium protein, unknown function		12.09	5.25	13.23	5.56	21.06	30.94	19.85	30.9372	61.09	48.71	44.87	51.38	70.11	56.9	43.79	0	0	0	1
PGAL8A_00192900	1173	118.916	1161	0.98977	0.001	0.001	0.0061	4222	3526	4168	PF3D7_0422700	eukaryotic initiation factor 4A-III, putative		49.92	49.68	85.17	7.52	14.06	16.78	62.02	85.1671	84.18	84.78	84.61	57.59	63.13	39.81	69.95	1	0	0	0
PGAL8A_00193000	1386	9.03	855	0.616883	0.1503	0.0467	0.2604	477	2609	362	PF3D7_0422800	serpentine receptor, putative	PfSR12	1.92	0.84	11.59	6.03	9.88	34.03	44.56	44.5583	9.87	21.24	41.22	53.19	55.57	59.25	63.01	0	0	0	1
PGAL8A_00193100	747	14.115	591	0.791165	0.0429	0.0401	0.0927	2754	2756	2139	PF3D7_0422900	methyltransferase, putative		1.72	2.39	8.69	0.81	38.62	467.13	403.04	467.132	7.79	36.07	34.5	21.1	78.67	95.81	95.31	0	1	1	0
PGAL8A_00193200	1104	36.119	201	0.182065	0.0064	0.001	0.1102	4118	3526	1804	PF3D7_0423000	conserved Plasmodium protein, unknown function		13.87	4.35	17.45	9.01	32.02	261.59	117.93	261.593	63.42	45.82	51.84	60.93	76.23	92.3	82.24	0	1	1	0
PGAL8A_00193300	441	35.069	438	0.993197	0.0021	0.001	0.0212	4209	3526	3906	PF3D7_0423100	AP-4 complex subunit sigma, putative		49.95	21.58	82.85	37.32	73.31	273.23	104.7	273.225	84.2	73.5	84.3	83.11	86.34	92.57	80.06	1	1	1	0
PGAL8A_00193400	405	13.713	210	0.518519	0.0716	0.001	0.0598	1768	3526	2891	PF3D7_0423200	BSD-domain protein, putative		7.11	1.93	27.23	13.59	31.84	222.65	78.3	222.648	50.51	32.73	62.82	68.31	76.18	90.91	74.88	0	1	0	0
PGAL8A_00193700	1119	1187.24	1041	0.930295	0.0123	0.0105	0.0282	3920	3431	3713	PF3D7_0423500	glideosome associated protein with multiple membrane spans 2	M6Tbeta	17.35	6.94	807.98	2415.9	462.29	386.27	293.83	2415.9	67.46	53.44	97.44	99.12	96.11	94.95	93.09	1	1	1	0
PGAL8A_00193900	3558	69.136	1068	0.300169	0.1001	0.4921	0.1131	1103	110	1758	PF3D7_0423600	conserved Plasmodium protein, unknown function		20.3	22.6	13.54	4.37	7.79	26.36	79.22	79.2235	70.09	74.49	45.42	47.03	50.34	52.26	75.13	0	0	0	1
PGAL8A_00022800	1182	613.557	948	0.80203	0.3437	0.1036	0.234	37	1530	475	PF3D7_0501500	rhoptry-associated protein 3		5.21	0.26	72.17	189.34	1.19	3.79	18.61	189.344	42.41	6.63	82.48	94.53	11.9	14.35	42.6	1	0	0	0
PGAL8A_00022900	1956	9.258	1401	0.716258	0.1437	0.1221	0.2291	531	1293	504	PF3D7_0501700	anaphase promoting complex subunit, putative		3.33	0.13	0.73	0.86	1.43	5.62	1.17	5.6159	27.97	3.72	8.95	21.79	13.67	17.55	14.14	0	0	0	1
PGAL8A_00023000	3102	153.85	1641	0.529014	0.0427	0.0599	0.0925	2762	2334	2145	PF3D7_0501800	chromosome assembly factor 1		3.17	5.4	49.23	10.64	3.91	9.48	35.08	49.2318	25.98	49.3	75.8	63.96	33.17	25.08	57.26	0	0	0	1
PGAL8A_00023100	1143	30.359	549	0.480315	0.1299	0.0348	0.2191	680	2886	564	PF3D7_0501900	conserved protein, unknown function		6.01	3.81	12.42	4.36	14.59	43.05	3.66	43.0548	46.41	43.79	43.24	46.98	63.8	65.31	20.12	0	0	0	1
PGAL8A_00023200	3156	10.753	1623	0.514259	0.0989	0.3291	0.0982	1123	252	2042	PF3D7_0502000	vacuolar protein sorting-associated protein 11, putative		12.19	9.14	12.5	3.39	4.52	18.76	4.03	18.7578	61.23	58.14	43.36	41.92	36.56	42.95	20.72	0	0	0	1
PGAL8A_00023300	1176	103.736	273	0.232143	0.2645	0.0889	0.095	95	1765	2101	PF3D7_0502100	HCNGP-like protein		5.48	3.26	10.74	6.25	10.3	33.69	19.85	33.6872	44.04	41.09	39.31	53.88	56.57	59.03	43.79	0	0	0	1
PGAL8A_00023400	1266	26.763	639	0.504739	0.0904	0.2293	0.1397	1287	506	1326	PF3D7_0502200	protein Mpv17, putative		13.4	11.91	22.18	6.84	10.49	30.35	4.2	30.3473	62.9	62.82	58.08	55.55	57.07	56.34	21.19	0	0	0	1
PGAL8A_00023500	570	0.911	258	0.452632	0.1271	0.001	0.1442	723	3526	1261	PF3D7_0502300	conserved Plasmodium protein, unknown function		3.62	0.28	0.67	0.68	16.8	709.97	208.9	709.972	31.08	6.9	8.55	19.57	66.59	97.06	89.46	0	1	1	0
PGAL8A_00023600	1548	0.518	534	0.344961	0.3697	0.0242	0.1264	28	3160	1548	PF3D7_0502400	merozoite surface protein 8 // ring-stage membrane protein 1	RMP1	169.97	19.14	9.54	1.31	17.72	31.56	10.14	169.965	94.03	71.46	36.71	26.87	67.47	57.45	31.78	1	0	0	0
PGAL8A_00023800	2424	5.319	1026	0.423267	0.1726	0.2273	0.2542	330	514	388	PF3D7_0502600	conserved Plasmodium protein, unknown function		4.07	3.62	5.67	0.77	3.01	17.5	11.53	17.4994	34.78	42.73	26.43	20.55	26.38	40.89	33.84	0	0	0	1
PGAL8A_00023900	1008	4.058	663	0.657738	0.0482	0.1759	0.1622	2562	794	1042	PF3D7_0502700	conserved Plasmodium protein, unknown function		4.22	3.2	5.68	0.25	1.39	4.49	8.24	8.244	35.96	40.73	26.47	13.05	13.31	15.72	28.49	0	0	0	1
PGAL8A_00024000	417	3.377	306	0.733813	0.0372	0.001	0.0698	2971	3526	2631	PF3D7_0502800	DnaJ protein, putative		12.86	4.98	1.99	0	2.13	24.35	0	24.3512	62.11	48.1	15.35	5.14	18.76	50.39	6.4	0	0	0	1
PGAL8A_00024100	249	19.208	228	0.915663	0.0046	0.001	0.0378	4161	3526	3455	PF3D7_0502900	Tim10/DDP family zinc finger protein, putative		24.73	109.22	185.07	72	696.48	576.17	67.43	696.48	73.6	91.07	91.8	89.15	97.23	96.47	71.83	1	1	0	0
PGAL8A_00024200	753	41.255	534	0.709163	0.0586	0.5279	0.0398	2190	93	3408	PF3D7_0503000	50S ribosomal protein L28, apicoplast, putative		7.81	26.73	177.62	65.56	200.99	1033.62	845.86	1033.62	52.38	76.75	91.52	88.38	93.2	97.87	98.41	1	1	1	0
PGAL8A_00024300	1494	9.736	813	0.544177	0.1068	0.4323	0.2797	996	146	300	PF3D7_0503100	4-diphosphocytidyl-2-C-methyl-D-erythritol kinase, putative		4.66	4.42	13.1	3.82	1.91	2.4	1.73	13.1033	39.05	46.1	44.64	44.35	17.19	11.94	15.49	0	0	0	1
PGAL8A_00024400	2613	62.763	1479	0.566016	0.0495	0.0537	0.0742	2501	2462	2533	PF3D7_0503200	conserved Plasmodium protein, unknown function		4.19	4.69	16.18	5.2	2.92	76.86	158.95	158.949	35.78	47.1	50.1	49.89	25.74	76.74	86.46	0	0	1	0
PGAL8A_00024600	942	597.057	414	0.43949	0.0045	0.001	0.0409	4165	3526	3374	PF3D7_0503300	serine/arginine-rich splicing factor 12		95.6	190.91	114.69	21.88	14.95	12.65	129.8	190.914	90.51	93.75	88	76.09	64.4	31.57	83.37	1	0	1	0
PGAL8A_00024700	369	33.278	330	0.894309	0.0599	0.001	0.0515	2143	3526	3110	PF3D7_0503400	actin-depolymerizing factor 1	PfADF1	37.62	138.38	2050.36	1319.81	2110.6	666.21	1023.76	2110.6	80.02	92.38	98.98	98.7	98.72	96.97	98.67	1	1	1	0
PGAL8A_00024800	2391	23.109	1164	0.486826	0.0917	0.1226	0.1247	1252	1285	1579	PF3D7_0503500	protein kinase, putative		3.52	3.14	5.03	2.76	2.41	13.37	13.15	13.3653	30.05	40.25	24.6	38.5	21.41	33.15	35.94	0	0	0	1
PGAL8A_00024900	2397	14.581	2085	0.869837	0.0714	0.0456	0.0732	1774	2631	2570	PF3D7_0503600	myosin B	PfmyoB	5.42	0.89	16.11	9.65	1.19	2.78	73.85	73.8528	43.73	21.78	49.97	62.14	11.9	12.81	73.76	0	0	0	1
PGAL8A_00025000	360	501.727	303	0.841667	0.0265	0.001	0.0557	3410	3526	2998	PF3D7_0503800	60S ribosomal protein L31		116.18	698.98	422.56	73.68	468.97	331.93	80.94	698.984	92.18	97.21	95.66	89.3	96.14	94.01	75.51	1	1	0	0
PGAL8A_00025100	1614	16.688	1089	0.674721	0.0594	0.0447	0.0887	2163	2652	2222	PF3D7_0503900	conserved Plasmodium protein, unknown function		1.63	2.55	4.1	1.48	2.21	3.17	0	4.0959	7.06	37.2	21.9	28.41	19.58	13.4	6.4	0	0	0	1
PGAL8A_00025200	5766	59.189	3072	0.532778	0.0351	0.0417	0.051	3067	2718	3118	PF3D7_0504000	cation transporting P-ATPase		4.93	24.19	32.05	7.33	1.53	3.71	10.13	32.0478	40.71	75.42	66.68	57.09	14.32	14.16	31.75	0	0	0	1
PGAL8A_00025300	438	17.403	306	0.69863	0.0752	0.001	0.1566	1654	3526	1102	PF3D7_0504100	AN1-type zinc finger protein, putative		2.35	2.68	21.87	19.86	14.61	66.37	44.12	66.3711	15.23	37.96	57.73	74.49	63.82	74.07	62.8	0	0	0	1
PGAL8A_00025400	1437	20.556	1119	0.778706	0.0995	0.0867	0.0916	1113	1802	2167	PF3D7_0504200	ATP-dependent RNA helicase DDX27, putative		3.46	12.35	43.14	189.12	92.12	108.95	16.69	189.124	29.39	63.29	73.08	94.51	88.18	82.33	40.45	1	1	0	0
PGAL8A_00025500	678	9.618	312	0.460177	0.061	1.1252	0.2136	2104	13	600	PF3D7_0504300	conserved Plasmodium protein, unknown function		2.78	0.35	3.9	0.44	22.81	91.05	33.16	91.0487	21.14	9.47	21.36	16.15	71.11	79.42	55.76	0	0	0	1
PGAL8A_00025600	2166	43.102	1731	0.799169	0.0467	0.0634	0.0444	2627	2256	3282	PF3D7_0504400	ATP-dependent helicase, putative		3.31	3.39	46.08	8.81	2.81	11.2	22.21	46.0799	27.79	41.65	74.49	60.55	24.81	28.53	46.49	0	0	0	1
PGAL8A_00025700	828	38.963	636	0.768116	0.0598	0.0792	0.1494	2150	1946	1190	PF3D7_0504500	MOLO1 domain-containing protein, putative		1.89	0.29	3.08	2.48	343.06	2789.51	701.26	2789.51	9.59	7.38	19.02	36.58	95.14	99.03	97.91	0	1	1	0
PGAL8A_00025800	1116	462.556	1005	0.900538	0.0208	0.0205	0.0218	3620	3248	3889	PF3D7_0504600	2-oxoisovalerate dehydrogenase subunit beta, mitochondrial, putative	BCKDH-E1b	6.56	1.11	93.06	126.44	61.13	20.64	42.73	126.438	48.69	24.8	85.88	92.45	84.3	45.59	62.07	1	1	0	0
PGAL8A_00025900	6915	121.019	525	0.0759219	0.0158	0.3747	0.0977	3807	200	2049	PF3D7_0504700	centrosomal protein CEP120, putative		2.77	0.75	2.68	0.21	4.13	23.13	24.41	24.4104	20.95	19.63	17.83	12.36	34.26	49.1	48.87	0	0	0	1
PGAL8A_00026000	14697	89.393	5076	0.345377	0.1114	0.1997	0.2205	906	641	552	PF3D7_0504800	conserved Plasmodium protein, unknown function		3.31	0.6	18.53	7.49	3.59	21.04	23.9	23.8977	27.73	16.44	53.49	57.5	30.88	46.17	48.23	0	0	0	1
PGAL8A_00026100	519	40.59	432	0.83237	0.0409	0.001	0.1239	2840	3526	1594	PF3D7_0504900	conserved protein, unknown function		18.1	5.81	242.43	86.64	2539.49	1080.69	261.5	2539.49	68.24	50.55	93.34	90.36	98.96	97.91	91.76	1	1	1	0
PGAL8A_00026200	7251	18.349	2646	0.364915	0.1474	0.1881	0.2145	497	702	593	PF3D7_0505000	conserved Plasmodium membrane protein, unknown function		15.71	32.9	7.59	1.25	4.69	15.01	13.16	32.8958	65.55	79.38	31.85	26.09	37.42	36.42	35.97	0	0	0	1
PGAL8A_00026300	6903	36.27	3591	0.520209	0.0755	0.192	0.141	1649	678	1307	PF3D7_0505100	trafficking protein particle complex subunit 8, putative		13.14	19.27	29.15	19.27	4.64	12.33	83.63	83.6263	62.54	71.53	64.58	74.07	37.16	31.11	76.09	0	0	0	1
PGAL8A_00026400	1818	12.401	1272	0.69967	0.05	0.064	0.0494	2480	2242	3150	PF3D7_0505200	actin-like protein, putative		5.9	7.85	15.99	10.39	2.66	12.84	30.49	30.4876	45.87	55.62	49.82	63.54	23.47	31.99	53.85	0	0	0	1
PGAL8A_00026500	1587	4.521	342	0.215501	0.162	0.1449	0.1305	383	1049	1478	PF3D7_0505300	UDP-N-acetylglucosamine transporter, putative		1.88	0.13	2.51	1.28	1.26	1.11	22.1	22.0996	9.35	3.62	17.25	26.44	12.34	9.05	46.34	0	0	0	1
PGAL8A_00026600	2082	98.78	1182	0.567723	0.0426	0.0871	0.0599	2767	1796	2887	PF3D7_0505400	conserved Plasmodium protein, unknown function		3.1	3.39	29.17	18.91	2.62	13.61	126.51	126.507	25.19	41.6	64.6	73.62	23.16	33.67	83.04	0	0	1	0
PGAL8A_00026700	3693	104.803	2931	0.793664	0.0189	0.0272	0.0233	3696	3093	3854	PF3D7_0505500	DNA mismatch repair protein MSH6, putative		4.92	6.73	80.34	22.48	4.29	6.12	20.02	80.3417	40.68	52.9	83.97	76.58	35.19	18.49	43.92	1	0	0	0
PGAL8A_00026800	810	26.076	552	0.681481	0.0271	0.0834	0.0378	3380	1864	3455	PF3D7_0505600	conserved Plasmodium protein, unknown function		10.94	7.44	17.49	4.4	14.49	312.77	30.72	312.771	59.04	54.7	51.96	47.08	63.75	93.58	53.99	0	1	0	0
PGAL8A_00026900	303	88.738	243	0.80198	0.0031	0.001	0.001	4190	3526	4217	PF3D7_0505800	small ubiquitin-related modifier	PfSUMO	822.01	916.16	1397.86	641.17	3265.73	639.53	189.32	3265.73	98.74	97.82	98.49	97.97	99.1	96.8	88.49	1	1	1	0
PGAL8A_00027000	381	23.282	297	0.779528	0.0628	0	0.0332	2038	4212	3590	PF3D7_0505900	conserved Plasmodium protein, unknown function		32.33	44.74	161.56	29.31	606.14	178.1	135.87	606.137	77.64	83.47	90.95	80.32	96.81	88.71	83.97	1	1	1	0
PGAL8A_00027100	598	15.878	204	0.341137	0.1286	0.2728	0.0763	699	367	2485	PF3D7_0506000	conserved Plasmodium protein, unknown function		31.84	16.59	16.99	7.93	35.17	127.29	20.77	127.287	77.45	68.84	51.41	58.47	77.45	84.75	44.95	0	1	0	0
PGAL8A_00027200	606	31.92	516	0.851485	0.0341	0.0733	0.0656	3116	2053	2738	PF3D7_0506100	60S ribosomal subunit protein L24, putative		29.36	28.75	21.94	1.43	37.01	260.07	147.88	260.074	76.39	77.72	57.81	28.04	78.09	92.25	85.37	0	1	1	0
PGAL8A_00027300	741	21.179	492	0.663968	0.0288	0.019	0.0368	3317	3284	3482	PF3D7_0506200	TATA-box-binding protein		10.08	5.8	7.36	1.49	12.29	71.62	18.48	71.6189	57.76	50.5	31.35	28.6	60.27	75.28	42.44	0	0	0	1
PGAL8A_00027400	954	15.082	519	0.544025	0.0288	0.102	0.1032	3317	1554	1950	PF3D7_0506300	conserved Plasmodium protein, unknown function		4.78	5.57	12.03	3.6	1.62	5.78	68.58	68.5849	39.79	49.85	42.31	43.14	15.11	17.9	72.3	0	0	0	1
PGAL8A_00027500	342	15.71	243	0.710526	0.1439	0.4677	0.3123	527	124	213	PF3D7_0506400	conserved Plasmodium protein, unknown function		2.97	0	2.81	0.84	47.31	810.84	1191.85	1191.85	23.61	1.22	18.28	21.46	81.03	97.44	98.98	0	1	1	0
PGAL8A_00027600	10479	88.174	1842	0.17578	0.0742	0.2345	0.351	1683	478	149	PF3D7_0506500	conserved Plasmodium protein, unknown function		3.35	10.6	9.73	3.84	3.51	19.2	91.61	91.612	28.28	60.88	37.15	44.52	30.07	43.64	77.96	0	0	0	1
PGAL8A_00027700	1329	18.513	405	0.30474	0.0636	0.417	0.2281	2010	166	510	PF3D7_0506600	histone deacetylase, putative, pseudogene		2.19	0.78	1.5	1.64	2.77	10.44	1.96	10.4393	12.97	20.03	13.28	29.98	24.46	27	16.08	0	0	0	1
PGAL8A_00027800	1638	9.365	993	0.606227	0.0776	0.1381	0.0821	1582	1116	2371	PF3D7_0506700	GTPase-activating protein, putative		23.85	60.27	148.52	265.83	8.63	21.08	27.3	265.834	72.82	86.58	90.31	95.98	52.59	46.27	51.5	1	0	0	0
PGAL8A_00027900	2205	22.665	1335	0.605442	0.0479	0.0955	0.04	2573	1647	3403	PF3D7_0506800	transcription factor 25, putative		64.02	26.66	34.42	12.96	6.03	20.29	98.29	98.2903	86.84	76.72	68.29	67.27	43.92	45.06	79.12	1	0	0	0
PGAL8A_00028000	1692	19.634	1206	0.712766	0.0516	0.0631	0.0434	2418	2264	3308	PF3D7_0506900	rhomboid protease ROM4		18.13	2.89	188.62	212.18	20.84	134.56	470.67	470.673	68.31	39.03	91.88	94.98	69.93	85.58	96.38	1	1	1	0
PGAL8A_00028100	318	9.796	300	0.943396	0.041	0.001	0.1469	2834	3526	1226	PF3D7_0507000	conserved Plasmodium protein, unknown function		23.96	2.74	5.18	2.77	68.82	157.29	211.19	211.19	72.89	38.29	24.96	38.58	85.74	87.4	89.56	0	1	1	0
PGAL8A_00028200	1260	4682.87	1023	0.811905	0.031	0.1053	0.0271	3228	1509	3745	PF3D7_0507100	60S ribosomal protein L4		943.21	2226.11	1174.18	466.79	57.65	37.65	1400.27	2226.11	98.84	99.1	98.3	97.46	83.68	61.68	99.19	1	1	1	0
PGAL8A_00028300	1644	17.077	861	0.523723	0.0752	0.0399	0.1112	1654	2761	1793	PF3D7_0507200	subtilisin-like protease 3	PfSUB3	6.78	3.71	29.92	28.12	6.9	72.77	98.73	98.7267	49.43	43.33	65.22	79.71	47.43	75.52	79.19	0	0	0	1
PGAL8A_00028400	2805	0.681	828	0.295187	0.1794	0.4893	0.4058	295	111	97	PF3D7_0507300	conserved Plasmodium protein, unknown function		3.35	0.41	5.86	6.79	0.25	2.06	465.33	465.334	28.27	11.61	27.18	55.41	6.02	11.41	96.31	0	0	1	0
PGAL8A_00028500	468	6.555	234	0.5	0.2574	0.128	0.8454	100	1222	8	PF3D7_0507400	conserved Plasmodium protein, unknown function		3.16	0.17	20.66	59.16	4.28	9.02	66.63	66.6254	25.93	4.33	56.4	87.55	35.16	24.1	71.55	1	0	0	0
PGAL8A_00028600	1818	24.664	1104	0.607261	0.0539	0.0514	0.0515	2348	2526	3110	PF3D7_0507500	subtilisin-like protease 1	PfSUB1	7.37	2.88	39.49	37.82	2.5	3.47	43.32	43.321	51.36	39	71.32	83.28	22.19	13.73	62.42	1	0	0	0
PGAL8A_00028700	1626	51.171	762	0.468635	0.0023	0.0053	0.0093	4207	3510	4119	PF3D7_0507600	cell differentiation protein, putative		28.03	37.08	72.38	19.2	11.06	16.58	52.14	72.3773	75.7	81.25	82.53	73.97	58.14	39.35	66.18	1	0	0	0
PGAL8A_00028800	1473	81.046	1200	0.814664	0.0257	0.0678	0.0583	3447	2184	2931	PF3D7_0507700	nuclear protein localization protein 4, putative	NPLOC4	37.48	25.29	52.64	13.44	9.85	32.8	87.67	87.665	79.95	76.04	77.27	68.1	55.48	58.37	77.12	0	0	0	1
PGAL8A_00028900	4128	55.08	1350	0.327035	0.04	0.0365	0.039	2873	2851	3426	PF3D7_0507800	conserved Plasmodium protein, unknown function		71.66	70.33	36.93	15.45	7.03	16.94	57.08	71.6643	87.83	87.83	69.85	70.38	48.05	40.12	68.1	1	0	0	0
PGAL8A_00029000	351	30.771	243	0.692308	0.2175	0.8882	0.0316	172	27	3634	PF3D7_0507900	conserved Plasmodium protein, unknown function		58.98	25.53	26.5	4.98	55.3	16.43	7.9	58.9763	86.1	76.13	62.23	49.2	83.11	38.95	27.96	1	1	0	0
PGAL8A_00029100	855	2.779	711	0.831579	0.0807	0.2804	0.0931	1504	351	2130	PF3D7_0508000	6-cysteine protein	Pf38	10.94	1.28	162.23	185.02	22.62	422	26.65	421.998	59.02	26.83	90.96	94.41	71.04	95.31	50.95	1	1	0	0
PGAL8A_00029200	4839	32.625	3060	0.632362	0.0445	0.0635	0.1075	2700	2252	1854	PF3D7_0508100	SET domain protein, putative	PfSET9	4.45	0.84	128.9	149.38	13.63	19.33	25.06	149.383	37.7	21.12	89.01	93.25	62.54	43.92	49.49	1	0	0	0
PGAL8A_00029300	1059	30.768	882	0.832861	0.0578	0.2826	0.0408	2215	343	3376	PF3D7_0508200	longevity-assurance (LAG1) protein, putative		3.42	1.48	29.2	17.34	245.27	411.26	140.18	411.255	28.99	29.27	64.65	72.25	93.87	95.17	84.51	0	1	1	0
PGAL8A_00029400	1035	74.606	813	0.785507	0.0391	0.0362	0.0345	2897	2859	3554	PF3D7_0508300	triose phosphate transporter	oTPT	43.52	51.4	96.29	23.71	28.96	16.49	13.6	96.2859	82.22	85.2	86.27	77.31	74.88	39.09	36.45	1	0	0	0
PGAL8A_00029500	1272	50.724	498	0.391509	0.0614	0.0636	0.0217	2083	2249	3892	PF3D7_0508400	conserved protein, unknown function		7.96	4.39	9.49	12.81	2.9	3.52	632.85	632.851	52.88	45.96	36.65	67.02	25.57	13.81	97.47	0	0	1	0
PGAL8A_00029600	6786	4.791	4029	0.593722	0.067	0.13	0.0943	1897	1197	2107	PF3D7_0508500	guanidine nucleotide exchange factor		6.63	0.87	16.58	19.62	2.32	4.75	6.98	19.6166	48.92	21.64	50.74	74.33	20.63	16.17	26.48	0	0	0	1
PGAL8A_00029700	822	48.443	246	0.29927	0.0089	0.0388	0.0187	4033	2790	3959	PF3D7_0508600	conserved Plasmodium protein, unknown function		27.39	9.04	43.81	88.29	47.67	72.24	79.8	88.285	75.26	57.97	73.58	90.51	81.15	75.42	75.26	1	1	0	0
PGAL8A_00029800	4305	44.555	1947	0.452265	0.021	0.0353	0.0273	3612	2877	3740	PF3D7_0508700	pre-mRNA-processing ATP-dependent RNA helicase PRP5, putative		26.77	18.97	19.57	5.32	8.51	25.4	110.1	110.104	74.78	71.3	54.8	50.41	52.22	51.34	81.13	0	0	1	0
PGAL8A_00029900	834	61.234	513	0.615108	0.0433	0.0343	0.0049	2738	2904	4186	PF3D7_0508800	single-stranded DNA-binding protein	PfSSB	4.52	9.64	57.36	16.5	1.8	36.28	24.55	57.3629	38.27	59.15	78.92	71.33	16.44	60.86	49	0	0	0	1
PGAL8A_00030100	897	66.387	786	0.876254	0.0408	0.079	0.0407	2844	1949	3381	PF3D7_0509000	SNAP protein (soluble N-ethylmaleimide-sensitive factor attachment protein), putative		25.25	18.65	98.53	44.56	98.81	191.93	403.99	403.986	73.95	70.95	86.45	85.22	88.8	89.54	95.33	1	1	1	0
PGAL8A_00030200	4428	102.395	2439	0.550813	0.0167	0.034	0.0306	3775	2914	3653	PF3D7_0509100	structural maintenance of chromosomes protein 4, putative		6.88	5.91	74.89	42.71	17.42	11.17	63.58	74.8915	49.85	50.84	83.09	84.82	67.21	28.47	70.59	1	0	0	0
PGAL8A_00030300	1041	13.98	519	0.498559	0.2264	0.066	0.1032	158	2213	1950	PF3D7_0509200	leucine-rich repeat protein	PfLRR2	10.37	1.17	2.27	0.58	17.73	40.32	50.9	50.9026	58.16	25.69	16.48	18.17	67.49	63.37	65.71	0	0	0	1
PGAL8A_00030400	450	117.455	75	0.166667	0.0272	0.001	0.0548	3373	3526	3018	PF3D7_0509300	conserved Plasmodium protein, unknown function		62.99	122.35	39.02	13.51	66.05	64.9	160.82	160.82	86.71	91.78	71.06	68.17	85.2	73.72	86.57	1	1	1	0
PGAL8A_00030500	8016	92.887	4818	0.601048	0.039	0.0148	0.0325	2900	3349	3608	PF3D7_0509400	RNA polymerase I	PfRNAPI	54.48	76.62	18.18	3.13	4.48	9.88	11.52	76.6162	85.2	88.54	53.02	40.61	36.23	25.88	33.82	1	0	0	0
PGAL8A_00030600	993	35.007	627	0.63142	0.0325	0.0798	0.1656	3186	1937	1011	PF3D7_0509500	ERCC4 domain-containing protein, putative		3.44	3.15	9.18	4.62	2.97	52.43	33.54	52.4257	29.24	40.28	35.68	47.72	26.05	69.41	56.08	0	0	0	1
PGAL8A_00030700	1923	27.985	1137	0.591264	0.0531	0.0117	0.0806	2370	3409	2394	PF3D7_0509600	asparagine--tRNA ligase		10.68	13.71	20.6	2.98	2.08	13.94	78.05	78.0521	58.59	65.41	56.33	39.64	18.44	34.41	74.83	0	0	0	1
PGAL8A_00030800	984	29.323	699	0.710366	0.1329	0.2004	0.15	648	635	1182	PF3D7_0509700	conserved Plasmodium protein, unknown function		2.72	1.4	4.29	0.49	21.57	289.18	465.2	465.2	20.43	28.09	22.45	16.94	70.33	93.04	96.3	0	1	1	0
PGAL8A_00030900	4449	80.118	2274	0.511126	0.023	0.0133	0.032	3542	3382	3624	PF3D7_0509800	phosphatidylinositol 4-kinase		47.22	67.8	57.46	29.45	12.03	20.44	69.96	69.9566	83.24	87.62	78.95	80.37	59.93	45.27	72.78	1	0	0	0
PGAL8A_00031000	927	17.702	603	0.650485	0.0383	0.3067	0.0915	2931	287	2170	PF3D7_0509900	conserved Plasmodium protein, unknown function		3.53	2.77	8.45	2.49	5.59	28.11	5.92	28.1065	30.29	38.39	33.96	36.64	41.82	54.27	24.34	0	0	0	1
PGAL8A_00031100	2559	21.463	951	0.37163	0.1242	0.2438	0.1862	765	444	801	PF3D7_0510000	conserved Plasmodium protein, unknown function		3.33	2.9	12.09	18.02	6.93	14.9	17.27	18.0175	28.02	39.16	42.44	72.96	47.62	36.18	41.1	0	0	0	1
PGAL8A_00031200	7335	112.405	1167	0.1591	0.0491	0.139	0.1282	2519	1112	1514	PF3D7_0510100	conserved Plasmodium protein, unknown function		4.06	8.34	63.74	25.81	4.47	16.17	15.63	63.7408	34.72	56.53	80.72	78.47	36.18	38.34	39.03	1	0	0	0
PGAL8A_00031300	2214	76.607	1632	0.737127	0.0639	0.021	0.047	2002	3237	3211	PF3D7_0510200	peptidyl-prolyl cis-trans isomerase		12.98	17.38	25.23	16.9	12.74	13	14.34	25.23	62.25	69.78	60.91	71.66	61.12	32.27	37.46	0	0	0	1
PGAL8A_00031400	735	35.94	555	0.755102	0.0758	0.0962	0.1135	1638	1634	1751	PF3D7_0510300	stripes inner membrane complex protein, putative // conserved basal apical peripheral protein, putative // transverse sutures component 1, putative	CBAP	4.65	0.75	1.55	0	206.44	267.79	515.47	515.47	38.98	19.53	13.55	5.14	93.4	92.5	96.8	0	1	1	0
PGAL8A_00031600	1302	14.349	648	0.497696	0.273	0.063	0.1929	81	2267	748	PF3D7_0510400	PDCD2 domain-containing protein, putative		6.8	4.2	2.37	0.22	1.25	6.61	19.08	19.079	49.58	45.14	16.77	12.6	12.26	19.35	42.98	0	0	0	1
PGAL8A_00031700	2595	281.713	1686	0.649711	0.0114	0.014	0.0353	3946	3366	3531	PF3D7_0510500	topoisomerase I		7.95	20.07	32.46	8.86	3.67	22.08	37.75	37.7544	52.83	72.34	66.9	60.69	31.4	47.65	59.01	0	0	0	1
PGAL8A_00031900	1050	5.507	528	0.502857	0.228	0.3708	0.5725	154	205	36	PF3D7_0510700	conserved Plasmodium protein, unknown function		1.1	0.53	0	0	6.74	287.75	21.44	287.746	3.95	14.75	1.45	5.14	46.91	93.01	45.68	0	1	0	0
PGAL8A_00032000	1917	7.3	1305	0.680751	0.1101	0.0953	0.1585	927	1652	1079	PF3D7_0510800	WD repeat-containing protein, putative		3.03	0.41	1.32	0.3	10.72	23.12	22.48	23.116	24.44	11.42	12.48	14.09	57.49	49.04	46.81	0	0	0	1
PGAL8A_00032200	516	708.759	513	0.994186	0.0359	0.2536	0.0313	3023	414	3641	PF3D7_0511000	translationally-controlled tumor protein homolog // histamine-releasing factor	PfTCTP	284.03	287.51	354.04	121.89	364.01	1518.68	509.76	1518.68	96.12	95.15	94.91	92.25	95.36	98.49	96.73	1	1	1	0
PGAL8A_00032300	360	15.826	207	0.575	0.0473	0	0.0354	2603	4212	3527	PF3D7_0511100	conserved Plasmodium protein, unknown function		3.19	2.2	4.8	0	94.09	874.05	34.98	874.047	26.16	34.65	23.85	5.14	88.32	97.58	57.15	0	1	0	0
PGAL8A_00032400	2847	92.065	1806	0.634352	0.0676	0.1233	0.0808	1884	1273	2389	PF3D7_0511200	stearoyl-CoA desaturase		5.16	0.86	66.35	53.21	8.1	132.04	10.8	132.038	42.17	21.46	81.39	86.76	51.08	85.25	32.75	1	1	0	0
PGAL8A_00032500	3765	57.481	2136	0.567331	0.1143	0.0829	0.2871	868	1875	281	PF3D7_0511300	MORN repeat protein, putative		1.89	4.34	5.63	1.17	1.63	10.3	17.43	17.4316	9.54	45.75	26.24	25.1	15.22	26.67	41.35	0	0	0	1
PGAL8A_00032700	1353	2.238	333	0.24612	0.2005	0.3617	0.5055	221	216	53	PF3D7_0511400	conserved Plasmodium protein, unknown function		1.55	1.25	1.44	0.26	1.34	4.06	12.21	12.2088	6.61	26.43	13.02	13.14	13.03	15.06	34.71	0	0	0	1
PGAL8A_00032900	486	9.906	156	0.320988	0.0513	0.001	0.2765	2428	3526	313	PF3D7_0511600	apical rhoptry neck protein		20.98	2.66	8.66	7.5	4.21	7.27	4.46	20.9775	70.61	37.81	34.45	57.52	34.65	20.55	21.71	0	0	0	1
PGAL8A_00033000	537	19.044	417	0.776536	0.0176	0.0471	0.1281	3746	2603	1517	PF3D7_0511700	EKC/KEOPS complex subunit CGI121		38.28	4.55	7.01	8.16	12.02	8.62	5.18	38.2756	80.34	46.62	30.48	58.99	59.84	23.41	23.18	1	0	0	0
PGAL8A_00033100	1803	1.636	1563	0.866889	0.0599	0.0518	0.0313	2143	2515	3641	PF3D7_0511800	inositol-3-phosphate synthase		88.63	22.94	151.57	51.33	5.45	42.89	175.76	175.759	89.84	74.71	90.48	86.46	41.25	65.22	87.64	1	0	1	0
PGAL8A_00033200	1914	3.962	639	0.333856	0.159	0.1509	0.228	403	993	513	PF3D7_0511900	conserved Plasmodium protein, unknown function		2.33	1.55	2.21	0.54	1.81	4.55	0	4.5528	14.9	29.89	16.27	17.67	16.5	15.86	6.4	0	0	0	1
PGAL8A_00033300	360	62.473	255	0.708333	0.0157	0.001	0.033	3812	3526	3596	PF3D7_0512000	prefoldin subunit 6, putative		60.6	152.64	111.78	61.23	912.45	785.19	334.24	912.45	86.34	93.01	87.76	87.87	97.68	97.35	94.06	1	1	1	0
PGAL8A_00033400	378	28.303	180	0.47619	0.084	0.001	0.0405	1431	3526	3386	PF3D7_0512100	conserved Plasmodium protein, unknown function		4.86	2.25	6.59	1.52	63.08	323.12	104.84	323.123	40.19	35.07	29.27	29.04	84.65	93.73	80.1	0	1	1	0
PGAL8A_00033600	783	61.194	645	0.823755	0.0503	0.0418	0.054	2472	2715	3040	PF3D7_0512300	CDK-activating kinase assembly factor MAT1	PfMAT1	14.8	10.23	13.66	1.5	12.92	47.42	62.54	62.541	64.6	60.19	45.65	28.73	61.4	67.37	70.17	0	0	0	1
PGAL8A_00033700	693	1.283	282	0.406926	0.1032	0.204	0.3076	1056	613	222	PF3D7_0512400	conserved Plasmodium protein, unknown function		4.74	1.12	0.58	0	3.12	24.2	331.43	331.426	39.55	25.04	7.98	5.14	27.16	50.29	93.92	0	0	1	0
PGAL8A_00033800	1824	14.888	594	0.325658	0.1908	0.6724	0.234	253	54	475	PF3D7_0512450	conserved Plasmodium protein, unknown function, pseudogene
PGAL8A_00033900	2262	33.285	1077	0.476127	0.0823	0.9141	0.167	1466	24	994	PF3D7_0512500	conserved Plasmodium protein, unknown function		2.72	1.07	8.82	3.59	3.63	17.62	6.27	17.6176	20.39	24.27	34.76	43.1	31.14	41.04	25.06	0	0	0	1
PGAL8A_00034000	603	135.987	552	0.915423	0.0275	0.001	0.0133	3359	3526	4048	PF3D7_0512600	ras-related protein Rab-1B		109.24	42.6	374.61	181.32	581.77	767.78	176.34	767.778	91.73	82.88	95.19	94.18	96.68	97.27	87.73	1	1	1	0
PGAL8A_00034100	723	57.22	399	0.551867	0.1036	0.1006	0.102	1048	1576	1977	PF3D7_0512700	orotate phosphoribosyltransferase	PfOPRT	10.86	18.84	9.82	0.69	13.13	34.83	19.85	34.833	58.91	71.13	37.3	19.71	61.83	59.79	43.79	0	0	0	1
PGAL8A_00034200	3783	3.342	1275	0.337034	0.2013	0.7739	0.3516	219	38	147	PF3D7_0512800	conserved Plasmodium protein, unknown function		3.85	7.34	6.6	0.66	4.17	20.51	22.68	22.6809	32.98	54.47	29.29	19.27	34.48	45.37	47	0	0	0	1
PGAL8A_00034300	846	1.544	468	0.553191	0.0455	0.0506	0.1799	2669	2541	867	PF3D7_0512900	AKAP-like protein // A-kinase anchor protein-like		5.89	5.37	16.4	3.68	1.79	8.14	7.01	16.3963	45.75	49.18	50.39	43.73	16.36	22.4	26.54	0	0	0	1
PGAL8A_00034400	807	9.758	675	0.836431	0.0503	0.0715	0.0926	2472	2100	2144	PF3D7_0513000	conserved Plasmodium protein, unknown function		5.41	6.85	15.85	2.9	39.92	313.79	215.92	313.788	43.64	53.13	49.51	39.28	79	93.61	89.79	0	1	1	0
PGAL8A_00034500	753	21.155	630	0.836653	0.0294	0.001	0.0378	3289	3526	3455	PF3D7_0513100	conserved Plasmodium protein, unknown function		27.75	7.45	88.82	85.92	115.93	625.09	101.79	625.088	75.52	54.72	85.17	90.31	90.05	96.71	79.66	1	1	0	0
PGAL8A_00034600	6765	39.238	3099	0.458093	0.086	0.1325	0.1413	1393	1172	1303	PF3D7_0513200	conserved Plasmodium protein, unknown function		39.5	14.68	16.26	9.5	3.79	16.8	34.25	39.5043	80.8	66.68	50.22	61.88	32.25	39.83	56.59	1	0	0	0
PGAL8A_00034700	738	39.844	729	0.987805	0.0564	0.0189	0.0177	2268	3286	3974	PF3D7_0513300	purine nucleoside phosphorylase	PfPNP	240.88	632.61	847.44	133.81	163.47	36.78	348.84	847.44	95.53	96.94	97.65	92.76	92.3	61.09	94.27	1	1	1	0
PGAL8A_00034800	855	8.296	666	0.778947	0.0836	0.0561	0.1065	1440	2414	1876	PF3D7_0513400	GTP-binding protein, putative		6.3	6.63	19.21	1.37	26.44	61.13	52	61.1343	47.64	52.66	54.41	27.38	73.43	72.53	66.05	0	0	0	1
PGAL8A_00034900	375	11.537	318	0.848	0.0593	0.1254	0.0254	2168	1248	3799	PF3D7_0513500	mitochondrial import inner membrane translocase subunit TIM16, putative		8.07	20.09	10.97	0.78	53.37	156.65	59.7	156.65	53.16	72.37	39.9	20.72	82.71	87.29	69.03	0	1	0	0
PGAL8A_00035000	2331	51.14	1392	0.597169	0.0592	0.2987	0.1505	2171	310	1169	PF3D7_0513600	deoxyribodipyrimidine photo-lyase, putative		7.9	33.07	85.12	16.01	31.62	90.85	686.17	686.17	52.64	79.47	84.59	70.99	76.06	79.4	97.82	1	0	1	0
PGAL8A_00035200	2151	20.246	1758	0.817294	0.1197	0.1005	0.062	815	1578	2829	PF3D7_0513700	secreted ookinete protein, putative // 6-cysteine protein		2.55	0.68	3.65	0.53	10.31	142.2	124.83	142.2	17.96	18.33	20.74	17.58	56.6	86.2	82.9	0	1	1	0
PGAL8A_00035300	621	67.859	519	0.835749	0.0087	0.0067	0.0112	4041	3503	4084	PF3D7_0513800	ras-related protein Rab-1A		5.35	6.86	109.85	25.43	99.4	436.99	188.34	436.992	43.39	53.21	87.54	78.29	88.85	95.48	88.42	1	1	1	0
PGAL8A_00035400	717	11.41	612	0.853556	0.1281	1.1099	0.1846	708	14	826	PF3D7_0513900	conserved Plasmodium protein, unknown function		1.96	2.02	15.75	6.69	60.65	75.65	46.83	75.6548	10.16	33.17	49.33	55.08	84.21	76.35	64.15	0	1	0	0
PGAL8A_00035500	1266	37.387	1131	0.893365	0.0301	0.081	0.0445	3251	1904	3278	PF3D7_0514000	tubulin--tyrosine ligase, putative		2.48	0.57	7.3	1.86	4.01	19.19	60.93	60.9282	16.89	15.68	31.19	31.75	33.63	43.62	69.62	0	0	0	1
PGAL8A_00035600	3384	30.91	1566	0.462766	0.0428	0.0795	0.0635	2760	1943	2793	PF3D7_0514100	ATP-dependent DNA helicase UvrD		3.09	3.06	24.44	13.93	10.98	26.96	37.19	37.1937	25.06	39.92	60.31	68.74	58.01	52.95	58.58	0	0	0	1
PGAL8A_00035700	1695	11.742	966	0.569912	0.1421	0.0598	0.1334	549	2338	1425	PF3D7_0514200	conserved Plasmodium protein, unknown function		3.89	4.05	18.23	8.58	3.89	23.9	12.9	23.8991	33.22	44.5	53.12	59.93	32.98	50.01	35.64	0	0	0	1
PGAL8A_00035800	2976	24.881	987	0.331653	0.0763	0.1007	0.1279	1618	1574	1520	PF3D7_0514300	aspartate--tRNA ligase, putative		6.26	10.32	17.49	4.69	3.28	12.31	14.46	17.4931	47.38	60.39	51.98	47.98	28.39	31.05	37.6	0	0	0	1
PGAL8A_00036100	462	16.584	300	0.649351	0.1494	0.3693	0.1366	483	209	1371	PF3D7_0514500	conserved Plasmodium membrane protein, unknown function		4.99	0.86	2.03	0.45	164.11	867.05	390.81	867.045	41.27	21.39	15.55	16.34	92.33	97.56	95.15	0	1	1	0
PGAL8A_00022500	645	10.296	591	0.916279	0.0485	0.001	0.089	2545	3526	2218	PF3D7_0514600	ribose-5-phosphate isomerase, putative		73.12	109.07	59.26	27.7	110.28	185.69	88.55	185.693	87.95	91.03	79.44	79.47	89.75	89.09	77.38	1	1	0	0
PGAL8A_00036200	4308	16.273	1224	0.284123	0.1733	0.1901	0.226	328	692	528	PF3D7_0514700	conserved Plasmodium protein, unknown function		2.03	0.37	0.47	0.31	1.57	7.14	3.29	7.1414	10.97	10.26	7.25	14.19	14.64	20.3	19.32	0	0	0	1
PGAL8A_00036300	3552	15.044	975	0.274493	0.0942	0.3487	0.137	1206	229	1364	PF3D7_0514800	inositol polyphosphate multikinase, putative		6.77	5.82	9.35	2.49	0.77	5.97	7.22	9.3457	49.4	50.61	36.28	36.73	9.26	18.18	26.9	0	0	0	1
PGAL8A_00036400	960	28.139	333	0.346875	0.0642	0.0683	0.0346	1989	2169	3553	PF3D7_0514900	conserved Plasmodium protein, unknown function		39.63	12.7	26.43	6.7	27.97	92.89	22.31	92.8885	80.87	63.89	62.14	55.13	74.26	79.83	46.55	1	0	0	0
PGAL8A_00036500	2526	205.104	804	0.31829	0.0071	0.029	0.0848	4090	3056	2302	PF3D7_0515000	pre-mRNA-splicing factor CWC2, putative		55.66	89.35	165.49	165.82	10.84	27.17	84.6	165.822	85.51	89.72	91.09	93.7	57.66	53.19	76.3	1	0	0	0
PGAL8A_00036600	1191	2.979	630	0.528967	0.0903	0.1808	0.0845	1292	754	2311	PF3D7_0515100	rhomboid protease ROM9		4.13	3.95	23.95	10.22	39.13	53.66	19.07	53.6555	35.21	44.19	59.89	63.25	78.86	69.92	42.96	0	0	0	1
PGAL8A_00036800	5901	30.821	2241	0.379766	0.0437	0.0719	0.0734	2722	2090	2558	PF3D7_0515300	phosphatidylinositol 3-kinase	VPS34	13.78	18.42	43.82	50.82	8.25	21.32	20.76	50.8215	63.29	70.71	73.64	86.43	51.51	46.75	44.94	1	0	0	0
PGAL8A_00036900	1929	161.95	765	0.396579	0.0724	0.1265	0.0886	1742	1236	2226	PF3D7_0515400	conserved Plasmodium protein, unknown function		2.79	0.35	26.85	33.43	4.09	62	216.05	216.052	21.19	9.29	62.54	81.89	34.12	72.93	89.8	1	0	1	0
PGAL8A_00037000	2700	1.465	1419	0.525556	0.0734	0.155	0.0828	1716	957	2352	PF3D7_0515500	amino acid transporter, putative		1.74	0.22	2.08	0.51	9.88	60.69	16.5	60.6905	7.93	5.37	15.79	17.19	55.53	72.41	40.26	0	0	0	1
PGAL8A_00037100	4077	27.771	2043	0.501104	0.0975	0.1319	0.163	1152	1174	1033	PF3D7_0515600	conserved Plasmodium protein, unknown function		2.75	0.63	5.7	3.45	17.99	39.75	80.9	80.8984	20.81	17.14	26.52	42.31	67.77	62.97	75.47	0	0	0	1
PGAL8A_00037200	1389	660.261	1134	0.816415	0.0231	0.001	0.014	3537	3526	4037	PF3D7_0515700	glideosome-associated protein 40, putative		18.12	4.86	1022	1489.71	295.1	85.55	253.09	1489.71	68.25	47.57	98.03	98.77	94.62	78.41	91.41	1	1	1	0
PGAL8A_00037300	267	22.215	252	0.94382	0.0643	0.001	0.0664	1984	3526	2721	PF3D7_0515800	BolA-like protein, putative		10.23	17.41	43.57	0	125.5	157	21.95	157	57.94	69.81	73.43	5.14	90.5	87.31	46.15	0	1	0	0
PGAL8A_00037400	981	41.545	900	0.917431	0.0266	0.0244	0.039	3404	3150	3426	PF3D7_0515900	NLI interacting factor-like phosphatase, putative		3.81	19.44	24.93	15.78	7.8	39.38	8.51	39.3836	32.59	71.72	60.74	70.78	50.35	62.7	29.01	0	0	0	1
PGAL8A_00037500	2979	48.472	1491	0.500504	0.0532	0.1862	0.1055	2367	716	1902	PF3D7_0516000	RAP protein, putative		3.85	13.5	6.93	1.44	4.7	19.69	8.6	19.6851	32.96	65.12	30.34	28.18	37.44	44.28	29.14	0	0	0	1
PGAL8A_00037700	456	557.466	378	0.828947	0.0065	0.001	0.0114	4112	3526	4082	PF3D7_0516200	40S ribosomal protein S11		696.15	1551.74	926.31	566.55	1139.5	241.92	184.1	1551.74	98.49	98.63	97.78	97.72	98.04	91.52	88.25	1	1	1	0
PGAL8A_00037800	1566	4.245	888	0.56705	0.0449	0.044	0.1058	2688	2671	1891	PF3D7_0516300	tRNA pseudouridine synthase, putative		26.22	17.83	9.73	0.57	2.26	7.82	17.78	26.2245	74.42	70.16	37.16	18.13	20.05	21.78	41.84	0	0	0	1
PGAL8A_00037900	945	119.554	480	0.507937	0.0258	0.0536	0.0599	3445	2468	2887	PF3D7_0516400	phosducin-like protein, putative		6.73	27.3	53.23	253.38	43.75	223.49	267.89	267.89	49.23	77.05	77.46	95.81	80.16	90.95	91.99	1	1	1	0
PGAL8A_00038000	1329	22.327	1041	0.783296	0.0575	0.001	0.0835	2228	3526	2336	PF3D7_0516500	major facilitator superfamily domain-containing protein, putative		8.33	2.63	25.08	13.05	58.5	516.7	433.74	516.704	53.78	37.63	60.79	67.41	83.85	96.11	95.9	0	1	1	0
PGAL8A_00038100	4638	61.436	1944	0.419146	0.0675	0.0739	0.0912	1888	2044	2180	PF3D7_0516600	sporozoite surface antigen MB2 // translation initiation factor IF-2	PfMB2	12.46	25.18	28.49	15.81	4.69	9.11	15.92	28.4859	61.61	75.99	64.01	70.83	37.36	24.25	39.43	0	0	0	1
PGAL8A_00038200	3540	66.025	2634	0.744068	0.0296	0.0238	0.0361	3273	3167	3502	PF3D7_0516700	ubiquitin carboxyl-terminal hydrolase 2, putative		12.76	12.87	33.19	19.92	4.87	5.77	22.74	33.192	62.06	64.19	67.32	74.54	38.39	17.85	47.05	0	0	0	1
PGAL8A_00038300	5982	115.663	1326	0.221665	0.032	0.0939	0.0685	3200	1676	2663	PF3D7_0516800	AP2 domain transcription factor AP2-O2, putative	ApiAP2	6.74	1.84	66.84	23.72	10.89	74.38	138.21	138.208	49.3	32.04	81.46	77.32	57.83	75.99	84.33	1	0	1	0
PGAL8A_00038400	783	1331.88	729	0.931034	0.0058	0.001	0.0112	4128	3526	4084	PF3D7_0516900	60S ribosomal protein L2		1513.69	6004.14	2352.7	1980.05	236.79	88.15	280.54	6004.14	99.32	99.58	99.13	99.05	93.79	78.83	92.63	1	1	1	0
PGAL8A_00038500	498	234.73	438	0.879518	0.009	0.001	0.0065	4030	3526	4160	PF3D7_0517000	60S ribosomal protein L12, putative		525.5	1400.01	777.47	157.58	658.28	221.9	452.33	1400.01	97.89	98.48	97.35	93.53	97.06	90.88	96.12	1	1	1	0
PGAL8A_00038600	1368	10.333	774	0.565789	0.1618	0.2879	0.2179	384	332	573	PF3D7_0517100	conserved Plasmodium protein, unknown function		33.05	5.98	7.02	1.23	7.68	23.1	15.64	33.0453	78.03	51.01	30.52	25.91	50.11	48.99	39.09	0	0	0	1
PGAL8A_00038700	2493	2.518	924	0.370638	0.1577	0.2345	0.2206	411	478	551	PF3D7_0517200	conserved Plasmodium protein, unknown function		125.77	41.25	16.86	3.4	3.53	13.32	985.07	985.067	92.61	82.34	51.12	42.05	30.26	33.06	98.62	1	0	1	0
PGAL8A_00038800	903	1100.41	495	0.548173	0.0556	0.001	0.0246	2292	3526	3826	PF3D7_0517300	serine/arginine-rich splicing factor 1		742.24	722.64	533.93	169.07	85.82	44.63	216.81	742.238	98.6	97.28	96.52	93.87	87.69	65.99	89.84	1	1	1	0
PGAL8A_00038900	3165	261.201	2589	0.818009	0.0262	0.0309	0.0214	3424	2999	3898	PF3D7_0517400	FACT complex subunit SPT16, putative		71.82	179.85	251.48	319.65	49.98	22.3	473.32	473.32	87.88	93.49	93.54	96.56	81.86	48.04	96.43	1	1	1	0
PGAL8A_00039000	2169	22.936	1566	0.721992	0.0375	0.0451	0.1315	2961	2645	1459	PF3D7_0517500	UTP--glucose-1-phosphate uridylyltransferase, putative		9.3	1.99	3.86	5.61	14.35	86.45	43.97	86.4487	56.24	33.04	21.29	51.67	63.53	78.6	62.75	0	0	0	1
PGAL8A_00039100	906	9.073	714	0.788079	0.039	0.0666	0.1039	2900	2205	1934	PF3D7_0517600	F-actin-capping protein subunit beta, putative		9.62	2.26	3.84	5.35	13.64	40.03	28.65	40.0319	56.93	35.09	21.17	50.53	62.58	63.18	52.5	0	0	0	1
PGAL8A_00039200	2151	146.076	1890	0.878661	0.0176	0.0052	0.0161	3746	3511	4009	PF3D7_0517700	eukaryotic translation initiation factor 3 subunit B, putative		92.74	98.68	91.47	9.84	20.09	15.05	69.6	98.6806	90.2	90.53	85.6	62.71	69.47	36.52	72.63	1	0	0	0
PGAL8A_00039300	786	31.666	444	0.564885	0.0361	0.3901	0.1239	3015	187	1594	PF3D7_0517800	apicortin, putative // doublecortin domain-containing protein, putative		8.01	1.55	2.3	1.23	21.01	257.69	105.37	257.687	53.02	29.83	16.62	25.86	70.07	92.18	80.2	0	1	1	0
PGAL8A_00039500	1650	45.482	1359	0.823636	0.0408	0.0879	0.1016	2844	1781	1984	PF3D7_0517900	zinc finger protein, putative		8.44	1.98	72.12	55.36	15.03	24.77	23.28	72.1206	54.06	32.99	82.46	87.03	64.58	50.75	47.48	1	0	0	0
PGAL8A_00039600	813	154.717	438	0.538745	0.0489	0.0456	0.077	2525	2631	2467	PF3D7_0518000	NOSIP domain-containing protein, putative		42.24	14.14	27.94	14.46	55.59	136.28	80.88	136.284	81.72	65.95	63.53	69.41	83.26	85.77	75.45	1	1	0	0
PGAL8A_00039700	3633	31.695	1686	0.464079	0.1116	0.0997	0.1499	901	1588	1185	PF3D7_0518100	RAP protein, putative		7.24	10.9	13.42	2.7	2.44	12.5	53.06	53.0589	50.89	61.38	45.23	38.05	21.63	31.37	66.61	0	0	0	1
PGAL8A_00039800	435	107.327	306	0.703448	0.0422	0.1547	0.0334	2781	959	3583	PF3D7_0518200	SWIB/MDM2 domain-containing protein		5.01	0.8	78.97	41.56	55.54	192.16	67.13	192.16	41.38	20.52	83.76	84.58	83.23	89.56	71.72	1	1	0	0
PGAL8A_00039900	726	120.456	666	0.917355	0.0834	0.001	0.0264	1445	3526	3770	PF3D7_0518300	proteasome subunit beta type-1, putative		57.32	66.68	255.41	93.09	230.74	134.48	38.7	255.409	85.81	87.52	93.6	90.81	93.73	85.56	59.7	1	1	0	0
PGAL8A_00040000	672	28.118	522	0.776786	0.0429	0.0772	0.0781	2754	1985	2450	PF3D7_0518400	cyclin, putative	Pfcyc-3	2.57	0.57	2.62	0	9.88	74.46	30.42	74.4586	18.14	15.87	17.66	5.14	55.55	76.04	53.82	0	0	0	1
PGAL8A_00040100	2721	124.982	1731	0.636163	0.0189	0.0284	0.0268	3696	3073	3757	PF3D7_0518500	ATP-dependent RNA helicase DDX23, putative	PRP28	68.04	39.76	70.38	22.05	8.84	13.08	53.11	70.3816	87.33	82.07	82.03	76.25	53.11	32.58	66.63	1	0	0	0
PGAL8A_00066000	3108	81.183	1647	0.529923	0.0591	0.0194	0.0537	2172	3274	3046	PF3D7_0518600	WD repeat-containing protein 26, putative		4.36	0.99	33.87	10.97	26.18	53.97	62.09	62.0863	37.2	23.25	67.96	64.43	73.19	70.04	69.97	0	0	0	1
PGAL8A_00066200	606	13.656	339	0.559406	0.1807	0.5605	0.1851	288	81	816	PF3D7_0518800	secreted ookinete protein, putative		2.9	0.26	0.4	0	450.48	6552.74	1586.6	6552.74	22.68	6.47	6.73	5.14	95.98	99.58	99.29	0	1	1	0
PGAL8A_00066300	642	3.627	384	0.598131	0.107	0.001	0.1799	989	3526	867	PF3D7_0518900	conserved Plasmodium protein, unknown function		2.86	0.81	0.42	0	25.19	29.99	413.76	413.761	22.1	20.75	6.82	5.14	72.67	56	95.55	0	0	1	0
PGAL8A_00066500	375	35.493	366	0.976	0.0082	0.0626	0.001	4049	2283	4217	PF3D7_0519100	50S ribosomal protein L14, mitochondrial, putative		15.87	6.98	34.45	15.68	66.28	87.63	55.97	87.6308	65.73	53.52	68.32	70.52	85.25	78.78	67.76	0	1	0	0
PGAL8A_00066600	495	438.901	330	0.666667	0.0268	0.0453	0.0402	3397	2641	3396	PF3D7_0519200	V-type proton ATPase 16 kDa proteolipid subunit		280.67	1025.53	1694.73	1569.3	2126.54	639.04	488.85	2126.54	96.07	98.06	98.81	98.81	98.74	96.78	96.54	1	1	1	0
PGAL8A_00066700	1467	61.055	804	0.548057	0.0394	0.274	0.2159	2889	364	589	PF3D7_0519300	protoheme IX farnesyltransferase, putative		4.93	2.65	31.4	3.47	14.4	22.75	16.53	31.4032	40.78	37.77	66.26	42.43	63.61	48.5	40.37	0	0	0	1
PGAL8A_00066800	402	434.103	399	0.992537	0.0455	0.001	0.0246	2669	3526	3826	PF3D7_0519400	40S ribosomal protein S24		1153.72	1063.72	573.37	184.24	686.36	362.19	355	1153.72	99.07	98.11	96.75	94.34	97.18	94.6	94.43	1	1	1	0
PGAL8A_00066900	5775	49.058	1971	0.341299	0.0269	0.0262	0.0401	3391	3110	3401	PF3D7_0519500	carbon catabolite repressor protein 4, putative		16.59	69.08	25.93	9.09	7.17	23.71	32.6	69.0756	66.61	87.73	61.43	61.09	48.43	49.73	55.39	1	0	0	0
PGAL8A_00067000	1776	9.727	918	0.516892	0.0357	0.1345	0.2058	3038	1152	648	PF3D7_0519600	zinc finger protein, putative		16.8	18.6	23.66	5.96	2.47	5.21	4.32	23.6568	66.94	70.86	59.6	53.07	21.87	16.93	21.44	0	0	0	1
PGAL8A_00067100	381	137.426	267	0.700787	0.0269	0.001	0.0276	3391	3526	3733	PF3D7_0519700	FoP domain-containing protein, putative		109.98	62.17	80.3	21.32	45.77	81.87	130.49	130.489	91.8	86.83	83.94	75.75	80.68	77.77	83.42	1	1	1	0
PGAL8A_00067200	3258	71.117	762	0.233886	0.039	0.001	0.084	2900	3526	2328	PF3D7_0519800	EELM2 domain-containing protein, putative		124.67	249.09	84.42	34.41	44.49	30.14	948.09	948.092	92.56	94.81	84.51	82.26	80.41	56.17	98.55	1	1	1	0
PGAL8A_00067300	1293	86.452	582	0.450116	0.051	0.1366	0.2382	2448	1134	454	PF3D7_0519900	conserved Plasmodium protein, unknown function		3.7	5.53	8.71	3.17	3.28	20.64	26.6	26.5994	31.92	49.73	34.55	40.85	28.37	45.61	50.89	0	0	0	1
PGAL8A_00067400	573	878.792	528	0.921466	0.0121	0.001	0.0188	3929	3526	3957	PF3D7_0520000	40S ribosomal protein S9, putative		671.93	1076.97	646.92	322.79	668.51	171.43	309.28	1076.97	98.41	98.15	97.04	96.64	97.13	88.42	93.47	1	1	1	0
PGAL8A_00067500	1920	83.95	1164	0.60625	0.0507	0.118	0.113	2458	1344	1763	PF3D7_0520100	protein phosphatase PPM9, putative		17.37	16.26	13.23	3.05	7.26	9.78	6.6	17.3734	67.51	68.46	44.88	40.14	48.83	25.64	25.65	0	0	0	1
PGAL8A_00067600	2427	23.12	1221	0.50309	0.0767	0.0272	0.1	1607	3093	2008	PF3D7_0520200	conserved Plasmodium protein, unknown function		5.63	14.31	19.49	3.51	2.57	6.2	24.05	24.0538	44.66	66.21	54.67	42.63	22.68	18.68	48.54	0	0	0	1
PGAL8A_00067700	900	79.294	474	0.526667	0.0652	0.001	0.1502	1961	3526	1179	PF3D7_0520400	single-stranded DNA-binding protein, putative		3.23	5.43	24.71	5.84	4.49	16.69	3.09	24.7054	26.8	49.44	60.52	52.59	36.32	39.59	18.68	0	0	0	1
PGAL8A_00067900	447	16.032	393	0.879195	0.0998	0.1618	0.1509	1109	902	1159	PF3D7_0520600	bis(5'-nucleosyl)-tetraphosphatase [asymmetrical] // Ap4A hydrolase		87.33	58.56	38.37	7.04	92.72	28.51	21.34	92.7202	89.65	86.36	70.76	56.07	88.21	54.61	45.59	1	1	0	0
PGAL8A_00068000	2772	28.727	1305	0.470779	0.0759	0.0859	0.1825	1634	1820	847	PF3D7_0520700	CDC73 domain-containing protein, putative		8.89	12.36	6.58	1.31	2.78	15.24	0.96	15.2447	55.22	63.3	29.25	26.8	24.58	36.9	13.73	0	0	0	1
PGAL8A_00068100	5553	23.223	3459	0.622907	0.0921	0.053	0.0966	1244	2488	2077	PF3D7_0520800	conserved Plasmodium protein, unknown function		7.13	9.57	18.75	3.72	1.44	4.69	5.67	18.754	50.58	59.03	53.83	43.95	13.76	16.03	23.92	0	0	0	1
PGAL8A_00068200	1434	171.537	1395	0.972803	0.0196	0.0344	0.0503	3672	2901	3132	PF3D7_0520900	S-adenosyl-L-homocysteine hydrolase // adenosylhomocysteinase		136.43	148.84	871.48	295.34	21.61	11.44	41.78	871.483	93.11	92.89	97.7	96.28	70.37	29.13	61.61	1	0	0	0
PGAL8A_00068400	4446	6.959	2382	0.535762	0.13	0.222	0.1536	677	529	1133	PF3D7_0521100	conserved Plasmodium protein, unknown function		1.37	0.21	0.68	0.45	0.91	3.39	0.61	3.3856	5.35	5.03	8.67	16.27	10.04	13.66	13.1	0	0	0	1
PGAL8A_00068500	978	13.087	495	0.506135	0.0532	0.0731	0.0643	2367	2059	2765	PF3D7_0521200	conserved Plasmodium protein, unknown function		3.07	0.72	5	0	5.35	27.5	24.1	27.4997	24.82	19.09	24.55	5.14	40.83	53.68	48.57	0	0	0	1
PGAL8A_00068600	3693	31.766	1023	0.277011	0.0642	0.2035	0.1555	1989	617	1116	PF3D7_0521300	conserved Plasmodium protein, unknown function		16.78	7.87	10.37	1.67	3.89	27.68	14.55	27.679	66.87	55.74	38.57	30.31	33.04	53.83	37.77	0	0	0	1
PGAL8A_00068700	1533	19.566	792	0.516634	0.0238	0.0537	0.0418	3511	2462	3341	PF3D7_0521400	conserved Plasmodium protein, unknown function		2.47	5.3	12.42	2.44	1.82	9.13	6.63	12.424	16.83	48.99	43.26	36.25	16.6	24.29	25.71	0	0	0	1
PGAL8A_00068800	1488	21.797	846	0.568548	0.0377	0.0326	0.1267	2957	2952	1544	PF3D7_0521500	ribosomal large subunit pseudouridylate synthase, putative		6.49	9.64	15.63	4.02	1.43	7.81	5.73	15.6262	48.31	59.13	49.16	45.44	13.59	21.72	23.99	0	0	0	1
PGAL8A_00068900	279	3.919	126	0.451613	1.2127	0.001	0.6961	1	3526	21	PF3D7_0521600	conserved Plasmodium protein, unknown function		3.95	1.91	2.26	0	11.72	58.63	19.23	58.6284	33.72	32.54	16.46	5.14	59.48	71.58	43.19	0	0	0	1
PGAL8A_00069000	2367	10.572	1815	0.766793	0.0273	0.0609	0.0491	3370	2315	3156	PF3D7_0521700	ATP-dependent RNA helicase DDX1, putative		8.06	4.08	6.45	1.63	1.83	3.19	3.32	8.0584	53.14	44.71	28.91	29.77	16.65	13.42	19.4	0	0	0	1
PGAL8A_00069100	1887	11.643	1296	0.686804	0.1316	0.3282	0.125	661	254	1571	PF3D7_0521800	AFG1-like ATPase, putative		4.98	0.71	5.82	2.93	8.13	9.65	5.13	9.653	41.18	18.73	26.95	39.45	51.17	25.41	23.06	0	0	0	1
PGAL8A_00069300	2139	60.545	918	0.429173	0.1167	0.0313	0.1262	846	2986	1550	PF3D7_0522100	conserved Plasmodium protein, unknown function		2.46	0.62	11.74	9.36	4.65	26.43	17.7	26.4334	16.64	16.95	41.65	61.61	37.22	52.36	41.74	0	0	0	1
PGAL8A_00069400	357	69.564	228	0.638655	0.0276	0.001	0.1921	3354	3526	753	PF3D7_0522200	transcription initiation factor TFIID subunit 10, putative		63.05	16.26	30.71	10.05	111.54	180.62	23.92	180.617	86.74	68.49	65.8	63.06	89.84	88.89	48.29	1	1	0	0
PGAL8A_00069500	822	135.548	636	0.773723	0.0223	0.001	0.0456	3563	3526	3250	PF3D7_0522300	18S rRNA (guanine-N(7))-methyltransferase, putative		59.85	97.46	48.68	12.11	40.66	27.38	8.48	97.4558	86.2	90.41	75.64	66.14	79.14	53.45	28.99	1	0	0	0
PGAL8A_00069600	24837	32.079	11076	0.445948	0.11	0.1219	0.1272	930	1297	1536	PF3D7_0522400	conserved Plasmodium protein, unknown function		2.9	0.55	13.21	10.42	5.17	31.2	10.67	31.1979	22.81	15.36	44.85	63.56	40	57.09	32.59	0	0	0	1
PGAL8A_00069700	501	26.347	432	0.862275	0.0733	0.1022	0.0843	1719	1549	2320	PF3D7_0522500	50S ribosomal protein L17, apicoplast, putative		3.33	3.01	62.25	23.47	142.46	94.42	58.65	142.457	28.07	39.69	80.32	77.19	91.4	80.09	68.74	1	1	0	0
PGAL8A_00069800	1386	52.63	987	0.712121	0.0226	0.001	0.0419	3552	3526	3336	PF3D7_0522600	inner membrane complex protein		4.17	7.54	40.07	77.53	6.51	12.82	30.83	77.526	35.61	54.96	71.59	89.67	46.1	31.9	54.13	1	0	0	0
PGAL8A_00069900	516	12.76	396	0.767442	0.0935	0.001	0.34	1215	3526	166	PF3D7_0522700	iron-sulfur assembly protein, putative		3.91	1.78	10.94	4.4	3.29	83.32	99.56	99.5638	33.41	31.65	39.78	47.1	28.44	78.15	79.3	0	0	0	1
PGAL8A_00070000	444	47.27	405	0.912162	0.0485	0.001	0.001	2545	3526	4217	PF3D7_0522800	pre-mRNA-splicing factor BUD31, putative		40.91	49.65	26.87	9.93	49.78	53.49	179.62	179.619	81.36	84.73	62.56	62.94	81.79	69.79	87.95	1	1	1	0
PGAL8A_00070100	4524	62.266	933	0.206233	0.103	0.1572	0.1958	1059	940	716	PF3D7_0522900	zinc finger protein, putative		4.66	1.41	3.51	0.63	3.26	27.69	349.56	349.558	39.07	28.23	20.27	18.95	28.15	53.85	94.34	0	0	1	0
PGAL8A_00070200	4131	107.346	2997	0.72549	0.0819	0.0154	0.0328	1476	3342	3599	PF3D7_0523000	multidrug resistance protein 1 // ABC transporter B family member 1	Pgh1	205.15	206.55	107.5	19.04	10.33	29.81	87.04	206.548	94.81	94.1	87.31	73.78	56.64	55.82	76.96	1	0	0	0
PGAL8A_00070300	1602	127.076	1404	0.876404	0.0183	0.0257	0.0236	3718	3120	3850	PF3D7_0523100	mitochondrial-processing peptidase subunit alpha, putative		27.06	43.28	77.57	29.85	11.03	7.73	13.95	77.5738	75	83.12	83.59	80.49	58.09	21.55	36.94	1	0	0	0
PGAL8A_00070400	2850	5.341	1416	0.496842	0.1692	0.5217	0.2923	347	96	257	PF3D7_0523200	conserved Plasmodium protein, unknown function		5.24	9.91	8.09	5.07	3.86	15.39	2.96	15.3937	42.63	59.6	33.15	49.43	32.79	37.16	18.33	0	0	0	1
PGAL8A_00070500	393	144.238	357	0.908397	0.0295	0.0832	0.0249	3283	1868	3818	PF3D7_0523300	conserved Plasmodium protein, unknown function		18.59	36.92	147.41	80.02	1226.74	275.02	89	1226.74	68.67	81.22	90.22	89.89	98.1	92.66	77.46	1	1	0	0
PGAL8A_00070600	1593	138.88	1269	0.79661	0.0316	0.0202	0.0205	3209	3257	3921	PF3D7_0523400	DnaJ protein, putative		9.9	25.54	59.89	18.9	6.32	18.39	172.93	172.927	57.47	76.15	79.68	73.6	45.32	42.25	87.52	0	0	1	0
PGAL8A_00070700	345	16.987	333	0.965217	0.1932	0.0575	0.1142	245	2384	1741	PF3D7_0523500	dynein light chain Tctex-type, putative		3.05	2.55	10.59	0	149.84	162.7	24.55	162.695	24.68	37.18	39.1	5.14	91.74	87.73	49	0	1	0	0
PGAL8A_00070800	624	39.131	618	0.990385	0.0249	0.0227	0.0349	3478	3197	3545	PF3D7_0523600	conserved Plasmodium protein, unknown function		4.01	6.73	70.29	70.18	132.18	34.49	22.42	132.176	34.26	52.92	82	88.92	90.86	59.62	46.66	1	1	0	0
PGAL8A_00070900	3843	13.874	1605	0.417642	0.1592	0.287	0.3192	401	334	197	PF3D7_0523700	conserved Plasmodium membrane protein, unknown function		2.87	2.14	2.02	0.87	1.97	14.72	5.4	14.7153	22.28	34.05	15.46	21.86	17.6	35.84	23.51	0	0	0	1
PGAL8A_00071000	1935	31.885	1293	0.668217	0.0686	0.1143	0.0967	1847	1393	2073	PF3D7_0523800	transporter, putative		20.37	2.82	15.74	4.72	6.85	28.16	15.66	28.1611	70.12	38.74	49.28	48.17	47.17	54.32	39.14	0	0	0	1
PGAL8A_00071100	597	16.45	294	0.492462	0.168	0.0886	0.3469	354	1773	155	PF3D7_0523900	conserved Plasmodium membrane protein, unknown function		33.26	13.47	27.7	24.49	84.63	76.66	66.3	84.6341	78.09	65.09	63.34	77.69	87.62	76.58	71.37	0	1	0	0
PGAL8A_00071200	3372	487.748	3030	0.898577	0.0083	0.009	0.0047	4046	3466	4189	PF3D7_0524000	karyopherin beta		296.6	159.64	245.7	58.05	3.85	13.63	76.76	296.602	96.26	93.2	93.42	87.4	32.73	33.75	74.47	1	0	0	0
PGAL8A_00071300	2814	10.391	1281	0.455224	0.1168	0.1424	0.2267	845	1073	523	PF3D7_0524100	conserved Plasmodium protein, unknown function		40.05	7.1	8.86	3.07	7.25	43.2	24.37	43.1955	81.03	53.83	34.91	40.28	48.76	65.43	48.81	1	0	0	0
PGAL8A_00071400	462	16.635	333	0.720779	0.3122	0.1526	0.2422	55	977	432	PF3D7_0524200	conserved Plasmodium membrane protein, unknown function		6.06	0.51	10.8	8.85	74.26	35.44	12.04	74.2596	46.72	14.06	39.43	60.67	86.52	60.18	34.5	0	1	0	0
PGAL8A_00071500	1302	65.24	624	0.479263	0.1371	0.1178	0.1744	603	1346	913	PF3D7_0524300	conserved Plasmodium protein, unknown function		21.89	14.68	20.35	3.85	5.13	18.5	10.31	21.8864	71.46	66.66	55.77	44.63	39.81	42.44	32.13	0	0	0	1
PGAL8A_00071600	1098	111.162	1011	0.920765	0.0012	0.001	0.0021	4220	3526	4208	PF3D7_0524400	ribosome-interacting GTPase 1, putative		40.5	90.48	90.98	28.91	15.62	16.42	33.13	90.9846	81.24	89.77	85.51	80.11	65.29	38.9	55.72	1	0	0	0
PGAL8A_00071700	369	16.031	195	0.528455	0.2116	0.0327	0.1368	190	2949	1368	PF3D7_0524500	conserved Plasmodium protein, unknown function		24.41	10.23	29.2	8.69	23.65	44.56	11.28	44.5596	73.31	60.22	64.64	60.28	71.54	65.97	33.5	0	0	0	1
PGAL8A_00071800	726	75.056	342	0.471074	0.2493	0.1556	0.1156	110	952	1722	PF3D7_0524600	50S ribosomal protein L12, apicoplast, putative		9.17	3.69	51.35	22.02	52.71	190.99	57.85	190.993	55.86	43.2	76.72	76.23	82.57	89.48	68.43	0	1	0	0
PGAL8A_00071900	318	28.769	144	0.45283	0.001	0.2464	0.0556	4222	439	3001	PF3D7_0524700	mitochondrial import receptor subunit TOM22, putative		74.52	113.7	77.12	15.71	495.9	128.94	79.2	495.905	88.14	91.26	83.49	70.57	96.31	84.89	75.11	1	1	0	0
PGAL8A_00072000	1944	7.139	1191	0.612654	0.0488	0.095	0.0761	2531	1660	2490	PF3D7_0524800	ubiquitin fusion degradation protein 1, putative		6.06	5.66	7.12	4.89	8.79	34.43	2.66	34.4326	46.63	50.08	30.73	48.8	52.97	59.55	17.55	0	0	0	1
PGAL8A_00072200	2592	16.716	1668	0.643519	0.0652	0.0506	0.0714	1961	2541	2601	PF3D7_0524900	S-adenosyl-L-methionine-dependent tRNA 4-demethylwyosine synthase, putative		71.21	55.32	26.71	2.77	13.53	22.97	20.28	71.2105	87.76	85.86	62.4	38.62	62.3	48.81	44.21	1	0	0	0
PGAL8A_00072300	1500	105.064	732	0.488	0.0337	0.0624	0.0478	3142	2291	3194	PF3D7_0525000	zinc finger protein, putative		21.22	246.16	52.18	5	12.79	20.9	198.46	246.158	70.92	94.76	77.06	49.32	61.19	45.87	89.01	1	0	1	0
PGAL8A_00072400	2022	307.123	1794	0.88724	0.1013	0.2065	0.0643	1087	598	2765	PF3D7_0525100	acyl-CoA synthetase	PfACS10	80.54	67.53	218.83	31.11	10.99	34.37	269.86	269.863	88.97	87.61	92.76	81.1	58.04	59.51	92.07	1	0	1	0
PGAL8A_00072500	4491	85.259	2220	0.494322	0.0548	0.0495	0.1021	2318	2563	1975	PF3D7_0525200	structural maintenance of chromosomes protein 6, putative		12.41	7.01	28.41	20.49	5.61	16.23	36.81	36.806	61.57	53.64	63.94	75.07	41.94	38.46	58.33	0	0	0	1
PGAL8A_00072600	1182	76.801	534	0.451777	0.1143	0.2865	0.0878	868	337	2239	PF3D7_0525300	conserved Plasmodium protein, unknown function		3.03	0.33	6.15	3.86	12.24	468.59	14.51	468.595	24.47	8.69	28.06	44.69	60.22	95.85	37.7	0	1	0	0
PGAL8A_00072700	1353	24.413	963	0.711752	0.0697	0.1127	0.0672	1816	1415	2697	PF3D7_0525400	G-protein coupled receptor, putative		4.91	0.79	20.87	11.93	27.88	73.67	20.93	73.6691	40.61	20.27	56.6	65.86	74.23	75.73	45.19	0	0	0	1
PGAL8A_00072800	4731	23.571	2349	0.496512	0.0729	0.123	0.1746	1726	1279	910	PF3D7_0525500	WD repeat-containing protein, putative		15.79	10.82	2.91	0.42	1.28	6.1	2	15.7926	65.66	61.26	18.63	15.92	12.5	18.4	16.12	0	0	0	1
PGAL8A_00072900	1053	12.14	729	0.692308	0.0626	0.1873	0.2818	2042	707	296	PF3D7_0525600	RNA methyltransferase, putative		4.15	12.61	46.91	17.81	35.82	28.64	27.82	46.912	35.43	63.77	74.9	72.76	77.67	54.79	51.84	0	0	0	1
PGAL8A_00073000	396	14.422	222	0.560606	0.076	0.0948	0.0416	1630	1663	3349	PF3D7_0525700	conserved Plasmodium protein, unknown function		5.01	6.41	102.45	53.44	209.39	35.25	211.99	211.99	41.38	52.02	86.79	86.79	93.42	60.03	89.64	1	1	1	0
PGAL8A_00073100	903	274.533	597	0.66113	0.0917	0.1207	0.1031	1252	1314	1954	PF3D7_0525800	inner membrane complex protein 1g, putative		8.79	2.28	234.57	117.17	7.67	15.24	672.45	672.452	54.98	35.36	93.11	92.04	50.09	36.89	97.73	1	0	1	0
PGAL8A_00073200	879	3.258	804	0.914676	0.1292	0.0366	0.1318	689	2847	1453	PF3D7_0525900	NIMA related kinase 2	PfNek-2	1.7	0.37	0.86	0	18.52	84.78	247	247.001	7.59	10.06	9.85	5.14	68.24	78.33	91.09	0	0	1	0
PGAL8A_00073300	1956	3.044	831	0.424847	0.1684	0.2042	0.3131	352	612	211	PF3D7_0526000	RAP protein, putative		3.45	7.3	9.11	1.82	7.22	46.37	6.36	46.3662	29.32	54.34	35.47	31.47	48.62	66.76	25.22	0	0	0	1
PGAL8A_00073400	1017	3.674	330	0.324484	0.1273	0.3101	0.3803	719	281	120	PF3D7_0526100	conserved Plasmodium membrane protein, unknown function		3.22	2	7.96	0.72	18.06	330.45	9.1	330.452	26.78	33.1	32.73	19.94	67.87	93.94	29.95	0	1	0	0
PGAL8A_00073600	969	40.777	786	0.811146	0.0838	0.0482	0.1064	1435	2585	1877	PF3D7_0526300	WD repeat-containing protein, putative		20.94	9.87	16.17	3.93	16.18	56.05	35.99	56.0478	70.59	59.55	50.06	45.09	65.85	70.64	57.8	0	0	0	1
PGAL8A_00073700	1053	12.289	675	0.641026	0.0613	0.089	0.0807	2089	1763	2392	PF3D7_0526400	conserved Plasmodium protein, unknown function		1.44	0.51	7.35	5.95	22.28	205.57	15.46	205.567	5.8	14.04	31.3	53.06	70.85	90.22	38.88	0	1	0	0
PGAL8A_00073800	3546	90.659	1776	0.500846	0.0446	0.0278	0.116	2696	3079	1717	PF3D7_0526500	conserved Plasmodium protein, unknown function		46.3	25.29	23.05	3.75	6.91	14.63	18.18	46.3026	83.05	76.03	58.99	44.09	47.45	35.54	42.22	1	0	0	0
PGAL8A_00074000	1761	47.275	717	0.407155	0.0157	0.0195	0.0844	3812	3271	2317	PF3D7_0526700	conserved protein, unknown function		11.92	10.84	30.98	8.73	3.54	16.66	24.58	30.9752	60.79	61.29	66.02	60.36	30.36	39.5	49.04	0	0	0	1
PGAL8A_00074100	852	22.418	312	0.366197	0.0358	0.001	0.15	3030	3526	1182	PF3D7_0526800	conserved Plasmodium protein, unknown function		216.7	113.31	125.78	19.38	49.77	44.13	31.6	216.697	94.98	91.22	88.89	74.14	81.77	65.85	54.72	1	1	0	0
PGAL8A_00074200	642	137.369	480	0.747664	0.0585	0.081	0.0855	2192	1904	2287	PF3D7_0526900	transmembrane emp24 domain-containing protein, putative		320.61	72.53	137.41	43.29	60.53	391.65	39.05	391.655	96.49	88.02	89.6	84.92	84.16	94.98	59.82	1	1	0	0
PGAL8A_00074300	2871	263.152	2364	0.823406	0.0105	0.0088	0.0132	3981	3469	4051	PF3D7_0527000	DNA replication licensing factor MCM3, putative	PfMCM3	29.95	32.99	909.24	763.42	36.81	51.07	151.58	909.244	76.68	79.42	97.75	98.2	78.03	68.67	85.72	1	0	1	0
PGAL8A_00074400	459	84.392	417	0.908497	0.0111	0.001	0.0081	3957	3526	4134	PF3D7_0527100	ubiquitin-conjugating enzyme E2 N, putative	PfUBC13	260.4	254.46	845.68	685.79	1315.81	186.9	76.21	1315.81	95.83	94.84	97.61	98.11	98.2	89.15	74.35	1	1	0	0
PGAL8A_00074500	1755	276.061	1236	0.704274	0.0417	0.1002	0.0548	2801	1584	3018	PF3D7_0527200	ubiquitin carboxyl-terminal hydrolase 14		45.36	54.78	115.38	78.41	7.5	12.58	60.03	115.379	82.81	85.74	88.07	89.75	49.47	31.49	69.25	1	0	0	0
PGAL8A_00074600	990	21.978	885	0.893939	0.0666	0.1473	0.0878	1907	1028	2239	PF3D7_0527300	methionine aminopeptidase 1a, putative		24.19	33.2	53.61	13.14	21.9	71.03	32.7	71.0278	73.15	79.57	77.55	67.65	70.61	75.09	55.46	0	0	0	1
PGAL8A_00074700	525	55.71	279	0.531429	0.1867	0.5667	0.2129	268	78	603	PF3D7_0527400	conserved Plasmodium protein, unknown function		83.43	27.63	13.72	2.78	29.99	73.62	29.15	83.4314	89.22	77.24	45.71	38.66	75.43	75.71	52.9	1	0	0	0
PGAL8A_00074800	1287	241.507	561	0.435897	0.0343	0.019	0.0764	3105	3284	2481	PF3D7_0527500	Hsc70-interacting protein	PfHIP	636.11	1523.86	1453.75	1941.26	268.82	76.59	229.63	1941.26	98.23	98.6	98.56	99.01	94.33	76.54	90.38	1	1	1	0
PGAL8A_00074900	1377	60.287	795	0.577342	0.4092	0.3146	0.4965	18	272	54	PF3D7_0527600	conserved Plasmodium protein, unknown function		6.41	16.63	60.27	22.13	13.75	61.15	76.71	76.7068	48.07	68.93	79.8	76.34	62.74	72.55	74.45	0	0	0	1
PGAL8A_00075200	1953	39.445	1485	0.760369	0.0091	0.0108	0.0171	4027	3428	3990	PF3D7_0527900	ATP-dependent RNA helicase DDX41, putative		84.48	47.7	50.21	5.44	7.05	6.11	34.31	84.4823	89.37	84.18	76.22	50.96	48.07	18.47	56.66	1	0	0	0
PGAL8A_00075300	375	69.036	372	0.992	0.093	0.3327	0.1135	1225	246	1751	PF3D7_0528000	proteasome maturation factor UMP1, putative		11.41	17.13	31.16	14.89	36.07	217.66	48.5	217.655	59.88	69.53	66.11	69.95	77.74	90.7	64.96	0	1	0	0
PGAL8A_00075400	2769	183.937	2193	0.791983	0.017	0.0046	0.0144	3768	3513	4032	PF3D7_0528100	AP-1 complex subunit beta, putative		68.66	61.9	102.17	55.41	10.09	16.64	44.63	102.17	87.4	86.78	86.76	87.1	56.05	39.45	63.06	1	0	0	0
PGAL8A_00075500	1548	142.252	1179	0.761628	0.0283	0.0413	0.0377	3331	2726	3461	PF3D7_0528200	eukaryotic translation initiation factor 3 subunit E, putative		87.59	74.85	83.3	13.24	24.27	67.81	17.11	87.5946	89.74	88.37	84.37	67.73	71.92	74.35	40.97	1	0	0	0
PGAL8A_00075600	1542	36.919	948	0.614786	0.1593	0.0718	0.2421	400	2092	433	PF3D7_0528300	conserved Plasmodium protein, unknown function		1.96	0.53	12.2	8.48	1.4	7.28	58.18	58.1799	10.22	14.77	42.69	59.62	13.43	20.6	68.58	0	0	0	1
PGAL8A_00075700	1209	61.39	597	0.493797	0.1051	0.082	0.0586	1025	1885	2926	PF3D7_0528400	palmitoyltransferase DHHC7		3.59	0.78	46.71	56.09	9.37	96.86	333.45	333.454	30.67	20.13	74.73	87.23	54.28	80.56	94.03	1	1	1	0
PGAL8A_00075800	909	22.414	861	0.947195	0.1208	0.1493	0.1487	800	1010	1201	PF3D7_0528500	F-actin-capping protein subunit alpha, putative		13.11	4.03	22.18	8.59	68.91	161.77	65.11	161.771	62.45	44.45	58.06	59.96	85.77	87.62	71.07	0	1	0	0
PGAL8A_00076000	609	24.956	513	0.842365	0.0244	0.034	0.0612	3495	2914	2846	PF3D7_0528700	peptidyl-prolyl cis-trans isomerase		101.33	85.09	161.1	31.06	931.08	503.28	125.13	931.084	91.03	89.35	90.88	81.03	97.73	96.04	82.93	1	1	1	0
PGAL8A_00076100	1449	14.131	765	0.52795	0.1178	0.0977	0.2242	838	1614	538	PF3D7_0528800	nucleolar preribosomal GTPase, putative		22.96	16.56	6.73	0.18	3.27	24.5	41.61	41.6099	72.17	68.79	29.62	11.96	28.3	50.51	61.5	0	0	0	1
PGAL8A_00076200	696	14.388	582	0.836207	0.0678	0.3085	0.1157	1873	284	1719	PF3D7_0528900	conserved Plasmodium protein, unknown function		17.32	2.77	1.92	0.43	85.48	1679.39	238.28	1679.39	67.44	38.41	15.08	16.06	87.64	98.62	90.7	0	1	1	0
PGAL8A_00076300	2118	11.551	1710	0.807365	0.0358	0.0033	0.0664	3030	3521	2721	PF3D7_0529000	conserved Plasmodium protein, unknown function		27.74	30.98	42.4	13.74	3.51	9.92	34.33	42.4026	75.49	78.73	72.89	68.55	30.12	25.95	56.69	0	0	0	1
PGAL8A_00076400	489	24.645	219	0.447853	0.0144	0.001	0.0319	3853	3526	3626	PF3D7_0529100	thioredoxin-like protein, putative		3.4	5.31	22.81	9.58	109.57	255.86	22.81	255.864	28.8	49.06	58.8	62.04	89.7	92.11	47.14	0	1	0	0
PGAL8A_00076600	837	15.573	534	0.637993	0.1187	0.1062	0.1935	824	1498	742	PF3D7_0529300	apicoplast TIC22 protein	PfTIC22	3.73	3.78	15.38	4.2	5.24	37.39	19.99	37.3898	32.14	43.65	48.73	46.36	40.36	61.49	43.87	0	0	0	1
PGAL8A_00076800	543	51.714	495	0.911602	0.0127	0.001	0.0395	3904	3526	3414	PF3D7_0529500	cell cycle regulator protein, putative		41.56	27.16	54.25	13.61	140.93	38.42	5.18	140.925	81.53	76.94	77.79	68.37	91.21	62.02	23.18	1	1	0	0
PGAL8A_00077000	2517	21.805	1809	0.718713	0.066	0.1219	0.1716	1937	1297	938	PF3D7_0529700	conserved Plasmodium protein, unknown function		1.27	1.12	3.42	0.89	1.75	9.2	1.89	9.1993	4.83	25.04	20.01	22.14	16.06	24.48	15.94	0	0	0	1
PGAL8A_00077100	5082	78.739	1695	0.33353	0.0359	0.0559	0.0756	3023	2421	2502	PF3D7_0529800	conserved Plasmodium protein, unknown function		3.01	2.56	17.82	7.96	6.02	16.71	45.73	45.7329	24.1	37.32	52.43	58.59	43.83	39.64	63.67	0	0	0	1
PGAL8A_00077200	771	44.811	681	0.883268	0.0135	0.0322	0.0192	3882	2960	3951	PF3D7_0529900	RING zinc finger protein, putative		126.49	73.36	161.41	154.35	187.66	219.95	76.91	219.95	92.66	88.13	90.89	93.44	93.02	90.77	74.52	1	1	0	0
PGAL8A_00414200	678	37.325	321	0.473451	0.032	0.001	0.0188	3200	3526	3957	PF3D7_0530100	SNARE protein, putative		16.32	7.48	30.22	5.2	9.41	51.33	109.37	109.372	66.34	54.86	65.5	49.93	54.49	68.72	81.01	0	0	1	0
PGAL8A_00414300	1542	43.158	1104	0.715953	0.0719	0.0788	0.1189	1755	1951	1670	PF3D7_0530200	phosphoenolpyruvate/phosphate translocator	iTPT	4.11	1.71	50.37	13.81	7.4	24.99	43.53	50.3672	35.05	31.16	76.29	68.6	49.21	51.03	62.49	0	0	0	1
PGAL8A_00414400	3402	6.026	1254	0.368607	0.1267	0.1484	0.1277	728	1016	1530	PF3D7_0530300	conserved Plasmodium membrane protein, unknown function		3.27	1.06	34.69	64.25	5.8	34.48	24.82	64.2528	27.25	24.11	68.5	88.28	42.86	59.58	49.28	1	0	0	0
PGAL8A_00414500	4353	2.953	2223	0.510682	0.1785	0.178	0.2989	298	774	241	PF3D7_0530400	conserved Plasmodium protein, unknown function		1.97	3.11	4.64	0.88	10.95	28.69	2.35	28.6918	10.33	40.12	23.44	21.95	57.94	54.87	16.81	0	0	0	1
PGAL8A_00414600	2844	0.293	1386	0.487342	0.1242	0.146	0.2115	765	1037	610	PF3D7_0530500	conserved Plasmodium membrane protein, unknown function		1.93	0.18	0.49	0.19	3.96	11.04	4.16	11.0373	9.9	4.54	7.43	12.11	33.32	28.2	21.14	0	0	0	1
PGAL8A_00414700	1164	23.768	633	0.543814	0.0114	0.001	0.0597	3946	3526	2893	PF3D7_0530600	XAP-5 DNA binding protein, putative		24.7	10.03	8.88	1.53	27.66	103.14	36.44	103.139	73.58	59.86	34.93	29.12	74.12	81.53	58.18	0	1	0	0
PGAL8A_00414800	2817	9.288	1497	0.531416	0.1413	0.2214	0.1531	557	531	1138	PF3D7_0530700	conserved Plasmodium protein, unknown function		20.74	25.75	15.69	0.99	16.87	43.61	4.3	43.6096	70.4	76.23	49.21	23.28	66.64	65.59	21.38	0	0	0	1
PGAL8A_00414900	753	15.211	603	0.800797	0.1006	0.0401	0.1402	1094	2756	1317	PF3D7_0530800	CPW-WPC family protein		7.91	3.63	41.74	17.29	481.43	1174.01	276.17	1174.01	52.67	42.82	72.6	72.22	96.23	98.13	92.38	0	1	1	0
PGAL8A_00415000	7734	72.367	3849	0.497673	0.0715	0.0905	0.1209	1769	1741	1639	PF3D7_0530900	formin 1		2.96	0.46	14.37	30.83	3.23	16.19	24.4	30.8262	23.57	12.86	46.74	80.94	28.01	38.39	48.85	1	0	0	0
PGAL8A_00415100	2001	43.779	987	0.493253	0.1107	0.2028	0.1671	919	620	988	PF3D7_0531000	SURF1 domain-containing protein, putative		4.66	2.75	11.13	4.28	3.3	13.52	11.82	13.5165	39.03	38.32	40.28	46.63	28.51	33.51	34.22	0	0	0	1
PGAL8A_00415200	8298	33.75	2058	0.248012	0.3049	0.2905	0.4255	60	328	81	PF3D7_0531100	conserved Plasmodium protein, unknown function		2.2	0.27	4.8	6.57	1.41	26.98	6.74	26.9847	13.15	6.85	23.84	54.77	13.47	53	25.95	0	0	0	1
PGAL8A_00415300	642	48.093	561	0.873832	0.0191	0.0858	0.043	3688	1822	3316	PF3D7_0531200	ribosomal protein S16, mitochondrial, putative		1.79	1.73	4.87	1.37	26.72	116.72	4.36	116.717	8.52	31.28	24.11	27.51	73.62	83.54	21.5	0	1	0	0
PGAL8A_00415400	996	22.644	339	0.340361	0.1957	0.001	0.4485	235	3526	72	PF3D7_0531300	conserved Plasmodium protein, unknown function		2.23	0.45	10.66	6.95	15.23	80.34	4.73	80.3439	13.59	12.55	39.14	55.88	64.84	77.48	22.4	0	0	0	1
PGAL8A_00415500	3090	11.087	1443	0.46699	0.1666	0.2424	0.3513	361	448	148	PF3D7_0531400	conserved Plasmodium protein, unknown function		8.19	5.66	4.59	1.09	2.35	15.8	1.59	15.7977	53.54	50.11	23.3	24.16	20.79	37.7	15.13	0	0	0	1
PGAL8A_00130500	3888	54.96	1140	0.29321	0.0257	0.0448	0.0978	3447	2651	2048	PF3D7_0602000	conserved Plasmodium protein, unknown function		3.75	1.69	9.29	1.36	5.25	55.93	61.3	61.2972	32.28	31.02	36.02	27.37	40.44	70.61	69.76	0	0	0	1
PGAL8A_00130600	3876	57.624	2877	0.74226	0.0248	0.0278	0.0559	3481	3079	2989	PF3D7_0602100	ATP-dependent RNA helicase, putative		22.64	20.97	13.89	0.73	3.47	18.58	52.82	52.817	72.06	73	46.06	20.06	29.88	42.6	66.45	0	0	0	1
PGAL8A_00130700	765	177.463	669	0.87451	0.0312	0.038	0.0305	3223	2809	3659	PF3D7_0602200	MYND-type zinc finger protein, putative		18.43	57.67	36.86	5.42	16.52	20.18	12.9	57.6661	68.53	86.27	69.79	50.89	66.19	44.94	35.68	1	0	0	0
PGAL8A_00130800	906	57.531	696	0.768212	0.1037	0.1017	0.2111	1046	1558	615	PF3D7_0602300	liver merozoite formation protein, putative		1.66	0.76	1.39	0.62	6.63	45.75	1.48	45.75	7.28	19.67	12.9	18.83	46.46	66.47	14.94	0	0	0	1
PGAL8A_00130900	2844	49.517	2088	0.734177	0.033	0.0078	0.058	3167	3489	2936	PF3D7_0602400	elongation factor G		13.87	53.4	75.89	24.96	12.08	5.1	10.94	75.8865	63.46	85.53	83.17	77.88	60	16.69	32.98	1	0	0	0
PGAL8A_00131000	1083	32.955	921	0.850416	0.0338	0.0289	0.1343	3134	3062	1413	PF3D7_0602500	geranylgeranyltransferase, putative		9.71	26.92	17.18	4.64	9.36	2.81	3.68	26.9172	57.05	76.8	51.57	47.78	54.25	12.83	20.15	0	0	0	1
PGAL8A_00131100	4233	59.191	1506	0.355776	0.0481	0.1211	0.0523	2568	1309	3089	PF3D7_0602600	conserved Plasmodium protein, unknown function		39.94	14.34	13.72	3.09	4.77	18.35	6.83	39.943	80.98	66.25	45.71	40.4	37.87	42.18	26.14	1	0	0	0
PGAL8A_00131200	1581	15.609	549	0.347249	0.1923	0.0953	0.2905	247	1652	266	PF3D7_0602700	conserved Plasmodium protein, unknown function		11.18	0.68	2.35	0.42	8.16	121.08	32.96	121.084	59.49	18.21	16.7	15.89	51.27	84.13	55.58	0	1	0	0
PGAL8A_00131300	2079	30.474	783	0.376623	0.0779	0.1208	0.1154	1575	1312	1726	PF3D7_0602800	JmjC domain-containing protein, putative	PfJmjC2	13.23	1.67	2.08	0.76	3.74	20.93	2.88	20.9255	62.66	30.85	15.73	20.41	31.83	45.99	18.18	0	0	0	1
PGAL8A_00131400	1239	31.612	348	0.280872	0.0568	0.1855	0.2233	2256	723	540	PF3D7_0602900	conserved Plasmodium protein, unknown function		13.15	4.94	21.78	16.02	5.45	52.96	36.64	52.9619	62.56	47.9	57.63	71.04	41.22	69.6	58.28	0	0	0	1
PGAL8A_00131500	1266	52.953	540	0.42654	0.0729	0.0112	0.1849	1726	3421	822	PF3D7_0603000	conserved Plasmodium protein, unknown function		26.52	13.33	23.5	16.19	16.32	84.24	8.65	84.2407	74.62	64.79	59.39	71.18	65.95	78.26	29.22	0	0	0	1
PGAL8A_00131600	1185	6.984	609	0.513924	0.0128	0.1906	0.0315	3899	688	3636	PF3D7_0603100	RNA-binding protein, putative		1.84	0.76	15.2	4.11	5.02	52.28	11.32	52.2845	9.07	19.79	48.5	45.87	39.21	69.33	33.56	0	0	0	1
PGAL8A_00131700	1407	19.719	1176	0.835821	0.0246	0.016	0.0355	3488	3335	3523	PF3D7_0603200	mitochondrial chaperone BCS1, putative		3.61	3.08	31.85	4.15	7.38	10.75	9.88	31.847	30.98	39.99	66.54	46.06	49.13	27.57	31.33	0	0	0	1
PGAL8A_00131800	1632	32.743	1173	0.71875	0.0328	0.0887	0.0951	3172	1769	2099	PF3D7_0603300	dihydroorotate dehydrogenase	PfDHODH	11.9	30.6	18.62	2.41	1.03	2.61	9.82	30.6035	60.77	78.54	53.62	35.97	10.78	12.34	31.19	0	0	0	1
PGAL8A_00131900	3087	93.732	1242	0.402332	0.0739	0.1346	0.0821	1696	1151	2371	PF3D7_0603400	trophozoite exported protein 1		14.91	30.5	24.32	3.11	4.88	19.08	40.98	40.977	64.7	78.5	60.22	40.47	38.46	43.53	60.97	0	0	0	1
PGAL8A_00132000	1323	5.833	903	0.68254	0.0243	0.0103	0.0299	3500	3442	3672	PF3D7_0603500	cation/H+ antiporter	CHA	5.27	1.73	69.2	26.82	26.04	31.07	13.72	69.1963	42.89	31.35	81.82	79	73.15	57.04	36.63	1	0	0	0
PGAL8A_00132100	7092	49.843	1599	0.225465	0.0945	0.1668	0.1136	1200	856	1750	PF3D7_0603600	conserved Plasmodium protein, unknown function		2.51	0.5	4.48	0.29	4.7	35.84	14.17	35.8449	17.33	13.78	22.95	13.88	37.48	60.59	37.23	0	0	0	1
PGAL8A_00132200	1344	60.509	1053	0.783482	0.0302	0.0377	0.098	3249	2817	2044	PF3D7_0603700	phenylalanine--tRNA ligase		2.12	0.65	7.35	1.32	2.89	13.32	2.1	13.3178	12.05	17.52	31.31	26.96	25.48	33.04	16.37	0	0	0	1
PGAL8A_00132300	5826	43.675	3627	0.622554	0.0431	0.0803	0.0871	2746	1928	2257	PF3D7_0603800	centrosomal protein CEP76, putative		2.7	1.26	36.21	45.79	11.36	11.55	20.93	45.7945	20.15	26.6	69.38	85.41	58.72	29.25	45.21	1	0	0	0
PGAL8A_00132400	1095	10.41	579	0.528767	0.0617	0.1575	0.0437	2068	936	3302	PF3D7_0603900	conserved Plasmodium protein, unknown function		2.59	0.07	2.41	0.26	11.21	64.8	34.73	64.7963	18.44	2.66	16.91	13.2	58.39	73.71	57	0	0	0	1
PGAL8A_00132500	4839	33.298	2160	0.446373	0.0665	0.1138	0.1359	1910	1401	1387	PF3D7_0604000	conserved Plasmodium protein, unknown function		1.99	1.43	1.83	0.39	2.04	8.29	2.78	8.2909	10.59	28.52	14.68	15.53	18.14	22.66	17.93	0	0	0	1
PGAL8A_00132600	5820	224.199	1188	0.204124	0.0414	0.0456	0.1759	2813	2631	900	PF3D7_0604100	AP2 domain transcription factor // SPE2-interacting protein	ApiAP2	3.67	0.72	52.41	41.76	14.01	6.32	22.14	52.4084	31.58	19.05	77.19	84.65	63.01	18.87	46.41	1	0	0	0
PGAL8A_00132700	282	18.008	216	0.765957	0.1025	0.001	0.0438	1070	3526	3300	PF3D7_0604200	mitochondrial ribosomal protein L41, putative		2.22	14.34	31.22	10.42	39	5.16	9.92	38.9966	13.4	66.26	66.21	63.59	78.83	16.81	31.39	0	0	0	1
PGAL8A_00132800	1863	45.822	876	0.470209	0.0195	0.0693	0.1354	3675	2149	1395	PF3D7_0604300	conserved Plasmodium protein, unknown function		6.61	11.34	28.14	8.48	16.95	76.1	8.44	76.1049	48.85	62.04	63.68	59.65	66.71	76.44	28.93	0	0	0	1
PGAL8A_00132900	564	7.197	219	0.388298	0.1263	0.5873	0.0492	736	71	3154	PF3D7_0604400	conserved Plasmodium protein, unknown function		2.33	0.59	0.46	0	76.59	2804.31	80.77	2804.31	14.93	16.27	7.03	5.14	86.81	99.05	75.44	0	1	0	0
PGAL8A_00133000	7125	92.839	1179	0.165474	0.0745	0.1771	0.0794	1676	781	2426	PF3D7_0604500	conserved Plasmodium protein, unknown function		117.85	70.66	62	20.38	7.65	42.23	63.43	117.847	92.25	87.9	80.2	74.97	50.01	64.79	70.52	1	0	0	0
PGAL8A_00133200	915	32.609	612	0.668852	0.098	0.001	0.0977	1141	3526	2049	PF3D7_0604700	glyoxalase I		6.21	7.38	122.01	39.76	66.65	42.38	39.37	122.011	47.14	54.56	88.58	83.92	85.34	64.9	60.01	1	1	0	0
PGAL8A_00133400	282	13.864	198	0.702128	0.0324	0.001	0.0595	3189	3526	2900	PF3D7_0604900	conserved Plasmodium protein, unknown function		3.26	4.41	14	4.08	71.4	76.74	471.24	471.236	27.12	46.02	46.24	45.7	86.19	76.67	96.4	0	1	1	0
PGAL8A_00133500	585	35.648	402	0.687179	0.0176	0.1644	0.0666	3746	875	2713	PF3D7_0605000	50S ribosomal protein L24, putative		3.75	2.44	5.91	1	10.72	12.26	408.98	408.978	32.23	36.52	27.35	23.47	57.47	30.83	95.45	0	0	1	0
PGAL8A_00133600	2049	31.999	1317	0.642753	0.0137	0.0072	0.0298	3874	3497	3676	PF3D7_0605100	RNA-binding protein, putative		88.83	57.27	67.81	95.51	10.23	25.99	136.34	136.335	89.86	86.24	81.62	91	56.4	51.96	84.09	1	0	1	0
PGAL8A_00133700	636	67.842	624	0.981132	0.0367	0.0476	0.0826	2992	2594	2360	PF3D7_0605200	conserved Plasmodium protein, unknown function		11.27	1.38	74.19	21.46	121.14	60.32	26.65	121.142	59.63	27.9	82.93	75.85	90.29	72.22	50.95	1	1	0	0
PGAL8A_00133800	1062	55.465	1059	0.997175	0.0122	0.001	0.0117	3923	3526	4077	PF3D7_0605300	serine/threonine protein kinase // aurora-related kinase 1	Pfark-1	6	1.34	81.9	34.32	137.2	163.57	90.9	163.569	46.27	27.5	84.23	82.21	91.03	87.81	77.84	1	1	0	0
PGAL8A_00133900	477	26.469	342	0.716981	0.1206	0.2068	0.0765	803	595	2478	PF3D7_0605400	calcium-binding protein, putative		2.81	0.66	8.01	3.65	7.97	24.49	17.38	24.485	21.46	17.62	32.94	43.5	50.73	50.48	41.27	0	0	0	1
PGAL8A_00134000	1386	27.209	861	0.621212	0.0894	0.0214	0.0456	1305	3225	3250	PF3D7_0605500	cyclin dependent kinase binding protein, putative		3.61	0.52	16.92	9.02	4.76	22.53	14.57	22.5335	30.92	14.38	51.25	61.03	37.84	48.23	37.86	0	0	0	1
PGAL8A_00134100	4935	5.212	2472	0.500912	0.1036	0.275	0.2647	1048	361	348	PF3D7_0605600	nucleoside diphosphate kinase, putative		2.93	0.42	1.02	0.27	3.25	14.43	395.49	395.49	23.11	11.74	10.94	13.45	28.09	35.23	95.22	0	0	1	0
PGAL8A_00134200	765	30.386	516	0.67451	0.1259	0.1506	0.1314	742	995	1460	PF3D7_0605700	conserved Plasmodium protein, unknown function		4.4	0.56	3.37	2.06	6.3	38.32	351.83	351.829	37.36	15.41	19.82	33.6	45.25	61.94	94.39	0	0	1	0
PGAL8A_00134300	5406	32.839	2403	0.444506	0.1226	0.1004	0.1835	785	1581	837	PF3D7_0605800	DNA repair protein RAD50, putative		11.7	7.3	20.45	6.92	2.92	8.77	18.14	20.4531	60.39	54.32	56.08	55.72	25.72	23.78	42.18	0	0	0	1
PGAL8A_00134400	885	70.514	579	0.654237	0.1218	0.0238	0.0675	792	3167	2683	PF3D7_0605900	long chain polyunsaturated fatty acid elongation enzyme, putative		176.11	8.81	202.83	71.64	123.94	131.01	199.88	202.835	94.15	57.43	92.3	89.09	90.43	85.17	89.1	1	1	1	0
PGAL8A_00134500	2847	60.594	990	0.347734	0.0868	0.068	0.1058	1373	2179	1891	PF3D7_0606000	conserved Plasmodium protein, unknown function		146.48	47.05	47.49	22.65	11.61	22.2	39.89	146.477	93.53	84.06	75.06	76.65	59.29	47.84	60.32	1	0	0	0
PGAL8A_00134600	1515	268.249	597	0.394059	0.0231	0.2063	0.0661	3537	601	2731	PF3D7_0606100	RNA-binding protein, putative		87.44	70.59	67.66	9.75	24.9	23.67	96.8	96.7954	89.68	87.87	81.58	62.49	72.38	49.7	78.78	1	0	0	0
PGAL8A_00134700	459	17.584	447	0.973856	0.0178	0.2056	0.034	3735	603	3563	PF3D7_0606200	ubiquitin-conjugating enzyme E2, putative		61.34	33.55	137.15	110.53	608.83	339.9	62.78	608.832	86.45	79.76	89.57	91.66	96.85	94.11	70.26	1	1	0	0
PGAL8A_00134900	375	6.167	201	0.536	0.1203	0.0932	0.2904	807	1688	267	PF3D7_0606400	conserved Plasmodium protein, unknown function		5.8	1.89	1.31	0.78	34.62	594.44	281.31	594.443	45.34	32.42	12.41	20.65	77.22	96.54	92.68	0	1	1	0
PGAL8A_00135000	1917	90.717	1206	0.629108	0.0214	0.0474	0.0635	3597	2597	2793	PF3D7_0606500	polypyrimidine tract-binding protein, putative		60.26	15.88	34.99	7.38	6.29	15.52	18.96	60.2642	86.29	68.05	68.62	57.3	45.18	37.32	42.86	1	0	0	0
PGAL8A_00135100	5340	72.542	2586	0.48427	0.0709	0.1497	0.1021	1792	1008	1975	PF3D7_0606600	conserved Plasmodium protein, unknown function		68.84	39.05	24.4	5.07	6.24	28.16	103.9	103.897	87.45	81.86	60.29	49.46	44.8	54.35	79.92	1	0	0	0
PGAL8A_00135200	4041	107.652	3123	0.772829	0.0314	0.041	0.0395	3215	2733	3414	PF3D7_0606700	coatomer alpha subunit, putative		69.2	33.23	87.13	62.94	15.05	26.85	44.39	87.1315	87.48	79.59	84.94	88.11	64.6	52.8	62.94	1	0	0	0
PGAL8A_00135400	630	71.872	468	0.742857	0.0437	0.0684	0.1063	2722	2167	1883	PF3D7_0606900	glutaredoxin-like protein	PfGLP2	13.92	21.14	10.97	1.34	29.16	147.31	33.92	147.315	63.53	73.1	39.9	27.08	74.97	86.64	56.41	0	1	0	0
PGAL8A_00135500	2808	94.168	1770	0.630342	0.0099	0.001	0.0145	4003	3526	4029	PF3D7_0607000	translation initiation factor IF-2, putative		174.26	276.03	142.03	55	14.81	15.03	148.78	276.032	94.1	95.07	89.87	86.97	64.15	36.47	85.49	1	0	1	0
PGAL8A_00135600	1473	24.908	981	0.665988	0.0525	0.0367	0.0973	2385	2844	2062	PF3D7_0607100	MYND-type zinc finger protein, putative		3.68	0.5	1.68	0.21	8.37	28.15	18.73	28.1451	31.68	13.81	14.19	12.3	51.86	54.3	42.72	0	0	0	1
PGAL8A_00135700	1086	9.699	621	0.571823	0.0472	0.0348	0.1234	2606	2886	1601	PF3D7_0607200	RING zinc finger protein, putative		3.97	0.55	22.71	2.73	12.87	91.3	17.35	91.3009	33.96	15.34	58.75	38.34	61.33	79.44	41.22	0	0	0	1
PGAL8A_00135800	1239	17.669	981	0.791768	0.0499	0.1233	0.1051	2482	1273	1909	PF3D7_0607300	uroporphyrinogen III decarboxylase	PfUROD	2.61	0.26	5.7	1.18	12.66	68.84	11.27	68.8391	18.64	6.35	26.5	25.2	60.98	74.61	33.48	0	0	0	1
PGAL8A_00135900	1902	28.711	1191	0.626183	0.0427	0.0204	0.0279	2762	3255	3726	PF3D7_0607400	G-protein associated signal transduction protein, putative		11.09	6.63	26.05	13.13	26.37	33.13	22.07	33.1277	59.3	52.62	61.68	67.6	73.36	58.63	46.29	0	0	0	1
PGAL8A_00136000	1374	14.771	498	0.362445	0.0894	0.0938	0.1423	1305	1679	1288	PF3D7_0607500	4-hydroxybenzoate polyprenyltransferase, putative // para-hydroxybenzoate--polyprenyltransferase, putative		4.33	4.81	14.92	6.94	9.9	31.2	8.93	31.198	36.89	47.46	48.09	55.82	55.62	57.11	29.65	0	0	0	1
PGAL8A_00136100	2379	183.752	1017	0.427491	0.0275	0.0813	0.059	3359	1897	2914	PF3D7_0607600	spindle assembly abnormal protein 6, putative		3.47	0.64	71.09	55.24	10.08	8.1	28.68	71.0896	29.63	17.33	82.27	87	55.98	22.31	52.52	1	0	0	0
PGAL8A_00136200	8997	124.782	1773	0.197066	0.078	0.1127	0.1137	1570	1415	1749	PF3D7_0607700	conserved Plasmodium protein, unknown function		2.52	0.33	28.18	25.59	7.66	281.07	59.29	281.068	17.43	8.62	63.74	78.35	50.03	92.85	68.95	0	1	0	0
PGAL8A_00136300	1665	24.191	822	0.493694	0.0994	0.0608	0.1951	1116	2317	729	PF3D7_0607800	GTP-binding protein, putative		2.63	1.45	4.67	1.16	3.58	8.62	118.84	118.84	19.01	28.72	23.51	24.94	30.74	23.41	82.34	0	0	1	0
PGAL8A_00136400	2322	54.394	963	0.414729	0.038	0.0751	0.1787	2944	2024	881	PF3D7_0607900	conserved Plasmodium protein, unknown function		2.66	3.27	14.67	2.04	3.86	29.73	199.72	199.722	19.34	41.18	47.43	33.38	32.82	55.65	89.08	0	0	1	0
PGAL8A_00136500	1026	15.304	744	0.725146	0.0917	0.0424	0.2104	1252	2702	621	PF3D7_0608000	diphthine methyltransferase, putative		24.04	25.82	35.28	12.74	55.83	58.74	97.05	97.0497	73	76.32	68.74	66.92	83.31	71.65	78.85	0	1	0	0
PGAL8A_00136600	3786	42.858	924	0.244057	0.0996	0.001	0.1356	1112	3526	1392	PF3D7_0608100	conserved Plasmodium protein, unknown function		17.41	16.2	31.58	6.96	5.76	20.42	96.59	96.5892	67.56	68.32	66.35	55.91	42.65	45.2	78.76	0	0	0	1
PGAL8A_00136700	456	5.486	399	0.875	0.0651	0.1149	0.1386	1963	1384	1349	PF3D7_0608200	conserved Plasmodium protein, unknown function		2.66	4.88	9.26	3.12	3.27	7.61	71.29	71.2934	19.39	47.67	35.95	40.54	28.25	21.24	73.1	0	0	0	1
PGAL8A_00136800	3276	13.435	1191	0.363553	0.0745	0.1707	0.0721	1676	828	2591	PF3D7_0608300	conserved Plasmodium protein, unknown function		2.33	4.36	4.67	1.37	2.74	20.22	8.79	20.2177	14.93	45.84	23.52	27.44	24.25	44.97	29.46	0	0	0	1
PGAL8A_00136900	1353	3.064	927	0.685144	0.0462	0.0763	0.1338	2645	2003	1419	PF3D7_0608310	sorting assembly machinery 50 kDa subunit, putative	TOB55	9.81	6.35	8.34	0.86	9.53	25.2	30.82	30.8179	57.3	51.81	33.63	21.78	54.77	51.17	54.08	0	0	0	1
PGAL8A_00137000	306	20.72	225	0.735294	0.0666	0	0.2602	1907	4212	366	PF3D7_0608400	conserved Plasmodium protein, unknown function		12.03	3.95	37.68	1.83	116.14	473.81	222.29	473.812	60.98	44.21	70.38	31.57	90.06	95.88	90.12	0	1	1	0
PGAL8A_00137100	708	999.296	657	0.927966	0.0101	0.001	0.0131	3995	3526	4053	PF3D7_0608500	proteasome subunit alpha type-2, putative		36.12	46.7	188.64	67.25	31.53	27.52	106.71	188.641	79.44	83.95	91.9	88.66	76.03	53.7	80.51	1	0	1	0
PGAL8A_00137200	1122	175.278	300	0.26738	0.0238	0.0722	0.5648	3511	2083	38	PF3D7_0608600	conserved Plasmodium protein, unknown function		3.92	6.14	10.82	1.38	29.56	398.67	147.8	398.67	33.56	51.39	39.45	27.64	75.28	95.05	85.36	0	1	1	0
PGAL8A_00137300	1632	324.332	1491	0.913603	0.0079	0.0118	0.0208	4056	3407	3914	PF3D7_0608700	T-complex protein 1 subunit zeta	TRiCzeta	82.13	111.7	124.5	32.6	16.51	12.77	169.75	169.748	89.08	91.15	88.82	81.69	66.16	31.78	87.35	1	0	1	0
PGAL8A_00137400	1245	35.39	1170	0.939759	0.0766	0.2375	0.0404	1608	464	3390	PF3D7_0608800	ornithine aminotransferase		127.03	2248.04	2889.1	413.6	320.02	361.04	505.71	2889.1	92.73	99.13	99.22	97.18	94.96	94.58	96.69	1	1	1	0
PGAL8A_00137500	2544	28.253	903	0.354953	0.2192	0.185	0.3593	168	731	136	PF3D7_0608900	conserved Plasmodium protein, unknown function		2.83	3.13	11.54	7.48	5.63	16.9	6.09	16.9022	21.76	40.21	40.99	57.47	42.05	40.06	24.72	0	0	0	1
PGAL8A_00137600	16026	129.033	6495	0.405279	0.0362	0.0434	0.0418	3012	2679	3341	PF3D7_0609000	conserved Plasmodium protein, unknown function		42.53	64.33	52.6	28.37	14.29	40.29	21.25	64.332	81.91	87.17	77.25	79.87	63.44	63.34	45.56	1	0	0	0
PGAL8A_00137700	1008	38.469	681	0.675595	0.0367	0.0558	0.0479	2992	2423	3188	PF3D7_0609100	zinc transporter ZIP1, putative		143.45	69.72	70.68	24.02	117.12	281.27	252.03	281.27	93.42	87.76	82.14	77.43	90.17	92.9	91.34	1	1	1	0
PGAL8A_00137800	1287	7.115	537	0.417249	0.1424	0.1564	0.1955	545	947	725	PF3D7_0609200	citrate synthase-like protein, putative		10.01	6.81	4.3	3.15	8.65	23.3	11.01	23.2981	57.68	53.07	22.47	40.8	52.69	49.35	33.13	0	0	0	1
PGAL8A_00137900	2958	38.064	432	0.146045	0.0643	0.122	0.2393	1984	1296	445	PF3D7_0609300	conserved Plasmodium protein, unknown function		2.78	2.19	12.13	1.49	3.15	45.3	114.23	114.234	21.12	34.52	42.58	28.53	27.4	66.18	81.63	0	0	1	0
PGAL8A_00138000	1602	22.372	1065	0.664794	0.0497	0.0317	0.0464	2490	2970	3227	PF3D7_0609400	mitochondrial cardiolipin synthase, putative		5.36	11.11	6.95	2.43	5.4	34.29	10.04	34.2916	43.41	61.74	30.38	36.2	41.08	59.46	31.61	0	0	0	1
PGAL8A_00138100	3201	9.889	2592	0.809747	0.1029	0.2812	0.1222	1063	350	1622	PF3D7_0609500	conserved Plasmodium protein, unknown function		2.67	0.35	1.62	1.38	2.81	12.16	1.75	12.1624	19.61	9.24	13.9	27.56	24.84	30.64	15.56	0	0	0	1
PGAL8A_00138300	8856	33.963	1632	0.184282	0.0981	0.1094	0.1249	1138	1451	1576	PF3D7_0609600	conserved Plasmodium protein, unknown function		2.52	0.17	1.79	0.31	1.49	16.28	87.49	87.4921	17.5	4.28	14.59	14.16	13.94	38.55	77.08	0	0	0	1
PGAL8A_00138400	855	39.415	735	0.859649	0.0215	0.0314	0.0281	3590	2982	3717	PF3D7_0609800	palmitoyltransferase DHHC2, putative		19.9	4.54	178.83	604.32	52.09	62.47	137.46	604.322	69.76	46.53	91.6	97.85	82.38	73.08	84.23	1	1	1	0
PGAL8A_00138500	5187	34.049	2091	0.403123	0.0405	0.0887	0.0891	2856	1769	2215	PF3D7_0609900	conserved Plasmodium protein, unknown function		21.23	7.31	20.27	32.28	9.43	11.67	4.62	32.2845	70.94	54.37	55.76	81.55	54.53	29.56	22.02	1	0	0	0
PGAL8A_00138600	951	156.585	756	0.794953	0.0077	0.001	0.0419	4064	3526	3336	PF3D7_0610000	mitochondrial ribosomal protein L19 precursor, putative		4.65	2.27	31.19	9.36	15.41	31.59	43.07	43.0731	39.02	35.24	66.18	61.59	65.05	57.5	62.25	0	0	0	1
PGAL8A_00138700	1296	70.986	699	0.539352	0.0195	0.0413	0.0558	3675	2726	2992	PF3D7_0610100	pre-mRNA-splicing factor SLU7, putative		44.96	45.97	43.77	22.68	15.57	24.32	79.65	79.651	82.71	83.73	73.52	76.67	65.19	50.35	75.21	1	0	0	0
PGAL8A_00138800	2475	177.178	561	0.226667	0.0382	0.3308	0.1018	2936	250	1980	PF3D7_0610200	RNA-binding protein 25, putative		29.62	16.69	12.1	2.85	3.32	14.96	27.18	29.6182	76.58	69.05	42.46	39.03	28.65	36.3	51.41	0	0	0	1
PGAL8A_00138900	411	180.967	405	0.985401	0.001	0.001	0.0222	4222	3526	3876	PF3D7_0610400	histone H3	H3.1	274.81	687.38	33526.8	36591.6	29152.1	4818.54	8755.65	36591.6	95.98	97.13	99.88	99.86	99.86	99.41	99.9	1	1	1	0
PGAL8A_00139000	372	29.33	330	0.887097	0.065	0.001	0.0469	1966	3526	3212	PF3D7_0610500	peptidyl-tRNA hydrolase PTRHD1, putative		16.84	22.38	21.9	25.28	15.67	21.37	30.09	30.0888	66.96	74.19	57.76	78.16	65.33	46.82	53.62	0	0	0	1
PGAL8A_00139300	2010	220.867	1824	0.907463	0.0339	0.0309	0.0597	3128	2999	2893	PF3D7_0610800	transketolase	PfTK	172.38	142.52	182.47	34.65	13.67	9.7	25.64	182.475	94.08	92.63	91.66	82.34	62.63	25.5	50.08	1	0	0	0
PGAL8A_00139400	3597	111.657	2037	0.566305	0.0372	0.0229	0.0486	2971	3193	3168	PF3D7_0610900	transcription elongation factor SPT5, putative		80.7	84.49	38.31	8.34	30.05	32.16	70.27	84.4904	88.99	89.29	70.75	59.23	75.52	57.88	72.88	1	0	0	0
PGAL8A_00139500	852	32.156	534	0.626761	0.0855	0.001	0.1938	1398	3526	737	PF3D7_0611000	SNARE associated Golgi protein, putative		2.9	0.18	10.67	5.1	18.33	325.59	17.81	325.591	22.68	4.56	39.18	49.52	68.06	93.8	41.87	0	1	0	0
PGAL8A_00139600	252	11.175	165	0.654762	0.001	0.001	0.001	4222	3526	4217	PF3D7_0611100	succinate dehydrogenase subunit 3, putative		2.07	0.63	13.39	5.83	41.46	51.55	33.31	51.5457	11.49	17.09	45.14	52.57	79.45	68.81	55.9	0	0	0	1
PGAL8A_00139700	834	7.687	387	0.464029	0.0562	0.7017	0.2694	2275	45	336	PF3D7_0611200	AP2 domain transcription factor, putative		1.12	2.46	11.7	7.37	14.98	42.74	3.34	42.7355	4.02	36.63	41.58	57.28	64.46	65.09	19.48	0	0	0	1
PGAL8A_00139800	843	314.434	840	0.996441	0.04	0.1009	0.0686	2873	1570	2659	PF3D7_0611300	conserved Apicomplexan protein, unknown function		4.09	2.16	28.99	3.14	58.83	78.31	6.64	78.3083	34.89	34.24	64.43	40.65	83.94	77.1	25.72	0	1	0	0
PGAL8A_00139900	2499	65.714	1389	0.555822	0.085	0.1784	0.1224	1405	770	1620	PF3D7_0611400	SWIB/MDM2 domain-containing protein		8.67	4.13	9.41	2.83	2.21	10.19	5.61	10.1874	54.63	44.92	36.45	38.91	19.53	26.42	23.84	0	0	0	1
PGAL8A_00140000	1116	128.605	831	0.744624	0.0478	0.2085	0.2603	2576	584	363	PF3D7_0611500	conserved Plasmodium protein, unknown function		1.06	0.15	1.98	1.36	4.98	121.91	9.04	121.909	3.77	3.89	15.3	27.3	38.98	84.23	29.86	0	1	0	0
PGAL8A_00140100	2145	91.823	717	0.334266	0.1895	0.1022	0.1233	257	1549	1603	PF3D7_0611600	basal complex transmembrane protein 1		5.45	1.01	33.46	34.76	5.69	90.43	93.13	93.1322	43.85	23.58	67.56	82.38	42.31	79.35	78.17	1	0	0	0
PGAL8A_00140300	7950	76.384	1101	0.138491	0.2563	0.2537	0.3591	101	413	137	PF3D7_0611800	conserved Plasmodium protein, unknown function		8.76	24.01	19.47	7.78	15.86	69.68	171.11	171.106	54.91	75.33	54.61	58.21	65.55	74.81	87.42	0	0	1	0
PGAL8A_00140400	537	52.677	468	0.871508	0.0535	0.001	0.1002	2362	3526	2002	PF3D7_0611900	lsm12, putative		10.81	17.02	64.93	28.23	109.76	240.97	242.41	242.411	58.85	69.43	81.11	79.78	89.74	91.47	90.96	1	1	1	0
PGAL8A_00140500	258	10.153	162	0.627907	0.0427	0.001	0.0118	2762	3526	4075	PF3D7_0612000	conserved Plasmodium protein, unknown function		7.78	3.42	41.95	23.05	50.46	51.7	27.43	51.6996	52.28	41.89	72.74	76.86	81.93	68.89	51.63	0	1	0	0
PGAL8A_00140600	1713	280.061	1371	0.80035	0.0144	0.0286	0.0116	3853	3070	4079	PF3D7_0612100	eukaryotic translation initiation factor 3 subunit L, putative		82.46	33.07	60.83	15.66	2.68	11.02	12.07	82.4618	89.13	79.45	79.92	70.5	23.71	28.15	34.53	1	0	0	0
PGAL8A_00140700	6234	88.744	1563	0.250722	0.0641	0.0733	0.1056	1992	2053	1899	PF3D7_0612200	leucine-rich repeat protein	PfLRR6	4.52	1.16	47.48	53.06	32.78	39.71	123.53	123.534	38.23	25.64	75.04	86.65	76.7	62.96	82.85	1	0	1	0
PGAL8A_00140800	354	24.244	129	0.364407	0.0844	0.2904	0.3296	1421	329	179	PF3D7_0612300	transmembrane protein 234, putative		1.46	1.11	5.99	1.65	10.47	18.74	7.84	18.7356	6.02	24.86	27.56	30.02	57.01	42.91	27.85	0	0	0	1
PGAL8A_00140900	705	19.337	453	0.642553	0.0972	0.0901	0.132	1159	1747	1448	PF3D7_0612400	conserved Plasmodium protein, unknown function		2.2	1	10.3	5.79	24.28	59.31	15.74	59.3073	13.12	23.46	38.46	52.43	71.94	71.84	39.21	0	0	0	1
PGAL8A_00141000	363	14.129	222	0.61157	0.056	0	0.2371	2279	4212	464	PF3D7_0612500	conserved Plasmodium protein, unknown function		3.42	2.82	2.25	3.21	169.16	2986.76	772.2	2986.76	29.02	38.72	16.39	41.13	92.54	99.1	98.13	0	1	1	0
PGAL8A_00141100	1254	39.32	804	0.641148	0.0497	0.0299	0.0613	2490	3030	2843	PF3D7_0612600	cytoplasmic tRNA 2-thiolation protein 1, putative		14.98	20.52	39.92	50.3	13.81	32.18	30.9	50.3036	64.81	72.74	71.49	86.33	62.84	57.9	54.2	1	0	0	0
PGAL8A_00141200	1008	36.016	663	0.657738	0.1083	0.2065	0.0742	970	598	2533	PF3D7_0612700	6-cysteine protein	Pf12	8.5	4.78	88.75	62.22	5.27	46.89	50.93	88.7543	54.2	47.39	85.15	87.99	40.51	67.11	65.74	1	0	0	0
PGAL8A_00141300	945	6.06	561	0.593651	0.1438	0.1297	0.1018	530	1198	1980	PF3D7_0612800	6-cysteine protein		6.83	8.38	5.83	3.42	11.43	34.74	22.57	34.7443	49.68	56.64	26.97	42.16	58.92	59.74	46.91	0	0	0	1
PGAL8A_00141400	2049	49.076	1470	0.717423	0.0223	0.0369	0.0245	3563	2838	3830	PF3D7_0612900	nucleolar GTP-binding protein 1, putative		253.5	320.86	126.45	36.65	57.89	55.45	161.57	320.857	95.69	95.4	88.9	82.92	83.75	70.4	86.62	1	1	1	0
PGAL8A_00141700	234	10.623	174	0.74359	0.1921	0	0.0214	249	4212	3898	PF3D7_0613100	conserved Plasmodium protein, unknown function		44.49	34.13	79.86	26.04	247.32	145.61	41.32	247.318	82.53	80.01	83.85	78.57	93.91	86.48	61.36	1	1	0	0
PGAL8A_00141800	189	15.025	177	0.936508	0.0902	0.001	0.0777	1294	3526	2454	PF3D7_0613200	conserved Plasmodium protein, unknown function		5.13	1.3	47.67	17.67	111.17	112.3	114.68	114.683	42.01	26.95	75.13	72.67	89.8	83.04	81.67	0	1	1	0
PGAL8A_00141900	4281	82.948	1503	0.351086	0.0845	0.0684	0.1058	1418	2167	1891	PF3D7_0613300	rhoptry protein ROP14		3.06	0.28	16.79	25.96	0.98	2.68	47.19	47.1949	24.74	7.11	51.03	78.54	10.44	12.53	64.36	0	0	0	1
PGAL8A_00142000	624	74.731	414	0.663462	0.0803	0.001	0.0483	1512	3526	3173	PF3D7_0613400	50S ribosomal protein L18, apicoplast, putative		6.02	14.2	211.62	320.92	250.09	313.31	250.62	320.921	46.43	66.07	92.49	96.59	93.98	93.6	91.31	1	1	1	0
PGAL8A_00142100	3183	21.303	1356	0.426013	0.0778	0.0895	0.0954	1577	1757	2092	PF3D7_0613500	AP-3 complex subunit beta, putative		2.5	4.46	10.96	5.24	4.97	30.49	27.35	30.4881	17.15	46.22	39.81	50.13	38.95	56.5	51.54	0	0	0	1
PGAL8A_00142200	1899	49.448	768	0.404423	0.1814	0.4282	0.1829	286	152	843	PF3D7_0613600	conserved Plasmodium protein, unknown function		2.19	0.74	12.01	10.6	4.39	42.02	21.63	42.0215	12.91	19.37	42.18	63.93	35.79	64.64	45.84	0	0	0	1
PGAL8A_00142300	1851	111.095	1272	0.687196	0.0472	0.1213	0.0931	2606	1307	2130	PF3D7_0613700	syntaxin-binding protein, putative		8.8	17.38	49.8	38.13	14.21	79.08	151.04	151.043	54.99	69.72	76.06	83.31	63.34	77.31	85.67	1	0	1	0
PGAL8A_00142400	9648	590.908	1980	0.205224	0.0389	0.129	0.101	2906	1210	1990	PF3D7_0613800	AP2 domain transcription factor, putative		4.72	1.46	121.65	121.5	19.57	14.93	40.06	121.648	39.45	28.91	88.56	92.23	69.1	36.23	60.41	1	0	0	0
PGAL8A_00142500	4431	29.602	2709	0.611374	0.1461	0.1403	0.0819	509	1088	2377	PF3D7_0613900	myosin E, putative		7.48	2.2	52.17	86.69	1.84	4.43	189.89	189.886	51.64	34.57	77.05	90.38	16.72	15.53	88.56	1	0	1	0
PGAL8A_00142700	2562	36.111	1338	0.522248	0.0954	0.1396	0.1281	1182	1102	1517	PF3D7_0614100	conserved Plasmodium protein, unknown function		4.16	2.03	11.66	16.22	6.97	37.53	23.42	37.525	35.55	33.34	41.47	71.23	47.88	61.61	47.69	0	0	0	1
PGAL8A_00142900	2568	19.332	1221	0.475467	0.0577	0.0652	0.1558	2218	2224	1113	PF3D7_0614200	cytosolic Fe-S cluster assembly factor NAR1, putative		6.38	5.08	6.93	2.37	3.94	17.98	12.29	17.9827	47.88	48.28	30.33	35.64	33.29	41.51	34.79	0	0	0	1
PGAL8A_00143000	2709	132.011	1035	0.38206	0.082	0.1475	0.0311	1474	1024	3646	PF3D7_0614300	major facilitator superfamily-related transporter, putative		114.66	234.62	332.76	158.2	35.45	23.72	97.75	332.761	92.09	94.56	94.6	93.54	77.51	49.77	78.95	1	0	0	0
PGAL8A_00143100	741	50.532	420	0.566802	0.1202	0.0451	0.1321	810	2645	1446	PF3D7_0614400	pre-mRNA-splicing factor CWF7, putative		37.51	52.24	27.64	6.51	13.6	68.28	850.78	850.775	79.97	85.32	63.23	54.58	62.52	74.43	98.42	1	0	1	0
PGAL8A_00143200	549	633.443	471	0.857923	0.0057	0.001	0.005	4132	3526	4185	PF3D7_0614500	60S ribosomal protein L19		196.8	509.54	379.53	57.28	166.66	129.78	496.96	509.542	94.62	96.4	95.26	87.29	92.44	85.03	96.61	1	1	1	0
PGAL8A_00143300	1668	8.465	615	0.368705	0.0849	0.1919	0.2006	1409	680	680	PF3D7_0614600	conserved Plasmodium protein, unknown function		2.15	0.21	2.85	5.42	11.38	59.48	8.34	59.4755	12.38	5.24	18.45	50.87	58.82	71.92	28.75	0	0	0	1
PGAL8A_00143400	1671	15.528	843	0.504488	0.1401	0.209	0.1119	569	583	1782	PF3D7_0614700	conserved Plasmodium protein, unknown function		3.22	0.44	13.24	23.16	10.48	72.21	45.48	72.2085	26.69	12.24	44.9	76.94	57.05	75.4	63.51	0	0	0	1
PGAL8A_00143500	1155	46.409	816	0.706494	0.0806	0.0197	0.1229	1507	3268	1606	PF3D7_0614800	endonuclease III homologue, putative		4.13	20.03	36.51	9.39	7.11	40.43	81.99	81.9888	35.28	72.29	69.57	61.73	48.33	63.42	75.71	0	0	0	1
PGAL8A_00143600	3105	22.824	1257	0.404831	0.098	0.0155	0.129	1141	3340	1503	PF3D7_0614900	conserved Plasmodium membrane protein, unknown function		2.76	1.06	24.83	16.7	10.26	58.5	98.63	98.6323	20.86	24.13	60.67	71.47	56.48	71.53	79.16	0	0	0	1
PGAL8A_00143700	414	12.921	174	0.42029	0.1378	0	0.1361	592	4212	1381	PF3D7_0615000	conserved Plasmodium protein, unknown function		24.62	12.23	14.55	2	48.13	196.95	145.94	196.951	73.46	63.2	47.17	32.92	81.34	89.75	85.11	0	1	1	0
PGAL8A_00143800	1173	123.892	819	0.69821	0.0481	0.1865	0.1131	2568	711	1758	PF3D7_0615100	enoyl-acyl carrier reductase	FABI	7.88	1.16	3.23	3.39	17.27	18.88	51.7	51.7	52.55	25.57	19.39	41.98	67.08	43.28	65.99	0	0	0	1
PGAL8A_00143900	1254	19.967	384	0.30622	0.1357	0.1623	0.3169	617	895	201	PF3D7_0615200	conserved Plasmodium protein, unknown function		1.66	0.35	4.86	1.3	6.69	115.91	76.5	115.914	7.28	9.42	24.06	26.59	46.7	83.42	74.43	0	1	0	0
PGAL8A_00144000	1983	7.676	654	0.329803	0.1035	0.12	0.1454	1050	1324	1247	PF3D7_0615300	GPI-anchored wall transfer protein 1, putative		2.78	0.82	12.23	2.8	11.23	131.28	23.99	131.28	21.14	20.81	42.81	38.76	58.42	85.2	48.43	0	1	0	0
PGAL8A_00144200	1869	90.34	1557	0.833066	0.0048	0.0105	0.0102	4159	3431	4105	PF3D7_0615500	cdc2-related protein kinase 5	Pfcrk5	5.57	2.43	116.68	48.43	5.97	43.94	191.57	191.572	44.4	36.44	88.19	85.89	43.52	65.76	88.66	1	0	1	0
PGAL8A_00144300	6378	11.447	2898	0.454374	0.1249	0.2015	0.1487	755	630	1201	PF3D7_0615600	zinc finger protein, putative		20.54	14.5	14.88	3.64	3.35	10.6	14.94	20.5419	70.21	66.37	47.98	43.41	28.89	27.33	38.19	0	0	0	1
PGAL8A_00144400	471	28.548	297	0.630573	0.0185	0.001	0.0442	3713	3526	3287	PF3D7_0615700	RNA and export factor binding protein, putative		35.68	11.95	44.73	11.86	90.12	172.68	38.62	172.675	79.25	62.92	74	65.78	88.06	88.45	59.62	0	1	0	0
PGAL8A_00144500	3117	33.573	1605	0.514918	0.0589	0.0681	0.0892	2182	2175	2212	PF3D7_0615800	conserved Plasmodium protein, unknown function		3.67	5.48	26.57	13.71	6.18	10.11	7.08	26.5745	31.54	49.63	62.33	68.5	44.57	26.26	26.69	0	0	0	1
PGAL8A_00144600	4611	35.323	1449	0.314249	0.065	0.3097	0.2323	1966	282	484	PF3D7_0615900	conserved Plasmodium protein, unknown function		4.93	17.26	28.4	9.81	8.8	39.39	22.97	39.3934	40.73	69.69	63.93	62.63	53.02	62.71	47.17	0	0	0	1
PGAL8A_00144700	939	27.897	771	0.821086	0.1043	0.0533	0.1686	1036	2479	969	PF3D7_0616000	pyridoxal kinase	PfPdxK	9.36	40.55	65.77	8.66	12.73	13.43	30.9	65.7666	56.41	82.21	81.31	60.21	61.1	33.29	54.21	1	0	0	0
PGAL8A_00144800	438	18.984	171	0.390411	0.178	0	0.0524	304	4212	3086	PF3D7_0616100	conserved Plasmodium protein, unknown function		15.28	16.97	18.9	3.31	114.92	116.37	107.14	116.368	65.1	69.34	54.04	41.65	90.01	83.5	80.58	0	1	1	0
PGAL8A_00144900	1773	182.106	867	0.489002	0.0213	0.091	0.0327	3602	1730	3604	PF3D7_0616200	kinetochore protein NDC80, putative		4.7	10.67	56.53	45.84	49.91	30.57	200.89	200.889	39.34	61.02	78.54	85.42	81.82	56.53	89.16	1	1	1	0
PGAL8A_00145000	801	71.515	162	0.202247	0.0223	0.2498	0.0451	3563	425	3259	PF3D7_0616300	conserved Plasmodium protein, unknown function		4.88	9.16	10.83	7.73	9.97	34.44	10.23	34.438	40.48	58.2	39.48	58.07	55.71	59.56	32.01	0	0	0	1
PGAL8A_00145100	3717	4.973	978	0.263115	0.2063	0.2996	0.2401	199	307	441	PF3D7_0616400	conserved Plasmodium protein, unknown function		3.56	3.19	4.05	1.81	1.09	5.5	4.72	5.4975	30.53	40.59	21.76	31.24	11.18	17.45	22.36	0	0	0	1
PGAL8A_00145300	3639	1.483	1149	0.315746	0.146	0.0758	0.1005	511	2012	1996	PF3D7_0616500	TRAP-like protein	TRAP2	3.83	0.96	1.08	1.21	0.94	25.81	150.25	150.247	32.77	22.9	11.25	25.64	10.18	51.76	85.6	0	0	1	0
PGAL8A_00145400	1662	43.128	582	0.350181	0.0947	0.1284	0.1076	1195	1219	1849	PF3D7_0616600	conserved protein, unknown function		2.83	1.48	17.18	7.36	4.39	48.21	272.67	272.675	21.83	29.18	51.55	57.21	35.79	67.73	92.25	0	0	1	0
PGAL8A_00145500	1167	10.94	846	0.724936	0.0401	0.0814	0.1573	2867	1896	1095	PF3D7_0616700	ras GTPAse, putative		2.15	4.5	11.19	0.57	6.24	31.69	39.69	39.6917	12.45	46.39	40.37	18.1	44.82	57.59	60.18	0	0	0	1
PGAL8A_00145600	1539	131.373	1257	0.816764	0.0298	0.0277	0.0462	3262	3084	3231	PF3D7_0616800	malate:quinone oxidoreductase, putative		8.47	30.08	46.87	14.64	7.44	28.35	29.48	46.8732	54.09	78.24	74.85	69.72	49.25	54.47	53.21	0	0	0	1
PGAL8A_00145700	3768	17.679	1065	0.282643	0.1781	0.0403	0.2041	301	2750	654	PF3D7_0616900	conserved Plasmodium protein, unknown function		9.84	10.48	11.91	1.78	3.11	16.25	44.45	44.4505	57.37	60.69	41.96	31.02	27.12	38.51	62.96	0	0	0	1
PGAL8A_00145800	1125	243.629	987	0.877333	0.0171	0.056	0.0507	3764	2417	3124	PF3D7_0617000	mitochondrial import receptor subunit TOM40, putative		40.41	79.43	46.08	3.63	9.6	26.5	18.51	79.4308	81.2	88.8	74.49	43.34	54.93	52.45	42.5	1	0	0	0
PGAL8A_00145900	3393	151.994	2007	0.591512	0.0595	0.0113	0.0158	2159	3416	4013	PF3D7_0617100	AP-2 complex subunit alpha, putative		39.38	56.32	36.41	19.17	7.53	19.49	36.95	56.322	80.79	86.03	69.52	73.91	49.59	44.02	58.42	1	0	0	0
PGAL8A_00146000	1347	693.469	729	0.541203	0.0359	0.001	0.0097	3023	3526	4113	PF3D7_0617200	conserved Plasmodium protein, unknown function		291.6	248.87	214.04	85.92	44.69	89.13	141.9	291.602	96.21	94.79	92.56	90.29	80.44	79.05	84.75	1	1	1	0
PGAL8A_00146100	420	9.885	408	0.971429	0.0236	0.0714	0.0362	3519	2106	3500	PF3D7_0617300	conserved Plasmodium protein, unknown function		25.6	5.47	76.02	34.99	155.53	117.71	106.6	155.53	74.16	49.58	83.21	82.5	91.99	83.68	80.49	1	1	1	0
PGAL8A_00146200	402	1872.12	396	0.985075	0.001	0.001	0.001	4222	3526	4217	PF3D7_0617800	histone H2A		443.19	892.47	25808.6	12644.8	12666.5	8047.7	52062.5	52062.5	97.47	97.73	99.81	99.72	99.57	99.67	100	1	1	1	0
PGAL8A_00146300	411	1745.74	363	0.883212	0.001	0.0051	0.001	4222	3512	4217	PF3D7_0617900	histone H3 variant		1734.72	1776.04	5015.14	16903.1	9191.5	7760.37	7070.56	16903.1	99.45	98.86	99.45	99.79	99.48	99.65	99.86	1	1	1	0
PGAL8A_00146400	2361	130.251	894	0.378653	0.1136	0.1766	0.0797	880	784	2418	PF3D7_0618000	conserved Plasmodium membrane protein, unknown function		3.23	0.7	35.87	46.65	3.55	5.11	37.5	46.6466	26.88	18.63	69.19	85.62	30.41	16.72	58.83	1	0	0	0
PGAL8A_00146500	1890	14.488	873	0.461905	0.1452	0.1224	0.2549	517	1288	387	PF3D7_0618100	conserved Plasmodium protein, unknown function		3.46	2.38	7.78	4.74	2.32	14.59	20.06	20.0592	29.44	35.97	32.27	48.26	20.55	35.5	43.98	0	0	0	1
PGAL8A_00146600	606	78.415	303	0.5	0.0643	0	0.0201	1984	4212	3932	PF3D7_0618200	conserved Plasmodium protein, unknown function		31.32	50.88	41.15	9.8	22.91	46.21	34.98	50.8783	77.2	85.13	72.3	62.55	71.18	66.68	57.15	1	0	0	0
PGAL8A_00146700	447	292.977	339	0.758389	0.0308	0.0348	0.0171	3232	2886	3990	PF3D7_0618300	60S ribosomal protein L27a, putative		882.04	851.98	741.17	844.25	421.68	216.86	278.57	882.045	98.79	97.63	97.27	98.23	95.78	90.62	92.52	1	1	1	0
PGAL8A_00146800	1680	1.091	636	0.378571	0.1439	0.2722	0.3124	527	369	212	PF3D7_0618400	conserved Plasmodium membrane protein, unknown function		2.03	0.35	0.6	0	1.77	3.51	0	3.5063	11.01	9.49	8.08	5.14	16.24	13.78	6.4	0	0	0	1
PGAL8A_00146900	942	120.444	897	0.952229	0.0379	0.0912	0.1037	2948	1726	1939	PF3D7_0618500	malate dehydrogenase		4.88	1.6	57.22	37.44	147.33	294.1	68.32	294.103	40.35	30.28	78.85	83.21	91.6	93.16	72.21	1	1	0	0
PGAL8A_00147000	825	13.692	501	0.607273	0.1029	0.0253	0.1175	1063	3129	1691	PF3D7_0618600	rhomboid protease ROM10		2.4	3.17	11.77	1.78	13.06	51.93	13.57	51.9346	16.03	40.5	41.73	31.06	61.68	69.07	36.39	0	0	0	1
PGAL8A_00147100	708	30.61	285	0.402542	0.0247	0.001	0.0783	3486	3526	2446	PF3D7_0618700	trafficking protein particle complex subunit 6A, putative		7.33	8.72	18.86	5.84	16.85	69.61	44.18	69.613	51.21	57.26	53.99	52.62	66.63	74.8	62.84	0	0	0	1
PGAL8A_00147200	2838	3.213	1329	0.468288	0.0697	0.1394	0.125	1816	1104	1571	PF3D7_0618800	conserved Plasmodium protein, unknown function		2.51	2.04	5.16	2.29	2.29	16.38	8.18	16.3765	17.28	33.37	24.93	35.12	20.29	38.81	28.41	0	0	0	1
PGAL8A_00147500	963	3.978	492	0.510903	0.0873	0.001	0.1398	1360	3526	1321	PF3D7_0619100	conserved Plasmodium protein, unknown function		6.77	4.04	9.44	3.52	4.5	14.41	0	14.4147	49.37	44.47	36.56	42.71	36.4	35.16	6.4	0	0	0	1
PGAL8A_00147600	2811	14.871	1308	0.465315	0.0864	0.0692	0.1238	1382	2153	1597	PF3D7_0619200	conserved Plasmodium protein, unknown function		34.11	14.97	15.3	4.52	3.48	9.27	30.71	34.1086	78.52	67.08	48.61	47.46	29.89	24.7	53.97	0	0	0	1
PGAL8A_00147700	9273	32.522	2436	0.262698	0.1372	0.1638	0.2189	602	879	565	PF3D7_0619300	conserved Plasmodium protein, unknown function		3.22	2.92	4.94	1.49	3	22.6	16.5	22.598	26.71	39.24	24.36	28.54	26.31	48.35	40.25	0	0	0	1
PGAL8A_00147900	3957	47.664	2850	0.720243	0.0766	0.071	0.0976	1608	2119	2053	PF3D7_0619500	acyl-CoA synthetase		8.62	11.35	11.81	2.18	0.84	1.67	1.34	11.8149	54.47	62.06	41.8	34.38	9.68	10.77	14.59	0	0	0	1
PGAL8A_00148000	2205	34.238	1194	0.541497	0.2072	0.168	0.2281	197	847	510	PF3D7_0619600	conserved Plasmodium protein, unknown function		1.8	3.12	4.56	0.56	1.98	5.93	0	5.9288	8.64	40.18	23.25	17.99	17.67	18.09	6.4	0	0	0	1
PGAL8A_00148100	1800	15.117	1014	0.563333	0.0884	0.014	0.042	1327	3366	3335	PF3D7_0619700	conserved Plasmodium protein, unknown function		2.96	1.17	17.39	12.36	8.27	53	18.39	53.0043	23.54	25.65	51.76	66.49	51.64	69.64	42.39	0	0	0	1
PGAL8A_00148200	6615	6.803	1797	0.271655	0.1442	0.2044	0.3142	524	607	207	PF3D7_0619800	conserved Plasmodium membrane protein, unknown function		8.89	9.05	11.41	2.83	1.94	9.01	1.84	11.4121	55.25	58.01	40.77	38.9	17.41	24.08	15.79	0	0	0	1
PGAL8A_00148300	696	50.623	585	0.840517	0.0203	0.001	0.0053	3647	3526	4179	PF3D7_0619900	splicing factor 3A subunit 2, putative	PRP11	13.98	11.86	29.89	4.19	15.35	54.27	25.91	54.268	63.63	62.78	65.17	46.29	64.96	70.05	50.3	0	0	0	1
PGAL8A_00148500	384	16.655	339	0.882812	0.0908	0.001	0.1973	1275	3526	703	PF3D7_0620100	conserved Plasmodium protein, unknown function		2.66	1.21	10.47	1.5	129	128.51	694.23	694.227	19.3	26.06	38.86	28.63	90.77	84.82	97.85	0	1	1	0
PGAL8A_00148600	771	1.877	447	0.579767	0.0219	0.0501	0.2294	3575	2554	502	PF3D7_0620200	conserved Plasmodium protein, unknown function		1.61	0.49	0.85	1.81	2.72	6.38	0	6.3826	6.98	13.46	9.8	31.36	24.07	19.02	6.4	0	0	0	1
PGAL8A_00148700	2253	2.727	1047	0.464714	0.2691	0.1498	0.4241	85	1006	83	PF3D7_0620300	conserved Plasmodium protein, unknown function		1.32	1.39	3.75	3.7	0.54	1.5	1.14	3.7465	5.07	27.96	20.98	43.9	7.92	10.35	14.02	0	0	0	1
PGAL8A_00148800	1230	134.229	399	0.32439	0.5348	0.2129	0.2748	7	565	319	PF3D7_0620400	merozoite surface protein 10		2.38	0.8	22.16	31.48	1.81	2.4	5.32	31.4771	15.74	20.58	58.02	81.29	16.55	11.93	23.44	1	0	0	0
PGAL8A_00148900	1482	61.122	1089	0.734818	0.0925	0.087	0.0666	1233	1797	2713	PF3D7_0620500	cleavage stimulation factor subunit 1, putative		25.5	24.44	20.6	8.13	7.09	18.76	14.33	25.4957	74.07	75.59	56.34	58.85	48.24	42.96	37.44	0	0	0	1
PGAL8A_00149000	873	10.849	60	0.0687285	0.0916	0.001	0.0015	1257	3526	4213	PF3D7_0620600	conserved Plasmodium protein, unknown function		10.38	5.29	3.53	1.66	23.86	46.44	9.49	46.442	58.18	48.9	20.36	30.15	71.65	66.85	30.47	0	0	0	1
PGAL8A_00149100	1071	82.983	768	0.717087	0.0381	0.1097	0.1193	2941	1448	1662	PF3D7_0620700	DnaJ protein, putative		6.52	1.24	14.74	17.27	27.57	659.86	172.16	659.864	48.54	26.34	47.55	72.2	74.1	96.94	87.47	0	1	1	0
PGAL8A_00149400	2439	27.179	1200	0.492005	0.0878	0.0125	0.068	1343	3398	2674	PF3D7_0621000	conserved Plasmodium protein, unknown function		3.99	11.07	12.08	2.55	3.38	13.84	8.28	13.8426	34.19	61.64	42.43	37.22	29.16	34.2	28.56	0	0	0	1
PGAL8A_00149500	3789	88.701	2820	0.74426	0.0567	0.0454	0.0524	2258	2638	3086	PF3D7_0621100	conserved Plasmodium protein, unknown function		4.34	1.46	34.01	42.15	3.25	31.43	24.44	42.1525	36.94	28.94	68.1	84.75	28.08	57.31	48.88	1	0	0	0
PGAL8A_00149600	891	20.615	771	0.86532	0.0191	0.001	0.0308	3688	3526	3650	PF3D7_0621200	pyridoxine biosynthesis protein PDX1	PfPdx1	202.44	1942.54	273.12	65.53	268.37	134.06	131.27	1942.54	94.77	99.01	93.77	88.37	94.31	85.49	83.5	1	1	1	0
PGAL8A_00149700	1941	9.812	1113	0.573416	0.0806	0.0775	0.1278	1507	1978	1527	PF3D7_0621300	mRNA binding Pumilio-homology domain protein, putative		63.33	48.37	11.44	0.99	5.31	21.41	11.16	63.3253	86.76	84.39	40.8	23.18	40.7	46.88	33.32	1	0	0	0
PGAL8A_00149900	1599	50.859	1233	0.771107	0.0736	0.0724	0.0638	1705	2078	2785	PF3D7_0621400	Pf77 protein // inner membrane complex protein 1j, putative	IMC1j	16.12	2.42	6.19	10.9	5.57	114.48	810.73	810.726	66.07	36.35	28.15	64.32	41.77	83.24	98.27	0	1	1	0
PGAL8A_00150000	975	18.161	705	0.723077	0.1014	0.0546	0.2187	1084	2445	566	PF3D7_0621500	ribonuclease P/MRP protein subunit RPP1, putative		2.63	9.99	11.08	6.55	45.18	72.42	8.13	72.4207	19.02	59.77	40.23	54.72	80.56	75.47	28.34	0	1	0	0
PGAL8A_00150200	4587	18.859	2220	0.483976	0.0729	0.2249	0.0871	1726	523	2257	PF3D7_0621700	conserved Plasmodium protein, unknown function		3.89	9.73	4.73	1.15	2.92	13.17	12.4	13.1686	33.24	59.32	23.61	24.81	25.79	32.77	35.02	0	0	0	1
PGAL8A_00150300	552	288.252	420	0.76087	0.0676	0	0.0274	1884	4212	3736	PF3D7_0621800	nascent polypeptide-associated complex subunit alpha, putative		950.4	1148.08	433.84	52.96	942.97	198.94	131.09	1148.08	98.86	98.2	95.72	86.64	97.78	89.89	83.49	1	1	1	0
PGAL8A_00150400	2049	55.979	1101	0.537335	0.1011	0.0972	0.0874	1088	1620	2246	PF3D7_0621900	signal recognition particle subunit SRP68, putative		80.3	34.76	62.2	44.26	15.05	13.14	10.2	80.2951	88.92	80.37	80.28	85.18	64.62	32.63	31.95	1	0	0	0
PGAL8A_00150500	630	2.372	258	0.409524	0.0836	0	0.1218	1440	4212	1630	PF3D7_0622000	conserved Plasmodium protein, unknown function		6.21	2.98	7.86	1.38	131.14	92.84	39.41	131.138	47.1	39.5	32.46	27.64	90.83	79.8	60.07	0	1	0	0
PGAL8A_00150600	4179	22.112	1410	0.337401	0.1581	0.3151	0.2925	408	271	256	PF3D7_0622100	conserved Plasmodium protein, unknown function		6.02	2.6	4.85	2.63	2.05	30.91	8	30.9147	46.48	37.51	23.96	37.68	18.19	56.88	28.08	0	0	0	1
PGAL8A_00150700	2166	13.528	1386	0.639889	0.0345	0.0305	0.0586	3098	3019	2926	PF3D7_0622200	radical SAM protein, putative		52.94	45.43	14.27	2.73	7.02	12.31	42.79	52.9417	84.77	83.56	46.6	38.31	48.02	31.07	62.14	1	0	0	0
PGAL8A_00150800	2208	14.81	1302	0.589674	0.0269	0.0855	0.067	3391	1828	2702	PF3D7_0622300	vacuolar transporter chaperone, putative		4.5	2.56	3.84	0.47	3.99	11.8	7.82	11.8026	38.08	37.3	21.24	16.51	33.6	29.84	27.82	0	0	0	1
PGAL8A_00150900	375	24.627	321	0.856	0.0581	0.1472	0.2525	2203	1029	395	PF3D7_0622400	conserved Apicomplexan protein, unknown function		1.08	1.23	9.36	2.28	7.39	16.53	0	16.5318	3.86	26.24	36.35	34.96	49.16	39.23	6.4	0	0	0	1
PGAL8A_00151000	1293	11.827	750	0.580046	0.1105	0.1237	0.2478	923	1269	416	PF3D7_0622500	RNA methyltransferase, putative		3.44	2.43	3.91	1.8	2.7	28.38	23.59	28.3753	29.22	36.4	21.38	31.23	23.97	54.51	47.86	0	0	0	1
PGAL8A_00151100	288	19.166	282	0.979167	0.0106	0.0314	0.0793	3974	2982	2429	PF3D7_0622600	cytochrome b-c1 complex subunit 9, putative		5.02	2.72	47.79	16.16	133.4	157.23	33.66	157.231	41.48	38.2	75.21	71.16	90.89	87.38	56.17	0	1	0	0
PGAL8A_00151200	1341	7.514	372	0.277405	0.1301	0.1644	0.2776	676	875	306	PF3D7_0622700	conserved Plasmodium membrane protein, unknown function		4.55	3.6	6.82	0.77	14.2	126.97	13.43	126.965	38.5	42.57	29.91	20.51	63.32	84.7	36.23	0	1	0	0
PGAL8A_00151300	3864	196.063	2829	0.732143	0.0221	0.0201	0.0218	3570	3260	3889	PF3D7_0622800	leucine--tRNA ligase, putative		94.34	92.43	59.84	11.71	6.89	20.44	31.56	94.3434	90.39	89.93	79.66	65.5	47.31	45.25	54.68	1	0	0	0
PGAL8A_00151400	6537	5.014	1065	0.162919	0.0696	0.3311	0.3007	1820	248	238	PF3D7_0622900	AP2 domain transcription factor AP2Tel // AP2 domain transcription factor AP2-SP3, putative	ApiAP2	44.62	15.7	15.56	5.17	5.01	22.72	67.26	67.2615	82.57	67.86	49	49.82	39.15	48.45	71.78	1	0	0	0
PGAL8A_00151500	987	0.789	612	0.620061	0.5093	0.0659	0.1081	11	2214	1841	PF3D7_0623000	chorismate synthase	PfCS	6.39	5.31	51.07	22.27	10	16.52	18.55	51.0681	47.98	49	76.56	76.48	55.84	39.19	42.57	0	0	0	1
PGAL8A_00151600	2481	138.165	819	0.330109	0.0387	0.0842	0.112	2914	1849	1781	PF3D7_0623100	nuclear polyadenylated RNA-binding protein NAB2, putative		423.39	266.35	207.91	62.37	55.33	35.97	173.63	423.389	97.35	94.91	92.4	88	83.14	60.72	87.54	1	1	1	0
PGAL8A_00151700	1053	22.695	654	0.621083	0.1105	0.0788	0.1634	923	1951	1031	PF3D7_0623200	ferredoxin--NADP reductase		26.75	22.1	30.53	12.64	5.42	128.12	77.73	128.12	74.76	74.02	65.74	66.82	41.13	84.8	74.7	0	1	0	0
PGAL8A_00151800	711	19.506	546	0.767932	0.1537	0.1174	0.1291	447	1350	1501	PF3D7_0623300	EGF-like membrane protein, putative		21.88	9.14	187.38	71.1	149.1	76.49	47.23	187.382	71.42	58.18	91.86	88.99	91.73	76.51	64.38	1	1	0	0
PGAL8A_00151900	1167	23.7	636	0.544987	0.0774	0.0731	0.0389	1588	2059	3430	PF3D7_0623400	MEI2-like RNA-binding protein, putative		2.36	0.37	3.4	0.46	12.85	86.97	33.78	86.9713	15.34	10.17	19.94	16.4	61.31	78.71	56.29	0	0	0	1
PGAL8A_00152000	798	29.807	603	0.755639	0.0817	0.0287	0.0878	1481	3066	2239	PF3D7_0623500	superoxide dismutase [Fe]	PfSOD2	11.73	4.45	29.69	9.54	65.08	149.46	141.49	149.459	60.45	46.18	65.03	61.97	85.01	86.76	84.71	0	1	1	0
PGAL8A_00152100	1860	114.11	1038	0.558065	0.0312	0.0222	0.0444	3223	3207	3282	PF3D7_0623600	transcription or splicing factor-like protein, putative		85.13	63.42	121.52	72.52	49.51	12.75	74.95	121.522	89.42	87.02	88.54	89.22	81.7	31.75	74.03	1	1	0	0
PGAL8A_00152200	2691	21.53	1590	0.590858	0.0539	0.1552	0.194	2348	955	736	PF3D7_0623700	ATP-dependent RNA helicase SUV3, putative		12.6	4.25	11.57	2.58	2.64	16.89	14.34	16.8943	61.81	45.35	41.08	37.41	23.35	40.02	37.48	0	0	0	1
PGAL8A_00152300	5265	46.652	2016	0.382906	0.0478	0.0405	0.0292	2576	2746	3689	PF3D7_0623800	tyrosine kinase-like protein, putative		321.53	127.44	35.53	9.29	5.99	7.83	114.99	321.527	96.52	91.92	68.88	61.49	43.69	21.81	81.72	1	0	1	0
PGAL8A_00152400	867	35.322	813	0.937716	0.0208	0.0571	0.0468	3620	2391	3213	PF3D7_0623900	ribonuclease H2 subunit A, putative		9.63	6.86	36.92	7.12	26.64	40.36	450.24	450.24	56.95	53.19	69.83	56.22	73.58	63.39	96.09	0	0	1	0
PGAL8A_00152500	1470	41.248	1368	0.930612	0.0303	0.017	0.0196	3245	3312	3944	PF3D7_0624000	hexokinase		162.64	326.9	556.77	284.99	14.1	6.67	73.64	556.768	93.89	95.45	96.66	96.16	63.19	19.44	73.64	1	0	0	0
PGAL8A_00152600	810	27.076	657	0.811111	0.0215	0.001	0.0759	3590	3526	2496	PF3D7_0624100	conserved Plasmodium protein, unknown function		5.86	1.94	15.07	8.97	9.67	76.7	88.83	88.8338	45.68	32.8	48.29	60.84	55.12	76.63	77.42	0	0	0	1
PGAL8A_00152700	834	31.617	285	0.341727	0.1338	0.1612	0.1396	638	907	1329	PF3D7_0624200	conserved Plasmodium protein, unknown function		8.55	7.34	67.21	17.47	33.66	198.98	445.92	445.923	54.23	54.46	81.5	72.43	76.94	89.91	96.04	1	1	1	0
PGAL8A_00152800	540	8.07	321	0.594444	0.0975	0.1418	0.0567	1152	1077	2969	PF3D7_0624300	CPW-WPC family protein		3.93	1.85	16.96	4.74	674.01	2247.79	1090.72	2247.79	33.62	32.06	51.36	48.26	97.14	98.94	98.82	0	1	1	0
PGAL8A_00152900	1671	24.979	954	0.570916	0.0902	0.1238	0.2088	1294	1266	631	PF3D7_0624400	conserved Plasmodium protein, unknown function		5.09	5.78	34.69	24.98	15.49	18.49	16.11	34.6939	41.84	50.42	68.51	77.91	65.14	42.42	39.66	0	0	0	1
PGAL8A_00153000	270	23.658	258	0.955556	0.0872	0.001	0.001	1364	3526	4217	PF3D7_0624500	anaphase-promoting complex subunit 11, putative		18.56	13.22	384.02	239.48	489.17	357.23	264.28	489.165	68.61	64.64	95.34	95.45	96.3	94.43	91.9	1	1	1	0
PGAL8A_00153100	7815	528.271	4431	0.566987	0.0139	0.0079	0.0181	3869	3487	3970	PF3D7_0624600	SNF2 helicase, putative	PfISWI	131.6	98.05	123.25	48.08	9.58	28.7	103.39	131.598	92.92	90.46	88.68	85.82	54.87	54.91	79.82	1	0	0	0
PGAL8A_00153200	699	10.376	444	0.635193	0.1091	0.6999	0.4722	952	48	62	PF3D7_0624700	N-acetylglucosaminylphosphatidylinositol deacetylase, putative		12.35	3.09	19.91	8.3	11.38	28.53	7.52	28.5338	61.51	40.04	55.27	59.2	58.78	54.67	27.36	0	0	0	1
PGAL8A_00153300	1695	7.504	1149	0.677876	0.2697	0.2728	0.4852	84	367	58	PF3D7_0624800	conserved Plasmodium protein, unknown function		2.51	0.3	3.16	0.16	2.4	11.01	0.75	11.012	17.26	7.65	19.3	11.68	21.34	28.11	13.31	0	0	0	1
PGAL8A_00153400	1326	6.116	789	0.595023	0.0504	0.0255	0.1126	2468	3126	1769	PF3D7_0624900	GAS8-like protein, putative		1.72	0.3	4.43	0.22	3.62	36.3	40.78	40.7819	7.75	7.69	22.76	12.53	31.04	60.88	60.9	0	0	0	1
PGAL8A_00153600	1206	41.817	723	0.599502	0.1519	0.1094	0.1655	461	1451	1014	PF3D7_0625100	sphingomyelin synthase 2, putative		1.22	0.13	1.17	0.73	25.93	742.21	4.66	742.212	4.57	3.69	11.62	20.22	73.08	97.14	22.15	0	1	0	0
PGAL8A_00153700	1110	51.586	345	0.310811	0.1258	0.2484	0.175	744	433	906	PF3D7_0625200	conserved Plasmodium protein, unknown function		2.43	1.3	14.21	7.36	15	55.58	27.79	55.5837	16.43	26.99	46.53	57.23	64.51	70.45	51.81	0	0	0	1
PGAL8A_00153800	3444	28.958	1824	0.529617	0.0668	0.1069	0.1291	1904	1483	1501	PF3D7_0625300	DNA polymerase 1, putative		6.36	4.12	26.44	8.81	3.3	15.94	20.01	26.4431	47.79	44.83	62.18	60.57	28.47	38	43.9	0	0	0	1
PGAL8A_00153900	1023	38.133	462	0.451613	0.1542	0.0857	0.231	445	1824	487	PF3D7_0625400	conserved Plasmodium protein, unknown function		127.22	38.01	14.55	4.51	3.64	14.71	9.03	127.22	92.75	81.58	47.14	47.45	31.19	35.76	29.84	1	0	0	0
PGAL8A_00154000	894	9.591	375	0.419463	0.1128	0.2875	0.1884	892	333	787	PF3D7_0625500	conserved Plasmodium membrane protein, unknown function		10.4	2.19	5.52	2.03	13.23	19.02	1.38	19.024	58.2	34.45	25.98	33.18	61.88	43.52	14.71	0	0	0	1
PGAL8A_00154100	1902	79.69	1449	0.76183	0.0127	0.0247	0.0225	3904	3145	3871	PF3D7_0625600	poly(A) polymerase PAP, putative		26.98	9.24	6.03	2.02	2.84	15.18	2.95	26.9779	74.99	58.37	27.73	33.1	25.05	36.8	18.3	0	0	0	1
PGAL8A_00154200	282	23.348	168	0.595745	0.055	0	0.1083	2310	4212	1836	PF3D7_0625700	conserved Plasmodium protein, unknown function		3.51	4	24.66	3.96	54.43	168.09	9.42	168.089	30	44.38	60.46	45.25	82.93	88.19	30.38	0	1	0	0
PGAL8A_00154400	936	2.815	462	0.49359	0.2344	0.1505	0.4249	139	996	82	PF3D7_0625900	conserved Plasmodium protein, unknown function		2.87	0.32	1.01	0	0.34	5.04	422.16	422.165	22.35	8.53	10.84	5.14	6.61	16.65	95.72	0	0	1	0
PGAL8A_00154500	4248	15.72	2115	0.497881	0.2376	0.2036	0.0578	133	615	2940	PF3D7_0626000	conserved Plasmodium protein, unknown function		21.39	22.42	11.65	3.19	2.49	59.59	3.99	59.5895	71.07	74.26	41.41	41.01	22.09	72.04	20.64	0	0	0	1
PGAL8A_00154600	1170	39.359	912	0.779487	0.0774	0.0403	0.086	1588	2750	2276	PF3D7_0626100	oxidoreductase, short-chain dehydrogenase family, putative		20.21	22.44	53.57	11.99	62.62	52.59	25.51	62.6221	69.98	74.31	77.53	65.97	84.52	69.5	49.92	0	1	0	0
PGAL8A_00154700	1137	11.146	606	0.532982	0.1474	0.029	0.1527	497	3056	1140	PF3D7_0626200	conserved Plasmodium protein, unknown function		35.54	7.7	8.38	1.64	22.31	78.58	0	78.5827	79.18	55.32	33.84	29.91	70.88	77.19	6.4	0	0	0	1
PGAL8A_00154800	1425	67.006	1239	0.869474	0.0342	0.077	0.1144	3109	1993	1739	PF3D7_0626300	3-oxoacyl-acyl-carrier protein synthase I/II		6.75	0.89	16.15	3.72	2.32	7.84	0	16.1456	49.32	21.85	50.04	43.98	20.63	21.86	6.4	0	0	0	1
PGAL8A_00154900	2526	27.657	1299	0.514252	0.1066	0.0874	0.1463	1001	1788	1239	PF3D7_0626400	Sec14 domain containing protein		3.21	0.59	19.34	11.32	5.81	42.03	57.49	57.4931	26.54	16.34	54.49	64.83	42.91	64.67	68.24	0	0	0	1
PGAL8A_00155000	2730	27.083	1122	0.410989	0.061	0.0309	0.0444	2104	2999	3282	PF3D7_0626500	conserved Plasmodium protein, unknown function		2.79	0.67	1.33	1.24	3.17	14.15	9.84	14.1451	21.2	18	12.52	25.99	27.52	34.76	31.25	0	0	0	1
PGAL8A_00155100	435	7.324	309	0.710345	0.0565	0.1261	0.1861	2264	1239	803	PF3D7_0626600	conserved Plasmodium protein, unknown function		9.77	1.45	7.33	2.01	13.56	28.11	6.39	28.1072	57.21	28.69	31.23	33.07	62.42	54.28	25.31	0	0	0	1
PGAL8A_00155200	1128	86.113	993	0.880319	0.0378	0.05	0.0834	2953	2557	2338	PF3D7_0626700	conserved protein, unknown function		98.7	21.75	46.26	6.04	18.28	15.51	12.5	98.6976	90.81	73.64	74.55	53.28	68.03	37.29	35.21	1	0	0	0
PGAL8A_00155300	1536	412.093	1485	0.966797	0.0201	0.0815	0.0199	3656	1894	3935	PF3D7_0626800	pyruvate kinase	PfPyrK	898.65	832.14	2304.04	518.94	63.36	8.9	100.2	2304.04	98.82	97.54	99.12	97.58	84.72	23.96	79.47	1	1	0	0
PGAL8A_00155400	1056	23.234	684	0.647727	0.0998	0.3247	0.3341	1109	256	174	PF3D7_0626900	mitochondrial ribosomal protein L46 precursor, putative		8.58	2.2	13.46	4.2	8.45	32.05	5	32.0523	54.37	34.59	45.32	46.41	52.07	57.85	22.83	0	0	0	1
PGAL8A_00155500	345	10.762	219	0.634783	0.0965	0.001	0.1535	1172	3526	1135	PF3D7_0627000	conserved Plasmodium protein, unknown function		5.33	0.48	0.25	0	27.08	64.62	37.81	64.6245	43.29	13.09	5.45	5.14	73.79	73.63	59.07	0	0	0	1
PGAL8A_00155600	4605	137.239	2877	0.624756	0.0296	0.04	0.024	3273	2760	3844	PF3D7_0627100	ankyrin-repeat protein, putative		76.23	50.01	50.65	20.53	7.87	46.44	41.11	76.2344	88.42	84.85	76.39	75.11	50.6	66.83	61.12	1	0	0	0
PGAL8A_00155800	1566	79.373	459	0.293103	0.08	0.017	0.2165	1524	3312	586	PF3D7_0627300	E3 ubiquitin-protein ligase RNF5, putative		107.71	81.58	215.42	100.58	36.58	106.2	241.48	241.48	91.62	89.03	92.63	91.21	77.9	81.86	90.91	1	1	1	0
PGAL8A_00155900	522	44.983	384	0.735632	0.035	0.1238	0.0872	3072	1266	2254	PF3D7_0627400	mitochondrial import inner membrane translocase subunit TIM22, putative		5.2	6.13	10.18	7.58	23.24	72.95	21.64	72.9524	42.37	51.38	38.19	57.8	71.42	75.59	45.86	0	0	0	1
PGAL8A_00156000	570	562.3	567	0.994737	0.0876	0.1326	0.1175	1347	1171	1691	PF3D7_0627500	protein DJ-1		366.27	693.45	692.11	223.78	616.41	88.94	382.92	693.448	96.87	97.18	97.14	95.21	96.88	79.02	94.96	1	1	1	0
PGAL8A_00156100	1059	59.819	495	0.467422	0.1242	0.2565	0.136	765	408	1384	PF3D7_0627600	conserved Plasmodium protein, unknown function		7.05	2.14	2.01	0.74	8.17	69.21	14.17	69.2054	50.35	34.07	15.44	20.31	51.29	74.69	37.22	0	0	0	1	PGAL8A_00002000	456	300
PGAL8A_00156200	3213	146.777	2571	0.800187	0.0143	0.0467	0.0306	3858	2609	3653	PF3D7_0627700	transportin		51.25	27.81	88.84	26.97	6.1	16.33	20.72	88.8378	84.42	77.36	85.18	79.05	44.3	38.65	44.87	1	0	0	0
PGAL8A_00156300	2676	173.926	1875	0.700673	0.04	0.0505	0.0845	2873	2545	2311	PF3D7_0627800	acetyl-CoA synthetase, putative		71.47	60.28	93.42	36.91	4.81	4.73	19.16	93.4224	87.81	86.6	85.91	82.98	38.06	16.13	43.08	1	0	0	0
PGAL8A_00156400	942	42.787	483	0.512739	0.2198	0.163	0.1956	166	888	723	PF3D7_0627900	ribonuclease P protein subunit p29, putative	RPP29	19.07	16.47	19.35	6.71	4.27	9.52	3.19	19.3515	69	68.7	54.51	55.18	35.02	25.13	18.92	0	0	0	1
PGAL8A_00156500	519	12.414	474	0.913295	0.0877	0.0241	0.1392	1344	3163	1340	PF3D7_0628000	6-pyruvoyltetrahydropterin synthase		11	17.77	13.56	1.13	12.64	5.76	16.08	17.7721	59.13	70.09	45.49	24.49	60.86	17.81	39.61	0	0	0	1
PGAL8A_00156600	26628	109.272	16143	0.606242	0.1045	0.1042	0.1122	1033	1525	1774	PF3D7_0628100	HECT-domain (ubiquitin-transferase), putative		3.88	0.66	28.59	75.38	4.02	24.33	389.13	389.132	33.17	17.77	64.12	89.44	33.72	50.37	95.14	1	0	1	0
PGAL8A_00156700	8733	68.348	3597	0.411886	0.0905	0.0694	0.1438	1285	2147	1266	PF3D7_0628200	protein kinase PK4 // eukaryotic translation initiation factor 2-alpha kinase	PERK	61.72	43.49	51.75	18.65	5.99	22.42	59.95	61.7225	86.53	83.19	76.89	73.46	43.64	48.12	69.21	1	0	0	0
PGAL8A_00156900	1011	1.992	540	0.534125	0.3148	0.4601	0.2804	54	131	297	PF3D7_0628400	protease, putative		5.63	0.23	2.9	0.86	38.81	55.5	48.01	55.501	44.63	5.75	18.6	21.81	78.75	70.42	64.71	0	0	0	1
PGAL8A_00157000	897	14.347	738	0.822742	0.0194	0.028	0.0997	3678	3077	2014	PF3D7_0628500	conserved Plasmodium protein, unknown function		6.7	2.5	5.36	1.24	12.49	85.83	11.77	85.8262	49.14	36.87	25.53	25.95	60.64	78.5	34.12	0	0	0	1
PGAL8A_00157100	1149	82.855	675	0.587467	0.0355	0.065	0.0369	3050	2227	3479	PF3D7_0628600	DNA methyltransferase 1-associated protein 1, putative		19.83	21.29	22.17	4.31	14.62	42.11	58	57.9951	69.67	73.38	58.04	46.77	63.86	64.74	68.53	0	0	0	1
PGAL8A_00157200	1545	2.052	306	0.198058	0.1504	0.2814	0.842	476	348	9	PF3D7_0628700	conserved Plasmodium protein, unknown function		4.91	3.64	5.97	1.19	3.9	18.58	3.25	18.5767	40.63	42.86	27.51	25.44	33.06	42.58	19.13	0	0	0	1
PGAL8A_00157300	2100	30.413	1278	0.608571	0.0831	0.1304	0.1668	1453	1196	997	PF3D7_0628800	glutamyl-tRNA(Gln) amidotransferase subunit B		1.81	5.18	18.2	2.88	1.33	3.48	2.11	18.204	8.81	48.47	53.11	39.19	12.91	13.74	16.41	0	0	0	1
PGAL8A_00157400	3594	2.863	1422	0.395659	0.1511	0.405	0.2586	472	176	370	PF3D7_0628900	RAP protein, putative		2.34	3.15	6.41	0.41	8.89	23.2	6.79	23.1985	15.09	40.33	28.8	15.78	53.3	49.23	26.05	0	0	0	1
PGAL8A_00157500	861	18.483	549	0.637631	0.0635	0.1102	0.1412	2014	1441	1306	PF3D7_0629000	N-acetyltransferase, putative		1.67	2.44	2.82	0.34	3.64	13.17	0	13.1683	7.35	36.56	18.3	14.67	31.21	32.75	6.4	0	0	0	1
PGAL8A_00157600	2376	51.817	1692	0.712121	0.0259	0.0446	0.0798	3439	2654	2413	PF3D7_0629100	nicotinate phosphoribosyltransferase, putative		14.47	17.9	33.61	15.74	2.7	21.2	61.62	61.6235	64.29	70.21	67.75	70.68	23.99	46.48	69.85	0	0	0	1
PGAL8A_00157700	1137	242.456	960	0.844327	0.0378	0.0569	0.0302	2953	2401	3663	PF3D7_0629200	DnaJ protein, putative		36.71	73.46	94.1	14.91	2.69	11.28	258.28	258.283	79.64	88.16	86	70	23.94	28.63	91.57	1	0	1	0
PGAL8A_00157800	2172	77.187	1188	0.546961	0.1437	0.0375	0.1473	531	2824	1219	PF3D7_0629300	phosphatidylcholine-sterol acyltransferase, putative // phospholipase, putative	PfPL	2.9	1.44	7.91	38.44	1.82	3.29	9.72	38.4397	22.68	28.58	32.59	83.42	16.63	13.55	30.88	1	0	0	0
PGAL8A_00157900	1623	37.151	594	0.365989	0.085	0.0313	0.2009	1405	2986	675	PF3D7_0629400	RNA-binding protein, putative		6.06	38.51	62.27	7.02	10.23	35.7	7.17	62.2713	46.67	81.77	80.34	56	56.41	60.39	26.81	1	0	0	0
PGAL8A_00158000	1821	54.689	852	0.467875	0.0488	0.0231	0.0974	2531	3185	2057	PF3D7_0629500	amino acid transporter, putative		71.03	93.62	49.93	6.29	8.82	10.91	17.67	93.6165	87.74	90.13	76.15	53.97	53.04	27.87	41.72	1	0	0	0
PGAL8A_00158100	744	17.9	453	0.608871	0.064	0.001	0.3902	1998	3526	112	PF3D7_0629600	conserved Plasmodium protein, unknown function		26.5	22.57	9.81	1.88	5.64	13.42	0	26.4985	74.59	74.47	37.29	31.88	42.08	33.25	6.4	0	0	0	1
PGAL8A_00158200	19224	123.082	6663	0.346598	0.0879	0.1292	0.1826	1340	1208	846	PF3D7_0629700	SET domain protein, putative	PfSET1	22.45	30.4	34.59	9.47	5.15	20.27	42.67	42.6741	71.85	78.47	68.46	61.85	39.93	45.02	62.04	0	0	0	1
PGAL8A_00158300	2997	67.827	2154	0.718719	0.0729	0.133	0.1251	1726	1166	1568	PF3D7_0629800	cullin-like protein, putative		38	8.61	16.36	3.99	3.86	30.97	5.78	37.9985	80.21	57.09	50.35	45.39	32.8	56.95	24.13	1	0	0	0
PGAL8A_00158400	981	107.898	792	0.807339	0.0456	0.1963	0.1409	2665	662	1308	PF3D7_0629900	sec14-like cytosolic factor or phosphatidylinositol/phosphatidylcholine transfer protein, putative		28.24	14.62	23.85	9.83	22.95	63.15	29.77	63.1513	75.89	66.55	59.81	62.64	71.21	73.31	53.44	0	0	0	1
PGAL8A_00158500	624	27.684	477	0.764423	0.1604	0.0669	0.1707	395	2201	946	PF3D7_0630000	CPW-WPC family protein		2.85	0.38	0.49	0	64.18	877.95	423.23	877.95	22.02	10.36	7.41	5.14	84.84	97.59	95.76	0	1	1	0
PGAL8A_00158600	1779	3.582	1080	0.607083	0.0487	0.1566	0.2666	2537	944	344	PF3D7_0630100	conserved Plasmodium protein, unknown function		2.98	4.41	2.95	0.87	1.57	11.68	33.02	33.0179	23.63	46.02	18.71	21.86	14.61	29.62	55.65	0	0	0	1
PGAL8A_00158700	402	26.006	315	0.783582	0.1266	0.001	0.1155	731	3526	1725	PF3D7_0630200	secreted ookinete protein, putative		1.54	0.78	2.42	2.88	380.31	3978.92	713.28	3978.92	6.47	20.08	16.98	39.16	95.48	99.31	97.92	0	1	1	0
PGAL8A_00158800	8211	59.505	6234	0.759225	0.0286	0.0215	0.0445	3321	3223	3278	PF3D7_0630300	DNA polymerase epsilon catalytic subunit A, putative		2.23	1.18	16.68	3.94	3.18	11.73	4.49	16.677	13.5	25.78	50.93	45.16	27.63	29.76	21.76	0	0	0	1
PGAL8A_00158900	1098	22.016	504	0.459016	0.1911	0.001	0.0918	252	3526	2163	PF3D7_0630400	conserved Plasmodium protein, unknown function		2.14	0.2	10.06	13.06	38.16	188.57	2.39	188.571	12.27	4.89	37.96	67.44	78.5	89.27	16.87	0	1	0	0
PGAL8A_00159000	1362	11.54	1038	0.762115	0.0857	0.1438	0.1706	1397	1059	948	PF3D7_0630500	ribosome biogenesis protein YTM1, putative		17.43	11.65	5.88	0.39	8.15	38.4	0	38.3991	67.6	62.52	27.23	15.6	51.25	61.99	6.4	0	0	0	1
PGAL8A_00159100	2625	51.337	1614	0.614857	0.0444	0.0162	0.0263	2702	3330	3775	PF3D7_0630600	conserved protein, unknown function		8.29	7.74	53.98	21.98	8.85	26.86	44.35	53.9814	53.71	55.48	77.64	76.18	53.12	52.83	62.9	0	0	0	1
PGAL8A_00159200	1851	4.331	669	0.361426	0.1544	0.4282	0.3531	442	152	144	PF3D7_0630700	bifunctional methylenetetrahydrofolate dehydrogenase/cyclohydrolase, putative		6.24	3.82	3.63	1.34	1.28	17.24	0	17.2364	47.36	43.81	20.69	27.11	12.57	40.49	6.4	0	0	0	1
PGAL8A_00159400	1062	10.289	210	0.19774	0.0471	0.0391	0.1344	2614	2781	1412	PF3D7_0630800	TPH domain-containing protein, putative		5.06	1.35	3.71	1	5.33	37.75	91.61	91.6099	41.63	27.59	20.89	23.39	40.77	61.71	77.94	0	0	0	1
PGAL8A_00159500	1842	48.34	1266	0.687296	0.0127	0.0134	0.0098	3904	3381	4112	PF3D7_0630900	ATP-dependent RNA helicase HAS1	PfH69	36.47	42.54	14.81	1.95	6.21	10.41	19.37	42.5431	79.57	82.83	47.78	32.53	44.69	26.88	43.36	1	0	0	0
PGAL8A_00043000	318	29.289	201	0.632075	0.3063	0.001	1.4207	57	3526	3	PF3D7_0702900	centrin, putative		18.69	13.46	14.99	1.81	34.28	146.3	43.18	146.303	68.76	65.07	48.17	31.36	77.06	86.57	62.29	0	1	0	0
PGAL8A_00043100	4962	30.779	2232	0.449819	0.1566	0.192	0.3231	424	678	189	PF3D7_0703000	conserved Plasmodium protein, unknown function		1.51	1.32	4.14	1.38	1.45	8.01	3.29	8.0079	6.27	27.26	21.98	27.7	13.78	22.19	19.34	0	0	0	1
PGAL8A_00043200	534	26.781	435	0.814607	0.0231	0.001	0.0857	3537	3526	2282	PF3D7_0703100	conserved Plasmodium protein, unknown function		8.07	3.8	3.03	0.54	15.8	45.34	10.31	45.3442	53.18	43.73	18.89	17.71	65.48	66.25	32.11	0	0	0	1
PGAL8A_00043300	3933	51.333	1839	0.467582	0.1127	0.3021	0.2075	893	302	642	PF3D7_0703200	conserved Plasmodium protein, unknown function		6.05	20.92	73.78	119.2	24.19	41.41	75.36	119.205	46.62	72.98	82.83	92.14	71.84	64.15	74.1	1	0	0	0
PGAL8A_00043400	420	11.144	219	0.521429	0.0366	0.0751	0.0653	2998	2024	2744	PF3D7_0703300	conserved Plasmodium protein, unknown function		5.92	12.77	17.73	0.67	24.44	92.54	31.73	92.5405	45.94	64.03	52.26	19.41	72.03	79.68	54.82	0	0	0	1
PGAL8A_00043500	2067	12.734	1107	0.535559	0.0814	0.1172	0.214	1487	1357	594	PF3D7_0703400	conserved Plasmodium protein, unknown function		13.9	6.21	8.45	2.86	2.86	7.4	0.57	13.9014	63.51	51.46	33.98	39.07	25.26	20.81	13.07	0	0	0	1
PGAL8A_00043600	6195	108.129	3372	0.54431	0.0215	0.01	0.0251	3590	3453	3807	PF3D7_0703500	erythrocyte membrane-associated antigen		143.78	312.4	164.93	39.32	34.35	47.3	37.51	312.395	93.44	95.33	91.07	83.75	77.08	67.28	58.85	1	0	0	0
PGAL8A_00043700	786	139.104	405	0.515267	0.0322	0.0704	0.0409	3195	2129	3374	PF3D7_0703600	conserved Plasmodium protein, unknown function		9.39	3.01	68.31	73.38	11.01	34.03	113.49	113.491	56.45	39.73	81.72	89.27	58.08	59.27	81.56	1	0	1	0
PGAL8A_00043800	609	92.796	360	0.591133	0.1481	0.2473	0.1288	493	436	1507	PF3D7_0703700	conserved Plasmodium protein, unknown function		61.24	93.56	50.25	8.62	9.24	25.85	11.19	93.5633	86.41	90.08	76.25	60.01	54.02	51.81	33.36	1	0	0	0
PGAL8A_00043900	2643	14.885	1005	0.38025	0.0323	0.2255	0.1302	3193	519	1483	PF3D7_0703800	conserved Plasmodium protein, unknown function		3.32	0.52	3.19	0.19	0.93	4.94	3.08	4.9429	27.86	14.5	19.32	11.98	10.14	16.43	18.66	0	0	0	1
PGAL8A_00044000	11358	20.89	4581	0.403328	0.1517	0.154	0.1903	465	966	768	PF3D7_0703900	conserved Plasmodium membrane protein, unknown function		32.61	25.75	5.24	0.99	2.59	21.65	21.83	32.6088	77.83	76.22	25.19	23.2	22.88	47.17	46.06	0	0	0	1
PGAL8A_00044100	8685	23.342	3738	0.430397	0.1138	0.2147	0.1754	876	557	902	PF3D7_0704000	conserved Plasmodium membrane protein, unknown function		9.05	5.29	5.99	0.99	2.43	10.18	2.57	10.1809	55.6	48.97	27.54	23.2	21.5	26.35	17.31	0	0	0	1
PGAL8A_00044200	10095	84.315	2220	0.219911	0.1407	0.1817	0.3406	562	749	164	PF3D7_0704100	conserved Plasmodium membrane protein, unknown function		3.48	0.82	21.04	34.95	7.61	187.47	62.75	187.465	29.7	20.93	56.78	82.46	49.82	89.2	70.24	1	1	0	0
PGAL8A_00044300	3144	19.336	1980	0.629771	0.072	0.0897	0.0573	1754	1753	2958	PF3D7_0704200	tRNA m5C-methyltransferase, putative		9.88	13.59	6.96	1.07	1.07	6.68	6.64	13.5914	57.42	65.24	30.41	24.04	11.08	19.46	25.75	0	0	0	1
PGAL8A_00044400	6858	134.527	1125	0.164042	0.2665	0.2595	0.4504	92	401	69	PF3D7_0704300	conserved Plasmodium membrane protein, unknown function		3.12	2.28	29.87	19.99	4.87	11.4	29.95	29.9508	25.45	35.35	65.15	74.62	38.36	29.02	53.55	0	0	0	1
PGAL8A_00044500	2448	50.46	1524	0.622549	0.0557	0.049	0.0712	2290	2573	2605	PF3D7_0704400	phosphoinositide-binding protein, putative		4.51	3.24	26.02	14.15	2.72	25.5	4.15	26.0194	38.15	40.96	61.59	69.1	24.13	51.41	21.09	0	0	0	1
PGAL8A_00044600	3549	54.44	1329	0.374472	0.1262	0.2195	0.1944	739	536	733	PF3D7_0704500	serine/threonine protein kinase, putative		3.08	0.59	40.89	32.68	4.94	17.97	16.28	40.8889	24.94	16.36	72.1	81.72	38.67	41.46	39.95	1	0	0	0
PGAL8A_00044700	10077	182.146	4380	0.434653	0.0414	0.071	0.0842	2813	2119	2321	PF3D7_0704600	E3 ubiquitin-protein ligase	PfUT	74.31	66.8	64.89	35.52	24.98	55.19	181.69	181.689	88.09	87.54	81.05	82.67	72.48	70.28	88.13	1	0	1	0
PGAL8A_00044800	3837	29.237	1743	0.454261	0.1547	0.1158	0.1717	439	1373	937	PF3D7_0704700	phosphopantetheine adenylyltransferase, putative		8.56	4.7	12.03	7.18	1.51	10.67	17.43	17.4281	54.25	47.14	42.29	56.48	14.07	27.44	41.34	0	0	0	1
PGAL8A_00044900	4026	83.182	1641	0.407601	0.0497	0.1872	0.1584	2490	708	1080	PF3D7_0704800	conserved Plasmodium protein, unknown function		3.3	1.45	38.02	60.08	2.51	13.92	28.74	60.0804	27.64	28.67	70.54	87.71	22.3	34.34	52.57	1	0	0	0
PGAL8A_00045000	1029	15.771	873	0.848397	0.0127	0.0421	0.0404	3904	2709	3390	PF3D7_0704900	peptide chain release factor 2	RF2Api	3.36	3.68	12.87	3.94	6.19	79.87	25.01	79.871	28.37	43.14	44.18	45.14	44.61	77.43	49.45	0	0	0	1
PGAL8A_00045100	3090	41.601	1548	0.500971	0.0557	0.1152	0.0512	2290	1381	3114	PF3D7_0705000	mRNA cap guanine-N7 methyltransferase, putative		37.83	15.96	20.36	3.07	4.38	11.82	12.68	37.8342	80.16	68.13	55.79	40.26	35.69	29.91	35.42	1	0	0	0
PGAL8A_00045200	2271	38.394	867	0.38177	0.1021	0.0785	0.2974	1078	1959	248	PF3D7_0705100	conserved Plasmodium protein, unknown function		2.92	0.59	18.48	11.38	4.33	22.1	23.55	23.5544	22.94	16.19	53.44	65.03	35.4	47.71	47.82	0	0	0	1
PGAL8A_00045300	3711	4.721	1263	0.34034	0.2341	0.1295	0.2686	140	1204	337	PF3D7_0705200	conserved Plasmodium protein, unknown function		1.59	1.64	2.02	0.77	2.13	7.59	0.61	7.588	6.8	30.6	15.48	20.48	18.83	21.15	13.09	0	0	0	1
PGAL8A_00045400	2319	128.031	1350	0.582147	0.031	0.0507	0.0578	3228	2540	2940	PF3D7_0705300	origin recognition complex subunit 2, putative		3.54	3.26	31.55	18.86	4.17	25.58	41.22	41.2174	30.32	41.11	66.33	73.57	34.5	51.46	61.23	0	0	0	1
PGAL8A_00045500	2469	211.655	2217	0.897934	0.0113	0.0105	0.0093	3950	3431	4119	PF3D7_0705400	DNA replication licensing factor MCM7	PfMCM7	6.94	6.72	214.27	92.96	11.68	11.36	57.87	214.27	49.98	52.88	92.57	90.79	59.41	28.9	68.46	1	0	0	0
PGAL8A_00045600	7200	139.803	2922	0.405833	0.0504	0.092	0.0611	2468	1705	2852	PF3D7_0705500	inositol-phosphate phosphatase, putative		84.96	28.94	62.48	41.38	8.23	27.15	85.16	85.1574	89.39	77.79	80.44	84.46	51.45	53.16	76.42	1	0	0	0
PGAL8A_00045700	3078	15.996	1551	0.503899	0.058	0.1372	0.126	2204	1126	1554	PF3D7_0705600	RNA helicase, putative		11.61	7.09	5.79	0.61	0.84	2.14	5.76	11.6089	60.31	53.82	26.8	18.61	9.66	11.55	24.07	0	0	0	1
PGAL8A_00045800	165	95.494	162	0.981818	0.001	0	0.001	4222	4212	4217	PF3D7_0705700	40S ribosomal protein S29, putative		894.57	1254.72	1054.32	329.54	954.41	289.64	203.51	1254.72	98.81	98.3	98.13	96.69	97.8	93.06	89.31	1	1	1	0
PGAL8A_00046000	264	117.669	216	0.818182	0.0129	0.6492	0.0352	3896	59	3535	PF3D7_0705900	ATP synthase subunit C, putative		43.55	40.67	594.43	608.35	3351.36	1138.47	103.33	3351.36	82.26	82.22	96.87	97.89	99.12	98.04	79.8	1	1	0	0
PGAL8A_00046100	3561	108.516	2697	0.757372	0.0275	0.0112	0.0269	3359	3421	3752	PF3D7_0706000	importin-7, putative		55.56	33.63	71.07	29.31	10.46	45.71	20.85	71.0734	85.48	79.78	82.26	80.3	56.95	66.45	45.02	1	0	0	0
PGAL8A_00046200	4596	17.422	2322	0.505222	0.0818	0.083	0.1001	1478	1874	2006	PF3D7_0706100	conserved Plasmodium protein, unknown function		3.05	4.85	20.73	11.46	2.16	8.11	13.11	20.7251	24.6	47.53	56.43	65.15	19.12	22.36	35.9	0	0	0	1
PGAL8A_00046300	249	11.247	90	0.361446	0.3761	0	0.0653	26	4212	2744	PF3D7_0706200	conserved Plasmodium protein, unknown function		4.46	5.08	21.45	2.51	86	181.03	17.94	181.031	37.77	48.33	57.37	36.91	87.71	88.9	41.96	0	1	0	0
PGAL8A_00046500	279	437.928	276	0.989247	0.0085	0.001	0.0156	4043	3526	4017	PF3D7_0706400	60S ribosomal protein L37		609.49	750	399.36	73.74	509.65	304.71	351.04	749.996	98.17	97.4	95.45	89.32	96.36	93.4	94.37	1	1	1	0
PGAL8A_00046600	4755	130.041	588	0.123659	0.0541	0.0144	0.0795	2345	3358	2423	PF3D7_0706500	conserved Plasmodium protein, unknown function		138.65	81.92	48.75	16.13	8.98	37.4	53.82	138.654	93.21	89.06	75.66	71.11	53.54	61.5	66.92	1	0	0	0
PGAL8A_00046700	1728	2.026	639	0.369792	0.3343	0.4476	0.621	44	135	32	PF3D7_0706600	conserved Plasmodium protein, unknown function		2.05	3.16	1.86	0	3.35	10.91	2.75	10.9137	11.32	40.4	14.87	5.14	28.91	27.89	17.81	0	0	0	1
PGAL8A_00047300	5112	35.884	1437	0.281103	0.1547	0.2457	0.1975	439	440	700	PF3D7_0707200	conserved Plasmodium protein, unknown function		2.7	1.43	20.17	9.66	3.1	13.71	23.65	23.6473	20.01	28.35	55.65	62.19	27.06	33.93	47.95	0	0	0	1
PGAL8A_00047400	2139	320.855	339	0.158485	0.0915	0.3632	0.1389	1259	215	1344	PF3D7_0707300	rhoptry-associated membrane antigen		13	2.7	471.15	695.23	35.3	29.05	473.95	695.226	62.26	38.1	96.12	98.15	77.48	55.15	96.45	1	0	1	0
PGAL8A_00047500	1863	46.827	1494	0.801932	0.0095	0.0239	0.013	4015	3166	4054	PF3D7_0707400	AAA family ATPase, putative		6.5	41.32	31.97	4.87	6.46	25.11	51.98	51.9758	48.43	82.38	66.61	48.75	45.9	51.1	66.02	1	0	0	0
PGAL8A_00047600	3870	7.395	1155	0.29845	0.2117	0.1638	0.1856	188	879	810	PF3D7_0707500	conserved Plasmodium protein, unknown function		6.99	3.4	5.15	0.8	1.12	3.57	5.53	6.9939	50.13	41.73	24.89	20.91	11.46	13.88	23.75	0	0	0	1
PGAL8A_00047700	705	61.626	330	0.468085	0.0612	0.0236	0.0673	2095	3175	2691	PF3D7_0707600	conserved Plasmodium protein, unknown function		16.47	8.74	11.64	3.2	62.54	434.57	3.81	434.567	66.51	57.3	41.39	41.04	84.47	95.43	20.27	0	1	0	0
PGAL8A_00047800	2166	119.918	879	0.405817	0.0116	0.001	0.0284	3941	3526	3705	PF3D7_0707700	E3 ubiquitin-protein ligase, putative		82.25	76.32	96.63	88.8	75.52	96.37	69.81	96.6333	89.11	88.51	86.34	90.6	86.67	80.46	72.68	1	1	0	0
PGAL8A_00047900	3360	16.04	1533	0.45625	0.0542	0.0616	0.1615	2341	2304	1045	PF3D7_0707800	RAP protein, putative		3.44	5.71	23.21	7.2	5.02	16.73	81.93	81.9312	29.2	50.28	59.2	56.55	39.19	39.69	75.7	0	0	0	1
PGAL8A_00048000	780	51.475	729	0.934615	0.0067	0.001	0.0128	4103	3526	4058	PF3D7_0707900	ribosomal protein S8e, putative		47.38	50.12	35.76	6.41	32.43	77.92	57.4	77.9222	83.38	84.92	69.03	54.28	76.47	77.01	68.2	1	0	0	0
PGAL8A_00048100	2397	13.022	1380	0.57572	0.1	0.1505	0.1007	1104	996	1993	PF3D7_0708000	cytoskeleton associated protein, putative		5.89	10.04	17.08	3.38	5.4	30.3	54.21	54.205	45.73	59.89	51.5	41.91	41.06	56.31	67.09	0	0	0	1
PGAL8A_00048300	210	29.443	204	0.971429	0.001	0.001	0.001	4222	3526	4217	PF3D7_0708100	DNA-directed RNA polymerases I, II, and III subunit RPABC5, putative		95.44	88.73	72.49	5.6	129.87	281.12	66.63	281.117	90.5	89.65	82.57	51.61	90.79	92.87	71.55	1	1	0	0
PGAL8A_00048400	2568	27.974	1347	0.524533	0.0693	0.1052	0.1084	1828	1511	1834	PF3D7_0708200	conserved Plasmodium protein, unknown function		4.19	1	1.06	0	3.22	7.07	1.47	7.0714	35.8	23.32	11.22	5.14	27.92	20.1	14.87	0	0	0	1
PGAL8A_00048500	702	45.563	648	0.923077	0.0638	0.0885	0.0412	2003	1775	3361	PF3D7_0708300	EKC/KEOPS complex subunit BUD32		21.48	5.29	6.2	0	36.66	12.92	8.11	36.6568	71.16	48.9	28.18	5.14	77.94	32.13	28.29	0	0	0	1
PGAL8A_00048600	2196	11476	1911	0.870219	0.0068	0.001	0.0027	4099	3526	4204	PF3D7_0708400	heat shock protein 90	HSP86	603.1	2649.98	1422	249	114.69	75.8	1069.67	2649.98	98.15	99.26	98.51	95.71	89.99	76.39	98.81	1	1	1	0
PGAL8A_00048700	2526	59.537	678	0.268409	0.0505	0.001	0.0643	2463	3526	2765	PF3D7_0708500	heat shock protein 86 family protein		25.04	31.93	17.85	4.18	11.64	15.4	66.41	66.4064	73.79	79.07	52.48	46.24	59.32	37.18	71.39	0	0	0	1
PGAL8A_00048800	768	24.818	360	0.46875	0.035	1.1724	0.1571	3072	10	1096	PF3D7_0708600	inner membrane complex protein 1d, putative		3.16	1.04	1.73	0.39	10.87	196.3	811.09	811.092	25.93	23.97	14.49	15.47	57.69	89.7	98.29	0	1	1	0
PGAL8A_00048900	678	266.578	522	0.769912	0.0264	0.001	0.1058	3415	3526	1891	PF3D7_0708700	Cg8 protein		14.13	18.93	171.29	57.33	101.17	85.23	87.57	171.29	63.82	71.25	91.36	87.31	89.01	78.36	77.1	1	1	0	0
PGAL8A_00049000	2598	763.401	1965	0.756351	0.0163	0.0145	0.0241	3789	3355	3840	PF3D7_0708800	heat shock protein 110	HSP70-z	263.44	281.96	177.73	31.39	46.05	46.51	201.17	281.964	95.88	95.12	91.54	81.27	80.79	66.89	89.18	1	1	1	0
PGAL8A_00049100	879	34.097	558	0.634812	0.0126	0.0166	0.061	3909	3322	2856	PF3D7_0708900	Cg3 protein // protein SCO1, putative		27.36	4.74	12.51	3.08	17.98	111.57	42.53	111.569	75.21	47.24	43.41	40.31	67.75	82.81	61.95	0	1	0	0
PGAL8A_00049200	1275	45.723	957	0.750588	0.0809	0.0776	0.0873	1499	1975	2249	PF3D7_0709000	chloroquine resistance transporter		182.9	145.83	63.25	13.14	34.93	39.31	46.09	182.904	94.34	92.73	80.54	67.61	77.34	62.66	63.84	1	0	0	0
PGAL8A_00049300	2841	74.038	1734	0.610348	0.0635	0.069	0.1353	2014	2157	1398	PF3D7_0709100	Cg1 protein		8.13	9.12	263.89	102.28	20.78	54.74	27.26	263.893	53.38	58.11	93.68	91.26	69.85	70.16	51.48	1	0	0	0
PGAL8A_00049400	888	80.862	453	0.510135	0.2444	0.1875	0.3433	118	706	160	PF3D7_0709200	glutaredoxin-like protein // Cg6 protein		12.11	4.16	14.87	3.23	10.2	31.96	29.04	31.9571	61.1	45.06	47.97	41.25	56.36	57.75	52.78	0	0	0	1
PGAL8A_00049500	7554	60.106	2868	0.379666	0.1242	0.1627	0.1689	765	892	965	PF3D7_0709300	Cg2 protein		9.87	9.67	11.62	3.88	2.81	10.38	7.35	11.6151	57.38	59.23	41.27	44.76	24.77	26.83	27.09	0	0	0	1
PGAL8A_00049600	3015	50.841	1305	0.432836	0.0566	0.1165	0.124	2261	1365	1592	PF3D7_0709400	Cg7 protein		2.88	3.09	28.09	11.16	4.86	18.4	42.93	42.9271	22.4	40.06	63.63	64.64	38.31	42.29	62.23	0	0	0	1
PGAL8A_00049700	402	30.174	255	0.634328	0.1148	0.001	0.1816	864	3526	856	PF3D7_0709500	conserved Plasmodium protein, unknown function		5.12	2.33	19.16	4.32	26.41	72.7	30.86	72.7025	41.92	35.76	54.3	46.84	73.39	75.51	54.16	0	0	0	1
PGAL8A_00049800	3549	24.269	1866	0.525782	0.0843	0.0927	0.1363	1422	1697	1375	PF3D7_0709600	ribonucleases P/MRP protein subunit POP1, putative		17.86	21.82	8.2	1.78	3.01	4.97	3.63	21.8158	67.99	73.71	33.39	31	26.43	16.51	20.05	0	0	0	1
PGAL8A_00049900	1080	321.265	918	0.85	0.1501	0.0975	0.0781	479	1616	2450	PF3D7_0709700	prodrug activation and resistance esterase		12.16	18.05	116.56	227.27	99.14	769.1	109.96	769.102	61.17	70.39	88.18	95.26	88.82	97.28	81.08	1	1	1	0
PGAL8A_00050000	195	29.65	189	0.969231	0.0474	0.001	0.023	2592	3526	3861	PF3D7_0709800	conserved protein, unknown function		10.71	3.66	11.39	1.51	23.12	57.17	100.45	100.451	58.63	43.02	40.64	28.88	71.33	71.04	79.54	0	0	0	1
PGAL8A_00050100	6078	49.739	2547	0.419052	0.0353	0.0838	0.0447	3057	1855	3271	PF3D7_0709900	conserved protein, unknown function		3.87	0.35	6.91	4.66	2.2	16.81	40.56	40.5633	33.11	9.5	30.28	47.83	19.51	39.85	60.74	0	0	0	1
PGAL8A_00050200	8922	34.387	3168	0.355077	0.1617	0.2391	0.1906	385	456	767	PF3D7_0710000	conserved Plasmodium protein, unknown function		4.39	2.26	29.48	25.75	3.8	10.52	32.25	32.2525	37.32	35.17	64.88	78.43	32.3	27.19	55.13	0	0	0	1
PGAL8A_00050300	1311	27.71	513	0.391304	0.0116	0.0659	0.118	3941	2214	1682	PF3D7_0710100	conserved Plasmodium protein, unknown function		12.63	5.8	14.19	3.62	2.55	74.11	15.21	74.1074	61.85	50.53	46.48	43.26	22.57	75.85	38.53	0	0	0	1
PGAL8A_00050400	5373	55.046	1596	0.297041	0.25	0.1203	0.2774	107	1319	308	PF3D7_0710200	conserved Plasmodium protein, unknown function		4.22	12.13	15.65	21.44	7.38	50.32	152.04	152.041	35.99	63.11	49.18	75.82	49.14	68.39	85.74	0	0	1	0
PGAL8A_00050500	1053	17.115	420	0.39886	0.0472	0.1216	0.1117	2606	1304	1786	PF3D7_0710400	DNA repair protein RAD14, putative	XPA	8.08	10.33	8.92	2.41	8.91	41.41	2.55	41.4055	53.23	60.45	35.05	36.05	53.37	64.13	17.27	0	0	0	1
PGAL8A_00050600	750	9.859	378	0.504	0.005	0.001	0.0366	4152	3526	3486	PF3D7_0710500	conserved Plasmodium protein, unknown function		6.52	9.29	12.22	1.91	50.55	157.02	27.33	157.017	48.55	58.54	42.77	32.14	81.98	87.33	51.51	0	1	0	0
PGAL8A_00050700	441	133.98	270	0.612245	0.0144	0.1516	0.0461	3853	986	3235	PF3D7_0710600	60S ribosomal protein L34		519.64	1554.84	819.82	248.49	1452.19	332.54	185.32	1554.84	97.87	98.65	97.51	95.69	98.37	94.05	88.28	1	1	1	0
PGAL8A_00050800	630	29.705	72	0.114286	0.2203	0.001	0.004	165	3526	4193	PF3D7_0710700	conserved Plasmodium protein, unknown function		63.74	63.85	29.6	2.91	6.71	83.02	147.76	147.763	86.78	87.1	65	39.34	46.77	78.07	85.34	1	0	1	0
PGAL8A_00050900	1167	34.385	309	0.264781	0.1084	0.2486	0.0482	969	431	3174	PF3D7_0710800	conserved Plasmodium protein, unknown function		19.11	10.94	24.74	5.46	7.1	131.56	12.37	131.563	69.02	61.49	60.53	51.01	48.26	85.23	34.97	0	1	0	0
PGAL8A_00051000	1059	39.095	726	0.685552	0.0294	0.2677	0.0411	3289	382	3364	PF3D7_0710900	50S ribosomal protein L1, mitochondrial, putative		11.31	5.22	10.42	2.2	3.39	39.1	15.16	39.0978	59.72	48.61	38.68	34.52	29.24	62.52	38.46	0	0	0	1
PGAL8A_00051200	456	6.193	327	0.717105	0.1626	0.5506	0.1484	379	86	1207	PF3D7_0711100	conserved Plasmodium membrane protein, unknown function		29.39	7.22	6.34	3.29	7.39	19.01	0	29.3865	76.44	54.16	28.53	41.55	49.18	43.5	6.4	0	0	0	1
PGAL8A_00051300	2562	23.259	1305	0.509368	0.1351	0.174	0.1576	622	806	1091	PF3D7_0711200	conserved Plasmodium protein, unknown function		4.94	1.87	2.88	2.64	6.92	19.14	1.86	19.142	40.85	32.34	18.54	37.75	47.55	43.6	15.82	0	0	0	1
PGAL8A_00051500	2082	58.749	390	0.18732	0.0212	0.1813	0.004	3606	751	4193	PF3D7_0711400	histone deacetylase complex subunit SAP18, putative		7.06	15.34	21.18	2.28	3.47	14.45	8.96	21.1841	50.42	67.39	56.97	35.05	29.84	35.24	29.72	0	0	0	1
PGAL8A_00051600	2322	242.637	1305	0.562016	0.0547	0.0386	0.0517	2321	2797	3103	PF3D7_0711500	regulator of chromosome condensation, putative		16.11	41.85	55.14	8.53	9.26	22.28	32.49	55.1392	66.04	82.57	78.09	59.75	54.06	48	55.32	1	0	0	0
PGAL8A_00518000	1071	17.885	603	0.563025	0.0423	0.001	0.044	2778	3526	3294	PF3D7_0713400	serpentine receptor, putative	PfSR25	41.79	25.32	47.35	20.8	68.19	98.38	13.03	98.3808	81.6	76.06	74.99	75.26	85.58	80.84	35.81	1	1	0	0
PGAL8A_00518100	2940	10.569	1305	0.443878	0.1756	0.3322	0.3233	313	247	186	PF3D7_0713500	conserved Plasmodium protein, unknown function		9.4	4.26	6.86	1.95	1.84	10.25	1.95	10.2519	56.48	45.4	30.07	32.49	16.79	26.55	16.02	0	0	0	1
PGAL8A_00518200	2550	32.595	1584	0.621176	0.0337	0.0317	0.0502	3142	2970	3134	PF3D7_0713600	mitochondrial ribosomal protein S5 precursor, putative		8.91	3.69	10.25	4.16	1.76	5.67	4.06	10.249	55.29	43.15	38.36	46.1	16.13	17.66	20.84	0	0	0	1
PGAL8A_00518300	627	28.267	483	0.770335	0.0641	0.1366	0.4043	1992	1134	101	PF3D7_0713700	conserved Plasmodium protein, unknown function		62.3	18.5	77.07	27.52	148.37	476.99	26.65	476.99	86.62	70.8	83.43	79.37	91.67	95.91	50.95	1	1	0	0
PGAL8A_00518400	768	12.742	498	0.648438	0.0645	0.001	0.1042	1980	3526	1927	PF3D7_0713800	negative elongation factor A, putative		8.66	1.97	14	12.6	5.48	19.98	29.03	29.0276	54.61	32.96	46.22	66.75	41.32	44.68	52.76	0	0	0	1
PGAL8A_00518500	8760	158.672	2826	0.322603	0.0763	0.0931	0.2168	1618	1690	582	PF3D7_0713900	conserved Plasmodium protein, unknown function		50.41	62.86	29.29	8.12	3.63	9.71	13.46	62.8553	84.25	86.93	64.74	58.84	31.18	25.53	36.28	1	0	0	0
PGAL8A_00518600	372	2982.83	366	0.983871	0.001	0.001	0.001	4222	3526	4217	PF3D7_0714000	histone H2B variant	H2Bv	237.96	273.68	1866.14	3028.39	530.05	278.04	387.39	3028.39	95.41	95.05	98.93	99.26	96.47	92.78	95.12	1	1	1	0
PGAL8A_00518800	1860	7.976	1017	0.546774	0.0517	0.0251	0.0632	2415	3139	2801	PF3D7_0714100	MAATS1 domain-containing protein, putative		3.62	0.43	0.28	0	0.91	3.74	10.24	10.2425	31.05	11.89	5.85	5.14	10.06	14.26	32.04	0	0	0	1
PGAL8A_00518900	3807	66.217	897	0.235619	0.0588	0.0799	0.2918	2184	1934	260	PF3D7_0714200	conserved Plasmodium protein, unknown function		19.57	20.47	32.87	17.48	5.06	20.12	37.67	37.6663	69.34	72.68	67.08	72.46	39.47	44.88	58.96	0	0	0	1
PGAL8A_00519000	2571	68.405	1215	0.472579	0.0679	0.0592	0.0983	1866	2349	2041	PF3D7_0714300	palmitoyltransferase DHHC4, putative	ERF2	15.48	12.32	16.66	3.93	4.38	44.48	16.23	44.4843	65.37	63.25	50.87	45.08	35.71	65.95	39.86	0	0	0	1
PGAL8A_00519100	729	13.607	339	0.465021	0.0204	0.168	0.041	3639	847	3370	PF3D7_0714400	calmodulin, putative		3.79	3.6	3.42	0.38	3	16.97	36.29	36.2939	32.47	42.58	19.98	15.35	26.29	40.18	58.08	0	0	0	1
PGAL8A_00519200	1158	61.165	720	0.621762	0.0284	0.0938	0.0852	3327	1679	2297	PF3D7_0714500	transcription elongation factor s-II, putative		21.02	21.26	29.06	6.55	2.63	8.8	77.34	77.3448	70.66	73.33	64.5	54.7	23.25	23.84	74.61	0	0	0	1
PGAL8A_00519300	1830	35.3	495	0.270492	0.0321	0.1031	0.1602	3197	1538	1060	PF3D7_0714600	conserved Plasmodium protein, unknown function		26.4	22.21	17.05	4.08	2.61	9.82	14.57	26.399	74.52	74.1	51.46	45.7	23.06	25.76	37.86	0	0	0	1
PGAL8A_00519700	969	65.124	804	0.829721	0.0298	0.0459	0.0922	3262	2624	2152	PF3D7_0715000	4-nitrophenylphosphatase	PfPNPase	23.38	11.62	14.78	3.94	8.51	10.1	7.22	23.3769	72.49	62.44	47.67	45.18	52.25	26.24	26.87	0	0	0	1
PGAL8A_00519800	303	5.374	210	0.693069	0.1345	0.1575	0.1454	630	936	1247	PF3D7_0715100	C-Myc-binding protein, putative		4.15	1.7	3.77	5.39	166.47	106.72	111.25	166.469	35.42	31.08	21.07	50.73	92.42	81.95	81.25	0	1	1	0
PGAL8A_00519900	4134	16.323	1164	0.281567	0.1864	0.4669	0.2976	269	126	247	PF3D7_0715200	conserved Plasmodium protein, unknown function		2.66	0.53	27.42	12.96	17.9	134.8	611.34	611.342	19.53	14.58	63.01	67.28	67.7	85.62	97.33	0	1	1	0
PGAL8A_00520000	1338	38.427	669	0.5	0.0469	0.0647	0.032	2620	2232	3624	PF3D7_0715300	calcium/calmodulin-dependent protein kinase, putative		2.69	0.1	26.37	11.73	18.97	39.61	10.8	39.6105	19.92	3.19	62.09	65.59	68.67	62.89	32.78	0	0	0	1
PGAL8A_00520100	672	19.046	390	0.580357	0.1253	0.0834	0.1956	750	1864	723	PF3D7_0715400	secreted ookinete protein, putative		2.37	0.72	17.46	1.34	23.16	745.83	245.91	745.826	15.63	19.05	51.88	27.08	71.35	97.16	91.05	0	1	1	0
PGAL8A_00520200	216	48.255	198	0.916667	0.0076	0.2044	0.0663	4068	607	2726	PF3D7_0715500	ATP synthase subunit epsilon, mitochondrial, putative		2.9	1.47	96.77	8.16	668.48	109.95	64.77	668.478	22.68	29.05	86.38	58.99	97.11	82.57	70.95	1	1	0	0
PGAL8A_00520300	2304	52.067	1695	0.735677	0.0285	0.0287	0.0528	3323	3066	3074	PF3D7_0715600	GTP-binding translation elongation factor tu family protein, putative		2.58	2.87	64.82	14.66	8.06	8.73	16.68	64.8154	18.33	38.95	81.03	69.76	51	23.66	40.44	1	0	0	0
PGAL8A_00520400	360	7.604	315	0.875	0.001	0.001	0.0348	4222	3526	3549	PF3D7_0715700	conserved Plasmodium protein, unknown function		2.03	1.54	9.6	0	18.02	55.2	62.18	62.1837	10.99	29.77	36.84	5.14	67.82	70.3	70.03	0	0	0	1
PGAL8A_00520500	1290	16.196	759	0.588372	0.1594	0.0836	0.0408	398	1859	3376	PF3D7_0715800	drug/metabolite transporter, putative		2.08	6.87	37.27	8.56	12.56	108.6	52.53	108.599	11.58	53.23	70.09	59.86	60.76	82.29	66.33	0	1	0	0
PGAL8A_00520600	1560	60.168	864	0.553846	0.0293	0.0111	0.0473	3299	3425	3204	PF3D7_0715900	cation diffusion facilitator family protein, putative		5.06	4.79	136.36	38.52	6.84	17.11	21.77	136.363	41.65	47.43	89.48	83.47	47.14	40.37	46.02	1	0	0	0
PGAL8A_00063100	3072	71.402	1005	0.327148	0.0145	0.0099	0.0298	3849	3454	3676	PF3D7_0716000	RNA-binding protein, putative		83.75	87.06	58.37	9.14	40.14	32.91	84.91	87.0604	89.27	89.49	79.25	61.19	79.02	58.46	76.39	1	0	0	0
PGAL8A_00063200	2838	26.338	1095	0.385835	0.0339	0.0367	0.0867	3128	2844	2265	PF3D7_0716100	protein SDA1, putative		46.86	43.18	9.1	1.65	5.04	18.93	40.54	46.8608	83.14	83.11	35.45	30.05	39.35	43.41	60.69	1	0	0	0
PGAL8A_00063300	1425	13.304	636	0.446316	0.064	0.0135	0.0912	1998	3379	2180	PF3D7_0716200	conserved Plasmodium protein, unknown function		99.71	65.62	42.64	9.53	9.81	73.04	169.64	169.643	90.91	87.36	72.94	61.94	55.36	75.61	87.33	1	0	1	0
PGAL8A_00063400	1299	338.712	729	0.561201	0.0244	0.1963	0.0262	3495	662	3779	PF3D7_0716300	conserved Plasmodium protein, unknown function		17.17	82.42	486.98	306.65	17.31	77.1	212.23	486.979	67.34	89.13	96.24	96.45	67.15	76.8	89.67	1	0	1	0
PGAL8A_00063500	486	65.845	273	0.561728	0.0193	0.001	0.0096	3682	3526	4115	PF3D7_0716400	transcription initiation factor IIA subunit 1, putative		18.09	3.93	87.31	38.63	180.98	88.26	162.57	180.98	68.22	44.14	84.97	83.5	92.85	78.86	86.71	1	1	1	0
PGAL8A_00063600	1356	17.97	669	0.493363	0.0886	0.5532	0.1601	1320	85	1062	PF3D7_0716500	conserved Plasmodium protein, unknown function		3.11	3.07	18.78	2.19	6.4	19.08	56.34	56.3409	25.41	39.97	53.89	34.46	45.63	43.55	67.87	0	0	0	1
PGAL8A_00063700	1656	17.899	1095	0.661232	0.0706	0.0912	0.129	1800	1726	1503	PF3D7_0716600	cysteine desulfurase		2.93	3	8.83	2.15	20.1	82.35	16.2	82.346	23.04	39.62	34.85	34.22	69.48	77.96	39.83	0	0	0	1
PGAL8A_00063800	2913	10.94	1212	0.416066	0.1403	0.1577	0.2139	568	934	596	PF3D7_0716700	conserved Plasmodium protein, unknown function		2.66	2.39	6.14	1.95	2.11	12.14	15.76	15.7622	19.49	36.06	27.99	32.47	18.68	30.6	39.24	0	0	0	1
PGAL8A_00063900	984	99.01	978	0.993902	0.0043	0.001	0.0241	4169	3526	3840	PF3D7_0716800	eukaryotic translation initiation factor 3 subunit I, putative		281.66	351.33	317.12	40.92	68.73	86.1	240.3	351.33	96.09	95.69	94.37	84.21	85.7	78.52	90.88	1	1	1	0
PGAL8A_00064000	969	3.97	609	0.628483	0.0418	0.001	0.0206	2797	3526	3919	PF3D7_0716900	drug/metabolite transporter, putative		24.02	26.92	37.03	5.46	10.1	215.58	134.28	215.582	72.96	76.82	69.95	51.04	56.12	90.51	83.83	0	1	1	0
PGAL8A_00064100	900	12.989	369	0.41	0.2299	0	0.1468	150	4212	1231	PF3D7_0717000	conserved Plasmodium membrane protein, unknown function		1.98	1.15	29.36	6.88	42.54	69.92	68.63	69.9198	10.54	25.35	64.8	55.63	79.75	74.88	72.32	0	0	0	1
PGAL8A_00064200	2379	41.713	1191	0.500631	0.0635	0.0979	0.0846	2014	1613	2309	PF3D7_0717100	conserved Plasmodium protein, unknown function		4.88	21.05	44.86	28.87	3.77	10.09	25.03	44.8558	40.38	73.03	74.05	80.08	32.06	26.21	49.47	1	0	0	0
PGAL8A_00064300	981	186.365	414	0.422018	0.0324	0.0402	0.0745	3189	2754	2526	PF3D7_0717200	conserved Plasmodium protein, unknown function		15.22	27.35	63.12	147.86	25.63	38.67	267.74	267.735	65.03	77.08	80.49	93.23	72.82	62.18	91.97	1	0	1	0
PGAL8A_00064400	1167	87.98	753	0.645244	0.0103	0.1084	0.0454	3988	1469	3256	PF3D7_0717300	transcription initiation factor IIE subunit alpha, putative		17.62	40.69	60.44	34.9	37.31	56.73	359.57	359.574	67.8	82.24	79.87	82.41	78.22	70.92	94.51	1	0	1	0
PGAL8A_00064500	2148	22.849	1134	0.527933	0.0436	0.0357	0.0715	2727	2871	2598	PF3D7_0717400	queuine tRNA-ribosyltransferase, putative		60.01	61.61	27.83	9.25	2.88	8.46	60.16	61.6122	86.24	86.72	63.46	61.42	25.39	23.07	69.33	1	0	0	0
PGAL8A_00064600	1587	233.223	1464	0.922495	0.0055	0.003	0.0088	4136	3523	4125	PF3D7_0717500	calcium-dependent protein kinase 4	PfCDPK4	50.65	37.57	236.61	294.65	17.12	20.1	181.61	294.652	84.28	81.44	93.2	96.26	66.94	44.87	88.11	1	0	1	0
PGAL8A_00064700	2577	65.938	1338	0.519208	0.0754	0.1774	0.1351	1651	777	1403	PF3D7_0717600	conserved Plasmodium protein, unknown function		3.17	0.63	32.32	29.19	4.59	133.36	530.54	530.538	26	17.03	66.83	80.21	36.97	85.42	96.9	1	1	1	0
PGAL8A_00064800	1527	58.96	1305	0.854617	0.037	0.0174	0.0322	2981	3305	3620	PF3D7_0717700	serine--tRNA ligase, putative		189.64	58.64	142.94	54.97	16.36	42.78	64.77	189.638	94.46	86.39	89.96	86.95	66.07	65.14	70.95	1	0	0	0
PGAL8A_00064900	3729	7.504	1320	0.353982	0.2041	0.1946	0.2129	207	668	603	PF3D7_0717800	conserved Plasmodium protein, unknown function		4.3	4.07	3.44	1.28	2.63	20.7	318.33	318.331	36.54	44.63	20.1	26.42	23.28	45.68	93.73	0	0	1	0
PGAL8A_00065000	1293	57.809	954	0.737819	0.0708	0.1208	0.1122	1794	1312	1774	PF3D7_0717900	thioredoxin-like protein		8.81	27.37	19.81	2.61	6.92	21.4	48.71	48.7105	55.04	77.1	55.17	37.55	47.6	46.85	65.12	0	0	0	1
PGAL8A_00065100	15357	13.212	9153	0.596015	0.049	0.0372	0.0372	2522	2833	3474	PF3D7_0718000	dynein heavy chain, putative		2.09	0.54	1.01	0.27	2.07	11.93	4.23	11.9257	11.7	14.94	10.85	13.47	18.33	30.1	21.26	0	0	0	1
PGAL8A_00065200	7182	45.815	3255	0.453216	0.0778	0.2293	0.3885	1577	506	114	PF3D7_0718100	exported serine/threonine protein kinase	FEST	2.9	0.83	13.68	3.56	2.8	13.29	12.63	13.6846	22.8	21.05	45.66	42.91	24.72	32.96	35.35	0	0	0	1
PGAL8A_00081500	7662	0.518	6120	0.798747	0.0778	0.1131	0.2099	1577	1409	627	PF3D7_0718300	cysteine repeat modular protein 2	PfCRMP2	0.98	0.17	0.27	0.08	0.12	0.98	0	0.9847	3.55	4.18	5.71	10.54	4.33	8.74	6.4	0	0	0	1
PGAL8A_00081600	390	34.794	384	0.984615	0.001	0.0372	0.0206	4222	2833	3919	PF3D7_0718400	mitochondrial ribosomal protein S8 precursor, putative		39.61	158.18	554.09	399.42	765	55.18	147.09	765	80.86	93.16	96.62	97.07	97.4	70.26	85.23	1	1	1	0
PGAL8A_00081700	570	122.938	507	0.889474	0.0402	0.1045	0.0345	2861	1521	3554	PF3D7_0718500	prefoldin subunit 3, putative		21.45	54.09	100.63	40.1	420.89	130.42	142.57	420.889	71.13	85.63	86.62	84.04	95.76	85.1	84.82	1	1	1	0
PGAL8A_00081800	4083	23.382	1110	0.271859	0.1285	0.2625	0.3074	703	394	223	PF3D7_0718600	conserved Plasmodium protein, unknown function		3.81	2.04	5.73	5.8	2.83	3.33	108.33	108.334	32.57	33.39	26.69	52.48	24.93	13.61	80.86	0	0	1	0
PGAL8A_00081900	1365	12.471	648	0.474725	0.136	0.1637	0.1768	613	882	895	PF3D7_0718700	conserved Plasmodium membrane protein, unknown function		1.82	1.27	4.31	1.5	4.64	7.69	6.11	7.69	8.93	26.71	22.55	28.65	37.15	21.45	24.77	0	0	0	1
PGAL8A_00082000	822	1.723	540	0.656934	0.0331	0.0337	0.0601	3163	2928	2881	PF3D7_0718800	conserved Plasmodium protein, unknown function		2.92	0.29	1.7	0	10.84	34.67	127.66	127.658	23.01	7.51	14.32	5.14	57.64	59.7	83.14	0	0	1	0
PGAL8A_00082200	570	14.67	291	0.510526	0.0159	0.046	0.1569	3804	2622	1097	PF3D7_0719000	conserved Plasmodium protein, unknown function		5.42	5.66	8.02	0	42.85	74.7	21.2	74.6958	43.71	50.16	32.98	5.14	79.84	76.18	45.51	0	0	0	1
PGAL8A_00082300	540	61.315	420	0.777778	0.0402	0.2139	0.0405	2861	558	3386	PF3D7_0719100	conserved Plasmodium protein, unknown function		17.2	6.46	25.45	9.25	126.67	433.88	316.1	433.882	67.37	52.15	61.21	61.43	90.55	95.41	93.68	0	1	1	0
PGAL8A_00082400	933	72.063	930	0.996785	0.0291	0.001	0.0078	3309	3526	4138	PF3D7_0719200	NIMA related kinase 4		2.8	2.46	3.62	0.32	32.41	206.96	155.96	206.965	21.27	36.65	20.62	14.21	76.44	90.31	86.08	0	1	1	0
PGAL8A_00082500	2622	188.336	1500	0.572082	0.0285	0.0319	0.0472	3323	2968	3208	PF3D7_0719300	actin-related protein, putative		42.71	35.26	39.91	6.45	7.81	21.86	333.19	333.192	81.96	80.61	71.47	54.35	50.37	47.41	94.01	1	0	1	0
PGAL8A_00082600	3855	32.074	1374	0.35642	0.1049	0.0989	0.1541	1027	1602	1129	PF3D7_0719400	conserved Plasmodium protein, unknown function		4.18	3.51	30.38	26.92	18.5	123.78	67.59	123.783	35.69	42.2	65.67	79.04	68.22	84.46	71.94	0	1	0	0
PGAL8A_00082700	1656	26.497	747	0.451087	0.0631	0.0495	0.0497	2027	2563	3143	PF3D7_0719500	LEM3/CDC50 family protein, putative		5.46	5.21	40.16	39.44	22.06	70.92	63.24	70.9226	43.88	48.55	71.72	83.8	70.75	75.06	70.43	1	0	0	0
PGAL8A_00082800	522	1711.02	450	0.862069	0.002	0.001	0.0022	4212	3526	4206	PF3D7_0719600	60S ribosomal protein L11a, putative		547.14	1849.21	948.55	467.33	442.83	163.79	278.75	1849.21	97.92	98.94	97.87	97.47	95.97	87.85	92.56	1	1	1	0
PGAL8A_00082900	414	513.961	405	0.978261	0.0616	0.177	0.0093	2077	783	4119	PF3D7_0719700	40S ribosomal protein S10, putative		547.16	1476.46	971.39	334.38	1003.02	608.08	686.05	1476.46	97.94	98.56	97.94	96.71	97.89	96.61	97.8	1	1	1	0
PGAL8A_00083000	1353	46.513	867	0.640798	0.0468	0.0946	0.0635	2625	1667	2793	PF3D7_0719800	conserved Plasmodium protein, unknown function		8.05	9.37	18.31	18.99	5.01	31.67	13.35	31.6717	53.11	58.73	53.18	73.72	39.1	57.56	36.18	0	0	0	1
PGAL8A_00083100	7932	37.16	2775	0.349849	0.0491	0.0887	0.0974	2519	1769	2057	PF3D7_0719900	conserved Plasmodium membrane protein, unknown function		25.5	24.57	45.52	46.85	9.64	22.99	17.41	46.8541	74.09	75.66	74.28	85.68	55.05	48.83	41.28	1	0	0	0
PGAL8A_00083200	567	16.288	498	0.878307	0.0078	0.0534	0.0543	4058	2473	3034	PF3D7_0720000	exosome complex component CSL4, putative		52.37	55.69	46.32	30.49	68.83	78.8	23.79	78.8023	84.61	85.94	74.57	80.76	85.75	77.2	48.15	1	1	0	0
PGAL8A_00083300	1005	19.294	486	0.483582	0.1024	0.0889	0.0785	1074	1765	2441	PF3D7_0720100	small subunit rRNA processing protein, putative		47.84	22.82	24	5.74	28.64	218.11	83.8	218.108	83.51	74.64	59.96	52.22	74.69	90.74	76.2	1	1	0	0
PGAL8A_00083400	363	19.287	267	0.735537	0.1184	0.7011	0.0753	829	46	2506	PF3D7_0720200	conserved Plasmodium protein, unknown function		25.1	47.44	30.8	7.23	51.68	99.59	95.57	99.5853	73.83	84.09	65.84	56.71	82.3	81.01	78.64	1	1	0	0
PGAL8A_00083500	318	14.546	249	0.783019	0.1034	0.237	0.1317	1054	466	1457	PF3D7_0720300	conserved Plasmodium protein, unknown function		2.32	1.01	0.78	0	2.44	3.39	248.73	248.735	14.77	23.52	9.28	5.14	21.63	13.64	91.22	0	0	1	0
PGAL8A_00083600	1911	210.526	1473	0.770801	0.0436	0.0298	0.0717	2727	3035	2595	PF3D7_0720400	ferrodoxin reductase-like protein		10.71	26.39	27.86	5.79	6.9	10.5	88.49	88.4884	58.65	76.56	63.49	52.45	47.39	27.14	77.36	0	0	0	1
PGAL8A_00083700	402	24.695	255	0.634328	0.0617	0.001	0.0411	2068	3526	3364	PF3D7_0720500	conserved Plasmodium protein, unknown function		7.47	13.7	39.01	10.89	194.96	350.41	165.82	350.408	51.62	65.38	71.04	64.28	93.13	94.27	86.95	0	1	1	0
PGAL8A_00083800	696	242.493	612	0.87931	0.0292	0.2326	0.0306	3305	485	3653	PF3D7_0720600	conserved Plasmodium protein, unknown function		32.59	13.27	132.64	45.88	59.24	44.86	25.58	132.638	77.81	64.72	89.2	85.46	83.99	66.07	50.01	1	1	0	0
PGAL8A_00083900	5271	90.316	2391	0.453614	0.0411	0.056	0.0274	2830	2417	3736	PF3D7_0720700	phosphoinositide-binding protein, putative		122.77	29.24	66.2	88.52	32.24	39.77	281.94	281.936	92.38	77.91	81.36	90.55	76.39	62.99	92.71	1	0	1	0
PGAL8A_00084000	591	23.792	483	0.817259	0.06	0.0647	0.0733	2138	2232	2561	PF3D7_0720800	Ham1-like protein, putative		11.54	47.28	79.81	64	152.89	56.18	67.96	152.89	60.15	84.07	83.82	88.23	91.88	70.69	72.08	1	1	0	0
PGAL8A_00084100	618	41.318	366	0.592233	0.0424	0.1349	0.062	2774	1148	2829	PF3D7_0720900	conserved Plasmodium protein, unknown function		6.02	9.84	29.29	8.47	11.16	21.26	22.79	29.2864	46.44	59.53	64.72	59.6	58.33	46.6	47.12	0	0	0	1
PGAL8A_00084200	8178	22.158	2697	0.329787	0.135	0.169	0.1712	624	841	942	PF3D7_0721000	conserved Plasmodium membrane protein, unknown function		11.36	16.86	23.99	10.02	8.55	30.69	40.98	40.9765	59.81	69.21	59.94	63.04	52.4	56.64	60.95	0	0	0	1
PGAL8A_00084300	702	1414.82	468	0.666667	0.0406	0.0741	0.034	2850	2038	3563	PF3D7_0721100	conserved Plasmodium protein, unknown function		12.78	58.25	171.97	41.19	47.88	130.57	78.05	171.971	62.07	86.33	91.4	84.3	81.25	85.13	74.81	1	1	0	0
PGAL8A_00084400	2739	11.264	921	0.336254	0.0843	0.1594	0.1397	1422	920	1326	PF3D7_0721200	conserved Plasmodium protein, unknown function		6.32	2.86	6.39	4.32	6.73	11.66	9.3	11.6636	47.65	38.84	28.7	46.81	46.86	29.53	30.19	0	0	0	1
PGAL8A_00084500	2376	45.547	1257	0.52904	0.019	0.0249	0.038	3690	3143	3449	PF3D7_0721300	ATP-dependent RNA helicase DBP7, putative		40.05	46.16	13.08	2.5	6.23	24.49	42.49	46.1649	81.01	83.8	44.61	36.84	44.73	50.49	61.92	1	0	0	0
PGAL8A_00084600	663	18.272	510	0.769231	0.0441	0.0363	0.0426	2712	2855	3324	PF3D7_0721400	conserved Plasmodium protein, unknown function		16.51	17.7	106.91	37.37	96.5	272.78	6.51	272.776	66.52	70.05	87.24	83.17	88.61	92.56	25.53	1	1	0	0
PGAL8A_00084800	585	389.975	573	0.979487	0.0075	0.001	0.0037	4072	3526	4200	PF3D7_0721600	40S ribosomal protein S5, putative		1531.38	2226.76	1250.32	247.92	967.29	265.59	447.34	2226.76	99.34	99.12	98.37	95.67	97.82	92.42	96.05	1	1	1	0
PGAL8A_00084900	1392	144.111	1125	0.80819	0.3201	0.0446	0.1515	51	2654	1155	PF3D7_0721700	secreted ookinete protein, putative		6.99	1.19	4.22	0	23.97	85.68	750.39	750.39	50.11	25.83	22.24	5.14	71.72	78.47	98.01	0	0	1	0
PGAL8A_00085000	324	122.61	147	0.453704	0.0257	0.001	0.0575	3447	3526	2952	PF3D7_0721800	conserved Plasmodium protein, unknown function		105.04	269.74	593.21	587.82	893.81	227.7	200.5	893.81	91.4	94.96	96.85	97.78	97.63	91.07	89.15	1	1	1	0
PGAL8A_00085100	234	44.509	156	0.666667	0.0442	0.001	0.0109	2708	3526	4092	PF3D7_0721900	V-type ATPase V0 subunit e, putative		76.64	21.75	33.33	3.72	108.58	111.66	306.98	306.983	88.49	73.61	67.42	43.98	89.63	82.83	93.37	1	1	1	0
PGAL8A_00085200	522	16.908	195	0.373563	0.0499	0.0599	0.0447	2482	2334	3271	PF3D7_0722000	conserved Plasmodium protein, unknown function		13.72	10.74	11.04	5.58	10.13	104.16	219.92	219.918	63.18	61.12	40.07	51.5	56.21	81.67	89.96	0	1	1	0
PGAL8A_00184500	2286	145.991	504	0.220472	0.0271	0.0352	0.0489	3380	2878	3164	PF3D7_0722200	rhoptry-associated leucine zipper-like protein 1		6.96	1.2	136.93	245.84	22.04	10.86	121.26	245.84	50.03	25.97	89.54	95.59	70.69	27.7	82.67	1	0	1	0
PGAL8A_00184400	3462	58.04	975	0.281629	0.0569	0.061	0.0851	2251	2313	2299	PF3D7_0722300	ubiquitin carboxyl-terminal hydrolase, putative		17.94	11.38	9.38	3.05	3.99	13.59	6.87	17.939	68.15	62.13	36.4	40.11	33.58	33.63	26.28	0	0	0	1
PGAL8A_00184300	1179	182.957	1092	0.926209	0.0158	0.0153	0.0323	3807	3344	3613	PF3D7_0722400	Obg-like ATPase 1, putative		132.83	146.1	236.99	60.42	13.49	5.25	52.08	236.987	92.97	92.76	93.21	87.8	62.21	17	66.12	1	0	0	0
PGAL8A_00184200	819	139.771	339	0.413919	0.0156	0.1788	0.0389	3817	766	3430	PF3D7_0722500	pre-mRNA-splicing factor CWC15, putative		255.85	141.93	108.88	339.54	53.23	61.42	99.03	339.541	95.78	92.57	87.47	96.78	82.66	72.63	79.25	1	1	0	0
PGAL8A_00184100	1959	32.63	1116	0.569678	0.0229	0.043	0.0514	3546	2688	3112	PF3D7_0722600	U3 small nucleolar RNA-associated protein 7, putative		38.84	29.45	33.21	9.26	3.71	22.08	41.77	41.7651	80.49	78.09	67.35	61.47	31.61	47.64	61.57	1	0	0	0
PGAL8A_00184000	240	281.455	234	0.975	0.001	0.001	0.0216	4222	3526	3895	PF3D7_0722700	conserved Plasmodium protein, unknown function		27.4	58.48	255.1	269.42	978.28	184.58	87.45	978.279	75.29	86.34	93.58	96.04	97.84	89.04	77.06	1	1	0	0
PGAL8A_00183900	1812	30.302	1038	0.572848	0.05	0.0799	0.1107	2480	1934	1799	PF3D7_0722800	conserved Plasmodium protein, unknown function		4.8	0.87	1.7	0.68	6.76	204.46	215.5	215.499	39.96	21.55	14.35	19.54	47	90.17	89.77	0	1	1	0
PGAL8A_00183800	954	23.845	747	0.783019	0.1567	0.3063	0.0998	420	289	2012	PF3D7_0722900	conserved Plasmodium protein, unknown function		2.78	0.25	8.59	3.76	16.75	110.05	105.79	110.047	21.08	6.34	34.29	44.11	66.54	82.62	80.3	0	1	1	0
PGAL8A_00183700	954	66.098	612	0.641509	0.04	0.0317	0.0622	2873	2970	2823	PF3D7_0723000	tRNAHis guanylyltransferase, putative		12.18	3	7.13	0.98	3.05	14.97	82.39	82.3934	61.21	39.61	30.78	23.07	26.76	36.32	75.78	0	0	0	1
PGAL8A_00183600	1377	20.263	867	0.62963	0.0614	0.1193	0.3154	2083	1331	203	PF3D7_0723100	conserved Plasmodium protein, unknown function		1.43	0.06	1.13	1.48	3.57	97.5	21.2	97.4962	5.75	2.58	11.48	28.5	30.64	80.66	45.51	0	1	0	0
PGAL8A_00183500	1065	8.723	855	0.802817	0.0349	0.063	0.1147	3078	2267	1736	PF3D7_0723200	conserved Plasmodium protein, unknown function		2.81	0.88	3.36	1.64	8.68	23.76	40.27	40.2721	21.48	21.76	19.8	29.93	52.73	49.82	60.55	0	0	0	1
PGAL8A_00183200	684	20.667	513	0.75	0.0849	0.0929	0.117	1409	1693	1700	PF3D7_0723500	dynactin subunit 5, putative		7.05	1.63	3.75	0	11.79	40.71	8.22	40.7105	50.41	30.59	20.96	5.14	59.51	63.63	28.44	0	0	0	1
PGAL8A_00183100	414	13.548	363	0.876812	0.0328	0.0931	0.0771	3172	1690	2465	PF3D7_0723600	proteasome assembly chaperone 4, putative		45	69.78	45.72	8.49	138.07	76.69	31.09	138.074	82.74	87.78	74.37	59.68	91.07	76.61	54.32	1	1	0	0
PGAL8A_00183000	2697	22.651	1332	0.493882	0.0476	0.0797	0.1188	2582	1940	1672	PF3D7_0723700	metallo-hydrolase/oxidoreductase, putative		15.53	49.66	45.65	11.57	7.84	9.79	37.02	49.6624	65.45	84.77	74.33	65.31	50.53	25.65	58.49	1	0	0	0
PGAL8A_00182900	6372	271.698	1536	0.241055	0.0561	0.0821	0.0613	2277	1881	2843	PF3D7_0723800	conserved Plasmodium protein, unknown function		5.86	12.21	70.96	97.25	14.79	35.14	79.4	97.2548	45.63	63.18	82.21	91.09	64.12	60	75.18	1	0	0	0
PGAL8A_00182800	3798	146.346	1419	0.373618	0.0499	0.085	0.0979	2482	1833	2046	PF3D7_0723900	RNA-binding protein, putative		44.67	61.51	61.12	24.59	16.28	19.58	17.54	61.5051	82.59	86.67	79.95	77.72	65.92	44.16	41.53	1	0	0	0
PGAL8A_00182700	4926	15.821	1374	0.278928	0.1236	0.1247	0.2824	773	1257	294	PF3D7_0724000	Rab GTPase activator and protein kinase, putative		3.66	1.61	5.62	2.23	3.43	21.3	17.34	21.3024	31.52	30.38	26.22	34.67	29.53	46.67	41.2	0	0	0	1
PGAL8A_00182600	3156	83.645	309	0.0979087	0.0075	0.0441	0.0499	4072	2669	3142	PF3D7_0724100	conserved Plasmodium protein, unknown function		19.58	61.92	34.29	7.42	4.97	27.97	104.52	104.517	69.38	86.79	68.24	57.37	38.9	54.18	79.99	1	0	0	0
PGAL8A_00182500	1119	83.993	570	0.509383	0.0356	0.0334	0.073	3044	2936	2575	PF3D7_0724200	type 2A phosphatase-associated protein 42, putative		17.07	14.82	16.41	2.52	5.74	17.29	8.72	17.2885	67.25	66.85	50.42	36.99	42.53	40.59	29.31	0	0	0	1
PGAL8A_00182400	1053	12.513	645	0.612536	0.0845	0.1864	0.1628	1418	713	1035	PF3D7_0724300	3-demethylubiquinone-9 3-methyltransferase, putative		2.8	1.74	11.05	1.17	18.16	43.21	8.35	43.2116	21.41	31.37	40.16	25.01	67.94	65.47	28.77	0	0	0	1
PGAL8A_00182300	345	99.163	252	0.730435	0.0175	0.001	0.0175	3751	3526	3978	PF3D7_0724400	mitochondrial import inner membrane translocase subunit TIM14, putative	TIM14	19.8	33.27	30.98	10.13	71.1	100.28	56.29	100.279	69.59	79.61	66.04	63.15	86.12	81.13	67.86	0	1	0	0
PGAL8A_00182200	948	24.861	453	0.477848	0.1047	0.4459	0.125	1030	137	1571	PF3D7_0724500	conserved Plasmodium protein, unknown function		20.31	5.2	4.59	0.64	4.69	9.75	24.47	24.4657	70.11	48.5	23.28	19.09	37.34	25.58	48.9	0	0	0	1
PGAL8A_00182100	5202	31.857	1575	0.302768	0.0793	0.2369	0.0891	1539	467	2215	PF3D7_0724600	protein kinase, putative		3.24	2.07	18.36	8.78	2.85	12.12	7.31	18.3629	26.92	33.58	53.25	60.5	25.2	30.59	27.04	0	0	0	1
PGAL8A_00182000	10143	35.606	4254	0.419403	0.0642	0.0845	0.1242	1989	1843	1586	PF3D7_0724700	conserved Plasmodium protein, unknown function		21.18	19.39	14.96	5.19	6.88	16.74	14.03	21.1767	70.85	71.66	48.14	49.87	47.26	39.71	37.06	0	0	0	1
PGAL8A_00181900	1179	6.278	822	0.697201	0.0569	0.001	0.1505	2251	3526	1169	PF3D7_0724800	kelch domain-containing protein, putative		4.33	1.92	57.69	30.36	20.82	61.67	333.91	333.909	36.85	32.68	79.14	80.68	69.9	72.79	94.05	1	0	1	0
PGAL8A_00181800	6633	22.315	2259	0.34057	0.0756	0.1395	0.2176	1644	1103	576	PF3D7_0724900	kinesin-19, putative		3.65	0.45	9.29	6.71	3.36	114	1145.55	1145.55	31.31	12.52	36.04	55.18	29.01	83.16	98.94	0	1	1	0
PGAL8A_00181700	3369	79.764	1296	0.384684	0.0604	0.1231	0.1696	2126	1277	955	PF3D7_0725000	exonuclease I, putative		5.86	7.45	25.56	12.28	2.58	15.13	59.51	59.5081	45.61	54.73	61.29	66.44	22.85	36.7	68.98	0	0	0	1
PGAL8A_00181600	4011	5.88	1092	0.272251	0.1437	0.2766	0.2484	531	357	413	PF3D7_0725100	conserved Plasmodium membrane protein, unknown function		13.39	12.72	12.54	5.16	3.79	15.74	33.12	33.1225	62.89	63.96	43.48	49.77	32.16	37.63	55.7	0	0	0	1
PGAL8A_00181500	447	582.045	393	0.879195	0.0123	0.001	0.0277	3920	3526	3730	PF3D7_0725200	mago nashi protein homologue, putative		44.84	23.41	34.24	9.86	52.4	63.32	97.03	97.0316	82.62	74.91	68.2	62.8	82.46	73.38	78.81	1	1	0	0
PGAL8A_00181400	2280	32.422	1338	0.586842	0.0867	0.086	0.14	1376	1814	1319	PF3D7_0725300	conserved Plasmodium protein, unknown function		61.09	81.19	25.25	6.66	8.86	4.84	30.54	81.1884	86.39	88.94	60.96	55.03	53.19	16.24	53.89	1	0	0	0
PGAL8A_00181100	315	29.709	144	0.457143	0.1763	0	0.2751	310	4212	318	PF3D7_0725400	conserved Plasmodium protein, unknown function		9.49	2.64	164.08	433.74	95.97	24.97	856.44	856.439	56.66	37.74	91.03	97.3	88.56	51	98.44	1	1	1	0
PGAL8A_00098600	3798	63.091	2049	0.539494	0.0488	0.0336	0.0558	2531	2931	2992	PF3D7_0726300	DNA mismatch repair protein PMS1, putative		11.63	3.04	15.87	8.76	3.42	9.73	23.48	23.4765	60.33	39.8	49.6	60.45	29.41	25.55	47.74	0	0	0	1
PGAL8A_00098500	12543	19.399	4911	0.391533	0.1348	0.2298	0.233	627	502	481	PF3D7_0726400	conserved Plasmodium membrane protein, unknown function		7.52	5.16	15.56	6.14	3.74	24.89	6.22	24.8892	51.71	48.43	48.99	53.56	31.87	50.86	24.94	0	0	0	1
PGAL8A_00098400	8520	218.934	4083	0.479225	0.0204	0.0429	0.0441	3639	2692	3290	PF3D7_0726500	ubiquitin carboxyl-terminal hydrolase, putative		43.35	31.63	66.67	21.02	20.71	83.45	69.58	83.4496	82.21	78.86	81.41	75.47	69.83	78.17	72.58	1	0	0	0
PGAL8A_00098300	1947	35.284	651	0.334361	0.0884	0	0.1323	1327	4212	1443	PF3D7_0726600	conserved Plasmodium protein, unknown function		2.73	0.65	11.59	3.7	3.19	17.45	20.98	20.9836	20.46	17.47	41.19	43.83	27.71	40.75	45.28	0	0	0	1
PGAL8A_00098200	501	98.464	438	0.874251	0.0432	0.1627	0.0439	2741	892	3298	PF3D7_0726700	conserved Plasmodium protein, unknown function		3.87	4.33	30.96	3.44	126.91	228.64	117.28	228.642	33.04	45.66	66	42.26	90.57	91.14	82.12	0	1	1	0
PGAL8A_00098100	324	66.695	222	0.685185	0.0925	0	0.2623	1233	4212	357	PF3D7_0726800	dolichyl-diphosphooligosaccharide--protein glycosyltransferase subunit DAD1, putative		2.58	4.89	9.14	4.54	25.12	244.44	168.41	244.436	18.27	47.71	35.62	47.52	72.58	91.64	87.19	0	1	1	0
PGAL8A_00098000	1377	69.598	771	0.559913	0.0211	0.0104	0.0736	3611	3436	2550	PF3D7_0726900	mitochondrial import inner membrane translocase subunit TIM50, putative		5.42	14.03	16.46	2.26	2.96	25.48	10.76	25.4769	43.67	65.84	50.5	34.85	26.03	51.39	32.63	0	0	0	1
PGAL8A_00097900	2877	24.748	1155	0.40146	0.0873	0.1343	0.1722	1360	1155	933	PF3D7_0727000	vacuolar protein sorting-associated protein 53, putative		5.89	9.16	33.52	31.17	31.05	24.89	36.09	36.0911	45.82	58.21	67.65	81.15	75.85	50.89	57.9	1	0	0	0
PGAL8A_00097700	1575	43.777	1341	0.851429	0.043	0.0774	0.0845	2749	1981	2311	PF3D7_0727200	cysteine desulfurase, putative	IscS	32.79	24.81	17.13	2.3	4.43	12.83	44.62	44.6173	77.93	75.84	51.51	35.2	36	31.94	63.03	0	0	0	1
PGAL8A_00097600	2217	22.397	1125	0.507442	0.0715	0.0629	0.1429	1769	2269	1278	PF3D7_0727300	DNA (cytosine-5)-methyltransferase		8.91	12.52	11.25	4.71	2.59	17.64	20.45	20.4493	55.32	63.63	40.45	48.14	22.92	41.08	44.54	0	0	0	1
PGAL8A_00097500	771	252.543	765	0.992218	0.0167	0.0323	0.0328	3775	2957	3599	PF3D7_0727400	proteasome subunit alpha type-5, putative		126.73	107.26	495.67	300.77	141.35	50.17	63.51	495.666	92.7	90.93	96.28	96.33	91.34	68.31	70.56	1	1	0	0
PGAL8A_00097400	2040	73.274	900	0.441176	0.0659	0.0997	0.0963	1940	1588	2080	PF3D7_0727500	mTERF domain-containing protein, putative		2.21	1.79	14.03	4.84	4.66	11.73	3.95	14.025	13.26	31.71	46.32	48.68	37.25	29.74	20.56	0	0	0	1
PGAL8A_00097300	2901	12.265	1386	0.477766	0.1302	0.1917	0.2246	675	682	537	PF3D7_0727600	conserved Plasmodium protein, unknown function		2.7	3.44	3.04	0.67	1.53	2.64	0.91	3.4385	20.13	41.98	18.9	19.39	14.3	12.41	13.61	0	0	0	1
PGAL8A_00097200	2244	12.455	1131	0.504011	0.059	0.3547	0.1965	2178	222	710	PF3D7_0727700	conserved Plasmodium protein, unknown function		1.96	3.65	6.62	1.23	4.25	13.61	23.39	23.3919	10.26	42.93	29.32	25.82	34.91	33.69	47.65	0	0	0	1
PGAL8A_00097100	4833	44.658	2787	0.57666	0.0564	0.0412	0.0571	2268	2729	2963	PF3D7_0727800	cation transporting ATPase, putative		14.32	33.1	43.25	16.85	6.04	25.66	25.76	43.2538	64.05	79.5	73.2	71.58	43.97	51.53	50.2	0	0	0	1
PGAL8A_00097000	5547	27.108	2271	0.40941	0.1483	0.1317	0.1673	489	1180	986	PF3D7_0727900	conserved Plasmodium protein, unknown function		19.59	4.78	6.83	3.31	2.67	19.87	3.88	19.8676	69.4	47.34	29.95	41.65	23.61	44.49	20.42	0	0	0	1
PGAL8A_00096900	999	449.388	798	0.798799	0.0097	0.001	0.0294	4011	3526	3684	PF3D7_0728000	eukaryotic translation initiation factor 2 subunit alpha, putative		297.35	179.01	352.02	118.46	29.55	31.53	79.14	352.022	96.3	93.44	94.89	92.11	75.26	57.43	75.09	1	0	0	0
PGAL8A_00096800	13479	34.956	5109	0.379034	0.1185	0.1752	0.1623	827	797	1040	PF3D7_0728100	conserved Plasmodium membrane protein, unknown function		2.06	0.73	9.14	3.05	4.84	28.79	6.79	28.7917	11.42	19.16	35.57	40.12	38.19	54.99	26.08	0	0	0	1
PGAL8A_00096700	1515	8.536	939	0.619802	0.0885	0.0767	0.1472	1323	1997	1223	PF3D7_0728200	actin-like protein, putative		2.52	0.67	9.97	2.66	3.84	12.04	10.12	12.0367	17.48	18	37.67	37.84	32.7	30.36	31.73	0	0	0	1
PGAL8A_00096600	645	194.271	543	0.84186	0.0396	0.0244	0.0445	2885	3150	3278	PF3D7_0728300	conserved Plasmodium protein, unknown function		4.43	3.12	20.96	15.71	194.18	273.59	63.8	273.587	37.63	40.16	56.69	70.57	93.11	92.59	70.69	0	1	0	0
PGAL8A_00096400	390	10.307	276	0.707692	0.0335	0.1886	0.11	3151	699	1809	PF3D7_0728500	conserved Plasmodium protein, unknown function		1.69	0.92	2.1	0.68	32.58	161.56	19.43	161.561	7.48	22.23	15.86	19.57	76.56	87.61	43.43	0	1	0	0
PGAL8A_00096300	5592	48.61	1626	0.290773	0.1026	0.111	0.081	1068	1433	2386	PF3D7_0728600	RING zinc finger protein, putative		4.17	2.22	28.61	16.85	13.37	44.8	131.74	131.742	35.57	34.85	64.13	71.59	62.09	66.06	83.59	0	0	1	0
PGAL8A_00096200	2466	1.991	972	0.394161	0.1322	0.0563	0.093	654	2412	2133	PF3D7_0728700	alpha/beta hydrolase, putative		2.61	0.44	3.01	1.49	5.85	59.38	78.27	78.2686	18.68	12.36	18.78	28.61	43.03	71.85	74.87	0	0	0	1
PGAL8A_00096100	1149	32.363	771	0.671018	0.1305	0.2712	0.231	671	374	487	PF3D7_0728800	conserved Plasmodium protein, unknown function		4.77	4.64	24.2	3.15	5.73	31.07	18.97	31.0668	39.73	46.94	60.1	40.75	42.48	57.02	42.89	0	0	0	1
PGAL8A_00096000	1506	43.224	789	0.523904	0.0511	0.1599	0.1049	2441	918	1915	PF3D7_0728900	RNA-binding protein, putative		65.5	22.41	32.99	11.53	21.64	72.95	87.03	87.0319	87	74.23	67.16	65.22	70.42	75.58	76.94	1	0	0	0
PGAL8A_00095900	300	27.192	282	0.94	0.1109	0.1049	0.3285	915	1515	183	PF3D7_0729000	signal recognition particle subunit SRP9		5.69	8.89	13.19	4.71	32.43	78.92	22.42	78.9164	44.85	57.66	44.82	48.11	76.47	77.24	46.66	0	0	0	1
PGAL8A_00095800	7446	56.332	2700	0.362611	0.0842	0.156	0.1593	1426	948	1070	PF3D7_0729100	conserved Plasmodium protein, unknown function		3.95	4.04	19.13	3.95	5.79	19.64	28.01	28.0079	33.79	44.49	54.23	45.2	42.82	44.23	52.02	0	0	0	1
PGAL8A_00095700	714	4.715	591	0.827731	0.0552	0.2759	0.1263	2304	360	1549	PF3D7_0729200	1-cys peroxiredoxin	prx	3.03	1.1	15.93	3.66	28.44	74.55	0	74.5461	24.47	24.63	49.73	43.6	74.55	76.11	6.4	0	0	0	1
PGAL8A_00095600	2259	19.455	1398	0.618858	0.0596	0.085	0.0353	2155	1833	3531	PF3D7_0729300	60S ribosomal export protein NMD3, putative		34.44	29.4	10.15	1.1	3.42	14.87	16.79	34.4437	78.71	78.02	38.13	24.32	29.5	36.11	40.57	0	0	0	1
PGAL8A_00095500	1287	29.589	663	0.515152	0.0184	0.001	0.0386	3716	3526	3436	PF3D7_0729400	ribosome biogenesis protein BRX1, putative		57.08	136.53	44.14	7.52	11.6	16.43	40.26	136.525	85.75	92.31	73.81	57.61	59.27	38.93	60.52	1	0	0	0
PGAL8A_00095400	2298	19.697	1071	0.466057	0.0325	0.0289	0.0351	3186	3062	3537	PF3D7_0729500	mRNA (N6-adenosine)-methyltransferase, putative		20.16	23.65	20.98	4.12	2.75	9.26	12.26	23.6518	69.96	75.06	56.71	45.91	24.3	24.67	34.76	0	0	0	1
PGAL8A_00095200	2346	6.743	1725	0.735294	0.1192	0.113	0.129	818	1412	1503	PF3D7_0729700	conserved Plasmodium protein, unknown function		1.91	0.3	1.78	3.05	2.88	20.4	4.65	20.4013	9.74	7.67	14.58	40.16	25.38	45.16	22.05	0	0	0	1
PGAL8A_00095100	294	1.151	237	0.806122	0.0282	0.001	0.0669	3335	3526	2705	PF3D7_0729800	dynein light chain, putative		0.71	0	0	2	6.73	31.98	4.76	31.9825	2.84	1.22	1.45	32.92	46.88	57.8	22.49	0	0	0	1
PGAL8A_00095000	14730	12.35	12759	0.866191	0.0372	0.0347	0.0492	2971	2891	3154	PF3D7_0729900	dynein heavy chain, putative		2.31	0.52	1.33	0.85	1.03	10.24	20.35	20.3453	14.61	14.41	12.55	21.62	10.75	26.52	44.33	0	0	0	1
PGAL8A_00094900	330	17.878	189	0.572727	0.0616	0.225	0.1024	2077	522	1966	PF3D7_0730000	conserved Plasmodium protein, unknown function		2.68	5.87	7.97	0.84	10.97	20.99	75.74	75.7365	19.71	50.76	32.8	21.46	57.97	46.08	74.19	0	0	0	1
PGAL8A_00094800	2565	6.134	1524	0.594152	0.0834	0.1319	0.2215	1445	1174	547	PF3D7_0730100	tRNA pseudouridine synthase D, putative		3.28	4.35	2.43	0.9	1.31	5.35	10.2	10.1969	27.47	45.8	17.02	22.3	12.74	17.17	31.94	0	0	0	1
PGAL8A_00094700	2565	26.25	1929	0.752047	0.0363	0.0118	0.0323	3006	3407	3613	PF3D7_0730200	AP-4 complex subunit beta, putative		4.29	3.54	12.93	2.4	2.13	12	3.8	12.9327	36.52	42.37	44.3	35.85	18.87	30.26	20.25	0	0	0	1
PGAL8A_00094600	4437	38.162	1473	0.331981	0.0873	0.1274	0.1852	1360	1227	815	PF3D7_0730300	AP2 domain transcription factor AP2-L, putative	ApiAP2	127.48	153.32	63.92	7.72	2.81	8.98	38.86	153.324	92.78	93.04	80.73	58.01	24.79	24.02	59.76	1	0	0	0
PGAL8A_00094500	483	24.137	471	0.975155	0.0301	0.1317	0.0889	3251	1180	2219	PF3D7_0730400	IMP1-like protein, putative		13.35	2.83	52.96	44.98	69.39	239.6	58.66	239.598	62.85	38.79	77.36	85.27	85.86	91.41	68.76	1	1	0	0
PGAL8A_00077400	879	6.256	732	0.832765	0.1319	0.3044	0.2114	657	295	612	PF3D7_0801300	von Willebrand factor A domain-related protein		4.66	1.27	3.77	1.01	30.74	16.54	11553.7	11553.7	39.09	26.74	21.05	23.51	75.77	39.28	99.93	0	0	1	0
PGAL8A_00077700	1617	20.335	1194	0.738404	0.0257	0.0193	0.0361	3447	3276	3502	PF3D7_0801500	nucleolar protein 10, putative		32.14	25.76	11.62	1.25	2.4	17.51	25.44	32.1388	77.57	76.25	41.28	26.05	21.29	40.9	49.84	0	0	0	1
PGAL8A_00077800	372	168.494	261	0.701613	0.0105	0.001	0.0231	3981	3526	3858	PF3D7_0801600	conserved Plasmodium protein, unknown function		1.1	1.47	17.63	3.11	127.43	450.83	22.21	450.833	3.96	29.05	52.21	40.5	90.62	95.64	46.49	0	1	0	0
PGAL8A_00077900	4962	41.824	1509	0.304111	0.0518	0.2121	0.1242	2411	571	1586	PF3D7_0801700	sentrin-specific protease 2, putative		8.85	24.37	27.52	6.15	5.2	15.26	20.9	27.5224	55.13	75.58	63.15	53.57	40.21	36.94	45.14	0	0	0	1
PGAL8A_00078000	2313	43.72	1245	0.538262	0.0661	0.0131	0.0412	1931	3389	3361	PF3D7_0801800	mannose-6-phosphate isomerase, putative		96.69	481.65	184.61	53.15	19.05	33.75	59.91	481.648	90.65	96.31	91.73	86.72	68.72	59.08	69.17	1	0	0	0
PGAL8A_00078100	10176	37.731	2646	0.260024	0.0632	0.1469	0.1256	2022	1030	1563	PF3D7_0801900	conserved Plasmodium protein, unknown function		20.71	19.18	7.34	1.26	4.6	45	32.21	45.0001	70.38	71.49	31.26	26.17	36.99	66.11	55.12	0	0	0	1
PGAL8A_00078200	3513	67.941	2592	0.737831	0.0491	0.0593	0.0349	2519	2345	3545	PF3D7_0802000	glutamate dehydrogenase, putative	GDHc	103.17	531.03	350.84	58.31	22.6	22.88	269.89	531.027	91.17	96.47	94.86	87.45	71.02	48.69	92.09	1	0	1	0
PGAL8A_00078300	8124	94.107	1002	0.123338	0.1401	0.6267	0.2289	569	66	506	PF3D7_0802100	AP2 domain transcription factor, putative		4.48	1.86	61.37	64.07	13.01	32.31	107.28	107.278	37.89	32.13	80.04	88.25	61.55	58.04	80.61	1	0	1	0
PGAL8A_00078400	669	279.347	624	0.932735	0.0709	0.0274	0.0441	1792	3090	3290	PF3D7_0802200	1-cys peroxiredoxin	1-CysPrx	9.6	84.43	476.74	58.07	72.82	126.18	491.7	491.702	56.92	89.25	96.16	87.42	86.31	84.63	96.56	1	1	1	0
PGAL8A_00078500	3165	20.194	2538	0.801896	0.0268	0.054	0.039	3397	2459	3426	PF3D7_0802300	periodic tryptophan protein 2, putative	UTP1	59.14	56.89	26.35	4.02	10.88	9.39	31.59	59.1408	86.13	86.12	62.06	45.46	57.76	24.91	54.7	1	0	0	0
PGAL8A_00078600	3375	24.714	1005	0.297778	0.1606	0.0849	0.1422	392	1836	1291	PF3D7_0802400	conserved Plasmodium protein, unknown function		38.93	42.62	41.2	4.38	14.66	15.73	75.66	75.6641	80.54	82.9	72.36	47.07	63.94	37.61	74.17	1	0	0	0
PGAL8A_00078700	3690	27.379	2091	0.566667	0.0714	0.0413	0.0776	1774	2726	2457	PF3D7_0802500	inositol 5-phosphatase, putative		12.01	6.57	10.22	9.25	3.67	10.51	23.32	23.3188	60.91	52.47	38.29	61.4	31.4	27.18	47.57	0	0	0	1
PGAL8A_00078800	5289	27.927	2658	0.502552	0.0429	0.0294	0.0491	2754	3045	3156	PF3D7_0802600	adenylyl cyclase beta	PfACbeta	6.06	3.29	51.6	140.9	15.11	12	28.02	140.897	46.65	41.23	76.82	93.01	64.71	30.28	52.05	1	0	0	0
PGAL8A_00078900	1224	5.251	447	0.365196	0.2928	0.2413	0.4842	67	450	61	PF3D7_0802700	conserved Plasmodium protein, unknown function		3.05	0.26	1.33	0.48	1.16	12.81	19.29	19.2905	24.61	6.44	12.58	16.61	11.62	31.87	43.24	0	0	0	1
PGAL8A_00079000	1584	40.211	1377	0.869318	0.0125	0.001	0.0057	3913	3526	4171	PF3D7_0802800	serine/threonine protein phosphatase 2B catalytic subunit A	PfCNA	5.29	1	105.82	204.2	12.72	19.33	135.67	204.199	42.98	23.49	87.12	94.91	61.09	43.95	83.95	1	0	1	0
PGAL8A_00079100	396	35.24	318	0.80303	0.0442	0.0712	0.1227	2708	2113	1611	PF3D7_0802900	conserved Plasmodium protein, unknown function		5.63	1.36	7.87	0.72	141.24	234.5	34.29	234.501	44.63	27.7	32.49	20.01	91.33	91.31	56.63	0	1	0	0
PGAL8A_00079200	1956	48.337	933	0.476994	0.0415	0.0921	0.0973	2810	1703	2062	PF3D7_0803000	peptidyl-prolyl cis-trans isomerase		29.2	16.68	34.55	6.5	8.22	13.2	59.84	59.8449	76.27	68.98	68.43	54.56	51.41	32.82	69.14	0	0	0	1
PGAL8A_00079300	3138	34.424	849	0.270554	0.1164	0.0593	0.0694	850	2345	2636	PF3D7_0803100	U3 small nucleolar RNA-associated protein 14, putative		52.39	38.31	17.7	2.52	6.18	21.6	57.64	57.6422	84.63	81.72	52.24	36.96	44.56	47.07	68.35	1	0	0	0
PGAL8A_00079400	1545	43.813	810	0.524272	0.011	0.0876	0.0351	3962	1784	3537	PF3D7_0803200	filament assembling protein, putative		4.3	2.21	78.72	133.72	30.47	62.45	238.63	238.627	36.57	34.76	83.69	92.75	75.68	73.05	90.72	1	0	1	0
PGAL8A_00079500	1095	63.068	978	0.893151	0.0559	0.0158	0.1029	2283	3337	1956	PF3D7_0803300	mitogen-activated protein kinase organizer 1, putative // WD repeat domain-containing protein 83, putative	WDR83	2.85	2.53	22.56	6.69	6.91	55.71	21.66	55.7077	22.07	37.11	58.56	55.12	47.46	70.47	45.96	0	0	0	1
PGAL8A_00079600	3096	102.543	2166	0.699612	0.0179	0.0162	0.0267	3731	3330	3761	PF3D7_0803400	DNA repair and recombination protein RAD54, putative		9.23	13.51	229.35	289.17	20.52	49.93	1046.34	1046.34	56.05	65.15	93.02	96.19	69.76	68.22	98.77	1	0	1	0
PGAL8A_00079700	2976	32.481	1464	0.491935	0.0327	0.1012	0.0844	3179	1565	2317	PF3D7_0803500	AAA family ATPase, putative		8.84	13.56	19.21	9.81	5.32	14.66	3.81	19.2086	55.1	65.19	54.39	62.61	40.75	35.67	20.29	0	0	0	1
PGAL8A_00080000	1359	155.477	1320	0.971302	0.002	0.0133	0.0013	4212	3382	4216	PF3D7_0803700	tubulin gamma chain		9.68	10.15	57.04	16.22	41.67	53.07	62.8	62.8014	57	60.07	78.74	71.21	79.47	69.69	70.3	0	0	0	1
PGAL8A_00080100	771	111.62	726	0.941634	0.0305	0.001	0.0215	3240	3526	3897	PF3D7_0803800	proteasome subunit beta type-4		185.36	183.82	460.85	260.39	378.97	357.62	189.36	460.849	94.39	93.56	95.97	95.93	95.46	94.46	88.51	1	1	1	0
PGAL8A_00080300	1629	113.704	999	0.61326	0.0405	0.072	0.0419	2856	2089	3336	PF3D7_0804000	cactin homolog, putative		113.96	96.11	55.3	49.05	7.67	20.68	41.24	113.965	92	90.32	78.12	86.07	50.06	45.66	61.29	1	0	0	0
PGAL8A_00080400	2433	5.092	522	0.21455	0.1723	0.123	0.2399	332	1279	443	PF3D7_0804300	zinc finger protein, putative		87.95	41.53	16.87	2.42	6.46	21.03	20.41	87.9469	89.77	82.45	51.15	36.11	45.9	46.15	44.5	1	0	0	0
PGAL8A_00080500	1863	40.971	1338	0.718196	0.0389	0.034	0.0392	2906	2914	3421	PF3D7_0804400	methionine aminopeptidase 1c, putative	PfMetAP1c	9.02	3.53	24.62	14.15	4.16	18.88	16.99	24.6169	55.55	42.32	60.43	69.08	34.41	43.29	40.82	0	0	0	1
PGAL8A_00080600	13998	55.799	4752	0.339477	0.0698	0.0885	0.1312	1812	1775	1464	PF3D7_0804500	conserved Plasmodium membrane protein, unknown function		10.57	21.96	26.56	12.86	6.84	49.95	31.61	49.9541	58.4	73.91	62.32	67.09	47.12	68.24	54.73	0	0	0	1
PGAL8A_00080700	1728	25.513	807	0.467014	0.0338	0.0361	0.0468	3134	2862	3213	PF3D7_0804600	tRNA pseudouridine synthase, putative		23.36	13.33	12.61	1.58	2.9	16.01	21.77	23.3639	72.48	64.81	43.64	29.46	25.55	38.08	46.02	0	0	0	1
PGAL8A_00080900	648	464.036	510	0.787037	0.0065	0.001	0.0138	4112	3526	4042	PF3D7_0804800	peptidyl-prolyl cis-trans isomerase	PfCyP24	43.1	16.61	23.66	3.15	20.85	80.63	29.95	80.6324	82.12	68.89	59.58	40.72	69.95	77.58	53.55	1	0	0	0
PGAL8A_00081000	1263	119.249	702	0.555819	0.0224	0.1287	0.0474	3559	1212	3200	PF3D7_0804900	GTPase-activating protein, putative		36.07	26.65	62.11	25.09	6.93	22.53	190.53	190.532	79.4	76.7	80.23	78.01	47.64	48.19	88.64	1	0	1	0
PGAL8A_00081100	735	34.227	729	0.991837	0.0883	0.1017	0.1171	1329	1558	1698	PF3D7_0805000	alpha/beta hydrolase, putative		8.35	2.9	34.34	13.94	59.01	62.52	45.5	62.5229	53.83	39.14	68.25	68.77	83.97	73.1	63.53	0	1	0	0
PGAL8A_00081200	1518	52.334	813	0.535573	0.128	0.3225	0.1532	710	260	1137	PF3D7_0805100	conserved Plasmodium protein, unknown function		1.88	0.52	8.96	3.89	4.96	76.17	374.62	374.618	9.47	14.54	35.19	44.85	38.86	76.46	94.82	0	0	1	0
PGAL8A_00081300	282	30.238	273	0.968085	0.2743	0.001	0.1679	79	3526	981	PF3D7_0805200	gamete release protein, putative // IMC-associated apicomplexan protein, putative	IAAP	25.17	0.28	220.61	23.97	259.72	229.97	5998.41	5998.41	73.91	7.18	92.83	77.36	94.18	91.17	99.81	1	1	1	0
PGAL8A_00081400	3927	16.308	1263	0.32162	0.2491	0.3728	0.4473	111	203	73	PF3D7_0805300	conserved Plasmodium protein, unknown function		1.61	0.38	2.85	1.8	1.64	86.83	28.29	86.8279	6.96	10.47	18.42	31.19	15.34	78.66	52.29	0	0	0	1
PGAL8A_00107900	663	19.708	561	0.846154	0.0892	0.2741	0.1761	1308	363	898	PF3D7_0805400	acetyltransferase, putative		38.18	14.5	11.04	2.6	25.63	131.25	26.83	131.251	80.3	66.38	40.09	37.49	72.84	85.18	51.2	1	1	0	0
PGAL8A_00108000	3027	34.823	1986	0.656095	0.0907	0.0784	0.2107	1278	1960	618	PF3D7_0805500	conserved Plasmodium protein, unknown function		13.08	9.23	11.55	6.14	1.32	7.53	3.44	13.0845	62.42	58.33	41.04	53.54	12.77	20.99	19.61	0	0	0	1
PGAL8A_00108200	3657	124.031	1905	0.520919	0.0822	0.0668	0.0662	1468	2202	2729	PF3D7_0805700	serine/threonine protein kinase, FIKK family	TSTK0	3.01	1.16	28.8	19.62	3.77	10.46	47.66	47.6613	24.03	25.58	64.34	74.36	32.02	27.07	64.6	0	0	0	1
PGAL8A_00108300	2154	88.653	624	0.289694	0.1797	0.2052	0.1966	293	605	708	PF3D7_0805800	conserved Plasmodium protein, unknown function		1.59	0.12	0.31	0	6.79	200.01	27.75	200.011	6.82	3.44	6.13	5.14	47.07	89.94	51.74	0	1	0	0
PGAL8A_00108400	720	98.746	327	0.454167	0.0999	0.0993	0.0988	1107	1598	2027	PF3D7_0805900	conserved protein, unknown function		5.43	6.55	9.33	1.18	30.21	42.65	35.44	42.6521	43.78	52.4	36.15	25.14	75.64	65.03	57.47	0	0	0	1
PGAL8A_00108500	3405	10.066	1314	0.385903	0.1241	0.1649	0.1454	770	872	1247	PF3D7_0806000	AAA family ATPase, putative		9.09	8.52	9.2	1.7	1.96	9.8	11.53	11.5344	55.67	56.92	35.76	30.5	17.55	25.69	33.86	0	0	0	1
PGAL8A_00108600	1644	9.474	315	0.191606	0.0677	0.0778	0.3204	1877	1970	195	PF3D7_0806100	conserved Plasmodium protein, unknown function		5.4	9.23	10.51	3.48	5.75	27.01	40.7	40.7045	43.59	58.32	38.9	42.49	42.58	53.02	60.84	0	0	0	1
PGAL8A_00108700	2955	15.475	1701	0.575635	0.0738	0.0999	0.1199	1698	1585	1652	PF3D7_0806200	C-mannosyltransferase, putative		2.05	0.44	19.87	17.11	12.12	18.42	9.61	19.866	11.22	12.39	55.25	71.98	60.08	42.31	30.64	0	0	0	1
PGAL8A_00108800	4722	51.472	3930	0.832274	0.0172	0.0189	0.0251	3759	3286	3807	PF3D7_0806300	ferlin, putative		3.71	0.43	31.19	30.28	8.6	9.74	17.51	31.1949	32.04	12.17	66.19	80.64	52.54	25.57	41.46	1	0	0	0
PGAL8A_00108900	510	16.489	405	0.794118	0.0981	0.1457	0.1589	1138	1041	1074	PF3D7_0806400	glycosyltransferase family 28 protein, putative		3.52	0.59	14.02	6.05	52.51	82.05	5.24	82.0513	30.08	16.39	46.3	53.3	82.52	77.84	23.29	0	1	0	0
PGAL8A_00109000	1695	101.127	954	0.562832	0.0244	0.0523	0.0268	3495	2500	3757	PF3D7_0806500	DnaJ protein, putative		34.23	53.17	79.82	48.41	26.03	14.87	231.81	231.809	78.6	85.48	83.83	85.88	73.13	36.09	90.46	1	0	1	0
PGAL8A_00109100	2649	6.72	1164	0.439411	0.0766	0.0679	0.0923	1608	2181	2147	PF3D7_0806600	kinesin-like protein, putative		17.77	2.27	9.62	0.83	1.9	10.85	302.36	302.355	67.89	35.23	36.89	21.34	17.15	27.64	93.28	0	0	1	0
PGAL8A_00109200	6387	25.677	1953	0.305777	0.1014	0.1983	0.199	1084	653	692	PF3D7_0806700	conserved Plasmodium membrane protein, unknown function		16.08	5.55	13.06	5.14	4.53	18.84	15.04	18.8373	66.02	49.8	44.57	49.73	36.58	43.17	38.32	0	0	0	1
PGAL8A_00109400	2721	71.457	2061	0.757442	0.0131	0.0037	0.0096	3893	3516	4115	PF3D7_0806800	V-type proton ATPase subunit a, putative		178.24	135.04	161.41	103.36	16.03	27.74	211.51	211.507	94.2	92.26	90.91	91.36	65.76	53.9	89.6	1	0	1	0
PGAL8A_00109500	1056	13.878	636	0.602273	0.0949	0.0375	0.0647	1192	2824	2757	PF3D7_0806900	conserved Plasmodium protein, unknown function		5.95	6.19	12.7	3.09	4.73	25.25	88.37	88.3663	46.1	51.45	43.85	40.38	37.65	51.2	77.34	0	0	0	1
PGAL8A_00109600	666	22.82	657	0.986486	0.047	0.0317	0.0388	2617	2970	3433	PF3D7_0807000	YEATS domain-containing protein, putative		54.92	38.99	56.21	17.57	248.71	76.07	148.49	248.708	85.32	81.82	78.45	72.63	93.92	76.42	85.46	1	1	1	0
PGAL8A_00109700	4125	28.207	1173	0.284364	0.067	0.1679	0.1033	1897	850	1948	PF3D7_0807100	ATP-dependent RNA helicase DHH1, putative		9.32	15.13	14.52	5.85	10.34	49.47	14.46	49.4705	56.29	67.2	47.05	52.71	56.72	68.06	37.63	0	0	0	1
PGAL8A_00052900	816	15.463	573	0.702206	0.0587	0.1351	0.1298	2185	1145	1490	PF3D7_0807200	conserved Plasmodium membrane protein, unknown function		15.43	24.2	25.38	8.26	76.76	55.83	8.99	76.7585	65.35	75.44	61.09	59.15	86.84	70.52	29.77	0	1	0	0
PGAL8A_00052800	606	25.183	540	0.891089	0.0299	0.0319	0.0015	3257	2968	4213	PF3D7_0807300	ras-related protein Rab-18		133.67	152.17	213.87	65.96	386.35	74.38	39.25	386.349	93.04	92.99	92.5	88.42	95.52	76.01	59.94	1	1	0	0
PGAL8A_00052700	570	6.569	495	0.868421	0.0351	0.6062	0.1153	3067	70	1729	PF3D7_0807400	coenzyme Q-binding protein COQ10 homolog, mitochondrial		2.36	1.1	11.57	14.29	48.3	465.84	51.01	465.835	15.32	24.7	41.09	69.24	81.43	95.79	65.76	0	1	0	0
PGAL8A_00052600	783	737.649	654	0.835249	0.0026	0.0564	0.041	4202	2408	3370	PF3D7_0807500	proteasome subunit alpha type-6, putative		77.32	84.46	357.75	123.87	82.58	65.86	189.41	357.75	88.59	89.27	94.95	92.35	87.48	73.93	88.52	1	1	1	0
PGAL8A_00052500	3327	207.462	1083	0.325518	0.0769	0.0714	0.1024	1604	2106	1966	PF3D7_0807600	conserved Plasmodium protein, unknown function		105.8	76.84	70.62	17.25	9.86	13.34	41.22	105.796	91.47	88.56	82.12	72.15	55.5	33.1	61.24	1	0	0	0
PGAL8A_00052300	1281	401.687	735	0.57377	0.005	0.0221	0.0269	4152	3208	3752	PF3D7_0807800	26S proteasome regulatory subunit RPN10, putative		123.09	48.58	139.66	75.61	24.18	114.63	172.23	172.231	92.45	84.47	89.74	89.46	71.8	83.26	87.48	1	1	1	0
PGAL8A_00052200	1119	35.599	963	0.86059	0.0186	0.0458	0.017	3709	2628	3994	PF3D7_0807900	tyrosine--tRNA ligase		154.16	156.67	171.77	136.74	19.5	42.59	426.47	426.474	93.68	93.09	91.38	92.89	69.05	64.99	95.78	1	0	1	0
PGAL8A_00052100	3141	9.442	1596	0.508118	0.0803	0.2056	0.2542	1512	603	388	PF3D7_0808000	conserved Plasmodium protein, unknown function		3.19	3.63	2.94	0.72	3.23	8.8	1.71	8.7951	26.19	42.8	18.66	19.99	27.96	23.82	15.44	0	0	0	1
PGAL8A_00052000	4008	9.26	1974	0.492515	0.0799	0.2263	0.1637	1528	516	1026	PF3D7_0808100	AP-3 complex subunit delta, putative		3.52	6.42	13.2	4.75	2.53	10.74	2.03	13.204	30.14	52.07	44.83	48.29	22.42	27.54	16.17	0	0	0	1
PGAL8A_00051900	1581	25.45	1248	0.789374	0.0756	0.0219	0.0466	1644	3212	3220	PF3D7_0808200	plasmepsin X		4.49	1.43	38.71	31.23	5.81	22.97	494	494.003	38	28.39	70.94	81.2	42.89	48.8	96.59	1	0	1	0
PGAL8A_00051800	729	152.808	471	0.646091	0.0305	0.0472	0.0591	3240	2601	2911	PF3D7_0808300	ubiquitin regulatory protein, putative		21.55	9.95	93.42	63.54	89.72	220.64	318.07	318.074	71.23	59.72	85.93	88.19	87.99	90.81	93.72	1	1	1	0
PGAL8A_00051700	849	23.664	531	0.625442	0.0548	0.0791	0.0923	2318	1947	2147	PF3D7_0808400	coatomer subunit epsilon, putative		21.08	7.67	20.06	17.21	48.88	88.25	16.72	88.2506	70.75	55.24	55.48	72.08	81.55	78.85	40.49	0	1	0	0
PGAL8A_00526800	3411	22.17	1074	0.314864	0.0933	0.1332	0.1941	1220	1164	734	PF3D7_0809200	asparagine-rich antigen Pfa55-14		12.07	10.42	9.33	2.08	6.07	163.25	13.81	163.254	61.05	60.62	36.18	33.77	44.07	87.8	36.77	0	1	0	0
PGAL8A_00526700	2625	50.112	1203	0.458286	0.0795	0.0874	0.1577	1535	1788	1090	PF3D7_0809400	conserved Plasmodium protein, unknown function		2.29	3.85	11.41	6.1	2.76	20.81	20.28	20.8074	14.35	43.92	40.75	53.45	24.39	45.79	44.21	0	0	0	1
PGAL8A_00526600	297	14.753	249	0.838384	0.0138	0.1035	0.1354	3873	1533	1395	PF3D7_0809500	histone acetyltransferase subunit NuA4, putative		13.59	7.05	10.19	0	57.25	48.01	71.07	71.0671	63.06	53.7	38.2	5.14	83.59	67.68	73.07	0	1	0	0
PGAL8A_00526500	14772	24.634	6756	0.457352	0.1202	0.1334	0.1938	810	1163	737	PF3D7_0809600	peptidase family C50, putative // separase, putative		2.29	2.19	4.61	1.89	1.95	13.93	13.18	13.9308	14.42	34.46	23.33	31.97	17.45	34.36	35.99	0	0	0	1
PGAL8A_00526400	1545	36.076	1233	0.798058	0.0139	0.0116	0.0393	3869	3412	3416	PF3D7_0809700	RuvB-like helicase 1		2	0.3	3.58	1.88	185.47	115.42	64.45	185.465	10.78	7.92	20.5	31.83	92.95	83.31	70.8	0	1	0	0
PGAL8A_00526300	3000	4.945	1470	0.49	0.1455	0.2352	0.2759	516	477	317	PF3D7_0809800	conserved Plasmodium protein, unknown function		1.69	2.22	1.42	0.6	4.01	51.13	1.8	51.132	7.44	34.83	12.98	18.56	33.69	68.69	15.68	0	0	0	1
PGAL8A_00526000	324	27.432	165	0.509259	0.0638	0	0.0601	2003	4212	2881	PF3D7_0810100	apicoplast ribosomal protein L33 precursor, putative		6.83	8.97	19.84	1.75	35.67	85.69	33.31	85.6851	49.71	57.82	55.2	30.77	77.57	78.48	55.9	0	0	0	1
PGAL8A_00525900	2646	32.483	1674	0.632653	0.0577	0.0765	0.1543	2218	1999	1125	PF3D7_0810200	ABC1 family, putative	PfABCK1	2.77	5.11	10.7	0.83	2.18	16.17	28.75	28.7459	21.01	48.36	39.24	21.38	19.29	38.36	52.59	0	0	0	1
PGAL8A_00525800	1482	133.624	1119	0.755061	0.0233	0.0201	0.0436	3531	3260	3306	PF3D7_0810300	protein phosphatase PPM5, putative		10.74	24.75	218.8	152.38	37.46	96.17	569.64	569.641	58.72	75.78	92.75	93.37	78.24	80.44	97.16	1	1	1	0
PGAL8A_00525700	1878	44.447	891	0.474441	0.0759	0.0685	0.1101	1634	2163	1806	PF3D7_0810400	aquaporin, putative		4.49	10.68	12.03	6.16	8.92	156.37	16.99	156.372	38.05	61.04	42.32	53.64	53.42	87.26	40.8	0	1	0	0
PGAL8A_00525600	912	41.868	909	0.996711	0.0403	0.0466	0.0689	2860	2611	2650	PF3D7_0810500	protein phosphatase PPM7, putative		113.55	64.16	58.74	23.2	65.48	98.74	33.75	113.545	91.97	87.16	79.33	76.96	85.1	80.91	56.26	1	1	0	0
PGAL8A_00525500	2427	67.178	1464	0.603214	0.0169	0.0124	0.0251	3769	3401	3807	PF3D7_0810600	ATP-dependent RNA helicase DBP1, putative		111.48	92.51	81.33	11.02	6.38	33.48	80.7	111.48	91.9	89.94	84.14	64.5	45.56	58.91	75.42	1	0	0	0
PGAL8A_00525400	429	6.858	270	0.629371	0.2751	0.4365	0.4489	77	142	71	PF3D7_0810700	conserved Plasmodium protein, unknown function		13.97	6.7	13.14	1.38	24.27	14.34	3.28	24.2657	63.61	52.86	44.69	27.64	71.91	35.02	19.27	0	0	0	1
PGAL8A_00525300	1944	21.799	1500	0.771605	0.1087	0.1661	0.1558	959	865	1113	PF3D7_0810800	hydroxymethyldihydropterin pyrophosphokinase-dihydropteroate synthase		11.47	18.17	16.72	2.22	1.61	1.37	3.96	18.1685	60.01	70.47	50.96	34.62	15	9.9	20.6	0	0	0	1
PGAL8A_00525100	2433	25.462	1986	0.816276	0.0508	0.0476	0.0755	2454	2594	2503	PF3D7_0811000	cullin-1, putative		2.26	0.41	30.14	21.36	5.83	17.67	12.92	30.1402	13.99	11.63	65.45	75.78	42.96	41.13	35.71	0	0	0	1
PGAL8A_00525000	1773	15.826	1032	0.582064	0.0515	0.0767	0.1156	2424	1997	1722	PF3D7_0811100	mitochondrial carrier protein, putative		1.67	0.68	13.59	7.24	3.52	8	0	13.5883	7.39	18.37	45.56	56.78	30.17	22.17	6.4	0	0	0	1
PGAL8A_00524900	3141	27.922	1902	0.60554	0.0668	0.1202	0.1286	1904	1320	1509	PF3D7_0811200	ER membrane protein complex subunit 1, putative		23.9	20.35	24.21	10.11	7.24	15.61	1.23	24.2131	72.86	72.58	60.14	63.12	48.71	37.39	14.29	0	0	0	1
PGAL8A_00524800	4758	115.289	1101	0.2314	0.028	0.0327	0.038	3342	2949	3449	PF3D7_0811300	CCR4-associated factor 1 // poly(A) ribonuclease POP2	POP2	229.26	78.47	198.43	102.5	14.39	49.46	104.84	229.262	95.17	88.7	92.18	91.29	63.6	68.05	80.08	1	0	1	0
PGAL8A_00524700	1809	103.603	1269	0.701493	0.0256	0.0219	0.0286	3452	3212	3699	PF3D7_0811400	conserved protein, unknown function		162.5	141.57	137.78	54.37	27.75	15.49	56.67	162.496	93.87	92.54	89.63	86.88	74.17	37.27	67.98	1	0	0	0
PGAL8A_00524600	2460	31.961	1557	0.632927	0.1694	0.1226	0.1707	345	1285	946	PF3D7_0811500	histone-arginine methyltransferase CARM1, putative // coactivator-associated arginine methyltransferase 1, putative	PRMT4	28.32	13.37	6.31	1.5	1.32	4.49	3.06	28.317	75.92	64.88	28.46	28.75	12.88	15.73	18.61	0	0	0	1
PGAL8A_00524500	3615	121.137	2673	0.739419	0.1649	0.1965	0.125	369	660	1571	PF3D7_0811600	conserved Plasmodium protein, unknown function		2.53	2.97	46.84	34.38	10.29	21.27	5.78	46.8421	17.63	39.45	74.81	82.22	56.55	46.63	24.11	1	0	0	0
PGAL8A_00524400	3060	6.589	1539	0.502941	0.1113	0.0602	0.2477	908	2325	417	PF3D7_0811700	conserved Plasmodium protein, unknown function		1.45	0.5	2.65	4.17	1.38	4.25	0	4.2536	5.94	13.67	17.76	46.13	13.28	15.3	6.4	0	0	0	1
PGAL8A_00524300	1410	3.32	795	0.56383	0.2275	0.0727	0.2536	155	2072	392	PF3D7_0811800	conserved Plasmodium protein, unknown function		4.2	5.35	7.56	2.33	3.74	22.26	0	22.2558	35.88	49.13	31.76	35.37	31.85	47.95	6.4	0	0	0	1
PGAL8A_00524200	3318	86.155	1884	0.567812	0.061	0.0811	0.1054	2104	1902	1904	PF3D7_0811900	RNA-binding protein, putative		3.02	5.48	24.1	10.57	3.27	13.29	23.38	24.0976	24.16	49.59	60.03	63.89	28.28	32.94	47.64	0	0	0	1
PGAL8A_00524100	1419	25.407	933	0.657505	0.0234	0.0618	0.0422	3524	2302	3332	PF3D7_0812000	conserved Plasmodium protein, unknown function		3.91	2.31	4.06	0.82	2.14	11.78	22.35	22.3472	33.49	35.64	21.81	21.22	18.92	29.81	46.58	0	0	0	1
PGAL8A_00524000	6732	51.555	4290	0.637255	0.0724	0.105	0.0867	1742	1513	2265	PF3D7_0812100	conserved protein, unknown function		10	9.06	22.99	7.72	3.86	15.94	8.09	22.993	57.64	58.02	58.91	57.97	32.77	37.98	28.23	0	0	0	1
PGAL8A_00523800	1377	11.579	1011	0.734205	0.0783	0.1995	0.2039	1562	642	655	PF3D7_0812200	trypsin-like serine protease, putative		1.98	1.31	10.97	4.84	4.98	3.75	3.45	10.9721	10.5	27.04	39.9	48.64	39	14.28	19.7	0	0	0	1
PGAL8A_00523900	864	7.921	702	0.8125	0.056	0.1416	0.1199	2279	1080	1652	PF3D7_0812220	GTPase, putative		2.6	3.24	14.65	2.33	6.23	7.25	7.93	14.6481	18.59	40.91	47.33	35.37	44.76	20.51	28.01	0	0	0	1
PGAL8A_00523700	1296	3.181	915	0.706019	0.2425	0.1308	0.0874	123	1191	2246	PF3D7_0812300	sporozoite surface protein 3, putative		2.49	0.4	1.72	1.27	1.11	7.13	2.02	7.1338	17.02	11.08	14.47	26.29	11.35	20.27	16.15	0	0	0	1
PGAL8A_00523600	1635	243.403	1476	0.902752	0.004	0.0217	0.0039	4174	3219	4195	PF3D7_0812400	karyopherin alpha	PfKARalpha	80.49	127.5	308.77	83.97	18.8	29.83	156.31	308.767	88.96	91.93	94.25	90.08	68.46	55.86	86.13	1	0	1	0
PGAL8A_00523500	2994	55.938	444	0.148297	0.0513	0.001	0.0687	2428	3526	2655	PF3D7_0812500	RNA-binding protein, putative		68.1	35.5	33.92	6.95	11.58	16.48	26.26	68.1044	87.36	80.7	68.05	55.86	59.22	39.03	50.56	1	0	0	0
PGAL8A_00523400	492	37.845	453	0.920732	0.0073	0.001	0.001	4082	3526	4217	PF3D7_0812600	ubiquitin-conjugating enzyme E2, putative		21	24.98	171.27	84.23	869.26	413.75	93.84	869.259	70.64	75.9	91.34	90.12	97.56	95.21	78.33	1	1	0	0
PGAL8A_00523300	963	95.206	165	0.17134	0.001	0.001	0.045	4222	3526	3261	PF3D7_0812700	U1 small nuclear ribonucleoprotein C, putative		54.7	29.23	57.07	16.61	61.35	58.74	37.55	61.3536	85.23	77.9	78.76	71.42	84.35	71.63	58.87	1	1	0	0
PGAL8A_00523200	216	31.102	177	0.819444	0.0197	0.067	0.0264	3670	2197	3770	PF3D7_0812800	conserved protein, unknown function		1.43	1.45	6.01	1.34	7.53	6.64	31.94	31.9436	5.71	28.69	27.61	27.17	49.62	19.39	54.87	0	0	0	1
PGAL8A_00523000	1554	33.293	378	0.243243	0.092	0.001	0.0605	1248	3526	2868	PF3D7_0813000	conserved Plasmodium protein, unknown function		34.45	33.04	41.88	10.78	7.76	30.43	38.86	41.8769	78.73	79.44	72.72	64.18	50.27	56.47	59.76	0	0	0	1
PGAL8A_00522900	1758	32.844	531	0.302048	0.124	0.2016	0.2121	771	629	606	PF3D7_0813100	conserved Plasmodium protein, unknown function		2.47	0.56	16.63	39.6	4.04	14.52	33.06	39.6018	16.74	15.46	50.79	83.85	33.84	35.35	55.69	1	0	0	0
PGAL8A_00522800	936	114.501	765	0.817308	0.0721	0.4149	0.0916	1753	167	2167	PF3D7_0813200	CS domain protein, putative		16.62	24.58	53.38	35.88	17.04	53.51	89.12	89.1167	66.68	75.7	77.5	82.76	66.88	69.83	77.48	1	0	0	0
PGAL8A_00522700	1005	2692.01	579	0.576119	0.0158	0.0482	0.0442	3807	2585	3287	PF3D7_0813300	conserved Plasmodium protein, unknown function		508.29	3822.86	509.63	32.86	306.48	77.41	264.18	3822.86	97.78	99.48	96.43	81.77	94.79	76.89	91.88	1	1	1	0
PGAL8A_00522600	1827	288.372	945	0.517241	0.0347	0.0485	0.0339	3086	2580	3569	PF3D7_0813400	conserved Plasmodium protein, unknown function		159.27	325.81	187.02	33.55	22.72	109.76	85.5	325.814	93.79	95.43	91.83	81.91	71.07	82.46	76.49	1	1	0	0
PGAL8A_00522500	1707	80.314	465	0.272408	0.2133	0.0459	0.2272	183	2624	520	PF3D7_0813500	PUB domain-containing protein, putative		2.43	4.71	21.58	3.99	19.04	243.03	104.84	243.031	16.32	47.17	57.49	45.37	68.7	91.59	80.1	0	1	1	0
PGAL8A_00522400	765	151.303	351	0.458824	0.0555	0.0414	0.0551	2296	2723	3014	PF3D7_0813600	translation initiation factor SUI1, putative		107.36	47.46	63.63	9.11	28.07	30.39	50.28	107.363	91.59	84.11	80.66	61.12	74.35	56.41	65.55	1	0	0	0
PGAL8A_00522300	3792	34.318	1548	0.408228	0.0913	0.0275	0.1153	1264	3089	1729	PF3D7_0813700	ABC transporter F family member 1, putative		8.77	24.53	19.57	6.55	5.29	16.82	10.18	24.5318	54.92	75.63	54.72	54.73	40.59	39.88	31.9	0	0	0	1
PGAL8A_00522200	1089	10.611	1011	0.928375	0.0437	0.055	0.0916	2722	2436	2167	PF3D7_0813800	GDP-mannose 4,6-dehydratase		43.54	3.1	10.19	3.56	65.12	637.94	58.62	637.941	82.24	40.09	38.22	42.89	85.03	96.76	68.7	1	1	0	0
PGAL8A_00522100	435	366.577	393	0.903448	0.001	0.0818	0.0067	4222	1888	4156	PF3D7_0813900	40S ribosomal protein S16, putative		395.48	604.43	469.15	130.4	705.08	266.52	99.71	705.075	97.16	96.78	96.07	92.66	97.25	92.45	79.36	1	1	0	0
PGAL8A_00522000	648	1562.03	456	0.703704	0.0259	0.001	0.0614	3439	3526	2839	PF3D7_0814000	60S ribosomal protein L13-2, putative		443.33	1020.99	614.39	126.09	352.48	278.24	248.3	1020.99	97.49	98.04	96.92	92.44	95.24	92.8	91.19	1	1	1	0
PGAL8A_00521900	447	11.879	378	0.845638	0.1286	0.4047	0.4115	699	177	91	PF3D7_0814100	conserved Plasmodium protein, unknown function		21.72	8.51	11.05	1.32	127.19	528.92	15.65	528.923	71.33	56.88	40.11	26.91	90.6	96.17	39.1	0	1	0	0
PGAL8A_00521800	741	1479.02	426	0.574899	0.0084	0.001	0.0435	4044	3526	3307	PF3D7_0814200	DNA/RNA-binding protein Alba 1		6783.55	10197.6	7040	5181.8	1734.06	281.21	1839.29	10197.7	99.91	99.76	99.58	99.53	98.56	92.89	99.43	1	1	1	0
PGAL8A_00521700	3360	25.91	1608	0.478571	0.0692	0.1011	0.1249	1830	1566	1576	PF3D7_0814300	AAA family ATPase, putative		14.6	10.92	6.21	1.39	1.59	4.95	10.1	14.6021	64.45	61.45	28.2	27.71	14.77	16.44	31.68	0	0	0	1
PGAL8A_00521600	1791	60.081	1482	0.827471	0.0415	0.0628	0.0529	2810	2273	3068	PF3D7_0814400	phospholipase DDHD1, putative		5.58	0.31	8.23	5.47	1.24	12.69	12.35	12.6873	44.42	8.18	33.5	51.13	12.2	31.66	34.9	0	0	0	1
PGAL8A_00521500	1890	49.292	348	0.184127	0.8139	0.0755	0.7734	4	2016	14	PF3D7_0814500	conserved Plasmodium protein, unknown function		14.17	2.05	2.57	1.42	0.34	3.53	6.76	14.1659	63.87	33.49	17.47	27.91	6.63	13.85	25.98	0	0	0	1
PGAL8A_00521400	1182	10.668	1122	0.949239	0.0396	0.0629	0.0769	2885	2269	2469	PF3D7_0814600	conserved Plasmodium protein, unknown function		4.06	0.47	3.13	2.98	1.95	40.92	361.03	361.029	34.74	12.97	19.25	39.69	17.52	63.74	94.58	0	0	1	0
PGAL8A_00521300	849	33.208	300	0.353357	0.8986	0.001	0.3952	3	3526	105	PF3D7_0814700	conserved Plasmodium protein, unknown function		2.61	0.17	0.98	0.32	4.9	13.79	443.59	443.591	18.69	4.34	10.71	14.35	38.57	34.15	96	0	0	1	0
PGAL8A_00521100	597	103.45	519	0.869347	0.0294	0.0544	0.0221	3289	2449	3880	PF3D7_0814900	superoxide dismutase [Fe]	SOD1	94.6	47.02	146.52	70.89	172.6	161.07	28.12	172.6	90.41	84.04	90.15	88.97	92.66	87.59	52.16	1	1	0	0
PGAL8A_00521000	1005	167.254	588	0.585075	0.2286	0.1024	0.2802	152	1546	298	PF3D7_0815000	selenoprotein		3.66	13.06	21.43	7.24	9.37	83.63	11.92	83.6263	31.5	64.5	57.31	56.74	54.34	78.19	34.34	0	0	0	1
PGAL8A_00520900	2769	16.224	1293	0.466956	0.0907	0.1575	0.0955	1278	936	2089	PF3D7_0815100	RAP protein, putative		2.96	3.55	3.37	1.51	2.14	12.55	23.41	23.4144	23.49	42.39	19.84	28.8	18.94	31.44	47.67	0	0	0	1
PGAL8A_00520800	2634	43.63	2502	0.949886	0.0117	0.0023	0.0129	3939	3524	4056	PF3D7_0815200	importin beta, putative		56.83	47.47	89.04	14.17	3.13	8.32	33.46	89.039	85.68	84.13	85.23	69.12	27.21	22.73	56.03	1	0	0	0
PGAL8A_00520700	2889	34.521	1650	0.571132	0.0717	0.1678	0.136	1764	851	1384	PF3D7_0815300	FAD-dependent monooxygenase, putative		2.29	1.39	3.73	0.99	1.27	9.45	5.13	9.4505	14.44	27.92	20.93	23.26	12.45	25.06	23.03	0	0	0	1
PGAL8A_00086800	453	37.231	351	0.774834	0.0129	0.076	0.0464	3896	2009	3227	PF3D7_0815400	conserved Apicomplexan protein, unknown function		3.46	1.64	27.43	4.87	95.4	109.78	8.69	109.781	29.37	30.66	63.05	48.73	88.49	82.5	29.29	0	1	0	0
PGAL8A_00086700	1581	178.898	810	0.512334	0.1413	0.0626	0.0476	557	2283	3197	PF3D7_0815500	conserved Plasmodium protein, unknown function		8.98	1.4	46.33	27.88	2.68	13.79	12.32	46.3304	55.44	28.02	74.59	79.56	23.75	34.17	34.88	0	0	0	1
PGAL8A_00086600	807	152.582	543	0.672862	0.0192	0.001	0.0134	3685	3526	4046	PF3D7_0815600	eukaryotic translation initiation factor 3 subunit G, putative		387.67	444.6	339.16	170.81	140.22	128.65	119.63	444.599	97.06	96.23	94.65	93.92	91.19	84.85	82.5	1	1	1	0
PGAL8A_00086500	1044	13.405	315	0.301724	0.1054	0.0708	0.1589	1017	2123	1074	PF3D7_0815700	ubiquitin	PfsUb	3.72	1.2	7.41	2.62	8.04	24.28	0	24.2773	32.09	26	31.42	37.61	50.94	50.32	6.4	0	0	0	1
PGAL8A_00086400	4434	80.022	1317	0.297023	0.0685	0.074	0.1477	1851	2039	1214	PF3D7_0815800	vacuolar protein sorting-associated protein 9, putative		7.95	15.69	64.49	87.98	13.49	36.4	120.54	120.536	52.81	67.84	80.94	90.46	62.23	60.93	82.62	1	0	1	0
PGAL8A_00086300	1950	96.523	1515	0.776923	0.0782	0.0623	0.1036	1563	2293	1942	PF3D7_0815900	dihydrolipoyl dehydrogenase, apicoplast	PfLipDHa	4.85	0.59	4.98	0.88	2.69	5.52	26.57	26.5702	40.18	16.43	24.44	21.98	23.9	17.48	50.77	0	0	0	1
PGAL8A_00086200	1320	13.772	891	0.675	0.0704	0.0323	0.0559	1803	2957	2989	PF3D7_0816000	ribosome assembly protein RRB1, putative		64.22	36.37	19.57	5.58	8.42	12.22	44.55	64.2171	86.9	81.05	54.75	51.5	51.98	30.71	62.99	1	0	0	0
PGAL8A_00086100	549	21.021	468	0.852459	0.0752	0.7915	0.0685	1654	36	2663	PF3D7_0816100	phosphopantothenoylcysteine decarboxylase, putative		13.28	6.68	27.58	33.71	15.37	14.25	17.55	33.7102	62.71	52.81	63.16	81.98	65.01	34.9	41.55	1	0	0	0
PGAL8A_00086000	630	6.618	534	0.847619	0.0233	0.0149	0.0704	3531	3348	2616	PF3D7_0816200	vacuolar protein sorting-associated protein 2, putative		5.14	0.63	23.9	13.53	28.8	212.8	322.02	322.023	42.03	17.09	59.82	68.19	74.74	90.44	93.79	0	1	1	0
PGAL8A_00085900	3531	9.662	699	0.197961	0.1303	0.1109	0.185	673	1435	819	PF3D7_0816300	conserved Plasmodium protein, unknown function		2.16	0.71	0.49	0.2	0.84	7.27	4.66	7.2702	12.5	18.9	7.44	12.17	9.71	20.56	22.15	0	0	0	1
PGAL8A_00085800	693	30.047	624	0.900433	0.0512	0.1218	0.0461	2438	1301	3235	PF3D7_0816400	EF-hand calcium-binding domain-containing protein, putative		3.87	0.23	17.47	12.14	46.21	94.31	69.76	94.3131	33.04	5.49	51.9	66.21	80.84	80.08	72.67	0	1	0	0
PGAL8A_00085700	516	21.922	474	0.918605	0.0573	0.001	0.0038	2236	3526	4197	PF3D7_0816500	small heat shock protein HSP20, putative		4.22	0.46	0.95	0.57	90.69	120.84	638.91	638.911	36.04	12.72	10.54	18.05	88.11	84.09	97.52	0	1	1	0
PGAL8A_00085600	3096	131.44	2583	0.834302	0.0108	0.0085	0.0084	3965	3476	4130	PF3D7_0816600	chaperone protein ClpB1		9.68	41.11	60.32	9.51	2.19	4.13	26.13	60.3159	57.02	82.31	79.82	61.9	19.35	15.15	50.48	1	0	0	0
PGAL8A_00085500	432	64.534	318	0.736111	0.0221	0.0656	0.1094	3570	2220	1822	PF3D7_0816700	trafficking protein particle complex subunit 2-like protein, putative	TCA17	5.56	6.24	26.48	2.04	43.78	306.07	35.63	306.069	44.31	51.53	62.21	33.38	80.22	93.42	57.61	0	1	0	0
PGAL8A_00085400	1044	30.177	972	0.931034	0.0072	0.086	0.0235	4084	1814	3852	PF3D7_0816800	meiotic recombination protein DMC1, putative		6.9	7.67	9.77	4.22	178.54	913.38	324.32	913.378	49.87	55.22	37.25	46.51	92.76	97.65	93.82	0	1	1	0
PGAL8A_00109800	966	94.487	417	0.431677	0.1087	0.3774	0.2117	959	199	609	PF3D7_0816900	adenylate kinase 2		2.4	0.38	0.2	0	4.25	49.17	32.11	49.1708	15.96	10.62	4.79	5.14	34.9	67.98	54.98	0	0	0	1
PGAL8A_00109900	1149	8.75	786	0.684073	0.1157	0.3685	0.1841	857	210	833	PF3D7_0817000	NEDD8-activating enzyme E1 catalytic subunit, putative		1.7	0.41	2.53	0.5	2.26	13.67	2.39	13.6705	7.56	11.27	17.34	17.04	20.03	33.84	16.87	0	0	0	1
PGAL8A_00110000	2127	43.315	849	0.399154	0.0376	0.1696	0.1338	2959	838	1419	PF3D7_0817100	tRNA modification GTPase, putative		3.81	5.06	4.85	0.35	1.59	7.23	222.25	222.245	32.61	48.24	23.99	15.05	14.79	20.5	90.1	0	0	1	0
PGAL8A_00110100	2037	47.739	729	0.357879	0.2923	0.0843	0.1199	69	1846	1652	PF3D7_0817200	conserved Plasmodium protein, unknown function		8.21	4.41	15.04	8.24	4.28	15.28	35.7	35.6951	53.59	46.08	48.24	59.13	35.1	36.96	57.66	0	0	0	1
PGAL8A_00110200	5763	68.878	582	0.100989	0.0272	0.0822	0.242	3373	1880	434	PF3D7_0817300	conserved Plasmodium protein, unknown function // asparagine-rich antigen		11.97	126.66	99.91	9.16	4.85	16.24	33.16	126.655	60.84	91.85	86.57	61.26	38.27	38.48	55.74	1	0	0	0
PGAL8A_00110300	1437	3.509	660	0.45929	0.0486	0.0861	0.1986	2542	1812	696	PF3D7_0817400	phosphatase, putative		2.21	1.43	9.08	2.52	3.81	16.77	12.6	16.7674	13.23	28.42	35.4	36.94	32.39	39.8	35.32	0	0	0	1
PGAL8A_00110400	555	75.164	495	0.891892	0.0584	0.1255	0.0737	2194	1246	2549	PF3D7_0817500	protein kinase c inhibitor-like protein, putative		319.53	206.61	957.41	422.43	1394.54	747.7	1130.84	1394.54	96.47	94.11	97.89	97.2	98.3	97.2	98.91	1	1	1	0
PGAL8A_00110500	2928	28.502	798	0.272541	0.1108	0.1887	0.1842	917	698	832	PF3D7_0817600	conserved Plasmodium protein, unknown function		6.79	0.82	84.09	119.54	5.18	44.26	218.42	218.418	49.51	20.91	84.49	92.16	40.12	65.86	89.89	1	0	1	0
PGAL8A_00110700	3459	188.201	2661	0.769297	0.1478	0.1147	0.0242	495	1387	3835	PF3D7_0817700	rhoptry neck protein 5	PfRON5	5.74	0.91	163.75	410.59	38.27	15.39	57.64	410.595	45.14	22.14	91	97.14	78.55	37.13	68.35	1	0	0	0
PGAL8A_00110800	162	76.042	150	0.925926	0.0178	0.001	0.2903	3735	3526	269	PF3D7_0817800	conserved Plasmodium protein, unknown function		8.86	3.84	130.67	108.66	1406.96	571.05	118.71	1406.96	55.17	43.9	89.11	91.57	98.32	96.43	82.31	1	1	1	0
PGAL8A_00110900	300	2079.58	216	0.72	0.004	0.001	0.0861	4174	3526	2274	PF3D7_0817900	high mobility group protein B2	PfHMGB2	114.13	140.35	1125.74	1882.99	6873.52	7123.56	2602.39	7123.56	92.04	92.47	98.27	98.96	99.39	99.62	99.62	1	1	1	0
PGAL8A_00111000	1377	163.945	261	0.189542	0.0328	0.001	0.1677	3172	3526	982	PF3D7_0818000	U4/U6.U5 small nuclear ribonucleoprotein, putative		319.41	194.51	468.45	564.45	31.35	43.31	157.54	564.446	96.45	93.79	96.05	97.7	75.97	65.5	86.31	1	0	1	0
PGAL8A_00111100	1539	32.376	1080	0.701754	0.0454	0.0804	0.1804	2673	1924	862	PF3D7_0818100	zinc finger protein, putative		7.88	0.78	41.48	49.26	6.6	6.17	54.51	54.5117	52.57	20.24	72.53	86.1	46.34	18.63	67.23	1	0	0	0
PGAL8A_00111200	789	5438.74	750	0.95057	0.001	0.001	0.001	4222	3526	4217	PF3D7_0818200	14-3-3 protein	Pf14-3-3I	653.05	1280.92	6943.41	4863.13	1720.64	237.73	634.84	6943.41	98.32	98.39	99.55	99.52	98.55	91.38	97.49	1	1	1	0
PGAL8A_00111300	1671	1.732	945	0.56553	0.0891	0.1771	0.4882	1309	781	57	PF3D7_0818300	dynactin subunit 6, putative		5.4	0.75	0.88	0.52	4.7	56.79	49.05	56.7912	43.52	19.65	10.09	17.41	37.49	70.94	65.19	0	0	0	1
PGAL8A_00111400	582	62.675	465	0.798969	0.0196	0.0218	0.0146	3672	3217	4028	PF3D7_0818400	rRNA-processing protein FCF1, putative		36.19	19.79	16.82	1.48	67.05	156.37	98.43	156.365	79.45	72.1	51.08	28.39	85.39	87.24	79.14	0	1	0	0
PGAL8A_00111500	489	201.375	327	0.668712	0.0263	0	0.0328	3419	4212	3599	PF3D7_0818500	zinc finger protein, putative		198.27	114.81	156.15	410.76	178.32	234.26	427.51	427.513	94.65	91.34	90.65	97.16	92.75	91.29	95.81	1	1	1	0
PGAL8A_00111600	825	9.012	696	0.843636	0.1562	0.2097	0.1189	426	580	1670	PF3D7_0818600	BEM46-like protein, putative		21.47	2.88	50.52	38.8	30.12	117.09	241.65	241.655	71.14	39.02	76.35	83.61	75.58	83.59	90.95	1	1	1	0
PGAL8A_00111700	2817	126.885	1827	0.648562	0.0122	0.0308	0.0272	3923	3005	3743	PF3D7_0818700	DNA helicase, putative		108.94	29.84	94.95	38.26	18.39	26.5	63.25	108.937	91.69	78.19	86.07	83.37	68.11	52.47	70.45	1	0	0	0
PGAL8A_00111800	1014	19.914	717	0.707101	0.0204	0.0084	0.0184	3639	3479	3964	PF3D7_0818800	U3 small nucleolar ribonucleoprotein protein IMP4, putative		26.94	12.09	6.05	1.35	5.55	62.31	43.68	62.3101	74.95	63.08	27.75	27.23	41.71	73.01	62.56	0	0	0	1
PGAL8A_00112000	4323	63.56	1716	0.396947	0.0947	0.2293	0.1473	1195	506	1219	PF3D7_0819000	conserved Plasmodium protein, unknown function		43.88	28.04	15.28	1.71	5.02	21.64	44.01	44.0113	82.36	77.5	48.57	30.57	39.25	47.14	62.77	1	0	0	0
PGAL8A_00112100	864	57.25	567	0.65625	0.0512	0.0464	0.1485	2438	2615	1205	PF3D7_0819100	BRIX domain, putative		45.49	14.11	7.6	0.66	17.34	77.72	22.06	77.724	82.86	65.92	31.87	19.37	67.18	76.96	46.27	1	0	0	0
PGAL8A_00112200	1890	5.969	1365	0.722222	0.1247	0.1761	0.2264	760	790	525	PF3D7_0819200	perforin-like protein 5	PPLP5	4.99	2.03	1.01	0	0.76	1.96	135.02	135.022	41.22	33.3	10.91	5.14	9.16	11.22	83.92	0	0	1	0
PGAL8A_00112300	2922	9.366	1605	0.549281	0.1765	0.2098	0.2507	308	579	406	PF3D7_0819300	conserved Plasmodium protein, unknown function		1.73	1.65	2.13	0.38	2.21	6.81	3.13	6.809	7.87	30.69	15.99	15.27	19.59	19.7	18.71	0	0	0	1
PGAL8A_00112400	1896	3.676	1470	0.775316	0.0799	0.1399	0.2512	1528	1096	404	PF3D7_0819400	perforin-like protein 4	PPLP4	2.23	0.44	1.21	0.15	0.73	3.7	91.14	91.1394	13.57	12.45	11.94	11.58	9.05	14.12	77.9	0	0	0	1
PGAL8A_00112500	1158	38.806	852	0.735751	0.0386	0.0306	0.0423	2919	3015	3330	PF3D7_0819500	conserved protein, unknown function		4.95	34.42	17.01	2.78	21.69	30.89	47	46.9993	40.94	80.13	51.45	38.69	70.47	56.83	64.25	1	0	0	0
PGAL8A_00112600	699	121.238	477	0.682403	0.0532	0.0513	0.0428	2367	2528	3319	PF3D7_0819600	conserved Plasmodium protein, unknown function		17.77	31.85	95.02	121.93	16.22	249.9	310.36	310.359	67.91	79.02	86.08	92.26	65.88	91.97	93.53	1	1	1	0
PGAL8A_00112700	1569	23.93	543	0.34608	0.1536	0.1189	0.3353	448	1334	172	PF3D7_0819700	conserved Plasmodium protein, unknown function		1.65	0.51	5.47	3.01	2.58	8.1	16.1	16.1025	7.18	13.9	25.81	39.9	22.75	22.35	39.64	0	0	0	1
PGAL8A_00112800	3726	13.047	1794	0.481481	0.1335	0.3133	0.2358	642	275	470	PF3D7_0819800	conserved Plasmodium protein, unknown function		2.94	0.34	2.96	1.95	4.4	31.37	24.82	31.372	23.26	9.02	18.75	32.44	35.81	57.26	49.3	0	0	0	1
PGAL8A_00112900	276	62.362	267	0.967391	0.0267	0.0589	0.0555	3401	2356	3004	PF3D7_0819900	U6 snRNA-associated Sm-like protein LSm3, putative		18.91	13.5	9.84	4.26	34.66	65.68	50.69	65.6781	68.86	65.14	37.34	46.58	77.24	73.86	65.66	0	0	0	1
PGAL8A_00113000	5286	146.15	2697	0.510216	0.0394	0.0294	0.0441	2889	3045	3290	PF3D7_0820000	Snf2-related CBP activator, putative // helicase SRCAP, putative	PfSRCAP	22.47	37.51	24.69	3.06	5.02	11.01	45.68	45.675	71.91	81.43	60.5	40.23	39.17	28.13	63.65	1	0	0	0
PGAL8A_00113100	1029	25.663	432	0.419825	0.1379	0.0518	0.1774	590	2515	889	PF3D7_0820100	RNA-binding protein, putative		3.48	2.86	6.25	2.72	4.48	14.54	18.14	18.1369	29.7	38.9	28.34	38.24	36.26	35.38	42.17	0	0	0	1
PGAL8A_00113200	1905	43.825	1308	0.686614	0.0802	0.0506	0.149	1520	2541	1198	PF3D7_0820200	phosphatidylglycerophosphate synthase	PfPGPS	13.25	9.26	19.81	8.14	1.55	12.3	7.04	19.8061	62.68	58.42	55.15	58.92	14.47	31.04	26.61	0	0	0	1
PGAL8A_00113300	1299	42.79	372	0.286374	0.1686	0	0.1398	349	4212	1321	PF3D7_0820300	conserved Plasmodium protein, unknown function		103.93	42.27	47.85	32.71	14.39	42.84	26.59	103.935	91.26	82.76	75.23	81.76	63.56	65.17	50.82	1	0	0	0
PGAL8A_00113400	1377	19.852	792	0.575163	0.0344	0.1723	0.2624	3102	816	354	PF3D7_0820400	conserved Plasmodium protein, unknown function		6.96	1.22	2.52	0.59	10.04	24.56	1.87	24.5573	50.03	26.12	17.31	18.31	55.91	50.56	15.84	0	0	0	1
PGAL8A_00113500	1959	14.621	729	0.372129	0.0492	0.0628	0.0715	2515	2273	2598	PF3D7_0820500	protein transport protein YIF1, putative		42.26	10.81	26.11	7.47	3.14	21.36	16.95	42.261	81.74	61.24	61.8	57.45	27.26	46.81	40.75	1	0	0	0
PGAL8A_00113600	1374	22.472	912	0.663755	0.0726	0.0395	0.0319	1735	2771	3626	PF3D7_0820600	conserved Plasmodium membrane protein, unknown function		2.29	0.29	7.52	4.08	15.6	46.7	13.3	46.6968	14.33	7.53	31.63	45.7	65.24	67.02	36.07	0	0	0	1
PGAL8A_00113700	3111	83.873	2826	0.90839	0.0374	0.0199	0.0176	2967	3264	3976	PF3D7_0820700	2-oxoglutarate dehydrogenase E1 component		4.52	2.34	91.93	29.23	7.62	17.07	28.28	91.9271	38.29	35.81	85.7	80.23	49.89	40.3	52.28	1	0	0	0
PGAL8A_00113800	2304	8.802	1230	0.533854	0.0925	0.0626	0.0927	1233	2283	2139	PF3D7_0820800	conserved Plasmodium protein, unknown function		3.15	0.91	7.25	1.44	0.81	3.68	3.43	7.252	25.79	21.94	31.04	28.08	9.45	14.07	19.58	0	0	0	1
PGAL8A_00114100	1545	38.675	1188	0.768932	0.0356	0.0086	0.0171	3044	3473	3990	PF3D7_0821000	conserved Plasmodium protein, unknown function		1.49	3.7	76.33	50.79	7.33	16.56	27.17	76.3254	6.11	43.28	83.28	86.41	49.01	39.31	51.38	1	0	0	0
PGAL8A_00114200	2820	42.886	1269	0.45	0.0255	0.1061	0.0465	3456	1501	3223	PF3D7_0821100	protein kinase 1	PfPK1	25.63	7.33	25.34	8.74	3.55	9.84	9.64	25.6332	74.23	54.44	61.05	60.43	30.47	25.83	30.67	0	0	0	1
PGAL8A_00114400	603	131.825	399	0.661692	0.0264	0.0211	0.0532	3415	3234	3060	PF3D7_0821200	conserved Plasmodium protein, unknown function		17.58	8.53	18.43	5.1	26.92	56.04	9.72	56.0415	67.75	56.93	53.35	49.52	73.7	70.62	30.88	0	0	0	1
PGAL8A_00114500	2442	25.793	1536	0.628993	0.029	0.0375	0.0457	3310	2824	3247	PF3D7_0821300	ATP-dependent RNA helicase DHX36, putative		25.01	27.47	11.82	1.92	3.13	13.03	83.28	83.2817	73.76	77.15	41.82	32.16	27.18	32.35	76.04	0	0	0	1
PGAL8A_00114600	684	10.328	582	0.850877	0.0496	0.0359	0.1727	2500	2866	929	PF3D7_0821500	ribosomal RNA small subunit methyltransferase NEP1, putative		21.87	13.4	3.62	0	9.82	33	21.65	33.0046	71.4	64.93	20.65	5.14	55.41	58.56	45.94	0	0	0	1
PGAL8A_00114700	1608	21.975	1134	0.705224	0.0178	0.0534	0.0389	3735	2473	3430	PF3D7_0821600	polyribonucleotide 5'-hydroxyl-kinase Clp1, putative		27.48	18.79	17.88	2.76	4.78	21.4	39.38	39.383	75.32	71.11	52.52	38.46	37.93	46.85	60.05	0	0	0	1
PGAL8A_00114800	414	118.814	252	0.608696	0.0089	0.001	0.001	4033	3526	4217	PF3D7_0821700	60S ribosomal protein L22, putative		79.78	266.76	145.38	31.49	87.98	210.49	249.85	266.758	88.89	94.93	90.12	81.32	87.88	90.39	91.28	1	1	1	0
PGAL8A_00114900	237	62.002	153	0.64557	0.001	0.1217	0.0132	4222	1303	4051	PF3D7_0821800	protein transport protein SEC61 subunit beta, putative	Sec61-beta	1336.86	1068.96	1463.96	2532.71	2665.09	3240.4	414.56	3240.4	99.22	98.13	98.6	99.15	99.01	99.17	95.58	1	1	1	0
PGAL8A_00115000	324	17.335	270	0.833333	0.0097	0.001	0.017	4011	3526	3994	PF3D7_0821900	conserved Plasmodium protein, unknown function		8.38	8.81	36.07	9.07	203.99	61.33	73.41	203.988	53.9	57.43	69.27	61.07	93.3	72.62	73.58	0	1	0	0
PGAL8A_00115100	1884	55.086	1059	0.562102	0.0125	0.001	0.0639	3913	3526	2781	PF3D7_0822000	mitochondrial ribosomal protein L4 precursor, putative		4.28	3.39	17.35	3.96	5.03	18.17	45.9	45.9001	36.42	41.63	51.72	45.28	39.29	41.92	63.75	0	0	0	1
PGAL8A_00115200	720	6.271	411	0.570833	0.0887	0.3525	0.0763	1318	224	2485	PF3D7_0822100	mediator of RNA polymerase II transcription subunit 7, putative		14.07	11.47	11.56	2.08	93.12	142.31	17.86	142.311	63.75	62.26	41.06	33.79	88.26	86.22	41.89	0	1	0	0
PGAL8A_00115400	3945	6.879	1503	0.380989	0.0465	0.4643	0.3345	2633	129	173	PF3D7_0822200	phosphorylated CTD interacting factor 1 WW domain-containing protein, putative		8.73	2.96	2.12	0.19	4.37	23.01	3.7	23.0099	54.8	39.41	15.98	12.13	35.61	48.85	20.2	0	0	0	1
PGAL8A_00115500	252	16.232	249	0.988095	0.009	0.001	0.0281	4030	3526	3717	PF3D7_0822300	small nuclear ribonucleoprotein G, putative	SMX2	83.26	38.39	54.21	11.66	172.37	340.43	33.31	340.433	89.18	81.74	77.76	65.45	92.64	94.13	55.9	1	1	0	0
PGAL8A_00115600	1596	6.245	741	0.464286	0.1106	0.1202	0.1557	922	1320	1115	PF3D7_0822400	conserved Plasmodium protein, unknown function		5.36	1.9	2.25	0.8	3.69	41	46.93	46.925	43.43	32.49	16.41	21.06	31.56	63.87	64.22	0	0	0	1
PGAL8A_00115700	597	13.56	486	0.81407	0.0106	0.001	0.0261	3974	3526	3782	PF3D7_0822500	dynein light chain 1 // leucine-rich repeat protein	PfLRR7	9.57	2.51	2.33	0	18.15	29.57	60.63	60.6291	56.83	36.97	16.69	5.14	67.89	55.51	69.48	0	0	0	1	PGAL8A_00001700	4062	1974
PGAL8A_00115800	2280	277.772	2196	0.963158	0.0039	0.0034	0.0051	4176	3520	4181	PF3D7_0822600	protein transport protein SEC23	PfSEC23	167.02	51.4	255.61	128.26	30	36.35	29.46	255.607	93.98	85.22	93.61	92.54	75.45	60.91	53.15	1	0	0	0
PGAL8A_00115900	2562	0.669	1071	0.418033	0.0623	0.1689	0.0886	2050	843	2226	PF3D7_0822700	thrombospondin-related protein 1, putative		5	1	3.53	1.27	2.22	6.57	1.51	6.5672	41.32	23.42	20.34	26.28	19.65	19.25	14.99	0	0	0	1
PGAL8A_00116000	972	32.267	891	0.916667	0.0298	0.0235	0.0746	3262	3178	2519	PF3D7_0822800	U5 small nuclear ribonucleoprotein 40 kDa protein, putative		24.95	18.95	28.61	4.82	9.7	20.58	33.01	33.0052	73.71	71.28	64.15	48.55	55.17	45.49	55.63	0	0	0	1
PGAL8A_00116100	2739	254.507	1122	0.409639	0.1222	0.0973	0.1166	788	1618	1708	PF3D7_0822900	conserved Plasmodium protein, unknown function		5.68	0.43	33.7	41.95	1.28	3.84	43.59	43.5867	44.76	11.96	67.79	84.73	12.48	14.4	62.51	1	0	0	0
PGAL8A_00116200	3057	8.847	1593	0.521099	0.114	0.1339	0.0897	874	1157	2205	PF3D7_0823000	serine/threonine protein kinase VPS15, putative		4.31	4.88	6.09	1.54	2.14	14.25	4.9	14.2532	36.7	47.65	27.85	29.23	18.97	34.91	22.73	0	0	0	1
PGAL8A_00116300	687	35.691	462	0.672489	0.0412	0.001	0.0675	2824	3526	2683	PF3D7_0823100	RWD domain-containing protein, putative		29.2	20	8.83	0.85	13.55	21.21	6.08	29.1984	76.23	72.23	34.83	21.65	62.39	46.51	24.69	0	0	0	1
PGAL8A_00116400	861	1522.06	804	0.933798	0.0031	0.0393	0.0629	4190	2777	2806	PF3D7_0823200	RNA-binding protein, putative		1020.48	2814.42	1788.61	1339.16	646.16	189.6	128.38	2814.42	98.98	99.29	98.86	98.72	97.02	89.32	83.23	1	1	1	0
PGAL8A_00116500	6102	155.12	1701	0.278761	0.0355	0.0973	0.0646	3050	1618	2761	PF3D7_0823300	histone acetyltransferase GCN5		76.07	199.72	111.37	31.21	14.38	22.22	29.27	199.724	88.38	93.94	87.66	81.18	63.55	47.86	53	1	0	0	0
PGAL8A_00116600	1500	4.054	1035	0.69	0.0702	0.0986	0.0992	1807	1607	2019	PF3D7_0823400	alpha/beta hydrolase, putative		2.11	0.8	0.61	0	2.74	18.02	0	18.0165	11.94	20.52	8.12	5.14	24.27	41.61	6.4	0	0	0	1
PGAL8A_00116700	1482	59.285	987	0.665992	0.1577	0.0433	0.2069	411	2682	645	PF3D7_0823500	inner membrane complex protein 1i, putative		7.89	0.42	3.44	0	2.99	2.12	1314.76	1314.76	52.61	11.77	20.08	5.14	26.24	11.51	99.12	0	0	1	0
PGAL8A_00116800	1290	25.904	804	0.623256	0.1338	0.2239	0.3027	638	525	231	PF3D7_0823600	lipoate-protein ligase B		7.52	1.52	1.01	0.9	0.84	1.93	19.3	19.2983	51.72	29.62	10.87	22.28	9.69	11.16	43.26	0	0	0	1
PGAL8A_00116900	198	36.591	159	0.80303	0.0438	0.001	0.2494	2715	3526	410	PF3D7_0823700	mitochondrial import receptor subunit TOM7, putative		48.3	26.04	25.38	5.85	37.75	68.48	13.92	68.4826	83.61	76.37	61.1	52.66	78.31	74.52	36.9	1	0	0	0
PGAL8A_00117000	1965	89.293	1368	0.696183	0.0525	0.0278	0.0334	2385	3079	3583	PF3D7_0823800	DnaJ protein, putative		16.76	21.6	57.54	24.64	3.02	15.71	8.53	57.5367	66.85	73.52	78.97	77.76	26.52	37.58	29.05	0	0	0	1
PGAL8A_00117100	957	47.782	831	0.868339	0.0515	0.0244	0.0463	2424	3150	3230	PF3D7_0823900	dicarboxylate/tricarboxylate carrier	PfDTC	6.44	11.85	35.86	12.59	24.13	9.12	26.32	35.8571	48.19	62.77	69.17	66.73	71.78	24.27	50.6	0	0	0	1
PGAL8A_00117200	2265	2.105	963	0.425166	0.1138	0.2005	0.3879	876	634	116	PF3D7_0824000	conserved Plasmodium protein, unknown function		2.54	0.29	1.29	0.61	1	4.2	541.99	541.991	17.85	7.62	12.36	18.63	10.58	15.22	96.99	0	0	1	0
PGAL8A_00117300	1224	5.019	798	0.651961	0.1285	0.1844	0.1046	703	737	1922	PF3D7_0824100	exonuclease, putative		1.8	2.47	7.21	0	9.19	19.21	399.92	399.916	8.62	36.7	30.97	5.14	53.94	43.67	95.27	0	0	1	0
PGAL8A_00117400	3114	19.381	2055	0.659923	0.0675	0.0512	0.0707	1888	2529	2612	PF3D7_0824200	conserved Plasmodium protein, unknown function		2.04	1.74	6.51	1.48	2.83	8.39	11.61	11.6076	11.06	31.38	29.08	28.44	24.98	22.87	33.91	0	0	0	1
PGAL8A_00117500	2214	32.148	1389	0.627371	0.0452	0.1207	0.1395	2678	1314	1331	PF3D7_0824300	GTP-binding protein, putative		2.74	0.99	8.43	5.44	3.32	18.66	34.95	34.9482	20.62	23.18	33.94	50.96	28.61	42.74	57.09	0	0	0	1
PGAL8A_00117600	1713	27.976	849	0.495622	0.1722	0.0693	0.1064	334	2149	1877	PF3D7_0824400	nucleoside transporter 2	PfNT2	7.01	79.61	60.34	17.22	54.42	43.51	27.86	79.6067	50.18	88.84	79.83	72.11	82.92	65.55	51.88	1	1	0	0
PGAL8A_00117700	1095	11.413	615	0.561644	0.0842	0.0898	0.1815	1426	1751	857	PF3D7_0824500	conserved Plasmodium protein, unknown function		4.19	21.77	22	2.36	9.02	90.11	9.98	90.1114	35.75	73.65	57.88	35.54	53.57	79.26	31.48	0	0	0	1
PGAL8A_00117800	735	56.949	456	0.620408	0.0353	0.0848	0.1049	3057	1837	1915	PF3D7_0824600	Fe-S cluster assembly protein DRE2, putative		23.2	14.55	9.14	2.94	36.79	86.53	27.95	86.529	72.32	66.49	35.62	39.5	78	78.62	51.95	0	0	0	1
PGAL8A_00117900	1767	8.499	1068	0.604414	0.2044	0.3006	0.125	206	305	1571	PF3D7_0824700	lipase maturation factor, putative		2.24	0.4	16.66	3.65	6.26	21.27	3.16	21.2681	13.69	11.12	50.91	43.43	45.02	46.65	18.75	0	0	0	1
PGAL8A_00118000	2820	28.81	1149	0.407447	0.0453	0.0108	0.1149	2675	3428	1734	PF3D7_0824800	conserved Plasmodium membrane protein, unknown function		22.53	18.38	14.5	5.68	5.25	25.71	21.18	25.7081	71.99	70.64	46.98	51.96	40.45	51.65	45.47	0	0	0	1
PGAL8A_00118100	2964	25.545	1080	0.364372	0.2472	0.2168	0.3148	112	547	204	PF3D7_0824900	conserved Plasmodium protein, unknown function		20.61	14.52	6.14	1	2.28	10.43	90.04	90.0361	70.31	66.44	28.01	23.44	20.24	26.93	77.74	0	0	0	1
PGAL8A_00118200	5583	90.461	1245	0.222998	0.1174	0.199	0.3192	840	647	197	PF3D7_0825000	conserved Plasmodium protein, unknown function		5.94	7.05	14.99	6.24	3.81	76.66	309.8	309.798	46.04	53.7	48.21	53.83	32.34	76.56	93.51	0	0	1	0
PGAL8A_00118300	558	8.275	429	0.768817	0.0367	0.0298	0.0898	2992	3035	2203	PF3D7_0825100	ankyrin-repeat protein, putative		2.42	0.71	0.29	0	19.8	51.67	29.93	51.665	16.27	18.75	5.94	5.14	69.4	68.88	53.52	0	0	0	1
PGAL8A_00118400	489	12.628	354	0.723926	0.0607	0.001	0.1005	2119	3526	1996	PF3D7_0825200	translation initiation factor IF-3		2.31	0.64	22.14	9.44	28.93	23.55	14.05	28.9279	14.57	17.17	58.01	61.81	74.85	49.51	37.08	0	0	0	1
PGAL8A_00118500	447	17.845	192	0.42953	0.0345	0.5016	0.0782	3098	107	2449	PF3D7_0825300	SAYSvFN domain-containing protein, putative		4.67	2.66	13.99	3.29	60.52	1120.74	156.5	1120.74	39.1	37.84	46.2	41.51	84.14	98.01	86.2	0	1	1	0
PGAL8A_00118600	234	106.197	189	0.807692	0.0267	0.001	0.001	3401	3526	4217	PF3D7_0825400	conserved Apicomplexan protein, unknown function		5.51	3.74	17.6	2.45	96.53	86.44	159.35	159.346	44.15	43.48	52.16	36.33	88.63	78.59	86.52	0	1	1	0
PGAL8A_00118700	2061	49.058	681	0.330422	0.0484	0.0456	0.1175	2550	2631	1691	PF3D7_0825500	protein KRI1, putative		42.74	28.52	11.78	1.4	4.42	23.56	34.74	42.7368	81.98	77.64	41.75	27.8	35.92	49.52	57.02	1	0	0	0
PGAL8A_00118800	258	8.629	255	0.988372	0.0631	0.001	0.0231	2027	3526	3858	PF3D7_0825600	cytochrome c oxidase assembly protein, putative		32.37	5.22	14.67	4.56	57.54	102.57	21.69	102.573	77.65	48.62	47.45	47.57	83.66	81.37	45.98	0	1	0	0
PGAL8A_00118900	888	24.893	528	0.594595	0.0335	0.0495	0.1219	3151	2563	1628	PF3D7_0825700	conserved Plasmodium protein, unknown function		2.84	0.52	0.18	0	48.64	1472.64	557.82	1472.64	21.95	14.28	4.5	5.14	81.48	98.37	97.11	0	1	1	0
PGAL8A_00119000	1245	34.17	618	0.496386	0.0271	0.0259	0.1854	3380	3118	813	PF3D7_0825800	conserved Plasmodium protein, unknown function		4.36	0.65	0.68	0	43.63	1510.72	2240.07	2240.07	37.18	17.45	8.62	5.14	80.11	98.48	99.57	0	1	1	0
PGAL8A_00119100	1164	14.28	441	0.378866	0.1161	0.0512	0.231	852	2529	487	PF3D7_0825900	conserved Plasmodium protein, unknown function		3.33	0.66	0.47	0.31	7.18	80.63	138.89	138.89	27.94	17.77	7.19	14.11	48.47	77.57	84.37	0	0	1	0
PGAL8A_00119200	2706	9.422	843	0.31153	0.095	0.1536	0.1274	1187	970	1534	PF3D7_0826000	conserved Plasmodium protein, unknown function		4.24	9.42	2.57	0.67	2.66	9.28	7.16	9.4184	36.16	58.78	17.48	19.44	23.5	24.77	26.78	0	0	0	1
PGAL8A_00119300	23940	210.469	10710	0.447368	0.036	0.0522	0.0544	3021	2506	3030	PF3D7_0826100	E3 ubiquitin-protein ligase, putative		49.67	75.83	34.85	7.26	10.12	38.44	29.47	75.8303	84.07	88.42	68.58	56.88	56.15	62.06	53.19	1	0	0	0
PGAL8A_00119400	2205	66.76	888	0.402721	0.0653	0.1243	0.0609	1958	1262	2858	PF3D7_0826200	alpha/beta hydrolase, putative		2.25	0.22	3.09	1.3	2.07	17.9	14.7	17.8976	13.87	5.35	19.06	26.71	18.3	41.41	38	0	0	0	1
PGAL8A_00119500	1563	35.009	774	0.495202	0.024	0.0148	0.0576	3509	3349	2947	PF3D7_0826300	SPRY domain, putative		2.65	3.5	36.96	9.23	11.26	42.09	37.64	42.0928	19.27	42.17	69.88	61.36	58.54	64.72	58.94	0	0	0	1
PGAL8A_00119600	942	46.773	669	0.710191	0.0769	0.087	0.1339	1604	1797	1418	PF3D7_0826400	dehydrodolichyl diphosphate synthetase, putative		2.84	0.33	24.32	16.94	22.71	33.33	14.67	33.3283	21.97	8.84	60.24	71.77	71.06	58.84	37.95	0	0	0	1
PGAL8A_00119700	3792	124.998	2499	0.659019	0.0269	0.0198	0.043	3391	3267	3316	PF3D7_0826500	ubiquitin conjugation factor E4 B, putative	UFD2	33.09	13.23	53.14	27.46	13.81	41.18	26.71	53.1448	78.05	64.67	77.39	79.33	62.82	64	51.03	0	0	0	1
PGAL8A_00119800	810	31.971	561	0.692593	0.0516	0.001	0.0995	2418	3526	2017	PF3D7_0826600	SNARE protein, putative	PfVAMP7	37.81	7.92	10.6	6.37	24.61	60.78	10.1	60.775	80.15	55.82	39.12	54.15	72.2	72.43	31.69	1	0	0	0
PGAL8A_00119900	969	649.166	966	0.996904	0.0159	0.001	0.0075	3804	3526	4145	PF3D7_0826700	receptor for activated c kinase	PfRACK	1950.83	1661.69	1307.68	205.92	339.08	166.25	197.2	1950.83	99.48	98.77	98.41	94.93	95.1	88.02	88.89	1	1	1	0
PGAL8A_00120100	1851	26.953	492	0.265802	0.0795	0.9051	0.161	1535	26	1054	PF3D7_0826900	conserved Plasmodium protein, unknown function		6.56	3.69	22.44	5.59	2.48	17.98	24.77	24.7743	48.71	43.17	58.4	51.58	21.98	41.47	49.25	0	0	0	1
PGAL8A_00120200	3486	48.939	1551	0.444923	0.0358	0.0253	0.0563	3030	3129	2978	PF3D7_0827000	ATP-dependent RNA helicase DBP10, putative		36.47	42.49	22.26	2.58	1.76	7.64	31.45	42.4934	79.56	82.81	58.2	37.39	16.18	21.33	54.61	1	0	0	0
PGAL8A_00120300	3825	33.658	1722	0.450196	0.0386	0.0745	0.12	2919	2034	1650	PF3D7_0827100	translation initiation factor IF-2, putative		10.16	19.83	17.23	3.43	6.79	17.45	19.35	19.8322	57.88	72.17	51.62	42.2	47.05	40.78	43.33	0	0	0	1
PGAL8A_00120500	2796	60.29	276	0.0987124	0.1199	0.2329	0.0845	813	483	2311	PF3D7_0827300	conserved Plasmodium protein, unknown function		31.37	20.16	18.35	1.64	5.45	28.75	29.64	31.3748	77.22	72.46	53.23	30	41.23	54.94	53.35	0	0	0	1
PGAL8A_00120600	621	28.464	381	0.613527	0.1229	0.3703	0.2192	783	207	562	PF3D7_0827400	conserved Plasmodium protein, unknown function		9.22	2.78	5.14	5.82	63.1	1502	455.73	1502	56	38.45	24.82	52.52	84.66	98.46	96.17	0	1	1	0
PGAL8A_00120700	927	48.675	615	0.66343	0.0357	0.0564	0.0368	3038	2408	3482	PF3D7_0827500	apicoplast ribosomal protein L21 precursor, putative		5.27	2.42	30.63	4.94	6.13	100.5	57.38	100.504	42.81	36.28	65.78	49.11	44.4	81.2	68.18	0	1	0	0
PGAL8A_00120800	4638	52.114	1713	0.36934	0.1041	0.1214	0.1225	1040	1306	1617	PF3D7_0827600	conserved Plasmodium protein, unknown function		3.61	6.96	27.35	6.34	3.09	10.43	22.14	27.3488	31	53.49	62.96	54.08	26.99	26.97	46.43	0	0	0	1
PGAL8A_00120900	2256	9.38	573	0.253989	0.0544	0.1205	0.1313	2334	1316	1462	PF3D7_0827700	magnesium transporter, putative		2.17	0.31	0.38	0	1.55	16.29	5.43	16.293	12.74	8.1	6.53	5.14	14.49	38.57	23.63	0	0	0	1
PGAL8A_00121000	6501	46.772	2325	0.357637	0.033	0.0345	0.0263	3167	2897	3775	PF3D7_0827800	SET domain protein, putative	KMT1	30.49	10.37	31.66	18.98	10.98	42.02	70.35	70.3453	76.96	60.59	66.42	73.71	58.01	64.62	72.91	0	0	0	1
PGAL8A_00121100	1449	3234.52	1314	0.906832	0.0362	0.0211	0.0186	3012	3234	3961	PF3D7_0827900	protein disulfide isomerase	PfPDI	426.61	808.86	1787.84	938.01	590.07	185.26	597.43	1787.84	97.37	97.52	98.84	98.34	96.75	89.06	97.27	1	1	1	0
PGAL8A_00121200	804	7.221	528	0.656716	0.0424	0.1992	0.0733	2774	645	2561	PF3D7_0828000	rhomboid protease ROM3		1.95	0.49	2.46	0	41.85	618.88	358.48	618.876	10.07	13.58	17.12	5.14	79.54	96.66	94.48	0	1	1	0
PGAL8A_00121300	2826	7.299	1074	0.380042	0.1395	0.2786	0.3078	578	354	221	PF3D7_0828100	conserved Plasmodium protein, unknown function		3.4	3.89	4.3	0.57	3.83	36.09	10.37	36.0934	28.7	44.04	22.49	18.1	32.49	60.78	32.2	0	0	0	1
PGAL8A_00121400	4011	12.836	1905	0.474944	0.0749	0.1638	0.1457	1664	879	1244	PF3D7_0828200	leucine--tRNA ligase, putative // leucyl-tRNA synthetase, putative		6.41	13.88	16.18	4.23	4.82	12.19	52.87	52.8687	48.07	65.59	50.08	46.53	38.12	30.66	66.51	0	0	0	1
PGAL8A_00121500	1488	245.33	369	0.247984	0.0545	0.1723	0.0521	2331	816	3091	PF3D7_0828300	conserved Plasmodium protein, unknown function		6.42	19.83	46.73	34.19	4.31	15.19	21.93	46.7257	48.12	72.18	74.74	82.15	35.31	36.82	46.13	1	0	0	0
PGAL8A_00121600	1362	19.556	729	0.535242	0.0476	0.0481	0.074	2582	2588	2537	PF3D7_0828400	mitochondrial inner membrane protein OXA1, putative		1.77	1.34	9.25	3.15	2.05	6.13	3.95	9.2519	8.33	27.5	35.9	40.82	18.21	18.5	20.56	0	0	0	1
PGAL8A_00121700	1026	14.667	744	0.725146	0.084	0.1837	0.1915	1431	742	758	PF3D7_0828500	translation initiation factor eIF-2B subunit alpha, putative		2.43	0.69	47.5	20.28	26.5	73.76	24.47	73.7623	16.44	18.57	75.09	74.85	73.5	75.77	48.92	0	0	0	1
PGAL8A_00121900	1497	5.964	660	0.440882	0.0816	0.0636	0.0799	1484	2249	2410	PF3D7_0828600	folate transporter 1		3.03	0.21	32.91	26.33	54.7	166.73	19.36	166.734	24.39	5.12	67.13	78.76	83.02	88.06	43.34	0	1	0	0
PGAL8A_00122000	3261	15.214	798	0.24471	0.1077	0.1309	0.1772	980	1189	892	PF3D7_0828700	conserved Plasmodium protein, unknown function		3.2	0.18	5.49	4.45	3.97	42.37	68.11	68.1074	26.33	4.5	25.88	47.25	33.44	64.88	72.13	0	0	0	1
PGAL8A_00122100	2256	11.06	1083	0.480053	0.0484	0.0739	0.1217	2550	2044	1631	PF3D7_0828800	GPI-anchored micronemal antigen	PSOP9	3.53	2.15	23.9	14.45	5.51	36.73	337	337.004	30.26	34.1	59.84	69.4	41.47	61.07	94.2	0	0	1	0
PGAL8A_00122200	576	26.083	396	0.6875	0.0924	0.021	0.1066	1238	3237	1869	PF3D7_0828900	conserved Plasmodium protein, unknown function		4.68	0.43	48.81	41.61	17.93	48.99	162.98	162.982	39.13	11.93	75.68	84.59	67.72	67.91	86.76	1	0	1	0
PGAL8A_00122300	4875	34.724	2142	0.439385	0.1368	0.1868	0.2276	607	709	516	PF3D7_0829000	conserved Plasmodium membrane protein, unknown function		7.29	7.37	15.81	5.49	3.46	13.07	22.98	22.9766	51.12	54.49	49.39	51.19	29.7	32.51	47.19	0	0	0	1
PGAL8A_00122400	651	37.435	315	0.483871	0.0425	0.001	0.0365	2768	3526	3490	PF3D7_0829100	conserved protein, unknown function		33.83	34.35	36.03	13.54	52.2	32.31	128.95	128.952	78.4	80.09	69.26	68.26	82.41	58.04	83.31	1	1	1	0
PGAL8A_00122500	819	299.876	813	0.992674	0.0147	0.014	0.0077	3842	3366	4139	PF3D7_0829200	prohibitin, putative		26.38	69.9	44.71	5.38	103.79	210.92	112.75	210.917	74.5	87.8	73.98	50.68	89.29	90.43	81.48	1	1	1	0
PGAL8A_00122600	288	89.945	243	0.84375	0.0125	0.001	0.001	3913	3526	4217	PF3D7_0829300	U6 snRNA-associated Sm-like protein LSm8, putative		22.47	28.91	67.72	17.35	61.48	130.93	184.61	184.608	71.92	77.77	81.6	72.27	84.39	85.15	88.26	1	1	1	0
PGAL8A_00122700	1329	60.795	903	0.679458	0.0379	0.0559	0.0375	2948	2421	3467	PF3D7_0829400	prolyl 4-hydroxylase subunit alpha, putative		3.54	0.54	31.03	19.06	11.61	37.06	48.54	48.537	30.38	14.96	66.06	73.81	59.3	61.29	65	0	0	0	1
PGAL8A_00184900	492	44.752	264	0.536585	0.0195	0.001	0.0875	3675	3526	2245	PF3D7_0903000	conserved protein, unknown function		3.5	10.31	18.63	3.08	66.63	216.84	35.2	216.838	29.88	60.31	53.66	40.31	85.32	90.6	57.31	0	1	0	0
PGAL8A_00184800	606	94.099	474	0.782178	0.0238	0.0346	0.0814	3511	2893	2380	PF3D7_0903100	protein RER1, putative		27.91	22.9	17.92	3.88	27.04	377.99	11.54	377.989	75.61	74.68	52.59	44.79	73.76	94.84	33.88	0	1	0	0
PGAL8A_00184700	621	708.627	615	0.990338	0.0202	0.001	0.0263	3652	3526	3775	PF3D7_0903200	ras-related protein RAB7		37.99	224.08	587.83	197.83	388	162.34	85.62	587.83	80.2	94.43	96.8	94.76	95.53	87.68	76.53	1	1	0	0
PGAL8A_00415900	7239	71.143	4959	0.685039	0.0699	0.0415	0.064	1811	2720	2777	PF3D7_0903400	ATP-dependent RNA helicase DDX60, putative		87.13	48.82	21.05	3.9	2.69	10.24	12.13	87.1341	89.63	84.58	56.81	44.88	23.82	26.5	34.62	1	0	0	0
PGAL8A_00416000	4038	98.919	1059	0.262259	0.0736	0.0597	0.1081	1705	2339	1841	PF3D7_0903500	conserved Plasmodium protein, unknown function		41.88	33.47	33.57	14.57	3.18	6.49	17.51	41.8808	81.62	79.7	67.7	69.57	27.59	19.18	41.51	1	0	0	0
PGAL8A_00416300	4056	11.129	3075	0.758136	0.1067	0.0955	0.192	998	1647	755	PF3D7_0903800	LCCL domain-containing protein	LAP6	2.42	0.35	0.79	0.13	2.91	133.3	47.43	133.299	16.29	9.29	9.31	11.25	25.64	85.41	64.48	0	1	0	0
PGAL8A_00416400	396	241.318	303	0.765152	0.0356	0.001	0.0572	3044	3526	2959	PF3D7_0903900	60S ribosomal protein L32		467.37	788.71	464.44	150.67	1385.74	321.9	293.25	1385.74	97.61	97.47	96.02	93.34	98.29	93.72	93.05	1	1	1	0
PGAL8A_00416500	1020	75.41	657	0.644118	0.0536	0.1008	0.0121	2358	1571	4070	PF3D7_0904000	GTPase-activating protein, putative		180.83	115.87	90.13	24.55	54.94	177.6	292.71	292.715	94.27	91.41	85.34	77.7	83.04	88.64	93.02	1	1	1	0
PGAL8A_00416600	3720	64.96	2388	0.641935	0.0572	0.0588	0.0681	2241	2359	2669	PF3D7_0904100	AP-4 complex subunit epsilon, putative		14.98	21.16	36.61	9.73	8.74	31.38	34.25	36.6132	64.79	73.12	69.71	62.44	52.81	57.28	56.57	0	0	0	1
PGAL8A_00416700	897	32.422	381	0.424749	0.0203	0	0.0597	3647	4212	2893	PF3D7_0904200	PH domain-containing protein, putative		3.92	0.9	0.84	0	109.47	1867.71	2167.94	2167.94	33.53	21.91	9.73	5.14	89.68	98.75	99.55	0	1	1	0
PGAL8A_00416800	8085	1.317	3516	0.434879	0.1322	0.2019	0.2633	654	624	352	PF3D7_0904300	conserved protein, unknown function		1.8	0.2	0.4	0.35	2.31	12.97	2.44	12.9742	8.74	4.83	6.72	15.08	20.5	32.21	16.93	0	0	0	1
PGAL8A_00416900	561	33.177	465	0.828877	0.0352	0.1231	0.0762	3063	1277	2488	PF3D7_0904400	signal peptidase complex subunit 3, putative	SPC22	4.68	4.55	50.44	25.28	50.45	132.2	25.07	132.202	39.13	46.58	76.34	78.16	81.91	85.27	49.54	0	1	0	0
PGAL8A_00417000	390	28.237	282	0.723077	0.1081	0.0637	0.1542	973	2248	1126	PF3D7_0904500	prefoldin subunit 4, putative		8.3	13.01	23	5.28	38.63	145.65	39.46	145.654	53.73	64.36	58.92	50.28	78.69	86.5	60.08	0	1	0	0
PGAL8A_00417100	4854	72.876	1581	0.325711	0.0432	0.1363	0.137	2741	1137	1364	PF3D7_0904600	ubiquitin specific protease, putative		32.56	36.8	46.88	17.26	22.42	32.29	29.49	46.8839	77.77	81.17	74.88	72.18	70.95	57.95	53.23	1	0	0	0
PGAL8A_00417200	567	71.367	342	0.603175	0.1527	0.001	0.0566	453	3526	2971	PF3D7_0904700	bacterial histone-like protein	PfHU	4.4	2.23	41.43	13.92	19.68	54.93	98.18	98.1848	37.36	34.87	72.51	68.72	69.24	70.21	79.08	0	0	0	1
PGAL8A_00417300	1455	76.453	1272	0.874227	0.0136	0.0434	0.0501	3880	2679	3137	PF3D7_0904800	replication protein A1, small fragment	RPA1S	5.02	10.84	66.96	20.6	4.23	16.06	25.96	66.9638	41.48	61.31	81.48	75.16	34.78	38.15	50.37	1	0	0	0
PGAL8A_00417400	5607	36.968	2493	0.444623	0.0742	0.144	0.172	1683	1058	934	PF3D7_0904900	copper-transporting ATPase	CUP	4.14	4.31	68.45	18.38	5.98	6.33	21.6	68.4529	35.38	45.65	81.74	73.26	43.55	18.92	45.82	1	0	0	0
PGAL8A_00417500	801	57.786	576	0.719101	0.076	0.2107	0.0898	1630	575	2203	PF3D7_0905000	conserved Plasmodium protein, unknown function		2.22	0.66	5.64	2.43	44.07	99.92	6.62	99.9159	13.4	17.59	26.29	36.18	80.3	81.08	25.69	0	1	0	0
PGAL8A_00417600	5568	59.744	2781	0.499461	0.047	0.0347	0.0481	2617	2891	3180	PF3D7_0905100	nucleoporin NUP100/NSP100, putative		39.67	48.33	82.93	27.59	5.03	13.81	16.11	82.9269	80.91	84.35	84.32	79.42	39.33	34.19	39.67	1	0	0	0
PGAL8A_00417700	3099	20.157	1386	0.447241	0.0978	0.1016	0.1493	1145	1561	1191	PF3D7_0905200	mitochondrial carrier protein, putative		9.42	8.37	5.81	1.47	3.6	5.22	6.22	9.4239	56.55	56.59	26.92	28.35	31	16.98	24.92	0	0	0	1
PGAL8A_00417800	17376	14.829	11961	0.688363	0.0293	0.0133	0.0332	3299	3382	3590	PF3D7_0905300	dynein heavy chain, putative		2.89	0.34	0.89	0.61	1.11	8.71	4.42	8.713	22.55	9.09	10.18	18.66	11.41	23.63	21.65	0	0	0	1
PGAL8A_00417900	2748	1293.53	1974	0.718341	0.2913	0.0696	0.2083	70	2142	636	PF3D7_0905400	high molecular weight rhoptry protein 3		20.89	3.97	1027.6	1556.07	30.9	4.28	334.46	1556.07	70.54	44.31	98.08	98.79	75.82	15.32	94.08	1	0	1	0
PGAL8A_00418000	714	15.865	537	0.752101	0.002	0.001	0.0725	4212	3526	2584	PF3D7_0905500	conserved Plasmodium protein, unknown function		3.33	0.33	28.8	41.23	34.98	105.82	7.77	105.823	28.09	8.76	64.32	84.33	77.38	81.81	27.71	1	1	0	0
PGAL8A_00418100	3456	8.292	2055	0.594618	0.1495	0.0675	0.1151	482	2189	1731	PF3D7_0905600	WD repeat-containing protein 66, putative		2.56	0.56	0.65	0	2.34	8.73	1.91	8.733	18.05	15.62	8.4	5.14	20.77	23.68	15.98	0	0	0	1
PGAL8A_00418300	4608	78.712	930	0.201823	0.2198	0.0917	0.2227	166	1713	543	PF3D7_0905800	conserved Plasmodium protein, unknown function		20.74	28.75	14.26	3.6	2.54	9.55	6.23	28.7468	70.42	77.7	46.56	43.12	22.5	25.24	24.98	0	0	0	1
PGAL8A_00418400	3084	103.555	2232	0.723735	0.0216	0.0293	0.0257	3585	3049	3791	PF3D7_0905900	coatomer subunit beta, putative		29.74	8.55	23.82	5.81	2.39	12.59	20.76	29.7366	76.63	57	59.77	52.5	21.24	31.52	44.92	0	0	0	1
PGAL8A_00418600	4851	21.43	1956	0.403216	0.0563	0.103	0.2016	2270	1540	669	PF3D7_0906000	exoribonuclease II		3.33	9.95	6.67	1.47	2.18	9.22	6.23	9.9518	27.96	59.7	29.44	28.37	19.29	24.53	24.96	0	0	0	1
PGAL8A_00418700	576	37.857	492	0.854167	0.0464	0.001	0.0313	2637	3526	3641	PF3D7_0906100	vacuolar protein sorting-associated protein 46, putative		4.79	12.68	210.21	192.44	588.01	167	152.29	588.006	39.9	63.86	92.45	94.65	96.69	88.09	85.77	1	1	1	0
PGAL8A_00418800	1443	10.549	777	0.538462	0.1482	0.1078	0.2415	490	1474	435	PF3D7_0906200	conserved Plasmodium protein, unknown function		3.06	2.92	6.77	1.18	3.04	12.67	3.22	12.6681	24.81	39.26	29.77	25.26	26.67	31.63	18.99	0	0	0	1
PGAL8A_00418900	1236	3.558	618	0.5	0.0807	0.1065	0.0824	1504	1495	2364	PF3D7_0906300	Maf-like protein, putative		6.96	3.52	6.37	1.35	2.28	29.64	18.23	29.6381	50.03	42.27	28.61	27.27	20.15	55.6	42.27	0	0	0	1
PGAL8A_00419000	2130	30.82	948	0.44507	0.0584	0.0949	0.1506	2194	1662	1167	PF3D7_0906400	dynein intermediate light chain, putative		5.48	1.01	1.9	0.12	4.02	59.46	53.98	59.4576	44.05	23.56	14.99	11.06	33.77	71.89	67.01	0	0	0	1
PGAL8A_00419100	1134	30.46	939	0.828042	0.0222	0.0858	0.135	3568	1822	1405	PF3D7_0906500	arginase		83.27	204.39	51.2	13.08	45.29	66.27	179.99	204.386	89.2	94.03	76.65	67.49	80.6	74.03	88.04	1	1	1	0
PGAL8A_00419200	1554	278.642	837	0.53861	0.0102	0.0088	0.0359	3990	3469	3511	PF3D7_0906600	zinc finger protein, putative		253.84	210.82	47.74	6.38	5.99	28.29	97.25	253.838	95.72	94.18	75.18	54.23	43.71	54.42	78.86	1	0	0	0
PGAL8A_00419500	312	8.9	159	0.509615	0.1448	0.001	0.211	519	3526	616	PF3D7_0906890	conserved Plasmodium protein, unknown function		3.98	7.93	6.47	0	9.16	17.08	0	17.0793	34.02	55.84	29.01	5.14	53.89	40.32	6.4	0	0	0	1
PGAL8A_00419600	738	31.508	537	0.727642	0.0382	0.0961	0.1201	2936	1636	1648	PF3D7_0906910	tubulin-specific chaperone, putative		34.13	24.32	25.45	1.49	54.5	242.4	37.24	242.403	78.54	75.52	61.19	28.56	82.95	91.54	58.65	0	1	0	0
PGAL8A_00419700	237	41.171	174	0.734177	0.0913	0.1059	0.1582	1264	1504	1081	PF3D7_0907000	conserved Plasmodium protein, unknown function		32.65	18.6	30.14	4.84	64.72	103.72	40.3	103.718	77.88	70.86	65.43	48.64	84.96	81.63	60.59	0	1	0	0
PGAL8A_00419800	4443	24.019	1503	0.338285	0.1548	0.2925	0.2067	436	322	646	PF3D7_0907100	conserved Plasmodium protein, unknown function		5.6	1.26	6.53	0.83	4.15	20.91	48.51	48.5059	44.54	26.64	29.17	21.31	34.29	45.95	64.98	0	0	0	1
PGAL8A_00419900	2970	30.541	1158	0.389899	0.0289	0.033	0.0627	3313	2943	2807	PF3D7_0907200	GTPase-activating protein, putative		61.34	10.19	20.54	21.17	4.01	35.67	51.41	61.338	86.43	60.12	56.22	75.63	33.65	60.36	65.93	1	0	0	0
PGAL8A_00420000	840	44.876	318	0.378571	0.0577	0.0592	0.0894	2218	2349	2210	PF3D7_0907300	conserved Plasmodium protein, unknown function		15.85	8.98	9	1.89	21.37	21.46	3.6	21.4583	65.71	57.83	35.28	31.95	70.23	46.91	19.96	0	0	0	1
PGAL8A_00420100	2415	140.205	1479	0.612422	0.0298	0.0132	0.0419	3262	3386	3336	PF3D7_0907400	ATP-dependent protease ATPase subunit ClpY		39.89	45.79	112.75	51.27	14.18	28.74	140.47	140.469	80.96	83.64	87.85	86.45	63.27	54.92	84.56	1	0	1	0
PGAL8A_00420300	2430	67.266	1524	0.62716	0.0649	0.1226	0.1105	1970	1285	1800	PF3D7_0907600	translation initiation factor SUI1, putative		14.57	5.84	10.35	3.83	3.36	17.28	56.94	56.9447	64.39	50.65	38.53	44.38	28.96	40.57	68.08	0	0	0	1
PGAL8A_00420400	831	105.757	735	0.884477	0.0207	0.001	0.0214	3627	3526	3898	PF3D7_0907700	proteasome activator 28 subunit beta, putative		142.79	62.21	105.12	20.29	8.64	61.74	99.94	142.788	93.39	86.84	87.03	74.87	52.62	72.82	79.41	1	0	0	0
PGAL8A_00420500	459	17.995	252	0.54902	0.0614	0.001	0.1409	2083	3526	1308	PF3D7_0907800	ribosomal protein L35, apicoplast, putative		24.47	4.96	54.15	20.92	103.67	1173.51	293.92	1173.51	73.38	47.99	77.7	75.4	89.25	98.11	93.13	0	1	1	0
PGAL8A_00420600	708	31.499	570	0.805085	0.108	0.0537	0.0667	975	2462	2709	PF3D7_0907900	peptide deformylase	PfPDF	13.23	46.64	87.05	36.03	66.04	126.58	80.94	126.579	62.64	83.9	84.91	82.78	85.18	84.66	75.51	1	1	0	0
PGAL8A_00420700	1173	51.907	849	0.723785	0.0393	0.0647	0.0516	2893	2232	3105	PF3D7_0908000	P1 nuclease, putative		5.01	2.41	55.91	44.17	19.08	46.18	7.83	55.913	41.34	36.2	78.29	85.15	68.74	66.66	27.83	1	0	0	0
PGAL8A_00420800	1542	6.173	666	0.431907	0.2029	0.9292	0.2685	214	23	338	PF3D7_0908100	conserved Plasmodium membrane protein, unknown function		2.48	0.22	5.75	3.49	25.28	57.44	1.96	57.444	16.91	5.42	26.73	42.58	72.68	71.11	16.05	0	0	0	1
PGAL8A_00420900	4233	16.768	2064	0.487597	0.0649	0.1998	0.2022	1970	640	665	PF3D7_0908200	conserved Plasmodium protein, unknown function		2.17	0.37	16.9	9.3	3.51	12.29	9.29	16.9025	12.69	10.07	51.24	61.52	30.05	31	30.16	0	0	0	1
PGAL8A_00421400	1932	57.443	954	0.493789	0.064	0.0103	0.0768	1998	3442	2472	PF3D7_0908600	ribosomal RNA methyltransferase, putative		12.19	6.45	7.88	1.16	1.08	5.92	21.12	21.1155	61.25	52.12	32.54	24.86	11.15	18.05	45.37	0	0	0	1
PGAL8A_00421500	882	3.88	549	0.622449	0.035	0.0908	0.0794	3072	1733	2426	PF3D7_0908700	tRNA pseudouridine synthase, putative		5	3.8	9.64	4.7	12.41	25.81	5.96	25.8085	41.3	43.74	37.01	48.07	60.45	51.74	24.46	0	0	0	1
PGAL8A_00421600	1527	4.09	951	0.62279	0.0306	0.0558	0.0465	3236	2423	3223	PF3D7_0908800	mitochondrial carrier protein, putative		20.61	20.75	29.52	9.45	9.37	11.65	11.84	29.5188	70.3	72.88	64.95	61.83	54.27	29.5	34.26	0	0	0	1
PGAL8A_00421700	2181	3.83	876	0.401651	0.1053	0.1498	0.2557	1020	1006	383	PF3D7_0908900	conserved Plasmodium protein, unknown function		5.52	6.24	8.12	1.97	2.13	10.48	10.3	10.4787	44.26	51.51	33.22	32.67	18.89	27.09	32.09	0	0	0	1
PGAL8A_00421800	2424	4.69	1188	0.490099	0.0876	0.1146	0.1169	1347	1389	1702	PF3D7_0909000	conserved Plasmodium protein, unknown function		1.65	0.23	2.22	0.29	3.98	63.99	75.96	75.9648	7.22	5.78	16.29	13.9	33.53	73.5	74.28	0	0	0	1
PGAL8A_00421900	1797	1.436	834	0.464107	0.1116	0.1087	0.1754	901	1465	902	PF3D7_0909100	conserved Plasmodium membrane protein, unknown function		2.39	0.25	6.35	3.82	12.58	98.46	21.97	98.4588	15.87	6.21	28.56	44.33	60.79	80.86	46.18	0	1	0	0
PGAL8A_00422000	1413	1.514	1023	0.723992	0.1567	0.1858	0.1958	420	719	716	PF3D7_0909200	GDP-fucose protein O-fucosyltransferase 2, putative		2.3	0.34	1.58	0.21	6.4	81.47	2.98	81.4681	14.45	8.99	13.71	12.36	45.61	77.67	18.38	0	0	0	1
PGAL8A_00422100	396	75.25	192	0.484848	0.0208	0.001	0.001	3620	3526	4217	PF3D7_0909300	apoptosis-related protein	PfARP	81.45	53.46	72.52	20.04	156.07	105.99	49.46	156.069	89.04	85.58	82.59	74.68	92.02	81.84	65.31	1	1	0	0
PGAL8A_00422200	3657	76.081	2370	0.648072	0.0476	0.0289	0.0558	2582	3062	2992	PF3D7_0909400	exoribonuclease, putative		47.84	36.44	51.16	12.1	4.25	28.62	16.35	51.16	83.51	81.08	76.63	66.11	34.86	54.75	40.11	1	0	0	0
PGAL8A_00422300	1275	24.537	708	0.555294	0.033	0.0489	0.0486	3167	2576	3168	PF3D7_0909500	subpellicular microtubule protein 1, putative		5.47	0.7	42.32	184.54	24.91	67	237.95	237.948	44.01	18.64	72.84	94.37	72.41	74.21	90.69	1	0	1	0
PGAL8A_00422400	1653	94.074	1125	0.680581	0.2051	0.1288	0.094	203	1211	2114	PF3D7_0909600	conserved Plasmodium protein, unknown function		5.75	1.79	46.88	27.53	9.45	47.64	25.44	47.6405	45.19	31.69	74.87	79.38	54.58	67.47	49.84	0	0	0	1
PGAL8A_00422500	3735	26.055	1305	0.349398	0.027	0.0287	0.0733	3387	3066	2561	PF3D7_0909700	FHA domain protein, putative		49.53	9.66	20.42	10.77	11.24	60.45	93.1	93.0956	84.01	59.18	56.03	64.15	58.49	72.3	78.15	1	0	0	0
PGAL8A_00422600	351	101.255	330	0.940171	0.0145	0.001	0.0607	3849	3526	2861	PF3D7_0909800	small nuclear ribonucleoprotein Sm D3, putative	SMD3	70.78	33.66	38.68	5.02	57.96	52.47	59.79	70.7817	87.71	79.83	70.92	49.39	83.76	69.43	69.08	1	1	0	0
PGAL8A_00422700	3996	52.203	2694	0.674174	0.0474	0.0213	0.0293	2592	3228	3687	PF3D7_0909900	helicase SKI2W, putative		16.01	8.93	17.21	3.85	3.39	8.35	4.75	17.2088	65.86	57.69	51.6	44.6	29.22	22.8	22.47	0	0	0	1
PGAL8A_00422800	3180	1.954	1428	0.449057	0.1847	0.2025	0.1732	276	622	925	PF3D7_0910000	SET domain protein, putative	PfSET4	4.62	0.52	2.29	1.67	1.41	3.04	0	4.6186	38.83	14.37	16.6	30.26	13.48	13.17	6.4	0	0	0	1
PGAL8A_00422900	3564	38.783	2739	0.768519	0.0072	0.0037	0.0104	4084	3516	4099	PF3D7_0910100	exportin-7, putative		25.34	11.84	78.04	28.27	8.71	7.2	9.34	78.0356	74	62.71	83.62	79.8	52.78	20.48	30.28	1	0	0	0
PGAL8A_00423000	6927	118.361	1521	0.219576	0.1108	0.3058	0.1973	917	294	703	PF3D7_0910200	conserved Plasmodium protein, unknown function		9.84	7.16	20.47	9.67	6.3	11.11	18.84	20.4699	57.35	53.99	56.15	62.23	45.27	28.34	42.76	0	0	0	1
PGAL8A_00423100	1281	15.69	774	0.604215	0.0347	0.001	0.0612	3086	3526	2846	PF3D7_0910300	conserved Plasmodium protein, unknown function		16.39	15.99	12.29	6.11	9.99	23.73	9.69	23.7304	66.44	68.24	43	53.47	55.82	49.78	30.79	0	0	0	1
PGAL8A_00423200	3267	13.397	2034	0.62259	0.0657	0.0746	0.1279	1947	2029	1520	PF3D7_0910400	selenide water dikinase, putative		5.07	7.44	14.86	9.85	3.01	10.12	6.64	14.8638	41.72	54.67	47.95	62.77	26.42	26.29	25.75	0	0	0	1
PGAL8A_00423400	600	8.824	498	0.83	0.0409	0.042	0.1182	2840	2711	1679	PF3D7_0910600	SNARE protein		8	12.42	34.15	19.1	62.87	250.9	39.64	250.905	52.99	63.44	68.15	73.86	84.58	91.99	60.15	0	1	0	0
PGAL8A_00423500	1617	5.108	1155	0.714286	0.0472	0.0762	0.1388	2606	2005	1345	PF3D7_0910700	actin-like protein, putative		2.3	0.73	1.06	0	1.35	8.43	14.57	14.5743	14.51	19.18	11.15	5.14	13.09	23.01	37.86	0	0	0	1
PGAL8A_00423600	1296	68.115	915	0.706019	0.0433	0.0304	0.0899	2738	3021	2202	PF3D7_0910800	cytosolic Fe-S cluster assembly factor NBP35, putative		17.63	27.85	33.55	25.15	6.14	4.04	11.45	33.5531	67.84	77.41	67.68	78.07	44.43	14.96	33.75	0	0	0	1
PGAL8A_00423700	1623	55.346	1443	0.889094	0.0331	0.0389	0.0506	3163	2787	3127	PF3D7_0910900	DNA primase large subunit, putative		2.71	0.93	35.91	8.71	5.02	7.6	11.23	35.9133	20.21	22.42	69.22	60.33	39.28	21.19	33.43	0	0	0	1
PGAL8A_00423800	921	19.576	540	0.586319	0.0624	0.0655	0.0829	2047	2221	2348	PF3D7_0911000	phosphatidylinositol N-acetylglucosaminyltransferase, putative		2.38	0.27	44.94	14.38	78.19	102.67	77.99	102.671	15.68	6.78	74.09	69.36	87.05	81.44	74.78	0	1	0	0
PGAL8A_00423900	2892	17.068	1353	0.467842	0.0626	0.0408	0.1428	2042	2738	1280	PF3D7_0911100	conserved Plasmodium protein, unknown function		2.39	0.39	12.75	10.92	2.64	23.78	62.8	62.797	15.84	10.71	44.04	64.34	23.33	49.84	70.28	0	0	0	1
PGAL8A_00424000	615	23.906	333	0.541463	0.0538	0.0226	0.2047	2353	3202	653	PF3D7_0911200	conserved Plasmodium protein, unknown function		1.93	1.47	21.33	6.43	42.4	416.63	7.07	416.632	9.96	29.05	57.11	54.31	79.7	95.24	26.66	0	1	0	0
PGAL8A_00424100	9075	0.155	5754	0.63405	0.1161	0.121	0.1937	852	1310	740	PF3D7_0911300	cysteine repeat modular protein 1	PfCRMP1	1.45	0.26	0.66	0.12	0.52	1.8	2.26	2.2584	5.97	6.65	8.5	11.08	7.82	10.99	16.69	0	0	0	1
PGAL8A_00424200	3456	4.577	2058	0.595486	0.1096	0.1041	0.2325	936	1526	483	PF3D7_0911400	conserved Plasmodium protein, unknown function		4.88	9.45	5.54	0.64	3.34	16.7	8.03	16.6995	40.42	58.82	26.03	19.11	28.8	39.61	28.13	0	0	0	1
PGAL8A_00424400	1218	83.347	498	0.408867	0.1333	0.075	0.2103	645	2026	623	PF3D7_0911600	conserved Plasmodium protein, unknown function		2.93	0.41	26.79	8.82	4.88	32.57	49.28	49.2845	23.07	11.58	62.49	60.59	38.43	58.2	65.28	0	0	0	1
PGAL8A_00424500	2589	36.965	1719	0.663963	0.0212	0.0759	0.0411	3606	2011	3364	PF3D7_0911700	GTP-binding protein, putative		4.93	5.96	11.21	4.33	1.35	1.19	15.89	15.8894	40.8	50.98	40.42	46.89	13.1	9.26	39.4	0	0	0	1
PGAL8A_00424600	783	11.383	306	0.390805	0.1576	0.2493	0.1015	413	426	1985	PF3D7_0911800	conserved Plasmodium protein, unknown function		43.09	3.15	21.39	12.38	9.13	39.08	1.68	43.0868	82.1	40.3	57.21	66.56	53.78	62.49	15.4	1	0	0	0
PGAL8A_00424700	1653	430.805	546	0.330309	0.3616	0.3024	0.1658	31	300	1006	PF3D7_0911900	falstatin // inhibitor of cysteine proteases	PfICP	534.13	142.43	182.87	129.44	168.59	109.74	100.26	534.128	97.91	92.61	91.69	92.63	92.5	82.45	79.49	1	1	0	0
PGAL8A_00424800	4215	20.686	1881	0.446263	0.1662	0.2402	0.1874	363	453	789	PF3D7_0912000	conserved Plasmodium protein, unknown function		9.71	5.34	11.14	3	1.8	12.05	4.16	12.0475	57.09	49.09	40.3	39.83	16.43	30.41	21.15	0	0	0	1
PGAL8A_00424900	1422	20.883	732	0.514768	0.0623	0.1426	0.0855	2050	1071	2287	PF3D7_0912100	zinc finger protein, putative		23.65	49.15	27.87	27.09	29.39	45.42	31.16	49.1458	72.72	84.66	63.51	79.14	75.13	66.28	54.41	1	0	0	0
PGAL8A_00425000	1299	2.828	477	0.367206	0.1155	0.382	0.1614	859	195	1048	PF3D7_0912200	conserved Plasmodium membrane protein, unknown function		28.13	1.86	3.38	1.29	14.45	354.15	81.15	354.154	75.71	32.23	19.91	26.54	63.68	94.34	75.56	0	1	0	0
PGAL8A_00425100	1335	40.664	954	0.714607	0.0234	0.038	0.2267	3524	2809	523	PF3D7_0912400	alkaline phosphatase, putative		26.93	85.26	148.01	41.2	78.4	52.19	33.39	148.013	74.92	89.37	90.27	84.32	87.07	69.24	55.98	1	1	0	0
PGAL8A_00425200	909	111.342	435	0.478548	0.0446	0.1629	0.134	2696	889	1417	PF3D7_0912500	SAP domain-containing protein, putative		94.64	97.03	103.65	24.75	56.7	92.24	35.5	103.647	90.44	90.36	86.95	77.79	83.52	79.64	57.52	1	1	0	0
PGAL8A_00425300	3309	2.437	615	0.185857	0.0855	0.1505	0.2274	1398	996	518	PF3D7_0912600	conserved Plasmodium protein, unknown function		8.63	1.6	1.48	0.22	1.86	16.25	21.6	21.5963	54.53	30.33	13.21	12.52	16.86	38.5	45.8	0	0	0	1
PGAL8A_00425400	249	26.822	87	0.349398	0.0386	0.001	0.0236	2919	3526	3850	PF3D7_0912700	conserved Plasmodium protein, unknown function		10.92	4.3	4.47	1.14	218.66	1821.51	1643.17	1821.51	58.98	45.61	22.94	24.66	93.58	98.68	99.38	0	1	1	0
PGAL8A_00425500	1881	18.673	828	0.440191	0.0572	0.0199	0.0666	2241	3264	2713	PF3D7_0912800	tRNA (adenine(58)-N(1))-methyltransferase non-catalytic subunit TRM6, putative		19.57	24.25	16.98	5.4	3.8	16.6	11.34	24.2456	69.33	75.51	51.39	50.79	32.28	39.4	33.59	0	0	0	1
PGAL8A_00425600	1065	386.83	690	0.647887	0.0021	0.001	0.0065	4209	3526	4160	PF3D7_0912900	26S proteasome regulatory subunit RPN8, putative		86.43	42.34	127.68	46.24	45.63	94.27	144.45	144.453	89.54	82.79	88.97	85.53	80.65	80.06	84.96	1	1	1	0
PGAL8A_00425700	456	24.561	237	0.519737	0.056	0.001	0.0663	2279	3526	2726	PF3D7_0913000	conserved protein, unknown function		87.93	146.26	102.86	10.59	420.81	149.34	63.02	420.811	89.75	92.78	86.82	63.91	95.74	86.74	70.37	1	1	0	0
PGAL8A_00425800	2424	12.89	1014	0.418317	0.0665	0.0965	0.1715	1910	1629	939	PF3D7_0913100	conserved Plasmodium protein, unknown function		2.43	2.02	4.9	0.63	0.66	5.31	1.21	5.3087	16.39	33.18	24.18	19.03	8.64	17.08	14.18	0	0	0	1
PGAL8A_00426000	813	595.374	543	0.667897	0.0574	0.1297	0.0636	2232	1198	2791	PF3D7_0913200	elongation factor 1-beta	PfEF-1beta	181.01	162.4	169.63	27.94	30.7	47.01	107.76	181.015	94.29	93.23	91.26	79.57	75.75	67.18	80.73	1	0	1	0
PGAL8A_00426100	1755	31.291	777	0.442735	0.1041	0.0104	0.0895	1040	3436	2208	PF3D7_0913300	conserved Plasmodium protein, unknown function		92.18	28.88	29.93	19.84	2.49	12.93	32.44	92.1799	90.17	77.74	65.24	74.45	22.12	32.18	55.24	1	0	0	0
PGAL8A_00426200	522	15.266	420	0.804598	0.0158	0.0821	0.056	3807	1881	2988	PF3D7_0913400	conserved Plasmodium protein, unknown function		5.35	3.6	9.58	1.74	32.97	153.72	273.2	273.204	43.39	42.55	36.8	30.7	76.75	87.12	92.26	0	1	1	0
PGAL8A_00426300	1290	5.025	747	0.57907	0.0694	0.055	0.1427	1825	2436	1285	PF3D7_0913500	protease, putative		9.4	1.22	20.78	6.56	35.05	92.76	24.77	92.7578	56.5	26.14	56.48	54.75	77.41	79.73	49.23	0	0	0	1
PGAL8A_00426400	3183	7.236	807	0.253534	0.1234	0.2068	0.1432	777	595	1275	PF3D7_0913600	conserved Plasmodium protein, unknown function		2.57	1.18	13.09	4.06	3.63	30.4	55.27	55.2688	18.12	25.75	44.63	45.58	31.16	56.43	67.58	0	0	0	1
PGAL8A_00426500	1761	104.484	1104	0.626917	0.075	0.0306	0.0548	1662	3015	3018	PF3D7_0913700	conserved Plasmodium protein, unknown function		6.38	14.62	32.29	12.17	3.72	29.23	154.05	154.046	47.91	66.52	66.82	66.25	31.68	55.27	86.01	0	0	1	0
PGAL8A_00426700	2610	20.628	1110	0.425287	0.1737	0.1568	0.2104	326	942	621	PF3D7_0913900	arginine--tRNA ligase, putative		4.09	4.51	5.55	0.31	2.14	27.97	17.29	27.9651	34.95	46.41	26.07	14.14	18.9	54.15	41.15	0	0	0	1
PGAL8A_00426800	2304	23.777	1263	0.548177	0.0624	0.1011	0.0923	2047	1566	2147	PF3D7_0914000	pseudouridylate synthase, putative		12.23	12.19	6.66	1.02	3.91	15.21	23.9	23.9043	61.29	63.15	29.39	23.68	33.13	36.87	48.24	0	0	0	1
PGAL8A_00426900	2997	23.038	804	0.268268	0.1355	0.2327	0.2092	619	484	628	PF3D7_0914100	conserved Plasmodium protein, unknown function		4.17	0.95	21.55	59.02	6.85	28.08	209.81	209.81	35.64	22.65	57.47	87.52	47.15	54.25	89.49	1	0	1	0
PGAL8A_00427000	864	51.096	813	0.940972	0.0358	0.0331	0.0993	3030	2940	2018	PF3D7_0914200	phospholipid or glycerol acyltransferase, putative		39.28	33.81	52.18	17.54	21.52	27.15	43.41	52.1764	80.73	79.9	77.08	72.56	70.31	53.14	62.45	1	0	0	0
PGAL8A_00427200	2112	24.71	1164	0.551136	0.0771	0.078	0.1492	1598	1966	1194	PF3D7_0914300	met-10+ like protein, putative		17.58	12.47	10.77	1.38	4.27	11.16	4.77	17.576	67.72	63.55	39.38	27.59	35	28.42	22.52	0	0	0	1
PGAL8A_00427300	750	157.434	744	0.992	0.01	0.001	0.011	3998	3526	4089	PF3D7_0914400	conserved Plasmodium protein, unknown function		3.9	1.59	114	190.45	422.43	1933.05	447.72	1933.05	33.27	30.08	87.92	94.6	95.79	98.79	96.07	1	1	1	0
PGAL8A_00427400	4659	64.779	1182	0.253703	0.2155	0.1979	0.3503	177	656	150	PF3D7_0914500	conserved Plasmodium protein, unknown function		8.49	2.55	21.47	7.82	3.88	13.16	30.48	30.4804	54.16	37.23	57.42	58.3	32.92	32.7	53.83	0	0	0	1
PGAL8A_00427500	336	69.23	201	0.598214	0.0053	0.001	0.0162	4142	3526	4008	PF3D7_0914600	transcription elongation factor 1, putative		47.22	32.57	59.02	12.25	160.7	152.33	29.15	160.701	83.26	79.25	79.38	66.38	92.18	86.95	52.9	1	1	0	0
PGAL8A_00427600	1506	6.514	918	0.609562	0.0579	0.0426	0.1098	2209	2697	1814	PF3D7_0914700	major facilitator superfamily-related transporter, putative		115.76	46.98	118.42	64.43	96.14	60	25.26	118.422	92.16	84.02	88.33	88.3	88.59	72.13	49.66	1	1	0	0
PGAL8A_00427700	627	17.05	555	0.885167	0.0059	0.001	0.0801	4127	3526	2408	PF3D7_0914800	GINS complex subunit Psf3, putative		2.83	1.52	25.86	4.69	19.12	198.36	51.32	198.357	21.78	29.6	61.36	48	68.79	89.86	65.9	0	1	0	0
PGAL8A_00427800	2469	53.463	627	0.253949	0.0294	0.1269	0.19	3289	1229	770	PF3D7_0914900	BSD-domain protein, putative		5.73	3.65	17.58	7.31	3.15	22.71	56.49	56.4908	45.06	42.98	52.12	57.07	27.37	48.43	67.91	0	0	0	1
PGAL8A_00427900	1590	87.387	1143	0.718868	0.0352	0.0215	0.0971	3063	3223	2066	PF3D7_0915000	type II NADH:ubiquinone oxidoreductase	PfNDH2	4.3	0.89	42.99	48.62	8.51	32.61	96.94	96.9437	36.59	21.8	73.05	85.98	52.28	58.27	78.8	1	0	0	0
PGAL8A_00428000	480	131.55	474	0.9875	0.001	0.001	0.0077	4222	3526	4139	PF3D7_0915100	SUMO-conjugating enzyme UBC9		99.6	140.08	286.99	130.42	306.31	160.15	93.28	306.314	90.89	92.45	93.98	92.68	94.77	87.5	78.2	1	1	0	0
PGAL8A_00428100	870	22.478	465	0.534483	0.2129	0.0252	0.1211	185	3136	1637	PF3D7_0915200	ribonuclease H2 subunit C, putative		6.57	2.29	4.76	0.91	8.51	28.41	7.22	28.4107	48.73	35.42	23.73	22.36	52.25	54.54	26.87	0	0	0	1
PGAL8A_00428200	2049	16.865	1305	0.636896	0.0974	0.1535	0.2253	1155	972	532	PF3D7_0915300	conserved Plasmodium protein, unknown function		10.41	6.37	5.39	0.81	2.44	8.15	1.29	10.4098	58.21	51.88	25.6	21.19	21.53	22.43	14.5	0	0	0	1
PGAL8A_00428300	4179	90.437	3492	0.835607	0.0181	0.0077	0.0168	3725	3490	3998	PF3D7_0915400	ATP-dependent 6-phosphofructokinase	PfPFK9	282.86	161.02	214.03	35.28	7.65	6.01	35.82	282.856	96.11	93.21	92.54	82.6	49.94	18.25	57.75	1	0	0	0
PGAL8A_00428400	1899	14.933	777	0.409163	0.0908	0.2133	0.2825	1275	562	293	PF3D7_0915500	conserved Plasmodium protein, unknown function		1.15	0.91	0.99	0.15	0.88	3.11	0	3.1097	4.17	22.16	10.77	11.53	9.97	13.35	6.4	0	0	0	1
PGAL8A_00428500	621	11.451	153	0.246377	0.2005	0.001	0.1105	221	3526	1800	PF3D7_0915600	conserved Plasmodium protein, unknown function		9.75	8.85	3.79	1.23	9.05	35.15	9.76	35.1514	57.18	57.52	21.08	25.86	53.63	60.01	31.04	0	0	0	1
PGAL8A_00428600	573	172.334	513	0.895288	0.0265	0.0836	0.0376	3410	1859	3463	PF3D7_0915700	conserved Plasmodium protein, unknown function		4.58	1.25	29.6	11.86	152.99	106.8	100.64	152.994	38.64	26.55	64.98	65.8	91.9	81.98	79.57	0	1	0	0
PGAL8A_00428700	654	3.5	561	0.857798	0.0438	0.0307	0.1057	2715	3012	1896	PF3D7_0915800	glycolipid transfer protein, putative		2.39	0.24	4.03	2.7	62.89	799.21	190.4	799.21	15.93	6.05	21.72	38.02	84.59	97.4	88.63	0	1	1	0
PGAL8A_00428800	441	28.005	219	0.496599	0.0899	0.001	0.0984	1298	3526	2038	PF3D7_0915900	conserved Plasmodium protein, unknown function		10.83	12.03	15.6	4.69	10.98	58.82	94.95	94.9511	58.87	62.99	49.07	48.04	57.99	71.72	78.48	0	0	0	1
PGAL8A_00428900	3681	45.209	1254	0.340668	0.0371	0.0394	0.0712	2976	2773	2605	PF3D7_0916000	major facilitator superfamily domain-containing protein, putative		5.65	2.28	27.29	43.02	10.78	119.23	85.84	119.228	44.69	35.3	62.9	84.91	57.61	83.88	76.61	1	1	0	0
PGAL8A_00429000	534	21.419	453	0.848315	0.1196	0.1174	0.1938	816	1350	737	PF3D7_0916100	thioredoxin 3		9.8	2.92	18.19	6.5	47.59	39.1	72.15	72.1468	57.28	39.22	53.04	54.53	81.11	62.51	73.39	0	1	0	0
PGAL8A_00429100	3222	28.907	1500	0.465549	0.065	0.0331	0.0383	1966	2940	3442	PF3D7_0916200	conserved Plasmodium protein, unknown function		9.57	21.84	15.26	2.22	3.84	18.71	94.9	94.9048	56.85	73.78	48.55	34.65	32.61	42.84	78.47	0	0	0	1
PGAL8A_00429200	846	3.422	567	0.670213	0.0742	0.0644	0.0639	1683	2238	2781	PF3D7_0916300	conserved Plasmodium protein, unknown function		2.14	0.54	16.29	15.05	35.78	130.13	65.26	130.131	12.24	15.03	50.23	70.07	77.62	85.06	71.11	0	1	0	0
PGAL8A_00429300	5298	19.339	1323	0.249717	0.1544	0.2691	0.2388	442	380	447	PF3D7_0916400	conserved Plasmodium protein, unknown function		5.11	5.31	8.51	13.96	6.72	20.45	6.66	20.4516	41.87	49.02	34.08	68.79	46.81	45.28	25.81	0	0	0	1
PGAL8A_00429400	864	27.159	657	0.760417	0.0575	0.026	0.0687	2228	3116	2655	PF3D7_0916500	ubiquitin fusion degradation protein 1	PfsUfd1	8.08	9.08	37.4	7.26	34.56	44.06	7.85	44.0621	53.25	58.08	70.23	56.85	77.19	65.83	27.87	0	0	0	1
PGAL8A_00429500	648	11.229	414	0.638889	0.0423	0.001	0.0673	2778	3526	2691	PF3D7_0916600	methyltransferase, putative		11.23	2.16	0.87	0	5.5	30.84	42.4	42.3979	59.55	34.22	9.97	5.14	41.38	56.79	61.87	0	0	0	1
[truncated: 2,562 more rows]
