# Supplementary material for: Complete avian malaria parasite genomes reveal features associated with lineage-specific evolution in birds and mammals
Source: Genome Res. 2018 Apr;28(4):547–60. doi: 10.1101/gr.218123.116 (PMC5880244; doi:10.1101/gr.218123.116)
Supplement: Supplemental Material [file supp_gr.218123.116_Supplemental_Table_S9.xlsx]

## Sheet: Supplemental Table S9
Supplemental Table S9: Top 250 dN/dS values from pairwise comparisons within three lineages.
For all genes with 1:1 orthologues across P. gallinaceum (PGAL8A), P. relictum (PRELSG), P. falciparum (PF3D7), P. reichenowi (PRCDC), P. knowlesi (PKN) and P. vivax (PVX), dN/dS values were calculated and ranked in the avian (PGAL8A vs PRELSG), falciparum (PF3D7 vs PRCDC) and vivax (PKN vs PVX) clades. Only genes with an annotated function are listed. Quantiles of gene expression are from Plasmo…
			ranking based on dN/dS ratio (top 250 coloured)				ranked in the 80% percentile based on expression
orthologue in Pf3D7	product	gene name	PGAL8A vs PRELSG	PF3D7 vs PRCDC	PKN vs PVX	Number of highly ranked lineages	Intra-erythrocytic	Gametocyte	Ookinete	Other
PF3D7_0104000	thrombospondin-related sporozoite protein // sporozoite stage TSP1 domain protein	S21	17	198	96	3	0	1	0	0
PF3D7_0304600	circumsporozoite (CS) protein	PfCSP	99	241	46	3	1	1	0	0
PF3D7_0404100	AP2 domain transcription factor AP2-SP2, putative	ApiAP2	249	82	89	3	0	0	0	1
PF3D7_1031000	ookinete surface protein P25	Pfs25	14	118	216	3	0	1	1	0
PF3D7_1222600	AP2 domain transcription factor AP2-G	ApiAP2	230	172	31	3	0	0	0	1
PF3D7_1335900	thrombospondin-related anonymous protein // sporozoite surface protein 2	SSP2	176	6	219	3	0	0	0	1
PF3D7_0207000	merozoite surface protein 4		56	4212	161	2	1	1	1	0
PF3D7_0315000	zinc finger protein, putative		193	503	25	2	0	0	0	1
PF3D7_0315600	zinc finger protein, putative		2334	12	85	2	0	0	0	1
PF3D7_0410000	erythrocyte vesicle protein 1		15	920	225	2	1	0	0	0
PF3D7_0622900	AP2 domain transcription factor AP2Tel // AP2 domain transcription factor AP2-SP3, putative	ApiAP2	1820	248	238	2	1	0	0
PF3D7_0624700	N-acetylglucosaminylphosphatidylinositol deacetylase, putative		952	48	62	2	0	0	0	1
PF3D7_0628400	protease, putative		54	131	297	2	0	0	0	1
PF3D7_0630700	bifunctional methylenetetrahydrofolate dehydrogenase/cyclohydrolase, putative		442	152	144	2	0	0	0	1
PF3D7_0702900	centrin, putative		57	3526	3	2	0	1	0	0
PF3D7_0709200	glutaredoxin-like protein // Cg6 protein		118	706	160	2	0	0	0	1
PF3D7_0822200	phosphorylated CTD interacting factor 1 WW domain-containing protein, putative		2633	129	173	2	0	0	0	1
PF3D7_1008300	AP-5 complex subunit sigma-1, putative, pseudogene		2637	57	92	2	0	0	0	1
PF3D7_1010300	succinate dehydrogenase subunit 4, putative		124	1177	88	2	1	0	1	0
PF3D7_1030800	calmodulin, putative		97	18	661	2	0	0	0	1
PF3D7_1030900	ookinete surface protein P28	Pfs28	96	352	26	2	1	1	1	0
PF3D7_1146600	oocyst rupture protein 1, putative // CCAAT-box DNA binding protein subunit B	NFYB	207	1214	117	2	0	0	0	1
PF3D7_1216500	male development gene 1 // protein of early gametocyte 3	Pfmdv-1	68	1837	197	2	0	1	1	0
PF3D7_1302200	early transcribed membrane protein 13	UIS3	5	949	234	2	0	0	0	1
PF3D7_1317200	AP2 domain transcription factor, putative		2428	134	86	2	1	0	0	0
PF3D7_1410400	rhoptry-associated protein 1	RAP-1	13	50	1204	2	1	0	1	0
PF3D7_1453600	RAP protein, putative		226	619	206	2	0	0	0	1
PF3D7_1458900	golgi apparatus membrane protein TVP23, putative		71	3526	249	2	0	0	0	1
PF3D7_0106400	pre-rRNA-processing protein TSR2, putative		581	132	2952	1	1	1	0	0
PF3D7_0109400	tubulin-specific chaperone a, putative		746	116	349	1	0	1	1	0
PF3D7_0111800	eukaryotic translation initiation factor 4E, putative		1198	72	1632	1	0	0	0	1
PF3D7_0207200	iron-sulfur assembly protein, putative		3342	84	2332	1	0	0	0	1
PF3D7_0212000	GDP-fructose:GMP antiporter, putative		1468	123	1996	1	0	1	0	0
PF3D7_0214600	serine/threonine protein kinase, putative		855	217	795	1	0	0	1	0
PF3D7_0215100	RING zinc finger protein, putative		3923	155	3231	1	1	0	1	0
PF3D7_0217700	E2F-associated phosphoprotein, putative		3030	902	34	1	0	0	1	0
PF3D7_0310000	50S ribosomal protein L9, apicoplast, putative		906	49	2105	1	0	1	1	0
PF3D7_0314700	zinc finger protein, putative		2789	160	321	1	0	1	0	0
PF3D7_0315200	circumsporozoite- and TRAP-related protein		235	573	643	1	0	0	1	0
PF3D7_0320400	oocyst capsule protein Cap380, putative		136	411	905	1	0	0	1	0
PF3D7_0322500	iron-sulfur assembly protein, putative		534	60	1768	1	0	0	0	1
PF3D7_0404900	6-cysteine protein	Pf41	134	828	2713	1	1	0	0	0
PF3D7_0407200	peptidyl-tRNA hydrolase 2, putative		2321	87	3093	1	1	1	1	0
PF3D7_0409700	peptide chain release factor 2	RF2Cyt	966	141	525	1	0	1	0	0
PF3D7_0414300	Rab5-interacting protein, putative		126	4212	3312	1	0	0	0	1
PF3D7_0414900	armadillo-domain containing rhoptry protein // armadillo repeats-only protein	PfARO	3627	237	2749	1	1	0	0	0
PF3D7_0422000	steroid dehydrogenase, putative		1794	94	1435	1	0	1	0	0
PF3D7_0501500	rhoptry-associated protein 3		37	1530	475	1	1	0	0	0
PF3D7_0502100	HCNGP-like protein		95	1765	2101	1	0	0	0	1
PF3D7_0502400	merozoite surface protein 8 // ring-stage membrane protein 1	RMP1	28	3160	1548	1	1	0	0	0
PF3D7_0503000	50S ribosomal protein L28, apicoplast, putative		2190	93	3408	1	1	1	1	0
PF3D7_0503100	4-diphosphocytidyl-2-C-methyl-D-erythritol kinase, putative		996	146	300	1	0	0	0	1
PF3D7_0504700	centrosomal protein CEP120, putative		3807	200	2049	1	0	0	0	1
PF3D7_0506600	histone deacetylase, putative, pseudogene		2010	166	510	1	0	0	0	1
PF3D7_0509200	leucine-rich repeat protein	PfLRR2	158	2213	1950	1	0	0	0	1
PF3D7_0510400	PDCD2 domain-containing protein, putative		81	2267	748	1	0	0	0	1
PF3D7_0514800	inositol polyphosphate multikinase, putative		1206	229	1364	1	0	0	0	1
PF3D7_0517800	apicortin, putative // doublecortin domain-containing protein, putative		3015	187	1594	1	0	1	1	0
PF3D7_0518800	secreted ookinete protein, putative		288	81	816	1	0	1	1	0
PF3D7_0522700	iron-sulfur assembly protein, putative		1215	3526	166	1	0	0	0	1
PF3D7_0523500	dynein light chain Tctex-type, putative		245	2384	1741	1	0	1	0	0
PF3D7_0524600	50S ribosomal protein L12, apicoplast, putative		110	952	1722	1	0	1	0	0
PF3D7_0526000	RAP protein, putative		352	612	211	1	0	0	0	1
PF3D7_0528000	proteasome maturation factor UMP1, putative		1225	246	1751	1	0	1	0	0
PF3D7_0610200	RNA-binding protein 25, putative		2936	250	1980	1	0	0	0	1
PF3D7_0611200	AP2 domain transcription factor, putative		2275	45	336	1	0	0	0	1
PF3D7_0612300	transmembrane protein 234, putative		1421	329	179	1	0	0	0	1
PF3D7_0620400	merozoite surface protein 10		7	565	319	1	1	0	0	0
PF3D7_0623000	chorismate synthase	PfCS	11	2214	1841	1	0	0	0	1
PF3D7_0626900	mitochondrial ribosomal protein L46 precursor, putative		1109	256	174	1	0	0	0	1
PF3D7_0627900	ribonuclease P protein subunit p29, putative	RPP29	166	888	723	1	0	0	0	1
PF3D7_0628900	RAP protein, putative		472	176	370	1	0	0	0	1
PF3D7_0705900	ATP synthase subunit C, putative		3896	59	3535	1	1	1	0	0
PF3D7_0707300	rhoptry-associated membrane antigen		1259	215	1344	1	1	0	1	0
PF3D7_0708600	inner membrane complex protein 1d, putative		3072	10	1096	1	0	1	1	0
PF3D7_0718100	exported serine/threonine protein kinase	FEST	1577	506	114	1	0	0	0	1
PF3D7_0721700	secreted ookinete protein, putative		51	2654	1155	1	0	0	1	0
PF3D7_0729000	signal recognition particle subunit SRP9		915	1515	183	1	0	0	0	1
PF3D7_0802100	AP2 domain transcription factor, putative		569	66	506	1	1	0	1	0
PF3D7_0805200	gamete release protein, putative // IMC-associated apicomplexan protein, putative	IAAP	79	3526	981	1	1	1	1	0
PF3D7_0807400	coenzyme Q-binding protein COQ10 homolog, mitochondrial		3067	70	1729	1	0	1	0	0
PF3D7_0812300	sporozoite surface protein 3, putative		123	1191	2246	1	0	0	0	1
PF3D7_0813200	CS domain protein, putative		1753	167	2167	1	1	0	0	0
PF3D7_0813500	PUB domain-containing protein, putative		183	2624	520	1	0	1	1	0
PF3D7_0815000	selenoprotein		152	1546	298	1	0	0	0	1
PF3D7_0816100	phosphopantothenoylcysteine decarboxylase, putative		1654	36	2663	1	1	0	0	0
PF3D7_0816900	adenylate kinase 2		959	199	609	1	0	0	0	1
PF3D7_0817000	NEDD8-activating enzyme E1 catalytic subunit, putative		857	210	833	1	0	0	0	1
PF3D7_0818300	dynactin subunit 6, putative		1309	781	57	1	0	0	0	1
PF3D7_0822100	mediator of RNA polymerase II transcription subunit 7, putative		1318	224	2485	1	0	1	0	0
PF3D7_0823600	lipoate-protein ligase B		638	525	231	1	0	0	0	1
PF3D7_0824700	lipase maturation factor, putative		206	305	1571	1	0	0	0	1
PF3D7_0825300	SAYSvFN domain-containing protein, putative		3098	107	2449	1	0	1	1	0
PF3D7_0905400	high molecular weight rhoptry protein 3		70	2142	636	1	1	0	1	0
PF3D7_0911900	falstatin // inhibitor of cysteine proteases	PfICP	31	300	1006	1	1	1	0	0
PF3D7_0915200	ribonuclease H2 subunit C, putative		185	3136	1637	1	0	0	0	1
PF3D7_0918100	cytochrome b5-like heme/steroid binding protein, putative		458	389	151	1	1	1	0	0
PF3D7_0919500	major facilitator superfamily domain-containing protein, putative		1478	161	3310	1	0	0	0	1
PF3D7_0927200	zinc finger protein, putative		2895	128	1250	1	0	0	1	0
PF3D7_0929400	high molecular weight rhoptry protein 2		232	489	2757	1	1	0	1	0
PF3D7_0930200	leucine-rich repeat protein	PfLRR8	436	157	1336	1	0	0	0	1
PF3D7_0930300	merozoite surface protein 1	Pf195	39	498	640	1	1	1	1	0
PF3D7_0931200	selenoprotein		215	489	916	1	0	1	0	0
PF3D7_0932500	palmitoyltransferase DHHC6, putative		2830	64	931	1	0	0	0	1
PF3D7_1012200	rhoptry associated adhesin		131	3526	2002	1	1	0	0	0
PF3D7_1014100	merozoite surface protein MSA180, putative		201	541	650	1	0	0	0	1
PF3D7_1017100	rhoptry neck protein 12		130	1913	1375	1	1	0	0	0
PF3D7_1023400	HORMA domain protein, putative		241	650	1410	1	0	1	0	0
PF3D7_1024600	RAP protein, putative		1626	201	864	1	0	0	0	1
PF3D7_1028700	merozoite TRAP-like protein		832	1096	49	1	1	0	1	0
PF3D7_1034200	apicoplast ribosomal protein L27 precursor, putative		305	1017	23	1	0	1	0	0
PF3D7_1034600	translation initiation factor IF-3, putative		1844	90	271	1	0	1	0	0
PF3D7_1036700	phosducin-like protein, putative		1791	205	1650	1	0	1	0	0
PF3D7_1106100	apicoplast ribosomal protein S15 precursor, putative		2264	103	1558	1	0	1	0	0
PF3D7_1111500	acylphosphatase, putative		2065	114	2030	1	0	1	0	0
PF3D7_1111900	Josephin domain-containing protein, putative		122	862	285	1	0	0	0	1
PF3D7_1121600	exported protein 1 // circumsporozoite-related antigen // parasitophorous vacuole membrane antigen QF 116	CRA	216	3526	334	1	11	1	0
PF3D7_1121800	peptidase M16, putative		430	1629	209	1	0	0	0	1
PF3D7_1122200	cupin-like protein, putative		1975	95	1470	1	1	0	0	0
PF3D7_1127500	protein disulfide-isomerase, putative		762	92	976	1	1	1	0	0
PF3D7_1130600	methyltransferase, putative		63	639	894	1	0	0	0	1
PF3D7_1132300	nucleic acid binding protein, putative		3835	168	3818	1	0	0	1	0
PF3D7_1132500	amino acid transporter, putative		750	191	463	1	0	0	0	1
PF3D7_1135100	protein phosphatase PPM8, putative		446	112	570	1	1	0	0	0
PF3D7_1143200	DnaJ protein, putative		3200	238	3541	1	1	0	0	0
PF3D7_1144100	mitochondrial large subunit ribosomal protein, putative		3946	63	2519	1	0	1	1	0
PF3D7_1144700	apicoplast import protein Tic20, putative	PfTIC20	2104	80	3015	1	1	1	1	0
PF3D7_1145700	bicoid-interacting protein BIN3, putative		509	234	1625	1	0	0	0	1
PF3D7_1146500	leucine-rich repeat protein	PfLRR10	3510	227	1704	1	0	0	0	1
PF3D7_1146900	protein YIPF6, putative		849	212	2498	1	0	0	0	1
PF3D7_1147100	dynein light chain, putative		90	3526	969	1	0	1	0	0
PF3D7_1147500	protein farnesyltransferase subunit beta		993	695	188	1	0	0	0	1
PF3D7_1201800	cytochrome c oxidase assembly protein COX19, putative		1484	1271	104	1	0	0	0	1
PF3D7_1209600	porphobilinogen deaminase	PfPBGD	2047	232	1356	1	0	0	0	1
PF3D7_1216300	signal recognition particle subunit SRP19		1877	197	1814	1	0	1	0	0
PF3D7_1216600	cell traversal protein for ookinetes and sporozoites		910	1030	16	1	0	0	1	0
PF3D7_1219700	raf kinase inhibitor	PEBP	1023	182	2342	1	0	0	1	0
PF3D7_1220400	debranching enzyme-associated ribonuclease, putative		2390	211	2506	1	0	0	0	1
PF3D7_1225500	small subunit rRNA processing factor, putative		2068	34	1478	1	1	0	0	0
PF3D7_1234200	helicase, putative, pseudogene		777	173	1530	1	0	0	0	1
PF3D7_1240000	3-hydroxyisobutyryl-coenzyme A hydrolase, putative		183	2771	1299	1	0	0	0	1
PF3D7_1241600	mitochondrial carrier protein, putative		616	185	1021	1	0	0	0	1
PF3D7_1252100	rhoptry neck protein 3		218	1566	1896	1	1	0	0	0
PF3D7_1305500	mitogen-activated protein kinase phosphatase 1, putative		1285	897	27	1	0	0	0	1
PF3D7_1306800	RED-like protein, putative		4003	242	826	1	0	0	0	1
PF3D7_1310700	RNA-binding protein, putative		131	578	1186	1	1	1	1	0
PF3D7_1311000	protein ISD11		4145	3526	35	1	0	1	0	0
PF3D7_1313700	Maf-like protein, putative		1476	25	1674	1	0	1	0	0
PF3D7_1314500	cop-coated vesicle membrane protein p24 precursor, putative		658	2952	52	1	0	1	0	0
PF3D7_1317400	zinc finger protein, putative		3620	4212	20	1	0	0	0	1
PF3D7_1320400	type I signal peptidase	PfSPB	114	3190	437	1	0	0	0	1
PF3D7_1321800	protein transport protein SFT2, putative		2637	170	3194	1	1	1	0	0
PF3D7_1327200	ribonuclease P protein subunit RPR2, putative		1157	51	1927	1	0	0	0	1
PF3D7_1328900	PUB domain-containing protein, putative		1563	230	780	1	0	0	0	1
PF3D7_1330700	GPI transamidase subunit PIG-U, putative		634	138	1641	1	0	1	0	0
PF3D7_1331000	protein kinase, putative		1702	67	1253	1	1	0	1	0
PF3D7_1334000	RING zinc finger protein, putative		2900	202	1849	1	0	0	1	0
PF3D7_1341500	inner membrane complex suture component, putative		807	99	850	1	0	0	0	1
PF3D7_1342500	sporozoite protein essential for cell traversal	PfSPECT	1129	32	1329	1	0	0	0	1
PF3D7_1345100	thioredoxin 2		159	440	2677	1	1	1	0	0
PF3D7_1358300	rhomboid protease ROM7		212	2838	1255	1	0	0	0	1
PF3D7_1362100	14-3-3 protein		156	1420	2087	1	0	1	1	0
PF3D7_1362500	exonuclease, putative		683	980	185	1	0	0	0	1
PF3D7_1366800	phosphatidylserine synthase, putative		736	274	210	1	1	0	0	0
PF3D7_1404300	secreted ookinete adhesive protein, putative		634	4212	55	1	1	1	1	0
PF3D7_1411900	p1/s1 nuclease, putative		152	665	262	1	1	0	0	0
PF3D7_1417000	inner membrane complex protein 1l, putative		381	16	879	1	0	0	1	0
PF3D7_1417300	cysteine protease ATG4, putative // autophagy-related protein 4, putative		247	457	1320	1	0	0	0	1
PF3D7_1418100	liver specific protein 1, putative		119	1090	2249	1	0	0	0	1
PF3D7_1418300	calmodulin, putative		255	3526	7	1	0	0	1	0
PF3D7_1421900	copper transporter, putative		2270	2935	168	1	1	1	1	0
PF3D7_1426400	MORN repeat protein, putative		1082	122	3406	1	0	0	0	1
PF3D7_1433600	signal peptidase complex subunit SPC1, putative	SPC12	523	4212	135	1	1	1	1	0
PF3D7_1434000	CCR4-associated factor 16, putative	ABCI2	2241	147	2647	1	1	0	0	0
PF3D7_1438400	metacaspase-like protein		212	1999	407	1	0	0	0	1
PF3D7_1439500	oocyst rupture protein 2, putative	NFYC	1842	803	56	1	0	0	0	1
PF3D7_1442100	replication factor A protein 3, putative		1120	4212	105	1	0	1	0	0
PF3D7_1444300	1-acyl-sn-glycerol-3-phosphate acyltransferase, putative	AGPAT	966	29	309	1	1	1	0	0
PF3D7_1448800	Appr-1-p processing domain protein		1307	2880	163	1	0	0	1	0
PF3D7_1451500	pre-mRNA-splicing factor CWF18, putative		3647	189	3390	1	0	0	0	1
PF3D7_1452200	aminomethyltransferase, putative		1168	108	776	1	0	0	0	1
PF3D7_1454600	mitochondrial ribosomal protein S11 precursor, putative		2984	240	2823	1	0	0	0	1
PF3D7_1455900	polyprenol reductase, putative		141	1343	400	1	0	1	0	0
PF3D7_1459700	pyridoxal 5'-phosphate synthase, putative		1068	120	2124	1	0	0	0	1
PF3D7_1469700	mediator of RNA polymerase II transcription subunit 6, putative		3109	244	1498	1	0	1	0	0
PF3D7_1472900	dihydroorotase, putative		2463	189	1550	1	1	1	1	0
PF3D7_1474700	protein kinase, putative		1149	2488	134	1	0	0	0	1
PF3D7_1475600	bromodomain protein, putative		2507	109	984	1	0	0	0	1
