# Supplementary material for: Complete avian malaria parasite genomes reveal features associated with lineage-specific evolution in birds and mammals
Source: Genome Res. 2018 Apr;28(4):547–60. doi: 10.1101/gr.218123.116 (PMC5880244; doi:10.1101/gr.218123.116)
Supplement: Supplemental Material [file supp_gr.218123.116_Supplemental_Table_S10.xlsx]

## Sheet: dN all
Supplemental Table S10: dN values for all genes with 1:1 orthologous across eight species.
4335 genes with 1:1 orthologues across P. gallinaceum (PGAL8A), P. relictum (PRELSG), P. falciparum (PF3D7), P. reichenowi (PRCDC), P. knowlesi (PKN), P. vivax (PVX), P. berghei (PBANKA) and P. yoelii yoelii (PY17X) are shown along with the annotation for the P. falciparum orthologue. For orthologues in each of the avian (PGAL8A vs PRELSG), falciparum (PF3D7 vs PRCDC) and vivax (PKN vs PVX) clade…
				Annotation													dN values																				ranked order based on dN/dS values											RPKM expression from Lopez Barragán 2011
P. gallinaceum gene	gene length (bp)	alignment length (bp) for dN	ratio kept	Orthologue in P. falciparum	Protein annotation	gene name	PGAL8A vs PRELSG	PGAL8A vs PF3D7	PF3D7 vs PVX	PF3D7 vs PRCDC	PGAL8A vs PVX	PKN vs PVX	PGAL8A vs PRCDC	PGAL8A vs PKN	PGAL8A vs PBANKA	PGAL8A vs PY17X	PRELSG vs PF3D7	PRELSG vs PRCDC	PRELSG vs PKN	PRELSG vs PVX	PRELSG vs PBANKA	PRELSG vs PY17X	PF3D7 vs PKN	PF3D7 vs PBANKA	PF3D7 vs PY17X	PRCDC vs PKN	PRCDC vs PVX	PRCDC vs PBANKA	PRCDC vs PY17X	PKN vs PBANKA	PK vs PY17X	PVX vs PBANKA	PVX vs PY17X	PBANKA vs PY17X	Gene expression P. gallinaceum (FPKM)	Average	PGAL8A vs PRELSG	PGAL8A vs PF3D7	PF3D7 vs PVX	PF3D7 vs PRCDC	PGAL8A vs PVX	PKN vs PVX	PGAL8A vs PRCDC	PGAL8A vs PKN	Ring	Early Trophozoite	Late Trophozoite	Schizont	Gametocyte II
PGAL8A_00001500	1113	582	52.29	PF3D7_0301900	conserved Plasmodium protein, unknown function		0.0722	0.1472	0.1672	0.0039	0.1224	0.0263	0.148	0.128	0.1737	0.1645	0.1359	0.1417	0.1432	0.1297	0.1571	0.1452	0.1777	0.2022	0.1943	0.1799	0.1693	0.2098	0.2016	0.214	0.1954	0.1831	0.1788	0.0095	5.958	0.05002	1189	2210	2711	2676	3131	3291	2198	3001	14.06	32.09	22.73	20.24	54.32
PGAL8A_00001600	1788	1392	77.85	PF3D7_0302000	pre-mRNA-splicing factor PRP46, putative		0.0274	0.0486	0.0425	0.0026	0.0511	0.0114	0.0478	0.0521	0.0607	0.0589	0.0549	0.0529	0.0485	0.0499	0.0633	0.0595	0.0475	0.0644	0.0624	0.0453	0.0402	0.0622	0.0602	0.0583	0.0544	0.061	0.0572	0.006	41.968	0.02046	3159	3854	4022	3074	3935	3912	3859	3927	84.27	83.28	71.91	56.47	65.69
PGAL8A_00001700	4062	1974	48.6	PF3D7_0302100	serine/threonine protein kinase	CLK4	0.0683	0.1491	0.1969	0.0079	0.1731	0.0319	0.1502	0.1777	0.1777	0.1779	0.1523	0.1525	0.1787	0.1776	0.1694	0.1712	0.201	0.1771	0.1758	0.2024	0.1973	0.1763	0.1751	0.179	0.1791	0.179	0.1796	0.0115	167.27	0.06748	1300	2187	2379	1621	2493	3024	2161	2335	74.73	84.7	75.9	56.45	46.89
PGAL8A_00001900	3819	2028	53.1	PF3D7_0302600	ABC transporter B family member 4, putative	MDR4	0.0555	0.1832	0.2396	0.011	0.2397	0.063	0.1828	0.2233	0.2515	0.2452	0.1838	0.1859	0.2391	0.2571	0.2445	0.2383	0.2359	0.2532	0.2473	0.2318	0.2378	0.2518	0.2462	0.257	0.2496	0.2801	0.2733	0.0198	10.299	0.0857	1853	1643	1960	1046	1739	1639	1639	1779	10.82	45.23	46.81	44.24	17.54
PGAL8A_00002000	456	300	65.79	PF3D7_0302700	CDGSH iron-sulfur domain-containing protein, putative	PfMNL1	0.04	0.0909	0.1591	0	0.1337	0.0274	0.0909	0.1382	0.1825	0.1809	0.1341	0.134	0.1581	0.1685	0.1979	0.1965	0.1557	0.1724	0.1717	0.1559	0.1595	0.1725	0.1719	0.197	0.2137	0.2173	0.236	0.0097	29.378	0.04784	2541	3180	2805	3943	2971	3239	3182	2855	36.78	49.75	62.58	70.31	78.47
PGAL8A_00002100	1332	711	53.38	PF3D7_0302800	conserved Plasmodium protein, unknown function		0.0314	0.1321	0.1555	0.0032	0.1162	0.0325	0.1291	0.1294	0.1238	0.1279	0.1254	0.122	0.1233	0.106	0.1221	0.1288	0.1755	0.1593	0.1568	0.1711	0.1515	0.156	0.154	0.1374	0.1438	0.1207	0.127	0.0069	71.992	0.02954	2971	2455	2854	2874	3205	2995	2506	2980	73.45	56.78	36.61	31.76	29.95
PGAL8A_00002200	3687	3288	89.18	PF3D7_0302900	exportin-1, putative		0.005	0.0128	0.0161	0.0004	0.0162	0.0032	0.0125	0.0135	0.033	0.0367	0.01	0.0098	0.0119	0.0136	0.0319	0.0364	0.0143	0.0323	0.0357	0.0137	0.0158	0.0312	0.0358	0.0319	0.0357	0.0341	0.0371	0.0062	126.954	0.00364	4127	4216	4215	3566	4217	4180	4217	4233	83.97	72.44	84.42	81.81	69.34
PGAL8A_00002300	2307	1866	80.88	PF3D7_0303000	N-ethylmaleimide-sensitive fusion protein		0.0261	0.0641	0.0819	0.0019	0.0793	0.0286	0.0649	0.0747	0.0891	0.0864	0.0729	0.0736	0.0777	0.0832	0.0922	0.0902	0.0786	0.0873	0.0854	0.0779	0.0826	0.0882	0.0862	0.0959	0.0949	0.0962	0.0929	0.0145	40.205	0.02044	3231	3639	3698	3277	3658	3178	3622	3696	47.41	39.12	41.79	36.78	34.46
PGAL8A_00002400	3669	1557	42.44	PF3D7_0303100	conserved Plasmodium protein, unknown function		0.0906	0.2442	0.4169	0.006	0.4137	0.0866	0.2486	0.3861	0.3369	0.3575	0.2463	0.2471	0.4105	0.4475	0.3215	0.3486	0.3738	0.2971	0.3102	0.3707	0.4137	0.2973	0.3142	0.4351	0.4429	0.4637	0.4838	0.0572	23.409	0.08112	702	946	728	2051	545	967	905	561	16.13	42.01	31.73	40.57	12.82
PGAL8A_00002500	2736	1530	55.92	PF3D7_0303200	HAD superfamily protein, putative		0.0168	0.0433	0.0581	0.0008	0.0527	0.0079	0.0425	0.0541	0.0686	0.0689	0.0442	0.0433	0.0603	0.0588	0.0692	0.0699	0.0588	0.0756	0.0744	0.058	0.0571	0.0748	0.0736	0.0693	0.0673	0.0688	0.0664	0.0173	78.475	0.01392	3665	3918	3892	3535	3915	4036	3921	3902	48.36	60.65	86.71	86.57	61.76
PGAL8A_00002600	456	348	76.32	PF3D7_0303300	DNA-directed RNA polymerases I, II, and III subunit RPABC2, putative		0.0033	0.0526	0.066	0.0001	0.0589	0.0114	0.0523	0.0598	0.0438	0.0443	0.0551	0.0549	0.0637	0.0626	0.0468	0.0472	0.062	0.0543	0.0547	0.0621	0.066	0.0544	0.0546	0.0506	0.0508	0.0594	0.0595	0.0006	46.992	0.00624	4175	3797	3817	3612	3856	3912	3801	3849	82.05	78.78	72.55	49.49	83.49
PGAL8A_00002700	1830	1596	87.21	PF3D7_0303400	palmitoyltransferase DHHC1	AnkDHHC	0.0273	0.0902	0.1774	0.0039	0.1771	0.0723	0.0927	0.1412	0.1289	0.1225	0.0745	0.0766	0.1314	0.1708	0.1186	0.115	0.1462	0.1347	0.1275	0.1443	0.1753	0.1367	0.1304	0.1689	0.1619	0.2105	0.2026	0.0137	33.117	0.06072	3169	3187	2599	2676	2425	1347	3150	2821	30.95	15.44	71.44	80.09	73.74
PGAL8A_00002800	5364	2544	47.43	PF3D7_0303500	spindle pole body protein, putative		0.035	0.1126	0.1881	0.0032	0.1883	0.0537	0.1119	0.176	0.1503	0.1531	0.1132	0.113	0.1743	0.1896	0.1503	0.1547	0.177	0.1718	0.1761	0.1767	0.1874	0.1701	0.1743	0.2315	0.2382	0.2425	0.2508	0.0165	58.053	0.03044	2803	2793	2470	2874	2298	2008	2806	2360	24.79	37.22	50.8	54.37	54.46
PGAL8A_00002900	531	360	67.8	PF3D7_0303600	plasmoredoxin		0.0305	0.1341	0.2252	0.0001	0.2151	0.0658	0.1342	0.1786	0.1647	0.1627	0.1418	0.1413	0.1887	0.2257	0.1536	0.1507	0.2234	0.1567	0.149	0.2251	0.2256	0.1568	0.1497	0.2027	0.1911	0.2085	0.1988	0.0174	14.518	0.03806	3025	2429	2101	3612	1991	1550	2427	2324	7.97	49.87	25	46.95	65.12
PGAL8A_00003000	1416	855	60.38	PF3D7_0303700	lipoamide acyltransferase component of branched-chain alpha-keto acid dehydrogenase complex	BCDH-E2	0.0626	0.1379	0.2126	0.0087	0.1439	0.0601	0.1324	0.1307	0.1481	0.144	0.142	0.1385	0.1561	0.1706	0.1614	0.1552	0.1926	0.1781	0.1704	0.1796	0.2024	0.1789	0.1711	0.1766	0.1724	0.207	0.2069	0.016	151.168	0.07714	1536	2382	2221	1461	2832	1759	2461	2960	47.5	81.84	86.1	86.29	75.07
PGAL8A_00003100	1689	1098	65.01	PF3D7_0303800	IBR domain protein, putative		0.0432	0.1787	0.3278	0.0106	0.2793	0.0705	0.1761	0.2525	0.2561	0.2684	0.1878	0.1853	0.2486	0.2808	0.2652	0.2818	0.2882	0.2947	0.3008	0.2833	0.3221	0.2911	0.297	0.3095	0.3293	0.342	0.3607	0.0436	15.053	0.0759	2405	1712	1210	1103	1335	1399	1750	1472	27.38	62.25	44.68	42.39	34
PGAL8A_00003200	582	453	77.84	PF3D7_0303900	phosphatidylethanolamine-binding protein, putative		0.0741	0.2668	0.3357	0.0053	0.3467	0.0687	0.2681	0.3378	0.2678	0.2668	0.2493	0.2518	0.3153	0.3357	0.2883	0.2869	0.3488	0.3218	0.3376	0.3477	0.3312	0.3181	0.3342	0.4047	0.398	0.3786	0.3857	0.0568	4.758	0.0875	1132	768	1162	2261	870	1455	763	798	30	3.74	34.59	32.8	93.44
PGAL8A_00003300	2433	1131	46.49	PF3D7_0304000	inner membrane complex protein 1a, putative	PfIMC1a	0.105	0.2002	0.2177	0.0062	0.2209	0.0507	0.2012	0.214	0.2725	0.2651	0.1914	0.1923	0.2051	0.2225	0.2787	0.2763	0.2027	0.2597	0.2534	0.2047	0.2204	0.2633	0.2568	0.2207	0.2248	0.2376	0.2378	0.0467	1.09	0.05668	461	1408	2174	2001	1929	2128	1399	1890	24.42	16.08	17.5	23.6	14.66
PGAL8A_00003400	1452	810	55.79	PF3D7_0304100	inner membrane complex protein 1e, putative	ALV2	0.0234	0.0976	0.1292	0.0101	0.1178	0.0273	0.0923	0.1078	0.1223	0.1161	0.1028	0.0952	0.1078	0.1156	0.1184	0.1087	0.1263	0.1534	0.1385	0.1329	0.1354	0.1454	0.1326	0.1155	0.1168	0.137	0.1386	0.0089	77.175	0.03826	3341	3065	3133	1178	3185	3241	3155	3275	12.86	4.79	56.17	76.08	70.97
PGAL8A_00003500	1578	1518	96.2	PF3D7_0304200	EH domain-containing protein	PfPast-1	0.017	0.0533	0.0414	0	0.0635	0.012	0.0533	0.0613	0.0714	0.0691	0.059	0.0589	0.0619	0.0686	0.0739	0.0725	0.0409	0.0423	0.041	0.0409	0.0414	0.0423	0.041	0.0408	0.0412	0.0371	0.0377	0.0032	43.285	0.01286	3653	3787	4027	3943	3807	3893	3789	3827	80.28	77.62	68.03	75.06	66.3
PGAL8A_00003600	3528	1422	40.31	PF3D7_0304300	conserved Plasmodium protein, unknown function		0.1577	0.459	0.9927	0.0198	0.8983	0.144	0.4603	0.8195	0.477	0.4819	0.4552	0.4433	0.8128	0.8626	0.4538	0.4644	0.9211	0.6026	0.6302	0.944	0.9998	0.5896	0.591	0.9097	0.8433	0.9693	0.8761	0.0449	14.596	0.30268	115	143	31	307	31	202	138	31	26.9	15.84	19.65	26.73	15.35
PGAL8A_00003800	507	411	81.07	PF3D7_0304500	1-cys-glutaredoxin-like protein-1	PfGLP1	0.0573	0.202	0.168	0.0029	0.2663	0.0501	0.206	0.2538	0.2711	0.2547	0.1793	0.1822	0.2302	0.2357	0.2597	0.2429	0.1964	0.2343	0.2119	0.1995	0.1673	0.2286	0.2063	0.249	0.2472	0.2792	0.2789	0.0201	13.39	0.06432	1761	1390	2696	2972	1451	2155	1333	1455	39	57.34	52.09	42.12	72.44
PGAL8A_00003900	1518	279	18.38	PF3D7_0304600	circumsporozoite (CS) protein	PfCSP	0.1598	0.5476	0.7014	0.0439	0.745	0.1351	0.5666	0.6759	0.5506	0.5588	0.55	0.5768	0.7167	0.7583	0.5171	0.596	0.7625	0.5935	0.5576	0.8162	0.7732	0.6092	0.5614	0.6274	0.6863	0.6426	0.6644	0.0717	0.705	0.23022	113	66	135	15	72	279	61	82	70.07	76.98	79.23	86.81	93.16
PGAL8A_00004100	3741	1119	29.91	PF3D7_0304800	conserved Plasmodium membrane protein, unknown function		0.1312	0.3321	0.6707	0.0211	0.637	0.1568	0.3234	0.6348	0.4351	0.4329	0.3254	0.3175	0.6129	0.6683	0.4775	0.4788	0.6612	0.477	0.4697	0.6517	0.6462	0.4614	0.4607	0.7799	0.7325	0.7744	0.7622	0.0303	2.406	0.23368	214	418	167	252	142	145	459	104	12.07	12.31	24.01	30.83	27
PGAL8A_00004200	513	240	46.78	PF3D7_0304900	conserved Plasmodium protein, unknown function		0.0327	0.1019	0.1797	0.0049	0.2025	0.0383	0.0981	0.1917	0.1464	0.1384	0.1272	0.1212	0.1815	0.1816	0.1605	0.1533	0.2086	0.1328	0.1213	0.2128	0.1816	0.1387	0.1262	0.2389	0.2261	0.2242	0.2133	0.0119	7.253	0.02432	2911	2980	2573	2382	2130	2686	3061	2150	78.15	83.87	56.21	42.26	68.34
PGAL8A_00004300	1071	693	64.71	PF3D7_0305000	elongation factor Ts		0.0691	0.1639	0.2733	0.0017	0.2756	0.0819	0.1663	0.2774	0.1694	0.166	0.1589	0.1613	0.2656	0.291	0.1718	0.1686	0.2421	0.1708	0.1678	0.2381	0.2691	0.1678	0.1649	0.2436	0.24	0.2672	0.2684	0.0109	39.509	0.04088	1281	1936	1636	3337	1375	1070	1905	1220	57.85	60.15	67.37	56.9	46.58
PGAL8A_00004400	11292	3054	27.05	PF3D7_0305100	conserved Plasmodium protein, unknown function		0.0866	0.3196	0.6574	0.0176	0.5565	0.1458	0.32	0.4897	0.3285	0.3434	0.3287	0.324	0.5255	0.5967	0.3232	0.335	0.6045	0.3851	0.4079	0.5898	0.6339	0.3762	0.3971	0.5477	0.5586	0.6119	0.624	0.0382	47.102	0.10886	799	469	183	404	229	193	467	268	36.14	64.51	48.87	53.21	48.28
PGAL8A_00004500	5340	933	17.47	PF3D7_0305200	conserved Plasmodium protein, unknown function		0.0863	0.3226	0.6581	0.0088	0.5959	0.1831	0.3281	0.5413	0.3474	0.3223	0.3312	0.3339	0.5217	0.5757	0.3524	0.3213	0.53	0.3935	0.4021	0.5172	0.6397	0.3791	0.3872	0.533	0.5483	0.5978	0.6102	0.0392	90.47	0.10868	804	453	182	1438	184	70	437	201	68.08	70.3	51.13	74.95	34.53
PGAL8A_00004600	1815	711	39.17	PF3D7_0305300	conserved Plasmodium membrane protein, unknown function		0.0537	0.1186	0.1545	0.0017	0.1741	0.055	0.1197	0.1723	0.2574	0.2764	0.1204	0.1216	0.1757	0.1829	0.2387	0.2661	0.146	0.2456	0.2835	0.1476	0.157	0.2466	0.2845	0.283	0.3066	0.2803	0.3036	0.0612	15.915	0.02824	1929	2697	2865	3337	2474	1957	2670	2413	89.3	79.18	65.54	62.66	61.66
PGAL8A_00004700	366	237	64.75	PF3D7_0305400	conserved Plasmodium protein, unknown function		0.0101	0.0685	0.0837	0	0.0811	0.0267	0.0686	0.0706	0.0672	0.0616	0.0568	0.0568	0.0585	0.0684	0.0565	0.0508	0.0696	0.0548	0.048	0.0696	0.0837	0.0548	0.048	0.0671	0.0592	0.0562	0.0475	0.0053	97.127	0.01788	3947	3565	3678	3943	3637	3271	3567	3743	74.31	60.02	75.49	73.03	93.82
PGAL8A_00004800	9075	4032	44.43	PF3D7_0305500	conserved Plasmodium protein, unknown function		0.0587	0.1127	0.1705	0.0038	0.193	0.0611	0.1117	0.1855	0.1941	0.2045	0.1328	0.1312	0.203	0.2069	0.2046	0.2115	0.1715	0.2078	0.2118	0.1722	0.172	0.2076	0.2117	0.2645	0.2656	0.2724	0.2785	0.0484	22.562	0.02436	1701	2789	2665	2709	2237	1711	2811	2231	82.07	91.1	73.95	85.56	57.21
PGAL8A_00004900	1581	906	57.31	PF3D7_0305600	AP endonuclease (DNA-[apurinic or apyrimidinic site] lyase), putative		0.0399	0.1598	0.2421	0.009	0.2251	0.0765	0.1579	0.1978	0.1904	0.1901	0.1508	0.1455	0.2013	0.2336	0.1659	0.1625	0.2113	0.2029	0.2101	0.216	0.2445	0.2093	0.2145	0.268	0.2603	0.2649	0.269	0.044	58.026	0.03772	2546	2001	1933	1400	1887	1216	2045	2072	41.98	32.92	76.44	78.31	32.75
PGAL8A_00005000	429	417	97.2	PF3D7_0305700	ubiquitin-conjugating enzyme E2, putative		0.0118	0.0206	0.0338	0	0.0371	0.0128	0.0206	0.0316	0.0629	0.0587	0.0142	0.0142	0.0325	0.0358	0.0557	0.0585	0.0347	0.0671	0.0627	0.0347	0.0338	0.0671	0.0627	0.0684	0.0719	0.0722	0.0684	0.0219	230.823	0.00602	3884	4154	4084	3943	4066	3852	4151	4106	87.21	94.25	95.88	95.27	95.66
PGAL8A_00005100	3123	1572	50.34	PF3D7_0305800	P-loop containing nucleoside triphosphate hydrolase, putative		0.0594	0.1273	0.2076	0.003	0.1991	0.0773	0.1286	0.1869	0.1562	0.1628	0.1274	0.1288	0.1614	0.1794	0.1545	0.1673	0.1941	0.167	0.1769	0.1935	0.2057	0.1662	0.1754	0.2097	0.2125	0.2276	0.2352	0.0353	11.383	0.04206	1679	2538	2281	2943	2168	1194	2519	2210	28.77	13.05	11.51	11.91	38.58
PGAL8A_00005300	411	345	83.94	PF3D7_0306000	conserved Plasmodium protein, unknown function		0.0245	0.0963	0.1171	0.0001	0.1457	0.0416	0.0968	0.1238	0.1174	0.1165	0.1156	0.116	0.1091	0.1319	0.1081	0.1068	0.1045	0.1092	0.106	0.1055	0.1177	0.109	0.1058	0.0706	0.0736	0.0908	0.0877	0.0037	19.331	0.03462	3297	3089	3285	3612	2810	2525	3077	3056	48.66	32.62	79.76	83	93.08
PGAL8A_00005400	3453	378	10.95	PF3D7_0306100	conserved Plasmodium protein, unknown function		0.0733	0.2013	0.3422	0.0059	0.2644	0.0846	0.1979	0.2183	0.2911	0.3342	0.2292	0.2185	0.2277	0.2704	0.2903	0.3241	0.2745	0.3548	0.3864	0.2733	0.3289	0.3533	0.3844	0.277	0.3252	0.285	0.3211	0.0493	92.302	0.03188	1156	1393	1119	2068	1472	1003	1438	1838	70.97	66.18	56.88	47.48	34.05
PGAL8A_00005500	1041	783	75.22	PF3D7_0306200	activator of Hsp90 ATPase		0.0783	0.1632	0.2644	0.0044	0.2392	0.0518	0.1635	0.2152	0.1848	0.1897	0.1683	0.1664	0.2299	0.238	0.2169	0.2126	0.2394	0.2626	0.2586	0.2336	0.2581	0.2571	0.2533	0.2868	0.2868	0.317	0.3162	0.0117	79.148	0.07616	1000	1947	1731	2528	1747	2080	1949	1880	66.76	64.48	52.4	30.39	75.9
PGAL8A_00005600	330	273	82.73	PF3D7_0306300	glutaredoxin 1		0.0666	0.1377	0.1059	0.0046	0.1315	0.0349	0.1323	0.1477	0.15	0.1773	0.1329	0.1271	0.1381	0.1394	0.1879	0.1932	0.0999	0.1494	0.1626	0.0946	0.1007	0.1435	0.1567	0.0898	0.1151	0.0675	0.0978	0.0457	146.316	0.11238	1380	2385	3429	2465	3006	2866	2462	2718	90.72	94.2	95.27	88.61	97.99
PGAL8A_00005700	1860	1626	87.42	PF3D7_0306400	FAD-dependent glycerol-3-phosphate dehydrogenase, putative		0.0312	0.1024	0.1777	0.0043	0.1604	0.0537	0.1011	0.1471	0.1025	0.1043	0.0984	0.0988	0.1408	0.1637	0.1053	0.1064	0.1538	0.1153	0.1129	0.1564	0.1834	0.1167	0.1143	0.1353	0.132	0.1581	0.155	0.0137	69.03	0.01908	2989	2968	2591	2565	2645	2008	2996	2725	26.22	32.16	81.67	89.87	20.37
PGAL8A_00005800	843	627	74.38	PF3D7_0306500	conserved Plasmodium protein, unknown function		0.0314	0.0572	0.0935	0.0018	0.0793	0.0232	0.0575	0.0788	0.0742	0.0734	0.061	0.059	0.0805	0.084	0.0774	0.0764	0.0793	0.0738	0.0746	0.0811	0.0957	0.0758	0.0766	0.0891	0.0857	0.0893	0.0864	0.0112	126.685	0.01948	2971	3743	3571	3312	3658	3424	3742	3646	36.51	31.53	83.31	85.32	78.99
PGAL8A_00005900	258	213	82.56	PF3D7_0306600	conserved Plasmodium protein, unknown function		0.0433	0.0738	0.1133	0.0061	0.0874	0.0275	0.0747	0.0867	0.0952	0.0852	0.0965	0.0964	0.1154	0.1151	0.1353	0.123	0.0939	0.1271	0.1298	0.0996	0.1125	0.1333	0.136	0.1379	0.1252	0.1421	0.1296	0.0072	14.788	0.03492	2397	3469	3336	2025	3558	3232	3464	3535	4.55	32.02	81.24	92.47	91.66
PGAL8A_00006000	351	309	88.03	PF3D7_0306700	membrane magnesium transporter, putative		0.0593	0.3092	0.395	0.0043	0.3535	0.0611	0.3185	0.2636	0.2982	0.3007	0.2965	0.3055	0.2603	0.3627	0.3073	0.3104	0.3462	0.4437	0.423	0.3541	0.4032	0.4383	0.4176	0.3475	0.3402	0.4078	0.4034	0.0211	35.186	0.07974	1686	517	829	2565	825	1711	480	1353	84.97	82.64	80.57	61.35	89.91
PGAL8A_00006100	1599	1488	93.06	PF3D7_0306800	T-complex protein 1 subunit beta	TCP1-b	0.0063	0.0339	0.0488	0.0024	0.0382	0.0129	0.0332	0.0402	0.0424	0.0388	0.0314	0.0307	0.0376	0.0355	0.0392	0.0364	0.0413	0.0462	0.0442	0.0422	0.048	0.0472	0.0451	0.0464	0.0413	0.0493	0.0445	0.0085	263.155	0.00548	4088	4023	3971	3128	4061	3850	4028	4032	93.27	93.54	90.67	69.05	60.5
PGAL8A_00006200	438	384	87.67	PF3D7_0306900	40S ribosomal protein S23, putative		0.0011	0.0046	0.0036	0.0001	0.0065	0.0005	0.0037	0.0077	0.0031	0.0031	0.0019	0.0019	0.0073	0.0071	0.0032	0.0031	0.0034	0.0037	0.0044	0.0034	0.0052	0.0035	0.0043	0.0052	0.0048	0.0049	0.005	0.0001	322.686	0.001	4239	4267	4277	3612	4267	4230	4269	4260	99.13	99.27	98.74	98.41	98.63
PGAL8A_00006400	426	360	84.51	PF3D7_0307100	40S ribosomal protein S12, putative		0.0067	0.0648	0.0883	0	0.0773	0.0073	0.0648	0.0829	0.0827	0.0893	0.0648	0.0648	0.0923	0.0858	0.0826	0.089	0.0853	0.0754	0.0663	0.0853	0.0883	0.0754	0.0663	0.0821	0.0895	0.0772	0.0853	0.0066	542.306	0.00674	4073	3627	3629	3943	3682	4052	3624	3587	97.01	97.89	96.97	91.95	96.45
PGAL8A_00006500	774	477	61.63	PF3D7_0307200	60S ribosomal protein L7, putative		0.0132	0.0471	0.0753	0.0027	0.0708	0.0166	0.0447	0.065	0.0539	0.0594	0.0447	0.0422	0.069	0.0752	0.0526	0.0573	0.0656	0.0438	0.0495	0.0624	0.0718	0.0411	0.0468	0.0711	0.0768	0.084	0.0897	0.005	690.846	0.04068	3828	3868	3748	3043	3746	3697	3895	3788	98.11	97.72	96.59	95.74	95.93
PGAL8A_00006600	1254	729	58.13	PF3D7_0307300	microtubule-associated protein RP/EB family, putative		0.0517	0.1047	0.1585	0.0016	0.1377	0.0231	0.1068	0.1466	0.1591	0.1513	0.1245	0.1264	0.1534	0.1415	0.1588	0.1458	0.1661	0.1641	0.1585	0.1682	0.1605	0.1665	0.1609	0.1605	0.1606	0.1666	0.1668	0.0356	28.467	0.02436	2013	2921	2812	3361	2919	3431	2889	2736	18.38	16.88	10.96	29.17	24.68
PGAL8A_00006800	1011	525	51.93	PF3D7_0307400	ATP-dependent Clp protease proteolytic subunit	PfClpP	0.0398	0.063	0.1177	0.0066	0.113	0.046	0.0679	0.101	0.0805	0.0745	0.0661	0.0713	0.1113	0.1303	0.0845	0.0783	0.1081	0.0754	0.0647	0.1106	0.1205	0.0805	0.067	0.148	0.1366	0.1603	0.1542	0.0331	18.394	0.04136	2549	3658	3279	1906	3245	2333	3583	3353	35.19	47.15	67.01	68.53	47.5
PGAL8A_00006900	918	639	69.61	PF3D7_0307500	conserved protein, unknown function		0.0543	0.243	0.2679	0.0216	0.2116	0.0453	0.2407	0.2072	0.1754	0.1771	0.2426	0.2332	0.2022	0.1988	0.1464	0.1539	0.2511	0.2553	0.2511	0.2499	0.2628	0.2522	0.2484	0.1683	0.1716	0.1681	0.1706	0.0188	108.297	0.09176	1903	955	1687	223	2036	2367	977	1970	6.91	39.54	62.99	69.55	53.45
PGAL8A_00007000	1704	615	36.09	PF3D7_0307600	conserved Plasmodium protein, unknown function		0.0965	0.4046	0.6114	0.0145	0.5599	0.1368	0.4118	0.4751	0.4346	0.4316	0.432	0.4369	0.5009	0.5396	0.447	0.4332	0.5909	0.4588	0.4504	0.5926	0.6134	0.4594	0.4609	0.6522	0.656	0.625	0.6125	0.0397	17.544	0.10844	579	219	238	650	222	262	210	304	20.72	41.72	71.99	75.87	55.51
PGAL8A_00007100	4701	1164	24.76	PF3D7_0307700	conserved Plasmodium protein, unknown function		0.0393	0.1724	0.3554	0.0062	0.3055	0.1154	0.1736	0.2978	0.2056	0.2162	0.1834	0.1838	0.3083	0.3287	0.2145	0.2257	0.3444	0.2366	0.2426	0.3474	0.3559	0.2356	0.242	0.3571	0.3295	0.3708	0.3287	0.0473	134.074	0.07666	2573	1806	1051	2001	1140	488	1800	1061	51.5	84.87	94.93	97.09	67.79
PGAL8A_00007200	1938	1014	52.32	PF3D7_0307800	conserved Plasmodium protein, unknown function		0.0658	0.1093	0.1906	0.0034	0.1936	0.0494	0.112	0.1879	0.1306	0.1236	0.1094	0.1109	0.1766	0.1899	0.1302	0.1251	0.1692	0.1171	0.1162	0.1707	0.1893	0.1173	0.1165	0.1791	0.1768	0.191	0.185	0.0141	58.292	0.04566	1411	2838	2444	2816	2224	2181	2802	2193	67.2	67.75	72.81	64.88	57.82
PGAL8A_00007300	11478	3921	34.16	PF3D7_0307900	conserved Plasmodium protein, unknown function		0.0891	0.3074	0.4386	0.0212	0.3903	0.1134	0.305	0.3717	0.299	0.2922	0.3078	0.3064	0.3805	0.4018	0.289	0.2799	0.4289	0.3547	0.3535	0.4273	0.4392	0.3606	0.3605	0.4198	0.4206	0.4492	0.4427	0.0292	7.938	0.10542	738	524	637	247	654	520	538	624	27.57	38.43	15.96	14.23	20.13
PGAL8A_00007400	1350	1110	82.22	PF3D7_0308000	DNA polymerase delta small subunit, putative		0.0351	0.1023	0.2046	0.0032	0.1836	0.0563	0.1021	0.1858	0.1243	0.1172	0.1159	0.1145	0.186	0.1792	0.1153	0.1085	0.2062	0.139	0.1345	0.2062	0.2056	0.1349	0.1306	0.2051	0.1975	0.1973	0.1897	0.0098	91.152	0.03464	2797	2972	2309	2874	2358	1901	2976	2225	27.32	63.93	66.44	51.22	66.85
PGAL8A_00007500	5586	2145	38.4	PF3D7_0308100	zinc finger protein, putative		0.0892	0.2359	0.4401	0.0136	0.4267	0.1745	0.247	0.3736	0.2555	0.252	0.2569	0.2663	0.3792	0.4093	0.2691	0.2681	0.3901	0.3023	0.3008	0.3954	0.4388	0.31	0.3088	0.3792	0.372	0.4233	0.4206	0.0207	132.41	0.08472	734	1025	632	736	501	90	916	610	28.04	8.15	52.66	77.86	18.52
PGAL8A_00007600	1620	1485	91.67	PF3D7_0308200	T-complex protein 1 subunit eta	TRiCeta	0.0024	0.0295	0.0493	0.0024	0.0438	0.0157	0.0295	0.0365	0.033	0.0303	0.0289	0.0281	0.034	0.041	0.0326	0.0297	0.0474	0.0439	0.0392	0.0465	0.0486	0.0438	0.0407	0.0481	0.0448	0.0543	0.0509	0.0077	195.938	0.00692	4203	4064	3967	3128	3997	3747	4064	4066	93.66	93.58	90.98	85.58	74.54
PGAL8A_00007900	423	363	85.82	PF3D7_0308500	activator of Hsp90 ATPase, putative		0.0348	0.1202	0.1462	0.0001	0.1699	0.0337	0.1185	0.1721	0.0764	0.089	0.1035	0.1029	0.1552	0.1318	0.0796	0.0936	0.1536	0.1116	0.1169	0.1534	0.1467	0.1111	0.1161	0.1682	0.1825	0.1587	0.1723	0.021	68.269	0.0376	2812	2667	2954	3612	2535	2923	2701	2417	75.42	94.13	89.61	80.51	96.95
PGAL8A_00008000	1497	1362	90.98	PF3D7_0308600	pre-mRNA-processing factor 19, putative	PRP19	0.0172	0.0934	0.1637	0.0035	0.1519	0.0707	0.0953	0.1341	0.0806	0.0857	0.0857	0.0876	0.1313	0.1475	0.082	0.0847	0.141	0.1063	0.1061	0.1426	0.1623	0.1106	0.1104	0.1388	0.146	0.1612	0.1671	0.0115	54.986	0.02602	3646	3142	2749	2791	2752	1390	3097	2911	87.14	86.48	85.58	70.97	44.37
PGAL8A_00008100	1302	846	64.98	PF3D7_0308700	conserved Plasmodium protein, unknown function		0.0809	0.2694	0.3875	0.0059	0.4245	0.0888	0.2717	0.3729	0.3201	0.3081	0.2805	0.2791	0.3626	0.4052	0.3221	0.3092	0.3724	0.3036	0.3075	0.3822	0.3974	0.2994	0.3032	0.3659	0.3613	0.3683	0.3552	0.032	34.678	0.0674	935	748	869	2068	511	916	737	613	38.26	19.56	54.2	87.69	44.52
PGAL8A_00008200	327	318	97.25	PF3D7_0308800	conserved protein, unknown function		0.0399	0.071	0.2447	0.0072	0.228	0.0969	0.0667	0.1652	0.0708	0.0735	0.0628	0.0593	0.1715	0.2345	0.0951	0.0984	0.1641	0.1022	0.1038	0.1548	0.2356	0.1085	0.11	0.1864	0.1884	0.2289	0.2328	0.0122	18.163	0.09666	2546	3522	1904	1776	1854	750	3602	2509	57.43	36.37	78.8	87.97	89.37
PGAL8A_00008300	3846	2910	75.66	PF3D7_0308900	splicing factor 3B subunit 1, putative		0.0067	0.0586	0.0871	0.0083	0.0679	0.0213	0.0604	0.0652	0.0522	0.0597	0.0585	0.0599	0.0648	0.0676	0.0501	0.0585	0.0853	0.073	0.0768	0.0865	0.0887	0.0747	0.0785	0.0847	0.0897	0.0857	0.0925	0.0172	57.642	0.01672	4073	3724	3645	1544	3774	3503	3696	3787	84.58	85.01	74.64	73.41	37.98
PGAL8A_00008400	1566	984	62.84	PF3D7_0309000	dual specificity protein phosphatase	PfYVH1	0.0662	0.1435	0.229	0.0132	0.2104	0.0629	0.1432	0.2003	0.2143	0.2057	0.1467	0.1476	0.206	0.2273	0.209	0.2044	0.2227	0.2231	0.216	0.2262	0.235	0.2199	0.215	0.2571	0.2495	0.2626	0.251	0.0294	26.764	0.04954	1395	2281	2061	772	2051	1648	2287	2048	81.56	65.35	57.59	54.96	61
PGAL8A_00008500	531	327	61.58	PF3D7_0309100	conserved Plasmodium protein, unknown function		0.0236	0.1029	0.1832	0	0.2079	0.0576	0.1045	0.1886	0.1671	0.1822	0.1131	0.1139	0.1859	0.2007	0.1724	0.1763	0.1773	0.2133	0.2198	0.1776	0.1831	0.2135	0.22	0.2427	0.2382	0.2304	0.2417	0.0153	21.022	0.02524	3332	2957	2531	3943	2077	1848	2928	2183	47.19	30.48	38.65	44.43	94.24
PGAL8A_00008600	5085	1371	26.96	PF3D7_0309200	serine/threonine protein kinase, putative	Pfark-2	0.087	0.2586	0.3918	0.0148	0.4017	0.141	0.2581	0.3669	0.288	0.2907	0.2517	0.2512	0.3576	0.3736	0.2725	0.2789	0.3753	0.285	0.2895	0.3745	0.3847	0.2855	0.2919	0.3744	0.3705	0.4109	0.4143	0.022	55.744	0.10516	786	830	844	623	600	227	834	646	47.43	48.21	67.41	64.03	63.23
PGAL8A_00008700	2370	1197	50.51	PF3D7_0309300	N2227-like protein, putative		0.015	0.1294	0.2111	0.0142	0.1784	0.0661	0.1259	0.1688	0.112	0.1166	0.134	0.1259	0.1685	0.18	0.12	0.1251	0.2021	0.1703	0.1672	0.201	0.2095	0.1649	0.1617	0.1778	0.1865	0.197	0.2057	0.0183	63.732	0.06104	3748	2498	2239	682	2407	1543	2568	2463	70.89	64.95	72.06	77.48	48.97
PGAL8A_00008800	1731	1623	93.76	PF3D7_0309500	asparagine synthetase [glutamine-hydrolyzing], putative		0.0269	0.0696	0.0957	0.0029	0.0944	0.028	0.0708	0.0947	0.0953	0.0906	0.0718	0.0729	0.0952	0.0973	0.0997	0.0943	0.0985	0.0908	0.0819	0.1001	0.0974	0.0905	0.0813	0.1038	0.1063	0.1141	0.1124	0.0183	581.318	0.0192	3189	3553	3549	2972	3470	3209	3527	3441	95.38	94.06	94.55	96.73	68.55
PGAL8A_00008900	336	219	65.18	PF3D7_0309600	60S acidic ribosomal protein P2		0.0492	0.1068	0.0946	0	0.1663	0.0186	0.1078	0.144	0.1145	0.1083	0.0692	0.07	0.1052	0.1226	0.0925	0.0889	0.1048	0.077	0.0858	0.1055	0.0948	0.0775	0.0867	0.1244	0.1318	0.114	0.1204	0.0054	231.101	0.02626	2136	2879	3556	3943	2568	3621	2870	2782	98.37	99.32	98.75	98.89	98.77
PGAL8A_00009000	1305	477	36.55	PF3D7_0309700	SECIS-binding protein 2, putative		0.06	0.1769	0.3859	0	0.3847	0.1098	0.1759	0.3782	0.1524	0.1495	0.1736	0.1734	0.3638	0.4035	0.1402	0.1371	0.3738	0.1767	0.1758	0.373	0.3853	0.1763	0.1742	0.3551	0.3672	0.3676	0.3722	0.0157	8.656	0.04816	1652	1745	879	3943	679	571	1754	589	65.48	43.85	25.9	19.13	45.82
PGAL8A_00009100	834	543	65.11	PF3D7_0309800	YTH domain-containing protein, putative		0.0066	0.062	0.1459	0	0.1524	0.0336	0.0618	0.1513	0.1217	0.1248	0.0697	0.0695	0.1567	0.1567	0.1202	0.1216	0.1379	0.1284	0.1304	0.1382	0.146	0.1288	0.1308	0.1523	0.1444	0.1573	0.1434	0.0133	12.498	0.023	4081	3671	2958	3943	2741	2930	3672	2677	84.75	78.88	80.46	63.68	90.95
PGAL8A_00009200	4188	1617	38.61	PF3D7_0309900	conserved Plasmodium protein, unknown function		0.0828	0.2771	0.6935	0.0142	0.6436	0.18	0.2794	0.5495	0.317	0.3064	0.2714	0.2679	0.5362	0.6292	0.3004	0.296	0.5743	0.3553	0.3579	0.5709	0.6897	0.3536	0.3573	0.5584	0.5471	0.6368	0.6198	0.0483	19.555	0.1615	890	700	145	682	138	79	685	187	14	24.1	29.83	32.25	18.11
PGAL8A_00009300	588	399	67.86	PF3D7_0310000	50S ribosomal protein L9, apicoplast, putative		0.0643	0.1488	0.2156	0.0095	0.2375	0.0557	0.1444	0.2236	0.179	0.1904	0.1486	0.1442	0.2089	0.2229	0.1806	0.1695	0.1961	0.1748	0.191	0.187	0.2177	0.1797	0.1961	0.1856	0.178	0.2013	0.1881	0.0228	23.238	0.18164	1485	2194	2189	1301	1765	1936	2264	1774	6.76	32.28	59.04	54.31	81.76
PGAL8A_00009400	1665	1368	82.16	PF3D7_0310100	calcium-dependent protein kinase 3	PfCDPK3	0.016	0.0753	0.1259	0.0052	0.1172	0.0354	0.0758	0.1162	0.0774	0.0782	0.0779	0.0785	0.1226	0.1234	0.0851	0.0851	0.1261	0.0898	0.0912	0.1241	0.1239	0.0897	0.091	0.1168	0.1152	0.1128	0.1115	0.0076	1.885	0.02562	3699	3442	3172	2292	3194	2843	3436	3174	39.28	44.88	25.64	41.6	70.12
PGAL8A_00009500	14928	2646	17.73	PF3D7_0310200	phd finger protein, putative // phd finger protein, putative		0.0832	0.3783	0.5407	0.0129	0.4262	0.1392	0.3733	0.4064	0.3445	0.3572	0.3764	0.374	0.4103	0.4304	0.3427	0.3473	0.569	0.4219	0.4143	0.5622	0.5301	0.4123	0.4077	0.4183	0.4354	0.4573	0.4736	0.0465	65.335	0.08334	877	284	343	799	502	242	296	489	85.72	91.76	67.21	56.72	40.28
PGAL8A_00009600	3036	1752	57.71	PF3D7_0310300	phosphoglycerate mutase, putative		0.067	0.1894	0.304	0.0116	0.2757	0.0723	0.1908	0.2578	0.2617	0.251	0.1927	0.196	0.2645	0.2857	0.2522	0.2464	0.2803	0.2895	0.2841	0.2785	0.3019	0.29	0.2849	0.282	0.2706	0.2796	0.2754	0.0221	187.652	0.0422	1359	1554	1393	954	1373	1347	1537	1415	80.23	80.58	47.81	38.58	50.46
PGAL8A_00009700	3093	1773	57.32	PF3D7_0310400	parasite-infected erythrocyte surface protein // TVN-junction protein 1	TVN-JP1	0.0844	0.1655	0.4347	0.0032	0.4772	0.1489	0.1674	0.3786	0.3399	0.3221	0.1683	0.1703	0.3953	0.461	0.3342	0.314	0.3675	0.3357	0.3162	0.3657	0.4331	0.3403	0.3204	0.5079	0.493	0.5739	0.5691	0.0491	67.291	0.05856	853	1896	646	2874	375	176	1880	588	42.27	27.97	84.8	86.19	19.54
PGAL8A_00010000	438	393	89.73	PF3D7_0310700	trafficking protein particle complex subunit 4, putative	TRS23	0.0032	0.0249	0.0542	0	0.064	0.0034	0.025	0.0577	0.0551	0.0577	0.029	0.0283	0.0518	0.0583	0.0544	0.0572	0.0479	0.0543	0.057	0.0485	0.0548	0.0544	0.057	0.089	0.0921	0.0968	0.0998	0.003	59.047	0.0148	4181	4104	3931	3943	3805	4167	4107	3867	74.69	83.34	87.71	69.83	71.01
PGAL8A_00010100	330	264	80	PF3D7_0310800	conserved Plasmodium protein, unknown function		0.0333	0.0887	0.0806	0.0043	0.1314	0.0207	0.094	0.1428	0.193	0.1772	0.0738	0.079	0.125	0.1142	0.1817	0.1668	0.0915	0.1387	0.1295	0.0974	0.0866	0.1389	0.1298	0.2115	0.1976	0.2276	0.2151	0.0212	20.81	0.10544	2875	3220	3712	2565	3008	3540	3129	2801	77.48	87.35	89.65	81.39	76.86
PGAL8A_00010200	2130	1188	55.77	PF3D7_0310900	conserved Plasmodium protein, unknown function		0.0459	0.1841	0.3492	0.0058	0.3033	0.0582	0.1854	0.2869	0.2263	0.2376	0.1723	0.1736	0.2842	0.2984	0.2186	0.2279	0.3465	0.2621	0.2727	0.3477	0.3472	0.2624	0.2727	0.3588	0.368	0.3546	0.3652	0.0281	127.352	0.06142	2278	1627	1084	2098	1151	1830	1601	1135	53.87	39.28	64.46	66.28	30.79
PGAL8A_00010300	567	489	86.24	PF3D7_0311000	conserved Plasmodium protein, unknown function		0.0649	0.2593	0.3166	0.0156	0.3927	0.0685	0.2352	0.3969	0.2342	0.2341	0.2541	0.2291	0.38	0.3789	0.2381	0.2426	0.34	0.2741	0.2671	0.3341	0.3118	0.2753	0.268	0.3155	0.3109	0.326	0.3213	0.022	3.774	0.32394	1453	825	1295	557	639	1462	1030	518	24.55	14.12	11.82	16.57	78.9
PGAL8A_00010400	1584	318	20.08	PF3D7_0311100	pre-mRNA splicing factor, putative		0.0498	0.1044	0.1989	0.0036	0.1924	0.0514	0.1039	0.1968	0.1591	0.151	0.1156	0.119	0.1633	0.1626	0.1828	0.1587	0.1804	0.2004	0.1773	0.1849	0.2045	0.201	0.1824	0.2198	0.215	0.2362	0.2237	0.0207	92.311	0.03124	2107	2929	2364	2762	2248	2095	2935	2082	77.46	84.8	76.32	59.63	51.12
PGAL8A_00010500	3663	1851	50.53	PF3D7_0311200	valine--tRNA ligase, putative		0.0963	0.3113	0.5926	0.0099	0.5484	0.1355	0.3157	0.5118	0.3354	0.338	0.3175	0.3191	0.4659	0.5064	0.3536	0.3452	0.583	0.4159	0.4037	0.5714	0.5825	0.4019	0.3946	0.5652	0.5351	0.5886	0.5622	0.0576	18.402	0.10104	582	509	265	1208	245	273	491	235	32.87	63.1	37.41	42.26	39.9
PGAL8A_00010600	2760	1743	63.15	PF3D7_0311300	phosphatidylinositol 3- and 4-kinase, putative		0.0157	0.0699	0.1112	0.0049	0.0942	0.0359	0.07	0.0902	0.0728	0.0796	0.0705	0.0709	0.0888	0.0892	0.0794	0.0849	0.1112	0.0916	0.0977	0.1125	0.1116	0.0916	0.0967	0.0827	0.0888	0.0904	0.0959	0.0132	69.992	0.02094	3711	3541	3368	2382	3472	2819	3543	3487	39.81	48.16	87.26	90.01	71.2
PGAL8A_00010700	8928	2355	26.38	PF3D7_0311400	protein kinase, putative		0.1351	0.4164	0.7029	0.0287	0.743	0.1777	0.4218	0.6288	0.5302	0.5214	0.4499	0.4439	0.6274	0.7418	0.5438	0.5192	0.6422	0.5824	0.5433	0.6431	0.7062	0.5993	0.5531	0.6844	0.6789	0.7234	0.7182	0.0754	36.353	0.13266	197	198	134	81	73	80	193	108	28.24	8.93	11.75	35.43	27.11
PGAL8A_00010800	243	63	25.93	PF3D7_0311500	conserved Plasmodium protein, unknown function		0.082	0.3328	0.2089	0.0002	0.2125	0.0008	0.3134	0.2045	0.1619	0.2088	0.3423	0.3248	0.2695	0.2451	0.2412	0.2697	0.2049	0.284	0.2508	0.1987	0.199	0.2761	0.2448	0.1651	0.1965	0.16	0.1912	0.0419	6.442	0.00332	911	417	2264	3573	2028	4222	499	2004	81.88	53.8	41.61	25.44	69.5
PGAL8A_00010900	1971	1212	61.49	PF3D7_0311600	dolichyl-diphosphooligosaccharide--protein glycosyltransferase subunit 1, putative		0.0719	0.2573	0.3662	0.014	0.3015	0.0716	0.2491	0.2596	0.2125	0.2217	0.2511	0.2424	0.2471	0.2897	0.2275	0.2344	0.3305	0.2832	0.2863	0.3171	0.3523	0.276	0.2771	0.3079	0.3065	0.3616	0.3623	0.0314	10.596	0.08582	1195	840	990	700	1165	1368	901	1394	28.91	28.96	36.99	19.73	69.81
PGAL8A_00011000	1290	1095	84.88	PF3D7_0311700	plasmepsin VI		0.054	0.1424	0.2009	0.0071	0.1881	0.0538	0.1462	0.1781	0.1636	0.166	0.1435	0.1441	0.1808	0.1937	0.1626	0.1627	0.1999	0.1739	0.1749	0.202	0.2029	0.1784	0.1794	0.1959	0.195	0.2056	0.2048	0.01	20.459	0.09076	1914	2304	2349	1799	2301	2001	2227	2331	31.02	20.35	33.77	27.32	96.42
PGAL8A_00011100	1701	1293	76.01	PF3D7_0311800	conserved protein, unknown function		0.0344	0.213	0.2425	0.0224	0.2128	0.0336	0.211	0.1925	0.1365	0.1361	0.2131	0.2125	0.1976	0.2198	0.1471	0.1479	0.2364	0.1991	0.2046	0.2251	0.2323	0.1999	0.2057	0.1719	0.1794	0.1748	0.1812	0.0224	590.035	0.07536	2835	1256	1931	196	2022	2930	1289	2142	24.34	16.57	72.17	70.12	58.59
PGAL8A_00011200	2034	1032	50.74	PF3D7_0311900	conserved Plasmodium protein, unknown function		0.0377	0.2139	0.3314	0.0162	0.2444	0.039	0.2036	0.2389	0.1288	0.124	0.2083	0.1981	0.2353	0.2371	0.1229	0.118	0.3242	0.2132	0.2091	0.3134	0.3204	0.2057	0.2015	0.2319	0.2298	0.2405	0.2425	0.0123	4.436	0.06698	2650	1247	1188	511	1674	2653	1368	1612	17.73	36.96	23.97	37.98	23.64
PGAL8A_00011300	411	312	75.91	PF3D7_0312000	conserved Plasmodium protein, unknown function		0.0227	0.0996	0.1563	0.0001	0.1042	0.0165	0.0993	0.1138	0.1073	0.1057	0.1066	0.1062	0.1056	0.0957	0.0868	0.0912	0.1657	0.1354	0.1287	0.1651	0.1562	0.1325	0.1277	0.1168	0.1051	0.1143	0.1026	0.0215	15.518	0.0116	3378	3025	2842	3612	3352	3704	3036	3211	40.07	58.4	79.19	84.85	87.42
PGAL8A_00011400	2238	816	36.46	PF3D7_0312100	E3 ubiquitin-protein ligase, putative		0.0282	0.1226	0.2794	0.0044	0.247	0.0604	0.1241	0.2002	0.2063	0.2008	0.1337	0.1351	0.191	0.2475	0.217	0.2037	0.2368	0.257	0.258	0.2396	0.2792	0.2612	0.2615	0.296	0.2834	0.3442	0.3284	0.0617	27.283	0.02174	3120	2625	1588	2528	1645	1742	2601	2050	36.8	36.13	71.89	79.85	68.96
PGAL8A_00011500	3225	1509	46.79	PF3D7_0312200	tetratricopeptide repeat protein, putative		0.0866	0.3304	0.6669	0.0194	0.6313	0.1803	0.3243	0.5554	0.4076	0.4085	0.3291	0.3213	0.5266	0.5902	0.4361	0.4441	0.5831	0.507	0.5092	0.599	0.6698	0.5052	0.5022	0.6944	0.7631	0.7368	0.792	0.0801	18.258	0.10268	799	423	171	322	147	78	457	182	10.06	19.91	29.06	32.01	36.47
PGAL8A_00011600	1332	1020	76.58	PF3D7_0312400	glycogen synthase kinase 3	PfGSK3	0.0139	0.0624	0.1005	0.0025	0.0861	0.034	0.0615	0.0807	0.0711	0.0694	0.0573	0.0563	0.0806	0.0847	0.0774	0.0742	0.0977	0.0833	0.0854	0.0945	0.0987	0.0818	0.0838	0.1062	0.104	0.1007	0.0972	0.012	89.732	0.01688	3803	3664	3490	3104	3577	2907	3676	3622	60.1	81.98	94.06	93.61	89.3
PGAL8A_00011700	1818	678	37.29	PF3D7_0312500	major facilitator superfamily-related transporter, putative		0.0682	0.1946	0.2265	0.0038	0.239	0.0737	0.1955	0.2158	0.1788	0.1739	0.1855	0.1866	0.2152	0.2303	0.1831	0.1739	0.2345	0.1883	0.1803	0.236	0.2281	0.1844	0.178	0.1941	0.1912	0.1902	0.1827	0.0168	6.915	0.06884	1307	1478	2090	2709	1750	1299	1461	1869	58.33	80.41	48.88	40.04	64.25
PGAL8A_00012000	384	339	88.28	PF3D7_0312800	60S ribosomal protein L26, putative		0.0102	0.0288	0.0237	0.0002	0.0333	0.0004	0.029	0.0309	0.0441	0.0433	0.0317	0.0321	0.0275	0.0286	0.0394	0.039	0.0228	0.0392	0.039	0.0228	0.0237	0.0394	0.0391	0.0396	0.0392	0.0414	0.0408	0.0002	331.907	0.00836	3943	4072	4165	3573	4093	4240	4074	4111	97.28	97.33	95.08	93.66	97.92
PGAL8A_00012200	1605	222	13.83	PF3D7_0313000	conserved Plasmodium protein, unknown function		0.1647	0.7895	1.1788	0.0548	0.8116	0.2232	0.7612	0.8796	0.4742	0.4709	0.6674	0.7235	0.8442	0.9191	0.4732	0.4717	1.2008	0.6328	0.5701	1.0891	0.9609	0.6017	0.5592	0.6461	0.6593	0.6621	0.6715	0.0517	54.127	0.23534	105	17	13	9	52	25	18	26	69.69	45.46	38.95	37.13	48.16
PGAL8A_00012300	2187	1308	59.81	PF3D7_0313100	ubiquitin-protein ligase, putative		0.029	0.0967	0.2206	0.0018	0.2155	0.0742	0.0943	0.1852	0.1242	0.1203	0.1101	0.1074	0.1828	0.2161	0.1277	0.1243	0.1847	0.1501	0.145	0.1843	0.2192	0.1494	0.1444	0.1779	0.1762	0.1967	0.1961	0.0262	23.603	0.02092	3089	3079	2146	3312	1983	1278	3121	2239	64	81.39	77.95	73.29	49.2
PGAL8A_00012400	699	288	41.2	PF3D7_0313200	conserved Plasmodium protein, unknown function		0.0217	0.0937	0.1768	0.0127	0.1279	0.0579	0.0881	0.1247	0.0611	0.0713	0.0888	0.0872	0.1223	0.1285	0.0575	0.062	0.1594	0.1007	0.0897	0.1593	0.1705	0.099	0.0921	0.1233	0.1232	0.1333	0.1315	0.0169	32.681	0.08964	3428	3135	2607	827	3063	1837	3227	3045	49.12	47.29	48.66	50.96	69.92
PGAL8A_00012500	579	237	40.93	PF3D7_0313300	apicoplast conserved ycf19 protein precursor, unknown function		0.0383	0.138	0.2605	0.0001	0.2268	0.0441	0.1375	0.208	0.3048	0.2891	0.1091	0.1089	0.1854	0.1937	0.2802	0.2647	0.2344	0.2826	0.2668	0.2304	0.263	0.2862	0.2699	0.2655	0.2639	0.2912	0.2901	0.017	7.907	0.0689	2619	2379	1770	3612	1870	2421	2381	1966	50.29	38.67	50.11	48.02	58.65
PGAL8A_00012600	1749	405	23.16	PF3D7_0313400	conserved Plasmodium protein, unknown function		0.0644	0.2269	0.4261	0.0089	0.3623	0.1006	0.2309	0.282	0.2319	0.2394	0.2508	0.2566	0.3354	0.3822	0.2462	0.2675	0.3308	0.2935	0.2991	0.3225	0.4285	0.2958	0.301	0.3757	0.4069	0.425	0.4436	0.0314	9.782	0.09434	1481	1112	683	1417	787	704	1069	1182	56.4	58.3	28.23	28.67	41.11
PGAL8A_00012700	2406	1143	47.51	PF3D7_0313500	Ras-like G protein		0.0509	0.1587	0.3921	0.0137	0.4038	0.1337	0.1634	0.3763	0.2224	0.2186	0.1639	0.1653	0.3904	0.3889	0.2287	0.2201	0.3883	0.2423	0.2363	0.3929	0.401	0.2373	0.2314	0.421	0.4126	0.4384	0.435	0.0139	16.959	0.07756	2052	2018	841	726	595	291	1951	599	51.84	54.82	33.01	22.88	15.91
PGAL8A_00012800	2448	531	21.69	PF3D7_0313600	conserved Plasmodium protein, unknown function		0.0867	0.2033	0.3212	0.0044	0.3306	0.0567	0.2042	0.3225	0.3262	0.3303	0.1824	0.1839	0.3216	0.3132	0.3677	0.3567	0.2883	0.4171	0.4237	0.2881	0.3203	0.4187	0.4273	0.4296	0.4213	0.406	0.408	0.0299	47.613	0.04854	793	1364	1260	2528	965	1886	1354	889	3.01	39.31	43.47	30.02	38.38
PGAL8A_00013000	1710	957	55.96	PF3D7_0313800	conserved Plasmodium protein, unknown function		0.0822	0.262	0.5207	0.0099	0.5236	0.1277	0.267	0.4336	0.2674	0.2559	0.2728	0.2754	0.4114	0.5022	0.2754	0.2615	0.4731	0.3834	0.3693	0.4811	0.5394	0.3811	0.3669	0.449	0.4481	0.5223	0.5234	0.0315	62.232	0.08662	907	801	387	1208	286	344	772	418	13.19	50.46	65.38	52.35	46.49
PGAL8A_00013100	2763	927	33.55	PF3D7_0313900	conserved Plasmodium protein, unknown function		0.0871	0.4773	0.685	0.0325	0.6071	0.1747	0.4748	0.5812	0.287	0.2969	0.4363	0.4291	0.518	0.6055	0.2917	0.2866	0.5852	0.4605	0.4097	0.6277	0.7398	0.4718	0.4139	0.5457	0.515	0.623	0.5899	0.042	12.154	0.1035	778	120	155	55	171	89	123	151	5.64	20.86	14.82	21.01	39.61
PGAL8A_00013200	1068	525	49.16	PF3D7_0314000	co-chaperone p23		0.0296	0.0894	0.1264	0.0096	0.1363	0.0535	0.0952	0.1298	0.1347	0.142	0.0877	0.0909	0.135	0.1439	0.1422	0.1491	0.1079	0.1241	0.1256	0.1159	0.1347	0.132	0.1335	0.1712	0.1725	0.1749	0.1764	0.0078	200.513	0.04846	3058	3203	3167	1279	2935	2021	3100	2976	45.98	55.08	84.85	91.45	87.97
PGAL8A_00013500	3564	1254	35.19	PF3D7_0314200	conserved Plasmodium protein, unknown function		0.0937	0.2966	0.5859	0.0086	0.485	0.1283	0.2929	0.419	0.2901	0.2868	0.2752	0.2775	0.4364	0.4979	0.2706	0.2679	0.5072	0.3741	0.3671	0.5119	0.5916	0.3753	0.3687	0.4285	0.4381	0.4865	0.4953	0.0175	15.98	0.11594	628	579	270	1492	355	338	600	456	14.99	38.53	40	44.07	17.9
PGAL8A_00013600	1098	729	66.39	PF3D7_0314300	DER1-like protein	PfsDer1-2	0.0212	0.1067	0.185	0.0068	0.1797	0.07	0.1037	0.1715	0.1194	0.1139	0.102	0.0989	0.163	0.178	0.1186	0.1136	0.1637	0.1418	0.1306	0.1556	0.1772	0.1359	0.125	0.1871	0.1762	0.1754	0.1663	0.0088	8.175	0.04774	3453	2882	2510	1864	2397	1415	2942	2422	16.62	24.03	31.21	38.84	23.66
PGAL8A_00013700	927	879	94.82	PF3D7_0314400	serine/threonine protein phosphatase 6, putative		0.0014	0.015	0.0165	0.0013	0.0095	0.003	0.0136	0.009	0.0182	0.017	0.0136	0.012	0.0092	0.0082	0.0195	0.018	0.0179	0.0281	0.0268	0.016	0.0149	0.0265	0.0251	0.0183	0.0166	0.0176	0.0157	0.0014	90.01	0.00472	4231	4199	4210	3426	4256	4186	4208	4253	79.85	75.73	69.67	63.7	84.33
PGAL8A_00013800	669	267	39.91	PF3D7_0314500	conserved Plasmodium protein, unknown function		0.0231	0.1048	0.1511	0	0.1661	0.0103	0.1049	0.1624	0.1548	0.1594	0.0952	0.0952	0.1294	0.1331	0.1199	0.124	0.1479	0.1088	0.1154	0.148	0.1511	0.1088	0.1154	0.0961	0.0983	0.0997	0.1029	0.013	40.296	0.13266	3354	2916	2887	3943	2570	3948	2922	2549	68.58	74	43.19	42.79	29.1
PGAL8A_00013900	726	276	38.02	PF3D7_0314600	conserved Plasmodium protein, unknown function		0.1476	0.3311	0.3354	0.0084	0.2843	0.0811	0.3357	0.3214	0.2607	0.2675	0.3668	0.364	0.2819	0.2898	0.2008	0.2161	0.3133	0.2694	0.2697	0.3028	0.3233	0.2732	0.2719	0.2628	0.2807	0.224	0.2396	0.0158	37.079	0.15976	147	420	1165	1519	1297	1089	409	896	76.61	80.66	58.66	70.17	56.27
PGAL8A_00014000	3117	687	22.04	PF3D7_0314700	zinc finger protein, putative		0.0353	0.6981	0.7439	0.0275	0.2615	0.0561	0.7151	0.2811	0.3468	0.3523	0.724	0.7486	0.2843	0.2672	0.3473	0.3538	0.742	0.8633	0.8805	0.7354	0.7368	0.8461	0.8627	0.4073	0.4147	0.4032	0.4163	0.0239	125.048	0.17386	2775	27	108	103	1503	1913	24	1187	27.92	37.1	50.63	38.36	86.53
PGAL8A_00014100	837	471	56.27	PF3D7_0210900	conserved Plasmodium protein, unknown function		0.0214	0.1944	0.2674	0.0051	0.1935	0.0763	0.2007	0.2428	0.2042	0.2022	0.1936	0.196	0.2435	0.1939	0.1999	0.1899	0.3277	0.2273	0.227	0.3159	0.2581	0.2333	0.2328	0.332	0.3183	0.2619	0.2567	0.0187	148.551	0.13592	3441	1481	1699	2320	2226	1222	1408	1568	87.78	84.82	82.43	71.56	35.66
PGAL8A_00014300	1149	546	47.52	PF3D7_0210800	conserved Plasmodium protein, unknown function		0.1527	0.7528	1.0845	0.0042	0.8725	0.15	0.7422	0.7416	0.6604	0.6739	0.7367	0.7236	0.7644	0.7673	0.5586	0.5361	0.9235	0.7519	0.7749	0.9147	1.069	0.7704	0.7933	0.6917	0.8477	0.8061	0.8872	0.0467	5.333	0.23482	129	22	17	2591	35	172	21	53	62.75	54.04	26.42	31.88	66.38
PGAL8A_00014400	942	759	80.57	PF3D7_0210700	syntaxin, Qa-SNARE family	Stx1	0.0442	0.1395	0.2419	0.0045	0.1955	0.0332	0.1351	0.1778	0.2033	0.206	0.1447	0.1411	0.1894	0.2049	0.1868	0.1889	0.2395	0.216	0.205	0.2373	0.2397	0.2127	0.2015	0.2176	0.2069	0.2456	0.2318	0.0243	46.238	0.05112	2365	2356	1936	2491	2209	2953	2414	2334	14.77	16.19	24.84	26.03	49.01
PGAL8A_00014500	1344	933	69.42	PF3D7_0210600	conserved Plasmodium protein, unknown function		0.0274	0.1454	0.1293	0.0056	0.1756	0.0306	0.1428	0.1742	0.181	0.1774	0.1433	0.141	0.18	0.1813	0.185	0.1773	0.1325	0.1569	0.1595	0.1313	0.1277	0.1545	0.157	0.1475	0.1484	0.1581	0.1595	0.0122	11.425	0.04762	3159	2240	3131	2148	2453	3087	2290	2390	32.18	30.21	77.91	89.29	61.21
PGAL8A_00014600	3705	1680	45.34	PF3D7_0210500	conserved Plasmodium protein, unknown function		0.075	0.3511	0.7558	0.0143	0.7569	0.1456	0.3461	0.6444	0.4192	0.4178	0.3423	0.3329	0.5928	0.7042	0.4017	0.4174	0.6526	0.4524	0.4885	0.6484	0.7604	0.4519	0.4848	0.6932	0.6261	0.7474	0.7191	0.0665	18.066	0.36306	1111	362	99	671	65	195	375	99	25.21	50.89	20.24	20.1	39.78
PGAL8A_00014700	360	324	90	PF3D7_0210400	50S ribosomal protein L33, putative		0.0001	0.023	0.0313	0	0.043	0.004	0.0229	0.0355	0.049	0.0454	0.023	0.023	0.0348	0.0426	0.0495	0.0457	0.0257	0.0537	0.0498	0.0254	0.0314	0.0535	0.0497	0.0576	0.0545	0.0535	0.0508	0.0075	128.136	0.0053	4280	4122	4114	3943	4008	4150	4125	4076	54.01	67.45	77.13	48.85	74.38
PGAL8A_00014800	1374	1176	85.59	PF3D7_0210300	monocarboxylate transporter, putative		0.0185	0.0619	0.099	0.0057	0.0871	0.0276	0.0626	0.0895	0.0539	0.0587	0.0625	0.0635	0.091	0.089	0.055	0.0588	0.1031	0.0567	0.0602	0.104	0.0999	0.054	0.0574	0.0869	0.0854	0.0887	0.0894	0.0118	17.851	0.0237	3580	3673	3509	2121	3563	3226	3664	3505	28.98	50.25	78.66	74.88	65.8
PGAL8A_00014900	6447	3570	55.37	PF3D7_0210200	conserved Plasmodium protein, unknown function		0.0357	0.1462	0.2484	0.0096	0.2075	0.0533	0.1438	0.1875	0.1679	0.1629	0.1448	0.141	0.1778	0.1977	0.154	0.1506	0.2345	0.1947	0.192	0.2315	0.2474	0.1931	0.1904	0.237	0.2326	0.2578	0.2576	0.0266	72.267	0.0357	2764	2225	1872	1279	2083	2026	2275	2198	35.17	56.17	72.86	74.71	65.07
PGAL8A_00015100	249	237	95.18	PF3D7_0210000	secretory complex protein 61 gamma subunit		0.0214	0.067	0.0846	0.011	0.1337	0.0589	0.0777	0.1315	0.135	0.1345	0.0683	0.0799	0.1202	0.1385	0.139	0.1381	0.1007	0.1183	0.1177	0.1158	0.084	0.1028	0.1023	0.1608	0.1587	0.1366	0.1346	0.0001	13.901	0.08366	3441	3593	3670	1046	2971	1806	3404	2953	94.5	95.27	96.68	94.67	95.71
PGAL8A_00015200	1431	1245	87	PF3D7_0209800	ATP-dependent RNA helicase UAP56	PfU52	0.0019	0.0103	0.0166	0.001	0.0152	0.0023	0.0094	0.0146	0.0194	0.0192	0.0084	0.0075	0.0157	0.0161	0.0201	0.0199	0.0159	0.0233	0.0232	0.0147	0.0152	0.0244	0.0243	0.0299	0.0297	0.0333	0.0331	0.0001	627.574	0.00508	4220	4235	4209	3496	4228	4204	4241	4226	97.04	96.38	96.49	94.77	83.4
PGAL8A_00015400	2940	1944	66.12	PF3D7_0209600	transporter, putative		0.0394	0.1048	0.1539	0.0068	0.1415	0.0432	0.1015	0.1371	0.2066	0.2065	0.1093	0.1056	0.1509	0.1513	0.2107	0.2122	0.1506	0.2113	0.2176	0.1502	0.1535	0.2134	0.2177	0.2258	0.2226	0.2214	0.2162	0.0173	26.189	0.04162	2569	2916	2870	1864	2871	2462	2987	2872	57.78	35.38	76.7	89.56	32.13
PGAL8A_00015500	1494	441	29.52	PF3D7_0209500	conserved Plasmodium protein, unknown function		0.127	0.5328	0.7478	0.021	0.8517	0.0876	0.532	0.7436	0.6279	0.7392	0.5281	0.5207	0.7205	0.8209	0.589	0.7135	0.7373	0.5662	0.5308	0.7276	0.7333	0.5461	0.5273	0.637	0.7006	0.6906	0.7262	0.1051	1.343	0.17966	244	74	105	260	40	945	75	52	31.37	9.94	11.77	30.74	8.26
PGAL8A_00015600	1353	1203	88.91	PF3D7_0209400	conserved protein, unknown function		0.0608	0.1284	0.2229	0.001	0.2133	0.0611	0.1298	0.2244	0.1989	0.1898	0.1339	0.1353	0.2388	0.2313	0.2243	0.2127	0.233	0.2199	0.2015	0.2354	0.2253	0.2218	0.2044	0.2909	0.2843	0.27	0.2656	0.0219	63.118	0.03872	1619	2521	2122	3496	2016	1711	2496	1759	43.24	48.57	46.44	48.44	36.68
PGAL8A_00015700	702	372	52.99	PF3D7_0209300	2C-methyl-D-erythritol 2,4-cyclodiphosphate synthase		0.08	0.1512	0.2976	0	0.2957	0.0569	0.1502	0.2916	0.1796	0.1851	0.1809	0.1794	0.2858	0.3173	0.2079	0.2148	0.2995	0.2	0.2046	0.298	0.2966	0.1992	0.2038	0.2765	0.2704	0.2883	0.2794	0.0272	22.524	0.07258	959	2155	1456	3943	1205	1877	2161	1095	35.76	53.94	38.08	36.28	58.87
PGAL8A_00015800	789	642	81.37	PF3D7_0209200	3'exoribonuclease, putative		0.0188	0.123	0.1768	0.0037	0.1027	0.0172	0.1204	0.1084	0.0955	0.0983	0.1248	0.1224	0.108	0.1029	0.1003	0.0955	0.183	0.155	0.1605	0.1801	0.1738	0.1526	0.158	0.1317	0.131	0.1338	0.1332	0.0078	14.357	0.04178	3568	2618	2607	2737	3376	3667	2657	3269	73.67	68.67	53.73	38.96	66.12
PGAL8A_00015900	2007	1602	79.82	PF3D7_0209100	phospholipase A2, putative		0.0309	0.0854	0.1711	0.0029	0.1693	0.0531	0.0866	0.1674	0.1835	0.1859	0.0964	0.0966	0.1563	0.1625	0.1878	0.1898	0.1634	0.1969	0.1976	0.1638	0.1716	0.1979	0.1987	0.2253	0.2274	0.2324	0.2372	0.0145	58.295	0.03792	3006	3284	2660	2972	2542	2035	3256	2477	78.8	64.58	76.67	80.25	50.16
PGAL8A_00016000	8544	5520	64.61	PF3D7_0209000	6-cysteine protein // transmission-blocking target antigen s230	Pfs230	0.1212	0.2856	0.4628	0.0221	0.4401	0.1366	0.2876	0.412	0.4033	0.4065	0.288	0.2934	0.4166	0.4381	0.4069	0.4038	0.4284	0.4147	0.4167	0.4301	0.4671	0.4193	0.4191	0.4979	0.5108	0.5398	0.5512	0.0337	372.623	0.06182	294	639	541	206	473	267	636	473	27	27.35	8.52	16.18	58.46
PGAL8A_00016100	6672	4734	70.95	PF3D7_0208900	6-cysteine protein	PfsMR5	0.0783	0.263	0.3783	0.0121	0.3387	0.0936	0.258	0.3147	0.3038	0.3077	0.2665	0.2605	0.3207	0.3489	0.3166	0.3194	0.3687	0.3507	0.3467	0.3636	0.379	0.3488	0.3468	0.3743	0.3686	0.41	0.408	0.027	13.341	0.04082	1000	796	922	889	920	814	835	948	28.67	19.89	11.08	10.37	10.16
PGAL8A_00016200	636	396	62.26	PF3D7_0208800	conserved Plasmodium protein, unknown function		0.0654	0.2655	0.4328	0.0432	0.267	0.0566	0.2601	0.2885	0.1954	0.1963	0.2806	0.2562	0.2794	0.2607	0.1804	0.174	0.4777	0.3388	0.3045	0.5062	0.4491	0.3046	0.2774	0.2961	0.2827	0.2552	0.243	0.0334	117.416	0.08262	1430	781	655	16	1444	1891	824	1119	58.96	61.68	59.26	54.99	92.23
PGAL8A_00016400	1200	411	34.25	PF3D7_0208600	ribosome-recycling factor		0.0369	0.0872	0.2656	0.0001	0.2346	0.0574	0.0875	0.2107	0.1255	0.1341	0.0936	0.0939	0.2258	0.2486	0.1312	0.141	0.2568	0.1224	0.1399	0.2579	0.2663	0.1229	0.1406	0.2477	0.2361	0.2447	0.2424	0.0318	45.829	0.01686	2698	3248	1719	3612	1794	1858	3239	1930	44.43	70.73	82.66	73.48	35.42
PGAL8A_00016500	405	336	82.96	PF3D7_0208500	acyl carrier protein	PfACP	0.0147	0.0912	0.2004	0	0.2171	0.0489	0.0915	0.2191	0.1447	0.1458	0.0821	0.0823	0.1974	0.2035	0.1564	0.1581	0.2098	0.149	0.1441	0.2101	0.2007	0.1495	0.1445	0.255	0.2569	0.2312	0.2184	0.0329	28.144	0.01528	3766	3177	2353	3943	1965	2208	3169	1825	30.23	33.77	57.52	61.38	72.03
PGAL8A_00016600	5889	1269	21.55	PF3D7_0208400	conserved Plasmodium protein, unknown function		0.0305	0.1634	0.2962	0.0158	0.2605	0.071	0.1594	0.2456	0.2701	0.2739	0.166	0.1639	0.2512	0.2655	0.2658	0.2709	0.279	0.2673	0.2749	0.2711	0.2954	0.2666	0.274	0.3388	0.3502	0.3532	0.3666	0.059	21.35	0.04894	3025	1943	1468	537	1516	1384	2019	1544	61.83	64.46	60.01	68.34	50.3
PGAL8A_00016700	4644	1515	32.62	PF3D7_0208300	conserved Plasmodium protein, unknown function		0.1028	0.3382	0.7532	0.0206	0.7263	0.1684	0.3397	0.6228	0.4935	0.5134	0.3328	0.3345	0.587	0.6745	0.5095	0.5255	0.7068	0.5309	0.5451	0.7331	0.7602	0.5364	0.5572	0.6967	0.6784	0.7987	0.7909	0.1071	5.62	0.1545	484	404	101	271	79	106	396	113	56.57	51.95	28.67	27.89	45.65
PGAL8A_00016800	906	678	74.83	PF3D7_0208200	KRR1 small subunit processome component, putative		0.0105	0.0319	0.0402	0.0002	0.0464	0.0176	0.032	0.0397	0.0403	0.0418	0.0228	0.0228	0.0327	0.039	0.0299	0.0314	0.0378	0.0467	0.0482	0.038	0.0402	0.0471	0.0485	0.0485	0.0502	0.0574	0.0596	0.003	93.234	0.00626	3938	4046	4035	3573	3978	3655	4045	4043	83.76	78.32	63.37	32.53	44.24
PGAL8A_00017200	495	378	76.36	PF3D7_0207200	iron-sulfur assembly protein, putative		0.0778	0.1266	0.2364	0.0073	0.243	0.0533	0.1274	0.2142	0.1953	0.1849	0.1172	0.1222	0.1721	0.2035	0.2099	0.1919	0.2209	0.2443	0.2215	0.2284	0.2439	0.2522	0.2294	0.2834	0.2789	0.3407	0.3532	0.0266	12.523	0.14806	1023	2549	1994	1749	1700	2026	2541	1888	15.72	13.55	21.88	40.06	52.66
PGAL8A_00017400	4713	2079	44.11	PF3D7_0207100	conserved Plasmodium protein, unknown function		0.1395	0.4068	0.6331	0.0159	0.5985	0.1386	0.4178	0.591	0.4507	0.4695	0.3985	0.407	0.5866	0.5835	0.4588	0.4689	0.6423	0.5018	0.5056	0.6741	0.6618	0.5183	0.5144	0.6344	0.6459	0.6547	0.6835	0.0277	41.958	0.1225	179	214	204	529	179	244	201	143	32.72	41.53	61.78	75.8	50.32
PGAL8A_00017500	678	183	26.99	PF3D7_0207000	merozoite surface protein 4		0.4225	0.5472	0.4426	0.0722	0.5446	0.1461	0.4847	0.4733	0.8627	0.6598	0.3834	0.4362	0.4807	0.4248	0.5949	0.6271	0.4564	0.7856	0.7473	0.4286	0.4311	0.7099	0.6985	0.6469	0.5324	0.551	0.5177	0.0802	337.596	0.17528	10	67	614	4	252	189	109	309	69.14	62.19	97.68	99.17	93.89
PGAL8A_00017800	1413	1149	81.32	PF3D7_0206700	adenylosuccinate lyase	ASL	0.0465	0.1436	0.2452	0.0041	0.188	0.0601	0.1419	0.1757	0.1608	0.1546	0.1523	0.1507	0.1716	0.1843	0.1721	0.1703	0.2272	0.1909	0.1891	0.2281	0.246	0.1914	0.1872	0.2046	0.2064	0.2151	0.2217	0.0239	99.124	0.03202	2254	2277	1900	2624	2302	1759	2311	2366	86.83	85.98	79.18	81.6	65.43
PGAL8A_00017900	321	273	85.05	PF3D7_0206600	DNA-directed RNA polymerase III subunit RPC10, putative		0.0135	0.0314	0.0514	0.0002	0.0568	0.0414	0.0317	0.0732	0.0571	0.0568	0.0459	0.0459	0.0912	0.076	0.0606	0.0605	0.0669	0.0548	0.0549	0.0668	0.0513	0.055	0.0548	0.0605	0.061	0.0329	0.0328	0.0001	13.527	0.01122	3812	4051	3953	3573	3886	2533	4048	3713	78.74	69.12	33.41	5.14	54.89
PGAL8A_00018000	2469	759	30.74	PF3D7_0206500	conserved Plasmodium protein, unknown function		0.1258	0.4717	0.6479	0.0124	0.6833	0.1463	0.4784	0.5858	0.6043	0.57	0.4611	0.4622	0.6314	0.627	0.649	0.639	0.6637	0.7444	0.6918	0.6787	0.6461	0.749	0.7117	0.7138	0.7472	0.709	0.7226	0.0708	30.115	0.08178	254	127	192	858	102	188	118	146	78.12	80.63	61.64	56.15	29.44
PGAL8A_00018100	1617	1215	75.14	PF3D7_0206200	pantothenate transporter		0.0322	0.0814	0.061	0.002	0.0762	0.013	0.0812	0.0743	0.1025	0.1013	0.0792	0.0791	0.0689	0.0675	0.0976	0.0964	0.0645	0.0863	0.0843	0.0646	0.0589	0.0861	0.0843	0.0855	0.0868	0.0883	0.088	0.0089	10.693	0.01668	2941	3353	3865	3240	3692	3848	3350	3700	54.46	37.08	68.55	82.74	38.01
PGAL8A_00018200	729	504	69.14	PF3D7_0206100	cysteine desulfuration protein SufE	PfSufE	0.0498	0.108	0.2359	0.0076	0.182	0.0497	0.1016	0.1861	0.1313	0.1316	0.1308	0.1239	0.1794	0.1738	0.1392	0.1394	0.2402	0.1863	0.1813	0.2315	0.2359	0.1782	0.1775	0.2233	0.2073	0.2257	0.2243	0.0158	11.989	0.09828	2107	2861	2002	1690	2372	2168	2985	2221	70.43	76.44	64.51	61.74	69.78
PGAL8A_00018300	4833	1809	37.43	PF3D7_0206000	DNA repair protein RAD2, putative	XPG	0.0617	0.1248	0.1696	0.0072	0.1672	0.0655	0.1275	0.1689	0.1815	0.1822	0.1317	0.1335	0.179	0.1764	0.1932	0.1885	0.1718	0.184	0.1863	0.1687	0.165	0.1844	0.1877	0.2153	0.2076	0.2118	0.2076	0.0317	58.985	0.05776	1575	2585	2679	1776	2559	1557	2539	2460	61.69	62.64	42.93	58.73	18.23
PGAL8A_00018400	2817	2211	78.49	PF3D7_0205900	26S proteasome regulatory subunit RPN1, putative		0.01	0.0324	0.0611	0.0005	0.0552	0.0212	0.033	0.0532	0.0606	0.0599	0.0321	0.0327	0.0552	0.0552	0.0595	0.061	0.06	0.0637	0.061	0.0604	0.0617	0.0644	0.0618	0.0669	0.0664	0.0732	0.0732	0.0093	201.763	0.01034	3949	4041	3863	3561	3904	3511	4031	3910	85.98	90.72	94.81	97.02	89.03
PGAL8A_00018500	363	354	97.52	PF3D7_0205800	PH domain-containing protein, putative		0.0478	0.0682	0.0969	0.0035	0.1178	0.0263	0.0718	0.0978	0.1057	0.0973	0.078	0.0817	0.0633	0.0819	0.1124	0.0965	0.0896	0.1119	0.1226	0.0845	0.0916	0.1061	0.1275	0.138	0.1316	0.155	0.1483	0.0279	11.464	0.0604	2196	3574	3534	2791	3185	3291	3509	3402	75.4	66.06	81.25	84.87	89.6
PGAL8A_00018700	1842	1338	72.64	PF3D7_0205600	conserved Plasmodium protein, unknown function		0.0153	0.0613	0.1211	0.0001	0.1132	0.0317	0.0616	0.0993	0.1039	0.108	0.0653	0.0656	0.1009	0.1126	0.1093	0.1136	0.1072	0.1091	0.1124	0.1076	0.1213	0.1096	0.1128	0.1452	0.1495	0.161	0.1621	0.014	15.502	0.00894	3735	3678	3229	3612	3242	3036	3675	3380	54.58	66.78	73.07	70.57	61.59
PGAL8A_00018800	399	393	98.5	PF3D7_0205500	DNA-directed RNA polymerase II 16 kDa subunit, putative		0.0118	0.0239	0.0622	0	0.0499	0.0102	0.0239	0.0525	0.0684	0.0611	0.0364	0.0364	0.0672	0.0649	0.0828	0.0757	0.0652	0.0806	0.073	0.0653	0.0622	0.0807	0.0731	0.1058	0.1028	0.103	0.0998	0.0061	23.836	0.0061	3884	4112	3852	3943	3944	3956	4117	3918	84.32	73.95	76.91	54.93	88.96
PGAL8A_00018900	1341	1032	76.96	PF3D7_0205400	PCI domain-containing protein, putative		0.0183	0.0922	0.1744	0.0048	0.155	0.0413	0.0886	0.1405	0.0913	0.0913	0.0924	0.0886	0.1484	0.1615	0.0899	0.0889	0.152	0.1047	0.1052	0.1473	0.1696	0.103	0.1035	0.1553	0.159	0.1702	0.1704	0.0061	34.68	0.01298	3594	3160	2633	2414	2715	2545	3221	2829	78.45	63.39	49.71	35.49	67.65
PGAL8A_00019000	1569	681	43.4	PF3D7_0205300	conserved Plasmodium protein, unknown function		0.0947	0.5444	0.7758	0.0271	0.5835	0.1202	0.5788	0.5127	0.403	0.3732	0.6163	0.649	0.5408	0.599	0.4351	0.4071	0.7285	0.6469	0.632	0.692	0.7554	0.6547	0.6397	0.511	0.4811	0.5592	0.5442	0.026	3.896	0.17794	611	70	85	107	195	424	56	232	10.44	19.96	12.83	14.3	40.33
PGAL8A_00019100	597	330	55.28	PF3D7_0205200	conserved Plasmodium protein, unknown function		0.0739	0.1986	0.3576	0.008	0.3232	0.0945	0.2025	0.2788	0.1881	0.1903	0.2356	0.2417	0.2578	0.2907	0.2395	0.2327	0.378	0.2419	0.2627	0.3946	0.3676	0.2525	0.2734	0.3285	0.3339	0.335	0.3415	0.0301	6.701	0.07914	1137	1428	1034	1601	1020	799	1380	1209	19.22	6.73	17.74	5.14	36.16
PGAL8A_00019200	2241	426	19.01	PF3D7_0205100	conserved Plasmodium protein, unknown function		0.2745	0.7367	1.07	0.0126	1.0158	0.2487	0.7281	1.1193	0.8497	0.8997	0.6311	0.6049	0.8456	0.8322	0.7097	0.7472	20.1228	0.8026	0.8605	1.1384	1.0501	0.7916	0.819	0.9907	0.9865	1.1082	1.0484	0.0509	2.735	0.16056	23	23	20	835	13	15	22	7	20.88	14.5	12.1	13.64	32.65
PGAL8A_00019400	1074	837	77.93	PF3D7_0204900	2-methoxy-6-polyprenyl-1,4-benzoquinol methylase, mitochondrial, putative		0.0605	0.1599	0.2448	0.0158	0.2277	0.0895	0.1669	0.1915	0.1636	0.1617	0.1477	0.1564	0.1757	0.2059	0.1598	0.1579	0.2318	0.1967	0.1942	0.2322	0.251	0.2001	0.1976	0.2233	0.2206	0.2385	0.241	0.0317	17.242	0.06396	1629	2000	1902	537	1856	896	1887	2154	36.75	49.68	68.34	59.84	78.45
PGAL8A_00019500	1101	813	73.84	PF3D7_0204800	3'-5' exonuclease, putative		0.0613	0.2509	0.3129	0.0143	0.2557	0.0604	0.2567	0.2223	0.163	0.1624	0.2565	0.267	0.2376	0.2747	0.1757	0.175	0.3077	0.2743	0.2656	0.3097	0.3142	0.2793	0.2738	0.2243	0.2286	0.2468	0.241	0.0189	7.545	0.08532	1592	886	1330	671	1558	1742	845	1793	19.59	40.47	42.88	38.87	71.68
PGAL8A_00019600	1509	1176	77.93	PF3D7_0204700	hexose transporter	PfHT	0.0404	0.075	0.103	0.0032	0.101	0.063	0.0753	0.1251	0.1281	0.1237	0.0778	0.081	0.1144	0.0989	0.1393	0.1371	0.1135	0.1352	0.1333	0.1134	0.106	0.1382	0.1352	0.1466	0.1556	0.1313	0.1363	0.0202	635.327	0.0295	2533	3445	3458	2874	3393	1639	3445	3037	86.05	91.86	90.25	91.48	89.22
PGAL8A_00019700	2778	1149	41.36	PF3D7_0204600	5'-3' exonuclease, putative		0.0844	0.2337	0.3643	0.0099	0.3803	0.0782	0.2393	0.3606	0.215	0.2213	0.2127	0.213	0.3215	0.3429	0.2024	0.2126	0.352	0.2307	0.2328	0.3492	0.359	0.2389	0.2389	0.3324	0.3265	0.3603	0.3583	0.0373	13.635	0.08086	853	1045	1000	1208	700	1168	991	677	49.35	57.92	31.78	44.75	13.14
PGAL8A_00019800	1218	936	76.85	PF3D7_0204500	aspartate transaminase // aspartate aminotransferase	PfAspAT	0.0571	0.1981	0.2541	0.0111	0.2314	0.0732	0.1927	0.2087	0.2377	0.2307	0.1909	0.1885	0.2301	0.2433	0.2362	0.2289	0.2263	0.2383	0.2367	0.2277	0.2496	0.2366	0.2375	0.2982	0.3016	0.2966	0.3031	0.0307	13.66	0.07936	1771	1433	1815	1026	1823	1321	1510	1958	75.19	63.87	51.2	45.83	11.75
PGAL8A_00019900	324	318	98.15	PF3D7_0204400	dynein light chain, putative		0.0154	0.0486	0.0434	0.0001	0.0431	0.0042	0.0484	0.0463	0.0755	0.066	0.0562	0.0558	0.0573	0.0544	0.0634	0.0655	0.047	0.0569	0.0529	0.0469	0.0433	0.0566	0.0526	0.0688	0.0587	0.0668	0.0564	0.0083	5.56	0.01578	3727	3854	4015	3612	4005	4146	3854	3982	76.6	61.56	43.28	31.36	6.66
PGAL8A_00020000	1911	477	24.96	PF3D7_0204300	conserved Plasmodium protein, unknown function		0.1955	0.4506	1.0327	0.01	1.1362	0.1822	0.4293	1.1098	0.6156	0.6814	0.5614	0.5225	1.0758	1.0912	1.0506	1.0319	1.0927	0.8543	1.1593	1.118	0.9998	0.9054	1.0603	1.1106	1.0495	1.2104	8.767	0.0956	5.244	0.15766	61	151	23	1192	9	72	176	10	75.68	65.86	35.88	30.45	10.63
PGAL8A_00020100	816	459	56.25	PF3D7_0204200	conserved Plasmodium protein, unknown function		0.0382	0.1648	0.237	0.0027	0.1941	0.0342	0.1683	0.189	0.2478	0.2205	0.1808	0.1847	0.1955	0.1849	0.244	0.2162	0.2413	0.2782	0.2641	0.2458	0.2415	0.2838	0.2686	0.26	0.2356	0.2253	0.1994	0.028	21.932	0.05458	2625	1911	1984	3043	2220	2895	1866	2181	88.77	90.79	87.14	82.81	91.09
PGAL8A_00020200	6078	2388	39.29	PF3D7_0204100	conserved Plasmodium protein, unknown function		0.0705	0.1537	0.2147	0.0176	0.2198	0.0783	0.1569	0.1963	0.2339	0.2447	0.1584	0.1587	0.1927	0.2221	0.2441	0.2499	0.1876	0.2407	0.2454	0.1899	0.2151	0.2425	0.2485	0.2834	0.2898	0.3212	0.3313	0.0428	94.583	0.04032	1243	2109	2196	404	1940	1166	2061	2090	40.16	43.03	82.17	94.58	56.22
PGAL8A_00020300	2004	1269	63.32	PF3D7_0204000	condensin-2 complex subunit H2, putative		0.0451	0.1698	0.252	0.0083	0.2139	0.0729	0.1663	0.1984	0.2348	0.2439	0.171	0.1684	0.202	0.2146	0.2323	0.2356	0.2428	0.2674	0.2731	0.2398	0.2493	0.2618	0.2655	0.3056	0.3046	0.3263	0.3323	0.0324	19.156	0.043	2319	1844	1834	1544	2010	1328	1905	2062	17.02	33.74	32.32	27.25	15.72
PGAL8A_00020400	1281	771	60.19	PF3D7_0203900	5'-3' exonuclease, N-terminal resolvase-like domain, putative		0.039	0.1063	0.2067	0.0059	0.1863	0.073	0.1023	0.1791	0.1588	0.165	0.1109	0.1065	0.1954	0.2108	0.1753	0.1793	0.1949	0.1704	0.1742	0.1947	0.2063	0.1651	0.1694	0.1927	0.1965	0.2187	0.2196	0.0199	7.32	0.052	2591	2887	2292	2068	2323	1325	2971	2318	25.55	59.96	68.76	65.48	24.67
PGAL8A_00020500	1614	1278	79.18	PF3D7_0203800	conserved Plasmodium protein, unknown function		0.0312	0.083	0.1685	0.003	0.157	0.0223	0.0807	0.159	0.0806	0.0857	0.084	0.0816	0.1585	0.1565	0.087	0.0935	0.1647	0.0946	0.0957	0.1615	0.1654	0.0932	0.0944	0.1635	0.1649	0.1681	0.173	0.0112	21.733	0.0502	2989	3327	2693	2943	2686	3465	3359	2584	24.87	22.35	46.75	32.84	67.23
PGAL8A_00020600	1068	492	46.07	PF3D7_0203700	protein MAK16, putative		0.0314	0.1052	0.1281	0.0023	0.1462	0.0256	0.1083	0.1268	0.1135	0.1208	0.1056	0.1086	0.125	0.1456	0.115	0.1184	0.1297	0.1237	0.1118	0.1329	0.1312	0.1274	0.1152	0.1179	0.1217	0.1288	0.1201	0.0208	52.119	0.02118	2971	2909	3143	3154	2801	3316	2859	3017	93.65	94.31	75.96	47.25	73.17
PGAL8A_00020700	1281	609	47.54	PF3D7_0203600	conserved Plasmodium protein, unknown function		0.0607	0.2192	0.3988	0.0152	0.3213	0.0801	0.2265	0.2882	0.195	0.2046	0.2354	0.242	0.2915	0.3277	0.2041	0.2142	0.3806	0.2833	0.29	0.3807	0.4051	0.2904	0.2968	0.2589	0.2618	0.2951	0.308	0.0117	11.09	0.04578	1622	1197	806	588	1033	1119	1124	1124	36.35	23.82	37.79	43.83	22.49
PGAL8A_00020900	276	201	72.83	PF3D7_0203400	conserved Plasmodium protein, unknown function		0.0245	0.1129	0.1143	0	0.0823	0.0003	0.1132	0.0822	0.1414	0.1189	0.131	0.132	0.0725	0.0726	0.1487	0.1406	0.1138	0.1071	0.1057	0.1139	0.1143	0.1074	0.106	0.1296	0.1323	0.128	0.1319	0.0189	86.474	0.02454	3297	2787	3326	3943	3627	4251	2788	3597	43.02	35.46	93.25	87.33	97.96
PGAL8A_00021000	681	513	75.33	PF3D7_0203300	ERCC1 nucleotide excision repair protein, putative	RAD10	0.0256	0.0883	0.1064	0.0023	0.1063	0.0186	0.0915	0.1069	0.1312	0.128	0.0867	0.0891	0.0957	0.0953	0.1183	0.1164	0.1142	0.1335	0.1396	0.1157	0.1079	0.1347	0.1399	0.118	0.1193	0.1145	0.1165	0.0295	9.772	0.02478	3255	3224	3418	3154	3329	3621	3169	3284	35.45	34.33	41.32	47.2	71.28
PGAL8A_00021100	1491	402	26.96	PF3D7_0203200	conserved Plasmodium protein, unknown function		0.0817	0.2882	0.4984	0.0087	0.3902	0.0561	0.2813	0.4145	0.3487	0.3935	0.2775	0.2739	0.3382	0.3311	0.3248	0.344	0.4637	0.3959	0.3679	0.4607	0.4923	0.3794	0.363	0.4206	0.3803	0.4009	0.3717	0.1049	13.807	0.0933	920	621	451	1461	655	1913	672	466	57.66	49.95	26.12	36.85	29.8
PGAL8A_00021300	4878	1185	24.29	PF3D7_0203000	repetitive organellar protein, putative		0.0976	0.3986	0.4809	0.0042	0.4089	0.1229	0.3982	0.3843	0.4198	0.4168	0.3807	0.3864	0.4061	0.4236	0.4253	0.4328	0.4513	0.4983	0.5037	0.4475	0.4796	0.4936	0.5007	0.4766	0.4556	0.5408	0.5176	0.0583	21.743	0.07902	558	239	496	2591	564	396	239	566	39.59	26.69	57.78	72.53	36.85
PGAL8A_00021500	363	261	71.9	PF3D7_0202800	conserved Plasmodium protein, unknown function		0.1436	0.3175	0.371	0.0188	0.3778	0.0259	0.3461	0.3903	0.2651	0.2578	0.2886	0.3144	0.4509	0.4573	0.2485	0.2589	0.3683	0.3257	0.3172	0.3787	0.3831	0.3487	0.34	0.3338	0.3054	0.3388	0.3089	0.0432	10.12	0.08556	164	480	961	346	717	3307	375	548	43.97	5.33	46.37	51.91	65.41
PGAL8A_00021600	1515	1128	74.46	PF3D7_0202700	octaprenyl pyrophosphate synthase	PSY	0.0872	0.1955	0.1643	0.0031	0.1804	0.0464	0.1933	0.1855	0.2034	0.2023	0.1597	0.1575	0.153	0.1523	0.1752	0.1726	0.1725	0.1857	0.1847	0.1708	0.1627	0.1836	0.1823	0.1662	0.162	0.1598	0.1559	0.0194	13.267	0.05798	777	1467	2742	2910	2383	2318	1496	2231	21.91	35.87	45.58	54.11	41.2
PGAL8A_00022500	645	591	91.63	PF3D7_0514600	ribose-5-phosphate isomerase, putative		0.0426	0.0839	0.1192	0.0001	0.109	0.061	0.0836	0.1258	0.1254	0.122	0.082	0.0818	0.1209	0.1094	0.1158	0.1174	0.1183	0.1553	0.1573	0.1182	0.1192	0.1547	0.1567	0.1709	0.1725	0.1448	0.1482	0.0188	10.296	0.0351	2438	3315	3256	3612	3300	1717	3316	3030	87.95	91.03	79.44	79.47	89.75
PGAL8A_00022800	1182	948	80.2	PF3D7_0501500	rhoptry-associated protein 3		0.4378	0.6025	0.446	0.0146	0.5695	0.077	0.5924	0.5688	0.7659	0.7694	0.6911	0.6797	0.6745	0.6992	0.8065	0.8489	0.4333	0.7157	0.7481	0.4496	0.467	0.7111	0.7378	0.6959	0.7056	0.6886	0.6882	0.1434	613.557	0.13938	9	46	604	641	206	1200	47	163	42.41	6.63	82.48	94.53	11.9
PGAL8A_00022900	1956	1401	71.63	PF3D7_0501700	anaphase promoting complex subunit, putative		0.0881	0.3036	0.2949	0.0091	0.2941	0.0639	0.2988	0.311	0.2712	0.2671	0.2909	0.2907	0.2888	0.2793	0.2702	0.2658	0.3035	0.3009	0.2895	0.3002	0.29	0.3064	0.2916	0.2906	0.2658	0.2877	0.2634	0.0274	9.258	0.12332	758	545	1478	1374	1220	1609	565	975	27.97	3.72	8.95	21.79	13.67
PGAL8A_00023000	3102	1641	52.9	PF3D7_0501800	chromosome assembly factor 1		0.0399	0.1018	0.1274	0.0036	0.1235	0.0342	0.1021	0.1294	0.1321	0.1293	0.1052	0.1056	0.1228	0.1217	0.1316	0.1312	0.1289	0.1498	0.1474	0.1294	0.1287	0.1528	0.1504	0.1347	0.1312	0.1254	0.1272	0.0166	153.85	0.04734	2546	2983	3154	2762	3114	2895	2976	2980	25.98	49.3	75.8	63.96	33.17
PGAL8A_00023100	1143	549	48.03	PF3D7_0501900	conserved protein, unknown function		0.0639	0.2279	0.299	0.0042	0.2011	0.0575	0.2379	0.1763	0.2264	0.2222	0.2178	0.2262	0.1984	0.2004	0.2099	0.2215	0.2976	0.2585	0.2592	0.309	0.3098	0.2625	0.2652	0.2568	0.2501	0.2418	0.2443	0.0297	30.359	0.09236	1497	1100	1443	2591	2147	1852	1002	2358	46.41	43.79	43.24	46.98	63.8
PGAL8A_00023200	3156	1623	51.43	PF3D7_0502000	vacuolar protein sorting-associated protein 11, putative		0.0708	0.2089	0.2411	0.0088	0.2002	0.0363	0.2108	0.1988	0.2457	0.2418	0.2037	0.2045	0.2049	0.212	0.251	0.2438	0.2409	0.2664	0.261	0.2408	0.2432	0.2647	0.2593	0.2236	0.2194	0.2199	0.2186	0.0211	10.753	0.1101	1234	1308	1947	1438	2157	2791	1294	2058	61.23	58.14	43.36	41.92	36.56
PGAL8A_00023300	1176	273	23.21	PF3D7_0502100	HCNGP-like protein		0.0624	0.2426	0.2364	0.0128	0.1954	0.0494	0.2701	0.2143	0.1981	0.191	0.2142	0.2384	0.1829	0.184	0.1901	0.1816	0.2412	0.2535	0.2532	0.2644	0.2611	0.2834	0.282	0.228	0.2302	0.2192	0.223	0.0176	103.736	0.09924	1550	956	1994	811	2210	2181	747	1887	44.04	41.09	39.31	53.88	56.57
PGAL8A_00023400	1266	639	50.47	PF3D7_0502200	protein Mpv17, putative		0.0942	0.1271	0.1081	0.004	0.1353	0.0329	0.1327	0.1472	0.1908	0.1908	0.1266	0.1275	0.1562	0.1461	0.2002	0.2014	0.1187	0.1603	0.1666	0.1197	0.1091	0.1612	0.1614	0.1702	0.1719	0.1672	0.1684	0.008	26.763	0.10374	622	2542	3396	2658	2948	2971	2456	2723	62.9	62.82	58.08	55.55	57.07
PGAL8A_00023500	570	258	45.26	PF3D7_0502300	conserved Plasmodium protein, unknown function		0.2683	0.5242	0.3202	0.0001	0.612	0.0323	0.5261	0.6168	0.5966	0.5275	0.4566	0.4584	0.4995	0.5182	0.495	0.452	0.3051	0.3322	0.3389	0.3068	0.3217	0.3328	0.3391	0.3001	0.2791	0.2859	0.264	0.0459	0.911	0.0607	25	82	1267	3612	168	3007	80	123	31.08	6.9	8.55	19.57	66.59
PGAL8A_00023600	1548	534	34.5	PF3D7_0502400	merozoite surface protein 8 // ring-stage membrane protein 1	RMP1	0.5885	0.8555	0.3954	0.0063	0.8626	0.0705	0.814	0.9078	1.0007	1.0316	0.487	0.4722	0.572	0.5672	0.5761	0.6165	0.3732	0.5049	0.5078	0.3557	0.3782	0.496	0.5005	0.5277	0.5241	0.5245	0.5263	0.0755	0.518	0.1238	3	9	828	1967	36	1399	12	22	94.03	71.46	36.71	26.87	67.47
PGAL8A_00023800	2424	1026	42.33	PF3D7_0502600	conserved Plasmodium protein, unknown function		0.1017	0.3156	0.403	0.0116	0.353	0.0885	0.3127	0.3386	0.3206	0.3189	0.3416	0.333	0.3452	0.3355	0.3331	0.3422	0.3627	0.4049	0.4072	0.362	0.3989	0.396	0.3956	0.3696	0.3801	0.3771	0.3876	0.0433	5.319	0.13686	498	488	789	954	828	922	504	794	34.78	42.73	26.43	20.55	26.38
PGAL8A_00023900	1008	663	65.77	PF3D7_0502700	conserved Plasmodium protein, unknown function		0.0559	0.1771	0.2437	0.0018	0.1718	0.0515	0.1742	0.1603	0.1685	0.1617	0.1763	0.1733	0.169	0.1761	0.1729	0.1713	0.2424	0.2274	0.218	0.2388	0.24	0.2241	0.2148	0.2134	0.1916	0.2127	0.188	0.0189	4.058	0.08746	1831	1738	1913	3312	2508	2092	1790	2574	35.96	40.73	26.47	13.05	13.31
PGAL8A_00024000	417	306	73.38	PF3D7_0502800	DnaJ protein, putative		0.0333	0.1506	0.221	0.0001	0.2142	0.0418	0.1486	0.1895	0.1471	0.1292	0.1675	0.1652	0.1811	0.1944	0.1548	0.1346	0.2253	0.1747	0.1511	0.2229	0.2194	0.1698	0.1496	0.2197	0.2181	0.2157	0.1966	0.0256	3.377	0.03126	2875	2163	2141	3612	2004	2519	2187	2177	62.11	48.1	15.35	5.14	18.76
PGAL8A_00024100	249	228	91.57	PF3D7_0502900	Tim10/DDP family zinc finger protein, putative		0.0054	0.0227	0.0368	0	0.0203	0.0123	0.0226	0.0242	0.0644	0.0707	0.0162	0.016	0.0282	0.0252	0.0562	0.0639	0.0338	0.0701	0.0785	0.0339	0.037	0.0697	0.0779	0.0745	0.0719	0.0877	0.0768	0.0159	19.208	0.00916	4115	4127	4059	3943	4186	3875	4132	4164	73.6	91.07	91.8	89.15	97.23
PGAL8A_00024200	753	534	70.92	PF3D7_0503000	50S ribosomal protein L28, apicoplast, putative		0.0417	0.1803	0.2496	0.0097	0.1772	0.0151	0.1697	0.1784	0.1931	0.1894	0.193	0.182	0.2051	0.2081	0.2135	0.2097	0.2449	0.2324	0.2367	0.2359	0.2404	0.2201	0.2266	0.1863	0.1732	0.1887	0.1685	0.0327	41.255	0.14302	2473	1690	1855	1251	2423	3777	1849	2328	52.38	76.75	91.52	88.38	93.2
PGAL8A_00024300	1494	813	54.42	PF3D7_0503100	4-diphosphocytidyl-2-C-methyl-D-erythritol kinase, putative		0.1007	0.2569	0.3701	0.0218	0.3449	0.084	0.264	0.3186	0.2628	0.2661	0.2724	0.2795	0.3418	0.372	0.2846	0.2739	0.3388	0.2756	0.2645	0.3558	0.3904	0.2905	0.2791	0.2946	0.2958	0.3075	0.3141	0.047	9.736	0.16758	513	846	969	217	882	1013	791	917	39.05	46.1	44.64	44.35	17.19
PGAL8A_00024400	2613	1479	56.6	PF3D7_0503200	conserved Plasmodium protein, unknown function		0.0617	0.1286	0.1401	0.0087	0.1295	0.0442	0.1297	0.1293	0.1508	0.1518	0.1292	0.1272	0.1347	0.1389	0.1521	0.1504	0.1372	0.1538	0.1512	0.1439	0.145	0.1547	0.1519	0.1567	0.1546	0.1511	0.1501	0.0149	62.763	0.0384	1575	2512	3015	1461	3038	2414	2498	2983	35.78	47.1	50.1	49.89	25.74
PGAL8A_00024600	942	414	43.95	PF3D7_0503300	serine/arginine-rich splicing factor 12		0.0027	0.0645	0.0942	0	0.0588	0.0279	0.0643	0.0799	0.1473	0.1616	0.0682	0.068	0.076	0.0552	0.1476	0.1619	0.1035	0.1577	0.1733	0.1039	0.0944	0.1578	0.1735	0.1686	0.1672	0.1599	0.1655	0.0224	597.057	0.01678	4194	3633	3560	3943	3857	3213	3637	3630	90.51	93.75	88	76.09	64.4
PGAL8A_00024700	369	330	89.43	PF3D7_0503400	actin-depolymerizing factor 1	PfADF1	0.0182	0.0724	0.0482	0	0.0427	0.0162	0.0726	0.06	0.0664	0.0672	0.0708	0.0709	0.0664	0.049	0.0744	0.0752	0.0509	0.0671	0.0684	0.0509	0.0481	0.0672	0.0685	0.0619	0.0541	0.0583	0.0502	0.0119	33.278	0.02564	3598	3490	3973	3943	4015	3716	3498	3847	80.02	92.38	98.98	98.7	98.72
PGAL8A_00024800	2391	1164	48.68	PF3D7_0503500	protein kinase, putative		0.0597	0.2126	0.3827	0.0123	0.3095	0.0745	0.215	0.2824	0.259	0.253	0.199	0.2017	0.2568	0.2853	0.2401	0.233	0.3526	0.2792	0.2813	0.354	0.3824	0.2845	0.2842	0.3291	0.3232	0.3567	0.3583	0.0455	23.109	0.07334	1670	1265	894	866	1115	1269	1246	1174	30.05	40.25	24.6	38.5	21.41
PGAL8A_00024900	2397	2085	86.98	PF3D7_0503600	myosin B	PfmyoB	0.0516	0.1138	0.12	0.0035	0.1219	0.0291	0.116	0.1179	0.1748	0.1698	0.1206	0.1214	0.1157	0.1209	0.169	0.1681	0.1204	0.159	0.1485	0.1217	0.1231	0.1594	0.1475	0.1753	0.1731	0.1738	0.169	0.0202	14.581	0.03908	2018	2771	3246	2791	3138	3156	2741	3154	43.73	21.78	49.97	62.14	11.9
PGAL8A_00025000	360	303	84.17	PF3D7_0503800	60S ribosomal protein L31		0.0116	0.0156	0.0514	0	0.0414	0.0086	0.0156	0.032	0.042	0.0412	0.0278	0.0281	0.0459	0.0548	0.0497	0.0535	0.0415	0.0505	0.0509	0.0412	0.0511	0.0508	0.0498	0.0408	0.0417	0.0506	0.0524	0.0082	501.727	0.01922	3896	4193	3953	3943	4025	4012	4192	4103	92.18	97.21	95.66	89.3	96.14
PGAL8A_00025100	1614	1089	67.47	PF3D7_0503900	conserved Plasmodium protein, unknown function		0.0351	0.1346	0.2099	0.0031	0.1926	0.0445	0.1384	0.1723	0.1661	0.1657	0.1305	0.1309	0.1704	0.1821	0.151	0.1444	0.1949	0.1897	0.1872	0.1928	0.2056	0.1897	0.187	0.2007	0.1837	0.2165	0.2024	0.0294	16.688	0.04128	2797	2417	2250	2910	2244	2398	2369	2413	7.06	37.2	21.9	28.41	19.58
PGAL8A_00025200	5766	3072	53.28	PF3D7_0504000	cation transporting P-ATPase		0.0277	0.1026	0.1543	0.0042	0.1501	0.0325	0.1025	0.1433	0.1442	0.1488	0.1008	0.1024	0.1415	0.1454	0.1444	0.1486	0.1524	0.1572	0.159	0.1513	0.1529	0.1575	0.1608	0.1865	0.191	0.2006	0.2057	0.0317	59.189	0.02666	3139	2963	2866	2591	2764	2995	2963	2796	40.71	75.42	66.68	57.09	14.32
PGAL8A_00025300	438	306	69.86	PF3D7_0504100	AN1-type zinc finger protein, putative		0.0353	0.1517	0.281	0	0.2456	0.0391	0.1511	0.2534	0.2653	0.2492	0.1504	0.1498	0.2463	0.2367	0.2426	0.2274	0.2923	0.2483	0.2432	0.2919	0.2806	0.2473	0.2423	0.2675	0.2705	0.2756	0.2616	0.0081	17.403	0.069	2775	2145	1577	3943	1656	2646	2141	1461	15.23	37.96	57.73	74.49	63.82
PGAL8A_00025400	1437	1119	77.87	PF3D7_0504200	ATP-dependent RNA helicase DDX27, putative		0.0556	0.1912	0.3275	0.0062	0.2815	0.0425	0.1921	0.2644	0.1667	0.1678	0.2252	0.2261	0.291	0.304	0.1822	0.1864	0.3219	0.2066	0.2018	0.3276	0.3288	0.2094	0.2051	0.2514	0.248	0.2722	0.2695	0.0174	20.556	0.06802	1847	1521	1214	2001	1314	2494	1518	1349	29.39	63.29	73.08	94.51	88.18
PGAL8A_00025500	678	312	46.02	PF3D7_0504300	conserved Plasmodium protein, unknown function		0.0539	0.3747	0.5249	0.0172	0.2412	0.0554	0.3706	0.2389	0.1848	0.1937	0.3937	0.3745	0.2377	0.2375	0.204	0.2231	0.4639	0.427	0.4278	0.4623	0.5212	0.4347	0.4377	0.2732	0.2732	0.2566	0.2549	0.0099	9.618	0.2857	1917	293	378	433	1724	1941	305	1612	21.14	9.47	21.36	16.15	71.11
PGAL8A_00025600	2166	1731	79.92	PF3D7_0504400	ATP-dependent helicase, putative		0.0511	0.1126	0.156	0.0131	0.1655	0.0241	0.1166	0.1619	0.1607	0.1659	0.1178	0.1212	0.169	0.1742	0.166	0.1725	0.1485	0.1432	0.1481	0.1536	0.1566	0.1451	0.1501	0.1913	0.1964	0.2011	0.2052	0.0209	43.102	0.0358	2038	2793	2850	781	2580	3384	2729	2555	27.79	41.65	74.49	60.55	24.81
PGAL8A_00025700	828	636	76.81	PF3D7_0504500	MOLO1 domain-containing protein, putative		0.059	0.1811	0.2486	0.0076	0.2021	0.0404	0.1751	0.192	0.2404	0.2128	0.155	0.1534	0.1891	0.1939	0.2118	0.2052	0.2463	0.2636	0.2478	0.2366	0.2381	0.2563	0.238	0.3013	0.2766	0.3086	0.2879	0.0387	38.963	0.08446	1695	1678	1866	1690	2136	2588	1771	2147	9.59	7.38	19.02	36.58	95.14
PGAL8A_00025800	1116	1005	90.05	PF3D7_0504600	2-oxoisovalerate dehydrogenase subunit beta, mitochondrial, putative	BCKDH-E1b	0.0263	0.0584	0.0624	0.0024	0.0486	0.0066	0.0612	0.0434	0.0576	0.0546	0.066	0.0688	0.0453	0.0513	0.0574	0.0558	0.06	0.0664	0.0606	0.0627	0.0651	0.0692	0.0634	0.0562	0.0554	0.0617	0.0581	0.0128	462.556	0.01692	3221	3726	3851	3128	3962	4074	3685	4012	48.69	24.8	85.88	92.45	84.3
PGAL8A_00025900	6915	525	7.59	PF3D7_0504700	centrosomal protein CEP120, putative		0.0433	1.4987	1.717	0.0366	0.4249	0.1173	1.4683	0.358	0.309	0.3146	1.5105	1.4936	0.3837	0.4579	0.3029	0.3255	14.713	19.1999	1.491	1.7354	14.1078	19.0592	1.5765	0.4105	0.4362	0.4236	0.4277	0.0541	121.019	0.10908	2397	2	3	34	507	458	2	687	20.95	19.63	17.83	12.36	34.26
PGAL8A_00026000	14697	5076	34.54	PF3D7_0504800	conserved Plasmodium protein, unknown function		0.0871	0.2768	0.5403	0.019	0.4902	0.1376	0.2766	0.4295	0.34	0.366	0.2814	0.2813	0.4281	0.4859	0.3539	0.3712	0.4952	0.4025	0.4114	0.4888	0.5353	0.4032	0.4107	0.528	0.5475	0.5941	0.6065	0.0735	89.393	0.111	778	702	345	338	348	255	704	427	27.73	16.44	53.49	57.5	30.88
PGAL8A_00026100	519	432	83.24	PF3D7_0504900	conserved protein, unknown function		0.0211	0.1093	0.1009	0	0.0763	0.0438	0.1093	0.0945	0.1443	0.154	0.1227	0.1225	0.0959	0.0882	0.1449	0.1488	0.1133	0.1712	0.19	0.1145	0.1013	0.1712	0.1898	0.1719	0.1784	0.1599	0.1834	0.051	40.59	0.05498	3458	2838	3485	3943	3691	2439	2845	3443	68.24	50.55	93.34	90.36	98.96
PGAL8A_00026200	7251	2646	36.49	PF3D7_0505000	conserved Plasmodium membrane protein, unknown function		0.0824	0.3117	0.5588	0.0174	0.5056	0.127	0.3062	0.4672	0.3632	0.3689	0.2996	0.2907	0.4614	0.5054	0.357	0.3713	0.5124	0.4051	0.4163	0.5007	0.541	0.4036	0.4114	0.559	0.5545	0.6287	0.6248	0.057	18.349	0.12592	899	505	315	421	320	351	535	320	65.55	79.38	31.85	26.09	37.42
PGAL8A_00026300	6903	3591	52.02	PF3D7_0505100	trafficking protein particle complex subunit 8, putative		0.0609	0.1967	0.3999	0.0188	0.3227	0.0966	0.1949	0.3013	0.2636	0.2702	0.1991	0.1974	0.3123	0.3409	0.2635	0.2731	0.3694	0.313	0.311	0.3666	0.398	0.3137	0.3125	0.4199	0.4338	0.4454	0.4589	0.054	36.27	0.08688	1616	1455	799	346	1024	755	1470	1038	62.54	71.53	64.58	74.07	37.16
PGAL8A_00026400	1818	1272	69.97	PF3D7_0505200	actin-like protein, putative		0.0535	0.1535	0.1928	0.0064	0.1618	0.0508	0.1532	0.1547	0.1755	0.1625	0.1558	0.1553	0.1587	0.1709	0.1768	0.168	0.1783	0.2009	0.1925	0.1786	0.193	0.202	0.1939	0.1729	0.1623	0.176	0.1627	0.0272	12.401	0.03426	1937	2117	2419	1943	2630	2123	2113	2638	45.87	55.62	49.82	63.54	23.47
PGAL8A_00026500	1587	342	21.55	PF3D7_0505300	UDP-N-acetylglucosamine transporter, putative		0.1321	0.3819	0.5023	0.0144	0.5199	0.1419	0.3973	0.6005	0.4922	0.5215	0.4043	0.4185	0.6343	0.5207	0.51	0.5196	0.5114	0.5088	0.495	0.506	0.4979	0.5097	0.4955	0.5337	0.5156	0.4919	0.5119	0.0359	4.521	0.09062	210	273	440	659	296	217	241	133	9.35	3.62	17.25	26.44	12.34
PGAL8A_00026600	2082	1182	56.77	PF3D7_0505400	conserved Plasmodium protein, unknown function		0.0599	0.1164	0.2062	0.0059	0.1963	0.0751	0.1186	0.1672	0.1739	0.171	0.1099	0.1119	0.1685	0.2042	0.1824	0.1813	0.1793	0.176	0.1794	0.1801	0.2074	0.1782	0.1815	0.2376	0.2259	0.2569	0.2468	0.0241	98.78	0.03928	1659	2732	2296	2068	2203	1255	2698	2480	25.19	41.6	64.6	73.62	23.16
PGAL8A_00026700	3693	2931	79.37	PF3D7_0505500	DNA mismatch repair protein MSH6, putative		0.0203	0.0714	0.0963	0.0036	0.0907	0.0264	0.0712	0.0863	0.0733	0.0749	0.0689	0.0683	0.0814	0.0894	0.0753	0.077	0.0883	0.0856	0.0836	0.0883	0.0969	0.0839	0.082	0.0897	0.0903	0.099	0.0997	0.008	104.803	0.01586	3511	3513	3545	2762	3508	3286	3524	3541	40.68	52.9	83.97	76.58	35.19
PGAL8A_00026800	810	552	68.15	PF3D7_0505600	conserved Plasmodium protein, unknown function		0.0302	0.2031	0.2793	0.0206	0.2179	0.0351	0.2047	0.2187	0.1424	0.1499	0.2216	0.215	0.2235	0.2183	0.1434	0.1545	0.2721	0.1957	0.2069	0.2702	0.2818	0.1952	0.199	0.1736	0.1681	0.1845	0.1842	0.0201	26.076	0.0312	3036	1368	1589	271	1957	2858	1350	1831	59.04	54.7	51.96	47.08	63.75
PGAL8A_00026900	303	243	80.2	PF3D7_0505800	small ubiquitin-related modifier	PfSUMO	0.0048	0.0256	0.0163	0	0.0212	0.0006	0.0259	0.021	0.0312	0.0305	0.0199	0.0201	0.0154	0.0165	0.0253	0.0247	0.0156	0.0151	0.0145	0.0157	0.0163	0.0146	0.0154	0.0104	0.0137	0.0143	0.0112	0.0005	88.738	0.0017	4138	4096	4213	3943	4179	4224	4097	4188	98.74	97.82	98.49	97.97	99.1
PGAL8A_00027000	381	297	77.95	PF3D7_0505900	conserved Plasmodium protein, unknown function		0.0566	0.177	0.2603	0.0045	0.1837	0.0169	0.1827	0.1507	0.1982	0.1862	0.1787	0.1845	0.214	0.2312	0.1851	0.1734	0.2426	0.2721	0.2665	0.2328	0.2495	0.2607	0.2556	0.1899	0.203	0.1763	0.1895	0.009	23.282	0.03288	1795	1743	1772	2491	2355	3681	1645	2682	77.64	83.47	90.95	80.32	96.81
PGAL8A_00027100	598	204	34.11	PF3D7_0506000	conserved Plasmodium protein, unknown function		0.0853	0.3454	0.6694	0.0113	0.9647	0.0809	0.3464	0.7289	0.5583	0.5611	0.3369	0.3389	0.7142	0.9122	0.5656	0.5707	0.5903	0.5725	0.5752	0.5916	0.6665	0.5646	0.5701	0.7746	0.7629	0.7874	0.7811	0.0002	15.878	0.15628	826	380	169	995	21	1092	373	60	77.45	68.84	51.41	58.47	77.45
PGAL8A_00027200	606	516	85.15	PF3D7_0506100	60S ribosomal subunit protein L24, putative		0.0338	0.1397	0.2242	0.0092	0.2095	0.0464	0.1526	0.1967	0.1639	0.1657	0.1426	0.1543	0.1882	0.2121	0.1607	0.1675	0.2405	0.1929	0.1863	0.2517	0.2404	0.1907	0.1855	0.2136	0.2127	0.2277	0.2258	0.0169	31.92	0.0434	2863	2351	2109	1357	2062	2318	2120	2084	76.39	77.72	57.81	28.04	78.09
PGAL8A_00027300	741	492	66.4	PF3D7_0506200	TATA-box-binding protein		0.0198	0.083	0.1482	0.0024	0.1113	0.0406	0.0865	0.1244	0.103	0.098	0.0808	0.0842	0.1361	0.119	0.1036	0.102	0.1547	0.134	0.1352	0.1535	0.1468	0.1324	0.1336	0.1382	0.1362	0.134	0.137	0.0206	21.179	0.0191	3532	3327	2930	3128	3274	2575	3259	3050	57.76	50.5	31.35	28.6	60.27
PGAL8A_00027400	954	519	54.4	PF3D7_0506300	conserved Plasmodium protein, unknown function		0.0471	0.2041	0.3449	0.0092	0.3602	0.1093	0.2037	0.3181	0.1899	0.1789	0.1787	0.1782	0.3022	0.319	0.1834	0.1742	0.3177	0.251	0.2466	0.3147	0.3432	0.2602	0.2554	0.2829	0.2791	0.3278	0.3209	0.0174	15.082	0.05176	2226	1355	1105	1357	797	579	1364	921	39.79	49.85	42.31	43.14	15.11
PGAL8A_00027500	342	243	71.05	PF3D7_0506400	conserved Plasmodium protein, unknown function		0.1173	0.3563	0.5015	0.0104	0.5048	0.1336	0.3751	0.5106	0.4928	0.5536	0.3326	0.3519	0.4794	0.55	0.5013	0.5025	0.533	0.4394	0.4846	0.555	0.5231	0.4363	0.4789	0.4804	0.5635	0.4829	0.5282	0.0612	15.71	0.20218	330	343	442	1124	322	293	291	237	23.61	1.22	18.28	21.46	81.03
PGAL8A_00027600	10479	1842	17.58	PF3D7_0506500	conserved Plasmodium protein, unknown function		0.1165	0.4958	0.7388	0.0217	0.6932	0.1326	0.5103	0.6691	0.5307	0.5411	0.4935	0.4985	0.6403	0.6498	0.5345	0.5489	0.7403	0.5894	0.6021	0.7164	0.7214	0.5883	0.5849	0.7058	0.6994	0.7212	0.7176	0.0787	88.174	0.13548	341	98	113	219	99	301	90	88	28.28	60.88	37.15	44.52	30.07
PGAL8A_00027700	1329	405	30.47	PF3D7_0506600	histone deacetylase, putative, pseudogene		0.0675	0.3186	0.3916	0.0383	0.2687	0.0573	0.295	0.2717	0.1695	0.1645	0.2798	0.2608	0.2781	0.2762	0.1518	0.1469	0.3869	0.2813	0.2778	0.3765	0.378	0.2608	0.2569	0.2396	0.2525	0.2472	0.261	0.0147	18.513	0.1525	1335	471	845	27	1431	1862	588	1282	12.97	20.03	13.28	29.98	24.46
PGAL8A_00027800	1638	993	60.62	PF3D7_0506700	GTPase-activating protein, putative		0.0623	0.2144	0.3705	0.0168	0.3458	0.076	0.211	0.3322	0.2189	0.216	0.2126	0.2142	0.32	0.3271	0.2097	0.2138	0.3713	0.2725	0.257	0.3837	0.3781	0.2775	0.267	0.357	0.353	0.3651	0.3729	0.0211	9.365	0.06202	1555	1240	965	464	874	1230	1289	827	72.82	86.58	90.31	95.98	52.59
PGAL8A_00027900	2205	1335	60.54	PF3D7_0506800	transcription factor 25, putative		0.0353	0.1387	0.2211	0.0097	0.2073	0.0596	0.1415	0.1791	0.1821	0.1904	0.1383	0.1411	0.1685	0.202	0.1679	0.1757	0.1921	0.1755	0.1757	0.1995	0.2286	0.1792	0.1815	0.1948	0.1933	0.2179	0.2204	0.0171	22.665	0.04576	2775	2369	2138	1251	2085	1781	2317	2318	86.84	76.72	68.29	67.27	43.92
PGAL8A_00028000	1692	1206	71.28	PF3D7_0506900	rhomboid protease ROM4		0.0546	0.1048	0.1059	0.009	0.1216	0.0488	0.0988	0.1328	0.1309	0.1308	0.1053	0.0991	0.1106	0.1058	0.1293	0.1325	0.108	0.1084	0.1114	0.1042	0.1024	0.1126	0.1136	0.1096	0.1132	0.116	0.1206	0.0187	19.634	0.03732	1888	2916	3429	1400	3141	2210	3048	2932	68.31	39.03	91.88	94.98	69.93
PGAL8A_00028100	318	300	94.34	PF3D7_0507000	conserved Plasmodium protein, unknown function		0.0297	0.1866	0.3705	0	0.252	0.0577	0.1846	0.2424	0.211	0.222	0.189	0.1883	0.2497	0.2683	0.2474	0.2578	0.3979	0.2817	0.2841	0.3976	0.3703	0.2812	0.2838	0.316	0.3525	0.3312	0.3781	0.0625	9.796	0.0405	3052	1591	965	3943	1594	1842	1616	1574	72.89	38.29	24.96	38.58	85.74
PGAL8A_00028200	1260	1023	81.19	PF3D7_0507100	60S ribosomal protein L4		0.0174	0.0579	0.0774	0.0035	0.0985	0.038	0.0605	0.0829	0.0809	0.0856	0.0445	0.0471	0.0747	0.0896	0.0714	0.0751	0.0717	0.0662	0.0704	0.0702	0.0757	0.0675	0.0719	0.0815	0.0922	0.0919	0.0966	0.0131	4682.87	0.03412	3633	3733	3737	2791	3425	2705	3694	3587	98.84	99.1	98.3	97.46	83.68
PGAL8A_00028300	1644	861	52.37	PF3D7_0507200	subtilisin-like protease 3	PfSUB3	0.1143	0.227	0.4175	0.0096	0.4556	0.1216	0.2303	0.3776	0.382	0.385	0.254	0.2542	0.3948	0.4634	0.4104	0.3861	0.3482	0.4132	0.3992	0.3554	0.431	0.4031	0.3903	0.5031	0.535	0.5334	0.5582	0.087	17.077	0.04818	357	1111	723	1279	420	412	1076	593	49.43	43.33	65.22	79.71	47.43
PGAL8A_00028400	2805	828	29.52	PF3D7_0507300	conserved Plasmodium protein, unknown function		0.1763	0.5492	0.8397	0.034	0.6217	0.1922	0.5457	0.5523	0.5439	0.5824	0.5505	0.5513	0.5755	0.651	0.5651	0.6044	0.7775	0.954	0.9406	0.8143	0.8892	0.94	0.9453	0.8884	0.8815	0.9672	0.973	0.0964	0.681	0.28598	89	65	61	48	157	51	71	185	28.27	11.61	27.18	55.41	6.02
PGAL8A_00028500	468	234	50	PF3D7_0507400	conserved Plasmodium protein, unknown function		0.121	0.4294	0.5365	0.0099	0.4765	0.1245	0.4437	0.4038	0.4692	0.4689	0.3955	0.4082	0.3626	0.4568	0.5179	0.5085	0.475	0.6461	0.6299	0.4882	0.5603	0.6285	0.6126	0.4696	0.4601	0.4681	0.4721	0.0508	6.555	0.24922	297	177	357	1208	378	378	157	500	25.93	4.33	56.4	87.55	35.16
PGAL8A_00028600	1818	1104	60.73	PF3D7_0507500	subtilisin-like protease 1	PfSUB1	0.0553	0.1578	0.2281	0.0097	0.2033	0.0651	0.1582	0.1858	0.2268	0.2276	0.1753	0.1746	0.2031	0.2187	0.2317	0.2381	0.2006	0.2305	0.2274	0.2003	0.2281	0.2355	0.2325	0.2107	0.2133	0.2324	0.2375	0.0198	24.664	0.03298	1861	2033	2073	1251	2116	1569	2037	2225	51.36	39	71.32	83.28	22.19
PGAL8A_00028700	1626	762	46.86	PF3D7_0507600	cell differentiation protein, putative		0.0017	0.023	0.0368	0.0016	0.0329	0.0088	0.0209	0.0368	0.0251	0.0215	0.0248	0.0228	0.0389	0.0351	0.027	0.0233	0.0407	0.0419	0.038	0.0386	0.0346	0.0397	0.0359	0.0475	0.0433	0.0446	0.0403	0.0032	51.171	0.00598	4226	4122	4059	3361	4095	4007	4148	4063	75.7	81.25	82.53	73.97	58.14
PGAL8A_00028800	1473	1200	81.47	PF3D7_0507700	nuclear protein localization protein 4, putative	NPLOC4	0.0267	0.1111	0.1569	0.0068	0.1462	0.041	0.112	0.1534	0.1507	0.1633	0.1134	0.1124	0.1647	0.1582	0.1493	0.1601	0.1603	0.1468	0.1488	0.164	0.1623	0.1487	0.1505	0.1997	0.2073	0.209	0.2223	0.0277	81.046	0.03146	3198	2812	2833	1864	2801	2562	2802	2648	79.95	76.04	77.27	68.1	55.48
PGAL8A_00028900	4128	1350	32.7	PF3D7_0507800	conserved Plasmodium protein, unknown function		0.0377	0.134	0.203	0.009	0.1932	0.0638	0.1386	0.171	0.1759	0.1746	0.1385	0.1452	0.1692	0.1831	0.171	0.1698	0.1819	0.1945	0.1922	0.1822	0.2064	0.1977	0.1954	0.1917	0.2005	0.2119	0.2129	0.0346	55.08	0.02734	2650	2432	2329	1400	2235	1616	2366	2433	87.83	87.83	69.85	70.38	48.05
PGAL8A_00029000	351	243	69.23	PF3D7_0507900	conserved Plasmodium protein, unknown function		0.0583	0.2279	0.3569	0.0126	0.3942	0.0704	0.2108	0.4119	0.3635	0.3563	0.2172	0.2148	0.4113	0.4427	0.3282	0.3221	0.3668	0.4011	0.3886	0.3764	0.3634	0.4055	0.3924	0.4828	0.5025	0.4826	0.4981	0.0288	30.771	0.2366	1713	1100	1041	835	633	1404	1294	474	86.1	76.13	62.23	49.2	83.11
PGAL8A_00029100	855	711	83.16	PF3D7_0508000	6-cysteine protein	Pf38	0.5595	0.7926	0.3622	0.0199	0.8589	0.1183	0.7784	0.7876	0.8718	0.8007	0.3947	0.3969	0.4823	0.4749	0.5028	0.4831	0.3857	0.4085	0.4241	0.3819	0.3483	0.4004	0.4154	0.4662	0.4604	0.4518	0.4663	0.1074	2.779	0.09696	4	16	1012	300	38	443	15	38	59.02	26.83	90.96	94.41	71.04
PGAL8A_00029200	4839	3060	63.24	PF3D7_0508100	SET domain protein, putative	PfSET9	0.0405	0.1731	0.3557	0.0078	0.3	0.1369	0.1729	0.2969	0.1957	0.188	0.1721	0.1718	0.2991	0.2999	0.1939	0.1871	0.3457	0.2343	0.2329	0.344	0.3562	0.2358	0.2348	0.3211	0.3141	0.3488	0.3414	0.0194	32.625	0.04542	2524	1797	1049	1638	1177	260	1810	1066	37.7	21.12	89.01	93.25	62.54
PGAL8A_00029300	1059	882	83.29	PF3D7_0508200	longevity-assurance (LAG1) protein, putative		0.0301	0.1222	0.2223	0.0114	0.1734	0.0419	0.1211	0.1776	0.1615	0.1689	0.1239	0.1206	0.1943	0.1907	0.1646	0.1811	0.2239	0.1908	0.1878	0.2266	0.2247	0.1963	0.1947	0.2093	0.231	0.2119	0.2253	0.0392	30.768	0.083	3040	2635	2130	982	2485	2515	2646	2337	28.99	29.27	64.65	72.25	93.87
PGAL8A_00029400	1035	813	78.55	PF3D7_0508300	triose phosphate transporter	oTPT	0.0296	0.0884	0.1489	0.003	0.1229	0.0453	0.0852	0.1184	0.1643	0.1626	0.0787	0.0755	0.1298	0.1345	0.1462	0.1504	0.1623	0.1755	0.1817	0.1607	0.1486	0.1786	0.1849	0.184	0.188	0.1933	0.1976	0.0121	74.606	0.02888	3058	3221	2915	2943	3123	2367	3293	3148	82.22	85.2	86.27	77.31	74.88
PGAL8A_00029500	1272	498	39.15	PF3D7_0508400	conserved protein, unknown function		0.0296	0.0715	0.0993	0.0026	0.1065	0.0351	0.0748	0.0985	0.0855	0.0845	0.0646	0.0678	0.1027	0.1071	0.0969	0.0963	0.0986	0.0988	0.0977	0.0985	0.1031	0.1022	0.101	0.116	0.119	0.1067	0.1099	0.0025	50.724	0.03046	3058	3511	3506	3074	3326	2858	3463	3393	52.88	45.96	36.65	67.02	25.57
PGAL8A_00029600	6786	4029	59.37	PF3D7_0508500	guanidine nucleotide exchange factor		0.0534	0.2002	0.3902	0.0181	0.3452	0.1533	0.2042	0.3093	0.2206	0.2205	0.1995	0.2037	0.3076	0.3471	0.2235	0.2196	0.3403	0.2453	0.2406	0.3419	0.3975	0.2463	0.2419	0.3703	0.3606	0.419	0.418	0.0296	4.791	0.06616	1944	1408	856	378	879	162	1354	986	48.92	21.64	50.74	74.33	20.63
PGAL8A_00029700	822	246	29.93	PF3D7_0508600	conserved Plasmodium protein, unknown function		0.0052	0.0826	0.0974	0.005	0.078	0.0168	0.0753	0.0773	0.1028	0.103	0.0766	0.0693	0.0709	0.0719	0.1107	0.1115	0.0968	0.0984	0.0975	0.0968	0.0957	0.0905	0.0901	0.1693	0.1676	0.1695	0.1681	0.0001	48.443	0.03202	4121	3336	3530	2341	3675	3685	3445	3664	75.26	57.97	73.58	90.51	81.15
PGAL8A_00029800	4305	1947	45.23	PF3D7_0508700	pre-mRNA-processing ATP-dependent RNA helicase PRP5, putative		0.0232	0.0937	0.1527	0.0078	0.1254	0.0361	0.0943	0.1192	0.1025	0.0964	0.0914	0.0925	0.1202	0.1293	0.1047	0.1014	0.1373	0.1112	0.1113	0.135	0.152	0.1125	0.1157	0.1379	0.1381	0.1496	0.151	0.0069	44.555	0.0197	3350	3135	2875	1638	3087	2803	3121	3138	74.78	71.3	54.8	50.41	52.22
PGAL8A_00029900	834	513	61.51	PF3D7_0508800	single-stranded DNA-binding protein	PfSSB	0.0432	0.1286	0.199	0.0089	0.1396	0.0026	0.1266	0.134	0.0985	0.0933	0.1423	0.1428	0.1378	0.1409	0.0968	0.0919	0.1937	0.116	0.1157	0.1961	0.2008	0.1175	0.1173	0.1171	0.1148	0.1197	0.1166	0.0093	61.234	0.01716	2405	2512	2363	1417	2889	4197	2556	2913	38.27	59.15	78.92	71.33	16.44
PGAL8A_00030100	897	786	87.63	PF3D7_0509000	SNAP protein (soluble N-ethylmaleimide-sensitive factor attachment protein), putative		0.0255	0.0366	0.0747	0.0016	0.0723	0.0213	0.035	0.0718	0.0695	0.0696	0.0458	0.0476	0.0787	0.0778	0.083	0.087	0.0717	0.08	0.0821	0.0742	0.0773	0.0822	0.0802	0.0993	0.1039	0.1007	0.1004	0.0196	66.387	0.03276	3258	3992	3754	3361	3738	3503	4007	3729	73.95	70.95	86.45	85.22	88.8
PGAL8A_00030200	4428	2439	55.08	PF3D7_0509100	structural maintenance of chromosomes protein 4, putative		0.0185	0.0851	0.1719	0.0047	0.1434	0.0546	0.0856	0.1289	0.101	0.0946	0.095	0.0974	0.1321	0.147	0.1054	0.0991	0.1535	0.1258	0.1244	0.153	0.1706	0.1271	0.1269	0.1607	0.1653	0.1741	0.1769	0.0184	102.395	0.01834	3580	3291	2653	2441	2836	1969	3279	2989	49.85	50.84	83.09	84.82	67.21
PGAL8A_00030300	1041	519	49.86	PF3D7_0509200	leucine-rich repeat protein	PfLRR2	0.0888	0.2353	0.3613	0.0051	0.3394	0.1124	0.2445	0.3682	0.2179	0.2259	0.2508	0.244	0.3757	0.3598	0.2225	0.2324	0.3842	0.2274	0.2291	0.377	0.3465	0.2258	0.2276	0.3544	0.3609	0.3179	0.3098	0.0163	13.98	0.08914	745	1031	1015	2320	917	533	944	642	58.16	25.69	16.48	18.17	67.49
PGAL8A_00030400	450	75	16.67	PF3D7_0509300	conserved Plasmodium protein, unknown function		0.0158	0.0213	0.0549	0	0.0352	0.0383	0.0164	0.0756	0.0864	0.0856	0.0366	0.0377	0.0981	0.0526	0.106	0.1046	0.1063	0.1078	0.1067	0.1048	0.0551	0.1087	0.1068	0.0929	0.0924	0.092	0.0916	0.0006	117.455	0.01756	3707	4144	3923	3943	4082	2686	4184	3684	86.71	91.78	71.06	68.17	85.2
PGAL8A_00030500	8016	4818	60.1	PF3D7_0509400	RNA polymerase I	PfRNAPI	0.0287	0.1013	0.189	0.0029	0.1905	0.0673	0.1012	0.1848	0.1628	0.1598	0.0929	0.093	0.1809	0.1859	0.1618	0.155	0.1845	0.1474	0.1484	0.1847	0.1893	0.1483	0.1485	0.2142	0.2067	0.2221	0.2123	0.0299	92.887	0.0198	3099	2995	2460	2972	2276	1505	2994	2243	85.2	88.54	53.02	40.61	36.23
PGAL8A_00030600	993	627	63.14	PF3D7_0509500	ERCC4 domain-containing protein, putative		0.0547	0.1914	0.3808	0.0075	0.3567	0.0971	0.1936	0.321	0.202	0.198	0.2024	0.202	0.3071	0.3425	0.187	0.1829	0.3609	0.2582	0.2499	0.3548	0.3763	0.2493	0.2465	0.33	0.3176	0.3584	0.355	0.0117	35.007	0.05776	1883	1520	907	1710	813	749	1488	898	29.24	40.28	35.68	47.72	26.05
PGAL8A_00030700	1923	1137	59.13	PF3D7_0509600	asparagine--tRNA ligase		0.0477	0.1176	0.2673	0.001	0.2684	0.1062	0.1186	0.2347	0.1482	0.1511	0.1189	0.1201	0.2343	0.2859	0.1485	0.1513	0.2299	0.1537	0.1552	0.2312	0.269	0.1514	0.1529	0.2405	0.2444	0.2821	0.2914	0.014	27.985	0.03074	2204	2712	1702	3496	1433	624	2698	1657	58.59	65.41	56.33	39.64	18.44
PGAL8A_00030800	984	699	71.04	PF3D7_0509700	conserved Plasmodium protein, unknown function		0.1464	0.4855	0.8174	0.0103	0.5923	0.1244	0.4904	0.5277	0.3985	0.4142	0.464	0.478	0.5544	0.5994	0.3895	0.4083	0.8192	0.5949	0.5795	0.8208	0.8179	0.5937	0.5781	0.5951	0.6011	0.6557	0.6324	0.0292	29.323	0.10232	150	110	69	1142	188	379	104	214	20.43	28.09	22.45	16.94	70.33
PGAL8A_00030900	4449	2274	51.11	PF3D7_0509800	phosphatidylinositol 4-kinase		0.0227	0.058	0.1258	0.001	0.127	0.0467	0.0569	0.1116	0.1011	0.1045	0.061	0.061	0.1181	0.13	0.1085	0.1085	0.1105	0.1098	0.1101	0.1089	0.124	0.1083	0.1086	0.1371	0.1399	0.1514	0.1569	0.0128	80.118	0.02066	3378	3732	3176	3496	3071	2305	3753	3242	83.24	87.62	78.95	80.37	59.93
PGAL8A_00031000	927	603	65.05	PF3D7_0509900	conserved Plasmodium protein, unknown function		0.0476	0.1427	0.2933	0.0175	0.3406	0.1067	0.148	0.3176	0.2253	0.225	0.1246	0.1273	0.3227	0.3483	0.2299	0.2201	0.2735	0.2051	0.199	0.2993	0.3168	0.2098	0.1992	0.3274	0.3349	0.3517	0.3267	0.0424	17.702	0.09104	2207	2299	1495	414	903	618	2198	928	30.29	38.39	33.96	36.64	41.82
PGAL8A_00031100	2559	951	37.16	PF3D7_0510000	conserved Plasmodium protein, unknown function		0.0928	0.3081	0.5673	0.0091	0.5588	0.1202	0.3074	0.5008	0.3259	0.3173	0.2957	0.2944	0.472	0.555	0.3271	0.3252	0.5212	0.3545	0.3698	0.5274	0.5681	0.3537	0.3689	0.5543	0.5504	0.6063	0.5925	0.0221	21.463	0.12198	648	521	301	1374	225	424	531	252	28.02	39.16	42.44	72.96	47.62
PGAL8A_00031200	7335	1167	15.91	PF3D7_0510100	conserved Plasmodium protein, unknown function		0.1123	0.2617	0.5792	0.0131	0.551	0.1261	0.2612	0.4928	0.3832	0.384	0.2906	0.2846	0.4951	0.5626	0.3626	0.3655	0.5274	0.4198	0.4267	0.5195	0.5832	0.4158	0.4181	0.6031	0.6289	0.682	0.7129	0.0189	112.405	0.06698	379	803	277	781	241	358	814	264	34.72	56.53	80.72	78.47	36.18
PGAL8A_00031300	2214	1632	73.71	PF3D7_0510200	peptidyl-prolyl cis-trans isomerase		0.0277	0.0714	0.1177	0.0014	0.0986	0.0382	0.0714	0.0885	0.0595	0.0629	0.0758	0.0759	0.0838	0.0972	0.0614	0.0631	0.1033	0.0872	0.0871	0.1033	0.1156	0.0872	0.0872	0.0949	0.0954	0.1106	0.1135	0.0073	76.607	0.02936	3139	3513	3279	3408	3421	2694	3517	3518	62.25	69.78	60.91	71.66	61.12
PGAL8A_00031400	735	555	75.51	PF3D7_0510300	stripes inner membrane complex protein, putative // conserved basal apical peripheral protein, putative // transverse sutures component 1, putative	CBAP	0.0429	0.1102	0.1515	0.0022	0.1474	0.0479	0.1117	0.1587	0.1568	0.1526	0.0862	0.0876	0.1293	0.1386	0.1438	0.1398	0.1397	0.1574	0.1586	0.1415	0.1527	0.1605	0.1616	0.1738	0.1731	0.1846	0.1916	0.0154	35.94	0.06336	2420	2822	2882	3188	2792	2259	2811	2592	38.98	19.53	13.55	5.14	93.4
PGAL8A_00031600	1302	648	49.77	PF3D7_0510400	PDCD2 domain-containing protein, putative		0.1002	0.1732	0.2486	0.0035	0.2596	0.0634	0.1795	0.2376	0.2091	0.1955	0.1694	0.1758	0.2384	0.2593	0.2215	0.2107	0.2232	0.1933	0.1772	0.2305	0.256	0.1981	0.1821	0.2788	0.2652	0.3169	0.2966	0.0221	14.349	0.12194	522	1795	1866	2791	1527	1627	1697	1630	49.58	45.14	16.77	12.6	12.26
PGAL8A_00031700	2595	1686	64.97	PF3D7_0510500	topoisomerase I		0.0073	0.0379	0.0717	0.0007	0.0613	0.0184	0.0379	0.0649	0.0519	0.0484	0.0378	0.0378	0.0637	0.0596	0.0499	0.0472	0.0705	0.0553	0.0543	0.0705	0.0716	0.0553	0.0543	0.0681	0.0637	0.0661	0.0627	0.007	281.713	0.01648	4051	3977	3777	3549	3830	3626	3978	3789	52.83	72.34	66.9	60.69	31.4
PGAL8A_00031900	1050	528	50.29	PF3D7_0510700	conserved Plasmodium protein, unknown function		0.2583	0.656	0.7457	0.0099	0.7136	0.0938	0.6796	0.8096	0.7951	0.7982	0.6946	0.6699	1.0315	1.1036	2.1801	1.9791	0.7886	0.9227	0.9458	0.7908	0.7488	0.9196	0.9368	0.7465	0.7032	0.6779	0.6522	0.0462	5.507	0.30332	30	32	107	1208	88	811	30	32	3.95	14.75	1.45	5.14	46.91
PGAL8A_00032000	1917	1305	68.08	PF3D7_0510800	WD repeat-containing protein, putative		0.0619	0.104	0.1014	0.0044	0.1105	0.0234	0.105	0.1093	0.1384	0.1351	0.0995	0.0998	0.0991	0.1038	0.1365	0.1333	0.0983	0.1303	0.1271	0.0976	0.1007	0.134	0.1308	0.117	0.1117	0.132	0.127	0.008	7.3	0.09954	1568	2936	3479	2528	3282	3415	2918	3261	24.44	11.42	12.48	14.09	57.49
PGAL8A_00032200	516	513	99.42	PF3D7_0511000	translationally-controlled tumor protein homolog // histamine-releasing factor	PfTCTP	0.0247	0.0605	0.0666	0.0046	0.062	0.0055	0.0629	0.0604	0.0781	0.073	0.0502	0.0524	0.0569	0.0585	0.0702	0.0678	0.0653	0.0585	0.0534	0.0599	0.0613	0.0591	0.054	0.0498	0.0486	0.0561	0.0548	0.0046	708.759	0.07276	3289	3690	3812	2465	3821	4111	3657	3837	96.12	95.15	94.91	92.25	95.36
PGAL8A_00032300	360	207	57.5	PF3D7_0511100	conserved Plasmodium protein, unknown function		0.0295	0.2099	0.2473	0.0064	0.1975	0.0184	0.1983	0.1793	0.1961	0.1924	0.1898	0.1794	0.172	0.1885	0.1993	0.196	0.205	0.2821	0.2766	0.216	0.2335	0.2673	0.2624	0.2464	0.243	0.2256	0.2233	0.0001	15.826	0.0359	3065	1295	1886	1943	2191	3626	1431	2315	26.16	34.65	23.85	5.14	88.32
PGAL8A_00032400	2847	1806	63.44	PF3D7_0511200	stearoyl-CoA desaturase		0.0367	0.0881	0.1162	0.0033	0.1153	0.0167	0.0905	0.1188	0.1248	0.1245	0.0878	0.0905	0.1174	0.115	0.1214	0.1183	0.1141	0.1299	0.1269	0.1185	0.1207	0.1327	0.1297	0.1331	0.1305	0.1362	0.1311	0.016	92.065	0.06714	2715	3226	3304	2843	3215	3691	3192	3144	42.17	21.46	81.39	86.76	51.08
PGAL8A_00032500	3765	2136	56.73	PF3D7_0511300	MORN repeat protein, putative		0.0781	0.1833	0.318	0.0038	0.2728	0.0589	0.1834	0.2657	0.2296	0.2268	0.1851	0.1858	0.2934	0.2876	0.2489	0.2518	0.3116	0.2524	0.2505	0.3127	0.3192	0.254	0.2519	0.3252	0.3143	0.3328	0.3284	0.0274	57.481	0.1035	1013	1641	1280	2709	1399	1806	1628	1337	9.54	45.75	26.24	25.1	15.22
PGAL8A_00032700	1353	333	24.61	PF3D7_0511400	conserved Plasmodium protein, unknown function		0.1309	0.8491	0.8454	0.0354	0.6704	0.1817	0.8829	0.6803	0.7134	0.7644	0.7764	0.7968	0.6595	0.6232	0.6261	0.6396	0.9756	0.7963	0.9099	0.9847	0.8275	0.7897	0.9052	0.7197	0.861	0.8434	0.9007	0.0794	2.238	0.2394	218	10	58	41	110	73	9	81	6.61	26.43	13.02	13.14	13.03
PGAL8A_00032900	486	156	32.1	PF3D7_0511600	apical rhoptry neck protein		0.0867	0.1332	0.2666	0	0.2338	0.1512	0.1329	0.3471	0.3897	0.3612	0.1399	0.1403	0.3534	0.2209	0.3869	0.3581	0.3627	0.3659	0.3679	0.3623	0.2659	0.3655	0.3674	0.3884	0.3778	0.3666	0.3749	0.0322	9.906	0.06824	793	2442	1707	3943	1800	169	2449	751	70.61	37.81	34.45	57.52	34.65
PGAL8A_00033000	537	417	77.65	PF3D7_0511700	EKC/KEOPS complex subunit CGI121		0.0693	0.169	0.3707	0.0027	0.3521	0.0809	0.1714	0.2957	0.2469	0.2298	0.1792	0.182	0.2908	0.2948	0.2324	0.2224	0.3543	0.2495	0.2389	0.3583	0.3749	0.252	0.2414	0.3295	0.299	0.3882	0.3717	0.0313	19.044	0.04302	1277	1850	963	3043	837	1092	1832	1074	80.34	46.62	30.48	58.99	59.84
PGAL8A_00033100	1803	1563	86.69	PF3D7_0511800	inositol-3-phosphate synthase		0.0494	0.1313	0.1449	0.0052	0.1692	0.0365	0.1336	0.1698	0.1531	0.1595	0.1205	0.1237	0.1609	0.1635	0.1511	0.1565	0.141	0.1382	0.142	0.1397	0.1449	0.1382	0.1427	0.1543	0.161	0.1625	0.1685	0.0322	1.636	0.0334	2125	2460	2971	2292	2543	2779	2436	2449	89.84	74.71	90.48	86.46	41.25
PGAL8A_00033200	1914	639	33.39	PF3D7_0511900	conserved Plasmodium protein, unknown function		0.0855	0.2581	0.547	0.0128	0.5571	0.1297	0.2635	0.5016	0.2678	0.3261	0.2421	0.2509	0.4839	0.5212	0.2834	0.3254	0.5279	0.2802	0.2984	0.5216	0.5398	0.2811	0.2944	0.5407	0.5247	0.5751	0.5933	0.072	3.962	0.1113	823	834	333	811	228	323	795	249	14.9	29.89	16.27	17.67	16.5
PGAL8A_00033300	360	255	70.83	PF3D7_0512000	prefoldin subunit 6, putative		0.0159	0.1164	0.111	0.0001	0.0464	0.009	0.1169	0.0574	0.0586	0.0714	0.1092	0.1091	0.0618	0.0582	0.0692	0.076	0.1098	0.1179	0.1088	0.1096	0.1108	0.1192	0.1098	0.0686	0.0554	0.0566	0.0541	0.0161	62.473	0.01228	3702	2732	3374	3612	3978	3998	2722	3870	86.34	93.01	87.76	87.87	97.68
PGAL8A_00033400	378	180	47.62	PF3D7_0512100	conserved Plasmodium protein, unknown function		0.0132	0.0441	0.1162	0	0.1722	0.0326	0.0441	0.1507	0.0402	0.0407	0.0419	0.0419	0.1359	0.1522	0.037	0.0383	0.12	0.0723	0.0694	0.12	0.1162	0.0723	0.0694	0.1301	0.131	0.1463	0.146	0.0003	28.303	0.0261	3828	3904	3304	3943	2500	2988	3902	2682	40.19	35.07	29.27	29.04	84.65
PGAL8A_00033600	783	645	82.38	PF3D7_0512300	CDK-activating kinase assembly factor MAT1	PfMAT1	0.0261	0.1024	0.1928	0.0017	0.1432	0.0502	0.1002	0.1267	0.0911	0.0908	0.1017	0.1022	0.1231	0.1421	0.0895	0.0917	0.1598	0.144	0.1326	0.161	0.1945	0.1415	0.1302	0.1381	0.1374	0.1401	0.1475	0.0099	61.194	0.04126	3231	2968	2419	3337	2843	2154	3017	3018	64.6	60.19	45.65	28.73	61.4
PGAL8A_00033700	693	282	40.69	PF3D7_0512400	conserved Plasmodium protein, unknown function		0.0612	0.4392	0.7936	0.0172	0.5056	0.1216	0.4961	0.3809	0.6385	0.6323	0.464	0.5123	0.4195	0.5567	0.686	0.6755	0.6355	0.8801	0.8394	0.6294	0.7769	8.496	0.9075	0.7365	0.7072	0.7495	0.6831	0.0813	1.283	0.13992	1600	164	79	433	320	412	101	577	39.55	25.04	7.98	5.14	27.16
PGAL8A_00033900	2262	1077	47.61	PF3D7_0512500	conserved Plasmodium protein, unknown function		0.0698	0.2115	0.3893	0.0142	0.3816	0.116	0.2175	0.3535	0.2151	0.2164	0.2031	0.2113	0.3339	0.3543	0.1975	0.2043	0.3742	0.2442	0.2484	0.3856	0.3947	0.2599	0.2596	0.4043	0.3979	0.4415	0.4318	0.0357	33.285	0.23542	1260	1276	861	682	694	480	1220	709	20.39	24.27	34.76	43.1	31.14
PGAL8A_00034000	603	552	91.54	PF3D7_0512600	ras-related protein Rab-1B		0.0151	0.0248	0.032	0.0001	0.0173	0.0074	0.0245	0.0127	0.0158	0.0133	0.0339	0.0337	0.0199	0.0232	0.0282	0.025	0.0288	0.0278	0.0299	0.0288	0.032	0.0273	0.0294	0.0156	0.0127	0.0188	0.0159	0.0024	135.987	0.00968	3743	4105	4100	3612	4206	4048	4112	4240	91.73	82.88	95.19	94.18	96.68
PGAL8A_00034100	723	399	55.19	PF3D7_0512700	orotate phosphoribosyltransferase	PfOPRT	0.0515	0.2395	0.2707	0.0126	0.1923	0.0364	0.2246	0.1792	0.2076	0.2057	0.2584	0.2421	0.2049	0.2195	0.2127	0.2068	0.2249	0.2746	0.2824	0.2163	0.2613	0.268	0.2669	0.1947	0.1809	0.1939	0.1794	0.0446	57.22	0.06226	2022	989	1657	835	2249	2787	1146	2316	58.91	71.13	37.3	19.71	61.83
PGAL8A_00034200	3783	1275	33.7	PF3D7_0512800	conserved Plasmodium protein, unknown function		0.1172	0.515	0.9535	0.0283	0.7988	0.109	0.5176	0.7855	0.4945	0.4846	0.4768	0.4847	0.6845	0.7245	0.477	0.4798	0.8685	0.6052	0.6164	0.8624	0.948	0.6042	0.5972	0.8182	0.8836	0.8457	0.8883	0.0932	3.342	0.2709	334	86	36	89	56	584	83	39	32.98	54.47	29.29	19.27	34.48
PGAL8A_00034300	846	468	55.32	PF3D7_0512900	AKAP-like protein // A-kinase anchor protein-like		0.0768	0.1877	0.3007	0.005	0.229	0.0456	0.182	0.2487	0.1925	0.2192	0.1843	0.1764	0.2576	0.2318	0.1914	0.2144	0.3036	0.2178	0.2396	0.3117	0.3096	0.2126	0.234	0.3003	0.309	0.2839	0.2912	0.0333	1.544	0.06132	1057	1575	1429	2341	1838	2350	1662	1513	45.75	49.18	50.39	43.73	16.36
PGAL8A_00034400	807	675	83.64	PF3D7_0513000	conserved Plasmodium protein, unknown function		0.0428	0.1419	0.2573	0.0052	0.2305	0.044	0.1409	0.2091	0.1561	0.1525	0.1449	0.1438	0.1981	0.2142	0.1599	0.1619	0.2486	0.2018	0.1787	0.2463	0.2546	0.2019	0.18	0.2443	0.2331	0.2486	0.2377	0.0391	9.758	0.04474	2428	2315	1797	2292	1828	2426	2329	1952	43.64	53.13	49.51	39.28	79
PGAL8A_00034500	753	630	83.67	PF3D7_0513100	conserved Plasmodium protein, unknown function		0.0318	0.0793	0.0862	0	0.1137	0.0213	0.0796	0.1156	0.0763	0.0722	0.0809	0.0809	0.1242	0.1199	0.083	0.0805	0.0908	0.0753	0.0775	0.0908	0.0862	0.0753	0.0775	0.0896	0.0862	0.0888	0.0856	0.0165	21.155	0.0163	2952	3373	3658	3943	3235	3503	3378	3184	75.52	54.72	85.17	90.31	90.05
PGAL8A_00034600	6765	3099	45.81	PF3D7_0513200	conserved Plasmodium protein, unknown function		0.0668	0.213	0.5223	0.0138	0.448	0.1564	0.2194	0.389	0.2454	0.2625	0.2138	0.2206	0.3958	0.4516	0.2448	0.2619	0.4626	0.282	0.2869	0.4658	0.5246	0.2814	0.2903	0.441	0.4319	0.4885	0.4739	0.0735	39.238	0.07486	1368	1256	385	718	446	149	1199	555	80.8	66.68	50.22	61.88	32.25
PGAL8A_00034700	738	729	98.78	PF3D7_0513300	purine nucleoside phosphorylase	PfPNP	0.0498	0.094	0.1017	0.0016	0.0896	0.0221	0.0939	0.0855	0.1233	0.122	0.1029	0.1008	0.0862	0.0987	0.1389	0.1324	0.1048	0.1256	0.1291	0.1052	0.102	0.1234	0.1271	0.1149	0.1146	0.106	0.1039	0.01	39.844	0.0221	2107	3130	3476	3361	3522	3471	3132	3552	95.53	96.94	97.65	92.76	92.3
PGAL8A_00034800	855	666	77.89	PF3D7_0513400	GTP-binding protein, putative		0.0468	0.0651	0.2105	0.0019	0.179	0.0552	0.0647	0.1504	0.1031	0.0979	0.0708	0.069	0.1634	0.1825	0.1047	0.1043	0.1723	0.1193	0.1148	0.1701	0.2081	0.1174	0.1129	0.1616	0.1705	0.1879	0.201	0.0146	8.296	0.05064	2243	3621	2244	3277	2404	1948	3626	2686	47.64	52.66	54.41	27.38	73.43
PGAL8A_00034900	375	318	84.8	PF3D7_0513500	mitochondrial import inner membrane translocase subunit TIM16, putative		0.0278	0.0518	0.1296	0	0.1357	0.0206	0.0518	0.113	0.087	0.0909	0.0722	0.0722	0.1347	0.1507	0.111	0.115	0.1142	0.1069	0.111	0.1142	0.1296	0.1069	0.111	0.1596	0.164	0.1814	0.1866	0.0079	11.537	0.04592	3136	3808	3128	3943	2944	3544	3806	3224	53.16	72.37	39.9	20.72	82.71
PGAL8A_00035000	2331	1392	59.72	PF3D7_0513600	deoxyribodipyrimidine photo-lyase, putative		0.0352	0.1552	0.2875	0.0158	0.2397	0.1139	0.1503	0.2094	0.1711	0.18	0.1499	0.1428	0.217	0.2392	0.1605	0.1718	0.2503	0.1911	0.1869	0.2354	0.2778	0.1785	0.1757	0.2253	0.2342	0.2626	0.2652	0.0144	51.14	0.10384	2785	2080	1533	537	1739	513	2159	1948	52.64	79.47	84.59	70.99	76.06
PGAL8A_00035200	2151	1758	81.73	PF3D7_0513700	secreted ookinete protein, putative // 6-cysteine protein		0.176	0.44	0.5148	0.0203	0.5176	0.1146	0.4499	0.5001	0.5074	0.4911	0.4729	0.4758	0.5481	0.5401	0.5264	0.5137	0.4996	0.4614	0.4554	0.5115	0.5176	0.4639	0.4631	0.4251	0.4122	0.4549	0.4346	0.0416	20.246	0.05902	90	162	405	283	302	499	151	253	17.96	18.33	20.74	17.58	56.6
PGAL8A_00035300	621	519	83.57	PF3D7_0513800	ras-related protein Rab-1A		0.0089	0.0413	0.0726	0.0023	0.0719	0.0276	0.0443	0.0528	0.0543	0.0538	0.039	0.0419	0.0553	0.0811	0.0594	0.0591	0.0637	0.0527	0.0522	0.0663	0.0748	0.056	0.0511	0.0701	0.0692	0.0842	0.0832	0.0045	67.859	0.00674	3991	3933	3767	3154	3740	3226	3901	3911	43.39	53.21	87.54	78.29	88.85
PGAL8A_00035400	717	612	85.36	PF3D7_0513900	conserved Plasmodium protein, unknown function		0.0858	0.1896	0.4458	0.0102	0.4822	0.1633	0.1937	0.393	0.1711	0.1859	0.1897	0.1878	0.3994	0.4879	0.2057	0.2017	0.4109	0.2385	0.2297	0.406	0.4458	0.2429	0.234	0.4049	0.3939	0.457	0.4509	0.0347	11.41	0.31218	814	1549	605	1159	362	121	1486	535	10.16	33.17	49.33	55.08	84.21
PGAL8A_00035500	1266	1131	89.34	PF3D7_0514000	tubulin--tyrosine ligase, putative		0.0209	0.0493	0.1261	0.0046	0.12	0.0539	0.0473	0.099	0.0716	0.0688	0.0492	0.0474	0.0987	0.1204	0.0707	0.0668	0.1004	0.0666	0.0636	0.0964	0.1215	0.0651	0.0622	0.108	0.1054	0.1274	0.1266	0.0032	37.387	0.03744	3472	3847	3169	2465	3163	1998	3866	3387	16.89	15.68	31.19	31.75	33.63
PGAL8A_00035600	3384	1566	46.28	PF3D7_0514100	ATP-dependent DNA helicase UvrD		0.0465	0.1385	0.2264	0.0099	0.203	0.085	0.1391	0.1918	0.171	0.1683	0.143	0.1433	0.1895	0.1987	0.1713	0.1671	0.2026	0.1997	0.2007	0.206	0.2252	0.2007	0.2017	0.2512	0.2431	0.2586	0.2557	0.0132	30.91	0.03976	2254	2372	2091	1208	2119	995	2358	2149	25.06	39.92	60.31	68.74	58.01
PGAL8A_00035700	1695	966	56.99	PF3D7_0514200	conserved Plasmodium protein, unknown function		0.1262	0.3488	0.5259	0.0119	0.4948	0.1304	0.3496	0.4618	0.4269	0.4181	0.3396	0.3395	0.4995	0.5261	0.4586	0.4613	0.504	0.4582	0.4534	0.516	0.5438	0.4657	0.4605	0.5099	0.5025	0.5524	0.5828	0.0586	11.742	0.07034	251	370	376	918	338	314	359	331	33.22	44.5	53.12	59.93	32.98
PGAL8A_00035800	2976	987	33.17	PF3D7_0514300	aspartate--tRNA ligase, putative		0.0775	0.2001	0.3011	0.012	0.3024	0.1	0.2047	0.2621	0.1982	0.2043	0.1929	0.1973	0.2699	0.3004	0.2228	0.2212	0.2969	0.2369	0.2312	0.2933	0.3028	0.2412	0.2368	0.3403	0.353	0.3627	0.3681	0.0413	24.881	0.06948	1032	1411	1427	905	1159	716	1350	1368	47.38	60.39	51.98	47.98	28.39
PGAL8A_00036100	462	300	64.94	PF3D7_0514500	conserved Plasmodium membrane protein, unknown function		0.0635	0.1597	0.1946	0.008	0.2365	0.0342	0.1621	0.2469	0.2264	0.2366	0.149	0.1509	0.232	0.219	0.1941	0.2038	0.1815	0.1821	0.1647	0.1851	0.2054	0.1891	0.1732	0.288	0.2637	0.3003	0.2747	0.0292	16.584	0.14726	1511	2003	2401	1601	1773	2895	1973	1531	41.27	21.39	15.55	16.34	92.33
PGAL8A_00036200	4308	1224	28.41	PF3D7_0514700	conserved Plasmodium protein, unknown function		0.1251	0.4223	0.7166	0.0239	0.6616	0.1237	0.4372	0.6208	0.435	0.3981	0.4354	0.4194	0.5822	0.6243	0.4456	0.4145	0.6699	0.5093	0.5144	0.6642	0.7177	0.503	0.5055	0.5856	0.584	0.6724	0.6635	0.0457	16.273	0.14376	260	186	129	163	119	389	166	119	10.97	10.26	7.25	14.19	14.64
PGAL8A_00036300	3552	975	27.45	PF3D7_0514800	inositol polyphosphate multikinase, putative		0.0857	0.2734	0.5385	0.0211	0.5065	0.1031	0.2738	0.457	0.3116	0.3055	0.2811	0.286	0.4422	0.4818	0.3289	0.3287	0.5192	0.3922	0.412	0.5188	0.5413	0.3966	0.4113	0.4502	0.4478	0.4713	0.4526	0.0526	15.044	0.11866	818	726	353	252	318	668	721	347	49.4	50.61	36.28	36.73	9.26
PGAL8A_00036400	960	333	34.69	PF3D7_0514900	conserved Plasmodium protein, unknown function		0.0447	0.1232	0.2395	0.0071	0.1758	0.0257	0.1218	0.1461	0.1782	0.1826	0.1046	0.1138	0.1686	0.2072	0.1688	0.1731	0.1985	0.2012	0.198	0.1952	0.235	0.2119	0.2089	0.2455	0.2405	0.2808	0.2864	0.0219	28.139	0.03674	2346	2613	1962	1799	2447	3310	2638	2745	80.87	63.89	62.14	55.13	74.26
PGAL8A_00036500	2526	804	31.83	PF3D7_0515000	pre-mRNA-splicing factor CWC2, putative		0.0118	0.0738	0.1886	0.0057	0.1858	0.0801	0.0721	0.1528	0.1433	0.1335	0.0719	0.072	0.1576	0.1872	0.1443	0.1358	0.1701	0.166	0.1592	0.1632	0.1843	0.1684	0.1573	0.2298	0.2146	0.2516	0.2481	0.0209	205.104	0.02964	3884	3469	2464	2121	2330	1119	3503	2655	85.51	89.72	91.09	93.7	57.66
PGAL8A_00036600	1191	630	52.9	PF3D7_0515100	rhomboid protease ROM9		0.0626	0.2228	0.3839	0.0245	0.3528	0.1117	0.2319	0.2905	0.2261	0.2304	0.2286	0.2384	0.2938	0.3359	0.2226	0.2215	0.3376	0.285	0.2927	0.3393	0.3835	0.2806	0.2847	0.3119	0.3131	0.3498	0.3505	0.0101	2.979	0.07786	1536	1159	887	154	831	541	1060	1105	35.21	44.19	59.89	63.25	78.86
PGAL8A_00036800	5901	2241	37.98	PF3D7_0515300	phosphatidylinositol 3-kinase	VPS34	0.0345	0.1232	0.2338	0.0136	0.2214	0.0565	0.1244	0.2058	0.1507	0.1468	0.118	0.1205	0.2016	0.2185	0.1521	0.1455	0.2252	0.1766	0.1688	0.2215	0.2285	0.1798	0.1714	0.2402	0.2353	0.2522	0.2483	0.0147	30.821	0.04224	2830	2613	2018	736	1925	1895	2593	1992	63.29	70.71	73.64	86.43	51.51
PGAL8A_00036900	1929	765	39.66	PF3D7_0515400	conserved Plasmodium protein, unknown function		0.0471	0.101	0.1647	0.005	0.1761	0.0639	0.0982	0.1394	0.1545	0.1523	0.0966	0.093	0.1275	0.1644	0.1514	0.1454	0.1271	0.1528	0.1535	0.1233	0.1611	0.1493	0.1501	0.1799	0.1819	0.2195	0.2175	0.03	161.95	0.06296	2226	2997	2740	2341	2442	1609	3059	2840	21.19	9.29	62.54	81.89	34.12
PGAL8A_00037000	2700	1419	52.56	PF3D7_0515500	amino acid transporter, putative		0.0469	0.2059	0.3573	0.0149	0.3318	0.095	0.2109	0.2913	0.2448	0.2328	0.1981	0.2034	0.2868	0.3334	0.2421	0.2306	0.3063	0.2739	0.2697	0.3191	0.3702	0.2777	0.2776	0.3262	0.3206	0.3478	0.3523	0.0202	1.465	0.06438	2238	1335	1036	617	958	785	1293	1099	7.93	5.37	15.79	17.19	55.53
PGAL8A_00037100	4077	2043	50.11	PF3D7_0515600	conserved Plasmodium protein, unknown function		0.0639	0.1942	0.3913	0.0049	0.3725	0.1112	0.197	0.3325	0.2414	0.2401	0.1787	0.1786	0.3399	0.3703	0.2294	0.2304	0.3631	0.2817	0.2839	0.3623	0.3923	0.2865	0.2888	0.3922	0.3901	0.4191	0.4173	0.0193	27.771	0.081	1497	1485	847	2382	735	548	1455	824	20.81	17.14	26.52	42.31	67.77
PGAL8A_00037200	1389	1134	81.64	PF3D7_0515700	glideosome-associated protein 40, putative		0.0148	0.0529	0.0544	0.0001	0.0745	0.0097	0.0529	0.071	0.1085	0.1063	0.0566	0.0568	0.0617	0.0703	0.1006	0.1013	0.0504	0.0823	0.0811	0.0502	0.0542	0.0823	0.0811	0.0738	0.0722	0.0809	0.0777	0.0068	660.261	0.0133	3761	3791	3929	3612	3710	3970	3792	3735	68.25	47.57	98.03	98.77	94.62
PGAL8A_00037300	267	252	94.38	PF3D7_0515800	BolA-like protein, putative		0.0368	0.0969	0.1441	0	0.1609	0.0604	0.0969	0.1354	0.1033	0.0973	0.1168	0.1169	0.1425	0.1645	0.1104	0.1053	0.1397	0.1244	0.1174	0.1397	0.1441	0.1244	0.1173	0.1541	0.1483	0.1599	0.1543	0.0049	22.215	0.03294	2707	3074	2979	3943	2639	1742	3076	2892	57.94	69.81	73.43	5.14	90.5
PGAL8A_00037400	981	900	91.74	PF3D7_0515900	NLI interacting factor-like phosphatase, putative		0.0192	0.1052	0.1619	0.0051	0.1779	0.0693	0.1077	0.1535	0.1277	0.1304	0.1028	0.1058	0.1501	0.1738	0.1375	0.1366	0.1454	0.1477	0.14	0.1488	0.1658	0.151	0.1432	0.1838	0.182	0.1948	0.1912	0.0065	41.545	0.01974	3554	2909	2770	2320	2415	1437	2871	2646	32.59	71.72	60.74	70.78	50.35
PGAL8A_00037500	2979	1491	50.05	PF3D7_0516000	RAP protein, putative		0.0475	0.2099	0.3866	0.0171	0.3053	0.0885	0.2086	0.2625	0.1969	0.1993	0.1934	0.1934	0.2528	0.2856	0.1913	0.1974	0.3335	0.2626	0.2585	0.331	0.3857	0.2636	0.2615	0.3016	0.2988	0.3479	0.3412	0.0301	48.472	0.07546	2211	1295	877	437	1143	922	1309	1364	32.96	65.12	30.34	28.18	37.44
PGAL8A_00037700	456	378	82.89	PF3D7_0516200	40S ribosomal protein S11		0.0031	0.0095	0.0077	0.0002	0.0188	0.0038	0.0095	0.014	0.0166	0.0164	0.0063	0.0063	0.0105	0.015	0.0132	0.013	0.0036	0.0073	0.0072	0.0036	0.0077	0.0069	0.0068	0.0111	0.0111	0.0076	0.0077	0.0002	557.466	0.00542	4184	4240	4259	3573	4199	4154	4240	4230	98.49	98.63	97.78	97.72	98.04
PGAL8A_00037800	1566	888	56.7	PF3D7_0516300	tRNA pseudouridine synthase, putative		0.0349	0.1226	0.2191	0.0028	0.2127	0.0916	0.1219	0.1934	0.148	0.1503	0.125	0.1286	0.18	0.2031	0.1363	0.1427	0.2125	0.18	0.1822	0.2173	0.224	0.1837	0.1843	0.2284	0.226	0.2581	0.2547	0.0287	4.245	0.04366	2808	2625	2163	3014	2023	847	2636	2131	74.42	70.16	37.16	18.13	20.05
PGAL8A_00037900	945	480	50.79	PF3D7_0516400	phosducin-like protein, putative		0.0174	0.0862	0.1659	0.0025	0.1577	0.0743	0.0895	0.137	0.1144	0.1357	0.0907	0.0936	0.1397	0.1589	0.1212	0.1418	0.1502	0.1225	0.1274	0.1542	0.17	0.1224	0.1272	0.2029	0.2144	0.1955	0.2073	0.0225	119.554	0.02946	3633	3264	2730	3104	2677	1277	3206	2873	49.23	77.05	77.46	95.81	80.16
PGAL8A_00038000	1329	1041	78.33	PF3D7_0516500	major facilitator superfamily domain-containing protein, putative		0.0352	0.0912	0.1304	0.0001	0.141	0.065	0.091	0.1415	0.113	0.1145	0.0852	0.0852	0.14	0.1369	0.1096	0.1109	0.1346	0.1177	0.1182	0.1348	0.1304	0.1178	0.118	0.1623	0.1583	0.151	0.1464	0.0086	22.327	0.0354	2785	3177	3120	3612	2877	1572	3180	2818	53.78	37.63	60.79	67.41	83.85
PGAL8A_00038100	4638	1944	41.91	PF3D7_0516600	sporozoite surface antigen MB2 // translation initiation factor IF-2	PfMB2	0.0707	0.1818	0.3068	0.0089	0.3121	0.1053	0.1823	0.2878	0.2147	0.2138	0.1683	0.1711	0.2804	0.3006	0.2148	0.2104	0.2833	0.2245	0.2159	0.2824	0.3063	0.2238	0.2155	0.3101	0.3211	0.351	0.3656	0.0407	61.436	0.05226	1237	1667	1368	1417	1096	633	1656	1128	61.61	75.99	64.01	70.83	37.36
PGAL8A_00038200	3540	2634	74.41	PF3D7_0516700	ubiquitin carboxyl-terminal hydrolase 2, putative		0.0252	0.0859	0.1432	0.0022	0.1305	0.0472	0.0858	0.1208	0.134	0.1326	0.0813	0.0812	0.1163	0.1209	0.1356	0.1333	0.1432	0.1527	0.1505	0.1427	0.1429	0.1504	0.1484	0.1752	0.1727	0.1807	0.1764	0.0201	66.025	0.02124	3271	3271	2986	3188	3028	2285	3275	3112	62.06	64.19	67.32	74.54	38.39
PGAL8A_00038300	5982	1326	22.17	PF3D7_0516800	AP2 domain transcription factor AP2-O2, putative	ApiAP2	0.0497	0.1922	0.2786	0.0072	0.231	0.0757	0.1909	0.2169	0.2239	0.2255	0.2024	0.2058	0.2346	0.255	0.2278	0.2296	0.2554	0.2572	0.2606	0.2559	0.2844	0.2506	0.2541	0.2497	0.249	0.2466	0.2515	0.0389	115.663	0.0401	2113	1511	1597	1776	1825	1239	1534	1858	49.3	32.04	81.46	77.32	57.83
PGAL8A_00038400	783	729	93.1	PF3D7_0516900	60S ribosomal protein L2		0.0046	0.0148	0.0207	0.0001	0.0255	0.0038	0.0149	0.025	0.028	0.028	0.0167	0.0167	0.0269	0.0274	0.0263	0.0264	0.0205	0.022	0.022	0.0205	0.0207	0.022	0.022	0.0218	0.022	0.0185	0.0186	0.0032	1331.88	0.00542	4145	4201	4177	3612	4147	4154	4201	4158	99.32	99.58	99.13	99.05	93.79
PGAL8A_00038500	498	438	87.95	PF3D7_0517000	60S ribosomal protein L12, putative		0.0106	0.039	0.0456	0.0002	0.0615	0.0032	0.039	0.0575	0.0643	0.0639	0.0413	0.0414	0.0567	0.0606	0.0594	0.0592	0.0427	0.0511	0.0508	0.0427	0.0456	0.0511	0.0508	0.036	0.0359	0.0408	0.0406	0.0005	234.73	0.00702	3934	3965	3996	3573	3827	4180	3964	3869	97.89	98.48	97.35	93.53	97.06
PGAL8A_00038600	1368	774	56.58	PF3D7_0517100	conserved Plasmodium protein, unknown function		0.1004	0.355	0.666	0.0299	0.5126	0.1304	0.3489	0.4623	0.4121	0.416	0.3777	0.3749	0.4961	0.5498	0.4238	0.4314	0.5762	0.499	0.4564	0.5391	0.6233	0.4925	0.457	0.6151	0.6576	0.6638	0.6879	0.0629	10.333	0.13786	518	352	172	70	308	314	364	329	78.03	51.01	30.52	25.91	50.11
PGAL8A_00038700	2493	924	37.06	PF3D7_0517200	conserved Plasmodium protein, unknown function		0.1043	0.3073	0.4022	0.0111	0.3478	0.1056	0.3122	0.38	0.2885	0.2845	0.3208	0.3298	0.3777	0.3651	0.2546	0.259	0.4408	0.3335	0.3377	0.4316	0.3941	0.3419	0.3374	0.3601	0.3681	0.3511	0.3596	0.0184	2.518	0.12802	466	525	792	1026	860	628	507	583	92.61	82.34	51.12	42.05	30.26
PGAL8A_00038800	903	495	54.82	PF3D7_0517300	serine/arginine-rich splicing factor 1		0.0189	0.0214	0.0555	0.0001	0.0594	0.0243	0.0216	0.0649	0.0414	0.0416	0.0366	0.0369	0.0713	0.0659	0.0466	0.0468	0.0607	0.0414	0.0416	0.0612	0.0557	0.0416	0.0418	0.0455	0.0457	0.0342	0.0342	0.0002	1100.41	0.0181	3562	4142	3918	3612	3852	3376	4138	3789	98.6	97.28	96.52	93.87	87.69
PGAL8A_00038900	3165	2589	81.8	PF3D7_0517400	FACT complex subunit SPT16, putative		0.0186	0.0593	0.0869	0.0045	0.0764	0.0328	0.0594	0.0748	0.0947	0.0929	0.0567	0.0568	0.0755	0.0756	0.0897	0.0886	0.0886	0.0976	0.096	0.0877	0.0864	0.0983	0.0971	0.1077	0.1073	0.1094	0.1096	0.0054	261.201	0.01688	3573	3710	3646	2491	3689	2977	3712	3695	87.88	93.49	93.54	96.56	81.86
PGAL8A_00039000	2169	1566	72.2	PF3D7_0517500	UTP--glucose-1-phosphate uridylyltransferase, putative		0.0429	0.1663	0.2947	0.0055	0.2511	0.0827	0.169	0.2144	0.192	0.1924	0.1762	0.1807	0.222	0.248	0.1797	0.1781	0.2542	0.2247	0.2216	0.2548	0.2953	0.2258	0.2218	0.2564	0.2537	0.2814	0.2723	0.0159	22.936	0.05556	2420	1888	1482	2180	1604	1046	1859	1886	56.24	33.04	21.29	51.67	63.53
PGAL8A_00039100	906	714	78.81	PF3D7_0517600	F-actin-capping protein subunit beta, putative		0.055	0.2018	0.2276	0.0132	0.1646	0.038	0.2137	0.138	0.1521	0.1476	0.1803	0.191	0.1313	0.1557	0.1343	0.1248	0.2034	0.2079	0.2028	0.2143	0.2337	0.2137	0.2084	0.1731	0.1621	0.1833	0.173	0.0137	9.073	0.05152	1871	1391	2076	772	2588	2705	1265	2860	56.93	35.09	21.17	50.53	62.58
PGAL8A_00039200	2151	1890	87.87	PF3D7_0517700	eukaryotic translation initiation factor 3 subunit B, putative		0.015	0.0623	0.0982	0.0012	0.0804	0.021	0.0623	0.0781	0.0609	0.0577	0.0643	0.0644	0.0814	0.0817	0.0635	0.0607	0.0986	0.0714	0.0678	0.0987	0.098	0.0711	0.0675	0.0636	0.0616	0.0627	0.0595	0.0055	146.076	0.011	3748	3667	3519	3456	3645	3521	3666	3655	90.2	90.53	85.6	62.71	69.47
PGAL8A_00039300	786	444	56.49	PF3D7_0517800	apicortin, putative // doublecortin domain-containing protein, putative		0.0428	0.2892	0.4219	0.0078	0.269	0.0902	0.2963	0.2236	0.1992	0.1904	0.3053	0.3131	0.2301	0.278	0.1807	0.1924	0.3557	0.3264	0.3174	0.3645	0.4321	0.3346	0.3257	0.2889	0.268	0.3406	0.3373	0.0233	31.666	0.11338	2428	619	706	1638	1429	886	578	1774	53.02	29.83	16.62	25.86	70.07
PGAL8A_00039500	1650	1359	82.36	PF3D7_0517900	zinc finger protein, putative		0.031	0.1229	0.2008	0.0064	0.1934	0.0495	0.1243	0.1881	0.1335	0.1239	0.1235	0.125	0.1909	0.194	0.132	0.1237	0.1984	0.1346	0.1296	0.1935	0.1986	0.1363	0.1313	0.2028	0.1975	0.1941	0.189	0.0108	45.482	0.04726	2998	2619	2350	1943	2228	2176	2594	2190	54.06	32.99	82.46	87.03	64.58
PGAL8A_00039600	813	438	53.87	PF3D7_0518000	NOSIP domain-containing protein, putative		0.0375	0.0843	0.1438	0.0056	0.1527	0.0394	0.0905	0.1337	0.1047	0.1003	0.0881	0.0879	0.1515	0.1728	0.113	0.1015	0.1255	0.1286	0.1058	0.128	0.1391	0.1242	0.1014	0.1422	0.1431	0.173	0.1646	0.025	154.717	0.04726	2666	3308	2980	2148	2736	2630	3192	2918	81.72	65.95	63.53	69.41	83.26
PGAL8A_00039700	3633	1686	46.41	PF3D7_0518100	RAP protein, putative		0.0624	0.2241	0.3297	0.0069	0.3153	0.0697	0.2246	0.307	0.2475	0.2555	0.2045	0.2064	0.3028	0.3154	0.2456	0.2451	0.3203	0.2636	0.2696	0.319	0.328	0.2649	0.2708	0.3586	0.3544	0.3718	0.3731	0.0593	31.695	0.0822	1550	1145	1201	1843	1070	1422	1146	1002	50.89	61.38	45.23	38.05	21.63
PGAL8A_00039800	435	306	70.34	PF3D7_0518200	SWIB/MDM2 domain-containing protein		0.0492	0.1062	0.151	0.0038	0.2021	0.0163	0.1101	0.1849	0.183	0.1635	0.1152	0.1187	0.1682	0.1833	0.1769	0.1674	0.1513	0.1765	0.1591	0.1563	0.156	0.178	0.159	0.1921	0.1738	0.2181	0.1911	0.0456	107.327	0.04734	2136	2891	2891	2709	2136	3713	2837	2240	41.38	20.52	83.76	84.58	83.23
PGAL8A_00039900	726	666	91.74	PF3D7_0518300	proteasome subunit beta type-1, putative		0.0508	0.0733	0.0988	0.0001	0.068	0.0226	0.0729	0.0609	0.0883	0.0878	0.0912	0.0909	0.0718	0.0846	0.1128	0.1031	0.0904	0.1056	0.1101	0.0903	0.0986	0.1055	0.11	0.1197	0.1151	0.1155	0.1134	0.0149	120.456	0.02554	2060	3477	3513	3612	3772	3453	3496	3831	85.81	87.52	93.6	90.81	93.73
PGAL8A_00040000	672	522	77.68	PF3D7_0518400	cyclin, putative	Pfcyc-3	0.0334	0.1151	0.1972	0.0159	0.1504	0.0618	0.1001	0.1451	0.0922	0.0901	0.1183	0.1089	0.154	0.1455	0.0936	0.093	0.1804	0.1294	0.1314	0.1735	0.1903	0.1178	0.1199	0.1578	0.1537	0.1709	0.1686	0.0068	28.118	0.0476	2872	2747	2375	529	2763	1686	3020	2768	18.14	15.87	17.66	5.14	55.55
PGAL8A_00040100	2721	1731	63.62	PF3D7_0518500	ATP-dependent RNA helicase DDX23, putative	PRP28	0.0134	0.0456	0.0704	0.0042	0.0633	0.0216	0.0454	0.0583	0.0564	0.0566	0.0458	0.0457	0.0563	0.0632	0.0522	0.0531	0.0615	0.0496	0.051	0.0629	0.0711	0.0487	0.0502	0.0625	0.0622	0.0683	0.066	0.0046	124.982	0.01754	3816	3888	3784	2591	3809	3491	3889	3862	87.33	82.07	82.03	76.25	53.11
PGAL8A_00043000	318	201	63.21	PF3D7_0702900	centrin, putative		0.0944	0.2156	0.2726	0.0001	0.2602	0.1002	0.2156	0.2277	0.1992	0.2193	0.1736	0.1736	0.2516	0.2137	0.2133	0.233	0.2752	0.2633	0.2486	0.2747	0.2722	0.2631	0.2484	0.199	0.2213	0.2015	0.2005	0.0339	29.289	0.3806	620	1230	1644	3612	1517	712	1241	1728	68.76	65.07	48.17	31.36	77.06
PGAL8A_00043100	4962	2232	44.98	PF3D7_0703000	conserved Plasmodium protein, unknown function		0.0981	0.4021	0.5117	0.017	0.3999	0.0748	0.3991	0.4001	0.354	0.358	0.4	0.3988	0.3895	0.393	0.3486	0.353	0.4962	0.4789	0.4687	0.4894	0.5084	0.4763	0.4657	0.3818	0.3822	0.3912	0.3992	0.0397	30.779	0.13656	551	228	419	448	606	1264	236	514	6.27	27.26	21.98	27.7	13.78
PGAL8A_00043200	534	435	81.46	PF3D7_0703100	conserved Plasmodium protein, unknown function		0.0225	0.0888	0.1159	0.0002	0.0958	0.0313	0.0889	0.1072	0.0994	0.1059	0.0988	0.0992	0.1203	0.1106	0.0997	0.1077	0.1229	0.1194	0.1188	0.1234	0.1166	0.1204	0.1199	0.146	0.1433	0.1415	0.1381	0.0159	26.781	0.03776	3389	3218	3308	3573	3454	3056	3217	3280	53.18	43.73	18.89	17.71	65.48
PGAL8A_00043300	3933	1839	46.76	PF3D7_0703200	conserved Plasmodium protein, unknown function		0.0624	0.2271	0.3139	0.0149	0.289	0.066	0.2299	0.2944	0.264	0.2522	0.2314	0.2306	0.3097	0.302	0.2675	0.2505	0.3092	0.2612	0.2532	0.3108	0.3161	0.2607	0.2524	0.3221	0.3103	0.2971	0.2876	0.0353	51.333	0.13524	1550	1109	1320	617	1255	1546	1080	1078	46.62	72.98	82.83	92.14	71.84
PGAL8A_00043400	420	219	52.14	PF3D7_0703300	conserved Plasmodium protein, unknown function		0.032	0.0879	0.0996	0.0054	0.1425	0.0132	0.0882	0.1323	0.1184	0.119	0.1013	0.0952	0.1701	0.1657	0.1403	0.1414	0.0922	0.0869	0.0872	0.094	0.1015	0.0882	0.0885	0.0791	0.0791	0.0862	0.0849	0.0003	11.144	0.0505	2946	3231	3500	2202	2860	3843	3225	2938	45.94	64.03	52.26	19.41	72.03
PGAL8A_00043500	2067	1107	53.56	PF3D7_0703400	conserved Plasmodium protein, unknown function		0.0705	0.2626	0.4334	0.0133	0.3667	0.0577	0.2596	0.3395	0.2359	0.2222	0.2565	0.2539	0.3417	0.3565	0.2292	0.2184	0.4222	0.3352	0.3168	0.4195	0.4382	0.3262	0.3124	0.3759	0.3575	0.3718	0.3573	0.0206	12.734	0.10296	1243	798	651	765	766	1842	828	785	63.51	51.46	33.98	39.07	25.26
PGAL8A_00043600	6195	3372	54.43	PF3D7_0703500	erythrocyte membrane-associated antigen		0.0143	0.0663	0.1018	0.0017	0.0898	0.0138	0.0662	0.0895	0.0695	0.0682	0.068	0.0674	0.0937	0.093	0.0716	0.0707	0.1037	0.0819	0.0804	0.1041	0.1022	0.0827	0.0816	0.0864	0.0866	0.0884	0.0883	0.0061	108.129	0.01522	3784	3609	3474	3337	3520	3825	3610	3505	93.44	95.33	91.07	83.75	77.08
PGAL8A_00043700	786	405	51.53	PF3D7_0703600	conserved Plasmodium protein, unknown function		0.0175	0.0835	0.1031	0.0228	0.0781	0.0091	0.1004	0.0889	0.1259	0.12	0.0725	0.0881	0.0803	0.0693	0.1159	0.1097	0.1076	0.1404	0.1264	0.1263	0.1218	0.1607	0.1461	0.1114	0.1054	0.1195	0.1133	0.0148	139.104	0.03774	3628	3320	3457	190	3673	3993	3012	3511	56.45	39.73	81.72	89.27	58.08
PGAL8A_00043800	609	360	59.11	PF3D7_0703700	conserved Plasmodium protein, unknown function		0.117	0.2769	0.2829	0.0341	0.2837	0.0344	0.2659	0.2854	0.3748	0.3677	0.2812	0.2619	0.2745	0.2792	0.3559	0.3635	0.2982	0.3772	0.3441	0.2757	0.2524	0.3576	0.3271	0.3398	0.3544	0.3207	0.3348	0.0366	92.796	0.12532	335	701	1565	47	1301	2890	782	1152	86.41	90.08	76.25	60.01	54.02
PGAL8A_00043900	2643	1005	38.02	PF3D7_0703800	conserved Plasmodium protein, unknown function		0.0968	0.3007	0.32	0.0309	0.2429	0.0664	0.2829	0.2554	0.2327	0.2277	0.3145	0.3109	0.2441	0.234	0.2234	0.226	0.3334	0.2799	0.2757	0.3265	0.3075	0.272	0.2668	0.2229	0.2252	0.2172	0.2147	0.0189	14.885	0.08378	573	555	1268	62	1702	1532	661	1442	27.86	14.5	19.32	11.98	10.14
PGAL8A_00044000	11358	4581	40.33	PF3D7_0703900	conserved Plasmodium membrane protein, unknown function		0.1067	0.3386	0.5093	0.0183	0.43	0.0871	0.3352	0.4246	0.3396	0.3284	0.3307	0.3246	0.4081	0.4153	0.3271	0.3216	0.4875	0.4196	0.414	0.4825	0.5114	0.4113	0.4044	0.4573	0.4538	0.4879	0.4797	0.0262	20.89	0.11702	444	402	427	372	492	960	411	441	77.83	76.22	25.19	23.2	22.88
PGAL8A_00044100	8685	3738	43.04	PF3D7_0704000	conserved Plasmodium membrane protein, unknown function		0.0714	0.2823	0.5112	0.0214	0.3581	0.0804	0.2875	0.3333	0.2529	0.2447	0.2955	0.2994	0.3415	0.3713	0.2718	0.2623	0.4578	0.3623	0.3619	0.4633	0.517	0.3759	0.3762	0.3644	0.3597	0.3715	0.366	0.0158	23.342	0.1037	1212	657	422	234	809	1105	638	818	55.6	48.97	27.54	23.2	21.5
PGAL8A_00044200	10095	2220	21.99	PF3D7_0704100	conserved Plasmodium membrane protein, unknown function		0.1361	0.5681	0.8801	0.0371	0.7013	0.1291	0.5719	0.6481	0.5169	0.4883	0.6004	0.59	0.6059	0.647	0.4948	0.484	0.8582	0.7166	0.7115	0.865	0.8822	0.6972	0.6865	0.6872	0.6824	0.7288	0.7037	0.0398	84.315	0.15064	190	59	48	32	94	328	58	96	29.7	20.93	56.78	82.46	49.82
PGAL8A_00044300	3144	1980	62.98	PF3D7_0704200	tRNA m5C-methyltransferase, putative		0.0487	0.1408	0.2004	0.0062	0.1853	0.0241	0.1408	0.1854	0.163	0.165	0.142	0.146	0.1905	0.1947	0.1626	0.1659	0.1933	0.1756	0.1774	0.1947	0.2033	0.1789	0.1807	0.1792	0.1809	0.1742	0.176	0.0073	19.336	0.04534	2148	2331	2353	2001	2335	3384	2330	2234	57.42	65.24	30.41	24.04	11.08
PGAL8A_00044400	6858	1125	16.4	PF3D7_0704300	conserved Plasmodium membrane protein, unknown function		0.245	0.8195	0.9202	0.0399	0.9184	0.1865	0.8285	0.9877	0.9505	0.9228	0.707	0.6932	0.848	0.7844	0.9114	0.9353	0.8987	0.8143	0.8157	0.9241	0.9278	0.826	0.8159	0.8936	0.8794	0.9616	0.9443	0.0603	134.527	0.22192	35	12	39	23	27	65	11	17	25.45	35.35	65.15	74.62	38.36
PGAL8A_00044500	2448	1524	62.25	PF3D7_0704400	phosphoinositide-binding protein, putative		0.0513	0.1385	0.1964	0.0077	0.1755	0.0473	0.1407	0.1734	0.1654	0.1586	0.1473	0.1495	0.1797	0.1842	0.1786	0.1689	0.1978	0.1544	0.15	0.1971	0.1955	0.1541	0.1496	0.1927	0.1914	0.201	0.195	0.0183	50.46	0.0424	2028	2372	2382	1669	2454	2280	2333	2401	38.15	40.96	61.59	69.1	24.13
PGAL8A_00044600	3549	1329	37.45	PF3D7_0704500	serine/threonine protein kinase, putative		0.1101	0.2916	0.367	0.0195	0.3304	0.0963	0.2948	0.3236	0.2983	0.2945	0.3049	0.304	0.3315	0.3476	0.2938	0.2889	0.3803	0.361	0.3518	0.3828	0.3686	0.3604	0.3526	0.3651	0.3578	0.3656	0.3506	0.0154	54.44	0.1156	401	609	987	316	969	757	589	881	24.94	16.36	72.1	81.72	38.67
PGAL8A_00044700	10077	4380	43.47	PF3D7_0704600	E3 ubiquitin-protein ligase	PfUT	0.0382	0.1612	0.2206	0.0096	0.198	0.0437	0.1631	0.1956	0.1811	0.179	0.1592	0.1605	0.1917	0.1954	0.1825	0.1783	0.2201	0.2255	0.2241	0.2232	0.2237	0.226	0.2246	0.2405	0.2401	0.2465	0.2425	0.0201	182.146	0.04414	2625	1976	2146	1279	2184	2449	1956	2098	88.09	87.54	81.05	82.67	72.48
PGAL8A_00044800	3837	1743	45.43	PF3D7_0704700	phosphopantetheine adenylyltransferase, putative		0.0917	0.2803	0.3724	0.0092	0.3394	0.063	0.2818	0.3393	0.2728	0.2675	0.2727	0.2784	0.3333	0.336	0.2849	0.2798	0.3769	0.3385	0.3322	0.3767	0.3732	0.3441	0.3378	0.3203	0.3215	0.3183	0.3224	0.0123	29.237	0.10298	675	676	950	1357	917	1639	668	786	54.25	47.14	42.29	56.48	14.07
PGAL8A_00044900	4026	1641	40.76	PF3D7_0704800	conserved Plasmodium protein, unknown function		0.079	0.2571	0.3472	0.0088	0.3584	0.0791	0.2557	0.3517	0.3147	0.3141	0.2403	0.2441	0.3358	0.3412	0.3046	0.2991	0.3253	0.3195	0.3148	0.337	0.3564	0.323	0.3198	0.4106	0.4085	0.4233	0.4156	0.0201	83.182	0.08268	979	845	1091	1438	807	1146	852	724	27.64	28.67	70.54	87.71	22.3
PGAL8A_00045000	1029	873	84.84	PF3D7_0704900	peptide chain release factor 2	RF2Api	0.0216	0.0785	0.1014	0.0041	0.079	0.0173	0.0797	0.0784	0.09	0.0863	0.0822	0.0842	0.0746	0.0731	0.0795	0.0758	0.0979	0.0947	0.0942	0.0993	0.103	0.0968	0.0964	0.0925	0.0887	0.1003	0.0964	0.0028	15.771	0.02064	3433	3391	3479	2624	3661	3665	3376	3650	28.37	43.14	44.18	45.14	44.61
PGAL8A_00045100	3090	1548	50.1	PF3D7_0705000	mRNA cap guanine-N7 methyltransferase, putative		0.0465	0.119	0.1727	0.006	0.1721	0.0255	0.1158	0.1658	0.1306	0.1312	0.1197	0.1154	0.1384	0.1438	0.1287	0.1287	0.1644	0.1369	0.1313	0.1652	0.1739	0.1349	0.1292	0.1706	0.1705	0.1767	0.1755	0.0116	41.601	0.0467	2254	2689	2646	2051	2504	3321	2746	2496	80.16	68.13	55.79	40.26	35.69
PGAL8A_00045200	2271	867	38.18	PF3D7_0705100	conserved Plasmodium protein, unknown function		0.1451	0.2828	0.4214	0.0092	0.4959	0.1161	0.2886	0.4272	0.3626	0.3525	0.2938	0.3015	0.4332	0.4692	0.3417	0.3352	0.3778	0.3361	0.3345	0.3811	0.4231	0.3434	0.3405	0.4373	0.4364	0.5226	0.5119	0.0312	38.394	0.11522	158	654	710	1357	336	475	630	435	22.94	16.19	53.44	65.03	35.4
PGAL8A_00045300	3711	1263	34.03	PF3D7_0705200	conserved Plasmodium protein, unknown function		0.133	0.3963	0.6953	0.011	0.5619	0.1158	0.3955	0.5078	0.4545	0.4366	0.3806	0.4009	0.5133	0.5942	0.4512	0.431	0.6551	0.464	0.4472	0.6665	0.7003	0.4643	0.4466	0.6238	0.5976	0.6534	0.6222	0.0297	4.721	0.13096	206	243	141	1046	221	483	244	241	6.8	30.6	15.48	20.48	18.83
PGAL8A_00045400	2319	1350	58.21	PF3D7_0705300	origin recognition complex subunit 2, putative		0.0411	0.0995	0.1144	0.0035	0.1058	0.029	0.1022	0.1036	0.1165	0.1199	0.0968	0.0994	0.1122	0.1111	0.1201	0.1207	0.1073	0.1266	0.1253	0.1069	0.1138	0.1262	0.1251	0.1257	0.1235	0.1269	0.1259	0.0106	128.031	0.02858	2503	3028	3323	2791	3336	3160	2973	3323	30.32	41.11	66.33	73.57	34.5
PGAL8A_00045500	2469	2217	89.79	PF3D7_0705400	DNA replication licensing factor MCM7	PfMCM7	0.0115	0.0356	0.0352	0.001	0.0301	0.0054	0.0361	0.0301	0.0325	0.0317	0.0356	0.0361	0.0304	0.03	0.0359	0.0345	0.0354	0.0419	0.0412	0.0367	0.0364	0.0412	0.0406	0.0349	0.0316	0.0336	0.0302	0.0048	211.655	0.0082	3899	4004	4071	3496	4119	4114	3997	4119	49.98	52.88	92.57	90.79	59.41
PGAL8A_00045600	7200	2922	40.58	PF3D7_0705500	inositol-phosphate phosphatase, putative		0.0554	0.1592	0.1829	0.0112	0.1626	0.0424	0.1567	0.1592	0.1839	0.1846	0.1527	0.1494	0.1676	0.1667	0.1896	0.1926	0.1938	0.1986	0.1981	0.1884	0.1814	0.1933	0.1925	0.1992	0.1959	0.201	0.1994	0.0139	139.803	0.04288	1856	2009	2532	1007	2619	2497	2066	2582	89.39	77.79	80.44	84.46	51.45
PGAL8A_00045700	3078	1551	50.39	PF3D7_0705600	RNA helicase, putative		0.0485	0.1608	0.2659	0.0062	0.245	0.0604	0.1585	0.2203	0.173	0.1656	0.1525	0.1501	0.2283	0.2546	0.1688	0.1609	0.2555	0.1911	0.1865	0.2506	0.2609	0.19	0.1858	0.2126	0.2064	0.2314	0.2313	0.0148	15.996	0.0686	2158	1985	1714	2001	1662	1742	2032	1820	60.31	53.82	26.8	18.61	9.66
PGAL8A_00045800	165	162	98.18	PF3D7_0705700	40S ribosomal protein S29, putative		0.0001	0.0155	0.0193	0	0.0208	0.0002	0.0155	0.0207	0.0178	0.0154	0.0158	0.0158	0.0201	0.0206	0.0195	0.0193	0.0192	0.0154	0.0153	0.0192	0.0193	0.0154	0.0153	0.0043	0.0045	0.0033	0.0062	0.0001	95.494	0.0008	4280	4194	4189	3943	4183	4260	4195	4191	98.81	98.3	98.13	96.69	97.8
PGAL8A_00046000	264	216	81.82	PF3D7_0705900	ATP synthase subunit C, putative		0.0113	0.0349	0.0455	0.0129	0.0391	0.0074	0.041	0.045	0.0288	0.0289	0.0353	0.0484	0.0403	0.0344	0.0354	0.0358	0.0526	0.0438	0.0435	0.0528	0.0455	0.0436	0.0434	0.049	0.0489	0.0419	0.0419	0.0001	117.669	0.13986	3907	4013	3998	799	4049	4048	3936	3995	82.26	82.22	96.87	97.89	99.12
PGAL8A_00046100	3561	2697	75.74	PF3D7_0706000	importin-7, putative		0.0292	0.0805	0.1249	0.0018	0.1127	0.0286	0.0798	0.1009	0.1129	0.1126	0.0767	0.0758	0.1091	0.1167	0.1099	0.1097	0.1215	0.1228	0.1232	0.1203	0.1247	0.1213	0.1218	0.1342	0.1355	0.1423	0.1445	0.0063	108.516	0.0143	3081	3361	3188	3312	3251	3178	3375	3356	85.48	79.78	82.26	80.3	56.95
PGAL8A_00046200	4596	2322	50.52	PF3D7_0706100	conserved Plasmodium protein, unknown function		0.0752	0.2271	0.3363	0.0099	0.3203	0.0725	0.2313	0.2925	0.2649	0.2569	0.2216	0.2234	0.2781	0.306	0.2663	0.2552	0.3237	0.3219	0.3044	0.3254	0.3398	0.321	0.3032	0.3368	0.3253	0.371	0.3545	0.0189	17.422	0.05518	1106	1109	1156	1208	1040	1343	1066	1086	24.6	47.53	56.43	65.15	19.12
PGAL8A_00046300	249	90	36.14	PF3D7_0706200	conserved Plasmodium protein, unknown function		0.1097	0.1585	0.3568	0.0126	0.2411	0.0585	0.1755	0.2574	0.1462	0.1647	0.2299	0.2487	0.1927	0.2398	0.1637	0.1459	0.3383	0.1794	0.16	0.3223	0.3347	0.1803	0.1622	0.2315	0.2318	0.2178	0.2404	0.0128	11.247	0.12216	406	2023	1042	835	1725	1819	1762	1421	37.77	48.33	57.37	36.91	87.71
PGAL8A_00046500	279	276	98.92	PF3D7_0706400	60S ribosomal protein L37		0.0127	0.0175	0.018	0.0001	0.0141	0.005	0.0203	0.0183	0.0347	0.039	0.032	0.032	0.0237	0.0299	0.0501	0.0548	0.0192	0.0262	0.0306	0.0192	0.018	0.0263	0.0306	0.0289	0.0342	0.0246	0.0298	0.0086	437.928	0.0075	3849	4175	4202	3612	4235	4126	4154	4207	98.17	97.4	95.45	89.32	96.36
PGAL8A_00046600	4755	588	12.37	PF3D7_0706500	conserved Plasmodium protein, unknown function		0.0774	0.1781	0.212	0.0019	0.2043	0.072	0.1771	0.1586	0.2008	0.2047	0.1714	0.1707	0.1624	0.2121	0.2152	0.21	0.1664	0.2008	0.212	0.1704	0.216	0.206	0.2172	0.1748	0.1757	0.2043	0.2001	0.0136	130.041	0.03072	1038	1722	2226	3277	2109	1361	1733	2593	93.21	89.06	75.66	71.11	53.54
PGAL8A_00046700	1728	639	36.98	PF3D7_0706600	conserved Plasmodium protein, unknown function		0.1665	0.6909	1.3716	0.0298	0.8621	0.1559	0.6191	0.5987	0.6229	0.6347	0.6595	0.6293	0.6424	0.9229	0.6718	0.6662	1.0719	0.7364	0.7259	0.8898	1.0856	0.7435	0.7286	0.9365	1.043	1.1391	1.1276	0.0381	2.026	0.34564	100	29	7	71	37	153	37	136	11.32	40.4	14.87	5.14	28.91
PGAL8A_00047300	5112	1437	28.11	PF3D7_0707200	conserved Plasmodium protein, unknown function		0.1068	0.3632	0.6556	0.0286	0.466	0.1291	0.3591	0.4384	0.3756	0.3606	0.3538	0.3503	0.5057	0.5426	0.3687	0.3617	0.6203	0.4351	0.4334	0.6243	0.6474	0.4265	0.4253	0.6118	0.5984	0.6077	0.5938	0.0201	35.884	0.12384	443	319	185	83	398	328	339	398	20.01	28.35	55.65	62.19	27.06
PGAL8A_00047400	2139	339	15.85	PF3D7_0707300	rhoptry-associated membrane antigen		0.2143	0.5271	0.5042	0.0206	0.5975	0.0605	0.5262	0.6002	0.8167	0.828	0.4103	0.422	0.5285	0.4991	0.8901	0.9495	0.5234	0.7271	0.7757	0.5179	0.4841	0.6907	0.7853	0.7462	0.7436	0.7056	0.7693	0.0574	320.855	0.15676	51	81	434	271	181	1737	79	134	62.26	38.1	96.12	98.15	77.48
PGAL8A_00047500	1863	1494	80.19	PF3D7_0707400	AAA family ATPase, putative		0.0095	0.0669	0.1004	0.0054	0.0652	0.0118	0.0664	0.0621	0.0583	0.0542	0.066	0.0652	0.0613	0.0615	0.0571	0.0532	0.0922	0.0844	0.0801	0.0915	0.0983	0.0845	0.0802	0.0638	0.0598	0.073	0.0699	0.0039	46.827	0.01268	3964	3597	3491	2202	3794	3902	3608	3819	48.43	82.38	66.61	48.75	45.9
PGAL8A_00047600	3870	1155	29.84	PF3D7_0707500	conserved Plasmodium protein, unknown function		0.1306	0.2801	0.4562	0.0134	0.5034	0.1177	0.2839	0.464	0.4316	0.4213	0.2947	0.3015	0.4914	0.4978	0.4362	0.4246	0.449	0.408	0.4067	0.4605	0.4695	0.4111	0.4115	0.4393	0.4415	0.4791	0.4826	0.0145	7.395	0.11508	219	679	564	757	326	451	656	325	50.13	41.73	24.89	20.91	11.46
PGAL8A_00047700	705	330	46.81	PF3D7_0707600	conserved Plasmodium protein, unknown function		0.04	0.1942	0.3676	0.0037	0.2984	0.0558	0.186	0.2593	0.1866	0.1802	0.1764	0.1686	0.289	0.3111	0.1885	0.1825	0.3236	0.2637	0.2556	0.3342	0.3813	0.2549	0.2469	0.2581	0.2508	0.2548	0.2484	0.0039	61.626	0.03202	2541	1485	983	2737	1191	1929	1596	1396	66.51	57.3	41.39	41.04	84.47
PGAL8A_00047800	2166	879	40.58	PF3D7_0707700	E3 ubiquitin-protein ligase, putative		0.0183	0.0697	0.1226	0.0002	0.1151	0.0323	0.0697	0.1116	0.0899	0.0857	0.074	0.0738	0.1012	0.1071	0.082	0.0775	0.1111	0.1127	0.1071	0.1105	0.1221	0.1124	0.107	0.1257	0.1219	0.1209	0.1222	0.0075	119.918	0.01112	3594	3551	3211	3573	3219	3007	3551	3242	89.11	88.51	86.34	90.6	86.67
PGAL8A_00047900	3360	1533	45.63	PF3D7_0707800	RAP protein, putative		0.0481	0.1899	0.3786	0.0063	0.3367	0.1033	0.1908	0.3095	0.2462	0.2373	0.1798	0.1805	0.2923	0.3113	0.2418	0.23	0.3552	0.2631	0.2511	0.3565	0.3781	0.2619	0.25	0.3471	0.3385	0.3527	0.3491	0.0143	16.04	0.06632	2182	1543	920	1967	933	665	1537	984	29.2	50.28	59.2	56.55	39.19
PGAL8A_00048000	780	729	93.46	PF3D7_0707900	ribosomal protein S8e, putative		0.0063	0.0353	0.0652	0.0002	0.0542	0.0108	0.0351	0.0525	0.0438	0.0434	0.0389	0.0387	0.0546	0.0571	0.0401	0.0398	0.0605	0.0595	0.0555	0.0603	0.0651	0.0593	0.0553	0.048	0.0456	0.0537	0.0518	0.005	51.475	0.00628	4088	4007	3831	3573	3909	3933	4006	3918	83.38	84.92	69.03	54.28	76.47
PGAL8A_00048100	2397	1380	57.57	PF3D7_0708000	cytoskeleton associated protein, putative		0.0728	0.1796	0.3012	0.0083	0.3344	0.0759	0.1746	0.3108	0.2217	0.2141	0.1803	0.1775	0.3013	0.3266	0.2122	0.2149	0.2768	0.2149	0.2095	0.2721	0.2981	0.2173	0.2093	0.333	0.3211	0.3577	0.3545	0.0203	13.022	0.0725	1172	1696	1425	1544	942	1234	1779	977	45.73	59.89	51.5	41.91	41.06
PGAL8A_00048300	210	204	97.14	PF3D7_0708100	DNA-directed RNA polymerases I, II, and III subunit RPABC5, putative		0.0123	0.0369	0.0314	0	0.0456	0.0006	0.0372	0.046	0.0433	0.0433	0.0301	0.0301	0.0451	0.0458	0.0489	0.0489	0.0315	0.0364	0.0363	0.0315	0.0314	0.0365	0.0365	0.0266	0.0266	0.0262	0.0262	0	29.443	0.0018	3864	3989	4112	3943	3985	4224	3985	3984	90.5	89.65	82.57	51.61	90.79
PGAL8A_00048400	2568	1347	52.45	PF3D7_0708200	conserved Plasmodium protein, unknown function		0.0487	0.2195	0.3394	0.0136	0.3057	0.0691	0.2249	0.277	0.2106	0.1986	0.2266	0.2331	0.2538	0.2826	0.1996	0.191	0.3071	0.276	0.2749	0.3071	0.336	0.2757	0.2775	0.3008	0.3052	0.3114	0.316	0.0188	27.974	0.0599	2148	1194	1139	736	1139	1446	1142	1224	35.8	23.32	11.22	5.14	27.92
PGAL8A_00048500	702	648	92.31	PF3D7_0708300	EKC/KEOPS complex subunit BUD32		0.0321	0.0965	0.1375	0.0074	0.104	0.0191	0.0938	0.0993	0.0988	0.0938	0.107	0.1069	0.0953	0.1017	0.0832	0.0809	0.1293	0.1331	0.1325	0.1264	0.1344	0.1327	0.132	0.1173	0.1171	0.1188	0.1171	0.0058	45.563	0.05096	2943	3084	3044	1732	3355	3600	3136	3380	71.16	48.9	28.18	5.14	77.94
PGAL8A_00048600	2196	1911	87.02	PF3D7_0708400	heat shock protein 90	HSP86	0.005	0.0105	0.0095	0.0001	0.0136	0.0033	0.0106	0.0149	0.016	0.0166	0.0094	0.0095	0.0147	0.0131	0.015	0.0156	0.0105	0.0144	0.0137	0.0104	0.0094	0.0145	0.0138	0.0127	0.0121	0.0134	0.0127	0.002	11476	0.00262	4127	4232	4250	3612	4239	4174	4230	4223	98.15	99.26	98.51	95.71	89.99
PGAL8A_00048700	2526	678	26.84	PF3D7_0708500	heat shock protein 86 family protein		0.0471	0.0964	0.1488	0	0.1616	0.0439	0.0963	0.145	0.129	0.1345	0.1013	0.1012	0.1553	0.1822	0.1309	0.1426	0.1308	0.1302	0.1293	0.1308	0.1488	0.1303	0.1293	0.1471	0.1462	0.1617	0.1615	0.0242	59.537	0.03142	2226	3086	2918	3943	2631	2434	3085	2769	73.79	79.07	52.48	46.24	59.32
PGAL8A_00048800	768	360	46.88	PF3D7_0708600	inner membrane complex protein 1d, putative		0.0314	0.1136	0.2133	0.0177	0.1994	0.0447	0.1246	0.2004	0.146	0.1353	0.117	0.1277	0.1881	0.1873	0.1367	0.1266	0.21	0.1691	0.158	0.2117	0.226	0.188	0.1763	0.1697	0.1691	0.1808	0.1801	0.0068	24.818	0.27402	2971	2775	2212	399	2164	2388	2588	2047	25.93	23.97	14.49	15.47	57.69
PGAL8A_00048900	678	522	76.99	PF3D7_0708700	Cg8 protein		0.0187	0.0717	0.0776	0	0.0874	0.0283	0.0718	0.0889	0.0813	0.0782	0.0691	0.0691	0.0823	0.0808	0.0802	0.0774	0.0845	0.0762	0.0749	0.0842	0.0773	0.0759	0.0746	0.0893	0.0856	0.0805	0.0768	0.0119	266.578	0.04114	3569	3508	3731	3943	3558	3195	3509	3511	63.82	71.25	91.36	87.31	89.01
PGAL8A_00049000	2598	1965	75.64	PF3D7_0708800	heat shock protein 110	HSP70-z	0.0126	0.0525	0.1325	0.0029	0.1304	0.0352	0.0506	0.132	0.126	0.1231	0.057	0.0551	0.1313	0.1299	0.1311	0.1266	0.1308	0.1379	0.1342	0.1336	0.1354	0.138	0.1347	0.1537	0.1487	0.1547	0.151	0.0072	763.401	0.0118	3852	3798	3097	2972	3029	2853	3820	2945	95.88	95.12	91.54	81.27	80.79
PGAL8A_00049100	879	558	63.48	PF3D7_0708900	Cg3 protein // protein SCO1, putative		0.0344	0.1276	0.2085	0.0021	0.2106	0.0531	0.1268	0.1938	0.1412	0.1384	0.1245	0.1231	0.177	0.1953	0.1247	0.1219	0.1815	0.1412	0.1429	0.1771	0.2044	0.1373	0.139	0.1877	0.1861	0.2012	0.2041	0.0108	34.097	0.0257	2835	2537	2267	3213	2047	2035	2553	2122	75.21	47.24	43.41	40.31	67.75
PGAL8A_00049200	1275	957	75.06	PF3D7_0709000	chloroquine resistance transporter		0.0719	0.1402	0.1139	0.0041	0.1659	0.0365	0.1422	0.1609	0.2044	0.2113	0.1727	0.1751	0.1829	0.1863	0.2155	0.2212	0.1177	0.1897	0.1852	0.1203	0.1124	0.1909	0.1874	0.1659	0.1651	0.1632	0.1635	0.0111	45.723	0.05182	1195	2342	3329	2624	2574	2779	2305	2566	94.34	92.73	80.54	67.61	77.34
PGAL8A_00049300	2841	1734	61.03	PF3D7_0709100	Cg1 protein		0.0513	0.1581	0.2577	0.0083	0.2214	0.0595	0.1595	0.2235	0.2096	0.2082	0.1654	0.1665	0.2176	0.2164	0.1996	0.1978	0.2524	0.248	0.241	0.253	0.2572	0.2548	0.2467	0.287	0.2864	0.2789	0.286	0.0257	74.038	0.05612	2028	2030	1790	1544	1925	1785	2013	1777	53.38	58.11	93.68	91.26	69.85
PGAL8A_00049400	888	453	51.01	PF3D7_0709200	glutaredoxin-like protein // Cg6 protein		0.1048	0.3136	0.5403	0.0211	0.3739	0.0961	0.3109	0.3798	0.2889	0.2803	0.3256	0.3188	0.3799	0.381	0.3011	0.2922	0.462	0.4119	0.44	0.4388	0.5055	0.4042	0.4315	0.3577	0.3864	0.3966	0.4192	0.025	80.862	0.171	464	497	345	252	728	763	516	584	61.1	45.06	47.97	41.25	56.36
PGAL8A_00049500	7554	2868	37.97	PF3D7_0709300	Cg2 protein		0.0789	0.2553	0.4535	0.0154	0.398	0.1226	0.2557	0.3549	0.3138	0.2964	0.2536	0.2548	0.3509	0.4006	0.3122	0.2956	0.4229	0.378	0.3683	0.4255	0.4495	0.3734	0.3609	0.4268	0.4147	0.4802	0.4746	0.0343	60.106	0.09796	982	858	574	572	618	401	852	704	57.38	59.23	41.27	44.76	24.77
PGAL8A_00049600	3015	1305	43.28	PF3D7_0709400	Cg7 protein		0.0608	0.2462	0.473	0.0064	0.3505	0.0775	0.2444	0.3319	0.2752	0.2619	0.2253	0.2263	0.3205	0.3459	0.2823	0.2656	0.4299	0.3232	0.3002	0.4336	0.4762	0.3292	0.3061	0.3996	0.3924	0.3988	0.4029	0.016	50.841	0.06184	1619	925	509	1943	847	1187	945	830	22.4	40.06	63.63	64.64	38.31
PGAL8A_00049700	402	255	63.43	PF3D7_0709500	conserved Plasmodium protein, unknown function		0.0649	0.1881	0.2971	0	0.28	0.1216	0.1884	0.2733	0.2277	0.2255	0.2002	0.2006	0.2717	0.3058	0.2336	0.2272	0.2589	0.216	0.2436	0.2548	0.2972	0.2165	0.2442	0.28	0.2668	0.3498	0.3338	0.0244	30.174	0.07064	1453	1569	1463	3943	1326	412	1567	1270	41.92	35.76	54.3	46.84	73.39
PGAL8A_00049800	3549	1866	52.58	PF3D7_0709600	ribonucleases P/MRP protein subunit POP1, putative		0.0687	0.1604	0.2443	0.0076	0.229	0.0676	0.1606	0.2172	0.1973	0.2023	0.1528	0.1543	0.2168	0.229	0.2054	0.2089	0.2393	0.1967	0.2026	0.2386	0.2448	0.1958	0.2018	0.2423	0.2437	0.2589	0.2607	0.0236	24.269	0.07022	1289	1992	1907	1690	1838	1492	1991	1850	67.99	73.71	33.39	31	26.43
PGAL8A_00049900	1080	918	85	PF3D7_0709700	prodrug activation and resistance esterase		0.1908	0.2294	0.2501	0.0128	0.3008	0.0729	0.2356	0.2805	0.2934	0.2855	0.1746	0.1794	0.1845	0.2083	0.2507	0.2341	0.2044	0.2572	0.2648	0.204	0.2523	0.2514	0.2606	0.2336	0.233	0.2647	0.2553	0.0368	321.265	0.06874	67	1085	1852	811	1169	1328	1022	1192	61.17	70.39	88.18	95.26	88.82
PGAL8A_00050000	195	189	96.92	PF3D7_0709800	conserved protein, unknown function		0.0285	0.0913	0.1634	0	0.1106	0.0333	0.0913	0.1027	0.1108	0.1194	0.123	0.123	0.1301	0.1367	0.1357	0.1442	0.1417	0.1519	0.1606	0.1417	0.1634	0.1519	0.1606	0.1342	0.146	0.1342	0.1444	0.0066	29.65	0.01504	3111	3174	2753	3943	3280	2949	3175	3333	58.63	43.02	40.64	28.88	71.33
PGAL8A_00050100	6078	2547	41.91	PF3D7_0709900	conserved protein, unknown function		0.037	0.1093	0.1605	0.0073	0.1409	0.048	0.109	0.1252	0.1396	0.141	0.1169	0.1159	0.1332	0.151	0.1348	0.1364	0.1463	0.152	0.1532	0.1481	0.1628	0.1501	0.1516	0.1658	0.1651	0.175	0.1734	0.0155	49.739	0.03616	2695	2838	2791	1749	2880	2252	2849	3035	33.11	9.5	30.28	47.83	19.51
PGAL8A_00050200	8922	3168	35.51	PF3D7_0710000	conserved Plasmodium protein, unknown function		0.1081	0.3809	0.6858	0.0103	0.6314	0.1567	0.3777	0.5726	0.4395	0.4428	0.3795	0.373	0.5743	0.6446	0.476	0.4813	0.6078	0.4783	0.4953	0.6118	0.698	0.4814	0.4922	0.6436	0.6485	0.6964	0.7115	0.0555	34.387	0.12394	426	276	154	1142	146	147	279	158	37.32	35.17	64.88	78.43	32.3
PGAL8A_00050300	1311	513	39.13	PF3D7_0710100	conserved Plasmodium protein, unknown function		0.0616	0.2384	0.316	0.0096	0.2842	0.1033	0.2462	0.2493	0.2095	0.2409	0.2575	0.2623	0.2504	0.2926	0.1997	0.2239	0.3121	0.2721	0.2703	0.3227	0.3254	0.2792	0.2706	0.2943	0.3074	0.3282	0.339	0.0462	27.71	0.05066	1581	1000	1302	1279	1298	665	927	1502	61.85	50.53	46.48	43.26	22.57
PGAL8A_00050400	5373	1596	29.7	PF3D7_0710200	conserved Plasmodium protein, unknown function		0.1402	0.5324	1.0751	0.0089	0.9153	0.2705	0.5269	0.6892	0.505	0.4996	0.5114	0.5198	0.7277	0.9488	0.5216	0.502	0.8571	0.7255	0.632	0.8781	1.1136	0.7411	0.6382	0.6919	0.6282	0.7346	0.6952	0.0615	55.046	0.1395	176	76	19	1417	28	6	78	76	35.99	63.11	49.18	75.82	49.14
PGAL8A_00050500	1053	420	39.89	PF3D7_0710400	DNA repair protein RAD14, putative	XPA	0.0551	0.1445	0.2536	0.0054	0.2474	0.1028	0.1458	0.2071	0.2208	0.2126	0.1508	0.1499	0.2385	0.2896	0.252	0.2394	0.2208	0.2471	0.236	0.223	0.2477	0.2423	0.2316	0.308	0.3067	0.2762	0.2812	0.0229	17.115	0.06026	1866	2256	1821	2202	1641	675	2235	1971	53.23	60.45	35.05	36.05	53.37
PGAL8A_00050600	750	378	50.4	PF3D7_0710500	conserved Plasmodium protein, unknown function		0.0031	0.0412	0.0922	0	0.0885	0.0248	0.0414	0.0944	0.0845	0.0893	0.0378	0.0379	0.0966	0.0918	0.0879	0.0928	0.0984	0.1049	0.1097	0.0985	0.0923	0.1043	0.1092	0.1413	0.1487	0.1418	0.1501	0.0104	9.859	0.01198	4184	3936	3583	3943	3540	3355	3930	3446	48.55	58.54	42.77	32.14	81.98
PGAL8A_00050700	441	270	61.22	PF3D7_0710600	60S ribosomal protein L34		0.0086	0.0404	0.027	0.0043	0.0438	0.0205	0.0403	0.0378	0.036	0.036	0.0359	0.0358	0.0318	0.0391	0.0323	0.032	0.0262	0.0368	0.0366	0.0262	0.0269	0.0368	0.0366	0.0359	0.0358	0.0263	0.0263	0.0002	133.98	0.0436	4000	3948	4141	2565	3997	3547	3948	4057	97.87	98.65	97.51	95.69	98.37
PGAL8A_00050800	630	72	11.43	PF3D7_0710700	conserved Plasmodium protein, unknown function		0.1266	0.275	0.6137	0.0001	0.2944	0.0333	0.2637	0.2699	0.4096	0.4478	0.2935	0.2798	0.3391	0.341	0.406	0.4442	0.6312	0.3214	0.3586	0.6275	0.6158	0.315	0.3518	0.7455	0.5952	0.705	0.5785	0.0329	29.705	0.07194	248	714	233	3612	1218	2949	794	1301	86.78	87.1	65	39.34	46.77
PGAL8A_00050900	1167	309	26.48	PF3D7_0710800	conserved Plasmodium protein, unknown function		0.0615	0.1721	0.1824	0.0082	0.1981	0.0501	0.1677	0.1634	0.1798	0.1765	0.1603	0.1577	0.1618	0.1854	0.2066	0.2068	0.1624	0.2082	0.208	0.1588	0.1788	0.2048	0.2045	0.2459	0.2376	0.259	0.2511	0.0078	34.385	0.08228	1586	1811	2537	1567	2181	2155	1876	2535	69.02	61.49	60.53	51.01	48.26
PGAL8A_00051000	1059	726	68.56	PF3D7_0710900	50S ribosomal protein L1, mitochondrial, putative		0.0239	0.1073	0.2342	0.0096	0.2027	0.0562	0.1133	0.1903	0.1425	0.1302	0.1074	0.1136	0.1741	0.1803	0.143	0.1307	0.234	0.1606	0.1472	0.2335	0.234	0.1604	0.1496	0.234	0.2244	0.2304	0.2211	0.0132	39.095	0.0776	3325	2874	2012	1279	2126	1908	2786	2167	59.72	48.61	38.68	34.52	29.24
PGAL8A_00051200	456	327	71.71	PF3D7_0711100	conserved Plasmodium membrane protein, unknown function		0.1102	0.1829	0.2112	0.008	0.3446	0.2055	0.1819	0.3753	0.3821	0.3863	0.1265	0.126	0.3754	0.2797	0.307	0.3057	0.2883	0.2905	0.2886	0.2933	0.2033	0.2891	0.2872	0.4565	0.4594	0.3824	0.3819	0.0038	6.193	0.17998	400	1646	2238	1601	885	36	1664	603	76.44	54.16	28.53	41.55	49.18
PGAL8A_00051300	2562	1305	50.94	PF3D7_0711200	conserved Plasmodium protein, unknown function		0.0738	0.2097	0.5269	0.0108	0.5623	0.1467	0.2202	0.4614	0.2348	0.2242	0.2193	0.2283	0.4844	0.5649	0.2319	0.2273	0.4658	0.2559	0.2544	0.4721	0.5204	0.2602	0.2588	0.5165	0.5019	0.5889	0.6007	0.0306	23.259	0.09884	1141	1300	375	1072	220	187	1190	335	40.85	32.34	18.54	37.75	47.55
PGAL8A_00051500	2082	390	18.73	PF3D7_0711400	histone deacetylase complex subunit SAP18, putative		0.0301	0.1182	0.2113	0.0062	0.2173	0.0869	0.1108	0.2172	0.1592	0.1482	0.1336	0.1258	0.2205	0.2105	0.1692	0.1703	0.1893	0.1686	0.1745	0.1936	0.2158	0.168	0.1659	0.2613	0.2559	0.2499	0.248	0.0221	58.749	0.0428	3040	2705	2237	2001	1963	964	2829	1850	50.42	67.39	56.97	35.05	29.84
PGAL8A_00051600	2322	1305	56.2	PF3D7_0711500	regulator of chromosome condensation, putative		0.0597	0.1305	0.1798	0.0026	0.2081	0.0593	0.1291	0.1824	0.1713	0.1776	0.1172	0.117	0.1705	0.1881	0.1651	0.1722	0.1618	0.1561	0.1584	0.1626	0.1807	0.1569	0.1593	0.2023	0.211	0.2185	0.2326	0.0357	242.637	0.03792	1670	2475	2570	3074	2074	1792	2506	2273	66.04	82.57	78.09	59.75	54.06
PGAL8A_00051700	849	531	62.54	PF3D7_0808400	coatomer subunit epsilon, putative		0.0518	0.1661	0.2775	0.0065	0.245	0.0737	0.1631	0.2417	0.2305	0.2163	0.1738	0.1706	0.2405	0.261	0.2261	0.2044	0.3033	0.2153	0.2284	0.2985	0.2705	0.2128	0.2256	0.3414	0.3447	0.3182	0.3173	0.0318	23.664	0.04698	2006	1890	1610	1929	1662	1299	1956	1581	70.75	55.24	55.48	72.08	81.55
PGAL8A_00051800	729	471	64.61	PF3D7_0808300	ubiquitin regulatory protein, putative		0.0246	0.1035	0.125	0.0052	0.1126	0.043	0.1052	0.1143	0.1243	0.127	0.1114	0.1122	0.1335	0.1234	0.1412	0.1441	0.1159	0.1305	0.1334	0.1177	0.1272	0.1319	0.1348	0.099	0.102	0.1158	0.1193	0.0049	152.808	0.02874	3291	2947	3187	2292	3253	2470	2916	3205	71.23	59.72	85.93	88.19	87.99
PGAL8A_00051900	1581	1248	78.94	PF3D7_0808200	plasmepsin X		0.0653	0.1508	0.2129	0.002	0.1989	0.0722	0.152	0.1687	0.1845	0.1811	0.1594	0.1606	0.188	0.1959	0.1982	0.1925	0.1846	0.196	0.1934	0.1814	0.2093	0.1931	0.1907	0.2107	0.2114	0.2376	0.2358	0.0171	25.45	0.03136	1436	2159	2217	3240	2173	1353	2128	2465	38	28.39	70.94	81.2	42.89
PGAL8A_00052000	4008	1974	49.25	PF3D7_0808100	AP-3 complex subunit delta, putative		0.0737	0.2457	0.6125	0.0238	0.5642	0.1694	0.2642	0.5054	0.3205	0.3191	0.2333	0.2462	0.5148	0.5625	0.3253	0.3234	0.5453	0.3833	0.3814	0.545	0.5973	0.3859	0.3869	0.5986	0.5823	0.6141	0.6058	0.0444	9.26	0.09846	1146	931	236	165	217	102	789	246	30.14	52.07	44.83	48.29	22.42
PGAL8A_00052100	3141	1596	50.81	PF3D7_0808000	conserved Plasmodium protein, unknown function		0.0713	0.3075	0.604	0.0298	0.5572	0.1551	0.3192	0.4985	0.2794	0.2856	0.2998	0.3123	0.4815	0.5552	0.2704	0.2733	0.5423	0.3257	0.3323	0.5491	0.6107	0.3524	0.3516	0.4352	0.4437	0.4897	0.4956	0.0442	9.442	0.11082	1214	523	248	71	227	157	475	255	26.19	42.8	18.66	19.99	27.96
PGAL8A_00052200	1119	963	86.06	PF3D7_0807900	tyrosine--tRNA ligase		0.018	0.0598	0.0891	0.0036	0.0924	0.0319	0.0613	0.0769	0.0717	0.0732	0.0578	0.059	0.0794	0.093	0.0749	0.0725	0.0746	0.0858	0.0785	0.0778	0.0923	0.089	0.0821	0.0825	0.0907	0.0986	0.0995	0.0223	35.599	0.01856	3608	3701	3619	2762	3491	3024	3682	3667	93.68	93.09	91.38	92.89	69.05
PGAL8A_00052300	1281	735	57.38	PF3D7_0807800	26S proteasome regulatory subunit RPN10, putative		0.0096	0.0438	0.0942	0.0032	0.1109	0.0397	0.042	0.0976	0.0958	0.1124	0.0463	0.0446	0.092	0.1048	0.0914	0.1068	0.082	0.106	0.1246	0.0803	0.0925	0.1042	0.1231	0.1612	0.178	0.1669	0.1793	0.0297	401.687	0.01362	3960	3907	3560	2874	3276	2618	3925	3405	92.45	84.47	89.74	89.46	71.8
PGAL8A_00052500	3327	1083	32.55	PF3D7_0807600	conserved Plasmodium protein, unknown function		0.052	0.2648	0.513	0.0206	0.3728	0.1084	0.2769	0.3554	0.299	0.2914	0.2588	0.2698	0.3635	0.3685	0.3049	0.2973	0.461	0.3669	0.3556	0.4648	0.5236	0.3683	0.3576	0.5064	0.4988	0.5441	0.5197	0.0519	207.462	0.06558	1995	787	412	271	734	594	700	703	91.47	88.56	82.12	72.15	55.5
PGAL8A_00052600	783	654	83.52	PF3D7_0807500	proteasome subunit alpha type-6, putative		0.0018	0.0383	0.0569	0.0018	0.0433	0.0176	0.0364	0.0482	0.0293	0.031	0.0364	0.0344	0.0458	0.0408	0.0279	0.0292	0.0616	0.0456	0.0435	0.059	0.0541	0.0434	0.0413	0.0524	0.0534	0.0496	0.0508	0.0019	737.649	0.02498	4223	3973	3908	3312	4003	3655	3994	3967	88.59	89.27	94.95	92.35	87.48
PGAL8A_00052700	570	495	86.84	PF3D7_0807400	coenzyme Q-binding protein COQ10 homolog, mitochondrial		0.0276	0.1262	0.4657	0.0089	0.4441	0.1073	0.1198	0.3432	0.29	0.2908	0.116	0.1096	0.319	0.4244	0.2713	0.265	0.3728	0.3111	0.3063	0.3616	0.4579	0.3014	0.2974	0.3961	0.4071	0.3926	0.4211	0.024	6.569	0.154	3145	2554	527	1417	461	614	2668	764	15.32	24.7	41.09	69.24	81.43
PGAL8A_00052800	606	540	89.11	PF3D7_0807300	ras-related protein Rab-18		0.0179	0.0197	0.0133	0.0022	0.0295	0.008	0.0167	0.0229	0.0348	0.0335	0.0181	0.0143	0.015	0.0224	0.0267	0.0255	0.0179	0.0187	0.0227	0.0143	0.0168	0.0213	0.0212	0.0268	0.0238	0.0281	0.0262	0.0023	25.183	0.01306	3612	4160	4233	3188	4121	4032	4181	4172	93.04	92.99	92.5	88.42	95.52
PGAL8A_00052900	816	573	70.22	PF3D7_0807200	conserved Plasmodium membrane protein, unknown function		0.0611	0.3929	0.5188	0.0154	0.3822	0.1058	0.3886	0.3426	0.2779	0.2824	0.3708	0.3629	0.3535	0.3819	0.3178	0.3083	0.5048	0.3466	0.3417	0.5003	0.5058	0.3523	0.3475	0.4044	0.4111	0.4538	0.4658	0.0228	15.463	0.07044	1606	247	394	572	691	626	257	765	65.35	75.44	61.09	59.15	86.84
PGAL8A_00053000	279	267	95.7	PF3D7_1214600	adrenodoxin-type ferredoxin, putative		0.0559	0.1091	0.0917	0.0087	0.091	0.0149	0.099	0.104	0.1041	0.0918	0.0875	0.0782	0.0567	0.043	0.0656	0.0558	0.0942	0.0933	0.0931	0.0836	0.0811	0.083	0.083	0.0697	0.0647	0.0593	0.055	0.0191	26.842	0.03438	1831	2843	3592	1461	3505	3785	3042	3320	78.41	73.08	77.83	65.52	91.14
PGAL8A_00053600	1710	1167	68.25	PF3D7_0403100	regulator of chromosome condensation, putative		0.0614	0.1718	0.2104	0.014	0.1722	0.0398	0.1666	0.1657	0.1509	0.1502	0.1562	0.1506	0.1541	0.1578	0.1641	0.1646	0.2163	0.2109	0.2053	0.2051	0.204	0.2	0.1959	0.1884	0.1932	0.1951	0.2004	0.021	48.183	0.07268	1589	1821	2246	700	2500	2616	1897	2501	52.14	29.17	37.71	33.2	27.42
PGAL8A_00053700	1185	132	11.14	PF3D7_0403200	pre-mRNA splicing factor, putative		0.0378	0.1067	0.1266	0.0087	0.1656	0.0091	0.1066	0.1481	0.0978	0.0995	0.0994	0.0997	0.1363	0.1531	0.1268	0.1268	0.113	0.1193	0.1193	0.1018	0.1142	0.1162	0.1162	0.1711	0.1711	0.1796	0.1796	0	52.934	0.09012	2647	2882	3163	1461	2578	3993	2892	2712	86.48	85.37	61.51	55.93	59.01
PGAL8A_00053800	438	192	43.84	PF3D7_0403300	conserved Plasmodium protein, unknown function		0.1409	0.3446	0.5972	0	0.5446	0.0687	0.3426	0.4756	0.4069	0.3994	0.3077	0.3056	0.5541	0.9121	0.4107	0.3829	0.5244	0.5582	0.4823	0.5217	0.5946	0.555	0.4811	0.3893	0.3846	0.3885	0.3801	0.0163	7.417	0.15816	173	382	259	3943	252	1455	386	302	52.86	34.98	25.05	26.44	78.75
PGAL8A_00053900	10041	4113	40.96	PF3D7_0403400	conserved Plasmodium protein, unknown function		0.0711	0.2942	0.3889	0.0198	0.288	0.0697	0.2859	0.2927	0.3091	0.2982	0.2942	0.2918	0.2904	0.2871	0.3098	0.3004	0.381	0.4096	0.4016	0.3805	0.39	0.4085	0.4002	0.3692	0.3649	0.3814	0.3696	0.0278	19.005	0.1117	1220	597	864	307	1261	1422	648	1084	54.96	54.53	39.76	45.92	35.38
PGAL8A_00054000	1146	834	72.77	PF3D7_0403500	ubiquitin specific protease, putative		0.0388	0.105	0.1694	0.0042	0.1673	0.0282	0.1088	0.1498	0.1537	0.1506	0.0981	0.1014	0.1383	0.1538	0.1507	0.1467	0.1692	0.1647	0.1589	0.1676	0.1705	0.1637	0.1585	0.1807	0.183	0.1964	0.1938	0.0061	13.255	0.0303	2596	2915	2683	2591	2557	3200	2851	2692	52.93	58.68	52	68.44	38.24
PGAL8A_00054200	1719	603	35.08	PF3D7_0403600	conserved Plasmodium protein, unknown function		0.0324	0.1992	0.3138	0.0084	0.2751	0.0495	0.205	0.3101	0.2754	0.2897	0.2067	0.2123	0.3103	0.2784	0.2909	0.3098	0.3451	0.3112	0.3313	0.3454	0.3108	0.3084	0.3282	0.3769	0.3559	0.3214	0.3031	0.0247	72.436	0.07166	2932	1420	1322	1519	1377	2176	1342	980	29.77	39.9	85.53	94.81	23.64
PGAL8A_00054300	2076	1551	74.71	PF3D7_0403700	pre-mRNA-splicing factor CLF1, putative		0.0154	0.0764	0.1074	0.0132	0.0802	0.0182	0.0752	0.0719	0.0755	0.0699	0.0848	0.0827	0.0736	0.0817	0.0838	0.0781	0.0963	0.1184	0.1158	0.0941	0.1017	0.1169	0.1143	0.1055	0.0999	0.1147	0.1087	0.0101	147.557	0.02986	3727	3419	3407	772	3648	3634	3451	3725	83.54	86.43	77.17	74.1	57.8
PGAL8A_00054400	2724	900	33.04	PF3D7_0403800	alpha/beta hydrolase, putative		0.0452	0.1647	0.2054	0.0039	0.2427	0.0975	0.1643	0.2237	0.3272	0.3243	0.1636	0.1629	0.2458	0.2492	0.3125	0.3151	0.2012	0.2901	0.2867	0.2002	0.2046	0.2876	0.2845	0.3851	0.3882	0.4	0.3985	0.0149	87.215	0.04514	2314	1915	2303	2676	1704	744	1937	1773	66.17	51.17	72.01	77.12	40.56
PGAL8A_00054500	3495	1530	43.78	PF3D7_0403900	SET domain protein, putative	PfSET8	0.0485	0.2455	0.3137	0.0146	0.1974	0.0715	0.2412	0.1926	0.2074	0.2082	0.2471	0.2447	0.1899	0.1909	0.2199	0.2206	0.3085	0.3064	0.306	0.309	0.3136	0.3079	0.3078	0.2582	0.2576	0.2624	0.2672	0.022	27.023	0.07032	2158	934	1323	641	2192	1371	976	2141	15.67	6.13	43.74	62.89	32.51
PGAL8A_00054600	246	198	80.49	PF3D7_0404000	conserved Plasmodium protein, unknown function		0.0323	0.1436	0.2269	0	0.1707	0.0898	0.1436	0.1776	0.2834	0.2375	0.1366	0.1366	0.194	0.1781	0.3048	0.2663	0.3003	0.2523	0.238	0.3003	0.2269	0.2523	0.238	0.3023	0.2844	0.3248	0.2975	0.057	15.221	0.19744	2935	2277	2084	3943	2521	891	2282	2337	53.85	33.89	40.44	64.18	77.94
PGAL8A_00054700	11664	1713	14.69	PF3D7_0404100	AP2 domain transcription factor AP2-SP2, putative	ApiAP2	0.172	0.5772	0.9208	0.0461	0.8003	0.1836	0.5809	0.7395	0.645	0.6117	0.5671	0.5726	0.7365	0.8232	0.5941	0.5858	0.922	0.7043	0.6841	0.9481	0.9543	0.7079	0.6841	0.8095	0.7999	0.8745	0.8693	0.0358	14.231	0.23778	94	56	38	13	54	68	55	54	12.98	4.59	10.11	19.16	11.03
PGAL8A_00054800	483	342	70.81	PF3D7_0404200	conserved Plasmodium protein, unknown function		0.0606	0.1924	0.3555	0.0071	0.3676	0.1008	0.188	0.3276	0.2509	0.2354	0.1803	0.1757	0.2927	0.3382	0.2649	0.2375	0.3494	0.2966	0.2739	0.3605	0.3674	0.3106	0.2873	0.3153	0.3023	0.3377	0.3244	0.0304	8.078	0.14768	1626	1509	1050	1799	762	702	1571	856	4.85	13.31	14.16	25.44	77.6
PGAL8A_00054900	1776	429	24.16	PF3D7_0404300	conserved Plasmodium protein, unknown function		0.0858	0.1671	0.1467	0.0122	0.1656	0.0455	0.1719	0.1747	0.2356	0.2309	0.1411	0.1474	0.1704	0.1639	0.2277	0.2372	0.1637	0.2234	0.22	0.1645	0.1477	0.2194	0.2102	0.2446	0.251	0.2386	0.2424	0.0279	83.333	0.11114	814	1876	2943	875	2578	2355	1824	2383	90.67	92.68	90.06	86.24	81.51
PGAL8A_00055000	942	798	84.71	PF3D7_0404400	6-cysteine protein	PF36	0.1132	0.2414	0.3172	0.003	0.3211	0.0915	0.2437	0.3138	0.3687	0.3572	0.2497	0.2521	0.3152	0.3151	0.3891	0.3763	0.3194	0.372	0.3692	0.3218	0.3176	0.3716	0.3721	0.3948	0.4095	0.3918	0.4025	0.0627	1.311	0.07342	366	970	1288	2943	1034	851	950	953	68.65	40.64	32.11	47.78	62.68
PGAL8A_00055100	1488	666	44.76	PF3D7_0404500	6-cysteine protein	P36p	0.1196	0.2685	0.3844	0.0089	0.3284	0.108	0.2695	0.3904	0.3141	0.311	0.2835	0.2865	0.4005	0.3676	0.3148	0.308	0.3791	0.3571	0.3445	0.3789	0.3852	0.3603	0.3479	0.3528	0.3635	0.336	0.3278	0.0261	0.523	0.09758	310	758	883	1417	983	599	749	547	42.51	46.93	27.09	29.89	18.28
PGAL8A_00055300	10902	3687	33.82	PF3D7_0404600	conserved Plasmodium membrane protein, unknown function		0.0716	0.3422	0.4829	0.0318	0.3356	0.1225	0.3366	0.3358	0.3036	0.2969	0.3438	0.3359	0.344	0.3427	0.2979	0.2953	0.4774	0.4327	0.4195	0.4808	0.4944	0.4216	0.4117	0.4038	0.4037	0.4167	0.4111	0.0278	37.233	0.09442	1207	386	488	58	938	402	407	810	70.78	70	59.88	32.65	34.57
PGAL8A_00055400	2529	1062	41.99	PF3D7_0404700	dipeptidyl aminopeptidase 3	PfDPAP3	0.0759	0.2023	0.2613	0.0099	0.2225	0.0397	0.1983	0.212	0.1597	0.1692	0.167	0.1665	0.21	0.2189	0.1538	0.1618	0.2508	0.2001	0.2119	0.2457	0.2565	0.1946	0.211	0.1759	0.1765	0.197	0.1939	0.0249	57.74	0.0423	1085	1381	1763	1208	1914	2618	1431	1914	38.88	20.79	75.54	92.49	52.93
PGAL8A_00055500	1788	723	40.44	PF3D7_0404800	conserved Plasmodium protein, unknown function		0.2465	0.5445	0.4429	0.0252	0.591	0.1106	0.5526	0.5697	0.6179	0.6265	0.4756	0.4643	0.4986	0.5766	0.5103	0.51	0.406	0.5001	0.497	0.4017	0.4348	0.4959	0.4969	0.4732	0.4958	0.5211	0.5505	0.046	1.535	0.14754	32	69	612	136	189	560	68	162	62.87	33.43	53.82	86.98	36.92
PGAL8A_00055600	1077	684	63.51	PF3D7_0404900	6-cysteine protein	Pf41	0.2114	0.3891	0.357	0.026	0.308	0.0431	0.3806	0.3187	0.4682	0.4628	0.433	0.4154	0.3681	0.3407	0.425	0.4179	0.3609	0.4227	0.3986	0.3295	0.3264	0.4094	0.3856	0.4366	0.4128	0.4443	0.4164	0.0377	52.012	0.11056	55	257	1039	123	1125	2463	271	916	62.94	41.87	88.78	96.47	50.89
PGAL8A_00055700	1578	1137	72.05	PF3D7_0405000	ATP-dependent RNA helicase DDX51, putative		0.0549	0.1885	0.2501	0.0152	0.1843	0.0228	0.1949	0.1712	0.2026	0.205	0.2022	0.2051	0.1875	0.2027	0.2136	0.2163	0.245	0.2593	0.2548	0.2454	0.249	0.2643	0.2608	0.2275	0.2229	0.2429	0.2388	0.029	9.656	0.05334	1874	1561	1852	588	2349	3447	1470	2429	86.98	76.16	54.53	54.21	73.24
PGAL8A_00055800	5880	2286	38.88	PF3D7_0405100	protein transport protein Sec24B, putative		0.0438	0.122	0.164	0.0052	0.1396	0.0484	0.1239	0.1392	0.166	0.1628	0.1217	0.1234	0.1486	0.1514	0.1777	0.1742	0.1548	0.1788	0.1757	0.1546	0.1664	0.1798	0.1768	0.1781	0.1749	0.181	0.177	0.009	62.311	0.04636	2379	2638	2745	2292	2889	2234	2606	2841	74.14	66.12	81.56	83.24	62.45
PGAL8A_00055900	1365	972	71.21	PF3D7_0405200	ag-1 blood stage membrane protein homologue	PfMAg-1	0.0213	0.1269	0.115	0.0054	0.1123	0.0335	0.1271	0.1196	0.0993	0.0978	0.1234	0.1291	0.1069	0.1009	0.0961	0.0949	0.1241	0.1149	0.1129	0.131	0.1216	0.1203	0.1183	0.098	0.0963	0.0929	0.0902	0.0012	12.684	0.04144	3448	2545	3317	2202	3256	2936	2544	3133	49.2	42.6	85.01	92.85	57.14
PGAL8A_00056000	3414	1074	31.46	PF3D7_0405300	liver specific protein 2, putative // sequestrin // 6-cysteine protein		0.1896	0.6057	0.6051	0.0211	0.5649	0.1583	0.598	0.5912	0.5986	0.6145	0.6304	0.6231	0.5997	0.5594	0.6698	0.6806	0.6401	0.6357	0.6181	0.6098	0.5903	0.6269	0.6124	0.5986	0.5848	0.5632	0.5511	0.0603	214.696	0.13592	68	43	245	252	212	137	44	142	30.17	9.85	11.65	19.77	10.07
PGAL8A_00056100	9513	6753	70.99	PF3D7_0405400	pre-mRNA-processing-splicing factor 8, putative	PRP8	0.0069	0.0216	0.0336	0.0012	0.0307	0.0071	0.0219	0.029	0.0265	0.0263	0.0221	0.0225	0.0296	0.0312	0.0258	0.0258	0.0318	0.0309	0.0309	0.0316	0.0335	0.031	0.031	0.0356	0.036	0.0369	0.0376	0.0027	219.716	0.0085	4064	4140	4088	3456	4115	4058	4136	4128	88.75	90.74	89.68	82.95	58.32
PGAL8A_00056200	666	477	71.62	PF3D7_0405500	conserved Plasmodium protein, unknown function		0.068	0.2097	0.3459	0.0074	0.2714	0.0778	0.2149	0.2357	0.2668	0.2677	0.2215	0.2214	0.2624	0.2928	0.2766	0.2764	0.303	0.3242	0.3162	0.3114	0.3548	0.3327	0.3244	0.3198	0.335	0.3361	0.3525	0.0178	13.465	0.09258	1314	1300	1099	1732	1411	1180	1249	1643	57.16	57.71	34.17	26.8	80.73
PGAL8A_00056300	945	723	76.51	PF3D7_0405600	conserved Plasmodium membrane protein, unknown function		0.0583	0.1392	0.165	0	0.1735	0.0515	0.1391	0.1706	0.1932	0.1805	0.1566	0.1565	0.1511	0.1597	0.1946	0.1888	0.164	0.1875	0.1819	0.164	0.1649	0.1874	0.1818	0.1889	0.181	0.2082	0.1969	0.0216	34.404	0.05318	1713	2360	2738	3943	2484	2092	2358	2438	69.62	64.77	65.55	58.13	84.32
PGAL8A_00056400	5973	3198	53.54	PF3D7_0405700	lysine decarboxylase, putative		0.0346	0.1302	0.1787	0.0086	0.1392	0.0482	0.1339	0.1407	0.1218	0.1216	0.1329	0.1366	0.1392	0.139	0.1295	0.129	0.1678	0.1517	0.1529	0.1696	0.1808	0.1549	0.1562	0.154	0.1541	0.1566	0.1565	0.007	7.05	0.03684	2822	2482	2584	1492	2897	2243	2432	2826	35.54	56.05	34.65	26.12	28.22
PGAL8A_00056500	315	246	78.1	PF3D7_0405800	conserved Plasmodium protein, unknown function		0.0257	0.1143	0.1975	0.0107	0.1368	0.0108	0.1136	0.1472	0.1844	0.1737	0.121	0.1205	0.1194	0.1087	0.1699	0.1608	0.2106	0.2236	0.2276	0.1975	0.1896	0.2086	0.2128	0.1417	0.1339	0.1352	0.1274	0.0159	43.028	0.04172	3249	2764	2373	1086	2930	3933	2784	2723	41.67	19.93	49.26	32.03	87.38
PGAL8A_00056600	2028	852	42.01	PF3D7_0405900	apical sushi protein	RON1	0.1177	0.2669	0.3451	0.0097	0.3452	0.0926	0.2698	0.345	0.3566	0.3393	0.2794	0.2827	0.3491	0.361	0.3809	0.3756	0.3384	0.4449	0.4207	0.336	0.3433	0.4463	0.4221	0.4949	0.4675	0.5215	0.4809	0.0342	488.465	0.15256	325	767	1103	1251	879	828	748	757	42.5	19.77	81.29	94.73	53.16
PGAL8A_00056700	1503	876	58.28	PF3D7_0406000	conserved Plasmodium protein, unknown function		0.05	0.1569	0.2404	0.0107	0.2068	0.049	0.1552	0.2067	0.1725	0.172	0.155	0.1512	0.2125	0.2088	0.184	0.1802	0.2371	0.1919	0.1874	0.2387	0.237	0.1917	0.1871	0.222	0.2197	0.2286	0.2263	0.0087	63.68	0.0587	2099	2053	1954	1086	2090	2204	2086	1974	62.37	69.1	76.46	83.95	69.22
PGAL8A_00056800	1485	1434	96.57	PF3D7_0406100	V-type proton ATPase subunit B		0.0033	0.0115	0.0102	0.0002	0.0124	0.0075	0.0115	0.018	0.0174	0.0173	0.0133	0.0133	0.0161	0.0128	0.0175	0.0157	0.0136	0.009	0.009	0.0135	0.0093	0.009	0.009	0.0158	0.0139	0.0134	0.0135	0.0017	200.661	0.00332	4175	4225	4245	3573	4246	4044	4224	4211	94.91	94.51	95.59	91.38	87.43
PGAL8A_00057000	792	747	94.32	PF3D7_0406400	cytosolic glyoxalase II		0.0558	0.101	0.1184	0.0032	0.1548	0.0305	0.1032	0.1639	0.1645	0.1669	0.1132	0.1155	0.1647	0.1602	0.1674	0.17	0.1256	0.1249	0.1264	0.1277	0.1202	0.1236	0.1251	0.1105	0.1107	0.1137	0.1144	0.0065	92.123	0.03042	1839	2997	3267	2874	2718	3092	2949	2530	87.05	82.13	84.99	91.64	81.31
PGAL8A_00057100	8100	1206	14.89	PF3D7_0406500	NYN domain-containing protein, putative		0.0463	0.2258	0.3516	0.0206	0.2786	0.0263	0.2112	0.2833	0.2516	0.2444	0.2216	0.2104	0.2829	0.2767	0.2578	0.2463	0.3544	0.2935	0.2846	0.3493	0.3465	0.2967	0.2858	0.3001	0.2982	0.3066	0.3023	0.0197	6.91	0.05754	2263	1125	1071	271	1344	3291	1286	1166	85.65	63.48	36.78	67.21	80.13
PGAL8A_00057300	2523	1224	48.51	PF3D7_0406700	conserved Plasmodium protein, unknown function		0.0913	0.2759	0.465	0.0091	0.3698	0.0749	0.2765	0.3308	0.257	0.27	0.3059	0.3129	0.3184	0.3584	0.2734	0.2854	0.438	0.3971	0.3898	0.4361	0.455	0.3884	0.388	0.3692	0.3731	0.3999	0.411	0.0155	30.964	0.09656	681	711	532	1374	748	1259	707	843	23.42	12.95	48.43	54.41	43.34
PGAL8A_00057400	816	729	89.34	PF3D7_0406800	ribosomal protein L25, putative		0.0332	0.0858	0.1335	0.0035	0.1032	0.0382	0.086	0.0958	0.0895	0.0845	0.093	0.0931	0.0999	0.1093	0.0903	0.0871	0.135	0.1143	0.1079	0.1317	0.1304	0.1145	0.1081	0.1187	0.1198	0.1225	0.1182	0.0088	100.403	0.06108	2880	3274	3087	2791	3370	2694	3271	3431	62	31.47	73.69	63.29	88.13
PGAL8A_00057500	9906	1506	15.2	PF3D7_0406900	conserved Plasmodium protein, unknown function		0.2607	0.7932	1.0099	0.0191	1.3474	0.1772	0.8451	1.1164	0.903	0.899	0.7755	0.79	0.9693	1.0805	0.9157	0.8836	0.9571	1.0772	1.0152	0.9629	1.0173	1.0626	1.043	0.9952	1.0629	1.0107	1.0758	0.0631	1.457	0.29342	28	14	24	334	4	82	10	8	50.25	28.11	10.73	13.67	19.91
PGAL8A_00057600	1314	576	43.84	PF3D7_0407000	conserved Plasmodium protein, unknown function		0.1005	0.2908	0.5115	0.0113	0.4406	0.1416	0.2935	0.4539	0.3967	0.4096	0.295	0.3002	0.4595	0.4331	0.4538	0.4397	0.4971	0.5115	0.5187	0.5032	0.5131	0.5152	0.5225	0.5303	0.5162	0.5585	0.5637	0.0321	14.799	0.2601	516	612	421	995	472	219	596	360	63.32	47.07	18.92	20.05	18.4
PGAL8A_00057700	933	684	73.31	PF3D7_0407100	methyltransferase, putative		0.0735	0.1674	0.2415	0.0053	0.1823	0.0492	0.1636	0.1767	0.1653	0.1779	0.1757	0.1721	0.1839	0.1921	0.1549	0.1632	0.2293	0.2255	0.2268	0.2238	0.2356	0.2214	0.2186	0.2215	0.2331	0.2329	0.2397	0.0212	28.658	0.07954	1151	1869	1945	2261	2370	2196	1947	2348	52.09	37.6	30.83	35.47	19.42
PGAL8A_00057800	555	381	68.65	PF3D7_0407200	peptidyl-tRNA hydrolase 2, putative		0.0323	0.1094	0.119	0.0069	0.1244	0.0272	0.1097	0.1361	0.1374	0.1275	0.1214	0.1129	0.1374	0.1285	0.1544	0.1524	0.0975	0.133	0.1292	0.0887	0.11	0.1247	0.1294	0.1313	0.1312	0.1363	0.1322	0.0169	35.463	0.13384	2935	2837	3258	1843	3100	3246	2841	2887	88.66	90.95	76.86	66.54	86.45
PGAL8A_00057900	723	426	58.92	PF3D7_0407300	transcription factor, putative		0.0643	0.1017	0.1949	0.0078	0.1294	0.0458	0.1117	0.1389	0.1576	0.1679	0.1189	0.1294	0.1425	0.154	0.1684	0.1814	0.1783	0.1885	0.2003	0.1901	0.2073	0.195	0.2074	0.1563	0.1568	0.1773	0.1817	0.0189	4.319	0.04928	1485	2984	2396	1638	3041	2345	2811	2847	68.06	80.04	31.28	31.57	57.54
PGAL8A_00058100	1143	756	66.14	PF3D7_0407500	mitochondrial carrier protein, putative		0.0083	0.0292	0.098	0.0032	0.0783	0.0188	0.0291	0.0707	0.0801	0.0839	0.0329	0.0327	0.0671	0.0766	0.0799	0.0838	0.0809	0.0864	0.0899	0.0804	0.0972	0.0864	0.0899	0.1113	0.1065	0.1191	0.1144	0.0067	35.582	0.02774	4012	4070	3520	2874	3671	3611	4072	3742	48.28	68.11	33.69	20.58	40.57
PGAL8A_00058200	3240	867	26.76	PF3D7_0407600	conserved Plasmodium protein, unknown function		0.1389	0.488	0.9885	0.034	0.9918	0.2563	0.5002	0.7379	0.5716	0.5785	0.5154	0.5288	0.701	0.9386	0.6427	0.6314	0.8743	0.6184	0.6059	0.8799	1.0168	0.6351	0.6147	0.9142	0.8903	1.0256	0.998	0.0635	1.042	0.1574	181	104	32	48	18	13	96	56	24.13	13.17	7.27	12.95	10.54
PGAL8A_00058300	5073	1923	37.91	PF3D7_0407700	conserved Plasmodium protein, unknown function		0.0667	0.1925	0.3356	0.0082	0.3157	0.1227	0.1917	0.2988	0.222	0.2137	0.1939	0.1912	0.3122	0.3027	0.2339	0.2242	0.2942	0.2287	0.2237	0.2941	0.3296	0.2258	0.2205	0.3074	0.3113	0.3193	0.3219	0.0089	77.739	0.07354	1374	1508	1163	1567	1066	399	1525	1052	28.47	10.8	56.85	77.38	47.29
PGAL8A_00058400	4068	1824	44.84	PF3D7_0407800	conserved Plasmodium protein, unknown function		0.0946	0.2705	0.5342	0.0118	0.5216	0.1367	0.2674	0.5089	0.4037	0.3972	0.2998	0.2956	0.4907	0.543	0.4122	0.4042	0.5037	0.4322	0.425	0.4987	0.5344	0.4382	0.4288	0.5913	0.5802	0.5814	0.5606	0.0152	104.886	0.0815	616	742	367	926	294	266	770	238	20.5	15.72	78.07	86.71	48.8
PGAL8A_00058500	1803	1173	65.06	PF3D7_0407900	AAA family ATPase, putative		0.0379	0.0683	0.107	0.0039	0.1109	0.0299	0.0707	0.1202	0.0841	0.0863	0.0643	0.0665	0.1229	0.1263	0.0918	0.0939	0.1141	0.0967	0.0994	0.1144	0.1073	0.0966	0.0998	0.1183	0.1238	0.1151	0.1209	0.008	14.324	0.01814	2642	3570	3411	2676	3276	3115	3529	3122	52.22	50.8	53.85	54.8	23.85
PGAL8A_00058600	513	402	78.36	PF3D7_0408000	conserved Plasmodium protein, unknown function		0.1014	0.4734	0.4729	0.0057	0.5865	0.0781	0.4818	0.6327	0.6125	0.5943	0.5326	0.5801	0.8775	0.8021	0.6587	0.6753	0.415	0.5218	0.4836	0.3989	0.4562	0.5262	0.4872	0.6214	0.5727	0.6488	0.6006	0.0342	5.122	0.12336	502	123	510	2121	193	1173	113	105	41.6	19.85	46.7	53.9	68.86
PGAL8A_00058700	3783	573	15.15	PF3D7_0408100	conserved Plasmodium protein, unknown function		0.1564	0.5213	0.8948	0.0061	0.7492	0.1543	0.5484	0.7453	0.6551	0.6262	0.5373	0.5607	0.666	0.6798	0.6354	0.5785	0.7525	1.0385	0.6943	0.7552	0.903	1.0175	0.6749	0.7654	0.7291	0.7762	0.7596	0.0506	50.206	0.13156	116	84	45	2025	71	160	70	51	59.08	36.39	27.9	46.31	20.6
PGAL8A_00058800	1416	327	23.09	PF3D7_0408200	conserved Plasmodium protein, unknown function		0.0774	0.3257	0.5989	0.0036	0.4492	0.0827	0.3381	0.4403	0.3255	0.3011	0.3635	0.3747	0.5461	0.3981	0.424	0.3775	0.5609	0.4007	0.4031	0.5793	0.6149	0.4034	0.4106	0.3957	0.3401	0.499	0.4194	0.0185	20.577	0.08016	1038	440	255	2762	443	1046	403	391	53.92	26.26	18.02	34.5	18.71
PGAL8A_00058900	801	333	41.57	PF3D7_0408300	zinc finger Ran-binding domain-containing protein 2, putative		0.0073	0.0683	0.1599	0	0.213	0.0455	0.0686	0.167	0.1278	0.1271	0.0662	0.0666	0.1632	0.2091	0.125	0.1244	0.1212	0.1305	0.1294	0.1215	0.1603	0.1309	0.1298	0.1832	0.1838	0.2335	0.2361	0.0036	61.792	0.0317	4051	3570	2800	3943	2019	2355	3567	2482	76.86	84.96	70.11	66.96	66.09
PGAL8A_00059000	1389	708	50.97	PF3D7_0408400	conserved Plasmodium protein, unknown function		0.0718	0.1666	0.2437	0.0119	0.2216	0.0694	0.1617	0.2017	0.1418	0.1386	0.1485	0.1489	0.2107	0.2235	0.1288	0.126	0.2183	0.1572	0.1536	0.2211	0.2475	0.1554	0.1519	0.2039	0.2043	0.2252	0.2266	0.0073	61.946	0.08718	1199	1882	1913	918	1921	1435	1980	2033	9.81	21.2	34.19	40.52	24.11
PGAL8A_00059100	1683	927	55.08	PF3D7_0408500	flap endonuclease 1	PfFEN1	0.0174	0.0486	0.0482	0.0013	0.0379	0.0103	0.047	0.0322	0.0815	0.0762	0.0427	0.0442	0.034	0.0363	0.078	0.0729	0.0512	0.0877	0.0842	0.0501	0.0467	0.0864	0.0827	0.0813	0.0745	0.0776	0.0708	0.0052	100.525	0.0117	3633	3854	3973	3426	4064	3948	3870	4101	41.44	31.87	84.2	88.52	68.62
PGAL8A_00059200	2952	2616	88.62	PF3D7_0408600	sporozoite invasion-associated protein 1	S5	0.0856	0.2392	0.3187	0.011	0.2766	0.0768	0.2334	0.2751	0.262	0.2708	0.2326	0.2311	0.2742	0.2726	0.2715	0.2772	0.3079	0.2886	0.2952	0.3099	0.3206	0.2866	0.2896	0.2645	0.2758	0.2616	0.2729	0.0387	0.402	0.08248	820	993	1275	1046	1368	1208	1044	1253	26.05	12.71	27.96	18.45	16.12
PGAL8A_00059300	2577	1638	63.56	PF3D7_0408700	perforin-like protein 1 // sporozoite micronemal protein essential for cell traversal	SPECT2	0.0478	0.1665	0.2158	0.0038	0.2141	0.0479	0.1685	0.2247	0.198	0.2033	0.1664	0.1685	0.224	0.2037	0.1948	0.1968	0.2295	0.1948	0.2005	0.2318	0.2178	0.1946	0.2003	0.1801	0.1811	0.1726	0.1771	0.0177	0.943	0.04554	2196	1884	2186	2709	2007	2259	1863	1755	35.23	6.27	18.37	21.16	45.28
PGAL8A_00059400	951	495	52.05	PF3D7_0408800	conserved Plasmodium protein, unknown function		0.1267	0.3208	0.3265	0	0.3395	0.0583	0.3217	0.3316	0.3409	0.3227	0.3404	0.3413	0.3518	0.3765	0.3352	0.3194	0.3309	0.3575	0.3494	0.3312	0.3267	0.359	0.3507	0.2898	0.2615	0.2897	0.259	0.0247	2.382	0.08288	247	463	1219	3943	916	1825	463	835	19.11	6.28	5.63	5.14	14.09
PGAL8A_00059600	5970	3072	51.46	PF3D7_0409000	conserved Plasmodium protein, unknown function		0.1219	0.402	0.7619	0.0174	0.6048	0.174	0.4021	0.5075	0.4378	0.4347	0.3796	0.3818	0.5227	0.6311	0.4528	0.4467	0.6513	0.5449	0.5451	0.6566	0.7717	0.5542	0.5541	0.6191	0.6133	0.7105	0.6957	0.0201	5.632	0.13528	288	229	93	421	172	92	232	242	37.55	13.33	18.82	41.99	14.22
PGAL8A_00059700	1512	945	62.5	PF3D7_0409100	U4/U6 small nuclear ribonucleoprotein PRP31, putative	PRP31	0.0118	0.0895	0.1243	0.0051	0.0769	0.0206	0.0864	0.0616	0.076	0.0776	0.0998	0.0967	0.0544	0.0724	0.0722	0.0739	0.1145	0.1185	0.1182	0.1145	0.1244	0.1166	0.1163	0.0712	0.07	0.0838	0.083	0.0051	190.871	0.0185	3884	3200	3191	2320	3685	3544	3263	3823	84.8	84.61	77.29	65.24	63.7
PGAL8A_00059800	1395	1305	93.55	PF3D7_0409200	protein SOF1, putative		0.0183	0.0702	0.1203	0.0027	0.0986	0.0292	0.0712	0.0934	0.0572	0.057	0.0722	0.0732	0.0931	0.0975	0.0586	0.0597	0.111	0.0877	0.0887	0.1121	0.1214	0.0888	0.0898	0.0933	0.0951	0.1054	0.1064	0.0047	61.296	0.0213	3594	3534	3242	3043	3421	3152	3524	3456	87.38	87.45	79.78	64.1	79.66
PGAL8A_00059900	2544	1740	68.4	PF3D7_0409300	conserved Plasmodium protein, unknown function		0.05	0.1635	0.2996	0.02	0.3014	0.0809	0.1642	0.2759	0.1784	0.175	0.1626	0.1639	0.261	0.2809	0.1711	0.1707	0.2976	0.2152	0.2101	0.3009	0.3052	0.2139	0.2089	0.2745	0.2813	0.3024	0.3088	0.0147	42.582	0.06474	2099	1940	1437	294	1167	1092	1938	1246	65.59	68.03	34.4	26.16	14.54
PGAL8A_00060000	1995	1134	56.84	PF3D7_0409400	chaperone protein DnaJ // heat shock protein 40	PfDnaJ	0.0115	0.0527	0.0801	0.001	0.0994	0.0261	0.0517	0.0841	0.0632	0.0627	0.0561	0.0548	0.0833	0.0964	0.0566	0.056	0.0667	0.0637	0.0659	0.0653	0.0788	0.0624	0.0649	0.0806	0.0824	0.0929	0.0963	0.0066	133.86	0.01418	3899	3796	3718	3496	3413	3299	3807	3570	74.47	81.88	61.76	40.21	24.18
PGAL8A_00060100	1209	624	51.61	PF3D7_0409500	conserved Plasmodium protein, unknown function		0.0565	0.1198	0.1979	0.0001	0.216	0.0676	0.1199	0.2209	0.1971	0.184	0.1214	0.1215	0.2187	0.221	0.2187	0.2047	0.1895	0.2031	0.1959	0.1892	0.1976	0.2026	0.1953	0.2188	0.2079	0.2221	0.2107	0.0132	11.36	0.04524	1805	2676	2370	3612	1978	1492	2665	1812	42.13	38.81	82.33	85.48	79.41
PGAL8A_00060200	2988	1815	60.74	PF3D7_0409600	replication protein A1, large subunit	RPA1L	0.0421	0.1522	0.213	0.008	0.1563	0.0907	0.151	0.1749	0.1538	0.1548	0.155	0.1569	0.1626	0.149	0.1517	0.152	0.2129	0.1988	0.1995	0.2113	0.2172	0.1989	0.1996	0.2167	0.2149	0.207	0.1999	0.0131	48.528	0.03682	2457	2138	2214	1601	2694	874	2145	2377	40.22	63.41	72.22	70.9	17.95
PGAL8A_00060300	591	315	53.3	PF3D7_0409700	peptide chain release factor 2	RF2Cyt	0.1019	0.23	0.3083	0.0128	0.3031	0.0656	0.2179	0.2863	0.3308	0.3245	0.206	0.1945	0.2622	0.2782	0.2596	0.2573	0.2847	0.3072	0.3024	0.2842	0.3055	0.3103	0.3057	0.3133	0.3094	0.2863	0.2844	0.0088	16.957	0.15714	496	1077	1358	811	1153	1554	1217	1142	28.61	58.66	57.45	70.43	87.35
PGAL8A_00060400	1626	927	57.01	PF3D7_0409800	zinc finger protein, putative		0.0311	0.1574	0.2004	0.0102	0.1534	0.0438	0.1558	0.1467	0.1365	0.1304	0.1576	0.1538	0.1364	0.1405	0.1472	0.141	0.1909	0.1582	0.1518	0.1876	0.1979	0.1604	0.1537	0.1532	0.1448	0.1699	0.1603	0.0138	88.834	0.04692	2992	2043	2353	1159	2729	2439	2077	2733	85.86	82.4	68.56	78.5	52.52
PGAL8A_00060500	1233	1056	85.64	PF3D7_0409900	actin-like protein, putative		0.0456	0.1672	0.2567	0.0057	0.2321	0.0757	0.1758	0.2309	0.1738	0.1747	0.167	0.1682	0.2107	0.2211	0.1668	0.1668	0.256	0.2013	0.2029	0.2528	0.2531	0.201	0.2027	0.2655	0.2705	0.2577	0.2582	0.0137	4.498	0.09202	2293	1874	1799	2121	1817	1239	1755	1689	54.44	35.83	48.35	88.13	50.22
PGAL8A_00060600	1983	801	40.39	PF3D7_0410000	erythrocyte vesicle protein 1		0.6985	1.0712	0.819	0.0186	1.2418	0.2328	1.1178	1.3537	1.0989	1.1273	1.0978	1.0541	1.2835	1.1478	1.1634	1.1832	0.7892	1.1322	1.0972	0.7972	0.8161	11.683	1.0588	0.8152	0.7525	0.7255	0.6714	0.0549	0.385	0.18462	2	4	67	358	5	19	3	3	73.64	86.62	76.41	78.36	37.23
PGAL8A_00060900	3240	1266	39.07	PF3D7_0410300	protein phosphatase PPM1, putative		0.0501	0.23	0.3157	0.0158	0.2612	0.0793	0.2255	0.2339	0.2198	0.213	0.2279	0.2253	0.2412	0.2612	0.2095	0.2083	0.3116	0.2612	0.2553	0.3116	0.3137	0.2537	0.2491	0.2568	0.2598	0.2487	0.2458	0.0141	56.177	0.04772	2090	1077	1307	537	1510	1141	1135	1661	63.94	64.1	55.69	58.63	46.08
PGAL8A_00061000	999	882	88.29	PF3D7_0410400	exosome complex component RRP4, putative		0.0149	0.0966	0.1312	0.0041	0.1057	0.022	0.0952	0.0846	0.0613	0.0572	0.099	0.0975	0.089	0.1019	0.0656	0.0619	0.1243	0.1125	0.1076	0.1249	0.1319	0.1108	0.106	0.0832	0.0789	0.1029	0.0984	0.003	102.154	0.01858	3756	3082	3112	2624	3339	3473	3100	3563	79.14	70.78	41.92	48.94	83.83
PGAL8A_00061100	684	315	46.05	PF3D7_0410500	conserved Plasmodium protein, unknown function		0.0876	0.1628	0.4718	0.0036	0.5259	0.1343	0.161	0.3942	0.218	0.2238	0.1274	0.1248	0.3618	0.449	0.1767	0.1841	0.4492	0.1774	0.1719	0.4385	0.4611	0.1733	0.1726	0.4015	0.4097	0.3949	0.3818	0.0088	31.857	0.10052	770	1954	516	2762	282	284	1988	531	18.55	19.39	13.45	27.51	44.5
PGAL8A_00061200	981	888	90.52	PF3D7_0410600	conserved Plasmodium protein, unknown function		0.0131	0.0434	0.0833	0	0.0738	0.0354	0.0435	0.0518	0.0863	0.0844	0.0402	0.0403	0.0484	0.0626	0.0822	0.0804	0.065	0.0819	0.0797	0.0651	0.0834	0.0822	0.0798	0.0964	0.0941	0.1197	0.117	0.0041	31.121	0.01234	3835	3916	3683	3943	3722	2843	3912	3931	73.24	83.5	72.04	62.06	72.49
PGAL8A_00061300	2286	1137	49.74	PF3D7_0410700	ribosome biogenesis GTPase A, putative	YlqF	0.035	0.095	0.1751	0.0101	0.1683	0.077	0.094	0.1334	0.1247	0.1251	0.1056	0.1033	0.1425	0.172	0.1267	0.1284	0.1476	0.13	0.1268	0.1444	0.176	0.1287	0.1256	0.1728	0.1713	0.201	0.1995	0.0099	29.085	0.03578	2803	3108	2627	1178	2550	1200	3129	2923	28.2	42.53	68.11	79.64	57.52
PGAL8A_00061400	3381	888	26.26	PF3D7_0410800	conserved Plasmodium protein, unknown function		0.0331	0.1812	0.3178	0.0151	0.291	0.0863	0.1737	0.2573	0.1911	0.1941	0.2009	0.1936	0.2707	0.3038	0.2122	0.2152	0.2982	0.2705	0.2584	0.2997	0.3299	0.2602	0.2523	0.2716	0.2856	0.3046	0.31	0.0179	94.388	0.04924	2885	1676	1282	596	1243	972	1797	1422	46.84	65.29	85.49	85.34	70.64
PGAL8A_00061500	2487	1134	45.6	PF3D7_0410900	conserved Plasmodium protein, unknown function		0.0231	0.1839	0.4428	0.0115	0.3637	0.1404	0.1829	0.2913	0.2225	0.2238	0.1797	0.1797	0.3035	0.3696	0.2206	0.2223	0.3501	0.2495	0.2431	0.3458	0.4328	0.2536	0.2471	0.3195	0.3144	0.3935	0.4093	0.0235	51.27	0.05238	3354	1631	613	970	778	233	1636	1099	61.47	62.84	41.35	35.94	46.01
PGAL8A_00061600	3477	669	19.24	PF3D7_0411000	conserved Plasmodium protein, unknown function		0.1291	0.4252	0.9076	0.0116	0.8892	0.202	0.4235	0.9237	0.4421	0.4376	0.4183	0.417	0.8999	0.8755	0.4743	0.4615	0.864	0.5251	0.5262	0.8664	0.9073	0.5225	0.5243	0.7925	0.7898	0.7957	0.7933	0.0228	23.484	0.1568	229	183	43	954	32	42	188	20	88.23	85.77	30.86	23.32	52.74
PGAL8A_00061700	597	438	73.37	PF3D7_0411100	conserved Plasmodium protein, unknown function		0.061	0.1882	0.3676	0.0051	0.2734	0.1102	0.1842	0.2549	0.1435	0.1406	0.2197	0.2154	0.2801	0.2908	0.1694	0.1725	0.3061	0.1979	0.1999	0.3145	0.3757	0.194	0.196	0.226	0.233	0.2917	0.3005	0.0055	42.679	0.07452	1612	1567	983	2320	1392	565	1617	1447	66.59	36.47	32.09	22.7	44
PGAL8A_00061800	2724	975	35.79	PF3D7_0411200	conserved Plasmodium protein, unknown function		0.1084	0.2873	0.4537	0.0084	0.4551	0.1511	0.2849	0.4005	0.2821	0.2877	0.2758	0.2731	0.4061	0.4539	0.286	0.2801	0.4438	0.3644	0.3447	0.4383	0.4578	0.3661	0.3432	0.463	0.4233	0.5814	0.5255	0.0709	8.181	0.11448	423	626	573	1519	422	170	650	511	37.16	57.05	29.31	12.86	32.96
PGAL8A_00061900	1971	660	33.49	PF3D7_0411300	conserved Plasmodium protein, unknown function		0.0901	0.2111	0.3443	0.0059	0.3862	0.0769	0.2213	0.3511	0.2531	0.2604	0.2365	0.2376	0.3751	0.3986	0.2639	0.2603	0.3424	0.3508	0.343	0.3422	0.3335	0.356	0.3479	0.3917	0.4087	0.363	0.3903	0.025	8.437	0.08222	715	1279	1107	2068	672	1203	1177	731	9.36	28.32	34.48	22.64	19.27
PGAL8A_00062000	3726	1551	41.63	PF3D7_0411400	DEAD box ATP-dependent RNA helicase, putative		0.0696	0.2347	0.3637	0.0269	0.2893	0.0815	0.2326	0.2734	0.1862	0.1846	0.2569	0.2486	0.2846	0.2877	0.2001	0.1959	0.3262	0.2522	0.2468	0.3412	0.3702	0.2452	0.2452	0.2761	0.2666	0.2978	0.2876	0.0371	24.385	0.09558	1267	1040	1002	109	1252	1079	1050	1268	56.59	57.76	29.38	21.29	39.31
PGAL8A_00062300	780	81	10.38	PF3D7_0411700	conserved Plasmodium protein, unknown function		0.0646	0.3553	0.4564	0	0.2815	0.1077	0.3615	0.2864	0.2475	0.2705	0.2902	0.256	0.3492	0.3262	0.2507	0.2779	0.5868	0.3108	0.275	0.5911	0.4543	0.3148	0.2795	0.4274	0.4518	0.4327	0.4648	0.0146	2.501	0.07182	1473	350	563	3943	1314	605	332	1140	13.88	10.54	1.45	19.85	85.84
PGAL8A_00062400	5232	882	16.86	PF3D7_0411800	conserved Plasmodium protein, unknown function		0.1368	0.4148	0.7837	0.0128	0.756	0.2038	0.4102	0.792	0.3798	0.4395	0.4455	0.4398	0.8211	0.7867	0.3839	0.437	0.6955	0.3593	0.3871	0.6941	0.7708	0.3688	0.3888	0.7088	0.6464	0.8358	0.736	0.087	54.61	0.12216	189	202	82	811	66	39	213	37	10.56	17.64	32.4	42.88	27.04
PGAL8A_00062600	4700	2826	60.13	PF3D7_0411900	DNA polymerase alpha catalytic subunit A		0.0363	0.0936	0.1988	0.0063	0.1642	0.0546	0.0935	0.1524	0.1388	0.137	0.0993	0.1001	0.155	0.1621	0.1406	0.1376	0.1801	0.159	0.1542	0.18	0.1988	0.1599	0.153	0.191	0.1929	0.2041	0.2044	0.0189	74.499	0.02668	2730	3138	2365	1967	2595	1969	3139	2665	28.24	47.12	83.75	83.38	59.7
PGAL8A_00062700	1530	837	54.71	PF3D7_0412000	LITAF-like zinc finger protein, putative		0.0604	0.1795	0.2481	0.0027	0.2566	0.0734	0.1792	0.2436	0.3745	0.3622	0.1893	0.1942	0.2627	0.272	0.3761	0.4071	0.2465	0.3666	0.3454	0.2523	0.2532	0.3685	0.3533	0.4148	0.4234	0.4523	0.4421	0.0709	61.965	0.02778	1640	1700	1874	3043	1547	1314	1701	1559	15.53	56.9	80.84	78.4	60.48
PGAL8A_00062800	936	648	69.23	PF3D7_0412100	30S ribosomal protein S12, mitochondrial, putative		0.0408	0.0721	0.151	0.0132	0.1694	0.0692	0.0721	0.1461	0.1084	0.1049	0.0808	0.0872	0.1566	0.163	0.11	0.1107	0.1341	0.1147	0.1155	0.1343	0.162	0.1124	0.1133	0.132	0.1378	0.1584	0.1645	0.0183	48.216	0.04912	2514	3499	2891	772	2541	1442	3503	2745	44.82	37.46	41.91	33.24	23.07
PGAL8A_00062900	975	675	69.23	PF3D7_0412200	conserved Plasmodium protein, unknown function		0.0381	0.2107	0.3819	0.007	0.3266	0.0947	0.2172	0.289	0.2047	0.1906	0.1937	0.2	0.2666	0.2962	0.2062	0.1918	0.3611	0.2735	0.2504	0.357	0.3855	0.2742	0.2513	0.2605	0.256	0.2986	0.2966	0.0266	8.657	0.0366	2634	1286	901	1818	992	793	1224	1117	31.49	39.74	18.24	22	51.24
PGAL8A_00063000	1485	561	37.78	PF3D7_1102400	phosphopantothenate--cysteine ligase, putative		0.1797	0.2004	0.314	0.0001	0.359	0.0813	0.2009	0.3025	0.2691	0.2875	0.2746	0.2749	0.3329	0.3593	0.3464	0.3435	0.2926	0.3373	0.3523	0.2957	0.3146	0.3388	0.3532	0.3183	0.3458	0.3132	0.3344	0.0257	17.147	0.06962	85	1404	1319	3612	806	1082	1405	1026	65.37	74.87	55.34	53.4	49.66
PGAL8A_00063100	3072	1005	32.71	PF3D7_0716000	RNA-binding protein, putative		0.0171	0.0972	0.1804	0.0024	0.1633	0.0688	0.0945	0.1477	0.1343	0.1308	0.0954	0.0954	0.1455	0.1618	0.1307	0.1294	0.1753	0.1469	0.1491	0.1757	0.1808	0.1476	0.1497	0.1619	0.159	0.1803	0.1754	0.0193	71.402	0.0132	3651	3069	2560	3128	2606	1453	3116	2718	89.27	89.49	79.25	61.19	79.02
PGAL8A_00063200	2838	1095	38.58	PF3D7_0716100	protein SDA1, putative		0.0359	0.1054	0.284	0.0053	0.3032	0.1264	0.1037	0.2482	0.1881	0.1891	0.1136	0.1119	0.2491	0.295	0.1902	0.1891	0.2522	0.1909	0.1898	0.2571	0.2838	0.1905	0.1894	0.2886	0.2918	0.3219	0.3204	0.0176	26.338	0.03426	2751	2905	1554	2261	1152	356	2942	1518	83.14	83.11	35.45	30.05	39.35
PGAL8A_00063300	1425	636	44.63	PF3D7_0716200	conserved Plasmodium protein, unknown function		0.0745	0.1488	0.2284	0.0019	0.2712	0.1096	0.1443	0.2589	0.2264	0.1905	0.1591	0.1551	0.2746	0.2715	0.2235	0.1945	0.2411	0.23	0.2094	0.2407	0.2286	0.2248	0.2053	0.3167	0.3042	0.3044	0.2941	0.0384	13.304	0.03878	1121	2194	2066	3277	1412	572	2268	1399	90.91	87.36	72.94	61.94	55.36
PGAL8A_00063400	1299	729	56.12	PF3D7_0716300	conserved Plasmodium protein, unknown function		0.0645	0.1824	0.2434	0.0165	0.1991	0.055	0.1774	0.1761	0.1816	0.1797	0.177	0.1694	0.1684	0.1862	0.1906	0.1853	0.2252	0.2252	0.2064	0.2184	0.2353	0.2252	0.2011	0.1983	0.194	0.2234	0.2128	0.0231	338.712	0.05072	1479	1658	1918	490	2168	1957	1725	2359	67.34	89.13	96.24	96.45	67.15
PGAL8A_00063500	486	273	56.17	PF3D7_0716400	transcription initiation factor IIA subunit 1, putative		0.0085	0.0817	0.1388	0.0001	0.0828	0.0047	0.081	0.0876	0.089	0.0949	0.0822	0.0815	0.0753	0.083	0.0784	0.0842	0.1458	0.1463	0.1542	0.1453	0.1386	0.1454	0.1533	0.0986	0.1055	0.1071	0.1146	0.0048	65.845	0.00824	4003	3350	3032	3612	3614	4136	3354	3524	68.22	44.14	84.97	83.5	92.85
PGAL8A_00063600	1356	669	49.34	PF3D7_0716500	conserved Plasmodium protein, unknown function		0.0909	0.2698	0.4872	0.0157	0.4639	0.0903	0.263	0.4071	0.3322	0.3252	0.3034	0.2903	0.4062	0.4466	0.3283	0.3255	0.4654	0.3943	0.3854	0.4673	0.4935	0.4067	0.4072	0.4852	0.4921	0.5133	0.5179	0.0266	17.97	0.16342	690	746	482	549	402	883	801	487	25.41	39.97	53.89	34.46	45.63
PGAL8A_00063700	1656	1095	66.12	PF3D7_0716600	cysteine desulfurase		0.0647	0.1954	0.3105	0.0086	0.2598	0.0624	0.1997	0.2232	0.1967	0.1985	0.2097	0.2133	0.2343	0.2754	0.2113	0.2058	0.2866	0.2727	0.2712	0.2937	0.3139	0.277	0.2746	0.3065	0.2932	0.3325	0.3194	0.03	17.899	0.06008	1468	1469	1344	1492	1521	1664	1418	1781	23.04	39.62	34.85	34.22	69.48
PGAL8A_00063800	2913	1212	41.61	PF3D7_0716700	conserved Plasmodium protein, unknown function		0.067	0.2352	0.6134	0.0074	0.6229	0.1885	0.2371	0.6069	0.2571	0.259	0.2463	0.2454	0.5949	0.6164	0.2505	0.2511	0.6186	0.3069	0.3107	0.6326	0.6292	0.3058	0.3097	0.6378	0.6368	0.6808	0.6753	0.0137	10.94	0.12328	1359	1033	234	1732	154	62	1012	128	19.49	36.06	27.99	32.47	18.68
PGAL8A_00063900	984	978	99.39	PF3D7_0716800	eukaryotic translation initiation factor 3 subunit I, putative		0.0059	0.0303	0.0659	0.0001	0.0575	0.0356	0.0302	0.0563	0.0492	0.0475	0.0314	0.0313	0.0635	0.0651	0.0502	0.0486	0.0711	0.0598	0.0581	0.071	0.0658	0.0597	0.0581	0.0732	0.0709	0.0619	0.0634	0.0038	99.01	0.00798	4101	4058	3819	3612	3871	2836	4059	3884	96.09	95.69	94.37	84.21	85.7
PGAL8A_00064000	969	609	62.85	PF3D7_0716900	drug/metabolite transporter, putative		0.0174	0.0393	0.0722	0.0001	0.062	0.0154	0.0393	0.0687	0.1724	0.1765	0.0367	0.0368	0.065	0.0631	0.1627	0.1712	0.0696	0.165	0.182	0.0705	0.0723	0.1655	0.1832	0.1867	0.2027	0.1985	0.2086	0.021	3.97	0.02176	3633	3960	3772	3612	3821	3763	3958	3759	72.96	76.82	69.95	51.04	56.12
PGAL8A_00064100	900	369	41	PF3D7_0717000	conserved Plasmodium membrane protein, unknown function		0.0597	0.1266	0.33	0.0032	0.3406	0.0658	0.1302	0.2847	0.3854	0.4066	0.1104	0.1142	0.2726	0.3131	0.3913	0.4061	0.2945	0.4146	0.434	0.2883	0.3235	0.419	0.4388	0.4567	0.422	0.5184	0.4713	0.0467	12.989	0.07876	1670	2549	1198	2874	903	1550	2491	1158	10.54	25.35	64.8	55.63	79.75
PGAL8A_00064200	2379	1191	50.06	PF3D7_0717100	conserved Plasmodium protein, unknown function		0.0344	0.1737	0.3353	0.0063	0.2866	0.1225	0.1735	0.2425	0.155	0.1516	0.1751	0.1746	0.2511	0.2883	0.1578	0.155	0.3192	0.2138	0.214	0.3155	0.3346	0.2188	0.2166	0.2706	0.2792	0.3097	0.3167	0.0176	41.713	0.05106	2835	1787	1167	1967	1272	402	1801	1572	40.38	73.03	74.05	80.08	32.06
PGAL8A_00064300	981	414	42.2	PF3D7_0717200	conserved Plasmodium protein, unknown function		0.0196	0.1217	0.2557	0.003	0.1585	0.0671	0.1219	0.1764	0.1167	0.1406	0.1314	0.1317	0.1898	0.1726	0.1292	0.1539	0.2714	0.1583	0.1665	0.2796	0.264	0.1539	0.1643	0.2792	0.3242	0.2484	0.2875	0.0303	186.365	0.03128	3538	2645	1805	2943	2665	1512	2636	2355	65.03	77.08	80.49	93.23	72.82
PGAL8A_00064400	1167	753	64.52	PF3D7_0717300	transcription initiation factor IIE subunit alpha, putative		0.0081	0.0707	0.1746	0.0033	0.1665	0.0505	0.0698	0.1528	0.0883	0.0827	0.0707	0.0698	0.1477	0.1607	0.0812	0.0755	0.1623	0.1053	0.0997	0.1608	0.173	0.1046	0.0992	0.1456	0.1341	0.1388	0.1363	0.0132	87.98	0.0338	4018	3527	2631	2843	2566	2136	3549	2655	67.8	82.24	79.87	82.41	78.22
PGAL8A_00064500	2148	1134	52.79	PF3D7_0717400	queuine tRNA-ribosyltransferase, putative		0.0414	0.1072	0.1893	0.0053	0.1424	0.0484	0.1061	0.135	0.0915	0.0872	0.1095	0.1081	0.138	0.1469	0.0925	0.0871	0.1887	0.1447	0.143	0.1849	0.1874	0.1417	0.14	0.1531	0.1531	0.1626	0.1626	0.0107	22.849	0.04018	2487	2875	2456	2261	2863	2234	2903	2901	86.24	86.72	63.46	61.42	25.39
PGAL8A_00064600	1587	1464	92.25	PF3D7_0717500	calcium-dependent protein kinase 4	PfCDPK4	0.0073	0.0208	0.0312	0.0008	0.0253	0.0063	0.0207	0.0218	0.0227	0.0228	0.0228	0.0236	0.027	0.0308	0.0247	0.0249	0.0315	0.0257	0.0258	0.0303	0.0299	0.0247	0.0247	0.0285	0.028	0.028	0.028	0.0002	233.223	0.00386	4051	4151	4115	3535	4152	4082	4150	4180	84.28	81.44	93.2	96.26	66.94
PGAL8A_00064700	2577	1338	51.92	PF3D7_0717600	conserved Plasmodium protein, unknown function		0.0574	0.1718	0.3686	0.015	0.3416	0.111	0.1777	0.2707	0.2428	0.2367	0.1936	0.1978	0.283	0.3469	0.2332	0.2297	0.3146	0.2951	0.2874	0.3056	0.3559	0.2881	0.2783	0.3366	0.3355	0.4022	0.4037	0.0268	65.938	0.07966	1755	1821	979	607	897	553	1718	1290	26	17.03	66.83	80.21	36.97
PGAL8A_00064800	1527	1305	85.46	PF3D7_0717700	serine--tRNA ligase, putative		0.0267	0.0851	0.1007	0.0017	0.0981	0.0315	0.0855	0.085	0.0979	0.0963	0.0825	0.0827	0.0784	0.0942	0.1014	0.0997	0.0809	0.103	0.1023	0.0801	0.1008	0.1036	0.1027	0.1198	0.1177	0.1332	0.1288	0.0105	58.96	0.01974	3198	3291	3486	3337	3429	3043	3281	3558	94.46	86.39	89.96	86.95	66.07
PGAL8A_00064900	3729	1320	35.4	PF3D7_0717800	conserved Plasmodium protein, unknown function		0.1114	0.4731	0.5439	0.0211	0.4095	0.0957	0.4861	0.3874	0.3963	0.3978	0.4613	0.468	0.388	0.4038	0.3754	0.3729	0.5261	0.4703	0.4728	0.5372	0.5626	0.477	0.4807	0.3672	0.3776	0.4024	0.4087	0.0213	7.504	0.13156	388	125	340	252	560	772	107	558	36.54	44.63	20.1	26.42	23.28
PGAL8A_00065000	1293	954	73.78	PF3D7_0717900	thioredoxin-like protein		0.0448	0.1549	0.1987	0.0038	0.156	0.0355	0.1583	0.1643	0.1934	0.1883	0.1633	0.1668	0.1671	0.168	0.2101	0.2048	0.2042	0.2103	0.2069	0.2076	0.1986	0.2143	0.2107	0.1854	0.1786	0.1949	0.188	0.0121	57.809	0.07336	2337	2084	2366	2709	2697	2837	2035	2523	55.04	77.1	55.17	37.55	47.6
PGAL8A_00065100	15357	9153	59.6	PF3D7_0718000	dynein heavy chain, putative		0.0254	0.0909	0.1459	0.0035	0.1284	0.0329	0.0904	0.1224	0.0901	0.0889	0.0908	0.0905	0.1203	0.1253	0.0878	0.0868	0.1392	0.1175	0.1159	0.1388	0.1463	0.1169	0.1156	0.1293	0.1285	0.1412	0.1412	0.0056	13.212	0.0259	3262	3180	2958	2791	3059	2971	3197	3080	11.7	14.94	10.85	13.47	18.33
PGAL8A_00065200	7182	3255	45.32	PF3D7_0718100	exported serine/threonine protein kinase	FEST	0.0508	0.2455	0.4546	0.0138	0.3275	0.1385	0.2428	0.3036	0.1894	0.1916	0.2513	0.2494	0.3028	0.3285	0.1913	0.1906	0.4213	0.307	0.3067	0.4163	0.4502	0.3078	0.3058	0.3118	0.3132	0.336	0.343	0.0168	45.815	0.15322	2060	934	570	718	986	245	962	1022	22.8	21.05	45.66	42.91	24.72
PGAL8A_00065700	708	132	18.64	PF3D7_1336200	conserved Plasmodium protein, unknown function		0.1692	0.4733	0.4245	0.0273	0.4074	0.043	0.4592	0.4403	0.4205	0.5143	0.4743	0.4523	0.3449	0.3247	0.3659	0.4002	0.4575	0.4004	0.3666	0.4657	0.4256	0.4463	0.4114	0.5328	0.6271	0.4906	0.5704	0.0994	72.488	0.11054	97	124	692	105	573	2470	141	391	13.36	57.07	58.51	32.75	30.62
PGAL8A_00066000	3108	1647	52.99	PF3D7_0518600	WD repeat-containing protein 26, putative		0.041	0.0999	0.1572	0.0029	0.1595	0.0394	0.0983	0.1552	0.1548	0.1662	0.0996	0.098	0.1386	0.1475	0.1543	0.1659	0.1549	0.1572	0.163	0.1555	0.1569	0.1581	0.1637	0.1721	0.1815	0.1821	0.1937	0.0302	81.183	0.03628	2507	3016	2832	2972	2655	2630	3055	2634	37.2	23.25	67.96	64.43	73.19
PGAL8A_00066200	606	339	55.94	PF3D7_0518800	secreted ookinete protein, putative		0.116	0.2992	0.3113	0.0077	0.2564	0.0605	0.2945	0.2659	0.295	0.2766	0.293	0.2837	0.3145	0.2905	0.3329	0.3154	0.3161	0.3451	0.3435	0.3059	0.301	0.3414	0.3323	0.4157	0.3482	0.3912	0.3347	0.0433	13.656	0.20176	345	562	1341	1669	1548	1737	590	1335	22.68	6.47	6.73	5.14	95.98
PGAL8A_00066300	642	384	59.81	PF3D7_0518900	conserved Plasmodium protein, unknown function		0.0675	0.1752	0.2754	0	0.252	0.0679	0.1752	0.2598	0.2972	0.3031	0.195	0.1952	0.26	0.2697	0.3123	0.3258	0.285	0.2962	0.3082	0.2851	0.2755	0.296	0.3078	0.2465	0.2766	0.2226	0.2297	0.034	3.627	0.07012	1335	1770	1626	3943	1594	1476	1768	1392	22.1	20.75	6.82	5.14	72.67
PGAL8A_00066500	375	366	97.6	PF3D7_0519100	50S ribosomal protein L14, mitochondrial, putative		0.0065	0.0361	0.0577	0.0034	0.0643	0.0005	0.0392	0.063	0.0482	0.0348	0.0296	0.0325	0.0558	0.0568	0.0519	0.0377	0.0564	0.0378	0.0314	0.0608	0.0621	0.0416	0.0347	0.0548	0.0626	0.0558	0.0638	0.0134	35.493	0.01748	4084	3996	3897	2816	3803	4230	3962	3807	65.73	53.52	68.32	70.52	85.25
PGAL8A_00066600	495	330	66.67	PF3D7_0519200	V-type proton ATPase 16 kDa proteolipid subunit		0.0113	0.0997	0.052	0.0037	0.1023	0.009	0.0944	0.1064	0.0944	0.101	0.085	0.0802	0.0908	0.0924	0.0785	0.0846	0.0428	0.0614	0.0572	0.0381	0.0472	0.0655	0.0613	0.0577	0.0533	0.0575	0.0628	0.0041	438.901	0.02372	3907	3021	3950	2737	3380	3998	3119	3290	96.07	98.06	98.81	98.81	98.74
PGAL8A_00066700	1467	804	54.81	PF3D7_0519300	protoheme IX farnesyltransferase, putative		0.0464	0.175	0.2639	0.0202	0.2529	0.0912	0.1707	0.2262	0.2096	0.1999	0.1982	0.2021	0.2157	0.2457	0.2031	0.1928	0.258	0.2583	0.2553	0.2493	0.2685	0.2623	0.2607	0.2683	0.2619	0.2796	0.2733	0.0205	61.055	0.12958	2258	1772	1736	287	1587	861	1839	1740	40.78	37.77	66.26	42.43	63.61
PGAL8A_00066800	402	399	99.25	PF3D7_0519400	40S ribosomal protein S24		0.0262	0.0608	0.0491	0.0001	0.0738	0.01	0.0603	0.0684	0.0788	0.0782	0.0503	0.0502	0.0629	0.0684	0.0669	0.0663	0.0522	0.0573	0.0562	0.0521	0.0491	0.0569	0.0559	0.0302	0.0309	0.0196	0.0202	0.0004	434.103	0.01598	3227	3683	3968	3612	3722	3961	3698	3762	99.07	98.11	96.75	94.34	97.18
PGAL8A_00066900	5775	1971	34.13	PF3D7_0519500	carbon catabolite repressor protein 4, putative		0.0274	0.0929	0.1372	0.0037	0.1259	0.0469	0.0941	0.1251	0.1868	0.1966	0.0949	0.095	0.1283	0.1301	0.1913	0.2029	0.1325	0.1882	0.2011	0.1319	0.1366	0.1878	0.2007	0.2164	0.2335	0.236	0.2515	0.027	49.058	0.02068	3159	3152	3050	2737	3084	2294	3124	3037	66.61	87.73	61.43	61.09	48.43
PGAL8A_00067000	1776	918	51.69	PF3D7_0519600	zinc finger protein, putative		0.0372	0.3053	0.4652	0.0151	0.3836	0.0937	0.3005	0.3901	0.3414	0.3432	0.3117	0.3084	0.4067	0.4044	0.3233	0.3259	0.4127	0.3796	0.373	0.4128	0.4618	0.3611	0.3548	0.492	0.4641	0.5199	0.4893	0.0359	9.727	0.07794	2680	539	531	596	684	812	551	549	66.94	70.86	59.6	53.07	21.87
PGAL8A_00067100	381	267	70.08	PF3D7_0519700	FoP domain-containing protein, putative		0.0132	0.1195	0.1879	0.0002	0.2018	0.0411	0.1188	0.2035	0.1834	0.1845	0.1256	0.1249	0.2032	0.2006	0.179	0.1808	0.1994	0.1674	0.1689	0.1993	0.1879	0.1667	0.1685	0.2273	0.2478	0.2136	0.2529	0.0359	137.426	0.01628	3828	2683	2474	3573	2141	2552	2690	2012	91.8	86.83	83.94	75.75	80.68
PGAL8A_00067200	3258	762	23.39	PF3D7_0519800	EELM2 domain-containing protein, putative		0.0434	0.1153	0.1808	0.0001	0.1574	0.051	0.1152	0.1798	0.1616	0.1544	0.109	0.1088	0.1617	0.1451	0.1512	0.1446	0.1797	0.1648	0.1557	0.1794	0.1807	0.1649	0.1558	0.1967	0.1864	0.1936	0.1832	0.0125	71.117	0.02588	2392	2744	2558	3612	2681	2110	2753	2308	92.56	94.81	84.51	82.26	80.41
PGAL8A_00067300	1293	582	45.01	PF3D7_0519900	conserved Plasmodium protein, unknown function		0.0654	0.2265	0.4476	0.0093	0.3375	0.0835	0.2274	0.3612	0.2737	0.2722	0.2428	0.2437	0.3462	0.3193	0.2602	0.2501	0.4568	0.3435	0.323	0.4496	0.4562	0.3364	0.3149	0.3802	0.3702	0.3549	0.3541	0.0322	86.452	0.08698	1430	1120	597	1338	926	1028	1113	674	31.92	49.73	34.55	40.85	28.37
PGAL8A_00067400	573	528	92.15	PF3D7_0520000	40S ribosomal protein S9, putative		0.0067	0.009	0.0074	0.0001	0.0129	0.005	0.009	0.0125	0.0139	0.0113	0.0068	0.0068	0.0103	0.0158	0.0162	0.0136	0.0024	0.014	0.0112	0.0024	0.0075	0.014	0.0112	0.0127	0.0099	0.0127	0.01	0.0023	878.792	0.00774	4073	4243	4261	3612	4244	4126	4244	4242	98.41	98.15	97.04	96.64	97.13
PGAL8A_00067500	1920	1164	60.63	PF3D7_0520100	protein phosphatase PPM9, putative		0.0371	0.1151	0.2118	0.0084	0.1922	0.0375	0.115	0.1897	0.1455	0.1535	0.1118	0.1118	0.1996	0.2045	0.1492	0.1585	0.2097	0.144	0.1467	0.2039	0.206	0.1423	0.1449	0.2055	0.2022	0.1987	0.2075	0.0301	83.95	0.05844	2687	2747	2230	1519	2251	2725	2757	2173	67.51	68.46	44.88	40.14	48.83
PGAL8A_00067600	2427	1221	50.31	PF3D7_0520200	conserved Plasmodium protein, unknown function		0.0501	0.1227	0.1803	0.0037	0.1761	0.0434	0.1233	0.1646	0.1537	0.1534	0.1128	0.1132	0.1723	0.1822	0.1557	0.1555	0.1696	0.1682	0.1665	0.1724	0.1828	0.1687	0.1662	0.2019	0.1919	0.2124	0.2023	0.0244	23.12	0.04186	2090	2623	2563	2737	2442	2456	2616	2519	44.66	66.21	54.67	42.63	22.68
PGAL8A_00067700	900	474	52.67	PF3D7_0520400	single-stranded DNA-binding protein, putative		0.0666	0.1812	0.2807	0.0001	0.3381	0.069	0.1802	0.3287	0.2632	0.2717	0.1539	0.1536	0.2847	0.2964	0.2238	0.2317	0.2872	0.2472	0.2644	0.2871	0.2809	0.2462	0.2643	0.3082	0.3258	0.2809	0.296	0.0159	79.294	0.06536	1380	1676	1579	3612	923	1449	1687	852	26.8	49.44	60.52	52.59	36.32
PGAL8A_00067900	447	393	87.92	PF3D7_0520600	bis(5'-nucleosyl)-tetraphosphatase [asymmetrical] // Ap4A hydrolase		0.1223	0.1827	0.1879	0.0097	0.2569	0.0536	0.1825	0.2355	0.2457	0.2478	0.2006	0.1956	0.2007	0.2385	0.1993	0.1937	0.1659	0.229	0.2181	0.1779	0.1885	0.2344	0.2238	0.1779	0.1745	0.2253	0.2325	0.0221	16.032	0.09218	284	1651	2474	1251	1543	2015	1652	1646	89.65	86.36	70.76	56.07	88.21
PGAL8A_00068000	2772	1305	47.08	PF3D7_0520700	CDC73 domain-containing protein, putative		0.0773	0.3261	0.4689	0.0071	0.3593	0.0701	0.3258	0.3563	0.29	0.3065	0.3175	0.316	0.3619	0.3597	0.2964	0.3093	0.4474	0.3413	0.363	0.4526	0.4691	0.3493	0.3722	0.3838	0.4379	0.397	0.4552	0.0688	28.727	0.0749	1045	438	520	1799	804	1410	444	698	55.22	63.3	29.25	26.8	24.58
PGAL8A_00068100	5553	3459	62.29	PF3D7_0520800	conserved Plasmodium protein, unknown function		0.0682	0.1767	0.2577	0.0034	0.2408	0.0487	0.1791	0.2254	0.2085	0.2189	0.1815	0.1832	0.2125	0.2265	0.2062	0.2156	0.2465	0.2355	0.2476	0.2455	0.2566	0.2361	0.2487	0.2424	0.2714	0.2648	0.2798	0.0504	23.223	0.04982	1307	1747	1790	2816	1727	2213	1703	1749	50.58	59.03	53.83	43.95	13.76
PGAL8A_00068200	1434	1395	97.28	PF3D7_0520900	S-adenosyl-L-homocysteine hydrolase // adenosylhomocysteinase		0.0137	0.051	0.0581	0.0017	0.0408	0.0213	0.051	0.0438	0.0723	0.0729	0.0501	0.05	0.0391	0.0422	0.0707	0.0712	0.0635	0.0862	0.0864	0.0633	0.0579	0.0861	0.0864	0.0685	0.0706	0.0716	0.0754	0.0083	171.537	0.0248	3805	3823	3892	3337	4034	3503	3817	4004	93.11	92.89	97.7	96.28	70.37
PGAL8A_00068400	4446	2382	53.58	PF3D7_0521100	conserved Plasmodium protein, unknown function		0.0779	0.2297	0.3578	0.0099	0.3266	0.0695	0.2335	0.3087	0.2598	0.2624	0.2402	0.2476	0.305	0.3162	0.2681	0.2715	0.346	0.292	0.2881	0.351	0.3651	0.2952	0.2914	0.3485	0.3581	0.3367	0.352	0.0308	6.959	0.1102	1020	1081	1029	1208	992	1431	1042	990	5.35	5.03	8.67	16.27	10.04
PGAL8A_00068500	978	495	50.61	PF3D7_0521200	conserved Plasmodium protein, unknown function		0.034	0.0961	0.1171	0.005	0.1228	0.0178	0.0964	0.0983	0.1397	0.135	0.0758	0.076	0.0958	0.1146	0.1396	0.135	0.0982	0.1395	0.1477	0.0985	0.1163	0.1332	0.1412	0.1666	0.164	0.1803	0.1776	0.0351	13.087	0.04688	2853	3092	3285	2341	3126	3645	3084	3398	24.82	19.09	24.55	5.14	40.83
PGAL8A_00068600	3693	1023	27.7	PF3D7_0521300	conserved Plasmodium protein, unknown function		0.0493	0.162	0.206	0.0143	0.1578	0.0509	0.1713	0.1645	0.1756	0.1761	0.1757	0.1855	0.1659	0.1677	0.1843	0.1875	0.2069	0.1993	0.2058	0.2137	0.209	0.2081	0.2132	0.2148	0.2172	0.2179	0.2199	0.0409	31.766	0.0907	2132	1961	2297	671	2675	2117	1834	2522	66.87	55.74	38.57	30.31	33.04
PGAL8A_00068700	1533	792	51.66	PF3D7_0521400	conserved Plasmodium protein, unknown function		0.037	0.1235	0.1587	0.0029	0.1269	0.023	0.1195	0.1202	0.1119	0.1049	0.1235	0.1195	0.121	0.1294	0.106	0.1002	0.1444	0.1562	0.1465	0.1392	0.1531	0.1533	0.1438	0.1298	0.1289	0.1349	0.1396	0.0195	19.566	0.02978	2695	2607	2808	2972	3075	3436	2672	3122	16.83	48.99	43.26	36.25	16.6
PGAL8A_00068800	1488	846	56.85	PF3D7_0521500	ribosomal large subunit pseudouridylate synthase, putative		0.0385	0.1541	0.2006	0.0029	0.1641	0.0443	0.1578	0.1577	0.1348	0.1376	0.1468	0.1506	0.1503	0.1577	0.1256	0.128	0.1739	0.1549	0.1545	0.1737	0.2016	0.1532	0.1528	0.1479	0.1451	0.1568	0.1601	0.0101	21.797	0.04852	2608	2096	2352	2972	2597	2404	2046	2604	48.31	59.13	49.16	45.44	13.59
PGAL8A_00068900	279	126	45.16	PF3D7_0521600	conserved Plasmodium protein, unknown function		0.1233	0.2993	0.4785	0	0.3529	0.1137	0.2993	0.2967	0.3625	0.362	0.2992	0.2992	0.2888	0.3878	0.4024	0.3982	0.3771	0.4813	0.4603	0.3771	0.4785	0.4813	0.4603	0.2848	0.2884	0.3377	0.3356	0.0217	3.919	0.3866	277	559	498	3943	829	517	561	1067	33.72	32.54	16.46	5.14	59.48
PGAL8A_00069000	2367	1815	76.68	PF3D7_0521700	ATP-dependent RNA helicase DDX1, putative		0.0314	0.1074	0.1414	0.004	0.1438	0.0214	0.1054	0.1303	0.1304	0.1376	0.1059	0.1047	0.1274	0.1387	0.1337	0.1394	0.1364	0.1495	0.1537	0.1363	0.1393	0.149	0.1541	0.152	0.1547	0.1639	0.1664	0.0286	10.572	0.0338	2971	2873	2999	2658	2833	3501	2914	2968	53.14	44.71	28.91	29.77	16.65
PGAL8A_00069100	1887	1296	68.68	PF3D7_0521800	AFG1-like ATPase, putative		0.0616	0.139	0.2105	0.0151	0.1621	0.0538	0.1377	0.1554	0.1772	0.1704	0.1503	0.1531	0.1522	0.1702	0.1767	0.17	0.1951	0.1766	0.1811	0.1969	0.2164	0.1764	0.1814	0.1934	0.1879	0.2053	0.2021	0.0212	11.643	0.11892	1581	2364	2244	596	2627	2001	2379	2632	41.18	18.73	26.95	39.45	51.17
PGAL8A_00069300	2139	918	42.92	PF3D7_0522100	conserved Plasmodium protein, unknown function		0.0777	0.2818	0.3509	0.0025	0.3373	0.0733	0.2818	0.3388	0.3306	0.3214	0.2789	0.2787	0.3205	0.3245	0.3198	0.3167	0.3416	0.3612	0.3414	0.34	0.3492	0.3642	0.3443	0.3167	0.302	0.3155	0.3063	0.0471	60.545	0.0599	1026	664	1072	3104	929	1320	668	790	16.64	16.95	41.65	61.61	37.22
PGAL8A_00069400	357	228	63.87	PF3D7_0522200	transcription initiation factor TFIID subunit 10, putative		0.0147	0.1183	0.2366	0.0001	0.1886	0.0369	0.1204	0.183	0.2034	0.206	0.0961	0.0975	0.1595	0.1673	0.1796	0.1994	0.2351	0.2409	0.2519	0.2362	0.2375	0.2429	0.2542	0.2695	0.2674	0.2955	0.2924	0.0269	69.564	0.05432	3766	2702	1989	3612	2295	2753	2657	2266	86.74	68.49	65.8	63.06	89.84
PGAL8A_00069500	822	636	77.37	PF3D7_0522300	18S rRNA (guanine-N(7))-methyltransferase, putative		0.0154	0.0502	0.0554	0.0001	0.0408	0.0128	0.0504	0.0544	0.0767	0.079	0.0496	0.0501	0.0498	0.0358	0.0734	0.0758	0.0616	0.0734	0.075	0.0618	0.056	0.0739	0.0757	0.092	0.0937	0.0867	0.0882	0.0039	135.548	0.02782	3727	3833	3919	3612	4034	3852	3824	3899	86.2	90.41	75.64	66.14	79.14
PGAL8A_00069600	24837	11076	44.59	PF3D7_0522400	conserved Plasmodium protein, unknown function		0.0929	0.2257	0.2965	0.008	0.2733	0.0735	0.2267	0.2705	0.282	0.2792	0.2288	0.2304	0.2642	0.2672	0.2818	0.2765	0.2904	0.2982	0.2849	0.2905	0.295	0.2997	0.2867	0.3205	0.3144	0.3262	0.3215	0.025	32.079	0.07754	645	1127	1467	1601	1394	1310	1121	1293	22.81	15.36	44.85	63.56	40
PGAL8A_00069700	501	432	86.23	PF3D7_0522500	50S ribosomal protein L17, apicoplast, putative		0.0618	0.144	0.1636	0.0028	0.1893	0.0191	0.1428	0.1938	0.1472	0.143	0.1507	0.149	0.1976	0.1917	0.1491	0.1538	0.1791	0.1726	0.1781	0.1771	0.1625	0.167	0.1725	0.189	0.1837	0.1924	0.1872	0.0029	26.347	0.07404	1571	2269	2750	3014	2290	3600	2290	2122	28.07	39.69	80.32	77.19	91.4
PGAL8A_00069800	1386	987	71.21	PF3D7_0522600	inner membrane complex protein		0.0202	0.0383	0.0584	0	0.0497	0.0159	0.0382	0.0547	0.0546	0.0588	0.04	0.04	0.0522	0.0521	0.0601	0.0626	0.0609	0.0587	0.06	0.0609	0.0584	0.0586	0.0599	0.0542	0.0556	0.054	0.0549	0.005	52.63	0.01718	3514	3973	3887	3943	3949	3738	3973	3898	35.61	54.96	71.59	89.67	46.1
PGAL8A_00069900	516	396	76.74	PF3D7_0522700	iron-sulfur assembly protein, putative		0.0568	0.1503	0.2187	0.0001	0.2297	0.0553	0.1507	0.2283	0.1486	0.1437	0.1631	0.1635	0.2349	0.2294	0.1605	0.1617	0.2166	0.1202	0.1321	0.2163	0.2183	0.1201	0.1319	0.1836	0.1978	0.1726	0.1925	0.0243	12.76	0.09236	1783	2169	2168	3612	1835	1944	2150	1720	33.41	31.65	39.78	47.1	28.44
PGAL8A_00070000	444	405	91.22	PF3D7_0522800	pre-mRNA-splicing factor BUD31, putative		0.0208	0.0295	0.0338	0.0001	0.0325	0.0002	0.0295	0.0316	0.047	0.0502	0.0264	0.0264	0.0346	0.0355	0.0425	0.0399	0.0331	0.0554	0.0516	0.033	0.0338	0.0555	0.0517	0.0648	0.0604	0.0657	0.0612	0.0031	47.27	0.01332	3479	4064	4084	3612	4098	4260	4064	4106	81.36	84.73	62.56	62.94	81.79
PGAL8A_00070100	4524	933	20.62	PF3D7_0522900	zinc finger protein, putative		0.0667	0.3573	0.5211	0.0089	0.3612	0.0837	0.3655	0.3327	0.3146	0.3119	0.3702	0.381	0.3386	0.3627	0.3441	0.3493	0.4733	0.4194	0.4122	0.471	0.5298	0.4198	0.4127	0.4654	0.4667	0.4789	0.48	0.015	62.266	0.11576	1374	340	386	1417	790	1021	321	821	39.07	28.23	20.27	18.95	28.15
PGAL8A_00070200	4131	2997	72.55	PF3D7_0523000	multidrug resistance protein 1 // ABC transporter B family member 1	Pgh1	0.067	0.1001	0.0823	0.0019	0.1003	0.0248	0.1004	0.1019	0.1262	0.1275	0.1086	0.1091	0.1189	0.1211	0.1348	0.141	0.0831	0.1202	0.1203	0.0833	0.0815	0.1194	0.1195	0.1232	0.1259	0.1298	0.1312	0.0219	107.346	0.03086	1359	3012	3694	3277	3403	3355	3012	3341	94.81	94.1	87.31	73.78	56.64
PGAL8A_00070300	1602	1404	87.64	PF3D7_0523100	mitochondrial-processing peptidase subunit alpha, putative		0.0136	0.0548	0.0775	0.0025	0.065	0.017	0.0557	0.0638	0.0617	0.061	0.0543	0.055	0.0648	0.0681	0.0608	0.0622	0.0725	0.0772	0.0757	0.0722	0.0772	0.0779	0.0765	0.0752	0.0702	0.0777	0.0725	0.0035	127.076	0.01496	3809	3774	3734	3104	3796	3675	3768	3802	75	83.12	83.59	80.49	58.09
PGAL8A_00070400	2850	1416	49.68	PF3D7_0523200	conserved Plasmodium protein, unknown function		0.1088	0.4138	0.6021	0.0202	0.5317	0.1099	0.4246	0.4722	0.4112	0.3853	0.4142	0.4233	0.4774	0.5251	0.3969	0.373	0.5563	0.533	0.4964	0.5831	0.6323	0.5524	0.5141	0.5644	0.546	0.5878	0.5764	0.032	5.341	0.22124	418	205	252	287	275	569	187	311	42.63	59.6	33.15	49.43	32.79
PGAL8A_00070500	393	357	90.84	PF3D7_0523300	conserved Plasmodium protein, unknown function		0.0275	0.0692	0.0918	0.0102	0.0885	0.0073	0.0802	0.0768	0.0768	0.08	0.0823	0.0892	0.0808	0.0925	0.077	0.0805	0.0795	0.0942	0.1074	0.0842	0.0969	0.1019	0.1154	0.0558	0.059	0.066	0.0698	0.0154	144.238	0.03724	3151	3559	3591	1159	3540	4052	3368	3668	68.67	81.22	90.22	89.89	98.1
PGAL8A_00070600	1593	1269	79.66	PF3D7_0523400	DnaJ protein, putative		0.0189	0.0426	0.0455	0.0019	0.0514	0.0083	0.0406	0.046	0.0597	0.0567	0.0455	0.0435	0.0443	0.0487	0.0596	0.0573	0.042	0.0556	0.0562	0.0418	0.0453	0.0578	0.0584	0.0546	0.0572	0.0584	0.0584	0.0077	138.88	0.0165	3562	3922	3998	3277	3930	4022	3944	3984	57.47	76.15	79.68	73.6	45.32
PGAL8A_00070700	345	333	96.52	PF3D7_0523500	dynein light chain Tctex-type, putative		0.0898	0.2144	0.2815	0.0071	0.2683	0.0261	0.205	0.2694	0.2952	0.2936	0.1929	0.1833	0.2022	0.1939	0.2679	0.2725	0.2832	0.3102	0.3037	0.2719	0.272	0.297	0.2914	0.2963	0.3065	0.3116	0.3222	0.016	16.987	0.11048	719	1240	1575	1799	1435	3299	1342	1304	24.68	37.18	39.1	5.14	91.74
PGAL8A_00070800	624	618	99.04	PF3D7_0523600	conserved Plasmodium protein, unknown function		0.0137	0.0316	0.0634	0.002	0.075	0.0081	0.0295	0.0787	0.0679	0.0601	0.0377	0.0358	0.0797	0.076	0.071	0.0636	0.067	0.0642	0.0613	0.0647	0.0611	0.066	0.0629	0.0739	0.0643	0.0768	0.067	0.007	39.131	0.02562	3805	4049	3844	3240	3707	4030	4064	3647	34.26	52.92	82	88.92	90.86
PGAL8A_00070900	3843	1605	41.76	PF3D7_0523700	conserved Plasmodium membrane protein, unknown function		0.1003	0.2184	0.4233	0.012	0.3921	0.0893	0.2256	0.3433	0.2529	0.2399	0.2551	0.2598	0.3435	0.3851	0.2661	0.2501	0.3824	0.2716	0.2592	0.394	0.4282	0.2851	0.2693	0.3309	0.3232	0.3932	0.3741	0.0316	13.874	0.16864	519	1209	700	905	642	905	1132	763	22.28	34.05	15.46	21.86	17.6
PGAL8A_00071000	1935	1293	66.82	PF3D7_0523800	transporter, putative		0.067	0.1567	0.188	0.0124	0.1646	0.0563	0.16	0.1848	0.2559	0.2587	0.163	0.1618	0.2057	0.1933	0.2628	0.2635	0.1946	0.274	0.2728	0.1961	0.1917	0.2838	0.2781	0.2475	0.25	0.2374	0.2365	0.0217	31.885	0.05712	1359	2058	2472	858	2588	1901	2002	2243	70.12	38.74	49.28	48.17	47.17
PGAL8A_00071100	597	294	49.25	PF3D7_0523900	conserved Plasmodium membrane protein, unknown function		0.0742	0.2304	0.5401	0.0044	0.58	0.1591	0.2237	0.5444	0.5204	0.4929	0.2506	0.251	0.5045	0.5446	0.534	0.4909	0.6163	0.5324	0.5298	0.6112	0.5344	0.5264	0.5256	0.4586	0.4298	0.3992	0.387	0.0195	16.45	0.14952	1130	1073	348	2528	199	134	1156	194	78.09	65.09	63.34	77.69	87.62
PGAL8A_00071200	3372	3030	89.86	PF3D7_0524000	karyopherin beta		0.0053	0.0355	0.0526	0.0008	0.0494	0.0036	0.0349	0.0482	0.0744	0.0722	0.0374	0.0368	0.048	0.0507	0.0715	0.0695	0.0518	0.0769	0.0747	0.0517	0.0526	0.078	0.0756	0.0707	0.0705	0.0742	0.0742	0.0051	487.748	0.00514	4118	4005	3945	3535	3950	4161	4010	3967	96.26	93.2	93.42	87.4	32.73
PGAL8A_00071300	2814	1281	45.52	PF3D7_0524100	conserved Plasmodium protein, unknown function		0.1024	0.2799	0.4646	0.0102	0.4438	0.1023	0.2726	0.3809	0.386	0.3948	0.2965	0.2829	0.3759	0.4306	0.3912	0.3865	0.4425	0.445	0.4526	0.4456	0.4637	0.4333	0.4434	0.448	0.4567	0.4761	0.4844	0.0516	10.391	0.10564	488	680	536	1159	462	685	730	577	81.03	53.83	34.91	40.28	48.76
PGAL8A_00071400	462	333	72.08	PF3D7_0524200	conserved Plasmodium membrane protein, unknown function		0.3532	0.4393	0.5194	0.0076	0.7221	0.062	0.4291	0.685	0.6425	0.6213	0.5078	0.5124	0.6524	0.6569	0.8578	0.8446	0.5095	0.6206	0.6264	0.5007	0.5101	0.6204	0.6264	0.8073	0.8495	0.7471	0.7774	0.0311	16.635	0.19828	13	163	393	1690	82	1678	177	78	46.72	14.06	39.43	60.67	86.52
PGAL8A_00071500	1302	624	47.93	PF3D7_0524300	conserved Plasmodium protein, unknown function		0.084	0.1906	0.2995	0.0131	0.2577	0.0618	0.1903	0.2713	0.2837	0.2695	0.2129	0.213	0.3348	0.3295	0.265	0.2633	0.296	0.2882	0.3008	0.2896	0.2991	0.2757	0.294	0.3729	0.3372	0.3628	0.334	0.0691	65.24	0.0879	864	1531	1438	781	1539	1686	1541	1285	71.46	66.66	55.77	44.63	39.81
PGAL8A_00071600	1098	1011	92.08	PF3D7_0524400	ribosome-interacting GTPase 1, putative		0.0012	0.0085	0.0155	0.0001	0.0149	0.0014	0.0084	0.0136	0.0166	0.0154	0.0095	0.0096	0.0124	0.0137	0.0179	0.0166	0.0139	0.0214	0.0202	0.0139	0.0153	0.0214	0.0202	0.0236	0.0224	0.0228	0.0216	0.0012	111.162	0.0022	4237	4249	4219	3612	4231	4212	4250	4232	81.24	89.77	85.51	80.11	65.29
PGAL8A_00071700	369	195	52.85	PF3D7_0524500	conserved Plasmodium protein, unknown function		0.144	0.511	0.5724	0.0058	0.5415	0.0892	0.518	0.5637	0.4344	0.3985	0.4848	0.4899	0.4269	0.4877	0.5079	0.5236	0.4946	0.5229	0.4701	0.4993	0.579	0.5313	0.4766	0.4904	0.5592	0.6088	0.6601	0.0712	16.031	0.08476	162	88	293	2098	258	907	82	169	73.31	60.22	64.64	60.28	71.54
PGAL8A_00071800	726	342	47.11	PF3D7_0524600	50S ribosomal protein L12, apicoplast, putative		0.0688	0.1322	0.213	0.0215	0.2033	0.0496	0.1336	0.1633	0.1569	0.1753	0.1365	0.133	0.1766	0.2222	0.1559	0.172	0.2038	0.2035	0.2268	0.2112	0.2145	0.2122	0.2358	0.2468	0.2426	0.2512	0.2493	0.0265	75.056	0.11776	1285	2452	2214	231	2116	2173	2436	2538	55.86	43.2	76.72	76.23	82.57
PGAL8A_00071900	318	144	45.28	PF3D7_0524700	mitochondrial import receptor subunit TOM22, putative		0.0014	0.1142	0.2203	0.016	0.1627	0.035	0.1119	0.1446	0.1332	0.1471	0.1149	0.1132	0.1486	0.165	0.1358	0.1498	0.1924	0.1104	0.1208	0.1807	0.1945	0.1	0.122	0.1866	0.2161	0.1942	0.2205	0.0241	28.769	0.07108	4231	2765	2149	524	2617	2862	2806	2776	88.14	91.26	83.49	70.57	96.31
PGAL8A_00072000	1944	1191	61.27	PF3D7_0524800	ubiquitin fusion degradation protein 1, putative		0.0454	0.1705	0.2298	0.01	0.1842	0.0467	0.1747	0.1689	0.1511	0.1589	0.1879	0.1888	0.1688	0.1757	0.1523	0.16	0.2403	0.196	0.1996	0.2394	0.2284	0.1946	0.1984	0.2157	0.2151	0.2219	0.2297	0.0252	7.139	0.04616	2302	1834	2051	1192	2350	2305	1776	2460	46.63	50.08	30.73	48.8	52.97
PGAL8A_00072200	2592	1668	64.35	PF3D7_0524900	S-adenosyl-L-methionine-dependent tRNA 4-demethylwyosine synthase, putative		0.0588	0.185	0.225	0.0076	0.1797	0.041	0.1787	0.1751	0.1577	0.1548	0.1767	0.1729	0.172	0.1785	0.1515	0.1511	0.2084	0.1768	0.1684	0.2039	0.2233	0.1723	0.1642	0.1674	0.1738	0.1739	0.1801	0.0175	16.716	0.0402	1698	1612	2102	1690	2397	2562	1709	2375	87.76	85.86	62.4	38.62	62.3
PGAL8A_00072300	1500	732	48.8	PF3D7_0525000	zinc finger protein, putative		0.0265	0.1076	0.1735	0.0049	0.1225	0.0343	0.1059	0.1247	0.1233	0.1146	0.1066	0.1048	0.1204	0.1213	0.1242	0.1226	0.1735	0.1607	0.1604	0.1708	0.1709	0.1606	0.1603	0.1276	0.1272	0.1308	0.1262	0.0159	105.064	0.04164	3210	2869	2641	2382	3130	2891	2906	3045	70.92	94.76	77.06	49.32	61.19
PGAL8A_00072400	2022	1794	88.72	PF3D7_0525100	acyl-CoA synthetase	PfACS10	0.0851	0.1959	0.18	0.0193	0.1995	0.0416	0.1945	0.2222	0.2323	0.238	0.174	0.1704	0.1905	0.1836	0.2115	0.2216	0.1876	0.2137	0.2195	0.1936	0.186	0.2163	0.2224	0.1895	0.2	0.1806	0.1934	0.0339	307.123	0.07714	833	1460	2567	326	2162	2525	1475	1794	88.97	87.61	92.76	81.1	58.04
PGAL8A_00072500	4491	2220	49.43	PF3D7_0525200	structural maintenance of chromosomes protein 6, putative		0.0428	0.1791	0.2776	0.0091	0.2338	0.0569	0.1778	0.2187	0.2265	0.2319	0.1819	0.1784	0.2226	0.2311	0.2347	0.2359	0.2649	0.2616	0.2549	0.2644	0.2723	0.2565	0.2513	0.2743	0.2741	0.2931	0.2954	0.0347	85.259	0.04858	2428	1706	1608	1374	1800	1877	1717	1831	61.57	53.64	63.94	75.07	41.94
PGAL8A_00072600	1182	534	45.18	PF3D7_0525300	conserved Plasmodium protein, unknown function		0.0785	0.2354	0.3325	0.0088	0.2376	0.0392	0.227	0.223	0.2206	0.215	0.2512	0.2493	0.2802	0.301	0.2704	0.265	0.2968	0.2452	0.2447	0.2891	0.3178	0.2365	0.2353	0.2808	0.2797	0.2804	0.2791	0.0068	76.801	0.0999	994	1030	1182	1438	1764	2640	1118	1783	24.47	8.69	28.06	44.69	60.22
PGAL8A_00072700	1353	963	71.18	PF3D7_0525400	G-protein coupled receptor, putative		0.0409	0.2024	0.3596	0.0134	0.2543	0.0509	0.2042	0.2582	0.2401	0.2341	0.2033	0.208	0.2738	0.278	0.247	0.2427	0.3453	0.2916	0.2841	0.352	0.3643	0.2972	0.29	0.2779	0.2791	0.2812	0.2889	0.0385	24.413	0.05798	2510	1377	1024	757	1575	2117	1354	1409	40.61	20.27	56.6	65.86	74.23
PGAL8A_00072800	4731	2349	49.65	PF3D7_0525500	WD repeat-containing protein, putative		0.0581	0.2249	0.3045	0.0187	0.2668	0.0718	0.2211	0.253	0.2537	0.2541	0.2245	0.2209	0.2463	0.2676	0.2515	0.2559	0.3037	0.2957	0.3001	0.3055	0.3041	0.2953	0.2977	0.3306	0.3303	0.3426	0.3451	0.0435	23.571	0.076	1722	1136	1391	351	1446	1363	1180	1465	65.66	61.26	18.63	15.92	12.5
PGAL8A_00072900	1053	729	69.23	PF3D7_0525600	RNA methyltransferase, putative		0.0464	0.1992	0.3165	0.0166	0.2624	0.075	0.1929	0.2504	0.205	0.2032	0.2057	0.1995	0.2341	0.2411	0.1992	0.1901	0.3142	0.2583	0.2528	0.3009	0.3091	0.2495	0.2419	0.2622	0.2624	0.2627	0.2617	0.0256	12.14	0.12404	2258	1420	1297	479	1489	1256	1507	1492	35.43	63.77	74.9	72.76	77.67
PGAL8A_00073000	396	222	56.06	PF3D7_0525700	conserved Plasmodium protein, unknown function		0.0302	0.0696	0.0585	0.0055	0.0486	0.0123	0.0628	0.0628	0.0837	0.0845	0.1068	0.1	0.0796	0.0655	0.1179	0.1189	0.0675	0.1087	0.1072	0.0757	0.067	0.0995	0.0993	0.0919	0.0917	0.0851	0.0836	0.0186	14.422	0.05646	3036	3553	3885	2180	3962	3875	3659	3811	41.38	52.02	86.79	86.79	93.42
PGAL8A_00073100	903	597	66.11	PF3D7_0525800	inner membrane complex protein 1g, putative		0.0424	0.2584	0.1612	0.004	0.2747	0.039	0.2659	0.2626	0.2936	0.3217	0.2779	0.2859	0.288	0.2899	0.3209	0.3483	0.1506	0.2232	0.2394	0.1567	0.1676	0.2252	0.2415	0.1752	0.2122	0.1918	0.2293	0.0423	274.533	0.069	2445	832	2780	2658	1383	2653	782	1362	54.98	35.36	93.11	92.04	50.09
PGAL8A_00073200	879	804	91.47	PF3D7_0525900	NIMA related kinase 2	PfNek-2	0.075	0.179	0.1828	0.003	0.1934	0.035	0.1825	0.1863	0.1716	0.1867	0.1277	0.131	0.1316	0.1382	0.1304	0.1424	0.1792	0.168	0.1844	0.1798	0.1841	0.1719	0.1884	0.1671	0.1743	0.1617	0.1637	0.0146	3.258	0.06526	1111	1707	2533	2943	2228	2862	1652	2218	7.59	10.06	9.85	5.14	68.24
PGAL8A_00073300	1956	831	42.48	PF3D7_0526000	RAP protein, putative		0.1071	0.4194	0.6928	0.0176	0.5229	0.1148	0.4195	0.445	0.4687	0.449	0.4286	0.4366	0.4431	0.5264	0.4548	0.4644	0.6162	0.5944	0.5521	0.6088	0.6729	0.5836	0.5431	0.6219	0.6429	0.6599	0.6566	0.0597	3.044	0.14124	437	193	148	404	288	497	196	377	29.32	54.34	35.47	31.47	48.62
PGAL8A_00073400	1017	330	32.45	PF3D7_0526100	conserved Plasmodium membrane protein, unknown function		0.1831	0.5311	0.5924	0.0208	0.5927	0.0844	0.5157	0.542	0.4445	0.4508	0.4807	0.4821	0.5104	0.5665	0.4825	0.4974	0.6063	0.6199	0.6802	0.572	0.5641	0.6477	0.7026	0.6086	0.5979	0.7169	0.6625	0.0822	3.674	0.18292	79	78	266	265	187	1005	85	200	26.78	33.1	32.73	19.94	67.87
PGAL8A_00073600	969	786	81.11	PF3D7_0526300	WD repeat-containing protein, putative		0.068	0.2406	0.2793	0.0104	0.2084	0.0553	0.2385	0.21	0.2538	0.2435	0.2096	0.2074	0.1773	0.1822	0.219	0.2141	0.2591	0.2802	0.2639	0.2617	0.2772	0.2789	0.2628	0.2482	0.2351	0.2369	0.2254	0.0226	40.777	0.05338	1314	981	1589	1124	2070	1944	996	1937	70.59	59.55	50.06	45.09	65.85
PGAL8A_00073700	1053	675	64.1	PF3D7_0526400	conserved Plasmodium protein, unknown function		0.0741	0.2012	0.2339	0.007	0.2096	0.0403	0.1897	0.1955	0.2975	0.2925	0.162	0.1585	0.1769	0.183	0.2966	0.2899	0.2216	0.3035	0.3139	0.2169	0.2289	0.2989	0.309	0.3061	0.2994	0.3386	0.3319	0.0346	12.289	0.05608	1132	1395	2015	1818	2060	2597	1550	2099	5.8	14.04	31.3	53.06	70.85
PGAL8A_00073800	3546	1776	50.08	PF3D7_0526500	conserved Plasmodium protein, unknown function		0.0417	0.1332	0.2434	0.004	0.1863	0.0516	0.1323	0.194	0.1519	0.1501	0.1324	0.1316	0.1764	0.1743	0.1475	0.1485	0.2403	0.1872	0.1878	0.2356	0.2388	0.1856	0.1862	0.2194	0.2175	0.2103	0.2116	0.0155	90.659	0.04454	2473	2442	1918	2658	2323	2090	2462	2118	83.05	76.03	58.99	44.09	47.45
PGAL8A_00074000	1761	717	40.72	PF3D7_0526700	conserved protein, unknown function		0.0101	0.0671	0.0865	0.0018	0.0694	0.031	0.069	0.0695	0.1099	0.1092	0.0636	0.0654	0.0717	0.0689	0.1056	0.1055	0.0849	0.1236	0.1228	0.0818	0.0831	0.1254	0.1247	0.1345	0.139	0.1216	0.1264	0.0132	47.275	0.0328	3947	3590	3652	3312	3758	3070	3562	3751	60.79	61.29	66.02	60.36	30.36
PGAL8A_00074100	852	312	36.62	PF3D7_0526800	conserved Plasmodium protein, unknown function		0.0248	0.1876	0.3249	0.0001	0.2395	0.0654	0.1869	0.2521	0.1576	0.1573	0.1995	0.2003	0.2391	0.2268	0.1568	0.1597	0.3658	0.1721	0.1784	0.368	0.3269	0.1727	0.1785	0.2609	0.2856	0.253	0.2688	0.0281	22.418	0.06198	3282	1579	1232	3612	1743	1561	1585	1477	94.98	91.22	88.89	74.14	81.77
PGAL8A_00074200	642	480	74.77	PF3D7_0526900	transmembrane emp24 domain-containing protein, putative		0.0452	0.0776	0.0941	0.0054	0.1005	0.0428	0.0835	0.1256	0.2082	0.2055	0.0862	0.0922	0.1357	0.1104	0.2391	0.2259	0.117	0.2393	0.2333	0.1167	0.0939	0.2381	0.2332	0.2426	0.2638	0.2489	0.251	0.0484	137.369	0.05962	2314	3404	3564	2202	3401	2477	3318	3033	96.49	88.02	89.6	84.92	84.16
PGAL8A_00074300	2871	2364	82.34	PF3D7_0527000	DNA replication licensing factor MCM3, putative	PfMCM3	0.0102	0.0248	0.0414	0.0015	0.0326	0.0073	0.0254	0.0314	0.0383	0.0377	0.0275	0.0271	0.0368	0.0384	0.0453	0.0444	0.0407	0.0431	0.0421	0.0402	0.0409	0.0438	0.0427	0.0366	0.0356	0.0375	0.037	0.002	263.152	0.00882	3943	4105	4027	3385	4097	4052	4102	4109	76.68	79.42	97.75	98.2	78.03
PGAL8A_00074400	459	417	90.85	PF3D7_0527100	ubiquitin-conjugating enzyme E2 N, putative	PfUBC13	0.0056	0.0169	0.0391	0.0002	0.0425	0.0032	0.0169	0.0373	0.0386	0.0477	0.0169	0.017	0.0383	0.0436	0.0452	0.0477	0.0351	0.0502	0.0518	0.0354	0.0392	0.0502	0.0511	0.0374	0.0343	0.0426	0.0389	0.0086	84.392	0.00784	4110	4179	4043	3573	4017	4180	4179	4061	95.83	94.84	97.61	98.11	98.2
PGAL8A_00074500	1755	1236	70.43	PF3D7_0527200	ubiquitin carboxyl-terminal hydrolase 14		0.0219	0.1089	0.1697	0.0144	0.1483	0.0256	0.1124	0.1325	0.1402	0.1345	0.1059	0.1116	0.1419	0.1599	0.1359	0.1341	0.1579	0.1475	0.1481	0.1624	0.1753	0.151	0.1538	0.1539	0.1454	0.171	0.1641	0.0243	276.061	0.04754	3420	2846	2677	659	2779	3316	2797	2936	82.81	85.74	88.07	89.75	49.47
PGAL8A_00074600	990	885	89.39	PF3D7_0527300	methionine aminopeptidase 1a, putative		0.0539	0.1095	0.1774	0.0159	0.154	0.0358	0.1113	0.133	0.1231	0.1187	0.1166	0.1153	0.1352	0.1548	0.1348	0.1387	0.1569	0.1336	0.1304	0.1671	0.1819	0.1414	0.1342	0.1511	0.152	0.1709	0.1678	0.021	21.978	0.06818	1917	2835	2599	529	2724	2829	2819	2929	73.15	79.57	77.55	67.65	70.61
PGAL8A_00074700	525	279	53.14	PF3D7_0527400	conserved Plasmodium protein, unknown function		0.079	0.4228	0.5042	0.0207	0.3245	0.0736	0.4303	0.2934	0.6019	0.561	0.3733	0.351	0.3789	0.3488	0.5764	0.5364	0.5392	0.6769	0.6587	0.5486	0.5399	0.6932	0.6696	0.597	0.5401	0.5999	0.5475	0.0318	55.71	0.20226	979	185	434	269	1013	1304	175	1082	89.22	77.24	45.71	38.66	75.43
PGAL8A_00074800	1287	561	43.59	PF3D7_0527500	Hsc70-interacting protein	PfHIP	0.0214	0.0748	0.0728	0.004	0.0588	0.0349	0.0782	0.0628	0.1024	0.0973	0.0687	0.072	0.0647	0.0569	0.091	0.0856	0.0736	0.0926	0.093	0.0757	0.0755	0.0935	0.094	0.1017	0.0965	0.1031	0.0974	0.0081	241.507	0.02746	3441	3452	3765	2658	3857	2866	3395	3811	98.23	98.6	98.56	99.01	94.33
PGAL8A_00074900	1377	795	57.73	PF3D7_0527600	conserved Plasmodium protein, unknown function		0.2248	0.3274	0.612	0.0072	0.6767	0.1918	0.3336	0.7548	0.7718	0.7513	0.3138	0.3103	0.7036	0.6601	0.8503	0.7753	0.6785	0.7258	0.7242	0.6683	0.6135	0.7357	0.7405	1.1653	1.1623	1.1257	1.1108	0.0587	60.287	0.3638	45	433	237	1776	106	55	416	47	48.07	68.93	79.8	76.34	62.74
PGAL8A_00075200	1953	1485	76.04	PF3D7_0527900	ATP-dependent RNA helicase DDX41, putative		0.0072	0.0349	0.0507	0.0016	0.043	0.0084	0.034	0.0424	0.0619	0.0575	0.0357	0.0348	0.0364	0.0359	0.0568	0.0525	0.0446	0.0659	0.0595	0.0458	0.052	0.0653	0.0588	0.0658	0.0591	0.068	0.061	0.0065	39.445	0.0078	4054	4013	3957	3361	4008	4018	4019	4017	89.37	84.18	76.22	50.96	48.07
PGAL8A_00075300	375	372	99.2	PF3D7_0528000	proteasome maturation factor UMP1, putative		0.0388	0.1084	0.2094	0.0158	0.1383	0.0738	0.1132	0.1229	0.1246	0.1147	0.1099	0.1032	0.1145	0.1447	0.1247	0.1235	0.1929	0.1516	0.146	0.18	0.1943	0.1511	0.1498	0.1464	0.1564	0.1449	0.1519	0.0068	69.036	0.11956	2596	2852	2256	537	2909	1297	2788	3071	59.88	69.53	66.11	69.95	77.74
PGAL8A_00075400	2769	2193	79.2	PF3D7_0528100	AP-1 complex subunit beta, putative		0.0123	0.0253	0.0247	0.0011	0.0255	0.0083	0.0258	0.0269	0.0598	0.06	0.0252	0.0253	0.0295	0.0268	0.0588	0.0596	0.0269	0.0606	0.0595	0.0258	0.0235	0.0592	0.058	0.0552	0.0538	0.057	0.0563	0.0083	183.937	0.0086	3864	4099	4153	3476	4147	4022	4099	4140	87.4	86.78	86.76	87.1	56.05
PGAL8A_00075500	1548	1179	76.16	PF3D7_0528200	eukaryotic translation initiation factor 3 subunit E, putative		0.0169	0.094	0.1314	0.0082	0.106	0.0249	0.089	0.0979	0.0952	0.0905	0.0959	0.0915	0.1	0.1116	0.0985	0.0971	0.1179	0.1129	0.1106	0.1149	0.1286	0.109	0.1071	0.1049	0.1037	0.1096	0.112	0.0084	142.252	0.03028	3657	3130	3109	1567	3333	3346	3214	3401	89.74	88.37	84.37	67.73	71.92
PGAL8A_00075600	1542	948	61.48	PF3D7_0528300	conserved Plasmodium protein, unknown function		0.0832	0.254	0.3156	0.0088	0.3025	0.081	0.2585	0.279	0.2632	0.2673	0.2533	0.2553	0.2745	0.2975	0.2507	0.2569	0.2998	0.289	0.3081	0.2973	0.3128	0.2954	0.3148	0.2791	0.2876	0.2896	0.3046	0.0406	36.919	0.12554	877	870	1308	1438	1157	1091	831	1208	10.22	14.77	42.69	59.62	13.43
PGAL8A_00075700	1209	597	49.38	PF3D7_0528400	palmitoyltransferase DHHC7		0.0781	0.0985	0.1321	0.0081	0.1377	0.0155	0.098	0.1353	0.2071	0.2116	0.1401	0.1354	0.1681	0.1788	0.2211	0.2261	0.1236	0.1844	0.1928	0.1156	0.1235	0.1798	0.1879	0.1962	0.2007	0.1968	0.2019	0.0061	61.39	0.06004	1013	3045	3102	1586	2919	3757	3066	2893	30.67	20.13	74.73	87.23	54.28
PGAL8A_00075800	909	861	94.72	PF3D7_0528500	F-actin-capping protein subunit alpha, putative		0.0661	0.3011	0.3216	0.0138	0.2149	0.051	0.3085	0.2048	0.253	0.2344	0.2482	0.2551	0.2087	0.2116	0.2538	0.2345	0.3222	0.335	0.3384	0.3433	0.3406	0.354	0.3569	0.2774	0.28	0.2761	0.2893	0.0335	22.414	0.09698	1402	553	1256	718	1996	2110	524	1999	62.45	44.45	58.06	59.96	85.77
PGAL8A_00076000	609	513	84.24	PF3D7_0528700	peptidyl-prolyl cis-trans isomerase		0.0219	0.0545	0.0713	0.0024	0.0724	0.016	0.057	0.0685	0.075	0.0741	0.0492	0.0516	0.0522	0.0595	0.0764	0.075	0.0653	0.073	0.0717	0.0681	0.0741	0.0757	0.0744	0.0707	0.0679	0.0593	0.062	0.0024	24.956	0.03246	3420	3775	3778	3128	3737	3730	3751	3761	91.03	89.35	90.88	81.03	97.73
PGAL8A_00076100	1449	765	52.8	PF3D7_0528800	nucleolar preribosomal GTPase, putative		0.0772	0.3155	0.4716	0.0111	0.4198	0.1045	0.3144	0.3964	0.2945	0.2991	0.2982	0.2966	0.418	0.453	0.2953	0.3171	0.458	0.3818	0.3642	0.4537	0.4785	0.3887	0.3715	0.4102	0.4025	0.4631	0.4481	0.0473	14.131	0.10384	1046	490	517	1026	520	647	496	520	72.17	68.79	29.62	11.96	28.3
PGAL8A_00076200	696	582	83.62	PF3D7_0528900	conserved Plasmodium protein, unknown function		0.0457	0.1569	0.2317	0.0188	0.1715	0.0299	0.1697	0.1448	0.2269	0.2105	0.1597	0.1713	0.1509	0.1776	0.2496	0.2326	0.2078	0.239	0.2347	0.2218	0.2493	0.2653	0.2559	0.2405	0.2237	0.2531	0.2357	0.035	14.388	0.1007	2289	2053	2037	346	2512	3115	1849	2774	67.44	38.41	15.08	16.06	87.64
PGAL8A_00076300	2118	1710	80.74	PF3D7_0529000	conserved Plasmodium protein, unknown function		0.0414	0.094	0.0954	0.0007	0.1308	0.0323	0.0941	0.1404	0.1626	0.1511	0.0941	0.094	0.148	0.1411	0.1571	0.144	0.1064	0.1487	0.1326	0.1054	0.0965	0.1487	0.1325	0.1572	0.1469	0.1627	0.1517	0.0231	11.551	0.02204	2487	3130	3551	3549	3019	3007	3124	2830	75.49	78.73	72.89	68.55	30.12
PGAL8A_00076400	489	219	44.79	PF3D7_0529100	thioredoxin-like protein, putative		0.0299	0.0718	0.091	0	0.0827	0.011	0.072	0.0763	0.0849	0.0849	0.0482	0.0483	0.091	0.0972	0.0751	0.0753	0.0847	0.0643	0.0639	0.0847	0.0914	0.0641	0.0638	0.0881	0.0878	0.079	0.0789	0.0004	24.645	0.01198	3047	3506	3601	3943	3617	3924	3508	3674	28.8	49.06	58.8	62.04	89.7
PGAL8A_00076600	837	534	63.8	PF3D7_0529300	apicoplast TIC22 protein	PfTIC22	0.1118	0.2491	0.2379	0.0111	0.2106	0.0575	0.2352	0.1775	0.2519	0.2311	0.2098	0.1991	0.1516	0.1816	0.2145	0.2035	0.2066	0.2196	0.2202	0.202	0.2283	0.2058	0.2061	0.2125	0.202	0.2325	0.2157	0.0326	15.573	0.09726	384	900	1974	1026	2047	1852	1030	2339	32.14	43.65	48.73	46.36	40.36
PGAL8A_00076800	543	495	91.16	PF3D7_0529500	cell cycle regulator protein, putative		0.0099	0.059	0.0524	0.0001	0.0798	0.0113	0.0592	0.0757	0.1079	0.1131	0.0596	0.0599	0.0716	0.0692	0.0974	0.1031	0.054	0.0694	0.0748	0.0543	0.0526	0.0698	0.0754	0.0746	0.0811	0.0649	0.0721	0.0051	51.714	0.01478	3951	3721	3949	3612	3651	3915	3716	3682	81.53	76.94	77.79	68.37	91.21
PGAL8A_00077000	2517	1809	71.87	PF3D7_0529700	conserved Plasmodium protein, unknown function		0.0642	0.2173	0.3234	0.0186	0.2626	0.0803	0.2186	0.2611	0.2219	0.2122	0.2091	0.2141	0.2452	0.2405	0.2156	0.2053	0.3029	0.2877	0.2792	0.2969	0.3171	0.2848	0.2769	0.2821	0.2733	0.2869	0.2805	0.0197	21.805	0.07844	1490	1212	1242	358	1483	1109	1208	1384	4.83	25.04	20.01	22.14	16.06
PGAL8A_00077100	5082	1695	33.35	PF3D7_0529800	conserved Plasmodium protein, unknown function		0.0602	0.2017	0.2474	0.0115	0.2133	0.0526	0.198	0.2325	0.2498	0.2508	0.1999	0.1984	0.232	0.2309	0.2428	0.2419	0.2367	0.2833	0.2904	0.2364	0.2414	0.2855	0.2923	0.2915	0.3038	0.2821	0.2948	0.0256	78.739	0.0397	1645	1392	1885	970	2016	2048	1436	1671	24.1	37.32	52.43	58.59	43.83
PGAL8A_00077200	771	681	88.33	PF3D7_0529900	RING zinc finger protein, putative		0.0094	0.0518	0.0677	0.0018	0.0656	0.0061	0.0498	0.0683	0.0652	0.065	0.0533	0.0514	0.0643	0.0618	0.0566	0.0566	0.0694	0.0516	0.0521	0.0676	0.066	0.05	0.0504	0.0688	0.0687	0.0663	0.0658	0.0058	44.811	0.02102	3967	3808	3803	3312	3792	4086	3831	3764	92.66	88.13	90.89	93.44	93.02
PGAL8A_00077400	879	732	83.28	PF3D7_0801300	von Willebrand factor A domain-related protein		0.0736	0.1903	0.2079	0.0149	0.1865	0.0716	0.1848	0.159	0.178	0.183	0.1858	0.1849	0.1573	0.1838	0.1863	0.2056	0.2044	0.233	0.254	0.2008	0.2009	0.2274	0.2437	0.2073	0.1972	0.2145	0.2346	0.0633	6.256	0.1519	1148	1534	2275	617	2321	1368	1611	2584	39.09	26.74	21.05	23.51	75.77
PGAL8A_00077700	1617	1194	73.84	PF3D7_0801500	nucleolar protein 10, putative		0.0196	0.0977	0.1853	0.0029	0.1712	0.0369	0.0985	0.1574	0.0982	0.1019	0.0919	0.0954	0.1562	0.1751	0.0996	0.1025	0.1758	0.1113	0.1107	0.1783	0.1876	0.1128	0.1109	0.1632	0.1567	0.1729	0.167	0.0129	20.335	0.01712	3538	3062	2505	2972	2516	2753	3051	2608	77.57	76.25	41.28	26.05	21.29
PGAL8A_00077800	372	261	70.16	PF3D7_0801600	conserved Plasmodium protein, unknown function		0.0048	0.0627	0.0884	0	0.043	0.0146	0.0632	0.0292	0.047	0.0406	0.0551	0.0552	0.0223	0.0364	0.0538	0.0471	0.0804	0.1019	0.0942	0.0806	0.0885	0.1024	0.0948	0.0451	0.0392	0.0603	0.0542	0.005	168.494	0.00842	4138	3662	3628	3943	4008	3795	3654	4124	3.96	29.05	52.21	40.5	90.62
PGAL8A_00077900	4962	1509	30.41	PF3D7_0801700	sentrin-specific protease 2, putative		0.046	0.2047	0.3959	0.0155	0.3558	0.113	0.2084	0.3002	0.2638	0.2612	0.213	0.2171	0.3046	0.356	0.271	0.266	0.3769	0.3027	0.3001	0.3832	0.4023	0.3026	0.3031	0.3904	0.3882	0.442	0.4537	0.0318	41.824	0.08474	2272	1348	822	565	817	525	1312	1048	55.13	75.58	63.15	53.57	40.21
PGAL8A_00078000	2313	1245	53.83	PF3D7_0801800	mannose-6-phosphate isomerase, putative		0.0701	0.1267	0.1675	0.001	0.2255	0.0637	0.1252	0.2198	0.1984	0.1861	0.1304	0.1288	0.2367	0.2379	0.204	0.1886	0.175	0.1605	0.1573	0.1731	0.1656	0.1589	0.1558	0.1985	0.193	0.2191	0.2129	0.0196	43.72	0.026	1254	2548	2705	3496	1878	1619	2579	1822	90.65	96.31	91.73	86.72	68.72
PGAL8A_00078100	10176	2646	26	PF3D7_0801900	conserved Plasmodium protein, unknown function		0.0745	0.3556	0.6194	0.0198	0.5339	0.1549	0.3427	0.4922	0.3648	0.3623	0.3449	0.3383	0.5025	0.5321	0.3688	0.3718	0.5874	0.4697	0.4581	0.5714	0.6012	0.4617	0.4488	0.5481	0.5416	0.5867	0.5778	0.0231	37.731	0.08498	1121	347	226	307	271	158	384	265	70.38	71.49	31.26	26.17	36.99
PGAL8A_00078200	3513	2592	73.78	PF3D7_0802000	glutamate dehydrogenase, putative	GDHc	0.0578	0.1127	0.1209	0.0091	0.141	0.0419	0.1137	0.1366	0.135	0.1317	0.1135	0.1129	0.1437	0.1422	0.1382	0.1362	0.1162	0.1266	0.1251	0.1148	0.1196	0.1277	0.1263	0.1486	0.1481	0.1577	0.1569	0.0109	67.941	0.0297	1732	2789	3234	1374	2877	2515	2783	2877	91.17	96.47	94.86	87.45	71.02
PGAL8A_00078300	8124	1002	12.33	PF3D7_0802100	AP2 domain transcription factor, putative		0.1211	0.5531	0.8893	0.0302	0.931	0.214	0.5531	0.8895	0.6155	0.6045	0.5492	0.5472	0.8669	0.9191	0.5715	0.5612	0.8518	0.6506	0.6422	0.8555	0.8838	0.6508	0.6504	0.9284	0.9769	0.9218	0.9604	0.043	94.107	0.20438	295	64	47	65	24	29	67	25	37.89	32.13	80.04	88.25	61.55
PGAL8A_00078400	669	624	93.27	PF3D7_0802200	1-cys peroxiredoxin	1-CysPrx	0.0426	0.1259	0.1378	0.0019	0.1799	0.0409	0.1281	0.1654	0.1605	0.1449	0.1117	0.114	0.1621	0.1763	0.1404	0.1251	0.1418	0.12	0.1095	0.1397	0.1357	0.1181	0.1076	0.1799	0.1656	0.1787	0.1692	0.0299	279.347	0.02948	2438	2559	3040	3277	2395	2565	2528	2504	56.92	89.25	96.16	87.42	86.31
PGAL8A_00078500	3165	2538	80.19	PF3D7_0802300	periodic tryptophan protein 2, putative	UTP1	0.019	0.0676	0.1824	0.0053	0.1733	0.0533	0.0653	0.1369	0.0939	0.0954	0.0624	0.0612	0.1363	0.1717	0.0888	0.0902	0.1592	0.1056	0.1071	0.158	0.1842	0.104	0.1067	0.1799	0.1848	0.2097	0.2125	0.0154	20.194	0.02508	3560	3584	2537	2261	2490	2026	3617	2875	86.13	86.12	62.06	45.46	57.76
PGAL8A_00078600	3375	1005	29.78	PF3D7_0802400	conserved Plasmodium protein, unknown function		0.0857	0.2597	0.4419	0.0071	0.4938	0.127	0.2603	0.43	0.3281	0.3235	0.2534	0.2542	0.4237	0.4628	0.3349	0.322	0.4315	0.3667	0.3515	0.4402	0.4506	0.3713	0.3557	0.4898	0.4778	0.5249	0.5115	0.034	24.714	0.08068	818	823	621	1799	341	351	821	425	80.54	82.9	72.36	47.07	63.94
PGAL8A_00078700	3690	2091	56.67	PF3D7_0802500	inositol 5-phosphatase, putative		0.0631	0.2204	0.3847	0.0121	0.3862	0.0958	0.2183	0.3526	0.2488	0.2499	0.2162	0.2183	0.3378	0.3757	0.2466	0.2506	0.3616	0.2754	0.2806	0.3616	0.3871	0.2754	0.2801	0.3945	0.3934	0.4164	0.4184	0.0412	27.379	0.04274	1523	1184	882	889	672	771	1210	715	60.91	52.47	38.29	61.4	31.4
PGAL8A_00078800	5289	2658	50.26	PF3D7_0802600	adenylyl cyclase beta	PfACbeta	0.0346	0.1123	0.1947	0.0054	0.17	0.056	0.1157	0.1697	0.1432	0.1456	0.1178	0.1205	0.1788	0.1744	0.1483	0.147	0.1951	0.1708	0.1724	0.1953	0.1959	0.1716	0.1734	0.207	0.2074	0.2078	0.209	0.0215	27.927	0.02932	2822	2798	2400	2202	2534	1920	2747	2450	46.65	41.23	76.82	93.01	64.71
PGAL8A_00078900	1224	447	36.52	PF3D7_0802700	conserved Plasmodium protein, unknown function		0.1208	0.3519	0.8035	0.0079	0.4065	0.1238	0.3495	0.3746	0.4365	0.4608	0.3488	0.3609	0.4582	0.5035	0.4726	0.4794	0.659	0.5666	0.5473	0.6597	0.7912	0.533	0.5214	0.7	0.694	0.7967	0.7393	0.0509	5.251	0.22216	299	358	76	1621	578	387	360	606	24.61	6.44	12.58	16.61	11.62
PGAL8A_00079000	1584	1377	86.93	PF3D7_0802800	serine/threonine protein phosphatase 2B catalytic subunit A	PfCNA	0.0069	0.0162	0.0308	0.0001	0.0327	0.0086	0.0162	0.0327	0.0393	0.0403	0.0162	0.0161	0.032	0.0318	0.0407	0.0415	0.0293	0.042	0.0426	0.0293	0.0308	0.0419	0.0426	0.0505	0.0512	0.0528	0.0515	0.0142	40.211	0.00468	4064	4188	4119	3612	4096	4012	4189	4096	42.98	23.49	87.12	94.91	61.09
PGAL8A_00079100	396	318	80.3	PF3D7_0802900	conserved Plasmodium protein, unknown function		0.0289	0.2104	0.3795	0.0108	0.3445	0.0948	0.2002	0.2432	0.2374	0.2515	0.2303	0.2195	0.2721	0.3571	0.2467	0.2571	0.3302	0.3307	0.3434	0.3243	0.3741	0.3184	0.3226	0.3715	0.3675	0.4806	0.4862	0.0746	35.24	0.05926	3092	1292	914	1072	886	790	1413	1563	44.63	27.7	32.49	20.01	91.33
PGAL8A_00079200	1956	933	47.7	PF3D7_0803000	peptidyl-prolyl cis-trans isomerase		0.0577	0.2305	0.4239	0.0115	0.3251	0.0912	0.2304	0.2794	0.1834	0.1956	0.2415	0.2415	0.278	0.3308	0.1726	0.1952	0.3876	0.2399	0.2447	0.3977	0.4392	0.2379	0.24	0.3274	0.3264	0.3592	0.3592	0.0353	48.337	0.04816	1737	1072	696	970	1006	861	1074	1205	76.27	68.98	68.43	54.56	51.41
PGAL8A_00079300	3138	849	27.06	PF3D7_0803100	U3 small nucleolar RNA-associated protein 14, putative		0.0673	0.2742	0.535	0.015	0.3963	0.0949	0.2677	0.3632	0.2372	0.2332	0.265	0.253	0.3824	0.4069	0.2365	0.2313	0.5033	0.3293	0.3232	0.4982	0.525	0.3117	0.3077	0.4095	0.3823	0.4359	0.4159	0.0402	34.424	0.05174	1349	720	364	607	626	789	768	666	84.63	81.72	52.24	36.96	44.56
PGAL8A_00079400	1545	810	52.43	PF3D7_0803200	filament assembling protein, putative		0.0167	0.1149	0.2733	0.0131	0.1935	0.0726	0.1166	0.1658	0.1372	0.1311	0.1195	0.1212	0.1756	0.205	0.1326	0.1266	0.2332	0.1907	0.1885	0.2367	0.2808	0.1881	0.1855	0.2259	0.2192	0.2744	0.2615	0.0159	43.813	0.02816	3670	2753	1636	781	2226	1337	2729	2496	36.57	34.76	83.69	92.75	75.68
PGAL8A_00079500	1095	978	89.32	PF3D7_0803300	mitogen-activated protein kinase organizer 1, putative // WD repeat domain-containing protein 83, putative	WDR83	0.0354	0.0902	0.2023	0.0012	0.2127	0.063	0.0921	0.1667	0.1372	0.1367	0.0847	0.0865	0.1692	0.2047	0.1398	0.1342	0.1751	0.1549	0.148	0.1776	0.2044	0.1571	0.1501	0.1924	0.1901	0.2243	0.2252	0.0207	63.068	0.04672	2772	3187	2337	3456	2023	1639	3159	2485	22.07	37.11	58.56	55.12	47.46
PGAL8A_00079600	3096	2166	69.96	PF3D7_0803400	DNA repair and recombination protein RAD54, putative		0.0164	0.0573	0.0969	0.0022	0.0797	0.0402	0.0587	0.0699	0.0741	0.0733	0.0555	0.0568	0.0698	0.077	0.074	0.0732	0.0824	0.0811	0.0815	0.0831	0.0969	0.0808	0.0812	0.0874	0.0837	0.0901	0.088	0.0038	102.543	0.01264	3681	3740	3534	3188	3655	2605	3729	3746	56.05	65.15	93.02	96.19	69.76
PGAL8A_00079700	2976	1464	49.19	PF3D7_0803500	AAA family ATPase, putative		0.0486	0.2268	0.3872	0.0177	0.3099	0.1035	0.2224	0.2744	0.2569	0.2624	0.2304	0.2303	0.2831	0.3296	0.2745	0.2779	0.3406	0.3102	0.3216	0.3423	0.385	0.2999	0.3183	0.3441	0.3427	0.4163	0.4156	0.0737	32.481	0.04612	2155	1115	871	399	1110	661	1167	1257	55.1	65.19	54.39	62.61	40.75
PGAL8A_00080000	1359	1320	97.13	PF3D7_0803700	tubulin gamma chain		0.0018	0.0098	0.0202	0.0009	0.0158	0.002	0.0108	0.013	0.0071	0.0079	0.01	0.0109	0.0118	0.0147	0.0071	0.008	0.0182	0.0107	0.0116	0.0193	0.0216	0.0117	0.0126	0.0171	0.018	0.0183	0.0191	0.0009	155.477	0.00372	4223	4238	4183	3521	4221	4206	4226	4235	57	60.07	78.74	71.21	79.47
PGAL8A_00080100	771	726	94.16	PF3D7_0803800	proteasome subunit beta type-4		0.0226	0.0856	0.1372	0.0001	0.0953	0.0254	0.0853	0.0866	0.0581	0.064	0.0881	0.0879	0.0899	0.1045	0.0747	0.081	0.1252	0.1125	0.1094	0.125	0.1371	0.1121	0.1092	0.0774	0.0803	0.0894	0.0925	0.0051	111.62	0.01112	3385	3277	3050	3612	3459	3325	3288	3536	94.39	93.56	95.97	95.93	95.46
PGAL8A_00080300	1629	999	61.33	PF3D7_0804000	cactin homolog, putative		0.0358	0.1945	0.273	0.0082	0.2116	0.0623	0.1926	0.2176	0.1692	0.1795	0.2022	0.2029	0.209	0.2095	0.1637	0.1752	0.2801	0.2427	0.231	0.2809	0.2742	0.2477	0.2359	0.2384	0.2347	0.2181	0.217	0.0313	113.704	0.03378	2758	1480	1640	1567	2036	1668	1512	1846	92	90.32	78.12	86.07	50.06
PGAL8A_00080400	2433	522	21.45	PF3D7_0804300	zinc finger protein, putative		0.1358	0.4012	0.741	0.0253	0.6704	0.2043	0.3991	0.6493	0.3909	0.4096	0.4055	0.4025	0.7109	0.7706	0.4174	0.4164	0.6585	0.4499	0.437	0.6372	0.7494	0.4575	0.4429	0.6072	0.6222	0.6759	0.6565	0.0571	5.092	0.11594	193	234	110	134	110	37	236	95	89.77	82.45	51.15	36.11	45.9
PGAL8A_00080500	1863	1338	71.82	PF3D7_0804400	methionine aminopeptidase 1c, putative	PfMetAP1c	0.0632	0.1335	0.2188	0.0086	0.1894	0.0679	0.1374	0.1765	0.1188	0.116	0.1372	0.1363	0.1805	0.2004	0.1103	0.1068	0.1895	0.1535	0.1511	0.1883	0.2212	0.1554	0.1504	0.1645	0.1633	0.1854	0.1855	0.0089	40.971	0.02352	1518	2437	2166	1492	2286	1476	2382	2352	55.55	42.32	60.43	69.08	34.41
PGAL8A_00080600	13998	4752	33.95	PF3D7_0804500	conserved Plasmodium membrane protein, unknown function		0.0646	0.2104	0.4283	0.0093	0.4197	0.124	0.2133	0.3721	0.2366	0.2328	0.2088	0.2108	0.3636	0.4058	0.2323	0.226	0.3939	0.2716	0.2718	0.3906	0.428	0.2737	0.2732	0.4067	0.3976	0.4368	0.4261	0.0229	55.799	0.06178	1473	1292	678	1338	521	384	1266	621	58.4	73.91	62.32	67.09	47.12
PGAL8A_00080700	1728	807	46.7	PF3D7_0804600	tRNA pseudouridine synthase, putative		0.034	0.1223	0.2072	0.0043	0.2022	0.0558	0.1168	0.1772	0.1233	0.1274	0.1299	0.1265	0.1648	0.1854	0.1221	0.1233	0.1715	0.1378	0.1375	0.1715	0.2072	0.1344	0.1342	0.1799	0.1822	0.2085	0.2046	0.0136	25.513	0.0278	2853	2633	2285	2565	2135	1929	2724	2344	72.48	64.81	43.64	29.46	25.55
PGAL8A_00080900	648	510	78.7	PF3D7_0804800	peptidyl-prolyl cis-trans isomerase	PfCyP24	0.0072	0.037	0.0507	0.0001	0.0255	0.0104	0.0369	0.0256	0.0359	0.0354	0.0358	0.0358	0.0313	0.0295	0.0399	0.0395	0.0447	0.0464	0.0427	0.0447	0.0511	0.0465	0.0433	0.0316	0.0313	0.0341	0.034	0.0024	464.036	0.00624	4054	3986	3957	3612	4147	3941	3988	4153	82.12	68.89	59.58	40.72	69.95
PGAL8A_00081000	1263	702	55.58	PF3D7_0804900	GTPase-activating protein, putative		0.0184	0.0748	0.1062	0.0033	0.0853	0.0175	0.0744	0.096	0.101	0.1016	0.075	0.0746	0.0931	0.0831	0.1083	0.1084	0.1147	0.11	0.1097	0.1195	0.1108	0.114	0.1136	0.131	0.1306	0.1273	0.1268	0.0038	119.249	0.05592	3590	3452	3422	2843	3585	3659	3471	3425	79.4	76.7	80.23	78.01	47.64
PGAL8A_00081100	735	729	99.18	PF3D7_0805000	alpha/beta hydrolase, putative		0.0397	0.0852	0.1401	0.0049	0.1606	0.0268	0.0844	0.1736	0.1474	0.1537	0.067	0.0663	0.1526	0.1408	0.1446	0.1508	0.1559	0.1307	0.1365	0.1533	0.1379	0.1265	0.1322	0.1873	0.1864	0.1925	0.1935	0.0143	34.227	0.07196	2558	3289	3015	2382	2642	3267	3306	2397	53.83	39.14	68.25	68.77	83.97
PGAL8A_00081200	1518	813	53.56	PF3D7_0805100	conserved Plasmodium protein, unknown function		0.05	0.1551	0.2361	0.0063	0.2442	0.0401	0.1566	0.2225	0.2203	0.2234	0.1608	0.1624	0.2012	0.2299	0.2103	0.2083	0.2251	0.2394	0.2452	0.227	0.2444	0.2422	0.2475	0.245	0.2462	0.2667	0.2702	0.0159	52.334	0.15266	2099	2082	2000	1967	1676	2609	2068	1791	9.47	14.54	35.19	44.85	38.86
PGAL8A_00081300	282	273	96.81	PF3D7_0805200	gamete release protein, putative // IMC-associated apicomplexan protein, putative	IAAP	0.077	0.2149	0.1888	0	0.2156	0.0463	0.2147	0.2314	0.2298	0.2236	0.2101	0.2098	0.1998	0.1858	0.2532	0.2334	0.1721	0.219	0.1945	0.1714	0.1885	0.2186	0.195	0.2027	0.2014	0.2157	0.2081	0.0395	30.238	0.13144	1054	1236	2462	3943	1982	2325	1252	1682	73.91	7.18	92.83	77.36	94.18
PGAL8A_00081400	3927	1263	32.16	PF3D7_0805300	conserved Plasmodium protein, unknown function		0.1408	0.4068	0.4684	0.0121	0.3679	0.0807	0.3956	0.3461	0.3861	0.3738	0.4141	0.3987	0.3678	0.381	0.412	0.4087	0.4483	0.4348	0.438	0.4293	0.451	0.426	0.4293	0.4496	0.443	0.495	0.488	0.0197	16.308	0.28316	174	214	521	889	758	1101	243	753	6.96	10.47	18.42	31.19	15.34
PGAL8A_00081500	7662	6120	79.87	PF3D7_0718300	cysteine repeat modular protein 2	PfCRMP2	0.0564	0.1359	0.1926	0.0053	0.1962	0.0438	0.1355	0.1948	0.1849	0.1813	0.1318	0.1308	0.1846	0.1887	0.1811	0.1781	0.1909	0.1809	0.1784	0.1893	0.1916	0.1823	0.1801	0.2111	0.207	0.213	0.213	0.0283	0.518	0.1045	1807	2405	2423	2261	2205	2439	2408	2108	3.55	4.18	5.71	10.54	4.33
PGAL8A_00081600	390	384	98.46	PF3D7_0718400	mitochondrial ribosomal protein S8 precursor, putative		0.0006	0.0063	0.0153	0.0033	0.0142	0.007	0.0031	0.0069	0.0033	0.0066	0.0064	0.0032	0.007	0.0141	0.0033	0.0066	0.0146	0.01	0.0134	0.0109	0.0114	0.0067	0.0101	0.0052	0.0076	0.0114	0.0154	0.0032	34.794	0.01268	4259	4258	4221	2843	4234	4061	4276	4265	80.86	93.16	96.62	97.07	97.4
PGAL8A_00081700	570	507	88.95	PF3D7_0718500	prefoldin subunit 3, putative		0.0222	0.098	0.1233	0.0091	0.0627	0.0053	0.0945	0.0549	0.0409	0.0389	0.0969	0.0936	0.0663	0.0605	0.0502	0.0486	0.1222	0.0993	0.0965	0.1197	0.121	0.0964	0.0941	0.0528	0.0571	0.0602	0.0643	0.0026	122.938	0.04252	3407	3054	3204	1374	3815	4120	3116	3894	71.13	85.63	86.62	84.04	95.76
PGAL8A_00081800	4083	1110	27.19	PF3D7_0718600	conserved Plasmodium protein, unknown function		0.1353	0.3146	0.4788	0.0195	0.4174	0.1052	0.3198	0.3837	0.3543	0.3685	0.3117	0.3085	0.3539	0.3666	0.3276	0.3403	0.4561	0.4397	0.4497	0.4475	0.4796	0.4285	0.439	0.4682	0.4962	0.4696	0.4832	0.0285	23.382	0.1699	194	494	497	316	530	635	469	569	32.57	33.39	26.69	52.48	24.93
PGAL8A_00081900	1365	648	47.47	PF3D7_0718700	conserved Plasmodium membrane protein, unknown function		0.0576	0.1992	0.3572	0.0092	0.2584	0.0947	0.1957	0.2125	0.2164	0.214	0.2018	0.198	0.2268	0.2777	0.2283	0.2192	0.3045	0.2721	0.2571	0.2975	0.3505	0.2721	0.2571	0.2936	0.2937	0.3366	0.3347	0.0207	12.471	0.10372	1744	1420	1037	1357	1534	793	1460	1909	8.93	26.71	22.55	28.65	37.15
PGAL8A_00082000	822	540	65.69	PF3D7_0718800	conserved Plasmodium protein, unknown function		0.0169	0.0844	0.1135	0.0023	0.1116	0.0379	0.0876	0.1215	0.1099	0.109	0.0932	0.0967	0.1336	0.1223	0.1232	0.1225	0.1317	0.1005	0.1071	0.1356	0.1173	0.1027	0.1093	0.1151	0.117	0.101	0.1031	0.01	1.723	0.0261	3657	3305	3334	3154	3268	2708	3237	3094	23.01	7.51	14.32	5.14	57.64
PGAL8A_00082200	570	291	51.05	PF3D7_0719000	conserved Plasmodium protein, unknown function		0.0413	0.2117	0.2906	0.0077	0.2845	0.0914	0.2042	0.2414	0.1995	0.2069	0.2138	0.205	0.2474	0.2583	0.2023	0.2072	0.2682	0.2063	0.2114	0.2672	0.2945	0.2038	0.209	0.284	0.2758	0.2666	0.2601	0.0039	14.67	0.05048	2493	1275	1511	1669	1294	854	1354	1587	43.71	50.16	32.98	5.14	79.84
PGAL8A_00082300	540	420	77.78	PF3D7_0719100	conserved Plasmodium protein, unknown function		0.0211	0.1392	0.1641	0.006	0.1863	0.0217	0.1318	0.1743	0.1221	0.1218	0.1406	0.1331	0.1694	0.1812	0.1218	0.1218	0.1756	0.1328	0.1325	0.1813	0.1699	0.1286	0.1284	0.1504	0.1501	0.1637	0.1636	0.0001	61.315	0.0653	3458	2360	2744	2051	2323	3484	2472	2389	67.37	52.15	61.21	61.43	90.55
PGAL8A_00082400	933	930	99.68	PF3D7_0719200	NIMA related kinase 4		0.0108	0.0187	0.0227	0	0.04	0.0083	0.0186	0.0364	0.0237	0.0238	0.0145	0.0145	0.0294	0.0326	0.0189	0.0189	0.0209	0.0168	0.0166	0.0209	0.0227	0.0167	0.0165	0.0318	0.0318	0.0338	0.0336	0.0003	72.063	0.00816	3929	4168	4168	3943	4042	4022	4165	4070	21.27	36.65	20.62	14.21	76.44
PGAL8A_00082500	2622	1500	57.21	PF3D7_0719300	actin-related protein, putative		0.0176	0.116	0.1799	0.0032	0.1524	0.0715	0.114	0.1182	0.0757	0.0805	0.1225	0.1194	0.1141	0.1478	0.0754	0.0813	0.1578	0.1282	0.1282	0.1559	0.1801	0.1275	0.1296	0.1231	0.1315	0.1471	0.1619	0.0243	188.336	0.0227	3626	2737	2569	2874	2741	1371	2774	3150	81.96	80.61	71.47	54.35	50.37
PGAL8A_00082600	3855	1374	35.64	PF3D7_0719400	conserved Plasmodium protein, unknown function		0.0791	0.2726	0.627	0.0156	0.5851	0.1614	0.2763	0.5151	0.3601	0.3747	0.2965	0.2972	0.5281	0.552	0.3999	0.4141	0.6068	0.4686	0.475	0.6023	0.6238	0.4737	0.4859	0.6708	0.6791	0.7216	0.7278	0.1029	32.074	0.07592	977	734	210	557	194	129	710	230	35.69	42.2	65.67	79.04	68.22
PGAL8A_00082700	1656	747	45.11	PF3D7_0719500	LEM3/CDC50 family protein, putative		0.0535	0.1541	0.2308	0.0094	0.2281	0.0854	0.1493	0.2248	0.1743	0.2039	0.1481	0.144	0.2088	0.2228	0.155	0.1758	0.2201	0.1803	0.171	0.2207	0.2304	0.177	0.173	0.2201	0.229	0.223	0.2361	0.0364	26.497	0.03374	1937	2096	2044	1327	1853	989	2177	1752	43.88	48.55	71.72	83.8	70.75
PGAL8A_00082800	522	450	86.21	PF3D7_0719600	60S ribosomal protein L11a, putative		0.0026	0.0105	0.0185	0.0001	0.0171	0.0031	0.0105	0.0195	0.0104	0.0104	0.0079	0.0079	0.0162	0.0157	0.0081	0.0079	0.0191	0.0108	0.0106	0.0191	0.0185	0.0107	0.0106	0.0144	0.0143	0.0113	0.0113	0.0004	1711.02	0.00144	4197	4232	4196	3612	4210	4184	4232	4200	97.92	98.94	97.87	97.47	95.97
PGAL8A_00082900	414	405	97.83	PF3D7_0719700	40S ribosomal protein S10, putative		0.023	0.0453	0.07	0.0029	0.0684	0.0128	0.0484	0.062	0.0457	0.0454	0.0356	0.0387	0.0601	0.0662	0.0526	0.052	0.0578	0.0572	0.0503	0.0613	0.0735	0.0603	0.0534	0.0643	0.0573	0.0739	0.0664	0.006	513.961	0.05256	3360	3891	3786	2972	3768	3852	3854	3821	97.94	98.56	97.94	96.71	97.89
PGAL8A_00083000	1353	867	64.08	PF3D7_0719800	conserved Plasmodium protein, unknown function		0.0354	0.1576	0.2972	0.035	0.2511	0.074	0.1539	0.2183	0.1474	0.1604	0.1394	0.1345	0.213	0.2433	0.1447	0.1493	0.2785	0.1905	0.1809	0.2879	0.3025	0.1876	0.1736	0.2501	0.2647	0.2841	0.2864	0.0383	46.513	0.04804	2772	2035	1462	42	1604	1286	2106	1838	53.11	58.73	53.18	73.72	39.1
PGAL8A_00083100	7932	2775	34.98	PF3D7_0719900	conserved Plasmodium membrane protein, unknown function		0.0434	0.1864	0.425	0.0161	0.34	0.11	0.187	0.3076	0.232	0.227	0.1874	0.1884	0.3112	0.3519	0.2371	0.2341	0.387	0.2781	0.2837	0.3822	0.4222	0.2773	0.282	0.3519	0.3555	0.3987	0.4062	0.028	37.16	0.05388	2392	1594	687	518	908	567	1582	998	74.09	75.66	74.28	85.68	55.05
PGAL8A_00083200	567	498	87.83	PF3D7_0720000	exosome complex component CSL4, putative		0.0349	0.188	0.3159	0.0051	0.1629	0.0461	0.1954	0.1567	0.0983	0.0963	0.1866	0.1864	0.1627	0.1745	0.0917	0.0903	0.2978	0.2186	0.2077	0.3053	0.3247	0.2268	0.2154	0.1612	0.1576	0.1786	0.1793	0.0056	16.288	0.02812	2808	1571	1304	2320	2612	2330	1463	2615	84.61	85.94	74.57	80.76	85.75
PGAL8A_00083300	1005	486	48.36	PF3D7_0720100	small subunit rRNA processing protein, putative		0.052	0.1644	0.3163	0.0097	0.3476	0.0981	0.1642	0.3021	0.1578	0.1578	0.164	0.1681	0.2805	0.3153	0.1518	0.1496	0.3067	0.187	0.1927	0.3137	0.3234	0.1865	0.1924	0.2672	0.2682	0.306	0.3157	0.0174	19.294	0.05624	1995	1925	1299	1251	863	738	1938	1030	83.51	74.64	59.96	52.22	74.69
PGAL8A_00083400	363	267	73.55	PF3D7_0720200	conserved Plasmodium protein, unknown function		0.0617	0.1424	0.2295	0.018	0.2436	0.0674	0.1631	0.2147	0.1579	0.1584	0.1457	0.1613	0.1459	0.1988	0.1272	0.1276	0.2069	0.1544	0.1554	0.2155	0.2386	0.1688	0.1698	0.1816	0.1819	0.2126	0.2121	0.0093	19.287	0.18676	1575	2304	2053	383	1686	1499	1956	1885	73.83	84.09	65.84	56.71	82.3
PGAL8A_00083500	318	249	78.3	PF3D7_0720300	conserved Plasmodium protein, unknown function		0.0753	0.2599	0.4209	0.0199	0.3284	0.0746	0.2415	0.3222	0.2635	0.2614	0.2539	0.2455	0.3207	0.3356	0.2438	0.2416	0.3651	0.3271	0.3307	0.3804	0.4188	0.324	0.3275	0.4414	0.4269	0.4435	0.4289	0.0053	14.546	0.09746	1101	821	712	300	983	1268	973	892	14.77	23.52	9.28	5.14	21.63
PGAL8A_00083600	1911	1473	77.08	PF3D7_0720400	ferrodoxin reductase-like protein		0.0372	0.1376	0.2673	0.0016	0.2615	0.0744	0.1368	0.2331	0.1894	0.1959	0.1484	0.1476	0.2341	0.2611	0.1812	0.1891	0.2393	0.2205	0.2205	0.2391	0.2644	0.2181	0.2182	0.2723	0.2694	0.3031	0.301	0.0378	210.526	0.03384	2680	2387	1702	3361	1503	1274	2390	1666	58.65	76.56	63.49	52.45	47.39
PGAL8A_00083700	402	255	63.43	PF3D7_0720500	conserved Plasmodium protein, unknown function		0.0286	0.1625	0.2323	0.0001	0.2959	0.0379	0.1588	0.2988	0.1937	0.1818	0.1592	0.1552	0.2901	0.2876	0.1936	0.1755	0.2609	0.2173	0.1962	0.2605	0.2336	0.2127	0.1929	0.3474	0.3264	0.3276	0.305	0.0175	24.695	0.0235	3104	1960	2031	3612	1202	2708	2025	1052	51.62	65.38	71.04	64.28	93.13
PGAL8A_00083800	696	612	87.93	PF3D7_0720600	conserved Plasmodium protein, unknown function		0.0152	0.0473	0.1165	0.0107	0.0866	0.0281	0.0539	0.0747	0.0648	0.0624	0.052	0.0499	0.0779	0.0901	0.0651	0.0673	0.1111	0.0666	0.0634	0.1123	0.118	0.0688	0.0709	0.0976	0.0967	0.1059	0.1085	0.0057	242.493	0.059	3741	3865	3299	1086	3570	3203	3783	3696	77.81	64.72	89.2	85.46	83.99
PGAL8A_00083900	5271	2391	45.36	PF3D7_0720700	phosphoinositide-binding protein, putative		0.0485	0.1514	0.2878	0.0071	0.2653	0.092	0.1494	0.2423	0.2494	0.2515	0.1545	0.1534	0.2553	0.2695	0.2496	0.2484	0.2697	0.261	0.271	0.2723	0.2868	0.259	0.2685	0.3263	0.3388	0.3509	0.3515	0.0539	90.316	0.02704	2158	2151	1531	1799	1463	840	2176	1575	92.38	77.91	81.36	90.55	76.39
PGAL8A_00084000	591	483	81.73	PF3D7_0720800	Ham1-like protein, putative		0.0758	0.2399	0.3265	0.005	0.3227	0.0484	0.2419	0.3102	0.2947	0.2744	0.2647	0.2674	0.363	0.3742	0.2899	0.2931	0.3354	0.3238	0.3036	0.3366	0.3254	0.3152	0.2958	0.3537	0.3531	0.3323	0.3555	0.0423	23.792	0.04186	1087	987	1219	2341	1024	2234	969	979	60.15	84.07	83.82	88.23	91.88
PGAL8A_00084100	618	366	59.22	PF3D7_0720900	conserved Plasmodium protein, unknown function		0.039	0.1539	0.3074	0.0063	0.2333	0.054	0.1656	0.213	0.1573	0.1832	0.1801	0.1843	0.1994	0.2251	0.1438	0.1698	0.2856	0.2284	0.2368	0.2822	0.3047	0.232	0.2407	0.1928	0.2027	0.2226	0.2292	0.0212	41.318	0.05792	2591	2105	1362	1967	1806	1991	1917	1904	46.44	59.53	64.72	59.6	58.33
PGAL8A_00084200	8178	2697	32.98	PF3D7_0721000	conserved Plasmodium membrane protein, unknown function		0.1089	0.3542	0.7223	0.0224	0.6661	0.2001	0.3486	0.5943	0.3911	0.3969	0.3681	0.3655	0.5885	0.6674	0.3668	0.3688	0.6649	0.4977	0.49	0.6662	0.7236	0.4995	0.4886	0.7114	0.7114	0.7332	0.7382	0.0521	22.158	0.10322	417	355	126	196	116	45	367	139	59.81	69.21	59.94	63.04	52.4
PGAL8A_00084300	702	468	66.67	PF3D7_0721100	conserved Plasmodium protein, unknown function		0.0511	0.1368	0.1623	0.0102	0.1493	0.0545	0.1403	0.1335	0.133	0.1308	0.1337	0.1322	0.1356	0.161	0.1404	0.1376	0.144	0.168	0.1647	0.1408	0.1637	0.1697	0.1665	0.158	0.1468	0.1781	0.1678	0.0229	1414.82	0.03516	2038	2394	2766	1159	2768	1975	2339	2921	62.07	86.33	91.4	84.3	81.25
PGAL8A_00084400	2739	921	33.63	PF3D7_0721200	conserved Plasmodium protein, unknown function		0.0713	0.2782	0.5601	0.0216	0.4557	0.1602	0.2784	0.4231	0.3132	0.3192	0.2894	0.293	0.4238	0.4545	0.3342	0.3436	0.5476	0.3769	0.4076	0.5522	0.5604	0.3681	0.4064	0.5175	0.5209	0.565	0.6037	0.0485	11.264	0.09082	1214	693	311	223	418	131	693	448	47.65	38.84	28.7	46.81	46.86
PGAL8A_00084500	2376	1257	52.9	PF3D7_0721300	ATP-dependent RNA helicase DBP7, putative		0.0227	0.0878	0.2458	0.0047	0.2152	0.0611	0.0939	0.1805	0.123	0.1261	0.0955	0.1017	0.1763	0.2207	0.1239	0.1273	0.2208	0.1562	0.1735	0.2234	0.2459	0.163	0.1779	0.197	0.2087	0.2397	0.2496	0.0308	45.547	0.01766	3378	3233	1896	2441	1989	1711	3132	2299	81.01	83.8	44.61	36.84	44.73
PGAL8A_00084600	663	510	76.92	PF3D7_0721400	conserved Plasmodium protein, unknown function		0.0713	0.1331	0.1957	0.0045	0.2237	0.0764	0.135	0.2102	0.1826	0.1835	0.1221	0.1246	0.2068	0.2013	0.1799	0.1806	0.2216	0.2002	0.2035	0.2219	0.1961	0.197	0.2042	0.2271	0.2251	0.2319	0.2225	0.0194	18.272	0.02588	1214	2444	2390	2491	1901	1220	2416	1935	66.52	70.05	87.24	83.17	88.61
PGAL8A_00084800	585	573	97.95	PF3D7_0721600	40S ribosomal protein S5, putative		0.0041	0.0105	0.0094	0.0001	0.0123	0.0023	0.0105	0.0148	0.0062	0.0062	0.0105	0.0105	0.0123	0.0117	0.0021	0.0021	0.0127	0.0126	0.0125	0.013	0.011	0.0126	0.0125	0.0119	0.0094	0.0093	0.0093	0.0002	389.975	0.00284	4162	4232	4251	3612	4247	4204	4232	4224	99.34	99.12	98.37	95.67	97.82
PGAL8A_00084900	1392	1125	80.82	PF3D7_0721700	secreted ookinete protein, putative		0.3056	0.2784	0.321	0.0032	0.3746	0.1123	0.2767	0.3683	0.2951	0.2906	0.3453	0.3436	0.4229	0.4234	0.3858	0.3831	0.2932	0.2466	0.2515	0.2981	0.3236	0.2519	0.2549	0.3311	0.3288	0.3538	0.3506	0.0231	144.111	0.10522	17	692	1264	2874	724	535	703	640	50.11	25.83	22.24	5.14	71.72
PGAL8A_00085000	324	147	45.37	PF3D7_0721800	conserved Plasmodium protein, unknown function		0.0161	0.0895	0.1273	0	0.1054	0.0464	0.0895	0.1345	0.0899	0.1246	0.0904	0.0904	0.1436	0.1049	0.0728	0.1133	0.1644	0.1456	0.1917	0.1644	0.1273	0.1457	0.1917	0.1771	0.2073	0.1462	0.2026	0.0398	122.61	0.03014	3692	3200	3157	3943	3344	2318	3206	2905	91.4	94.96	96.85	97.78	97.63
PGAL8A_00085100	234	156	66.67	PF3D7_0721900	V-type ATPase V0 subunit e, putative		0.0364	0.1825	0.113	0.0001	0.1854	0.0089	0.184	0.1847	0.1	0.1009	0.1553	0.1563	0.1811	0.1845	0.1225	0.1216	0.1105	0.1622	0.1665	0.1104	0.113	0.1632	0.1676	0.1732	0.1744	0.1753	0.1738	0.0003	44.509	0.01384	2727	1656	3342	3612	2334	4003	1621	2247	88.49	73.61	67.42	43.98	89.63
PGAL8A_00085200	522	195	37.36	PF3D7_0722000	conserved Plasmodium protein, unknown function		0.0775	0.1162	0.2724	0.0058	0.3336	0.0511	0.1248	0.3013	0.2277	0.2401	0.1259	0.1365	0.2924	0.3073	0.1783	0.2178	0.2484	0.2149	0.2167	0.2613	0.2854	0.2147	0.2195	0.2965	0.2997	0.3182	0.32	0.033	16.908	0.03252	1032	2736	1645	2098	946	2103	2585	1038	63.18	61.12	40.07	51.5	56.21
PGAL8A_00085400	1044	972	93.1	PF3D7_0816800	meiotic recombination protein DMC1, putative		0.0062	0.0259	0.0463	0.0052	0.0498	0.0159	0.0299	0.0549	0.0449	0.0448	0.031	0.0352	0.0567	0.0519	0.0443	0.0444	0.0535	0.0491	0.0464	0.0548	0.0472	0.0521	0.0493	0.0594	0.0556	0.054	0.0503	0.0026	30.177	0.02672	4090	4094	3992	2292	3946	3738	4061	3894	49.87	55.22	37.25	46.51	92.76
PGAL8A_00085500	432	318	73.61	PF3D7_0816700	trafficking protein particle complex subunit 2-like protein, putative	TCA17	0.0113	0.0958	0.1769	0.0041	0.1839	0.0616	0.0911	0.1481	0.1279	0.1367	0.0864	0.0815	0.1448	0.1832	0.1331	0.143	0.158	0.145	0.157	0.1535	0.1717	0.1398	0.1512	0.1695	0.1833	0.1801	0.189	0.0169	64.534	0.05116	3907	3096	2606	2624	2354	1692	3179	2712	44.31	51.53	62.21	33.38	80.22
PGAL8A_00085600	3096	2583	83.43	PF3D7_0816600	chaperone protein ClpB1		0.007	0.0236	0.0568	0.0013	0.0507	0.0206	0.024	0.0425	0.0368	0.036	0.0247	0.0252	0.0406	0.0472	0.0376	0.0367	0.0534	0.0363	0.0364	0.0526	0.0554	0.0365	0.0375	0.0547	0.0549	0.0636	0.0639	0.0032	131.44	0.00794	4061	4116	3909	3426	3937	3544	4115	4016	57.02	82.31	79.82	61.9	19.35
PGAL8A_00085700	516	474	91.86	PF3D7_0816500	small heat shock protein HSP20, putative		0.0228	0.0846	0.094	0	0.1071	0.0053	0.0849	0.1062	0.0901	0.0925	0.0868	0.087	0.1003	0.1015	0.0973	0.0965	0.0925	0.0926	0.0952	0.0927	0.094	0.093	0.0956	0.0738	0.0769	0.0755	0.0783	0.0026	21.922	0.01502	3374	3301	3565	3943	3316	4120	3299	3292	36.04	12.72	10.54	18.05	88.11
PGAL8A_00085800	693	624	90.04	PF3D7_0816400	EF-hand calcium-binding domain-containing protein, putative		0.0341	0.0929	0.1849	0.0041	0.1629	0.0493	0.0895	0.1389	0.1764	0.1623	0.0963	0.0926	0.1409	0.1553	0.1686	0.1545	0.1664	0.1761	0.1647	0.1661	0.1851	0.182	0.1703	0.2185	0.2166	0.2394	0.2353	0.0236	30.047	0.04804	2850	3152	2512	2624	2612	2189	3206	2847	33.04	5.49	51.9	66.21	80.84
PGAL8A_00085900	3531	699	19.8	PF3D7_0816300	conserved Plasmodium protein, unknown function		0.0783	0.2191	0.445	0.0137	0.4033	0.1414	0.2026	0.3892	0.2673	0.2887	0.2196	0.2035	0.4111	0.4283	0.2641	0.2983	0.408	0.2789	0.3132	0.407	0.4443	0.2902	0.3209	0.4552	0.4379	0.4869	0.4801	0.0796	9.662	0.09898	1000	1199	608	726	597	223	1378	554	12.5	18.9	7.44	12.17	9.71
PGAL8A_00086000	630	534	84.76	PF3D7_0816200	vacuolar protein sorting-associated protein 2, putative		0.0204	0.1035	0.2624	0.0023	0.2383	0.0794	0.1059	0.2241	0.0957	0.1063	0.1125	0.115	0.2158	0.23	0.0963	0.1066	0.251	0.1125	0.1231	0.2539	0.2598	0.1148	0.1253	0.179	0.1817	0.1897	0.1925	0.0089	6.618	0.02274	3503	2947	1756	3154	1757	1137	2906	1768	42.03	17.09	59.82	68.19	74.74
PGAL8A_00086100	549	468	85.25	PF3D7_0816100	phosphopantothenoylcysteine decarboxylase, putative		0.053	0.1256	0.2741	0.0084	0.2514	0.0646	0.1234	0.2311	0.1459	0.1434	0.1023	0.1002	0.2347	0.2547	0.1417	0.1425	0.2428	0.1717	0.1643	0.2456	0.2692	0.1722	0.1653	0.2417	0.2326	0.2823	0.268	0.0316	21.021	0.19218	1965	2572	1634	1519	1599	1585	2615	1687	62.71	52.81	63.16	81.98	65.01
PGAL8A_00086200	1320	891	67.5	PF3D7_0816000	ribosome assembly protein RRB1, putative		0.0496	0.1272	0.2267	0.0078	0.263	0.0871	0.1285	0.2349	0.2164	0.226	0.1281	0.1311	0.2376	0.2644	0.2265	0.2268	0.2099	0.2455	0.2392	0.2056	0.2255	0.2452	0.2391	0.286	0.287	0.337	0.3308	0.0163	13.772	0.03714	2117	2539	2086	1638	1479	960	2523	1651	86.9	81.05	54.75	51.5	51.98
PGAL8A_00086300	1950	1515	77.69	PF3D7_0815900	dihydrolipoyl dehydrogenase, apicoplast	PfLipDHa	0.0442	0.0969	0.2478	0.0047	0.2524	0.0877	0.0962	0.2391	0.1851	0.1847	0.0912	0.0906	0.2339	0.248	0.1902	0.1922	0.24	0.2081	0.1991	0.2442	0.2526	0.2116	0.2025	0.281	0.2702	0.2918	0.287	0.0296	96.523	0.05632	2365	3074	1878	2441	1591	943	3086	1609	40.18	16.43	24.44	21.98	23.9
PGAL8A_00086400	4434	1317	29.7	PF3D7_0815800	vacuolar protein sorting-associated protein 9, putative		0.043	0.1928	0.3835	0.0111	0.3918	0.1518	0.1953	0.3684	0.2629	0.2676	0.188	0.1889	0.3578	0.3853	0.2577	0.2595	0.3446	0.277	0.2811	0.3487	0.3888	0.2796	0.2818	0.3704	0.3701	0.4164	0.41	0.0419	80.022	0.0621	2416	1506	891	1026	644	167	1466	639	52.81	67.84	80.94	90.46	62.23
PGAL8A_00086500	1044	315	30.17	PF3D7_0815700	ubiquitin	PfsUb	0.0626	0.172	0.3183	0.0118	0.347	0.1026	0.1777	0.3053	0.2075	0.2511	0.1371	0.1425	0.2591	0.2932	0.1496	0.1845	0.3129	0.2064	0.2397	0.3217	0.3425	0.2126	0.2462	0.3388	0.3601	0.3343	0.3543	0.048	13.405	0.06924	1536	1815	1278	926	868	681	1718	1012	32.09	26	31.42	37.61	50.94
PGAL8A_00086600	807	543	67.29	PF3D7_0815600	eukaryotic translation initiation factor 3 subunit G, putative		0.009	0.0314	0.0712	0.0001	0.0753	0.0114	0.0314	0.0866	0.0646	0.0644	0.0343	0.0344	0.0906	0.0791	0.0709	0.0713	0.0789	0.0725	0.0716	0.0789	0.0714	0.0725	0.0718	0.0513	0.0513	0.0435	0.0436	0.0001	152.582	0.0087	3986	4051	3779	3612	3703	3912	4051	3536	97.06	96.23	94.65	93.92	91.19
PGAL8A_00086700	1581	810	51.23	PF3D7_0815500	conserved Plasmodium protein, unknown function		0.0575	0.1662	0.2967	0.0043	0.253	0.0992	0.1644	0.2409	0.1757	0.1609	0.1733	0.172	0.2615	0.3012	0.1726	0.1606	0.2925	0.198	0.1859	0.2887	0.2941	0.194	0.1831	0.2355	0.2341	0.2513	0.2391	0.01	178.898	0.05248	1751	1889	1464	2565	1586	725	1934	1593	55.44	28.02	74.59	79.56	23.75
PGAL8A_00086800	453	351	77.48	PF3D7_0815400	conserved Apicomplexan protein, unknown function		0.0172	0.0651	0.101	0.0069	0.1077	0.0443	0.0662	0.1007	0.0719	0.0593	0.0735	0.0748	0.096	0.1019	0.0685	0.0659	0.1088	0.0799	0.0744	0.1109	0.1102	0.0809	0.0753	0.0869	0.0808	0.087	0.0818	0.0175	37.231	0.0282	3646	3621	3483	1843	3307	2404	3610	3359	29.37	30.66	63.05	48.73	88.49
PGAL8A_00086900	891	651	73.06	PF3D7_0413500	phosphoglucomutase-2	PfPGM2	0.0387	0.0697	0.1274	0.0035	0.153	0.0663	0.0694	0.1257	0.1061	0.1064	0.0602	0.06	0.1144	0.1377	0.0914	0.0924	0.1074	0.0818	0.0831	0.1071	0.1274	0.0823	0.0835	0.0898	0.0911	0.109	0.1104	0.0036	269.782	0.0324	2601	3551	3154	2791	2733	1535	3556	3032	41.58	20.56	85.08	85.7	65.99
PGAL8A_00087000	1179	1086	92.11	PF3D7_0413600	26S protease regulatory subunit 6B, putative // 26S proteasome AAA-ATPase subunit RPT3, putative		0.0032	0.0155	0.0191	0.0011	0.0212	0.006	0.0143	0.019	0.0166	0.0152	0.0121	0.011	0.0164	0.0182	0.0142	0.013	0.0178	0.0154	0.0143	0.0191	0.0204	0.0165	0.0154	0.0071	0.0072	0.0103	0.0087	0.0011	137.76	0.0052	4181	4194	4190	3476	4179	4089	4205	4203	85.15	86.74	94.62	94.95	80.08
PGAL8A_00087100	1005	780	77.61	PF3D7_0413700	lysine decarboxylase-like protein, putative		0.0363	0.0972	0.0799	0.003	0.1173	0.045	0.0981	0.1068	0.2017	0.2071	0.0898	0.0902	0.1108	0.1226	0.2066	0.2119	0.0758	0.1889	0.1916	0.0754	0.0804	0.1913	0.1941	0.1717	0.1745	0.1876	0.1914	0.0167	18.222	0.05344	2730	3069	3719	2943	3193	2377	3061	3285	37.51	51.26	80.08	76.44	50.81
PGAL8A_00087200	822	498	60.58	PF3D7_0413800	50S ribosomal protein L10, putative		0.0229	0.0325	0.1315	0	0.1604	0.0391	0.0325	0.1329	0.0885	0.0852	0.0404	0.0404	0.1288	0.1442	0.1027	0.0993	0.1125	0.0913	0.088	0.1124	0.1315	0.0914	0.0881	0.1516	0.1473	0.1776	0.1728	0.0024	50.902	0.0259	3367	4039	3106	3943	2645	2646	4038	2931	11.87	12.99	42.48	51.55	65.83
PGAL8A_00087300	2544	1554	61.08	PF3D7_0413900	ubiquitin carboxyl-terminal hydrolase 13, putative		0.0316	0.07	0.143	0.0023	0.1355	0.0469	0.0715	0.1306	0.1049	0.1025	0.0695	0.0709	0.1232	0.1299	0.1084	0.1093	0.1352	0.1091	0.108	0.137	0.1446	0.1097	0.1086	0.1481	0.1482	0.1533	0.1558	0.0092	57.115	0.0294	2961	3540	2987	3154	2946	2294	3515	2963	74.74	64.06	69.92	68.92	51.96
PGAL8A_00087400	3582	2748	76.72	PF3D7_0414000	structural maintenance of chromosomes protein 3, putative		0.0318	0.0686	0.0905	0.0017	0.0941	0.0178	0.07	0.0837	0.0882	0.0893	0.0679	0.0686	0.0792	0.0845	0.0772	0.0783	0.0818	0.0855	0.0884	0.0824	0.0902	0.0854	0.0883	0.096	0.0973	0.1013	0.1025	0.0088	124.986	0.03104	2952	3564	3605	3337	3473	3645	3543	3577	17.74	55.34	61.57	53.38	53.33
PGAL8A_00087500	4332	2541	58.66	PF3D7_0414100	conserved Plasmodium membrane protein, unknown function		0.1009	0.2411	0.2935	0.0058	0.2987	0.0479	0.2359	0.3011	0.307	0.3048	0.2181	0.2158	0.2723	0.2763	0.283	0.2854	0.287	0.3077	0.3097	0.2897	0.2983	0.3099	0.3131	0.3352	0.3354	0.3419	0.3418	0.0184	10.361	0.1957	509	978	1491	2098	1189	2259	1020	1041	4.41	41.82	20.22	20.88	15.19
PGAL8A_00087700	333	213	63.96	PF3D7_0414300	Rab5-interacting protein, putative		0.0391	0.1435	0.2885	0.0068	0.1905	0.0061	0.1347	0.1913	0.2039	0.1816	0.1543	0.1448	0.1805	0.2033	0.1718	0.1707	0.2839	0.2443	0.2417	0.2707	0.2749	0.245	0.2424	0.1485	0.145	0.1607	0.1551	0.0122	15.568	0.08908	2583	2281	1527	1864	2276	4086	2418	2156	69.5	72.6	67.39	53.36	68.99
PGAL8A_00087800	1041	291	27.95	PF3D7_0414400	conserved Plasmodium protein, unknown function		0.1377	0.3735	0.8982	0.018	0.7857	0.0591	0.4102	0.8005	0.5082	0.5485	0.404	0.4706	0.6617	0.6032	0.5146	0.5168	0.9441	0.6679	0.6264	1.0086	10.3192	0.7156	0.6654	0.8362	0.9422	0.8337	0.9278	0.0707	6.468	0.35256	186	294	44	383	58	1795	213	33	3.74	19.01	5.48	5.14	7.34
PGAL8A_00087900	1083	642	59.28	PF3D7_0414500	RNA-binding protein, putative		0.0168	0.0699	0.1383	0.0021	0.1038	0.0256	0.0676	0.1124	0.0744	0.0752	0.0802	0.0781	0.1288	0.1173	0.0775	0.0776	0.1412	0.0943	0.0924	0.144	0.1413	0.0922	0.0901	0.1035	0.1058	0.0914	0.0936	0.0077	50.286	0.05276	3665	3541	3037	3213	3358	3316	3587	3231	45.49	28.77	22.85	41.25	84.79
PGAL8A_00088000	717	429	59.83	PF3D7_0414600	acylated pleckstrin-homology domain-containing protein, putative		0.0169	0.0493	0.0349	0.0001	0.0571	0.0031	0.0495	0.0519	0.0773	0.0732	0.0416	0.0417	0.0422	0.047	0.0662	0.0625	0.0308	0.0566	0.0599	0.0308	0.035	0.0568	0.0601	0.0718	0.0675	0.0776	0.0736	0.0029	23.336	0.01382	3657	3847	4078	3612	3876	4184	3838	3929	25.12	38.62	83.37	87.93	75.84
PGAL8A_00088100	1788	1215	67.95	PF3D7_0414700	GTP-binding protein, putative		0.0417	0.0959	0.1663	0.0029	0.153	0.0283	0.096	0.142	0.1037	0.1094	0.0929	0.092	0.1414	0.156	0.0964	0.0995	0.1483	0.107	0.1122	0.1462	0.1641	0.1063	0.1115	0.1467	0.1504	0.1516	0.1528	0.014	25.865	0.04098	2473	3093	2723	2972	2733	3195	3089	2809	29.55	47.2	57.57	67.86	32.47
PGAL8A_00088200	1035	153	14.78	PF3D7_0414800	conserved Plasmodium protein, unknown function		0.0713	0.1922	0.2808	0.0189	0.2133	0.057	0.2037	0.2529	0.294	0.2598	0.1719	0.1831	0.2502	0.2318	0.2904	0.2572	0.2911	0.239	0.1975	0.3081	0.2984	0.2512	0.2093	0.3052	0.2922	0.3201	0.3184	0.0242	1.079	0.25864	1214	1511	1578	340	2016	1870	1364	1468	3.72	11.03	28.09	62.55	5.11
PGAL8A_00088300	828	822	99.28	PF3D7_0414900	armadillo-domain containing rhoptry protein // armadillo repeats-only protein	PfARO	0.0092	0.0227	0.0305	0.0029	0.0349	0.0088	0.0243	0.0306	0.0412	0.0426	0.0245	0.0262	0.0309	0.0355	0.0385	0.0434	0.0264	0.0308	0.0359	0.0283	0.0324	0.0325	0.0375	0.0393	0.0445	0.0402	0.0455	0.0047	88.593	0.09048	3975	4127	4122	2972	4085	4007	4114	4114	65.88	39.47	91.47	97.49	62.94
PGAL8A_00088400	1131	957	84.62	PF3D7_0415000	arsenical pump-driving ATPase, putative		0.0133	0.0699	0.0727	0.0001	0.0728	0.016	0.07	0.0691	0.0768	0.0839	0.0638	0.0639	0.0621	0.0606	0.0705	0.0798	0.0696	0.0731	0.0771	0.0697	0.0727	0.0733	0.0771	0.0636	0.066	0.0747	0.0801	0.0126	133.66	0.00912	3824	3541	3766	3612	3733	3730	3543	3756	84.49	64.17	70.69	51.94	68.25
PGAL8A_00088500	1026	708	69.01	PF3D7_0415100	conserved protein, unknown function		0.0598	0.1773	0.3463	0.0101	0.3479	0.0774	0.1837	0.2892	0.2724	0.2855	0.1693	0.1799	0.305	0.344	0.2797	0.2745	0.3005	0.3484	0.3157	0.3146	0.354	0.3514	0.3092	0.3932	0.3874	0.4747	0.455	0.0611	11.018	0.0703	1666	1735	1098	1178	859	1191	1625	1114	76.98	41.08	31.47	19.92	49.87
PGAL8A_00088600	4374	1587	36.28	PF3D7_0415200	conserved Plasmodium protein, unknown function		0.0679	0.2345	0.4249	0.0125	0.3877	0.0987	0.2356	0.341	0.3433	0.3517	0.2073	0.2082	0.3257	0.3675	0.3335	0.3369	0.3876	0.3744	0.3743	0.3808	0.416	0.374	0.3691	0.4712	0.4643	0.5168	0.5052	0.057	17.021	0.06528	1319	1041	688	851	666	733	1022	778	33.74	37.16	47.15	48.95	14.83
PGAL8A_00088700	4308	1440	33.43	PF3D7_0415300	cdc2-related protein kinase 3	PfCRK3	0.0519	0.1784	0.3349	0.0106	0.3003	0.1254	0.1726	0.2826	0.2339	0.2406	0.1818	0.1774	0.2968	0.3013	0.2436	0.259	0.3204	0.2877	0.282	0.3147	0.3278	0.2828	0.2794	0.3619	0.3516	0.3823	0.3724	0.0438	64.582	0.06408	2002	1717	1169	1103	1173	367	1813	1171	85.53	88.3	71.78	59.67	61.29
PGAL8A_00088800	627	537	85.65	PF3D7_0415400	coatomer subunit zeta, putative		0.0376	0.0872	0.1843	0.0045	0.1328	0.0672	0.0868	0.1438	0.2101	0.1911	0.0973	0.0968	0.1457	0.1342	0.2234	0.2068	0.1932	0.2126	0.2041	0.1913	0.1824	0.206	0.1977	0.2678	0.2676	0.2924	0.2723	0.072	22.934	0.02858	2660	3248	2518	2491	2991	1510	3253	2788	79.09	72.39	78.1	82.55	90.22
PGAL8A_00088900	687	447	65.07	PF3D7_0415500	nuclear cap-binding protein subunit 2, putative		0.044	0.0827	0.0736	0.0001	0.0815	0.0109	0.0823	0.0868	0.0696	0.072	0.0583	0.0581	0.0686	0.0623	0.0594	0.0565	0.0713	0.0701	0.0663	0.0712	0.0735	0.0698	0.0661	0.0667	0.0665	0.0597	0.0596	0.0081	77.497	0.01038	2372	3334	3762	3612	3633	3931	3338	3533	83.82	82.97	74.71	73.22	83.73
PGAL8A_00089000	669	612	91.48	PF3D7_0415600	GTP:AMP phosphotransferase	PfGAK	0.0379	0.1441	0.2826	0.002	0.258	0.1081	0.1417	0.2211	0.15	0.1582	0.1386	0.137	0.214	0.2636	0.1592	0.1617	0.252	0.1991	0.1974	0.2489	0.2793	0.1968	0.1962	0.2443	0.2376	0.2825	0.2898	0.0329	64.166	0.0515	2642	2267	1567	3240	1537	597	2312	1808	31.12	31.24	17.66	16.05	53.44
PGAL8A_00089100	1233	786	63.75	PF3D7_0415700	conserved Plasmodium protein, unknown function		0.0657	0.2256	0.3295	0.0033	0.2865	0.0667	0.23	0.2586	0.2	0.1813	0.2481	0.2527	0.2735	0.2886	0.2155	0.1965	0.313	0.2758	0.2633	0.3172	0.3318	0.2759	0.2683	0.2574	0.2596	0.2773	0.2804	0.0264	11.784	0.10308	1416	1130	1203	2843	1273	1522	1079	1405	11.03	24.56	41.89	52.19	13.61
PGAL8A_00089300	618	510	82.52	PF3D7_0415900	60S ribosomal protein L15, putative		0.0023	0.0213	0.0101	0	0.0251	0.0026	0.0213	0.0216	0.0234	0.0246	0.0188	0.0189	0.0187	0.0221	0.0268	0.0271	0.0073	0.021	0.0213	0.0073	0.0101	0.0211	0.0213	0.0162	0.0164	0.0197	0.0199	0.0007	335.114	0.00306	4206	4144	4246	3943	4156	4197	4144	4183	99.53	99.36	98.42	97.37	98.67
PGAL8A_00089400	1416	519	36.65	PF3D7_0416000	RNA-binding protein, putative		0.0168	0.3098	0.3981	0.0097	0.2276	0.0456	0.3043	0.2233	0.2507	0.2576	0.3136	0.3078	0.2211	0.2263	0.2472	0.2537	0.4059	0.4132	0.4019	0.4076	0.3993	0.4084	0.4036	0.2731	0.2789	0.2695	0.2679	0.0756	56.049	0.08004	3665	514	809	1251	1858	2350	539	1779	78.55	87.43	92.14	96.66	92.47
PGAL8A_00089600	1926	1161	60.28	PF3D7_0416100	glutamyl-tRNA(Gln) amidotransferase subunit A		0.0543	0.2192	0.3546	0.0166	0.2863	0.1102	0.2086	0.2479	0.1583	0.1552	0.2248	0.215	0.2465	0.2768	0.162	0.1592	0.3323	0.2695	0.2601	0.328	0.3483	0.2582	0.2506	0.2478	0.2423	0.2879	0.2833	0.0128	9.517	0.08294	1903	1197	1053	479	1275	565	1309	1521	47.26	71.16	82.07	87.61	52.8
PGAL8A_00089700	621	180	28.99	PF3D7_0416200	conserved protein, unknown function		0.0335	0.1082	0.1513	0.0138	0.1557	0.0734	0.1176	0.1265	0.0928	0.0959	0.1078	0.1175	0.1199	0.1387	0.0979	0.0858	0.1249	0.1231	0.1255	0.1321	0.143	0.1315	0.134	0.1505	0.1626	0.1652	0.1761	0.0069	42.486	0.03912	2869	2857	2885	718	2705	1314	2712	3020	79.9	80.16	71.54	70.1	75.04
PGAL8A_00089800	3315	2022	61	PF3D7_0416300	DNA helicase MCM9, putative		0.0453	0.127	0.1352	0.0053	0.1317	0.0638	0.1241	0.1499	0.1558	0.1542	0.1261	0.1234	0.1454	0.124	0.152	0.1507	0.1533	0.1575	0.1592	0.15	0.134	0.1534	0.1562	0.173	0.175	0.162	0.163	0.0148	9.017	0.05174	2308	2543	3069	2261	3004	1616	2601	2691	32.91	49.61	61.74	60.6	21.12
PGAL8A_00089900	3096	1551	50.1	PF3D7_0416400	histone acetyltransferase, putative		0.0372	0.1469	0.1821	0.0048	0.1458	0.0517	0.1468	0.1471	0.1592	0.1499	0.1502	0.1512	0.1588	0.1496	0.1544	0.1494	0.1791	0.2214	0.2075	0.1808	0.1833	0.2222	0.2083	0.188	0.1876	0.1852	0.1806	0.0334	86.351	0.04368	2680	2217	2546	2414	2807	2087	2221	2725	64.03	81.93	90.46	89.08	67.66
PGAL8A_00090000	657	420	63.93	PF3D7_0416500	repressor of RNA polymerase III transcription MAF1		0.0169	0.0193	0.0583	0	0.0455	0.0028	0.0194	0.0384	0.0634	0.0725	0.0214	0.0198	0.0433	0.0488	0.0661	0.0749	0.0498	0.0684	0.07	0.05	0.0586	0.0688	0.0705	0.0832	0.0939	0.0814	0.0918	0.0083	9.004	0.0051	3657	4163	3889	3943	3986	4190	4162	4051	20.91	20.75	60.55	73.84	75.7
PGAL8A_00090100	885	480	54.24	PF3D7_0416600	prohibitin-like protein, putative		0.0909	0.1787	0.218	0.0052	0.2557	0.0387	0.173	0.2493	0.3022	0.263	0.1918	0.1859	0.2609	0.2776	0.2974	0.2675	0.219	0.2946	0.2639	0.2137	0.2128	0.2885	0.2598	0.2673	0.2363	0.2962	0.2495	0.0787	39.83	0.0729	690	1712	2173	2292	1558	2670	1809	1502	31.08	19.27	48.12	45.7	69.02
PGAL8A_00090300	579	525	90.67	PF3D7_0416800	small GTP-binding protein sar1		0.009	0.0298	0.0082	0	0.0283	0.0027	0.0298	0.0302	0.0316	0.0289	0.0246	0.0246	0.0243	0.0225	0.0261	0.0234	0.0105	0.0236	0.0208	0.0106	0.0083	0.0236	0.0208	0.0292	0.0262	0.0274	0.0243	0.0023	121.516	0.00432	3986	4061	4256	3943	4133	4194	4062	4118	94.95	95.98	97.39	98.08	95.29
PGAL8A_00090400	6588	2616	39.71	PF3D7_0416900	conserved Plasmodium protein, unknown function		0.0754	0.2006	0.4105	0.0106	0.3806	0.116	0.1974	0.3417	0.282	0.2758	0.2165	0.2108	0.3409	0.3866	0.2955	0.2957	0.3685	0.3602	0.35	0.3685	0.4136	0.355	0.3427	0.4364	0.4348	0.4822	0.4635	0.0575	24.73	0.055	1099	1400	756	1103	698	480	1447	773	65.5	71.2	37.13	42.46	25.95
PGAL8A_00090500	1800	333	18.5	PF3D7_0417000	conserved Plasmodium protein, unknown function		0.1981	0.5993	0.7325	0.0245	0.6801	0.1432	0.5958	0.6284	0.5598	0.5198	0.5354	0.5052	0.5803	0.6873	0.5182	0.4809	0.6454	0.6349	0.6451	0.6542	0.7577	0.637	0.6465	0.6533	0.6378	0.6565	0.6141	0.0784	25.981	0.67156	59	47	116	154	104	206	45	109	31.47	34.65	14.94	15.11	80.8
PGAL8A_00090600	1302	885	67.97	PF3D7_0417100	mRNA-binding protein PUF2	PfPuf2	0.0171	0.073	0.1227	0.0013	0.1373	0.059	0.0717	0.1433	0.0771	0.083	0.0804	0.0793	0.1491	0.1496	0.084	0.0899	0.1294	0.0822	0.0795	0.1302	0.1234	0.0817	0.0792	0.1178	0.1203	0.1166	0.1193	0.0092	2.06	0.03214	3651	3483	3210	3426	2925	1802	3511	2796	8.17	4.92	3.67	5.14	32.04
PGAL8A_00090700	1770	1359	76.78	PF3D7_0417200	bifunctional dihydrofolate reductase-thymidylate synthase	PfDHFR-TS	0.0493	0.0715	0.0971	0.0026	0.1069	0.0271	0.0714	0.0999	0.0908	0.0914	0.0854	0.085	0.1114	0.1103	0.1076	0.1118	0.0977	0.0811	0.0837	0.0983	0.0976	0.0799	0.0826	0.1013	0.1006	0.1108	0.1091	0.021	72.567	0.05448	2132	3511	3532	3074	3319	3252	3517	3370	34.64	45.94	79.89	71.63	57.01
PGAL8A_00090800	2190	1101	50.27	PF3D7_0417300	LETM1-like protein, putative		0.0291	0.0832	0.119	0.0076	0.0986	0.0208	0.0803	0.0938	0.1179	0.1188	0.0936	0.0914	0.1041	0.1057	0.1261	0.1261	0.1202	0.1322	0.142	0.1248	0.1236	0.1316	0.1413	0.1332	0.1356	0.14	0.1438	0.0302	56.207	0.03008	3087	3324	3258	1690	3421	3532	3365	3453	78.81	83.88	70.02	58.28	60.65
PGAL8A_00090900	14505	4425	30.51	PF3D7_0417400	conserved Plasmodium protein, unknown function		0.1009	0.339	0.6769	0.0263	0.6284	0.1474	0.3409	0.5355	0.4664	0.4825	0.3435	0.3422	0.5092	0.5963	0.4661	0.4755	0.6133	0.5111	0.5204	0.604	0.6669	0.504	0.509	0.6575	0.6713	0.7082	0.7196	0.0888	32.55	0.0939	509	398	160	118	149	181	391	209	82.76	85.1	58.27	62.82	52.21
PGAL8A_00091100	2928	669	22.85	PF3D7_0417600	conserved Plasmodium protein, unknown function		0.0487	0.2245	0.282	0.0077	0.1658	0.0563	0.228	0.1605	0.174	0.166	0.2068	0.2116	0.1627	0.1852	0.1664	0.1659	0.2641	0.2458	0.2454	0.2736	0.2917	0.2544	0.254	0.2335	0.2446	0.2436	0.2576	0.027	5.26	0.0502	2148	1141	1569	1669	2577	1901	1102	2570	17.14	6.55	26.28	22.94	31.97
PGAL8A_00091200	1584	438	27.65	PF3D7_0417700	conserved Plasmodium protein, unknown function		0.0663	0.2418	0.3491	0.015	0.2965	0.0821	0.2362	0.271	0.2569	0.2622	0.2158	0.2032	0.2679	0.302	0.2212	0.2112	0.3363	0.2794	0.274	0.3293	0.3573	0.2618	0.2567	0.2799	0.2911	0.3391	0.3433	0.0235	2.528	0.21122	1393	966	1085	607	1200	1063	1019	1288	10.25	6.42	29.1	32.09	56.71
PGAL8A_00091300	2532	1029	40.64	PF3D7_0417800	cdc2-related protein kinase 1	Pfcrk-1	0.0214	0.1118	0.1404	0.0023	0.1257	0.0275	0.109	0.1289	0.1109	0.1067	0.1131	0.1136	0.1397	0.1346	0.1177	0.1116	0.1424	0.1167	0.1174	0.1444	0.139	0.1185	0.1191	0.1316	0.1305	0.1449	0.14	0.0133	34.424	0.04734	3441	2807	3010	3154	3085	3232	2849	2989	46.86	62.4	71.68	58.33	65.97
PGAL8A_00091400	2271	801	35.27	PF3D7_0417900	conserved Plasmodium protein, unknown function		0.0583	0.1844	0.3418	0.006	0.2484	0.0779	0.1818	0.2086	0.198	0.2102	0.1639	0.1623	0.218	0.2543	0.2039	0.2177	0.2719	0.2638	0.2615	0.2749	0.3465	0.2608	0.2584	0.2315	0.2372	0.2867	0.2895	0.019	13.024	0.04158	1713	1623	1121	2051	1633	1179	1668	1960	23.93	25.88	10.7	15.54	36.2
PGAL8A_00091500	12660	5829	46.04	PF3D7_0418000	conserved Plasmodium protein, unknown function		0.0962	0.3363	0.5495	0.0169	0.4554	0.1144	0.3384	0.3997	0.3306	0.3243	0.3298	0.3329	0.3989	0.4617	0.3178	0.3132	0.5212	0.4337	0.4376	0.5195	0.5491	0.4396	0.4431	0.4583	0.4523	0.4986	0.4993	0.0358	23.065	0.11874	583	412	327	453	421	506	402	515	25.77	21.69	30.21	47.29	39.4
PGAL8A_00091600	3450	1473	42.7	PF3D7_0418100	protein SOC1, putative		0.0293	0.1225	0.187	0.0023	0.1512	0.0374	0.1218	0.1372	0.1427	0.1438	0.1217	0.1209	0.1483	0.1614	0.1547	0.1593	0.1773	0.1904	0.1862	0.1765	0.1864	0.1915	0.1873	0.2019	0.1913	0.2077	0.1945	0.0264	22.788	0.01444	3077	2628	2487	3154	2755	2728	2638	2869	78.93	69.59	39.83	24.52	34.24
PGAL8A_00091700	1290	1125	87.21	PF3D7_0418200	eukaryotic translation initiation factor 3 subunit M, putative		0.0219	0.0949	0.1333	0.0104	0.0787	0.023	0.0889	0.0817	0.0813	0.0846	0.0961	0.0901	0.0809	0.0747	0.0812	0.0867	0.1286	0.115	0.1174	0.1191	0.1234	0.1081	0.1119	0.1125	0.1124	0.1118	0.1164	0.0283	201.381	0.01756	3420	3112	3089	1124	3667	3436	3217	3605	88.37	87.81	83.4	74.69	73.91
PGAL8A_00091900	333	228	68.47	PF3D7_0418400	conserved Plasmodium protein, unknown function		0.1162	0.2292	0.2783	0.0251	0.2821	0.0567	0.2533	0.2795	0.2943	0.295	0.1995	0.2228	0.2429	0.2408	0.2847	0.2907	0.2553	0.3353	0.3699	0.2829	0.3087	0.3691	0.3759	0.3578	0.3531	0.3542	0.393	0.0665	8.41	0.37548	344	1088	1599	138	1312	1886	870	1200	50.03	74.05	35.23	22.1	64.5
PGAL8A_00092000	564	486	86.17	PF3D7_0418500	trafficking protein particle complex subunit 3, putative		0.0156	0.0437	0.0579	0	0.0571	0.0027	0.044	0.0539	0.0751	0.0753	0.0383	0.0385	0.043	0.0457	0.0651	0.0652	0.0548	0.0651	0.0718	0.0538	0.0579	0.0662	0.0721	0.0713	0.0793	0.0746	0.0825	0.0053	72.067	0.00732	3720	3910	3895	3943	3876	4194	3906	3904	64.62	74.12	74.03	61.69	81.88
PGAL8A_00092100	4065	1533	37.71	PF3D7_0418600	regulator of chromosome condensation, putative		0.0757	0.217	0.278	0.0095	0.2164	0.0414	0.2149	0.2139	0.306	0.3143	0.2203	0.2193	0.2205	0.2324	0.3101	0.3202	0.2705	0.3345	0.3481	0.2663	0.275	0.3333	0.3476	0.35	0.3633	0.3536	0.3773	0.0688	4.681	0.0415	1089	1216	1602	1301	1975	2533	1249	1892	33.6	26.47	50.84	73.53	10.39
PGAL8A_00092200	1698	735	43.29	PF3D7_0418700	RNA-binding protein NOB1, putative		0.0294	0.1	0.1594	0.0032	0.1379	0.0334	0.0999	0.1456	0.0997	0.0975	0.0987	0.0987	0.1385	0.1333	0.1011	0.1069	0.177	0.1555	0.1524	0.1773	0.1598	0.1555	0.1523	0.1715	0.1648	0.1546	0.149	0.0236	31.887	0.0307	3070	3014	2802	2874	2916	2942	3024	2754	82.34	78.8	47.08	51.24	36.02
PGAL8A_00092300	804	645	80.22	PF3D7_0418800	MOLO1 domain-containing protein, putative		0.0322	0.111	0.1657	0.0073	0.1419	0.0265	0.1133	0.1287	0.1168	0.1091	0.1071	0.109	0.1303	0.1376	0.1076	0.1004	0.1566	0.141	0.133	0.1591	0.1674	0.1432	0.1351	0.1508	0.1411	0.1578	0.1477	0.0148	13.424	0.08368	2941	2814	2731	1749	2865	3281	2786	2994	34.1	11.16	8.22	5.14	94.91
PGAL8A_00092400	1128	735	65.16	PF3D7_0418900	conserved Plasmodium protein, unknown function		0.0569	0.222	0.3322	0.0165	0.225	0.0278	0.2199	0.2423	0.2141	0.2237	0.2372	0.2316	0.2514	0.233	0.219	0.2221	0.3422	0.3073	0.313	0.3351	0.3237	0.3053	0.3122	0.2866	0.3007	0.2656	0.2788	0.0304	9.394	0.07384	1781	1168	1185	490	1889	3218	1193	1575	25.84	23.4	35.94	28.46	53.19
PGAL8A_00092500	1332	600	45.05	PF3D7_0419000	conserved Plasmodium protein, unknown function		0.065	0.1818	0.2427	0.0043	0.1598	0.0493	0.1775	0.1675	0.1989	0.2015	0.1944	0.1894	0.1509	0.1431	0.1839	0.1868	0.2445	0.2332	0.2484	0.2392	0.2377	0.2266	0.2416	0.2319	0.2371	0.2332	0.2262	0.029	8.457	0.0669	1449	1667	1926	2565	2651	2189	1721	2473	7.28	5.97	30.98	27.03	74.52
PGAL8A_00092600	747	504	67.47	PF3D7_0419100	conserved Plasmodium protein, unknown function		0.1079	0.2983	0.7042	0.0129	0.551	0.1351	0.286	0.5109	0.2754	0.2815	0.2639	0.2525	0.4745	0.5217	0.265	0.2705	0.6166	0.348	0.3382	0.5916	0.6747	0.333	0.3226	0.4627	0.5072	0.5404	0.5945	0.0375	8.509	0.2006	429	568	133	799	241	279	647	236	10.73	35.33	22.81	19.85	57.4
PGAL8A_00092700	411	237	57.66	PF3D7_0419200	protein transport protein GOT1, putative		0.0154	0.13	0.1704	0.0062	0.0936	0.0235	0.1209	0.1043	0.1444	0.1403	0.1152	0.1234	0.1093	0.1014	0.1668	0.1624	0.161	0.2213	0.2112	0.1538	0.1598	0.2086	0.1999	0.1396	0.1372	0.1213	0.1209	0.0231	14.393	0.02178	3727	2484	2667	2001	3478	3407	2651	3318	57.49	49.35	54.42	65.12	80.77
PGAL8A_00092800	969	441	45.51	PF3D7_0419300	conserved Plasmodium protein, unknown function		0.0632	0.2257	0.3499	0.0112	0.254	0.0809	0.2174	0.2283	0.1987	0.1927	0.2431	0.2347	0.2495	0.2573	0.2145	0.2087	0.3206	0.2844	0.2699	0.3211	0.3517	0.2899	0.2767	0.2527	0.2527	0.2554	0.2552	0.0132	18.712	0.0643	1518	1127	1080	1007	1576	1092	1221	1720	26.51	18.4	67.89	72.51	53.21
PGAL8A_00092900	6189	3102	50.12	PF3D7_0419400	conserved Plasmodium protein, unknown function		0.1391	0.4186	0.5674	0.0283	0.4731	0.1037	0.4289	0.4509	0.4228	0.4351	0.4324	0.4383	0.4648	0.4791	0.4432	0.4449	0.5473	0.5427	0.5425	0.5582	0.5732	0.5622	0.5494	0.5325	0.5326	0.5494	0.5579	0.0601	12.834	0.1126	180	195	300	89	385	659	178	366	13.07	9.11	55.44	73.95	12
PGAL8A_00093000	1374	543	39.52	PF3D7_0419500	conserved Plasmodium membrane protein, unknown function		0.0772	0.2318	0.4222	0.0087	0.315	0.0509	0.2415	0.3141	0.3383	0.351	0.2604	0.273	0.2981	0.3005	0.4079	0.3916	0.4402	0.413	0.4226	0.445	0.4264	0.4164	0.4267	0.5399	0.5403	0.5378	0.5373	0.0489	7.649	0.07298	1046	1059	703	1461	1071	2117	973	951	57.82	43.71	43.66	53.78	45.7
PGAL8A_00093100	873	450	51.55	PF3D7_0419600	ran-specific GTPase-activating protein 1, putative		0.0105	0.0299	0.0225	0.0001	0.0369	0.0029	0.03	0.0326	0.0321	0.0353	0.0291	0.0292	0.0262	0.0306	0.0318	0.035	0.0185	0.0272	0.027	0.0185	0.0227	0.0269	0.0267	0.0114	0.0115	0.0149	0.0151	0.0053	653.79	0.00428	3938	4060	4169	3612	4068	4189	4060	4097	97.52	94.27	95.78	92.92	90.91
PGAL8A_00093200	855	219	25.61	PF3D7_0419700	apical merozoite protein	PV2	0.0889	0.3206	0.5454	0.0217	0.3832	0.1024	0.3537	0.3899	0.3915	0.391	0.3274	0.3635	0.4889	0.4696	0.3831	0.4123	0.6056	0.6231	0.6475	0.5906	0.5597	0.5984	0.6286	0.497	0.4779	0.4901	0.4637	0.0336	141.541	0.0617	741	464	337	219	688	684	348	552	62.51	23.03	64.7	83.43	52.03
PGAL8A_00093300	666	417	62.61	PF3D7_0419800	60S ribosomal protein L7ae/L30e, putative		0.0204	0.1615	0.2419	0.0139	0.2207	0.051	0.1674	0.1775	0.1636	0.1516	0.165	0.1709	0.2021	0.2448	0.177	0.1623	0.2087	0.2407	0.2169	0.2142	0.2396	0.2381	0.2159	0.2152	0.1893	0.2304	0.2032	0.0182	18.851	0.0463	3503	1973	1936	710	1934	2110	1880	2339	93.72	82.86	69.67	76.72	81.2
PGAL8A_00093400	13173	3765	28.58	PF3D7_0419900	phosphatidylinositol 4-kinase, putative		0.0894	0.2746	0.4354	0.0235	0.3973	0.095	0.265	0.3884	0.2822	0.2772	0.2689	0.2652	0.358	0.3736	0.2642	0.2552	0.3983	0.3274	0.3191	0.3919	0.4297	0.3212	0.3106	0.3799	0.3764	0.3966	0.3962	0.0227	38.09	0.08488	727	716	643	172	620	785	785	556	78.62	74.4	60.93	71.01	34.74
PGAL8A_00093500	9825	1536	15.63	PF3D7_0420000	zinc finger protein, putative		0.1168	0.4717	0.7577	0.027	0.7543	0.1624	0.4707	0.6727	0.6214	0.5998	0.4809	0.4898	0.6831	0.7684	0.638	0.6265	0.6646	0.6111	0.6027	0.6692	0.7736	0.6131	0.6126	0.7786	0.7914	0.7494	0.7869	0.0287	96.423	0.1146	338	127	98	108	67	125	128	86	78.64	81.95	52.33	47.64	31.57
PGAL8A_00093600	2163	978	45.21	PF3D7_0420100	serine/threonine protein kinase RIO2	PfRIO2	0.0158	0.0924	0.1781	0.0135	0.1379	0.029	0.092	0.125	0.0808	0.0783	0.091	0.089	0.1293	0.1387	0.0898	0.0871	0.1603	0.1176	0.1223	0.1577	0.173	0.1112	0.1166	0.1188	0.124	0.1367	0.1424	0.0047	96.18	0.0426	3707	3158	2589	748	2916	3160	3162	3040	86.15	88.97	73.55	75.35	74.36
PGAL8A_00093800	1566	801	51.15	PF3D7_0420200	holo-[acyl-carrier-protein] synthase, putative		0.0398	0.1444	0.268	0.0091	0.2478	0.0788	0.1507	0.2135	0.1832	0.1746	0.1605	0.1623	0.2213	0.2556	0.2044	0.1952	0.2394	0.2112	0.2101	0.2378	0.2725	0.2188	0.2163	0.2461	0.2514	0.2739	0.2699	0.0367	39.588	0.06356	2549	2261	1684	1374	1637	1153	2150	1895	46.13	26.41	28.13	5.14	19.12
PGAL8A_00093900	7902	2970	37.59	PF3D7_0420300	AP2 domain transcription factor, putative		0.0684	0.273	0.2463	0.0087	0.2585	0.0655	0.2707	0.2593	0.2892	0.287	0.2711	0.2695	0.2666	0.2604	0.2856	0.2822	0.2425	0.2855	0.2888	0.2429	0.248	0.2912	0.2933	0.2568	0.254	0.2626	0.2601	0.0263	138.721	0.05652	1297	732	1889	1461	1532	1557	743	1396	86.86	90.62	85.11	88.84	51.83
PGAL8A_00094000	783	417	53.26	PF3D7_0420400	ribosome-recycling factor		0.0781	0.1525	0.4104	0.0118	0.4412	0.1185	0.1617	0.378	0.1732	0.1759	0.1476	0.1613	0.3578	0.4406	0.1766	0.1656	0.3437	0.1831	0.1916	0.3431	0.4107	0.1962	0.2042	0.2625	0.266	0.3289	0.327	0.018	26.312	0.08462	1013	2132	757	926	469	440	1980	591	28.58	41.13	27.14	43.64	68.76
PGAL8A_00094500	483	471	97.52	PF3D7_0730400	IMP1-like protein, putative		0.0259	0.1628	0.1845	0	0.1583	0.0354	0.1628	0.1456	0.1886	0.1835	0.1613	0.1613	0.1389	0.1574	0.1826	0.1777	0.1708	0.153	0.1473	0.1708	0.1845	0.153	0.1473	0.1553	0.151	0.1463	0.1419	0.0081	24.137	0.07004	3240	1954	2517	3943	2668	2843	1961	2754	62.85	38.79	77.36	85.27	85.86
PGAL8A_00094600	4437	1473	33.2	PF3D7_0730300	AP2 domain transcription factor AP2-L, putative	ApiAP2	0.0683	0.1907	0.2016	0.0094	0.2002	0.0631	0.1927	0.216	0.2562	0.2466	0.18	0.1808	0.2139	0.2063	0.2381	0.226	0.2036	0.2298	0.2301	0.2048	0.203	0.2323	0.2321	0.2349	0.2296	0.2292	0.2247	0.0274	38.162	0.08448	1300	1529	2344	1327	2157	1636	1510	1866	92.78	93.04	80.73	58.01	24.79
PGAL8A_00094700	2565	1929	75.2	PF3D7_0730200	AP-4 complex subunit beta, putative		0.0256	0.0791	0.0887	0.0006	0.0825	0.0112	0.0799	0.0816	0.0993	0.0979	0.0851	0.086	0.0768	0.0746	0.0949	0.0918	0.087	0.1049	0.1036	0.088	0.0897	0.1049	0.1035	0.093	0.0901	0.0923	0.0891	0.0053	26.25	0.02036	3255	3378	3622	3558	3621	3918	3372	3607	36.52	42.37	44.3	35.85	18.87
PGAL8A_00094800	2565	1524	59.42	PF3D7_0730100	tRNA pseudouridine synthase D, putative		0.0893	0.1903	0.3166	0.013	0.2734	0.069	0.1941	0.2646	0.245	0.2425	0.2117	0.2197	0.2534	0.2693	0.249	0.2458	0.2996	0.2912	0.2822	0.3051	0.3199	0.2941	0.287	0.2905	0.2746	0.3032	0.2846	0.0249	6.134	0.0933	728	1534	1295	792	1392	1449	1481	1345	27.47	45.8	17.02	22.3	12.74
PGAL8A_00094900	330	189	57.27	PF3D7_0730000	conserved Plasmodium protein, unknown function		0.0342	0.182	0.1543	0.0067	0.1711	0.0299	0.172	0.1745	0.229	0.2245	0.1512	0.1425	0.1751	0.1825	0.252	0.2615	0.1816	0.21	0.2033	0.1716	0.1442	0.1909	0.1941	0.1918	0.1987	0.1866	0.1683	0.0143	17.878	0.13404	2847	1662	2866	1885	2517	3115	1820	2387	19.71	50.76	32.8	21.46	57.97
PGAL8A_00095000	14730	12759	86.62	PF3D7_0729900	dynein heavy chain, putative		0.0223	0.0731	0.0932	0.0022	0.083	0.0201	0.074	0.0818	0.1089	0.1063	0.0734	0.0739	0.0838	0.0854	0.1099	0.1071	0.0906	0.1151	0.1132	0.0911	0.0936	0.1152	0.1131	0.12	0.1167	0.1193	0.1165	0.007	12.35	0.02916	3401	3481	3574	3188	3610	3563	3476	3603	14.61	14.41	12.55	21.62	10.75
PGAL8A_00095100	294	237	80.61	PF3D7_0729800	dynein light chain, putative		0.0103	0.0393	0.0679	0	0.0562	0.0157	0.0393	0.0451	0.0508	0.0514	0.0343	0.0343	0.0502	0.0624	0.0484	0.0485	0.0726	0.0578	0.058	0.0726	0.0679	0.0578	0.0582	0.074	0.0743	0.0825	0.0829	0.0158	1.151	0.02062	3942	3960	3802	3943	3896	3747	3958	3994	2.84	1.22	1.45	32.92	46.88
PGAL8A_00095200	2346	1725	73.53	PF3D7_0729700	conserved Plasmodium protein, unknown function		0.0862	0.2098	0.2795	0.0084	0.2419	0.0566	0.2016	0.2386	0.242	0.2389	0.2043	0.1966	0.2365	0.2393	0.2281	0.2267	0.278	0.261	0.2564	0.2736	0.2716	0.2512	0.2451	0.2591	0.2629	0.2567	0.264	0.0245	6.743	0.0739	807	1298	1587	1519	1713	1891	1393	1616	9.74	7.67	14.58	40.16	25.38
PGAL8A_00095400	2298	1071	46.61	PF3D7_0729500	mRNA (N6-adenosine)-methyltransferase, putative		0.0237	0.0498	0.07	0.0022	0.0713	0.0186	0.0473	0.0605	0.0818	0.0821	0.0472	0.0493	0.0695	0.0793	0.0804	0.0806	0.0587	0.0838	0.083	0.0571	0.0695	0.0826	0.0817	0.0861	0.0832	0.0862	0.0833	0.0078	19.697	0.02502	3328	3837	3786	3188	3744	3621	3866	3836	69.96	75.06	56.71	45.91	24.3
PGAL8A_00095500	1287	663	51.52	PF3D7_0729400	ribosome biogenesis protein BRX1, putative		0.0191	0.0448	0.073	0	0.0605	0.0166	0.0452	0.0562	0.0707	0.0682	0.0464	0.0466	0.0533	0.062	0.0655	0.0667	0.0704	0.0851	0.0819	0.0707	0.0733	0.085	0.0818	0.0972	0.0947	0.0975	0.0951	0.0091	29.589	0.013	3557	3899	3764	3943	3839	3697	3891	3886	85.75	92.31	73.81	57.61	59.27
PGAL8A_00095600	2259	1398	61.89	PF3D7_0729300	60S ribosomal export protein NMD3, putative		0.0456	0.1257	0.186	0.0042	0.1776	0.0244	0.1263	0.1728	0.1732	0.1732	0.1235	0.1202	0.1692	0.1742	0.1753	0.1831	0.1672	0.1801	0.1751	0.167	0.1819	0.1811	0.1786	0.1982	0.1968	0.209	0.2103	0.0252	19.455	0.03782	2293	2567	2497	2591	2418	3367	2563	2407	78.71	78.02	38.13	24.32	29.5
PGAL8A_00095700	714	591	82.77	PF3D7_0729200	1-cys peroxiredoxin	prx	0.0513	0.0979	0.1584	0.0039	0.123	0.0434	0.0997	0.111	0.1238	0.1201	0.1312	0.1326	0.1541	0.1639	0.1661	0.1619	0.144	0.1414	0.1322	0.1467	0.1578	0.1434	0.1341	0.1518	0.151	0.1457	0.1453	0.0132	4.715	0.0975	2028	3057	2813	2676	3122	2456	3028	3247	24.47	24.63	49.73	43.6	74.55
PGAL8A_00095800	7446	2700	36.26	PF3D7_0729100	conserved Plasmodium protein, unknown function		0.0847	0.2665	0.3577	0.0151	0.2934	0.0683	0.2679	0.2861	0.3242	0.324	0.2706	0.2726	0.2912	0.2963	0.3132	0.3097	0.3597	0.3672	0.3575	0.3648	0.3585	0.3716	0.3627	0.3518	0.344	0.3716	0.3617	0.0231	56.332	0.0905	844	771	1031	596	1223	1466	765	1145	33.79	44.49	54.23	45.2	42.82
PGAL8A_00095900	300	282	94	PF3D7_0729000	signal recognition particle subunit SRP9		0.0642	0.1263	0.1938	0.0044	0.1575	0.0384	0.1325	0.1636	0.1796	0.1592	0.1642	0.1598	0.2085	0.2004	0.2082	0.179	0.1952	0.1751	0.144	0.1999	0.1983	0.1815	0.15	0.2282	0.2108	0.2189	0.2021	0.0223	27.192	0.13394	1490	2552	2409	2528	2680	2684	2459	2533	44.85	57.66	44.82	48.11	76.47
PGAL8A_00096000	1506	789	52.39	PF3D7_0728900	RNA-binding protein, putative		0.0431	0.118	0.163	0.0063	0.1077	0.0299	0.114	0.1072	0.1014	0.096	0.1412	0.1368	0.1157	0.1197	0.1096	0.1058	0.1652	0.1472	0.1484	0.1652	0.163	0.1426	0.1436	0.123	0.1192	0.1367	0.1325	0.009	43.224	0.0701	2411	2706	2758	1967	3307	3115	2774	3280	87	74.23	67.16	65.22	70.42
PGAL8A_00096100	1149	771	67.1	PF3D7_0728800	conserved Plasmodium protein, unknown function		0.0705	0.2038	0.3056	0.0246	0.2626	0.0559	0.2182	0.262	0.2746	0.2753	0.2123	0.2264	0.2396	0.2413	0.2831	0.2728	0.2761	0.2815	0.2783	0.305	0.3313	0.3103	0.3076	0.3064	0.313	0.3275	0.3297	0.0127	32.363	0.14122	1243	1360	1376	152	1483	1924	1213	1369	39.73	46.94	60.1	40.75	42.48
PGAL8A_00096200	2466	972	39.42	PF3D7_0728700	alpha/beta hydrolase, putative		0.1066	0.169	0.1821	0.0026	0.1879	0.0542	0.1682	0.1967	0.2294	0.2293	0.155	0.1582	0.2184	0.1974	0.2224	0.2256	0.1949	0.2276	0.2282	0.1926	0.1774	0.2262	0.2269	0.2276	0.2338	0.219	0.2201	0.0198	1.991	0.0755	445	1850	2546	3074	2304	1981	1867	2084	18.68	12.36	18.78	28.61	43.03
PGAL8A_00096300	5592	1626	29.08	PF3D7_0728600	RING zinc finger protein, putative		0.0727	0.171	0.2307	0.0071	0.1721	0.0311	0.1682	0.1794	0.2488	0.2509	0.1803	0.1797	0.1857	0.1789	0.2562	0.2567	0.2344	0.2601	0.2549	0.2347	0.2276	0.2593	0.2539	0.2954	0.2929	0.3025	0.3036	0.0149	48.61	0.0762	1173	1830	2045	1799	2504	3067	1867	2314	35.57	34.85	64.13	71.59	62.09
PGAL8A_00096400	390	276	70.77	PF3D7_0728500	conserved Plasmodium protein, unknown function		0.0268	0.2213	0.2988	0.0096	0.1921	0.0374	0.2214	0.1786	0.1813	0.185	0.218	0.2206	0.1926	0.2054	0.1762	0.189	0.2807	0.3161	0.328	0.274	0.2906	0.3186	0.3297	0.285	0.2897	0.2663	0.2717	0.0285	10.307	0.0695	3195	1175	1444	1279	2255	2728	1176	2324	7.48	22.23	15.86	19.57	76.56
PGAL8A_00096600	645	543	84.19	PF3D7_0728300	conserved Plasmodium protein, unknown function		0.0265	0.0655	0.0873	0.0023	0.0652	0.0178	0.0668	0.0649	0.0363	0.0395	0.0507	0.0516	0.0804	0.0775	0.0373	0.045	0.0932	0.0617	0.0644	0.0951	0.0893	0.0628	0.0655	0.0812	0.0651	0.0719	0.0557	0.0161	194.271	0.024	3210	3618	3643	3154	3794	3645	3600	3789	37.63	40.16	56.69	70.57	93.11
PGAL8A_00096700	1515	939	61.98	PF3D7_0728200	actin-like protein, putative		0.0709	0.1781	0.2585	0.0056	0.2006	0.0514	0.1744	0.2121	0.1581	0.161	0.1936	0.1875	0.1921	0.2013	0.167	0.1704	0.2602	0.232	0.2261	0.2551	0.2524	0.2281	0.2198	0.2257	0.2121	0.2193	0.2062	0.0242	8.536	0.07372	1230	1722	1788	2148	2152	2095	1785	1912	17.48	18	37.67	37.84	32.7
PGAL8A_00096800	13479	5109	37.9	PF3D7_0728100	conserved Plasmodium membrane protein, unknown function		0.0867	0.3072	0.4164	0.0181	0.3396	0.0801	0.3053	0.3159	0.2694	0.2712	0.2905	0.2906	0.2903	0.3157	0.2575	0.2601	0.3976	0.3601	0.3631	0.3962	0.416	0.3615	0.363	0.3487	0.347	0.3708	0.3726	0.02	34.956	0.1024	793	527	730	378	915	1119	536	940	11.42	19.16	35.57	40.12	38.19
PGAL8A_00096900	999	798	79.88	PF3D7_0728000	eukaryotic translation initiation factor 2 subunit alpha, putative		0.0092	0.0434	0.0664	0.0001	0.0482	0.0089	0.0435	0.0453	0.0524	0.0505	0.0403	0.0403	0.0415	0.0403	0.0501	0.048	0.0632	0.0673	0.0665	0.0633	0.0665	0.0673	0.0664	0.052	0.0478	0.0535	0.0493	0.0044	449.388	0.01042	3975	3916	3814	3612	3964	4003	3912	3992	96.3	93.44	94.89	92.11	75.26
PGAL8A_00097000	5547	2271	40.94	PF3D7_0727900	conserved Plasmodium protein, unknown function		0.0948	0.2901	0.397	0.0267	0.3738	0.0816	0.2927	0.3639	0.2877	0.2834	0.2926	0.2946	0.3635	0.37	0.2771	0.2789	0.3998	0.3186	0.3177	0.3971	0.4004	0.3239	0.3184	0.4276	0.3968	0.4224	0.3973	0.0484	27.108	0.0988	609	616	813	114	729	1078	603	659	69.4	47.34	29.95	41.65	23.61
PGAL8A_00097100	4833	2787	57.67	PF3D7_0727800	cation transporting ATPase, putative		0.0373	0.1236	0.1489	0.0077	0.1115	0.033	0.1243	0.1075	0.1157	0.1211	0.1205	0.123	0.111	0.1164	0.1136	0.1183	0.1493	0.1449	0.1475	0.1509	0.1504	0.1479	0.1502	0.1342	0.1391	0.14	0.1441	0.0232	44.658	0.03504	2674	2604	2915	1669	3270	2965	2594	3277	64.05	79.5	73.2	71.58	43.97
PGAL8A_00097200	2244	1131	50.4	PF3D7_0727700	conserved Plasmodium protein, unknown function		0.0449	0.2777	0.518	0.0102	0.3855	0.0861	0.2721	0.3472	0.29	0.3066	0.2746	0.2684	0.3349	0.3789	0.292	0.3073	0.504	0.4145	0.3927	0.4843	0.507	0.4089	0.3909	0.4879	0.5136	0.5285	0.5318	0.0674	12.455	0.12512	2327	696	395	1159	677	977	735	750	10.26	42.93	29.32	25.82	34.91
PGAL8A_00097300	2901	1386	47.78	PF3D7_0727600	conserved Plasmodium protein, unknown function		0.0895	0.2746	0.4407	0.0215	0.3555	0.1025	0.2695	0.3373	0.2403	0.2339	0.2788	0.2762	0.3229	0.3608	0.2502	0.2506	0.3852	0.3478	0.3413	0.3951	0.445	0.3412	0.3361	0.3542	0.3564	0.4223	0.4325	0.0585	12.265	0.1166	726	716	629	231	818	683	749	802	20.13	41.98	18.9	19.39	14.3
PGAL8A_00097400	2040	900	44.12	PF3D7_0727500	mTERF domain-containing protein, putative		0.0715	0.1632	0.1886	0.017	0.1407	0.0335	0.1649	0.1435	0.1858	0.1866	0.159	0.1664	0.1561	0.1586	0.1966	0.191	0.1965	0.2143	0.2049	0.2033	0.1923	0.2123	0.2003	0.1801	0.1688	0.1692	0.1635	0.0393	73.274	0.05696	1208	1947	2464	448	2883	2936	1928	2794	13.26	31.71	46.32	48.68	37.25
PGAL8A_00097500	771	765	99.22	PF3D7_0727400	proteasome subunit alpha type-5, putative		0.0125	0.0322	0.0286	0.0064	0.0262	0.0126	0.0358	0.0269	0.0335	0.0323	0.0357	0.0393	0.0277	0.0269	0.0354	0.0339	0.0261	0.039	0.0374	0.0301	0.0329	0.0425	0.041	0.0273	0.0257	0.0286	0.0269	0.0049	252.543	0.01808	3857	4044	4131	1943	4141	3865	4000	4140	92.7	90.93	96.28	96.33	91.34
PGAL8A_00097600	2217	1125	50.74	PF3D7_0727300	DNA (cytosine-5)-methyltransferase		0.0887	0.2145	0.3153	0.0064	0.2723	0.0644	0.2118	0.2204	0.1902	0.1904	0.2238	0.2196	0.2345	0.2689	0.1994	0.1939	0.2817	0.2432	0.243	0.2801	0.3098	0.2397	0.2394	0.2267	0.225	0.2526	0.2608	0.0298	22.397	0.06472	746	1238	1310	1943	1404	1595	1284	1817	55.32	63.63	40.45	48.14	22.92
PGAL8A_00097700	1575	1341	85.14	PF3D7_0727200	cysteine desulfurase, putative	IscS	0.0473	0.0998	0.1228	0.0062	0.1235	0.0393	0.103	0.1185	0.1219	0.1243	0.0948	0.0991	0.1223	0.1173	0.122	0.1204	0.1191	0.1196	0.1233	0.1214	0.1252	0.1173	0.1208	0.1387	0.1341	0.1455	0.1403	0.0235	43.777	0.04176	2219	3019	3209	2001	3114	2635	2954	3147	77.93	75.84	51.51	35.2	36
PGAL8A_00097900	2877	1155	40.15	PF3D7_0727000	vacuolar protein sorting-associated protein 53, putative		0.0753	0.236	0.3497	0.0153	0.2254	0.0782	0.2374	0.2048	0.2526	0.2533	0.2265	0.2298	0.1953	0.2121	0.2764	0.2875	0.3111	0.3537	0.3768	0.3164	0.3585	0.354	0.3804	0.3238	0.3259	0.358	0.3638	0.097	24.748	0.08132	1101	1021	1081	578	1880	1168	1009	1999	45.82	58.21	67.65	81.15	75.85
PGAL8A_00098000	1377	771	55.99	PF3D7_0726900	mitochondrial import inner membrane translocase subunit TIM50, putative		0.0293	0.076	0.0987	0.003	0.0855	0.0483	0.0758	0.0916	0.1022	0.1117	0.0832	0.085	0.0997	0.0816	0.1034	0.1067	0.0988	0.1061	0.1118	0.0984	0.0986	0.106	0.1153	0.1337	0.1438	0.1172	0.1273	0.0367	69.598	0.02776	3077	3426	3514	2943	3582	2240	3436	3474	43.67	65.84	50.5	34.85	26.03
PGAL8A_00098100	324	222	68.52	PF3D7_0726800	dolichyl-diphosphooligosaccharide--protein glycosyltransferase subunit DAD1, putative		0.0449	0.1559	0.1755	0.0064	0.2623	0.0647	0.1466	0.2006	0.2537	0.2425	0.1334	0.1242	0.1962	0.2593	0.2373	0.2271	0.1461	0.2015	0.208	0.1361	0.1651	0.2116	0.2178	0.2732	0.3003	0.3221	0.3241	0.0559	66.695	0.0866	2327	2070	2624	1943	1493	1579	2224	2043	18.27	47.71	35.62	47.52	72.58
PGAL8A_00098200	501	438	87.43	PF3D7_0726700	conserved Plasmodium protein, unknown function		0.0644	0.1801	0.2518	0.0107	0.2032	0.0268	0.1804	0.2062	0.1925	0.1878	0.1903	0.1906	0.2091	0.1989	0.2063	0.2086	0.2605	0.234	0.237	0.2538	0.245	0.2362	0.2408	0.2271	0.2269	0.211	0.2111	0.0403	98.464	0.05122	1481	1691	1837	1086	2118	3267	1684	1983	33.04	45.66	66	42.26	90.57
PGAL8A_00098300	1947	651	33.44	PF3D7_0726600	conserved Plasmodium protein, unknown function		0.072	0.1966	0.273	0.0071	0.264	0.0674	0.1995	0.2579	0.3249	0.3169	0.1655	0.1679	0.2605	0.258	0.3257	0.3331	0.2872	0.3175	0.3347	0.2869	0.2732	0.3183	0.3357	0.3641	0.3498	0.3952	0.3952	0.0424	35.284	0.0483	1193	1456	1640	1799	1473	1499	1419	1414	20.46	17.47	41.19	43.83	27.71
PGAL8A_00098400	8520	4083	47.92	PF3D7_0726500	ubiquitin carboxyl-terminal hydrolase, putative		0.023	0.1365	0.1711	0.0062	0.1247	0.0371	0.1366	0.1132	0.1547	0.1577	0.1296	0.1289	0.1088	0.1178	0.1548	0.1564	0.1657	0.1995	0.2031	0.1653	0.17	0.1985	0.2033	0.182	0.1814	0.1949	0.1965	0.0271	218.934	0.0253	3360	2396	2660	2001	3095	2746	2393	3219	82.21	78.86	81.41	75.47	69.83
PGAL8A_00098500	12543	4911	39.15	PF3D7_0726400	conserved Plasmodium membrane protein, unknown function		0.102	0.3563	0.615	0.0238	0.53	0.1379	0.3588	0.4763	0.4428	0.4508	0.3604	0.3568	0.4786	0.5166	0.4286	0.4366	0.5965	0.5095	0.5102	0.5921	0.6163	0.5083	0.5107	0.6113	0.6255	0.6459	0.6565	0.0863	19.399	0.12352	494	343	231	165	277	251	342	300	51.71	48.43	48.99	53.56	31.87
PGAL8A_00098600	3798	2049	53.95	PF3D7_0726300	DNA mismatch repair protein PMS1, putative		0.045	0.1131	0.1483	0.0029	0.1621	0.0468	0.1138	0.1478	0.1445	0.1462	0.1023	0.1053	0.144	0.1581	0.1337	0.1376	0.1376	0.1422	0.1486	0.1394	0.1494	0.1462	0.1519	0.1711	0.167	0.1772	0.1788	0.0276	63.091	0.02892	2322	2781	2927	2972	2627	2301	2780	2717	60.33	39.8	49.6	60.45	29.41
PGAL8A_00098700	1449	504	34.78	PF3D7_0102800	conserved Plasmodium protein, unknown function		0.1614	0.3266	0.6237	0.0097	0.5645	0.0887	0.3328	0.5273	0.6869	0.6381	0.3237	0.3298	0.517	0.53	0.6994	0.6812	0.621	0.5252	0.5267	0.5628	0.5993	0.5236	0.5255	0.7637	0.7587	0.7266	0.7546	0.0448	2.562	0.16066	111	436	217	1251	214	919	420	215	29.83	30.36	24.68	39.26	51.05
PGAL8A_00098800	1833	1407	76.76	PF3D7_0102900	aspartate--tRNA ligase // aspartyl-tRNA synthetase		0.0332	0.1053	0.1318	0.0025	0.1306	0.0565	0.107	0.1147	0.1167	0.1142	0.111	0.1127	0.1242	0.1337	0.1165	0.1126	0.1268	0.1211	0.1209	0.127	0.1332	0.1238	0.1225	0.129	0.1278	0.1319	0.136	0.0126	171.122	0.0301	2880	2908	3103	3104	3026	1895	2884	3196	81.31	86.97	75.14	66.02	66.47
PGAL8A_00098900	783	438	55.94	PF3D7_0103000	vacuolar protein sorting-associated protein VTA1, putative		0.0546	0.1287	0.2131	0.011	0.1784	0.048	0.1277	0.1972	0.1664	0.1723	0.125	0.1242	0.2408	0.2235	0.1737	0.1885	0.2152	0.1847	0.1876	0.213	0.2108	0.1846	0.1874	0.2185	0.2256	0.2165	0.2105	0.0154	50.765	0.07302	1888	2508	2213	1046	2407	2252	2535	2079	19.71	24.95	49.42	80.47	77.12
PGAL8A_00099000	4359	1398	32.07	PF3D7_0103100	vacuolar protein sorting-associated protein 51, putative		0.0961	0.321	0.5743	0.0131	0.506	0.1075	0.3284	0.4386	0.4174	0.4074	0.3125	0.315	0.4476	0.5223	0.4229	0.4281	0.5305	0.4988	0.5153	0.5517	0.5908	0.4887	0.4992	0.6542	0.7014	0.7023	0.7572	0.0911	42.388	0.1094	584	461	290	781	319	609	435	397	30.85	12.65	40.73	36.97	20.48
PGAL8A_00099200	1356	687	50.66	PF3D7_0103200	nucleoside transporter 4	ENT4	0.1041	0.2136	0.2273	0.014	0.2622	0.0598	0.2173	0.2872	0.2833	0.2748	0.2183	0.2181	0.2793	0.2615	0.316	0.3165	0.2434	0.2684	0.2614	0.2546	0.2381	0.2711	0.2577	0.3176	0.3149	0.303	0.3009	0.0166	25.055	0.04342	467	1251	2081	700	1496	1768	1222	1131	69.93	89.84	82.55	80.06	89.09
PGAL8A_00099300	2205	1221	55.37	PF3D7_0103300	conserved Plasmodium protein, unknown function		0.0502	0.2098	0.3806	0.0125	0.3095	0.093	0.2159	0.2457	0.1879	0.1915	0.2148	0.2204	0.2519	0.3048	0.1956	0.1953	0.313	0.2493	0.2534	0.3247	0.3937	0.2629	0.2676	0.2969	0.2998	0.3518	0.3551	0.019	28.901	0.04124	2084	1298	909	851	1115	823	1239	1542	76.18	74.88	57.33	59.74	32.2
PGAL8A_00099400	5841	1776	30.41	PF3D7_0103400	zinc-carboxypeptidase, putative		0.086	0.2605	0.4571	0.0217	0.4166	0.1675	0.2528	0.3413	0.3015	0.3027	0.2783	0.274	0.341	0.4235	0.2869	0.2868	0.4055	0.3591	0.3638	0.3866	0.4418	0.355	0.3559	0.3755	0.3914	0.4395	0.4515	0.0284	66.289	0.09612	808	814	562	219	533	111	873	776	50.15	77.69	74.02	76.11	47.52
PGAL8A_00099500	5037	1560	30.97	PF3D7_0103500	conserved Plasmodium protein, unknown function		0.0907	0.4155	0.7211	0.031	0.535	0.1278	0.4062	0.4987	0.454	0.5376	0.4148	0.4039	0.5105	0.5616	0.4467	0.5099	0.6789	0.6057	0.6832	0.6587	0.7049	0.5897	0.6816	0.6609	0.7615	0.7017	0.8045	0.11	7.706	0.18708	699	200	127	61	270	343	226	254	10.32	23.94	23.04	24.52	24.36
PGAL8A_00099600	3906	1272	32.57	PF3D7_0103600	ATP-dependent RNA helicase, putative		0.083	0.1811	0.2917	0.0147	0.3063	0.071	0.1818	0.2921	0.2172	0.2561	0.1796	0.175	0.285	0.2961	0.2028	0.2432	0.267	0.256	0.2714	0.2712	0.2937	0.2579	0.2716	0.2923	0.3156	0.3045	0.3261	0.0534	16.881	0.0755	882	1678	1501	630	1133	1384	1668	1088	41.96	62.1	41.7	44.4	58.7
PGAL8A_00099700	1524	519	34.06	PF3D7_0103700	L-seryl-tRNA(Sec) kinase, putative		0.087	0.299	0.6265	0.0116	0.5085	0.0622	0.292	0.4936	0.3369	0.3326	0.3289	0.3258	0.5579	0.5648	0.3186	0.3146	0.6062	0.3849	0.4114	0.6127	0.6419	0.3712	0.3981	0.6539	0.6597	0.6046	0.6125	0.0487	8.908	0.11084	786	564	211	954	316	1672	607	262	26.07	33.6	23.47	20.17	33.82
PGAL8A_00099800	1017	1011	99.41	PF3D7_0103800	actin-related protein	PfARP1	0.0071	0.0357	0.0431	0.0025	0.017	0.0052	0.033	0.0198	0.0283	0.0295	0.0387	0.037	0.0212	0.0211	0.0296	0.0307	0.0449	0.0544	0.0555	0.0457	0.0431	0.0515	0.0527	0.0279	0.0294	0.0284	0.03	0.0012	18.169	0.0094	4056	4003	4018	3104	4212	4123	4031	4196	49.96	29.65	68.79	78.69	89.13
PGAL8A_00099900	1476	942	63.82	PF3D7_0103900	parasite-infected erythrocyte surface protein		0.0674	0.2814	0.4014	0.0131	0.2831	0.0862	0.2836	0.29	0.2367	0.2432	0.2634	0.2656	0.2699	0.2686	0.2525	0.2451	0.3611	0.3203	0.3082	0.353	0.3885	0.3188	0.3064	0.2963	0.2952	0.3131	0.3222	0.0299	112.619	0.05324	1341	670	795	781	1303	975	657	1109	22.68	51	59.09	53.03	33.3
PGAL8A_00100000	489	255	52.15	PF3D7_0104000	thrombospondin-related sporozoite protein // sporozoite stage TSP1 domain protein	S21	0.2115	0.3755	0.4648	0.0231	0.3576	0.0988	0.3627	0.4339	0.4234	0.4028	0.3577	0.3397	0.377	0.3218	0.4086	0.4009	0.5182	0.4297	0.4178	0.488	0.4386	0.4116	0.3933	0.5044	0.5009	0.4731	0.4641	0.0523	1.046	0.2804	54	291	534	183	811	732	328	417	40.4	28.75	29.13	64.12	73.07
PGAL8A_00100200	2361	1437	60.86	PF3D7_0104100	conserved Plasmodium membrane protein, unknown function		0.1815	0.5306	0.5362	0.0394	0.627	0.1428	0.5298	0.56	0.6477	0.6172	0.4865	0.4841	0.5436	0.5754	0.613	0.5981	0.5118	0.613	0.6148	0.5146	0.5312	0.6164	0.6051	0.6138	0.5799	0.6125	0.5698	0.0857	3.848	0.16004	80	79	359	24	150	212	76	177	19.8	14.87	75.61	95.57	12.01
PGAL8A_00100300	1524	789	51.77	PF3D7_0104200	StAR-related lipid transfer protein		0.0976	0.4863	0.486	0.0102	0.5984	0.1064	0.4688	0.6218	0.6467	0.6563	0.4835	0.4825	0.5807	0.5755	0.6145	0.6378	0.5027	0.6298	0.6415	0.4956	0.4883	0.6071	0.6359	0.5016	0.4907	0.5701	0.5543	0.046	43.529	0.03988	558	107	484	1159	180	622	131	115	52.4	88.19	88.94	90.48	68.82
PGAL8A_00100400	8514	2418	28.4	PF3D7_0104300	ubiquitin carboxyl-terminal hydrolase 1, putative		0.0977	0.2996	0.4035	0.0078	0.3884	0.0745	0.2997	0.3723	0.3655	0.3861	0.2999	0.3015	0.4094	0.4269	0.3945	0.4053	0.3879	0.3805	0.368	0.3844	0.401	0.3782	0.3656	0.4216	0.44	0.4213	0.4458	0.0559	33.629	0.04788	556	557	786	1638	663	1269	557	615	84.85	85.17	74.45	72.84	38.51
PGAL8A_00100500	1437	924	64.3	PF3D7_0104400	4-hydroxy-3-methylbut-2-enyl diphosphate reductase	IspH	0.0416	0.1233	0.1897	0.0221	0.1622	0.074	0.1193	0.1703	0.1223	0.1082	0.1218	0.1182	0.1718	0.1671	0.1159	0.1074	0.1785	0.1481	0.1435	0.1799	0.1956	0.1432	0.1435	0.169	0.1734	0.193	0.1882	0.0302	51.491	0.03958	2482	2612	2452	206	2624	1286	2677	2443	50.79	67.68	75.73	72.88	73.72
PGAL8A_00100600	795	564	70.94	PF3D7_0104500	conserved protein, unknown function		0.0149	0.0949	0.1349	0.0102	0.0825	0.0394	0.0989	0.0931	0.0506	0.0578	0.0969	0.0983	0.1009	0.079	0.0602	0.0651	0.1409	0.1058	0.1195	0.1401	0.1353	0.1062	0.1218	0.1003	0.1022	0.1018	0.1008	0.0213	55.045	0.02184	3756	3112	3071	1159	3621	2630	3047	3459	84.33	80.11	69.9	40.9	85.55
PGAL8A_00100700	3531	1398	39.59	PF3D7_0104600	conserved Plasmodium protein, unknown function		0.1178	0.37	0.6184	0.0235	0.5637	0.0913	0.3592	0.4983	0.3172	0.3147	0.3955	0.3944	0.5315	0.5971	0.3378	0.3392	0.5597	0.4194	0.41	0.5535	0.6182	0.4001	0.3919	0.5199	0.5063	0.5788	0.5578	0.0331	3.487	0.1401	323	303	228	172	218	858	338	256	16.17	37.74	15.91	15.17	20.7
PGAL8A_00100800	1800	1059	58.83	PF3D7_0104700	major facilitator superfamily-related transporter, putative		0.0922	0.1839	0.2389	0.0089	0.206	0.0438	0.1781	0.2117	0.175	0.172	0.1924	0.1901	0.2381	0.2373	0.1895	0.1832	0.2459	0.2006	0.1984	0.2314	0.2292	0.198	0.1959	0.2166	0.2172	0.2321	0.2307	0.0198	9.859	0.07324	662	1631	1966	1417	2096	2439	1715	1918	13.8	11.32	8.15	5.14	13.97
PGAL8A_00100900	1590	1047	65.85	PF3D7_0104800	novel putative transporter 1, putative		0.0538	0.1237	0.1651	0.0157	0.1382	0.055	0.1245	0.1351	0.1485	0.142	0.1339	0.1348	0.157	0.1659	0.1628	0.1559	0.161	0.1681	0.163	0.1619	0.1577	0.1712	0.1667	0.1415	0.1351	0.1427	0.1444	0.0271	33.559	0.06044	1921	2601	2735	549	2912	1957	2592	2900	52.41	36.33	62.02	74.23	69.21
PGAL8A_00101000	429	387	90.21	PF3D7_0105100	conserved Apicomplexan protein, unknown function		0.0362	0.101	0.1333	0.0039	0.0924	0.0129	0.0966	0.0789	0.1007	0.0997	0.0869	0.0913	0.0713	0.0892	0.0947	0.0938	0.1144	0.1442	0.1436	0.1092	0.1276	0.1394	0.1389	0.0896	0.089	0.1072	0.1064	0.0001	21.069	0.10106	2740	2997	3089	2676	3491	3850	3081	3645	9.96	15.27	22.1	38.24	22.55
PGAL8A_00101300	1692	1413	83.51	PF3D7_0105200	RAP protein, putative		0.0218	0.078	0.1236	0.0052	0.1374	0.0368	0.0794	0.14	0.0979	0.0958	0.0774	0.0809	0.1458	0.1461	0.1079	0.1032	0.1223	0.0981	0.0959	0.1217	0.1214	0.0973	0.0961	0.1385	0.1386	0.1406	0.1379	0.0093	77.753	0.05754	3424	3397	3200	2292	2924	2763	3381	2835	48.59	69.31	65.28	48.54	45.54
PGAL8A_00101400	765	414	54.12	PF3D7_0105300	cyclase-associated protein	C-CAP	0.0573	0.1434	0.1561	0	0.1894	0.0721	0.1435	0.1955	0.1728	0.1702	0.1476	0.1477	0.1985	0.1768	0.1615	0.1595	0.1577	0.1638	0.1592	0.1579	0.1562	0.164	0.1598	0.1882	0.1669	0.1792	0.1716	0.027	34.582	0.04962	1761	2288	2846	3943	2286	1358	2285	2099	46.18	23.03	90.84	95.53	88.7
PGAL8A_00101600	1002	774	77.25	PF3D7_0105500	conserved Plasmodium protein, unknown function		0.0324	0.0988	0.202	0.0073	0.1793	0.0494	0.0902	0.1651	0.0916	0.0942	0.1034	0.0949	0.1688	0.1771	0.0917	0.0968	0.187	0.1158	0.1096	0.1772	0.1912	0.1089	0.1027	0.1505	0.1484	0.1715	0.1702	0.0121	18.072	0.0287	2932	3039	2339	1749	2400	2181	3201	2511	18.92	28.82	23.13	27.91	18.76
PGAL8A_00101700	3195	1977	61.88	PF3D7_0105600	conserved Plasmodium protein, unknown function		0.0519	0.1796	0.2992	0.0043	0.28	0.0915	0.1827	0.2535	0.1466	0.1449	0.1719	0.173	0.2448	0.2768	0.1386	0.1388	0.2824	0.1639	0.1657	0.2822	0.2992	0.1667	0.1686	0.2567	0.253	0.2742	0.2684	0.0102	54.418	0.05238	2002	1696	1441	2565	1326	851	1645	1458	70.17	66.42	45.47	49.59	43.61
PGAL8A_00101900	2313	1587	68.61	PF3D7_0105800	conserved Plasmodium protein, unknown function		0.0326	0.1584	0.2682	0.0043	0.2098	0.0515	0.1583	0.1886	0.1955	0.191	0.1619	0.1628	0.1926	0.208	0.1899	0.1863	0.2554	0.2523	0.2467	0.2536	0.2652	0.2509	0.2453	0.2382	0.232	0.2666	0.262	0.0138	113.008	0.02764	2920	2024	1681	2565	2057	2092	2035	2183	31.63	31.42	76.61	84.63	52.9
PGAL8A_00102000	1314	768	58.45	PF3D7_0105900	DNA binding protein, putative		0.0552	0.2541	0.4517	0.0144	0.3332	0.0929	0.2452	0.3011	0.2244	0.2199	0.2416	0.2361	0.3123	0.3351	0.2306	0.2292	0.4143	0.2847	0.2805	0.418	0.4467	0.2848	0.2814	0.3756	0.3702	0.412	0.4005	0.036	24.803	0.08944	1862	869	582	659	948	825	936	1041	25.21	31.97	48.04	60.38	51.72
PGAL8A_00102100	2208	1365	61.82	PF3D7_0106000	conserved Plasmodium protein, unknown function		0.0358	0.1014	0.2031	0.0008	0.1743	0.0341	0.1019	0.1541	0.106	0.1087	0.0986	0.0994	0.1531	0.1769	0.1127	0.1147	0.1861	0.142	0.146	0.1865	0.2036	0.1414	0.1456	0.1907	0.1932	0.2121	0.2088	0.0208	85.911	0.02494	2758	2992	2327	3535	2472	2905	2982	2642	45.53	43.98	62.7	76.68	16.31
PGAL8A_00102200	1152	1008	87.5	PF3D7_0106100	V-type proton ATPase subunit C, putative		0.0082	0.0318	0.0444	0.0011	0.0505	0.0159	0.0305	0.0444	0.0637	0.0626	0.0335	0.031	0.0505	0.0535	0.0646	0.0638	0.038	0.0562	0.0558	0.0365	0.0431	0.0548	0.0541	0.0684	0.0687	0.0747	0.0769	0.0166	27.615	0.00694	4017	4047	4005	3476	3938	3738	4056	3998	69.47	84.51	79.42	75.97	43.79
PGAL8A_00102300	636	429	67.45	PF3D7_0106200	conserved Plasmodium protein, unknown function		0.0818	0.3365	0.4676	0.0169	0.3281	0.0485	0.3376	0.3575	0.3081	0.2871	0.3631	0.3568	0.3871	0.3538	0.3285	0.2831	0.4606	0.3464	0.3375	0.4755	0.4717	0.341	0.3432	0.3476	0.3347	0.3434	0.336	0.0725	8.287	0.26138	914	410	523	453	985	2229	405	690	43.2	26.21	39.18	52.92	46.41
PGAL8A_00102400	3390	2661	78.5	PF3D7_0106300	calcium-transporting ATPase	ATPase6	0.0252	0.0637	0.1025	0.0013	0.0982	0.0374	0.0639	0.0935	0.0761	0.079	0.0643	0.0649	0.0973	0.1008	0.0733	0.0731	0.0981	0.0843	0.0865	0.0976	0.1023	0.0838	0.0873	0.1014	0.1036	0.1067	0.1088	0.0134	87.306	0.01546	3271	3648	3464	3426	3428	2728	3640	3455	90.27	89.22	93.87	96.75	74.09
PGAL8A_00102500	447	264	59.06	PF3D7_0106400	pre-rRNA-processing protein TSR2, putative		0.0653	0.1438	0.2397	0.0158	0.1909	0.0207	0.1505	0.1604	0.208	0.1955	0.1353	0.1417	0.1796	0.2022	0.1906	0.1793	0.2315	0.2044	0.2052	0.2105	0.2188	0.2032	0.204	0.1737	0.1599	0.1745	0.1598	0.0096	37.608	0.14366	1436	2272	1958	537	2272	3540	2155	2573	91.36	82.93	50.19	18.87	89.15
PGAL8A_00102600	3684	867	23.53	PF3D7_0106500	conserved Plasmodium protein, unknown function		0.1665	0.3923	0.9643	0.0187	0.8185	0.2311	0.39	0.7742	0.5433	0.5241	0.3579	0.3571	0.7757	0.8288	0.4481	0.47	0.788	0.5464	0.5165	0.7958	0.9635	0.537	0.5175	0.7037	0.6799	0.8681	0.7903	0.1118	38.564	0.19908	100	250	34	351	50	20	254	42	30.86	13.42	28.3	39.67	16.91
PGAL8A_00102800	3792	2076	54.75	PF3D7_0106700	small ribosomal subunit assembling AARP2 protein // asparagine and aspartate rich protein 2	PfAARP2	0.0277	0.1047	0.1957	0.0023	0.1929	0.0699	0.1046	0.1803	0.1354	0.1386	0.1004	0.1004	0.1705	0.1909	0.1307	0.1317	0.1878	0.1439	0.1481	0.1878	0.1955	0.1433	0.1474	0.1978	0.2041	0.2249	0.222	0.0328	46.717	0.02128	3139	2921	2390	3154	2239	1417	2924	2302	91.5	92.42	79.9	80.01	43.15
PGAL8A_00102900	453	444	98.01	PF3D7_0106800	ras-related protein Rab-5C		0.0049	0.0344	0.0284	0	0.0323	0.0056	0.0346	0.04	0.0717	0.0788	0.032	0.0321	0.0359	0.0283	0.0698	0.0772	0.0336	0.0692	0.0727	0.0336	0.0284	0.0693	0.0728	0.0707	0.0635	0.0637	0.0562	0.0056	22.002	0.00744	4134	4018	4135	3943	4100	4107	4014	4037	38.38	68.69	89.04	90.74	89.67
PGAL8A_00103000	1896	966	50.95	PF3D7_0106900	2-C-methyl-D-erythritol 4-phosphate cytidylyltransferase, putative		0.0644	0.2265	0.4061	0.0107	0.4248	0.1723	0.2276	0.4153	0.2369	0.2378	0.2118	0.2178	0.4103	0.4375	0.2394	0.2362	0.4094	0.2252	0.2226	0.4062	0.4096	0.2253	0.2228	0.4087	0.4207	0.4139	0.4177	0.0333	17.426	0.10414	1481	1120	775	1086	509	95	1111	463	5.38	25.39	38.31	50.42	26.28
PGAL8A_00103200	1320	624	47.27	PF3D7_0107100	conserved Plasmodium protein, unknown function		0.0711	0.178	0.4281	0.0076	0.4381	0.1431	0.1828	0.3907	0.2552	0.2471	0.1598	0.1667	0.3987	0.4042	0.2325	0.2158	0.4105	0.2203	0.2196	0.4116	0.4316	0.2248	0.2281	0.4616	0.4303	0.4942	0.464	0.0254	10.512	0.11714	1220	1725	679	1690	480	207	1639	545	13.71	43.69	33.29	28.12	38.26
PGAL8A_00103300	756	591	78.17	PF3D7_0107200	carbon catabolite repressor protein 4, putative		0.0701	0.2284	0.4473	0.0104	0.4287	0.109	0.2251	0.4038	0.3218	0.3466	0.2398	0.2385	0.4476	0.4512	0.319	0.3474	0.4646	0.318	0.3502	0.4731	0.4619	0.3253	0.3565	0.4893	0.4996	0.5066	0.5059	0.0356	8.636	0.14184	1254	1095	599	1124	495	584	1139	500	19.71	38.7	42.05	30.7	66.67
PGAL8A_00103500	456	408	89.47	PF3D7_0107400	conserved Apicomplexan protein, unknown function		0.0199	0.0947	0.1687	0.0084	0.1758	0.0493	0.0974	0.1481	0.0959	0.0786	0.0903	0.0929	0.1446	0.1709	0.088	0.07	0.1475	0.1013	0.0904	0.1506	0.1727	0.1041	0.0932	0.1325	0.1126	0.1661	0.1462	0.0211	55.1	0.03394	3524	3118	2689	1519	2447	2189	3073	2712	80.18	52.31	66.45	64.2	94.58
PGAL8A_00103600	3960	2454	61.97	PF3D7_0107500	lipid/sterol:H+ symporter		0.0735	0.1405	0.164	0.0024	0.1895	0.0572	0.1393	0.1758	0.238	0.2306	0.139	0.1379	0.1683	0.1891	0.2415	0.2394	0.1651	0.2451	0.2412	0.164	0.1652	0.2425	0.2399	0.2648	0.2556	0.2656	0.2564	0.025	73.603	0.03256	1151	2335	2745	3128	2283	1863	2354	2362	97.13	95.46	90.34	80.73	59.18
PGAL8A_00103900	1212	471	38.86	PF3D7_0107700	conserved Plasmodium membrane protein, unknown function		0.0974	0.1773	0.3472	0.005	0.3144	0.1541	0.1819	0.3193	0.238	0.2638	0.2047	0.2095	0.3398	0.3364	0.2546	0.2554	0.3386	0.2341	0.2426	0.3379	0.3391	0.234	0.2431	0.3226	0.3449	0.3142	0.3371	0.0415	3.576	0.04622	564	1735	1091	2341	1079	161	1664	910	10.91	19.87	29.88	24.22	61.35
PGAL8A_00104000	3426	1290	37.65	PF3D7_0107800	double-strand break repair protein MRE11		0.0458	0.1155	0.2773	0.0097	0.2667	0.0818	0.1147	0.2222	0.1588	0.1557	0.1173	0.1165	0.2223	0.262	0.1506	0.1518	0.229	0.1555	0.163	0.224	0.2714	0.149	0.1588	0.2385	0.2468	0.2831	0.289	0.0321	35.229	0.0429	2283	2743	1612	1251	1447	1073	2762	1794	26.12	49.16	41.98	39.05	25.43
PGAL8A_00104100	666	417	62.61	PF3D7_0107900	conserved Plasmodium protein, unknown function		0.0782	0.2243	0.4392	0.0089	0.3818	0.0944	0.2187	0.3569	0.2411	0.2674	0.246	0.2401	0.3793	0.3807	0.2776	0.2903	0.4172	0.3383	0.3387	0.421	0.4459	0.337	0.3357	0.4528	0.4544	0.4687	0.4263	0.0603	5.516	0.07766	1009	1143	636	1417	693	801	1207	696	33.37	65.53	51.95	38.96	77.17
PGAL8A_00104200	657	612	93.15	PF3D7_0108000	proteasome subunit beta type-3, putative		0.0268	0.0915	0.0978	0.0021	0.0828	0.0153	0.0941	0.0818	0.0869	0.0884	0.0869	0.0896	0.0701	0.0747	0.0803	0.082	0.0951	0.1071	0.1109	0.0981	0.101	0.1099	0.1138	0.1038	0.1	0.1045	0.1008	0.0059	218.621	0.01894	3195	3171	3523	3213	3614	3768	3124	3603	93.8	92.18	96.11	95.14	94.11
PGAL8A_00104300	1899	1086	57.19	PF3D7_0108100	conserved Plasmodium protein, unknown function		0.0605	0.2086	0.3841	0.0268	0.4204	0.1372	0.2019	0.3352	0.1656	0.1583	0.2105	0.2057	0.359	0.4342	0.1696	0.166	0.3443	0.2684	0.2632	0.3396	0.3868	0.2569	0.2517	0.352	0.3345	0.4012	0.398	0.0284	19.2	0.0931	1629	1311	885	113	519	258	1389	813	9.74	26.45	32.72	32.34	49.23
PGAL8A_00104400	6201	1608	25.93	PF3D7_0108300	conserved Plasmodium protein, unknown function		0.033	0.1224	0.1957	0.0077	0.165	0.0598	0.1226	0.1437	0.1363	0.1311	0.1228	0.1245	0.1529	0.1716	0.1403	0.1391	0.1832	0.1643	0.1608	0.1838	0.1957	0.1652	0.1619	0.1845	0.1829	0.2005	0.2049	0.0108	178.432	0.02578	2890	2630	2390	1669	2585	1768	2629	2790	95.9	97.44	92.87	95.64	82.45
PGAL8A_00104600	597	123	20.6	PF3D7_0108500	conserved Plasmodium protein, unknown function		0.0523	0.2821	0.2447	0.0002	0.2725	0.0373	0.2724	0.2358	0.1982	0.2471	0.2718	0.2642	0.2196	0.2534	0.1747	0.2237	0.2244	0.3272	0.3042	0.2226	0.2465	0.3142	0.2984	0.1618	0.1577	0.2148	0.2101	0.0304	179.927	0.01476	1983	659	1904	3573	1402	2735	733	1642	99.98	99.34	99.43	99.58	97.91
PGAL8A_00104700	894	423	47.32	PF3D7_0108600	conserved Plasmodium protein, unknown function		0.0953	0.3638	0.4002	0.0138	0.4014	0.0744	0.3676	0.3753	0.2697	0.2845	0.3575	0.3632	0.327	0.4116	0.233	0.2461	0.3833	0.2887	0.2847	0.3797	0.3978	0.2787	0.2746	0.272	0.261	0.3279	0.3181	0.0158	39.57	0.17242	596	318	798	718	602	1274	313	603	83.49	56.26	61.97	55.98	71.49
PGAL8A_00104800	999	726	72.67	PF3D7_0108800	conserved Plasmodium protein, unknown function		0.0287	0.0782	0.1202	0.0017	0.1244	0.0438	0.08	0.1276	0.1332	0.1314	0.0871	0.0891	0.1366	0.1372	0.1357	0.1362	0.1194	0.1373	0.1349	0.1217	0.1166	0.1347	0.1319	0.1743	0.1716	0.1649	0.1601	0.0097	21.611	0.05232	3099	3395	3244	3337	3100	2439	3371	3007	58.09	73.39	71.33	71.02	81.36
PGAL8A_00104900	669	603	90.13	PF3D7_0109000	photosensitized INA-labeled protein PHIL1, putative		0.0347	0.1618	0.2784	0.0039	0.2926	0.0847	0.1637	0.3016	0.2744	0.2664	0.1894	0.1857	0.2946	0.2865	0.2694	0.2623	0.2844	0.2507	0.2513	0.291	0.2854	0.2536	0.2544	0.3463	0.3421	0.3514	0.3364	0.0228	212.771	0.11564	2815	1966	1598	2676	1228	1000	1945	1033	53.09	31.53	91.43	92.05	98.44
PGAL8A_00105000	2970	2295	77.27	PF3D7_0109100	LCCL domain-containing protein	LAP3	0.0358	0.1188	0.2945	0.0067	0.2649	0.1289	0.1187	0.2408	0.2412	0.241	0.1114	0.1125	0.2338	0.2613	0.2451	0.2431	0.262	0.2664	0.2607	0.2624	0.2929	0.2681	0.2622	0.3597	0.3566	0.3942	0.3944	0.0196	17.547	0.06308	2758	2694	1483	1885	1467	332	2691	1594	10.63	9.73	25.71	49.71	66.51
PGAL8A_00105100	696	486	69.83	PF3D7_0109200	cleavage and polyadenylation specificity factor subunit 5, putative		0.0096	0.0504	0.1375	0.0001	0.1231	0.0486	0.0508	0.121	0.1304	0.1367	0.0529	0.0532	0.1236	0.1259	0.1326	0.1388	0.1301	0.1594	0.1475	0.1305	0.1378	0.1598	0.1478	0.2219	0.2247	0.2354	0.2376	0.0368	28.403	0.01576	3960	3830	3044	3612	3120	2224	3819	3110	68.82	74.55	75.77	69.27	91.97
PGAL8A_00105200	963	636	66.04	PF3D7_0109300	fatty acid elongation protein, GNS1/SUR4 family, putative		0.0584	0.201	0.317	0.0044	0.3088	0.0844	0.1973	0.3128	0.262	0.2219	0.1849	0.1807	0.2859	0.2779	0.2892	0.229	0.3306	0.2919	0.2277	0.33	0.3165	0.2887	0.2247	0.425	0.3503	0.4197	0.342	0.0616	9.124	0.06716	1710	1398	1291	2528	1118	1005	1451	963	7.82	27.11	24.58	31.44	73.53
PGAL8A_00105300	498	372	74.7	PF3D7_0109400	tubulin-specific chaperone a, putative		0.0882	0.2734	0.5	0.0166	0.4376	0.1393	0.2776	0.3832	0.4081	0.368	0.1838	0.194	0.3377	0.4067	0.3641	0.3447	0.3948	0.4675	0.4341	0.3915	0.4951	0.477	0.4432	0.5208	0.5397	0.6089	0.6044	0.0558	55.302	0.19782	754	726	447	479	481	241	697	571	61.97	73.79	74.14	61.71	98.53
PGAL8A_00105400	468	408	87.18	PF3D7_0109500	N-acetyltransferase, putative		0.0147	0.0573	0.0861	0.0028	0.0994	0.0492	0.0601	0.077	0.0689	0.0652	0.0459	0.0487	0.0815	0.0957	0.0573	0.0608	0.1044	0.0846	0.0893	0.1071	0.0893	0.0873	0.092	0.0867	0.0821	0.1073	0.1027	0.0096	29.146	0.037	3766	3740	3660	3014	3413	2196	3700	3665	85.94	94.29	93.79	93.72	96.35
PGAL8A_00105500	423	288	68.09	PF3D7_0109600	cold-shock protein, putative		0.0731	0.1524	0.2459	0.0042	0.2976	0.0576	0.1581	0.25	0.1373	0.1462	0.1203	0.1254	0.2366	0.2748	0.1482	0.1589	0.2026	0.1424	0.1513	0.1954	0.2368	0.1476	0.1568	0.2189	0.2495	0.2594	0.2978	0.0226	15.101	0.05748	1159	2134	1894	2591	1196	1848	2040	1495	64.77	62.37	36.97	32.4	90.76
PGAL8A_00105600	564	231	40.96	PF3D7_0109700	rRNA biogenesis protein RRP36, putative		0.015	0.0855	0.2116	0.0053	0.194	0.0373	0.0795	0.1829	0.1428	0.1559	0.0863	0.0811	0.1612	0.1715	0.1336	0.1475	0.2006	0.1304	0.1464	0.1943	0.2052	0.1362	0.1522	0.1759	0.1657	0.2004	0.19	0.0106	14.282	0.04724	3748	3281	2233	2261	2222	2735	3379	2267	83.21	83.4	45.51	52.74	83.92
PGAL8A_00105700	1632	1305	79.96	PF3D7_0109800	phenylalanine--tRNA ligase alpha subunit // phenylalanyl-tRNA synthetase alpha subunit		0.0365	0.0844	0.1919	0.0053	0.1875	0.0689	0.0869	0.1717	0.1272	0.1282	0.084	0.0844	0.1663	0.189	0.1244	0.1121	0.1652	0.1253	0.1217	0.1707	0.1957	0.1269	0.1233	0.1878	0.1896	0.2139	0.2178	0.0365	60.772	0.03678	2722	3305	2433	2261	2310	1451	3251	2421	82.41	78.21	70.47	56.34	56.47
PGAL8A_00105900	624	423	67.79	PF3D7_0110000	conserved Plasmodium protein, unknown function		0.073	0.2733	0.4952	0.0276	0.3922	0.1366	0.2712	0.353	0.267	0.2549	0.2889	0.3034	0.3281	0.3722	0.252	0.2449	0.4466	0.3777	0.386	0.4768	0.5144	0.3605	0.3663	0.4358	0.4483	0.4567	0.4674	0.0142	20.687	0.11144	1165	731	460	99	641	267	740	713	57.75	56.07	78.83	77.74	98.48
PGAL8A_00106000	2085	1041	49.93	PF3D7_0110100	selenocysteine-specific elongation factor selB homologue, putative		0.0514	0.1987	0.3746	0.0165	0.3126	0.1398	0.1977	0.2809	0.2101	0.2021	0.1882	0.192	0.2792	0.3102	0.1975	0.1902	0.3612	0.2567	0.2596	0.3566	0.3697	0.259	0.2619	0.3246	0.3159	0.3437	0.3338	0.0106	27.663	0.06284	2024	1426	939	490	1093	239	1443	1188	55.74	57.73	37.71	34.48	49.28
PGAL8A_00106100	417	288	69.06	PF3D7_0110200	FAD-linked sulfhydryl oxidase ERV1, putative	PfERV	0.0157	0.1364	0.2678	0.026	0.2569	0.0788	0.1509	0.2393	0.136	0.1735	0.1267	0.1413	0.2452	0.2543	0.117	0.1515	0.2454	0.1686	0.2	0.2693	0.2914	0.186	0.2191	0.2478	0.253	0.2853	0.2739	0.0418	25.712	0.0861	3711	2398	1691	123	1543	1153	2146	1607	50.96	57.12	57.11	33.38	76.99
PGAL8A_00106200	687	435	63.32	PF3D7_0110400	DNA-directed RNA polymerase II subunit RPB9, putative		0.0109	0.1127	0.179	0.0077	0.1281	0.036	0.1183	0.1457	0.1117	0.1122	0.1182	0.1237	0.1438	0.132	0.117	0.1178	0.1737	0.1149	0.1192	0.172	0.1768	0.1136	0.1162	0.1573	0.1772	0.1687	0.1891	0.0161	32.966	0.0151	3924	2789	2580	1669	3061	2811	2703	2751	76.41	83.97	80.86	71.06	72.43
PGAL8A_00106300	5196	1185	22.81	PF3D7_0110500	bromodomain protein, putative		0.0517	0.2061	0.4769	0.0088	0.4758	0.1415	0.2025	0.4484	0.3056	0.3425	0.204	0.195	0.4369	0.4723	0.307	0.33	0.4759	0.3308	0.3668	0.4788	0.4889	0.3265	0.356	0.533	0.5306	0.5609	0.5479	0.112	61.504	0.05946	2013	1334	500	1438	379	221	1380	370	57.26	78.71	52.03	44.04	64.22
PGAL8A_00106400	4332	1725	39.82	PF3D7_0110600	phosphatidylinositol-4-phosphate 5-kinase	PfPIP5K	0.0245	0.12	0.2437	0.0056	0.2319	0.0437	0.1166	0.2249	0.1909	0.1964	0.1277	0.1248	0.2326	0.2393	0.1967	0.2015	0.2277	0.205	0.2098	0.2256	0.2425	0.2055	0.2104	0.2678	0.2589	0.2788	0.2758	0.0505	71.47	0.02688	3297	2672	1913	2148	1818	2449	2729	1751	95.59	94.77	87.48	86	71.99
PGAL8A_00106500	1341	1194	89.04	PF3D7_0110700	chromatin assembly factor 1 protein WD40 domain, putative		0.0132	0.0605	0.1205	0.002	0.115	0.0424	0.0591	0.0959	0.0899	0.0948	0.0668	0.0655	0.0975	0.1162	0.0906	0.0955	0.0951	0.1049	0.1003	0.0972	0.122	0.1036	0.1003	0.1028	0.1024	0.1186	0.1253	0.01	391.98	0.01498	3828	3690	3239	3240	3220	2497	3719	3428	66.06	80.99	87.78	78.28	90.64
PGAL8A_00106600	1101	936	85.01	PF3D7_0110800	transcription initiation factor TFIIB, putative		0.0078	0.0409	0.0787	0.0001	0.0756	0.0235	0.0409	0.0674	0.0404	0.0464	0.0424	0.0424	0.0722	0.0811	0.0417	0.0463	0.0682	0.053	0.0549	0.0683	0.0788	0.0532	0.0552	0.0707	0.0769	0.0835	0.0899	0.0255	104.879	0.00478	4030	3941	3728	3612	3699	3407	3939	3767	88.51	90.17	85.46	80.84	77.13
PGAL8A_00106700	564	339	60.11	PF3D7_0110900	adenylate kinase-like protein 1		0.0373	0.1729	0.2954	0.0075	0.1705	0.0233	0.1747	0.1588	0.1973	0.197	0.1718	0.1774	0.1644	0.1734	0.2259	0.2219	0.2829	0.2425	0.2358	0.2839	0.2975	0.2494	0.2435	0.2672	0.2432	0.3109	0.2843	0.0182	53.322	0.03466	2674	1800	1476	1710	2525	3421	1776	2590	65.85	57.99	23.56	17.41	61.42
PGAL8A_00106800	4149	2364	56.98	PF3D7_0111000	kinesin-8, putative		0.0425	0.131	0.2602	0.0112	0.2333	0.0484	0.1296	0.2139	0.2586	0.2522	0.1348	0.1318	0.2136	0.2327	0.2541	0.2486	0.24	0.2755	0.2697	0.2367	0.2603	0.2754	0.2702	0.3162	0.3114	0.3216	0.315	0.0309	250.936	0.04002	2442	2468	1773	1007	1806	2234	2500	1892	31.83	24.87	62.59	75.94	26.8
PGAL8A_00106900	294	252	85.71	PF3D7_0111200	conserved Plasmodium protein, unknown function		0.0049	0.0378	0.2078	0	0.1923	0.0727	0.0379	0.1515	0.0558	0.0577	0.0382	0.0382	0.1505	0.1925	0.0505	0.0521	0.1535	0.0707	0.0732	0.1537	0.2076	0.0712	0.0737	0.1373	0.1542	0.1911	0.1798	0.0121	8.188	0.03568	4134	3980	2277	3943	2249	1334	3978	2675	3.83	15	25.41	39.86	70.49
PGAL8A_00107000	3204	1674	52.25	PF3D7_0111300	P-loop containing nucleoside triphosphate hydrolase, putative		0.061	0.1395	0.2417	0.009	0.2283	0.076	0.1391	0.2044	0.1795	0.1739	0.1302	0.1299	0.2049	0.2295	0.176	0.1651	0.2344	0.1939	0.1944	0.2365	0.2463	0.1904	0.19	0.2405	0.2426	0.2599	0.2631	0.0258	28.102	0.04064	1612	2356	1941	1400	1849	1230	2358	2005	23.39	37.53	56.98	55.62	30.14
PGAL8A_00107100	1632	837	51.29	PF3D7_0111400	conserved Plasmodium protein, unknown function // gametocyte exported protein 19	PfGEXP19	0.0234	0.1421	0.2135	0.0111	0.1307	0.0298	0.1442	0.1231	0.1552	0.1503	0.1494	0.1514	0.1276	0.132	0.155	0.1415	0.2009	0.2081	0.2032	0.1943	0.208	0.2168	0.2115	0.1821	0.1864	0.1841	0.1788	0.0237	46.977	0.0313	3341	2312	2211	1026	3022	3126	2270	3069	15.6	30.45	41.84	41.39	48.69
PGAL8A_00107200	1056	627	59.38	PF3D7_0111500	UMP-CMP kinase, putative		0.0411	0.0875	0.1265	0.0019	0.1456	0.0336	0.0857	0.1382	0.1636	0.1528	0.088	0.0862	0.1406	0.1369	0.1759	0.1652	0.1234	0.1602	0.1488	0.1263	0.1296	0.1608	0.1496	0.1838	0.1675	0.2037	0.1869	0.0241	58.142	0.04598	2503	3245	3164	3277	2811	2930	3278	2855	42.12	58.98	78.28	85.77	72.51
PGAL8A_00107300	708	240	33.9	PF3D7_0111600	conserved Plasmodium protein, unknown function		0.0551	0.2276	0.6757	0.0097	0.4659	0.1079	0.2057	0.37	0.2643	0.268	0.2045	0.1873	0.3536	0.4265	0.2559	0.2603	0.518	0.3984	0.3773	0.468	0.6026	0.3593	0.3455	0.3274	0.342	0.4582	0.4865	0.05	11.844	0.08884	1866	1103	162	1251	399	600	1335	632	4.78	54.42	34.53	40.77	71.3
PGAL8A_00107400	351	213	60.68	PF3D7_0111700	conserved Plasmodium protein, unknown function		0.0304	0.1304	0.2628	0.0114	0.2436	0.0353	0.1265	0.2087	0.129	0.1221	0.1455	0.1413	0.2237	0.2601	0.1466	0.1397	0.2161	0.229	0.2218	0.208	0.2524	0.2175	0.2101	0.2474	0.2415	0.2831	0.2782	0.0058	11.632	0.01792	3028	2479	1751	982	1686	2850	2559	1958	15.37	53.42	31.99	30.15	58.99
PGAL8A_00107500	1674	627	37.46	PF3D7_0111800	eukaryotic translation initiation factor 4E, putative		0.0577	0.2226	0.3013	0.0128	0.2162	0.0288	0.2271	0.2125	0.1865	0.1909	0.2166	0.2211	0.186	0.1895	0.1875	0.1916	0.2956	0.3198	0.3243	0.2958	0.3	0.3324	0.336	0.2528	0.2562	0.2522	0.2571	0.0172	34.997	0.1788	1737	1163	1424	811	1976	3171	1116	1909	50.53	73.48	61.02	44.18	30.98
PGAL8A_00107600	246	177	71.95	PF3D7_0111900	conserved protein, unknown function		0.0393	0.0757	0.118	0.0002	0.1068	0.0136	0.0753	0.116	0.1489	0.1426	0.0684	0.0685	0.1036	0.0872	0.1183	0.115	0.1143	0.1378	0.1315	0.1149	0.1159	0.1351	0.129	0.1797	0.1701	0.158	0.1501	0.0154	36.199	0.0172	2573	3433	3271	3573	3321	3833	3445	3178	61.45	78.67	84.13	67.65	87.19
PGAL8A_00107700	1365	969	70.99	PF3D7_0112000	TatD-like deoxyribonuclease		0.0533	0.1679	0.1703	0.0049	0.1368	0.0238	0.1693	0.124	0.1366	0.1389	0.1565	0.1597	0.1198	0.1288	0.1353	0.1401	0.1708	0.1609	0.1639	0.1739	0.1734	0.1648	0.1679	0.1504	0.1589	0.1558	0.1654	0.0215	45.896	0.08528	1948	1864	2669	2382	2930	3400	1854	3054	47.83	49.45	46.13	43.93	26.55
PGAL8A_00107800	474	117	24.68	PF3D7_0112100	conserved Plasmodium protein, unknown function		0.0648	0.1352	0.2209	0	0.1711	0.0508	0.1352	0.1334	0.3011	0.2728	0.1726	0.1726	0.1511	0.1646	0.3732	0.2823	0.1766	0.4612	0.3956	0.1766	0.2209	0.4612	0.3956	0.3824	0.3025	0.3401	0.2854	0.0541	2.257	0.18462	1462	2411	2143	3943	2517	2123	2411	2923	7.59	17.34	1.45	5.14	7.37
PGAL8A_00107900	663	561	84.62	PF3D7_0805400	acetyltransferase, putative		0.0707	0.2074	0.2422	0.0107	0.2141	0.0373	0.2099	0.1902	0.2386	0.2285	0.1828	0.191	0.1598	0.177	0.2034	0.1981	0.2118	0.2507	0.2475	0.2127	0.2432	0.248	0.2446	0.2116	0.2033	0.2457	0.2373	0.0088	19.708	0.15532	1237	1320	1932	1086	2007	2735	1299	2168	80.3	66.38	40.09	37.49	72.84
PGAL8A_00108000	3027	1986	65.61	PF3D7_0805500	conserved Plasmodium protein, unknown function		0.051	0.1277	0.279	0.0035	0.2575	0.0553	0.131	0.2382	0.2033	0.1997	0.1288	0.1303	0.2294	0.2454	0.1983	0.1909	0.2585	0.2249	0.2159	0.2638	0.2796	0.2247	0.2183	0.3154	0.3084	0.3283	0.3222	0.0153	34.823	0.1003	2044	2533	1594	2791	1540	1944	2481	1619	62.42	58.33	41.04	53.54	12.77
PGAL8A_00108200	3657	1905	52.09	PF3D7_0805700	serine/threonine protein kinase, FIKK family	TSTK0	0.0652	0.2004	0.2458	0.0049	0.2103	0.0665	0.2041	0.2095	0.2338	0.2345	0.1822	0.1855	0.2073	0.2067	0.2327	0.2334	0.2405	0.2683	0.2675	0.2429	0.2472	0.2722	0.2672	0.242	0.2461	0.2467	0.2511	0.0285	124.031	0.0467	1440	1404	1896	2382	2052	1528	1359	1945	24.03	25.58	64.34	74.36	32.02
PGAL8A_00108300	2154	624	28.97	PF3D7_0805800	conserved Plasmodium protein, unknown function		0.0779	0.3392	0.4649	0.0113	0.3205	0.0602	0.3395	0.3204	0.2211	0.2116	0.3756	0.3745	0.2891	0.2832	0.2187	0.216	0.4495	0.3456	0.3568	0.4698	0.5056	0.355	0.3601	0.3672	0.3534	0.3567	0.3444	0.0323	88.653	0.1187	1020	397	533	995	1038	1753	397	904	6.82	3.44	6.13	5.14	47.07
PGAL8A_00108400	720	327	45.42	PF3D7_0805900	conserved protein, unknown function		0.0352	0.0762	0.1573	0.0044	0.1845	0.0499	0.0772	0.1791	0.1226	0.1273	0.07	0.0711	0.2102	0.1916	0.1274	0.1375	0.1623	0.0936	0.1155	0.1563	0.1645	0.0886	0.1103	0.1863	0.188	0.1951	0.1968	0.0164	98.746	0.07118	2785	3423	2830	2528	2345	2161	3416	2318	43.78	52.4	36.15	25.14	75.64
PGAL8A_00108500	3405	1314	38.59	PF3D7_0806000	AAA family ATPase, putative		0.0703	0.2464	0.5989	0.0091	0.5559	0.1292	0.2401	0.4741	0.2547	0.2636	0.2551	0.2469	0.4512	0.5523	0.2563	0.2613	0.5375	0.3273	0.314	0.5336	0.5949	0.323	0.3105	0.4919	0.4774	0.5564	0.5334	0.05	10.066	0.09534	1249	923	255	1374	230	326	981	307	55.67	56.92	35.76	30.5	17.55
PGAL8A_00108600	1644	315	19.16	PF3D7_0806100	conserved Plasmodium protein, unknown function		0.128	0.3507	0.6687	0.0184	0.7959	0.2613	0.3343	0.7389	0.3493	0.3819	0.3147	0.2937	0.6107	0.6995	0.3249	0.3565	0.5637	0.364	0.3994	0.5489	0.6385	0.3505	0.3856	0.601	0.6216	0.6571	0.6856	0.0468	9.474	0.097	236	365	170	366	57	10	414	55	43.59	58.32	38.9	42.49	42.58
PGAL8A_00108700	2955	1701	57.56	PF3D7_0806200	C-mannosyltransferase, putative		0.0545	0.1809	0.3125	0.0129	0.3259	0.0912	0.1805	0.2964	0.2359	0.2402	0.1809	0.1826	0.2889	0.3158	0.2254	0.2308	0.2925	0.2433	0.2413	0.2902	0.3048	0.2395	0.2367	0.3008	0.3094	0.3193	0.3287	0.0309	15.475	0.06484	1898	1684	1334	799	1000	861	1681	1071	11.22	12.39	55.25	71.98	60.08
PGAL8A_00108800	4722	3930	83.23	PF3D7_0806300	ferlin, putative		0.0116	0.0551	0.1125	0.003	0.0899	0.0349	0.0559	0.0846	0.0703	0.0708	0.0543	0.0548	0.0831	0.0891	0.0725	0.0728	0.0963	0.0841	0.0832	0.0976	0.1141	0.0852	0.0844	0.1017	0.1007	0.1103	0.1106	0.0054	51.472	0.01562	3896	3770	3350	2943	3518	2866	3766	3563	32.04	12.17	66.19	80.64	52.54
PGAL8A_00108900	510	405	79.41	PF3D7_0806400	glycosyltransferase family 28 protein, putative		0.063	0.1694	0.3477	0.0087	0.3715	0.1066	0.1666	0.3923	0.2263	0.2107	0.1769	0.1694	0.3477	0.3367	0.2099	0.1964	0.3606	0.2336	0.2181	0.3517	0.3541	0.2315	0.2161	0.3563	0.3234	0.3809	0.3481	0.0156	16.489	0.08286	1526	1847	1090	1461	739	620	1897	539	30.08	16.39	46.3	53.3	82.52
PGAL8A_00109000	1695	954	56.28	PF3D7_0806500	DnaJ protein, putative		0.0215	0.0812	0.2592	0.0114	0.2551	0.0537	0.0824	0.2372	0.3035	0.3307	0.086	0.0889	0.2394	0.2555	0.3226	0.3439	0.24	0.3224	0.3356	0.2366	0.2561	0.3249	0.3416	0.3012	0.3139	0.3091	0.3068	0.0309	101.127	0.02504	3436	3356	1782	982	1566	2008	3335	1633	78.6	85.48	83.83	85.88	73.13
PGAL8A_00109100	2649	1164	43.94	PF3D7_0806600	kinesin-like protein, putative		0.0514	0.1286	0.3072	0.0041	0.31	0.1157	0.1304	0.277	0.1669	0.174	0.144	0.1445	0.2769	0.3047	0.1835	0.1844	0.2787	0.1833	0.1833	0.2813	0.3081	0.1838	0.1821	0.2977	0.2896	0.3055	0.2982	0.0236	6.72	0.0492	2024	2512	1365	2624	1109	486	2488	1224	67.89	35.23	36.89	21.34	17.15
PGAL8A_00109200	6387	1953	30.58	PF3D7_0806700	conserved Plasmodium membrane protein, unknown function		0.0904	0.3179	0.6173	0.0193	0.544	0.1103	0.3206	0.441	0.3294	0.3404	0.3244	0.3249	0.4465	0.5197	0.3309	0.3319	0.5507	0.4011	0.4046	0.5642	0.6113	0.3995	0.4011	0.5082	0.5067	0.5409	0.5631	0.0632	25.677	0.13296	707	477	230	326	256	563	464	388	66.02	49.8	44.57	49.73	36.58
PGAL8A_00109400	2721	2061	75.74	PF3D7_0806800	V-type proton ATPase subunit a, putative		0.0157	0.0795	0.0845	0.0011	0.104	0.0211	0.0805	0.103	0.0818	0.0826	0.0785	0.0795	0.1028	0.1058	0.0823	0.084	0.0804	0.0756	0.0769	0.079	0.0832	0.076	0.0774	0.0861	0.0884	0.0925	0.0946	0.0074	71.457	0.00576	3711	3371	3671	3476	3355	3516	3363	3331	94.2	92.26	90.91	91.36	65.76
PGAL8A_00109500	1056	636	60.23	PF3D7_0806900	conserved Plasmodium protein, unknown function		0.0731	0.1609	0.2284	0.0074	0.242	0.0762	0.1588	0.2131	0.1469	0.1363	0.1778	0.1765	0.2064	0.2457	0.1493	0.1417	0.2173	0.1888	0.1839	0.2255	0.2353	0.1849	0.1816	0.1803	0.1868	0.2125	0.2173	0.0187	13.878	0.0461	1159	1980	2066	1732	1712	1226	2025	1899	46.1	51.45	43.85	40.38	37.65
PGAL8A_00109600	666	657	98.65	PF3D7_0807000	YEATS domain-containing protein, putative		0.0198	0.0952	0.1343	0.0018	0.1064	0.0319	0.0945	0.1018	0.0824	0.0779	0.0862	0.0856	0.0936	0.0995	0.0838	0.0789	0.109	0.1025	0.095	0.1082	0.1335	0.102	0.0946	0.088	0.0851	0.0821	0.0789	0.0126	22.82	0.02428	3532	3105	3075	3312	3327	3024	3116	3343	85.32	81.82	78.45	72.63	93.92
PGAL8A_00109700	4125	1173	28.44	PF3D7_0807100	ATP-dependent RNA helicase DHH1, putative		0.0661	0.2566	0.442	0.0253	0.4106	0.1201	0.2521	0.3404	0.2563	0.2485	0.2478	0.2415	0.3473	0.4054	0.2483	0.2347	0.3697	0.3181	0.3148	0.3479	0.4227	0.3102	0.3068	0.3519	0.3505	0.4007	0.4083	0.0484	28.207	0.07576	1402	847	620	134	555	427	878	781	56.29	67.2	47.05	52.71	56.72
PGAL8A_00109800	966	417	43.17	PF3D7_0816900	adenylate kinase 2		0.1168	0.2306	0.3786	0.0283	0.3481	0.091	0.2395	0.2785	0.236	0.2278	0.2637	0.2629	0.308	0.3776	0.2261	0.2258	0.3375	0.257	0.2461	0.3568	0.3985	0.2516	0.2579	0.3174	0.2985	0.3683	0.3433	0.0258	94.487	0.14788	338	1070	920	89	858	868	987	1211	15.96	10.62	4.79	5.14	34.9
PGAL8A_00109900	1149	786	68.41	PF3D7_0817000	NEDD8-activating enzyme E1 catalytic subunit, putative		0.1079	0.2391	0.5667	0.0088	0.5246	0.1373	0.2471	0.4349	0.2747	0.271	0.2909	0.2965	0.4325	0.5349	0.2945	0.2995	0.5008	0.2962	0.2835	0.5178	0.5841	0.3022	0.2895	0.4596	0.4541	0.5712	0.5331	0.0342	8.75	0.14434	429	995	303	1438	284	257	915	414	7.56	11.27	17.34	17.04	20.03
PGAL8A_00110000	2127	849	39.92	PF3D7_0817100	tRNA modification GTPase, putative		0.0576	0.1656	0.3946	0.0143	0.3869	0.1302	0.1663	0.3419	0.2105	0.195	0.1686	0.1689	0.3391	0.3568	0.2083	0.194	0.3692	0.2191	0.2147	0.3806	0.4039	0.2256	0.2256	0.3596	0.3515	0.3824	0.3793	0.0656	43.315	0.0745	1744	1894	830	671	668	318	1905	772	32.61	48.24	23.99	15.05	14.79
PGAL8A_00110100	2037	729	35.79	PF3D7_0817200	conserved Plasmodium protein, unknown function		0.1838	0.3721	0.6768	0.0161	0.7189	0.2254	0.3765	0.5708	0.5749	0.6306	0.3418	0.3456	0.5964	0.6831	0.6006	0.6155	0.5518	0.5653	0.5925	0.5744	0.6988	0.5896	0.6141	0.7218	0.7827	0.8432	0.88	0.1413	47.739	0.11072	77	298	161	518	85	24	285	159	53.59	46.08	48.24	59.13	35.1
PGAL8A_00110200	5763	582	10.1	PF3D7_0817300	conserved Plasmodium protein, unknown function // asparagine-rich antigen		0.0421	0.2348	0.8742	0.014	0.8538	0.2691	0.2286	0.7514	0.3386	0.4166	0.2406	0.2343	0.7507	0.8907	0.3465	0.4249	0.8493	0.4043	0.4653	0.8421	0.9086	0.3774	0.4406	0.8117	0.872	0.8623	0.8721	0.1281	68.878	0.11996	2457	1039	50	700	39	7	1092	50	60.84	91.85	86.57	61.26	38.27
PGAL8A_00110300	1437	660	45.93	PF3D7_0817400	phosphatase, putative		0.0397	0.296	0.6141	0.0177	0.5594	0.1834	0.2967	0.4358	0.2471	0.2439	0.2979	0.2949	0.4693	0.58	0.2377	0.2344	0.5659	0.383	0.3514	0.5679	0.6266	0.3874	0.3559	0.487	0.4976	0.5388	0.5575	0.0286	3.509	0.082	2558	585	232	399	224	69	575	409	13.23	28.42	35.4	36.94	32.39
PGAL8A_00110400	555	495	89.19	PF3D7_0817500	protein kinase c inhibitor-like protein, putative		0.0383	0.1343	0.15	0.0075	0.1287	0.0522	0.131	0.1416	0.1307	0.1238	0.1234	0.1201	0.1461	0.1202	0.1244	0.1208	0.148	0.1375	0.1335	0.1593	0.1528	0.1473	0.1439	0.1163	0.1157	0.112	0.1152	0.005	75.164	0.06192	2619	2424	2904	1710	3054	2066	2481	2816	96.47	94.11	97.89	97.2	98.3
PGAL8A_00110500	2928	798	27.25	PF3D7_0817600	conserved Plasmodium protein, unknown function		0.0692	0.2169	0.3624	0.0119	0.3694	0.1742	0.2199	0.2823	0.283	0.2743	0.2219	0.2263	0.314	0.3901	0.2911	0.2831	0.3449	0.3056	0.3082	0.3446	0.3617	0.3016	0.3039	0.3606	0.34	0.3833	0.3834	0.036	28.502	0.09868	1279	1218	1011	918	752	91	1193	1175	49.51	20.91	84.49	92.16	40.12
PGAL8A_00110700	3459	2661	76.93	PF3D7_0817700	rhoptry neck protein 5	PfRON5	0.1094	0.1918	0.1897	0.0121	0.2162	0.0284	0.1935	0.2118	0.283	0.2702	0.209	0.2091	0.2404	0.2374	0.2917	0.2812	0.1898	0.2711	0.2633	0.192	0.1912	0.2707	0.2623	0.301	0.2896	0.3027	0.2935	0.0331	188.201	0.0592	411	1515	2452	889	1976	3191	1491	1916	45.14	22.14	91	97.14	78.55
PGAL8A_00110800	162	150	92.59	PF3D7_0817800	conserved Plasmodium protein, unknown function		0.0321	0.3077	0.1922	0.0001	0.3475	0.0651	0.3033	0.3354	0.3396	0.3514	0.2884	0.2848	0.3291	0.3393	0.3257	0.3314	0.1524	0.1624	0.1746	0.1528	0.1929	0.1608	0.1726	0.1183	0.1308	0.19	0.2047	0.008	76.042	0.07106	2943	522	2429	3612	865	1569	544	812	55.17	43.9	89.11	91.57	98.32
PGAL8A_00110900	300	216	72	PF3D7_0817900	high mobility group protein B2	PfHMGB2	0.0056	0.0228	0.044	0	0.0501	0.0257	0.0227	0.0499	0.0628	0.0622	0.0167	0.0168	0.0435	0.0431	0.0577	0.057	0.0569	0.039	0.0382	0.0569	0.044	0.0389	0.0381	0.0764	0.076	0.0486	0.0482	0.0011	2079.58	0.01976	4110	4126	4007	3943	3942	3310	4128	3953	92.04	92.47	98.27	98.96	99.39
PGAL8A_00111000	1377	261	18.95	PF3D7_0818000	U4/U6.U5 small nuclear ribonucleoprotein, putative		0.1132	0.3302	0.4424	0.0001	0.5228	0.0819	0.3299	0.57	0.5023	0.4914	0.3124	0.3116	0.6027	0.5226	0.544	0.5271	0.4838	0.4201	0.4404	0.4828	0.4417	0.4187	0.4396	0.3781	0.3578	0.4144	0.392	0.0285	163.945	0.04338	366	425	616	3612	289	1070	426	161	96.45	93.79	96.05	97.7	75.97
PGAL8A_00111100	1539	1080	70.18	PF3D7_0818100	zinc finger protein, putative		0.0342	0.1525	0.2476	0.0097	0.2226	0.1134	0.1603	0.2208	0.2441	0.2267	0.1486	0.1561	0.227	0.2084	0.2442	0.2242	0.2383	0.2237	0.23	0.2449	0.2548	0.2215	0.2272	0.2844	0.2995	0.3103	0.3172	0.0438	32.376	0.06716	2847	2132	1880	1251	1911	520	1996	1813	52.57	20.24	72.53	86.1	46.34
PGAL8A_00111200	789	750	95.06	PF3D7_0818200	14-3-3 protein	Pf14-3-3I	0.0004	0.0048	0.0049	0	0.0078	0.0004	0.0048	0.0087	0.0077	0.0077	0.0049	0.0048	0.009	0.008	0.0077	0.0077	0.0071	0.0066	0.0066	0.0071	0.0063	0.0065	0.0065	0.0075	0.0074	0.0069	0.0057	0.0001	5438.74	0.001	4268	4266	4271	3943	4261	4240	4265	4256	98.32	98.39	99.55	99.52	98.55
PGAL8A_00111300	1671	945	56.55	PF3D7_0818300	dynactin subunit 6, putative		0.0937	0.5364	0.8742	0.0169	0.597	0.1713	0.5117	0.5618	0.4266	0.459	0.5354	0.5061	0.5586	0.5578	0.4294	0.4571	0.8108	0.6858	0.7185	0.7802	0.8258	0.6501	0.6891	0.6665	0.6784	0.6649	0.6829	0.0337	1.732	0.17824	628	72	50	453	182	97	89	173	43.52	19.65	10.09	17.41	37.49
PGAL8A_00111400	582	465	79.9	PF3D7_0818400	rRNA-processing protein FCF1, putative		0.0167	0.0337	0.0576	0.0025	0.0394	0.006	0.0367	0.044	0.0181	0.0178	0.0478	0.0511	0.048	0.0443	0.029	0.0294	0.0505	0.0285	0.0282	0.053	0.0598	0.0311	0.0308	0.0233	0.0229	0.0293	0.0288	0.0003	62.675	0.0126	3670	4026	3900	3104	4047	4089	3990	4001	79.45	72.1	51.08	28.39	85.39
PGAL8A_00111500	489	327	66.87	PF3D7_0818500	zinc finger protein, putative		0.0206	0.0734	0.0914	0.0033	0.0957	0.0154	0.0776	0.1037	0.1278	0.122	0.0616	0.0657	0.0982	0.0889	0.1178	0.1127	0.1026	0.1181	0.1126	0.098	0.0868	0.1224	0.1169	0.1446	0.1388	0.142	0.1359	0.004	201.375	0.0126	3490	3475	3597	2843	3457	3763	3409	3321	94.65	91.34	90.65	97.16	92.75
PGAL8A_00111600	825	696	84.36	PF3D7_0818600	BEM46-like protein, putative		0.1804	0.353	0.3629	0.0158	0.3895	0.0707	0.3489	0.3734	0.3874	0.4005	0.3547	0.3399	0.3853	0.4282	0.4419	0.4291	0.3563	0.3225	0.3316	0.3482	0.3522	0.3082	0.3175	0.3531	0.3621	0.3259	0.3476	0.0459	9.012	0.11632	83	357	1007	537	659	1390	364	612	71.14	39.02	76.35	83.61	75.58
PGAL8A_00111700	2817	1827	64.86	PF3D7_0818700	DNA helicase, putative		0.0094	0.0825	0.1042	0.0034	0.0599	0.0406	0.0817	0.066	0.0902	0.0959	0.0839	0.0846	0.0633	0.0568	0.0865	0.096	0.1066	0.1174	0.1209	0.1052	0.1051	0.1157	0.1203	0.1117	0.1198	0.1167	0.1263	0.0188	126.885	0.01472	3967	3338	3448	2816	3846	2575	3343	3783	91.69	78.19	86.07	83.37	68.11
PGAL8A_00111800	1014	717	70.71	PF3D7_0818800	U3 small nucleolar ribonucleoprotein protein IMP4, putative		0.0243	0.0643	0.0818	0.0016	0.063	0.0148	0.0666	0.0626	0.0462	0.04	0.0654	0.0674	0.0725	0.0762	0.0586	0.0543	0.091	0.0882	0.0815	0.0937	0.0846	0.0904	0.0838	0.0782	0.0734	0.0911	0.0836	0.0081	19.914	0.01456	3306	3637	3701	3361	3813	3790	3605	3813	74.95	63.08	27.75	27.23	41.71
PGAL8A_00112000	4323	1716	39.69	PF3D7_0819000	conserved Plasmodium protein, unknown function		0.0617	0.1942	0.3415	0.0135	0.2773	0.083	0.1977	0.2685	0.2597	0.2598	0.1945	0.2014	0.2714	0.2808	0.2591	0.2673	0.3209	0.2992	0.3035	0.33	0.3478	0.294	0.3017	0.3481	0.3575	0.3549	0.3688	0.053	63.56	0.0993	1575	1485	1125	748	1359	1041	1443	1311	82.36	77.5	48.57	30.57	39.25
PGAL8A_00112100	864	567	65.63	PF3D7_0819100	BRIX domain, putative		0.0323	0.1057	0.2676	0.0021	0.2329	0.0335	0.1025	0.239	0.2189	0.2133	0.1069	0.1036	0.2341	0.2531	0.2182	0.2081	0.289	0.2203	0.2139	0.2843	0.263	0.2168	0.2103	0.3538	0.335	0.3628	0.3443	0.044	57.25	0.05992	2935	2901	1693	3213	1809	2936	2963	1610	82.86	65.92	31.87	19.37	67.18
PGAL8A_00112200	1890	1365	72.22	PF3D7_0819200	perforin-like protein 5	PPLP5	0.0829	0.2562	0.2975	0.0156	0.2661	0.0767	0.257	0.2632	0.2686	0.2687	0.2462	0.2482	0.2412	0.2419	0.2703	0.272	0.2907	0.3309	0.3118	0.2914	0.299	0.3316	0.3134	0.2827	0.2814	0.3118	0.3221	0.0272	5.969	0.13396	885	851	1457	557	1453	1210	843	1358	41.22	33.3	10.91	5.14	9.16
PGAL8A_00112300	2922	1605	54.93	PF3D7_0819300	conserved Plasmodium protein, unknown function		0.0818	0.3639	0.597	0.0131	0.5246	0.1116	0.3722	0.4776	0.3741	0.3732	0.3329	0.345	0.508	0.5401	0.3843	0.3737	0.6031	0.4245	0.4407	0.593	0.6009	0.4368	0.4486	0.5405	0.5972	0.5512	0.5909	0.0425	9.366	0.13146	914	317	260	781	284	542	300	298	7.87	30.69	15.99	15.27	19.59
PGAL8A_00112400	1896	1470	77.53	PF3D7_0819400	perforin-like protein 4	PPLP4	0.0603	0.2296	0.3381	0.0102	0.3107	0.0954	0.2289	0.2965	0.2409	0.2555	0.2389	0.2397	0.3196	0.3182	0.2681	0.2742	0.3336	0.2813	0.2858	0.3343	0.334	0.2843	0.29	0.3268	0.331	0.367	0.3667	0.0292	3.676	0.1132	1644	1083	1150	1159	1105	780	1088	1070	13.57	12.45	11.94	11.58	9.05
PGAL8A_00112500	1158	852	73.58	PF3D7_0819500	conserved protein, unknown function		0.0201	0.0567	0.1007	0.0013	0.0764	0.0174	0.0551	0.0753	0.0974	0.1023	0.0474	0.0459	0.0708	0.0734	0.0977	0.1068	0.0988	0.1313	0.1349	0.0973	0.0991	0.1294	0.133	0.1097	0.1158	0.1121	0.1198	0.0132	38.806	0.02618	3516	3748	3486	3426	3689	3662	3774	3687	40.94	80.13	51.45	38.69	70.47
PGAL8A_00112600	699	477	68.24	PF3D7_0819600	conserved Plasmodium protein, unknown function		0.0547	0.0862	0.0685	0.0052	0.0995	0.0204	0.0922	0.1011	0.1298	0.1288	0.0975	0.1029	0.1078	0.1089	0.1398	0.1366	0.0611	0.1116	0.1259	0.0669	0.0671	0.1069	0.1249	0.1381	0.1374	0.1395	0.1391	0.033	121.238	0.0314	1883	3264	3795	2292	3412	3551	3157	3352	67.91	79.02	86.08	92.26	65.88
PGAL8A_00112700	1569	543	34.61	PF3D7_0819700	conserved Plasmodium protein, unknown function		0.1959	0.3555	0.6185	0.0152	0.6226	0.1806	0.3645	0.4789	0.398	0.3885	0.3312	0.3304	0.5142	0.6629	0.426	0.4009	0.579	0.4124	0.3903	0.5502	0.6004	0.41	0.3886	0.5707	0.5386	0.7365	0.7198	0.0291	23.93	0.15236	60	348	227	588	155	75	322	294	7.18	13.9	25.81	39.9	22.75
PGAL8A_00112800	3726	1794	48.15	PF3D7_0819800	conserved Plasmodium protein, unknown function		0.0763	0.2417	0.409	0.0164	0.3304	0.0802	0.2348	0.3029	0.2859	0.2833	0.2483	0.2434	0.3036	0.3185	0.2818	0.2808	0.3756	0.3589	0.348	0.3681	0.3974	0.3512	0.3417	0.4075	0.3975	0.4114	0.4008	0.0364	13.047	0.13996	1070	967	762	496	969	1114	1035	1024	23.26	9.02	18.75	32.44	35.81
PGAL8A_00112900	276	267	96.74	PF3D7_0819900	U6 snRNA-associated Sm-like protein LSm3, putative		0.023	0.0408	0.056	0.0045	0.0871	0.0165	0.0458	0.0782	0.1074	0.1133	0.0481	0.0527	0.0644	0.0729	0.0823	0.0874	0.0478	0.0993	0.0937	0.053	0.0611	0.1043	0.0979	0.0962	0.089	0.1022	0.096	0.0047	62.362	0.03148	3360	3943	3915	2491	3563	3704	3884	3654	68.86	65.14	37.34	46.58	77.24
PGAL8A_00113000	5286	2697	51.02	PF3D7_0820000	Snf2-related CBP activator, putative // helicase SRCAP, putative	PfSRCAP	0.0314	0.1038	0.1457	0.0044	0.1345	0.0511	0.1034	0.1286	0.094	0.0956	0.0993	0.0993	0.1279	0.1326	0.1008	0.0992	0.1384	0.1133	0.112	0.1382	0.1451	0.1122	0.1115	0.139	0.1346	0.1414	0.1404	0.0151	146.15	0.02486	2971	2939	2962	2528	2961	2103	2948	2996	71.91	81.43	60.5	40.23	39.17
PGAL8A_00113100	1029	432	41.98	PF3D7_0820100	RNA-binding protein, putative		0.0784	0.099	0.1827	0.0054	0.2195	0.0519	0.1022	0.1929	0.1467	0.1466	0.1342	0.1337	0.1976	0.206	0.1749	0.1736	0.1816	0.1474	0.1419	0.1879	0.1841	0.1518	0.1461	0.1717	0.1845	0.1994	0.2098	0.0151	25.663	0.0746	997	3037	2534	2202	1943	2077	2973	2136	29.7	38.9	28.34	38.24	36.26
PGAL8A_00113200	1905	1308	68.66	PF3D7_0820200	phosphatidylglycerophosphate synthase	PfPGPS	0.0554	0.1626	0.2488	0.0057	0.1919	0.0571	0.1557	0.1877	0.1993	0.2087	0.1495	0.143	0.177	0.1895	0.2115	0.2173	0.2352	0.2512	0.2427	0.2347	0.2474	0.2478	0.2401	0.2547	0.2498	0.2686	0.2725	0.0236	43.825	0.05748	1856	1959	1863	2121	2257	1865	2079	2196	62.68	58.42	55.15	58.92	14.47
PGAL8A_00113300	1299	372	28.64	PF3D7_0820300	conserved Plasmodium protein, unknown function		0.1716	0.3039	0.4377	0.0033	0.4505	0.0943	0.2957	0.4656	0.4564	0.4591	0.3296	0.3209	0.5011	0.4931	0.4328	0.4124	0.4138	0.3715	0.3866	0.414	0.4379	0.3778	0.3933	0.4649	0.4596	0.4851	0.4983	0.0325	42.79	0.06604	95	544	640	2843	440	803	582	323	91.26	82.76	75.23	81.76	63.56
PGAL8A_00113400	1377	792	57.52	PF3D7_0820400	conserved Plasmodium protein, unknown function		0.0985	0.4014	0.6919	0.0277	0.5442	0.1267	0.4086	0.5655	0.3738	0.3607	0.4412	0.4516	0.5794	0.5856	0.385	0.3666	0.7366	0.5096	0.4948	0.7293	0.7001	0.5245	0.5054	0.6312	0.6433	0.6404	0.6469	0.0285	19.852	0.09804	546	231	149	97	255	354	219	167	50.03	26.12	17.31	18.31	55.91
PGAL8A_00113500	1959	729	37.21	PF3D7_0820500	protein transport protein YIF1, putative		0.0385	0.1456	0.2187	0.0086	0.2423	0.0523	0.1396	0.2153	0.1907	0.1981	0.1304	0.1295	0.205	0.2386	0.1807	0.1877	0.2035	0.1643	0.1805	0.2112	0.2245	0.1635	0.1793	0.1971	0.2207	0.2187	0.2476	0.0364	14.621	0.03804	2608	2234	2168	1492	1708	2062	2347	1877	81.74	61.24	61.8	57.45	27.26
PGAL8A_00113600	1374	912	66.38	PF3D7_0820600	conserved Plasmodium membrane protein, unknown function		0.0613	0.1459	0.1602	0.0052	0.1702	0.0327	0.1472	0.1636	0.1566	0.1593	0.1364	0.1421	0.1557	0.1606	0.1597	0.1644	0.151	0.1918	0.1863	0.1513	0.1551	0.19	0.1846	0.192	0.1958	0.1932	0.2	0.0236	22.472	0.0378	1592	2228	2797	2292	2531	2982	2214	2533	14.33	7.53	31.63	45.7	65.24
PGAL8A_00113700	3111	2826	90.84	PF3D7_0820700	2-oxoglutarate dehydrogenase E1 component		0.0341	0.0723	0.1071	0.0049	0.1034	0.0297	0.0731	0.0953	0.0912	0.093	0.0739	0.0753	0.0941	0.107	0.0918	0.0911	0.0934	0.0892	0.088	0.0931	0.1068	0.0887	0.0874	0.1117	0.1116	0.1273	0.1286	0.0054	83.873	0.01658	2850	3495	3410	2382	3367	3134	3489	3435	38.29	35.81	85.7	80.23	49.89
PGAL8A_00113800	2304	1230	53.39	PF3D7_0820800	conserved Plasmodium protein, unknown function		0.0719	0.1862	0.4259	0.0105	0.3648	0.14	0.1903	0.2743	0.2254	0.2347	0.2179	0.221	0.2957	0.3849	0.2423	0.254	0.3521	0.2547	0.2754	0.3583	0.4322	0.2535	0.2744	0.3658	0.3673	0.4621	0.4441	0.0584	8.802	0.05208	1195	1600	684	1118	772	237	1541	1259	25.79	21.94	31.04	28.08	9.45
PGAL8A_00114100	1545	1188	76.89	PF3D7_0821000	conserved Plasmodium protein, unknown function		0.0275	0.0667	0.1006	0.001	0.113	0.0272	0.068	0.0989	0.0898	0.0938	0.0722	0.0735	0.1062	0.1188	0.0901	0.0956	0.0846	0.0812	0.0804	0.0849	0.1009	0.0823	0.0817	0.0954	0.0939	0.1051	0.1031	0.0074	38.675	0.01336	3151	3600	3488	3496	3245	3246	3580	3388	6.11	43.28	83.28	86.41	49.01
PGAL8A_00114200	2820	1269	45	PF3D7_0821100	protein kinase 1	PfPK1	0.0328	0.1124	0.1563	0.0096	0.1486	0.0606	0.1109	0.1522	0.1258	0.1228	0.1056	0.1076	0.1484	0.1402	0.1264	0.1256	0.1613	0.1369	0.1382	0.1677	0.1635	0.1384	0.1391	0.1711	0.1736	0.1695	0.1746	0.0233	42.886	0.03662	2905	2797	2842	1279	2774	1729	2825	2668	74.23	54.44	61.05	60.43	30.47
PGAL8A_00114400	603	399	66.17	PF3D7_0821200	conserved Plasmodium protein, unknown function		0.0213	0.1076	0.3177	0.0059	0.3328	0.0962	0.1008	0.2918	0.1229	0.1249	0.098	0.0915	0.2978	0.3245	0.1167	0.11	0.3044	0.1139	0.122	0.3052	0.3034	0.1069	0.1145	0.3065	0.3107	0.3442	0.343	0.0244	131.825	0.0305	3448	2869	1283	2068	951	761	3005	1091	67.75	56.93	53.35	49.52	73.7
PGAL8A_00114500	2442	1536	62.9	PF3D7_0821300	ATP-dependent RNA helicase DHX36, putative		0.0283	0.0651	0.1307	0.0031	0.1355	0.0462	0.0669	0.1224	0.1194	0.1216	0.0535	0.056	0.1121	0.1236	0.1129	0.1155	0.1211	0.1224	0.1222	0.1178	0.128	0.1254	0.1252	0.17	0.1648	0.1828	0.1849	0.016	25.793	0.0235	3113	3621	3118	2910	2946	2328	3599	3080	73.76	77.15	41.82	32.16	27.18
PGAL8A_00114600	684	582	85.09	PF3D7_0821500	ribosomal RNA small subunit methyltransferase NEP1, putative		0.0336	0.1807	0.2363	0.008	0.1976	0.054	0.1738	0.2014	0.1141	0.1158	0.1778	0.1785	0.1909	0.1954	0.1123	0.1148	0.2435	0.141	0.1443	0.2262	0.2253	0.1425	0.1483	0.2051	0.2065	0.1886	0.1957	0.0178	10.328	0.05288	2866	1686	1996	1601	2190	1991	1795	2035	71.4	64.93	20.65	5.14	55.41
PGAL8A_00114700	1608	1134	70.52	PF3D7_0821600	polyribonucleotide 5'-hydroxyl-kinase Clp1, putative		0.0174	0.113	0.1611	0.0063	0.1536	0.0308	0.1155	0.1376	0.1324	0.1208	0.1124	0.1145	0.1395	0.1569	0.1375	0.1251	0.16	0.1671	0.1531	0.1634	0.1628	0.1646	0.153	0.1916	0.1807	0.1936	0.1888	0.0222	21.975	0.02306	3633	2783	2781	1967	2727	3075	2748	2862	75.32	71.11	52.52	38.46	37.93
PGAL8A_00114800	414	252	60.87	PF3D7_0821700	60S ribosomal protein L22, putative		0.0052	0.0179	0.0259	0	0.0064	0.0005	0.0178	0.0074	0.021	0.0281	0.0189	0.0189	0.0161	0.0148	0.0247	0.035	0.0279	0.0238	0.0298	0.0201	0.026	0.0238	0.0299	0.015	0.0426	0.0158	0.0406	0.0162	118.814	0.00338	4121	4173	4147	3943	4268	4230	4173	4262	88.89	94.93	90.12	81.32	87.88
PGAL8A_00114900	237	153	64.56	PF3D7_0821800	protein transport protein SEC61 subunit beta, putative	Sec61-beta	0.001	0.0418	0.0356	0.0086	0.0269	0.0103	0.0332	0.0342	0.0715	0.085	0.042	0.0333	0.0343	0.027	0.0719	0.0844	0.043	0.0639	0.0769	0.0344	0.0283	0.0546	0.0672	0.0747	0.086	0.066	0.0778	0.0087	62.002	0.02864	4241	3929	4068	1492	4138	3948	4028	4085	99.22	98.13	98.6	99.15	99.01
PGAL8A_00115000	324	270	83.33	PF3D7_0821900	conserved Plasmodium protein, unknown function		0.0128	0.0574	0.1046	0.0001	0.0887	0.005	0.0575	0.0811	0.0532	0.0583	0.0534	0.0534	0.0742	0.0818	0.0391	0.044	0.0966	0.083	0.0785	0.0967	0.1045	0.0832	0.0786	0.0903	0.0854	0.0986	0.0935	0.0047	17.335	0.01556	3845	3738	3442	3612	3538	4126	3742	3615	53.9	57.43	69.27	61.07	93.3
PGAL8A_00115100	1884	1059	56.21	PF3D7_0822000	mitochondrial ribosomal protein L4 precursor, putative		0.0158	0.0459	0.0812	0.0002	0.1027	0.0299	0.0458	0.0917	0.0641	0.06	0.0377	0.0378	0.0877	0.0972	0.0562	0.052	0.0676	0.0483	0.0458	0.0675	0.0811	0.0482	0.0457	0.083	0.0812	0.0993	0.0958	0.0034	55.086	0.02018	3707	3884	3706	3573	3376	3115	3884	3471	36.42	41.63	51.72	45.28	39.29
PGAL8A_00115200	720	411	57.08	PF3D7_0822100	mediator of RNA polymerase II transcription subunit 7, putative		0.0574	0.1869	0.2527	0.0179	0.2525	0.0476	0.1801	0.2328	0.1683	0.1589	0.1577	0.1527	0.2253	0.2464	0.1648	0.156	0.2232	0.2158	0.2122	0.2386	0.2683	0.2307	0.2255	0.2953	0.2846	0.3301	0.3184	0.0062	6.271	0.10848	1755	1587	1827	389	1590	2271	1689	1669	63.75	62.26	41.06	33.79	88.26
PGAL8A_00115400	3945	1503	38.1	PF3D7_0822200	phosphorylated CTD interacting factor 1 WW domain-containing protein, putative		0.1099	0.3011	0.6734	0.0194	0.6364	0.1692	0.3002	0.5204	0.3386	0.3297	0.3214	0.3172	0.5063	0.63	0.3446	0.335	0.6153	0.3881	0.3641	0.6183	0.6751	0.3897	0.3667	0.5179	0.511	0.5851	0.5811	0.0366	6.879	0.1843	404	553	164	322	144	103	553	222	54.8	39.41	15.98	12.13	35.61
PGAL8A_00115500	252	249	98.81	PF3D7_0822300	small nuclear ribonucleoprotein G, putative	SMX2	0.0049	0.0314	0.0567	0.0001	0.041	0.0105	0.0318	0.0502	0.0455	0.0399	0.0281	0.0281	0.0452	0.0359	0.0507	0.0451	0.066	0.0508	0.0507	0.0663	0.0567	0.0514	0.0511	0.072	0.0652	0.0636	0.0551	0.0049	16.232	0.01096	4134	4051	3910	3612	4029	3939	4046	3949	89.18	81.74	77.76	65.45	92.64
PGAL8A_00115600	1596	741	46.43	PF3D7_0822400	conserved Plasmodium protein, unknown function		0.0739	0.2735	0.4843	0.0093	0.4779	0.1377	0.2765	0.394	0.3004	0.3126	0.2664	0.2694	0.3468	0.4066	0.2779	0.2818	0.4689	0.3781	0.3955	0.4748	0.4845	0.3725	0.3925	0.4898	0.4642	0.5156	0.4818	0.0707	6.245	0.08056	1137	725	486	1338	371	254	707	532	43.43	32.49	16.41	21.06	31.56
PGAL8A_00115700	597	486	81.41	PF3D7_0822500	dynein light chain 1 // leucine-rich repeat protein	PfLRR7	0.0074	0.0415	0.0636	0.0001	0.0349	0.0136	0.0418	0.0407	0.0673	0.0654	0.0411	0.041	0.037	0.0291	0.0714	0.0695	0.0649	0.0756	0.073	0.0644	0.0633	0.0759	0.0734	0.0797	0.0777	0.0774	0.0752	0.0077	13.56	0.01016	4046	3931	3841	3612	4085	3833	3927	4029	56.83	36.97	16.69	5.14	67.89
PGAL8A_00115800	2280	2196	96.32	PF3D7_0822600	protein transport protein SEC23	PfSEC23	0.0027	0.0124	0.0191	0.0005	0.0216	0.0062	0.0118	0.0212	0.0347	0.0335	0.0143	0.0137	0.0222	0.0226	0.036	0.0345	0.0204	0.0358	0.0345	0.0198	0.0184	0.0354	0.0339	0.0376	0.0352	0.0403	0.0378	0.0042	277.772	0.00384	4194	4218	4190	3561	4175	4084	4222	4187	93.98	85.22	93.61	92.54	75.45
PGAL8A_00115900	2562	1071	41.8	PF3D7_0822700	thrombospondin-related protein 1, putative		0.0595	0.2687	0.4015	0.0236	0.3598	0.14	0.26	0.321	0.342	0.3269	0.2796	0.2692	0.353	0.3904	0.3414	0.3398	0.3645	0.3175	0.321	0.3635	0.3962	0.3128	0.3186	0.4198	0.4176	0.4517	0.4566	0.0535	0.669	0.07464	1676	757	794	171	801	237	826	898	41.32	23.42	20.34	26.28	19.65
PGAL8A_00116000	972	891	91.67	PF3D7_0822800	U5 small nuclear ribonucleoprotein 40 kDa protein, putative		0.0256	0.1	0.1957	0.0039	0.1815	0.0664	0.1038	0.1733	0.1335	0.1353	0.0907	0.0945	0.1728	0.1746	0.124	0.1261	0.1813	0.1513	0.1481	0.1834	0.1975	0.1527	0.149	0.2114	0.2038	0.2198	0.2138	0.0092	32.267	0.03876	3255	3014	2390	2676	2374	1532	2938	2403	73.71	71.28	64.15	48.55	55.17
PGAL8A_00116100	2739	1122	40.96	PF3D7_0822900	conserved Plasmodium protein, unknown function		0.1305	0.4116	0.4289	0.0172	0.4834	0.1041	0.4095	0.4583	0.5682	0.5427	0.4088	0.414	0.4646	0.4671	0.5921	0.5318	0.4322	0.5066	0.5031	0.4301	0.4311	0.4982	0.4897	0.5041	0.5012	0.492	0.4701	0.0511	254.507	0.0765	220	209	676	433	360	652	217	342	44.76	11.96	67.79	84.73	12.48
PGAL8A_00116200	3057	1593	52.11	PF3D7_0823000	serine/threonine protein kinase VPS15, putative		0.0502	0.1804	0.3135	0.0101	0.2548	0.0739	0.183	0.2397	0.1969	0.2016	0.1802	0.1801	0.2347	0.2613	0.182	0.1841	0.304	0.2507	0.2524	0.3056	0.3147	0.2514	0.2557	0.3189	0.3054	0.3388	0.3341	0.0417	8.847	0.08378	2084	1689	1325	1178	1569	1292	1634	1603	36.7	47.65	27.85	29.23	18.97
PGAL8A_00116300	687	462	67.25	PF3D7_0823100	RWD domain-containing protein, putative		0.0413	0.095	0.1132	0.0001	0.136	0.031	0.0946	0.1291	0.1239	0.1202	0.1151	0.1142	0.1463	0.1565	0.1572	0.1527	0.1093	0.1517	0.1499	0.1091	0.1132	0.1503	0.1491	0.1392	0.1428	0.1506	0.1505	0.0124	35.691	0.02276	2493	3108	3337	3612	2940	3070	3113	2985	76.23	72.23	34.83	21.65	62.39
PGAL8A_00116400	861	804	93.38	PF3D7_0823200	RNA-binding protein, putative		0.0015	0.037	0.076	0.0016	0.0564	0.0513	0.0367	0.0841	0.055	0.0563	0.0388	0.0385	0.0834	0.0585	0.0564	0.0583	0.1067	0.0629	0.0665	0.1059	0.0754	0.0628	0.0663	0.1074	0.1112	0.0811	0.0859	0.0092	1522.06	0.0265	4230	3986	3745	3361	3894	2099	3990	3570	98.98	99.29	98.86	98.72	97.02
PGAL8A_00116500	6102	1701	27.88	PF3D7_0823300	histone acetyltransferase GCN5		0.0269	0.0862	0.1156	0.0043	0.1068	0.044	0.083	0.1003	0.097	0.1	0.0943	0.0908	0.0934	0.1075	0.0995	0.1017	0.1044	0.1029	0.1001	0.1013	0.1104	0.1018	0.103	0.1088	0.1083	0.1133	0.1175	0.0182	155.12	0.04026	3189	3264	3311	2565	3321	2426	3329	3365	88.38	93.94	87.66	81.18	63.55
PGAL8A_00116600	1500	1035	69	PF3D7_0823400	alpha/beta hydrolase, putative		0.0535	0.1446	0.2355	0.0068	0.2165	0.0558	0.1467	0.2129	0.1868	0.1849	0.1445	0.1473	0.2149	0.2236	0.1826	0.1855	0.2323	0.2049	0.2019	0.2334	0.2392	0.2106	0.2057	0.2671	0.266	0.2722	0.2716	0.0229	4.054	0.0654	1937	2254	2003	1864	1972	1929	2222	1905	11.94	20.52	8.12	5.14	24.27
PGAL8A_00116700	1482	987	66.6	PF3D7_0823500	inner membrane complex protein 1i, putative		0.0887	0.2957	0.4313	0.0023	0.455	0.103	0.2998	0.4328	0.3911	0.3883	0.2916	0.2955	0.4305	0.426	0.3718	0.3712	0.4219	0.3659	0.3629	0.4226	0.4283	0.3708	0.3678	0.4217	0.4128	0.4053	0.3913	0.0271	59.285	0.11038	746	586	662	3154	425	669	555	419	52.61	11.77	20.08	5.14	26.24
PGAL8A_00116800	1290	804	62.33	PF3D7_0823600	lipoate-protein ligase B		0.0984	0.2759	0.3532	0.0161	0.3458	0.0738	0.2796	0.3263	0.2516	0.2468	0.2262	0.2265	0.3251	0.3513	0.2325	0.2235	0.3356	0.2702	0.2653	0.3384	0.3512	0.2758	0.2706	0.3013	0.2903	0.3309	0.32	0.0078	25.904	0.16932	548	711	1059	518	874	1297	684	866	51.72	29.62	10.87	22.28	9.69
PGAL8A_00116900	198	159	80.3	PF3D7_0823700	mitochondrial import receptor subunit TOM7, putative		0.0243	0.165	0.2084	0.0001	0.2021	0.057	0.1663	0.2489	0.1863	0.1774	0.1752	0.1768	0.2528	0.2247	0.1903	0.183	0.2375	0.1772	0.1919	0.2385	0.2077	0.1825	0.1952	0.2312	0.2464	0.2196	0.2367	0.0153	36.591	0.0871	3306	1908	2270	3612	2136	1870	1905	1509	83.61	76.37	61.1	52.66	78.31
PGAL8A_00117000	1965	1368	69.62	PF3D7_0823800	DnaJ protein, putative		0.0524	0.1219	0.1706	0.0033	0.1973	0.0527	0.1228	0.201	0.1725	0.1672	0.1215	0.1234	0.1828	0.1847	0.1832	0.1772	0.1609	0.1605	0.1576	0.1621	0.1718	0.1621	0.1592	0.1945	0.1839	0.2016	0.1962	0.0157	89.293	0.0255	1979	2642	2664	2843	2195	2046	2627	2039	66.85	73.52	78.97	77.76	26.52
PGAL8A_00117100	957	831	86.83	PF3D7_0823900	dicarboxylate/tricarboxylate carrier	PfDTC	0.0446	0.054	0.0531	0.0015	0.0566	0.032	0.0553	0.0629	0.0777	0.0737	0.0708	0.0723	0.0903	0.0801	0.1031	0.0993	0.0505	0.069	0.0653	0.0485	0.0511	0.0672	0.0635	0.0701	0.0662	0.0779	0.0779	0.0144	47.782	0.02756	2349	3779	3938	3385	3892	3021	3773	3810	48.19	62.77	69.17	66.73	71.78
PGAL8A_00117200	2265	963	42.52	PF3D7_0824000	conserved Plasmodium protein, unknown function		0.1128	0.3688	0.4329	0.0089	0.4215	0.0737	0.3618	0.416	0.4174	0.4097	0.3556	0.3515	0.3725	0.3686	0.3987	0.3809	0.4536	0.4282	0.4077	0.4594	0.4379	0.4286	0.4122	0.4285	0.4494	0.4039	0.4191	0.0476	2.105	0.15864	371	306	654	1417	517	1299	331	461	17.85	7.62	12.36	18.63	10.58
PGAL8A_00117300	1224	798	65.2	PF3D7_0824100	exonuclease, putative		0.0613	0.1469	0.1605	0.0107	0.1285	0.0275	0.1461	0.1303	0.1427	0.1365	0.1361	0.1354	0.1001	0.1091	0.1259	0.1179	0.156	0.1695	0.1627	0.1575	0.1622	0.1664	0.1596	0.1549	0.1443	0.1715	0.1669	0.0094	5.019	0.0929	1592	2217	2791	1086	3057	3232	2229	2968	8.62	36.7	30.97	5.14	53.94
PGAL8A_00117400	3114	2055	65.99	PF3D7_0824200	conserved Plasmodium protein, unknown function		0.0364	0.1004	0.13	0.0035	0.1468	0.0504	0.1014	0.144	0.1304	0.1256	0.0961	0.096	0.1311	0.1321	0.1242	0.1218	0.1313	0.1144	0.1113	0.1327	0.1315	0.1155	0.1124	0.1836	0.1798	0.1891	0.1857	0.0072	19.381	0.03998	2727	3007	3124	2791	2799	2142	2990	2782	11.06	31.38	29.08	28.44	24.98
PGAL8A_00117500	2214	1389	62.74	PF3D7_0824300	GTP-binding protein, putative		0.0518	0.13	0.2229	0.0117	0.1946	0.0627	0.1284	0.1853	0.1389	0.1442	0.1358	0.1323	0.1844	0.1991	0.1393	0.1409	0.1972	0.1568	0.1575	0.1907	0.2199	0.1541	0.1548	0.1867	0.1865	0.2021	0.1937	0.0209	32.148	0.06608	2006	2484	2122	941	2217	1652	2526	2236	20.62	23.18	33.94	50.96	28.61
PGAL8A_00117600	1713	849	49.56	PF3D7_0824400	nucleoside transporter 2	PfNT2	0.1313	0.2257	0.2488	0.0057	0.2771	0.0664	0.2209	0.2835	0.2499	0.2437	0.2443	0.2416	0.297	0.3042	0.2555	0.247	0.2274	0.2068	0.2204	0.22	0.2415	0.2037	0.2191	0.2371	0.2403	0.2257	0.2394	0.0511	27.976	0.07816	213	1127	1863	2121	1362	1532	1182	1163	50.18	88.84	79.83	72.11	82.92
PGAL8A_00117700	1095	615	56.16	PF3D7_0824500	conserved Plasmodium protein, unknown function		0.0481	0.1617	0.2331	0.0076	0.2547	0.0624	0.1611	0.206	0.1909	0.1886	0.1578	0.1572	0.2176	0.2566	0.2112	0.2087	0.2157	0.2161	0.2238	0.2166	0.2386	0.224	0.232	0.2031	0.2031	0.2245	0.2322	0.0126	11.413	0.07522	2182	1968	2026	1690	1570	1664	1987	1989	35.75	73.65	57.88	35.54	53.57
PGAL8A_00117800	735	456	62.04	PF3D7_0824600	Fe-S cluster assembly protein DRE2, putative		0.0293	0.0919	0.1679	0.005	0.1508	0.0333	0.0944	0.15	0.1323	0.129	0.0953	0.0975	0.1446	0.1454	0.1254	0.1222	0.1651	0.155	0.1506	0.1663	0.1692	0.1525	0.1486	0.1848	0.1748	0.1818	0.1731	0.0113	56.949	0.05004	3077	3164	2697	2341	2757	2949	3119	2690	72.32	66.49	35.62	39.5	78
PGAL8A_00117900	1767	1068	60.44	PF3D7_0824700	lipase maturation factor, putative		0.0958	0.2362	0.3137	0.0091	0.302	0.0451	0.2354	0.3156	0.2537	0.2395	0.2204	0.2176	0.2684	0.2694	0.2487	0.2378	0.3241	0.2744	0.2557	0.323	0.3151	0.2773	0.2586	0.2699	0.2632	0.2845	0.2805	0.0211	8.499	0.1525	589	1019	1323	1374	1163	2375	1025	941	13.69	11.12	50.91	43.43	45.02
PGAL8A_00118000	2820	1149	40.74	PF3D7_0824800	conserved Plasmodium membrane protein, unknown function		0.0381	0.1467	0.2714	0.001	0.233	0.0552	0.1477	0.2207	0.174	0.1722	0.1583	0.1593	0.2427	0.2527	0.1848	0.1805	0.2563	0.1941	0.1879	0.2537	0.2676	0.1951	0.1883	0.2548	0.251	0.2519	0.2475	0.0042	28.81	0.03632	2634	2219	1650	3496	1808	1948	2201	1814	71.99	70.64	46.98	51.96	40.45
PGAL8A_00118100	2964	1080	36.44	PF3D7_0824900	conserved Plasmodium protein, unknown function		0.1352	0.3659	0.728	0.0141	0.6177	0.1111	0.3524	0.6094	0.4407	0.4259	0.4366	0.4137	0.6321	0.6216	0.4813	0.4758	0.7216	0.5111	0.4962	0.7297	0.7417	0.5009	0.4847	0.5828	0.5802	0.6808	0.6827	0.0414	25.545	0.19512	195	311	119	690	161	551	352	126	70.31	66.44	28.01	23.44	20.24
PGAL8A_00118200	5583	1245	22.3	PF3D7_0825000	conserved Plasmodium protein, unknown function		0.1712	0.5042	0.824	0.0112	0.7705	0.1406	0.498	0.6993	0.5759	0.5521	0.4867	0.4819	0.7047	0.7632	0.5705	0.5238	0.7159	0.5346	0.516	0.7114	0.8087	0.5334	0.5148	0.7872	0.7368	0.8332	0.812	0.0298	90.461	0.13148	96	91	65	1007	63	231	98	71	46.04	53.7	48.21	53.83	32.34
PGAL8A_00118300	558	429	76.88	PF3D7_0825100	ankyrin-repeat protein, putative		0.0327	0.1457	0.1878	0.0028	0.126	0.0232	0.147	0.1188	0.1561	0.1509	0.1644	0.1657	0.1374	0.1515	0.1567	0.1518	0.1858	0.2226	0.2076	0.1862	0.1919	0.2238	0.2083	0.1735	0.1781	0.1743	0.1798	0.0133	8.275	0.03686	2911	2232	2477	3014	3083	3424	2218	3144	16.27	18.75	5.94	5.14	69.4
PGAL8A_00118400	489	354	72.39	PF3D7_0825200	translation initiation factor IF-3		0.0497	0.1063	0.0948	0	0.1479	0.0339	0.1057	0.1409	0.1407	0.1359	0.0854	0.0848	0.1324	0.1398	0.114	0.1093	0.0767	0.0981	0.0934	0.0765	0.0946	0.0977	0.0931	0.1295	0.1251	0.1424	0.1369	0.0036	12.628	0.05482	2113	2887	3554	3943	2787	2915	2910	2824	14.57	17.17	58.01	61.81	74.85
PGAL8A_00118500	447	192	42.95	PF3D7_0825300	SAYSvFN domain-containing protein, putative		0.02	0.0854	0.1804	0.0081	0.1725	0.0627	0.0777	0.1747	0.1517	0.1364	0.0859	0.0779	0.1529	0.1447	0.1522	0.1302	0.1885	0.1959	0.1696	0.1769	0.1679	0.1847	0.1592	0.1947	0.1706	0.2213	0.1963	0.0223	17.845	0.1359	3520	3284	2560	1586	2498	1652	3404	2383	39.1	37.84	46.2	41.51	84.14
PGAL8A_00118600	234	189	80.77	PF3D7_0825400	conserved Apicomplexan protein, unknown function		0.0126	0.0193	0.0535	0.0001	0.0491	0.0003	0.0191	0.0479	0.0703	0.0617	0.0326	0.0324	0.05	0.0514	0.0844	0.0756	0.0528	0.0691	0.0607	0.0532	0.054	0.069	0.0607	0.0338	0.026	0.0333	0.0257	0.007	106.197	0.01182	3852	4163	3935	3612	3953	4251	4163	3972	44.15	43.48	52.16	36.33	88.63
PGAL8A_00118700	2061	681	33.04	PF3D7_0825500	protein KRI1, putative		0.0656	0.1272	0.1865	0.0051	0.1674	0.0348	0.1336	0.1706	0.166	0.1706	0.1319	0.1383	0.1697	0.1563	0.1684	0.1749	0.2037	0.1854	0.1867	0.2096	0.1924	0.1874	0.186	0.2125	0.2196	0.2143	0.2169	0.0137	49.058	0.05112	1421	2539	2491	2320	2556	2872	2436	2438	81.98	77.64	41.75	27.8	35.92
PGAL8A_00118800	258	255	98.84	PF3D7_0825600	cytochrome c oxidase assembly protein, putative		0.0189	0.0688	0.1251	0.0001	0.0897	0.0096	0.0686	0.0835	0.0987	0.0898	0.0908	0.0904	0.0958	0.1032	0.1099	0.1	0.118	0.1315	0.1215	0.1181	0.1252	0.1331	0.1227	0.1034	0.0965	0.111	0.1031	0.0051	8.629	0.02458	3562	3562	3186	3612	3521	3972	3567	3579	77.65	48.62	47.45	47.57	83.66
PGAL8A_00118900	888	528	59.46	PF3D7_0825700	conserved Plasmodium protein, unknown function		0.0729	0.2375	0.336	0.0087	0.2491	0.0218	0.2284	0.2319	0.2679	0.2593	0.2395	0.2337	0.2396	0.2554	0.2598	0.2516	0.3091	0.3101	0.3158	0.3035	0.3302	0.3184	0.3246	0.3046	0.2958	0.308	0.2991	0.0139	24.893	0.04264	1171	1006	1158	1461	1623	3479	1095	1679	21.95	14.28	4.5	5.14	81.48
PGAL8A_00119000	1245	618	49.64	PF3D7_0825800	conserved Plasmodium protein, unknown function		0.0468	0.1455	0.2027	0.002	0.1812	0.0395	0.1459	0.1821	0.1759	0.1817	0.129	0.1323	0.159	0.1647	0.1734	0.1795	0.1932	0.2279	0.2318	0.1973	0.207	0.2244	0.2282	0.2296	0.2293	0.2144	0.2173	0.0057	34.17	0.06226	2243	2238	2333	3240	2378	2626	2234	2280	37.18	17.45	8.62	5.14	80.11
PGAL8A_00119100	1164	441	37.89	PF3D7_0825900	conserved Plasmodium protein, unknown function		0.1005	0.2773	0.3872	0.0102	0.3369	0.0838	0.2863	0.3266	0.5139	0.4638	0.2174	0.2241	0.329	0.3236	0.4415	0.4035	0.42	0.4279	0.3923	0.4072	0.3839	0.4375	0.3986	0.523	0.4889	0.5122	0.4789	0.0193	14.28	0.08268	516	699	871	1159	931	1018	644	865	27.94	17.77	7.19	14.11	48.47
PGAL8A_00119200	2706	843	31.15	PF3D7_0826000	conserved Plasmodium protein, unknown function		0.0742	0.1985	0.2845	0.008	0.2859	0.0597	0.1935	0.3025	0.2172	0.2231	0.1976	0.1909	0.2876	0.2695	0.22	0.2264	0.2656	0.1906	0.1934	0.264	0.278	0.1859	0.1895	0.2786	0.2833	0.2874	0.2826	0.0148	9.422	0.0835	1130	1430	1550	1601	1279	1779	1491	1026	36.16	58.78	17.48	19.44	23.5
PGAL8A_00119300	23940	10710	44.74	PF3D7_0826100	E3 ubiquitin-protein ligase, putative		0.0271	0.1043	0.1683	0.004	0.1281	0.0406	0.1042	0.1233	0.1342	0.1305	0.1056	0.1052	0.1267	0.1305	0.1342	0.131	0.1618	0.1587	0.1543	0.1611	0.1679	0.1596	0.1554	0.1771	0.1727	0.1866	0.1827	0.0117	210.469	0.03042	3175	2932	2695	2658	3061	2575	2930	3064	84.07	88.42	68.58	56.88	56.15
PGAL8A_00119400	2205	888	40.27	PF3D7_0826200	alpha/beta hydrolase, putative		0.0638	0.1571	0.1518	0.0069	0.1538	0.0324	0.1501	0.1525	0.1793	0.1739	0.1535	0.1496	0.1526	0.1534	0.1761	0.1737	0.1553	0.1886	0.1843	0.1442	0.1461	0.1881	0.1819	0.1644	0.1582	0.1642	0.1632	0.0168	66.76	0.0546	1499	2048	2880	1843	2726	3002	2164	2662	13.87	5.35	19.06	26.71	18.3
PGAL8A_00119500	1563	774	49.52	PF3D7_0826300	SPRY domain, putative		0.0649	0.1016	0.098	0.003	0.0914	0.0162	0.105	0.0824	0.09	0.088	0.1099	0.1135	0.1059	0.098	0.1126	0.1108	0.1047	0.0957	0.0973	0.1054	0.0985	0.0959	0.0974	0.082	0.0803	0.0844	0.0828	0.0015	35.009	0.02306	1453	2988	3520	2943	3502	3716	2918	3594	19.27	42.17	69.88	61.36	58.54
PGAL8A_00119600	942	669	71.02	PF3D7_0826400	dehydrodolichyl diphosphate synthetase, putative		0.0523	0.1541	0.1699	0.0057	0.1547	0.0475	0.1545	0.1382	0.1997	0.2023	0.1377	0.1379	0.1386	0.1586	0.1853	0.194	0.1625	0.2123	0.2052	0.1702	0.1799	0.2186	0.2111	0.1751	0.1754	0.2133	0.2048	0.0235	46.773	0.07826	1983	2096	2675	2121	2719	2273	2099	2855	21.97	8.84	60.24	71.77	71.06
PGAL8A_00119700	3792	2499	65.9	PF3D7_0826500	ubiquitin conjugation factor E4 B, putative	UFD2	0.0222	0.0763	0.1446	0.0028	0.1285	0.0412	0.0774	0.1131	0.0996	0.0927	0.0763	0.0771	0.1108	0.1279	0.0993	0.0936	0.1286	0.1195	0.1139	0.1294	0.1455	0.1207	0.1151	0.1375	0.1344	0.1529	0.1491	0.0106	124.998	0.01876	3407	3422	2974	3014	3057	2548	3413	3221	78.05	64.67	77.39	79.33	62.82
PGAL8A_00119800	810	561	69.26	PF3D7_0826600	SNARE protein, putative	PfVAMP7	0.0348	0.1058	0.1877	0.0001	0.1696	0.0615	0.1058	0.173	0.1455	0.1403	0.0906	0.0907	0.1505	0.1449	0.145	0.1379	0.1682	0.162	0.1553	0.1684	0.1878	0.162	0.1554	0.1964	0.1822	0.1966	0.1822	0.0086	31.971	0.03162	2812	2899	2479	3612	2539	1695	2909	2405	80.15	55.82	39.12	54.15	72.2
PGAL8A_00119900	969	966	99.69	PF3D7_0826700	receptor for activated c kinase	PfRACK	0.0113	0.0163	0.0255	0.0001	0.026	0.0028	0.0164	0.0234	0.0373	0.0383	0.0204	0.0205	0.0262	0.0261	0.0353	0.0363	0.0249	0.0399	0.0383	0.025	0.0256	0.0399	0.0384	0.0252	0.026	0.029	0.0301	0.0013	649.166	0.00814	3907	4186	4149	3612	4142	4190	4184	4169	99.48	98.77	98.41	94.93	95.1
PGAL8A_00120100	1851	492	26.58	PF3D7_0826900	conserved Plasmodium protein, unknown function		0.0762	0.4165	0.6814	0.0101	0.6198	0.121	0.4181	0.6019	0.4276	0.3756	0.3852	0.3863	0.5115	0.5567	0.3867	0.343	0.6635	0.5071	0.4787	0.6577	0.6975	0.5478	0.5173	0.5077	0.4854	0.5072	0.4904	0.0536	26.953	0.23206	1076	197	157	1178	159	417	200	130	48.71	43.17	58.4	51.58	21.98
PGAL8A_00120200	3486	1551	44.49	PF3D7_0827000	ATP-dependent RNA helicase DBP10, putative		0.0396	0.1374	0.1949	0.0054	0.1804	0.0493	0.137	0.1577	0.1306	0.1322	0.1396	0.1392	0.1663	0.1867	0.1386	0.1393	0.1768	0.153	0.1576	0.1788	0.1971	0.1561	0.1606	0.2042	0.1985	0.2224	0.217	0.0235	48.939	0.0247	2563	2389	2396	2202	2383	2189	2387	2604	79.56	82.81	58.2	37.39	16.18
PGAL8A_00120300	3825	1722	45.02	PF3D7_0827100	translation initiation factor IF-2, putative		0.0534	0.1735	0.2985	0.0147	0.2514	0.102	0.1714	0.2213	0.1723	0.1801	0.1862	0.1843	0.2228	0.257	0.1661	0.1751	0.2535	0.2131	0.2236	0.2538	0.2951	0.2091	0.219	0.2515	0.2486	0.2934	0.303	0.049	33.658	0.04974	1944	1791	1448	630	1599	691	1832	1807	57.88	72.17	51.62	42.2	47.05
PGAL8A_00120500	2796	276	9.87	PF3D7_0827300	conserved Plasmodium protein, unknown function		0.0947	0.3555	0.5687	0.0266	0.5366	0.0643	0.3775	0.4922	0.3835	0.3375	0.3141	0.3258	0.4308	0.5105	0.3279	0.2848	0.5503	0.4734	0.4856	0.5232	0.5417	0.4583	0.4652	0.538	0.5262	0.5723	0.585	0.0372	60.29	0.09086	611	348	296	115	266	1600	280	265	77.22	72.46	53.23	30	41.23
PGAL8A_00120600	621	381	61.35	PF3D7_0827400	conserved Plasmodium protein, unknown function		0.0842	0.2582	0.3024	0.0233	0.2847	0.0812	0.2847	0.2911	0.2337	0.2325	0.2569	0.2834	0.2839	0.2666	0.2254	0.2247	0.3326	0.2703	0.2578	0.3455	0.3154	0.3011	0.2926	0.2851	0.2774	0.2888	0.2881	0.0091	28.464	0.14406	856	833	1408	180	1289	1085	651	1102	56	38.45	24.82	52.52	84.66
PGAL8A_00120700	927	615	66.34	PF3D7_0827500	apicoplast ribosomal protein L21 precursor, putative		0.0294	0.0945	0.1459	0.0073	0.1363	0.0261	0.0856	0.1218	0.1109	0.0946	0.0846	0.0759	0.1231	0.143	0.1067	0.1091	0.1302	0.1211	0.1151	0.1199	0.1352	0.1132	0.1074	0.1376	0.1272	0.1484	0.1361	0.0215	48.675	0.02922	3070	3122	2958	1749	2935	3299	3279	3090	42.81	36.28	65.78	49.11	44.4
PGAL8A_00120800	4638	1713	36.93	PF3D7_0827600	conserved Plasmodium protein, unknown function		0.0846	0.2206	0.3255	0.0086	0.3364	0.0909	0.2217	0.3098	0.2832	0.272	0.2021	0.2014	0.2852	0.3316	0.2537	0.2588	0.2906	0.2853	0.2844	0.293	0.3269	0.2841	0.2813	0.341	0.3382	0.3709	0.3633	0.0554	52.114	0.07456	849	1180	1226	1492	934	870	1173	982	31	53.49	62.96	54.08	26.99
PGAL8A_00120900	2256	573	25.4	PF3D7_0827700	magnesium transporter, putative		0.0922	0.1559	0.2374	0.0066	0.2989	0.1009	0.1653	0.2744	0.2309	0.2161	0.1548	0.1641	0.2652	0.2936	0.2333	0.2092	0.2123	0.2014	0.1909	0.2138	0.2393	0.1972	0.1937	0.3088	0.2999	0.3058	0.2986	0.0426	9.38	0.0807	662	2070	1979	1906	1188	699	1923	1257	12.74	8.1	6.53	5.14	14.49
PGAL8A_00121000	6501	2325	35.76	PF3D7_0827800	SET domain protein, putative	KMT1	0.0258	0.1451	0.1835	0.0132	0.1404	0.0452	0.1428	0.1364	0.128	0.1255	0.1443	0.14	0.1355	0.1398	0.1318	0.131	0.175	0.1722	0.171	0.1761	0.1841	0.1739	0.1693	0.1502	0.1454	0.1477	0.1444	0.0139	46.772	0.02126	3245	2246	2526	772	2885	2372	2290	2884	76.96	60.59	66.42	73.71	58.01
PGAL8A_00121100	1449	1314	90.68	PF3D7_0827900	protein disulfide isomerase	PfPDI	0.0224	0.0819	0.0868	0.0054	0.0923	0.0167	0.0788	0.0847	0.0954	0.092	0.0814	0.0785	0.0899	0.0954	0.0932	0.0927	0.0821	0.0957	0.0881	0.0763	0.0818	0.0912	0.0848	0.0841	0.0762	0.0891	0.0795	0.0145	3234.52	0.01876	3395	3344	3648	2202	3494	3691	3389	3562	97.37	97.52	98.84	98.34	96.75
PGAL8A_00121200	804	528	65.67	PF3D7_0828000	rhomboid protease ROM3		0.0228	0.1537	0.2417	0.0214	0.1973	0.0362	0.1359	0.1831	0.1238	0.1242	0.1404	0.1225	0.183	0.2036	0.1248	0.1242	0.2283	0.2012	0.2089	0.2174	0.2346	0.1877	0.1879	0.2321	0.2324	0.2337	0.2379	0.0053	7.221	0.07156	3374	2109	1941	234	2195	2799	2405	2264	10.07	13.58	17.12	5.14	79.54
PGAL8A_00121300	2826	1074	38	PF3D7_0828100	conserved Plasmodium protein, unknown function		0.1227	0.4337	0.6519	0.0366	0.7145	0.1684	0.4189	0.6689	0.4888	0.4767	0.4395	0.439	0.6365	0.6939	0.4922	0.4783	0.6632	0.565	0.5474	0.6561	0.6593	0.5333	0.517	0.7113	0.7146	0.759	0.7471	0.0412	7.299	0.15246	281	172	187	34	86	106	198	89	28.7	44.04	22.49	18.1	32.49
PGAL8A_00121400	4011	1905	47.49	PF3D7_0828200	leucine--tRNA ligase, putative // leucyl-tRNA synthetase, putative		0.0772	0.194	0.3282	0.0164	0.317	0.1043	0.1868	0.2895	0.2151	0.2215	0.1971	0.19	0.2829	0.3204	0.2195	0.2162	0.289	0.2463	0.2438	0.2884	0.3267	0.2456	0.2422	0.3078	0.3088	0.3399	0.3502	0.0412	12.836	0.08654	1046	1492	1209	496	1061	650	1586	1112	48.07	65.59	50.08	46.53	38.12
PGAL8A_00121500	1488	369	24.8	PF3D7_0828300	conserved Plasmodium protein, unknown function		0.0409	0.1376	0.2339	0.0193	0.1635	0.0531	0.1352	0.1727	0.2346	0.2349	0.1487	0.1524	0.2203	0.2127	0.2296	0.2298	0.2222	0.2741	0.2745	0.2133	0.2253	0.2632	0.2594	0.2781	0.2845	0.2538	0.2532	0.0276	245.33	0.05734	2510	2387	2015	326	2604	2035	2411	2408	48.12	72.18	74.74	82.15	35.31
PGAL8A_00121600	1362	729	53.52	PF3D7_0828400	mitochondrial inner membrane protein OXA1, putative		0.0422	0.1422	0.1771	0.0051	0.1604	0.0257	0.1442	0.165	0.164	0.1507	0.1584	0.1555	0.171	0.1618	0.1662	0.1522	0.1757	0.1599	0.1552	0.1727	0.1741	0.1624	0.1576	0.1927	0.1781	0.201	0.1865	0.0169	19.556	0.04544	2452	2309	2603	2320	2645	3310	2270	2513	8.33	27.5	35.9	40.82	18.21
PGAL8A_00121700	1026	744	72.51	PF3D7_0828500	translation initiation factor eIF-2B subunit alpha, putative		0.0556	0.1719	0.2326	0.0016	0.2209	0.0331	0.1695	0.2303	0.1921	0.1986	0.174	0.1716	0.2205	0.2054	0.1955	0.2001	0.2325	0.2617	0.2711	0.2297	0.2328	0.2618	0.2713	0.258	0.2565	0.2413	0.2457	0.0299	14.667	0.11018	1847	1818	2027	3361	1929	2958	1852	1697	16.44	18.57	75.09	74.85	73.5
PGAL8A_00121900	1497	660	44.09	PF3D7_0828600	folate transporter 1		0.0532	0.1575	0.1931	0.0093	0.1847	0.0393	0.1625	0.1841	0.1806	0.1809	0.1574	0.1625	0.189	0.177	0.1903	0.1935	0.2017	0.2032	0.2087	0.2054	0.1973	0.202	0.2079	0.2169	0.2363	0.2158	0.2354	0.03	5.964	0.04826	1952	2042	2416	1338	2341	2635	1970	2252	24.39	5.12	67.13	78.76	83.02
PGAL8A_00122000	3261	798	24.47	PF3D7_0828700	conserved Plasmodium protein, unknown function		0.088	0.2674	0.3364	0.0176	0.3061	0.1051	0.2662	0.313	0.3047	0.3035	0.2581	0.2534	0.2853	0.2797	0.3053	0.2922	0.3311	0.3274	0.3213	0.3225	0.3264	0.3219	0.3144	0.3597	0.3438	0.3753	0.3698	0.0148	15.214	0.08536	761	761	1155	404	1135	636	778	960	26.33	4.5	25.88	47.25	33.44
PGAL8A_00122100	2256	1083	48.01	PF3D7_0828800	GPI-anchored micronemal antigen	PSOP9	0.0259	0.2043	0.2767	0.0066	0.2185	0.0559	0.2014	0.2142	0.1979	0.1966	0.2011	0.2015	0.2122	0.2218	0.1965	0.1985	0.2854	0.271	0.2763	0.2816	0.2729	0.2747	0.2799	0.216	0.2167	0.2006	0.2003	0.0167	11.06	0.05794	3240	1352	1619	1906	1952	1924	1398	1888	30.26	34.1	59.84	69.4	41.47
PGAL8A_00122200	576	396	68.75	PF3D7_0828900	conserved Plasmodium protein, unknown function		0.0433	0.1641	0.216	0.0031	0.1316	0.0407	0.1719	0.1353	0.1727	0.1712	0.1783	0.1857	0.1386	0.128	0.1742	0.1577	0.1957	0.2293	0.2364	0.2036	0.2213	0.2253	0.2314	0.1485	0.1476	0.1498	0.1431	0.0183	26.083	0.06172	2397	1934	2184	2910	3005	2571	1824	2893	39.13	11.93	75.68	84.59	67.72
PGAL8A_00122300	4875	2142	43.94	PF3D7_0829000	conserved Plasmodium membrane protein, unknown function		0.0789	0.362	0.5099	0.0212	0.4242	0.1203	0.352	0.4246	0.321	0.3223	0.357	0.338	0.4245	0.4329	0.3173	0.3205	0.5188	0.4092	0.4183	0.5222	0.5197	0.4089	0.4073	0.4818	0.4656	0.4859	0.4731	0.0383	34.724	0.11314	982	322	424	247	512	423	354	441	51.12	54.49	49.39	51.19	29.7
PGAL8A_00122400	651	315	48.39	PF3D7_0829100	conserved protein, unknown function		0.0445	0.0678	0.0938	0.0002	0.0777	0.0127	0.0671	0.0776	0.1245	0.0989	0.0679	0.0665	0.0724	0.07	0.1145	0.0896	0.1059	0.1435	0.1167	0.105	0.093	0.1437	0.1163	0.1383	0.1108	0.1385	0.1102	0.0204	37.435	0.02846	2354	3581	3567	3573	3679	3859	3592	3663	78.4	80.09	69.26	68.26	82.41
PGAL8A_00122500	819	813	99.27	PF3D7_0829200	prohibitin, putative		0.0134	0.0207	0.024	0.0029	0.0184	0.0034	0.0238	0.0186	0.0235	0.0236	0.0165	0.0165	0.0173	0.0172	0.0209	0.0209	0.024	0.0249	0.0248	0.0276	0.0276	0.0279	0.0278	0.022	0.0219	0.022	0.0219	0.0003	299.876	0.00796	3816	4153	4162	2972	4202	4167	4119	4206	74.5	87.8	73.98	50.68	89.29
PGAL8A_00122600	288	243	84.38	PF3D7_0829300	U6 snRNA-associated Sm-like protein LSm8, putative		0.0051	0.0529	0.034	0.0001	0.0294	0.0004	0.0529	0.0275	0.0651	0.0645	0.0541	0.0541	0.0209	0.0224	0.0671	0.0669	0.0341	0.0778	0.0772	0.0335	0.0339	0.0773	0.0767	0.0634	0.0629	0.0639	0.0634	0.0001	89.945	0.0049	4126	3791	4081	3612	4122	4240	3792	4137	71.92	77.77	81.6	72.27	84.39
PGAL8A_00122700	1329	903	67.95	PF3D7_0829400	prolyl 4-hydroxylase subunit alpha, putative		0.0313	0.1242	0.172	0.0067	0.1251	0.0331	0.1198	0.115	0.1603	0.1483	0.1354	0.1306	0.1248	0.1296	0.1668	0.1536	0.1618	0.1821	0.1664	0.1531	0.1628	0.1764	0.1608	0.1722	0.164	0.1827	0.1709	0.0237	60.795	0.02722	2982	2591	2649	1885	3088	2958	2668	3191	30.38	14.96	66.06	73.81	59.3
PGAL8A_00123600	750	606	80.8	PF3D7_1222500	diphthine--ammonia ligase, putative		0.0325	0.1722	0.1657	0.002	0.2076	0.0433	0.1762	0.1959	0.137	0.1428	0.1681	0.1712	0.1828	0.1974	0.1299	0.136	0.1489	0.1383	0.1383	0.1522	0.1695	0.1414	0.1415	0.1059	0.1006	0.1297	0.1175	0.0083	25.433	0.05292	2926	1810	2731	3240	2082	2459	1749	2095	72.58	67.65	73.83	81.17	81.05
PGAL8A_00123700	7191	1272	17.69	PF3D7_1222600	AP2 domain transcription factor AP2-G	ApiAP2	0.1873	0.704	0.9711	0.0225	1.2195	0.3393	0.7092	1.0547	0.8078	0.8125	0.7533	0.761	1.05	1.2017	0.8561	0.875	1.1287	0.9474	0.9683	1.1168	0.9759	0.9574	0.9582	1.0658	1.0863	1.11	1.0945	0.0566	39.418	0.25168	72	26	33	194	6	2	26	12	27.71	12.46	12.95	10.56	11.51
PGAL8A_00123800	591	321	54.31	PF3D7_1222700	glideosome-associated protein 45		0.0231	0.0487	0.0607	0	0.0556	0.0115	0.0487	0.0608	0.098	0.098	0.0579	0.0579	0.0816	0.0711	0.1023	0.1023	0.0617	0.082	0.082	0.0617	0.0607	0.082	0.082	0.0731	0.0733	0.0591	0.0593	0.0073	138.069	0.06398	3354	3852	3869	3943	3901	3909	3847	3832	70.5	48.9	97.42	98.75	96.52
PGAL8A_00123900	789	522	66.16	PF3D7_1222800	conserved Plasmodium protein, unknown function		0.0402	0.17	0.2041	0.0045	0.1619	0.0244	0.1732	0.1421	0.1454	0.1364	0.1561	0.16	0.1236	0.1498	0.1329	0.126	0.1754	0.1621	0.1545	0.1839	0.2132	0.1643	0.1575	0.1522	0.1436	0.176	0.1669	0.007	20.529	0.03678	2538	1841	2313	2491	2629	3367	1806	2807	15.63	1.22	16.22	5.14	76.01
PGAL8A_00124000	1326	627	47.29	PF3D7_1222900	conserved Plasmodium protein, unknown function		0.1065	0.35	0.5121	0.0063	0.3872	0.0503	0.3486	0.3954	0.2808	0.279	0.3439	0.3424	0.3941	0.4125	0.2751	0.258	0.4749	0.3822	0.3891	0.4742	0.516	0.3801	0.3876	0.416	0.3852	0.4234	0.3943	0.0336	7.327	0.15726	446	366	418	1967	667	2146	367	526	10.04	23.44	36.59	27.4	52.17
PGAL8A_00124100	396	228	57.58	PF3D7_1223000	conserved Plasmodium protein, unknown function		0.0475	0.2295	0.3982	0	0.3578	0.0995	0.2288	0.3118	0.2717	0.2441	0.2642	0.2636	0.3479	0.3868	0.2646	0.2404	0.3923	0.3705	0.3617	0.3922	0.3982	0.3688	0.3598	0.3463	0.3036	0.3991	0.3538	0.0404	13.19	0.07964	2211	1084	808	3943	810	721	1089	970	18.27	16.19	61.12	74.29	76.11
PGAL8A_00124200	1320	1005	76.14	PF3D7_1223100	cAMP-dependent protein kinase regulatory subunit	PfPKAr	0.0366	0.1268	0.1742	0	0.1755	0.0416	0.1265	0.1727	0.1584	0.1506	0.1176	0.1172	0.1639	0.173	0.1603	0.1497	0.1674	0.1774	0.1723	0.1672	0.174	0.1772	0.1721	0.1768	0.1748	0.1929	0.1852	0.0301	342.817	0.0262	2719	2546	2635	3943	2454	2525	2559	2408	52.34	34.79	94.32	98.58	68.95
PGAL8A_00124300	1281	915	71.43	PF3D7_1223200	nucleus export protein BRR6, putative		0.0464	0.1357	0.1796	0.0013	0.1866	0.031	0.1336	0.1873	0.1629	0.1605	0.1277	0.1256	0.1731	0.1717	0.1637	0.1614	0.1755	0.1581	0.1507	0.1732	0.1774	0.1558	0.1486	0.173	0.1686	0.1786	0.1729	0.0103	55.151	0.02494	2258	2406	2575	3426	2319	3070	2436	2202	75.45	68.96	72.79	76.54	58.73
PGAL8A_00124400	3945	1824	46.24	PF3D7_1223300	DNA gyrase subunit A	PfGyrA	0.0332	0.0944	0.1626	0.0032	0.1522	0.0615	0.0941	0.1468	0.1215	0.1183	0.0999	0.0997	0.1505	0.1656	0.1229	0.1195	0.1461	0.1237	0.1165	0.1489	0.1655	0.1239	0.1182	0.1622	0.1624	0.1812	0.1709	0.0197	68.623	0.03414	2880	3124	2765	2874	2749	1695	3124	2730	58.25	62.7	59.03	60.19	11.55
PGAL8A_00124500	4629	2940	63.51	PF3D7_1223400	phospholipid-transporting ATPase, putative		0.0311	0.0685	0.0595	0.0012	0.0778	0.0164	0.0685	0.0763	0.1005	0.0991	0.0655	0.0661	0.0751	0.0742	0.0998	0.0986	0.0616	0.0883	0.0866	0.0617	0.0598	0.0888	0.087	0.0959	0.0947	0.0925	0.0926	0.0089	92.666	0.01896	2992	3565	3876	3456	3678	3708	3571	3674	95	93.68	89.08	90.96	75.61
PGAL8A_00124600	13008	4680	35.98	PF3D7_1223500	conserved Plasmodium protein, unknown function		0.0753	0.2992	0.5519	0.0136	0.5167	0.1514	0.2994	0.4882	0.4807	0.4731	0.3088	0.3089	0.4795	0.4978	0.4859	0.4779	0.5436	0.4994	0.4972	0.5449	0.5555	0.4932	0.4937	0.6603	0.639	0.6784	0.6683	0.0696	37.198	0.10986	1101	562	322	736	303	168	560	273	60.6	58.13	37.82	39.02	33.56
PGAL8A_00124700	4554	1632	35.84	PF3D7_1223600	conserved Plasmodium protein, unknown function		0.0864	0.2391	0.5124	0.0058	0.4449	0.1311	0.2435	0.3884	0.3464	0.347	0.2796	0.2843	0.3774	0.4345	0.363	0.3591	0.4421	0.3785	0.3759	0.4431	0.5139	0.3797	0.3771	0.4294	0.4329	0.5097	0.5158	0.0301	8.132	0.08336	802	995	415	2098	458	308	951	556	36.61	46.43	30.24	36.87	25.46
PGAL8A_00124800	825	816	98.91	PF3D7_1223700	vacuolar iron transporter		0.0147	0.0511	0.0701	0.0015	0.0553	0.0183	0.0497	0.0589	0.1349	0.1322	0.0497	0.0483	0.0567	0.0479	0.1319	0.1292	0.062	0.1265	0.1242	0.0613	0.0686	0.1256	0.1231	0.1146	0.1123	0.1264	0.1242	0.0031	20.253	0.02074	3766	3821	3785	3385	3903	3632	3834	3858	65.83	80.6	85.32	62.16	91.5
PGAL8A_00124900	912	663	72.7	PF3D7_1223800	citrate/oxoglutarate carrier protein, putative		0.0483	0.0561	0.0921	0.0054	0.0907	0.0524	0.0604	0.097	0.0989	0.1025	0.0707	0.0752	0.0897	0.0904	0.1213	0.1248	0.0822	0.0879	0.092	0.0855	0.0962	0.0863	0.0925	0.1247	0.1288	0.1476	0.1493	0.0132	15.5	0.04732	2177	3757	3587	2202	3508	2058	3696	3414	75.9	71.81	52.73	56.98	78.28
PGAL8A_00125000	693	549	79.22	PF3D7_1223900	50S ribosomal protein L24, putative		0.014	0.0295	0.0885	0.0001	0.0733	0.0383	0.0293	0.0781	0.0665	0.0709	0.035	0.0347	0.0716	0.0622	0.0692	0.0639	0.0854	0.0753	0.08	0.0855	0.088	0.0752	0.0799	0.1232	0.1225	0.1295	0.1235	0.0089	40.978	0.01308	3796	4064	3627	3612	3728	2686	4067	3655	43.33	78.36	60.78	63.35	74.68
PGAL8A_00125100	1194	453	37.94	PF3D7_1224000	GTP cyclohydrolase I	GTP-CH	0.0881	0.1766	0.2317	0.0026	0.2847	0.1036	0.1735	0.2614	0.2465	0.2412	0.1582	0.1552	0.2648	0.2846	0.2418	0.2387	0.213	0.1637	0.1693	0.2096	0.2382	0.1655	0.1706	0.2389	0.244	0.2445	0.2571	0.0154	34.51	0.04764	758	1750	2037	3074	1289	660	1801	1380	70.82	73.72	70.31	44.13	66.61
PGAL8A_00125200	576	495	85.94	PF3D7_1224100	conserved Plasmodium protein, unknown function		0.0074	0.0247	0.0334	0.0001	0.0173	0.0054	0.0247	0.0233	0.0297	0.0293	0.0272	0.0273	0.0198	0.0129	0.0329	0.0324	0.0334	0.0348	0.0347	0.0332	0.0342	0.0347	0.0345	0.0356	0.0359	0.0284	0.0271	0.0001	22.165	0.00916	4046	4107	4090	3612	4206	4114	4111	4170	39.24	36.66	90.62	92.31	71.51
PGAL8A_00125300	2454	1716	69.93	PF3D7_1224200	BRO1 domain-containing protein, putative		0.0778	0.2172	0.3906	0.0036	0.3606	0.0867	0.2154	0.3417	0.2666	0.2668	0.232	0.2304	0.3498	0.3635	0.2823	0.2715	0.3846	0.3046	0.3076	0.3817	0.3921	0.3063	0.3085	0.3549	0.3581	0.357	0.3561	0.0284	18.674	0.0647	1023	1213	853	2762	795	965	1242	773	13.17	15.98	23.71	42.41	25.29
PGAL8A_00125400	2373	1593	67.13	PF3D7_1224300	polyadenylate-binding protein, putative	PAB1	0.0081	0.0242	0.0351	0.0022	0.0339	0.0074	0.025	0.0337	0.0544	0.0542	0.0284	0.0293	0.0367	0.0368	0.0553	0.0554	0.0349	0.0563	0.0563	0.0367	0.037	0.0573	0.0573	0.0466	0.0472	0.0484	0.0472	0.0081	1820.74	0.03318	4018	4111	4072	3188	4090	4048	4107	4088	99.6	98.79	98.82	98.67	83.35
PGAL8A_00125500	1626	894	54.98	PF3D7_1224400	conserved Plasmodium protein, unknown function		0.0494	0.1941	0.3393	0	0.2974	0.0643	0.1939	0.239	0.2976	0.2707	0.2038	0.2024	0.2583	0.308	0.3041	0.2842	0.3003	0.3342	0.3249	0.3	0.339	0.3336	0.3244	0.3993	0.388	0.4374	0.4258	0.022	17.175	0.04208	2125	1491	1142	3943	1197	1600	1483	1610	84.14	71.96	32.53	23.16	44.49
PGAL8A_00125600	798	555	69.55	PF3D7_1224500	histone chaperone ASF1, putative		0.0109	0.022	0.0436	0	0.052	0.0142	0.022	0.0481	0.0463	0.0512	0.0223	0.0222	0.0521	0.0592	0.0528	0.0576	0.0376	0.0466	0.0463	0.0376	0.0435	0.0465	0.0462	0.0673	0.0672	0.0678	0.0674	0.0091	299.842	0.00682	3924	4136	4011	3943	3926	3810	4135	3970	40.07	52.73	88.3	81.11	80.15
PGAL8A_00125700	687	444	64.63	PF3D7_1224600	cytochrome c heme lyase, putative		0.0624	0.1609	0.1912	0.0054	0.207	0.0479	0.154	0.2137	0.2201	0.2218	0.1845	0.1769	0.229	0.2265	0.2482	0.2494	0.2013	0.2527	0.2613	0.1938	0.193	0.2446	0.2527	0.2925	0.2878	0.3033	0.2986	0.0309	46.466	0.08696	1550	1980	2439	2202	2087	2259	2104	1894	77.95	86.57	61.33	44.23	75.11
PGAL8A_00125800	4035	1164	28.85	PF3D7_1224700	conserved Plasmodium protein, unknown function		0.1505	0.3179	0.4258	0.0123	0.4492	0.1188	0.3184	0.4095	0.3365	0.3248	0.3144	0.3097	0.4	0.4178	0.3504	0.3322	0.4101	0.3604	0.3457	0.4029	0.4211	0.3692	0.3524	0.4354	0.4216	0.4912	0.444	0.0585	61.663	0.1074	135	477	685	866	443	438	481	479	54.42	41.28	45.04	54.98	18.85
PGAL8A_00125900	972	780	80.25	PF3D7_1224800	conserved Plasmodium protein, unknown function		0.0538	0.1175	0.2317	0.0031	0.2082	0.0564	0.1215	0.1985	0.124	0.1235	0.1276	0.1269	0.1839	0.2011	0.1438	0.1384	0.2109	0.1396	0.1338	0.2052	0.2273	0.139	0.1332	0.1881	0.1804	0.1979	0.1934	0.0165	45.345	0.07794	1921	2717	2037	2910	2072	1898	2643	2061	45.55	27.22	32.04	31.57	36.07
PGAL8A_00126000	330	264	80	PF3D7_1224900	splicing factor 3B subunit 6, putative	SF3B14	0.0013	0.0136	0.008	0.0001	0.0107	0.0005	0.0136	0.0107	0.0233	0.0228	0.0138	0.0139	0.0108	0.0101	0.0231	0.0232	0.0074	0.0189	0.0189	0.0074	0.0081	0.0189	0.0189	0.0272	0.0271	0.028	0.0278	0.0005	34.541	0.00222	4234	4211	4257	3612	4251	4230	4208	4247	77.19	82.01	70.66	63.08	93.56
PGAL8A_00126100	4791	1719	35.88	PF3D7_1225000	conserved Plasmodium protein, unknown function		0.1198	0.3601	0.6513	0.0175	0.5439	0.0838	0.3674	0.5233	0.458	0.5026	0.3438	0.3481	0.5123	0.5528	0.4854	0.5291	0.5758	0.5572	0.5948	0.5917	0.6675	0.5721	0.6195	0.6494	0.6675	0.6711	0.6655	0.0891	5.243	0.19424	306	332	188	414	257	1018	314	220	15.29	41.32	13.97	10.99	13.85
PGAL8A_00126200	4653	2340	50.29	PF3D7_1225100	isoleucine--tRNA ligase, putative		0.0544	0.1549	0.316	0.002	0.3093	0.132	0.1535	0.2588	0.1701	0.1738	0.1654	0.1641	0.2735	0.3145	0.177	0.1809	0.2686	0.1823	0.1896	0.2666	0.3153	0.1812	0.1886	0.2937	0.2992	0.3435	0.3448	0.0381	8.15	0.04352	1899	2084	1302	3240	1117	303	2110	1401	22.52	53.51	24.51	16.44	27.23
PGAL8A_00126300	3663	933	25.47	PF3D7_1225200	conserved Plasmodium protein, unknown function		0.0518	0.1849	0.332	0.005	0.2881	0.0858	0.1824	0.2835	0.2138	0.2214	0.1734	0.1715	0.2839	0.27	0.2088	0.2182	0.3328	0.2537	0.2671	0.3298	0.3291	0.2608	0.2737	0.3021	0.3197	0.3262	0.3338	0.0428	111.015	0.04274	2006	1615	1186	2341	1260	983	1655	1163	70.04	63.46	57.68	57.12	27.35
PGAL8A_00126400	1071	471	43.98	PF3D7_1225300	conserved Plasmodium protein, unknown function		0.0856	0.1823	0.2077	0.0053	0.2264	0.0268	0.1829	0.2167	0.1891	0.1884	0.1747	0.175	0.209	0.2277	0.207	0.1965	0.1843	0.2041	0.2011	0.178	0.2095	0.2042	0.2014	0.1944	0.1898	0.217	0.2146	0.0344	115.507	0.05842	820	1660	2279	2261	1872	3267	1636	1860	77.41	68.74	58.28	43.67	55.43
PGAL8A_00126500	687	63	9.17	PF3D7_1225400	conserved Plasmodium protein, unknown function		0.1564	0.2269	0.2068	0	0.3197	0.0503	0.2269	0.298	0.2057	0.2009	0.1856	0.1855	0.1944	0.2783	0.1843	0.1915	0.1364	0.0862	0.0833	0.1364	0.2068	0.0865	0.0833	0.0755	0.0744	0.1413	0.1369	0.0004	9.321	0.02416	116	1112	2290	3943	1045	2146	1119	1058	71.78	55.17	17.08	5.14	66.57
PGAL8A_00126600	1197	348	29.07	PF3D7_1225500	small subunit rRNA processing factor, putative		0.0604	0.1882	0.2716	0.0143	0.2488	0.0698	0.1876	0.2216	0.1573	0.1713	0.1778	0.1773	0.1866	0.237	0.1438	0.1544	0.248	0.2747	0.2695	0.249	0.2782	0.2706	0.2651	0.2586	0.2523	0.2828	0.2863	0.0271	14.865	0.20118	1640	1567	1649	671	1628	1419	1574	1805	80.77	75.4	35	30.86	56.84
PGAL8A_00126700	2373	1074	45.26	PF3D7_1225600	conserved Plasmodium protein, unknown function		0.0524	0.2022	0.2954	0.0045	0.2507	0.089	0.2009	0.2219	0.1801	0.1782	0.2028	0.2019	0.2211	0.2581	0.1942	0.1919	0.2621	0.2515	0.2501	0.2622	0.2948	0.2504	0.249	0.275	0.2641	0.302	0.2957	0.0227	70.625	0.06278	1979	1384	1476	2491	1610	913	1405	1801	87.55	77.06	57.87	46.58	56.38
PGAL8A_00126800	4167	1920	46.08	PF3D7_1225700	VAC14 domain-containing protein, putative		0.0461	0.0993	0.2295	0.0036	0.2559	0.0701	0.101	0.2348	0.1603	0.1586	0.0944	0.0943	0.2306	0.2515	0.1508	0.1532	0.2109	0.1477	0.1468	0.2122	0.2297	0.1502	0.1496	0.2511	0.2502	0.272	0.2669	0.0191	34.22	0.0434	2270	3031	2053	2762	1554	1410	3000	1652	75.16	68.08	52.29	36.49	26.17
PGAL8A_00126900	3330	2805	84.23	PF3D7_1225800	ubiquitin-activating enzyme E1		0.0289	0.0993	0.1534	0.0054	0.1483	0.055	0.0983	0.1338	0.1408	0.1338	0.0952	0.0942	0.1318	0.1422	0.1355	0.1329	0.1392	0.1438	0.1399	0.1394	0.1524	0.1425	0.138	0.166	0.1623	0.1776	0.1738	0.0271	208.05	0.02778	3092	3031	2873	2202	2779	1957	3055	2917	76.99	74.8	84.89	81.93	49.52
PGAL8A_00127000	1986	1128	56.8	PF3D7_1225900	conserved Plasmodium protein, unknown function		0.0677	0.1764	0.366	0.0125	0.3261	0.0812	0.176	0.2778	0.1944	0.1806	0.1899	0.1855	0.2863	0.3343	0.1943	0.1832	0.3382	0.2158	0.2115	0.3383	0.3597	0.2119	0.211	0.3091	0.3253	0.3504	0.3599	0.034	62.48	0.06594	1325	1755	991	851	998	1085	1753	1218	18	29.96	33.55	47.19	18.35
PGAL8A_00127100	2607	1305	50.06	PF3D7_1226000	conserved Plasmodium protein, unknown function		0.0559	0.196	0.3583	0.0066	0.3253	0.0826	0.2016	0.3009	0.1961	0.1848	0.1959	0.199	0.3086	0.3441	0.1856	0.1763	0.3487	0.2308	0.2316	0.3538	0.3621	0.2385	0.2363	0.3129	0.3076	0.3306	0.3246	0.0348	15.648	0.0696	1831	1459	1025	1906	1003	1051	1393	1045	11.89	36	18.49	14.45	14.33
PGAL8A_00127200	900	618	68.67	PF3D7_1226100	haloacid dehalogenase-like hydrolase, putative		0.3979	0.4013	0.3867	0.0131	0.5684	0.0962	0.4008	0.5202	0.4994	0.5231	0.4806	0.4824	0.6892	0.667	0.5844	0.6028	0.3886	0.2851	0.3006	0.4027	0.3874	0.2936	0.305	0.4927	0.4858	0.4885	0.4867	0.0506	40.766	0.09606	11	233	876	781	207	761	234	223	49.9	13.74	45.96	42.01	89.58
PGAL8A_00127400	888	786	88.51	PF3D7_1226300	haloacid dehalogenase-like hydrolase, putative		0.0274	0.0516	0.0394	0.0015	0.0543	0.0149	0.0497	0.0478	0.0551	0.0531	0.0573	0.0552	0.051	0.0544	0.0538	0.0515	0.0438	0.0459	0.047	0.0417	0.0372	0.044	0.045	0.0448	0.046	0.0481	0.0497	0.0031	109.466	0.00936	3159	3811	4039	3385	3908	3785	3834	3973	91.33	90.88	91.41	94.7	88.75
PGAL8A_00127500	2472	1689	68.33	PF3D7_1226400	conserved Plasmodium protein, unknown function		0.0332	0.0944	0.1874	0.0084	0.1965	0.0613	0.0939	0.1626	0.1277	0.1273	0.0924	0.0919	0.1565	0.186	0.1139	0.1149	0.1596	0.1357	0.1327	0.1609	0.1899	0.1373	0.1349	0.1991	0.1971	0.2201	0.2197	0.0144	17.843	0.03284	2880	3124	2481	1519	2200	1703	3132	2546	71.75	74.69	71.14	69.26	65.66
PGAL8A_00127600	3825	2124	55.53	PF3D7_1226500	RAP protein, putative		0.0547	0.1734	0.3903	0.018	0.3562	0.1145	0.1667	0.339	0.1649	0.1615	0.1794	0.1736	0.3503	0.3622	0.1759	0.1719	0.3453	0.2194	0.2192	0.3452	0.388	0.2198	0.2195	0.3236	0.3269	0.3545	0.3587	0.016	13.588	0.07174	1883	1793	854	383	816	503	1893	788	23.97	40.44	21.01	29.35	14.35
PGAL8A_00127700	795	699	87.92	PF3D7_1226600	proliferating cell nuclear antigen 2		0.0118	0.0121	0.0264	0.0001	0.0315	0.006	0.012	0.0334	0.0216	0.0215	0.0168	0.0169	0.0352	0.033	0.0273	0.0267	0.0287	0.0236	0.0236	0.0287	0.0265	0.024	0.0239	0.0274	0.0274	0.0273	0.0274	0.0002	449.427	0.00684	3884	4221	4143	3612	4109	4089	4220	4091	27.43	56.4	78.86	74.92	68.5
PGAL8A_00127800	1788	1107	61.91	PF3D7_1226700	U3 small nucleolar RNA-interacting protein 2, putative		0.0333	0.0815	0.1835	0.0042	0.1622	0.0359	0.0815	0.1511	0.1046	0.1031	0.084	0.0842	0.1496	0.1536	0.1071	0.1044	0.1685	0.1023	0.1006	0.1679	0.1826	0.1016	0.1	0.1642	0.1576	0.1759	0.1765	0.0132	20.41	0.03944	2875	3351	2526	2591	2624	2819	3346	2679	86.33	79.99	50.48	39.41	67.68
PGAL8A_00127900	1143	948	82.94	PF3D7_1226800	ataxin-3, putative		0.0307	0.0921	0.1573	0.0012	0.1523	0.0511	0.092	0.1632	0.1048	0.1	0.0944	0.0943	0.1746	0.1586	0.1059	0.1016	0.1728	0.121	0.1139	0.175	0.1595	0.1212	0.114	0.1533	0.1444	0.155	0.1462	0.0053	264.617	0.03696	3011	3161	2830	3456	2746	2103	3162	2540	52.17	58.47	79.11	83.54	65.31
PGAL8A_00128000	1386	930	67.1	PF3D7_1226900	conserved Plasmodium protein, unknown function		0.1348	0.2979	0.3769	0.0037	0.3995	0.1689	0.299	0.4622	0.5473	0.5443	0.3295	0.3283	0.439	0.4361	0.5463	0.5371	0.4311	0.4945	0.4816	0.4296	0.3755	0.489	0.4783	0.606	0.5954	0.6032	0.5906	0.0973	335.511	0.09056	198	574	927	2737	608	105	563	330	39.31	69.5	63.89	64.55	66.9
PGAL8A_00128100	483	414	85.71	PF3D7_1227000	conserved Plasmodium protein, unknown function		0.0869	0.2472	0.5117	0	0.4559	0.0355	0.2463	0.4091	0.4522	0.4663	0.2796	0.2826	0.4075	0.4281	0.4708	0.4916	0.4554	0.4144	0.4334	0.4569	0.5138	0.4158	0.435	0.444	0.4652	0.5285	0.5422	0.045	7.068	0.03952	789	917	419	3943	417	2837	925	480	14.96	37.41	52.1	64.93	78.93
PGAL8A_00128200	2103	1275	60.63	PF3D7_1227100	DNA helicase 60		0.026	0.0852	0.1833	0.0046	0.1706	0.0504	0.0811	0.1446	0.0781	0.0775	0.0856	0.0809	0.1433	0.1729	0.0761	0.0757	0.1655	0.1099	0.1092	0.1607	0.1779	0.107	0.1064	0.1354	0.1369	0.1628	0.1649	0.0038	42.684	0.0322	3236	3289	2530	2465	2523	2142	3352	2776	60.71	70.35	67.73	55.24	17.66
PGAL8A_00128300	5646	3003	53.19	PF3D7_1227200	potassium channel	KCh1	0.0376	0.0755	0.0978	0.0012	0.105	0.0212	0.0751	0.095	0.1154	0.1168	0.0725	0.0723	0.0957	0.1043	0.1114	0.113	0.0905	0.1147	0.1144	0.0898	0.0969	0.1152	0.1149	0.115	0.1137	0.1231	0.1237	0.0069	9.531	0.01532	2660	3437	3523	3456	3348	3511	3454	3439	71.63	79.04	61.49	56.95	35.52
PGAL8A_00128400	3069	1041	33.92	PF3D7_1227300	conserved Plasmodium protein, unknown function		0.1807	0.3873	0.6039	0.0203	0.6026	0.1486	0.4029	0.536	0.4367	0.4507	0.4109	0.4185	0.6068	0.6676	0.4991	0.497	0.5625	0.4782	0.493	0.5818	0.6123	0.4727	0.5015	0.587	0.5896	0.6678	0.6736	0.0278	21.71	0.16362	82	262	249	283	174	178	229	206	30.53	37.37	31.11	60.76	14.7
PGAL8A_00128600	7053	2262	32.07	PF3D7_1227500	protein SOC2, putative		0.0679	0.2043	0.3024	0.0168	0.2802	0.0997	0.2035	0.2393	0.3131	0.3112	0.2101	0.2074	0.2582	0.2873	0.3119	0.3108	0.2843	0.3369	0.3351	0.2798	0.3033	0.3323	0.3312	0.3809	0.3907	0.3835	0.3861	0.0316	47.277	0.06206	1319	1352	1408	464	1321	719	1369	1607	22.49	16.84	62.28	67.79	50.67
PGAL8A_00128700	2457	1011	41.15	PF3D7_1227600	conserved Plasmodium protein, unknown function		0.0828	0.2576	0.3827	0.0099	0.3455	0.1091	0.2604	0.3134	0.1882	0.1859	0.2546	0.2569	0.3245	0.3363	0.2207	0.2183	0.3997	0.2832	0.2865	0.3993	0.3823	0.2884	0.2887	0.3463	0.343	0.3993	0.4025	0.0096	128.902	0.07296	890	838	894	1208	877	581	818	959	42.82	39.35	83.35	81.5	60.67
PGAL8A_00128800	2256	999	44.28	PF3D7_1227700	conserved Plasmodium protein, unknown function		0.0882	0.1935	0.3019	0.0046	0.4193	0.0907	0.19	0.3701	0.2895	0.3019	0.2275	0.224	0.3799	0.4243	0.3119	0.3228	0.2884	0.2602	0.2662	0.2895	0.304	0.2583	0.2646	0.417	0.408	0.4171	0.408	0.0328	115.877	0.03902	754	1496	1414	2465	523	874	1545	631	77.01	62.96	52.61	76.16	44.54
PGAL8A_00128900	3108	1911	61.49	PF3D7_1227800	elongator complex protein 3, putative		0.0253	0.0645	0.1265	0.0012	0.1337	0.0362	0.0659	0.1234	0.0819	0.0813	0.0582	0.0597	0.1233	0.1306	0.0773	0.0766	0.1214	0.0767	0.0739	0.1202	0.1275	0.0782	0.0754	0.1237	0.126	0.1282	0.1289	0.0037	35.976	0.01618	3267	3633	3164	3456	2971	2799	3616	3062	81.51	87.59	53.68	33.58	24.86
PGAL8A_00129000	1500	798	53.2	PF3D7_1227900	RNA pseudouridylate synthase, putative		0.0431	0.1651	0.284	0.0056	0.2613	0.0688	0.1668	0.2382	0.1518	0.145	0.1527	0.1547	0.2301	0.25	0.1489	0.1399	0.2538	0.1877	0.1881	0.2546	0.285	0.1886	0.1891	0.2606	0.2668	0.2621	0.2687	0.0107	15.895	0.05748	2411	1904	1554	2148	1508	1453	1890	1619	56.21	66.16	25.84	21.86	40.18
[truncated: 3,197 more rows]
[truncated: 14 more columns]

## Sheet: Top dN genes
Supplemental Table S10. Genes from significant GO (Gene ontology) enrichment.
[truncated: 23 more rows]
